# Supplementary material for: Systematic Analysis of Long Non-Coding RNAs and mRNAs in the Ovaries of Duroc Pigs During Different Follicular Stages Using RNA Sequencing
Source: Int J Mol Sci. 2018 Jun 11;19(6):1722. doi: 10.3390/ijms19061722 (PMC6032137; doi:10.3390/ijms19061722)
Supplement: Supplementary file 1 [file ijms-19-01722-s001.zip]

Archive with 7 entries (7 files):
- Supplementary Figure.pdf
- Supplementary Table S1.xlsx
- Supplementary Table S2.xlsx
- Supplementary Table S3.xlsx
- Supplementary Table S4.xlsx
- Supplementary Table S5.xlsx
- Supplementary Table S6.xlsx
