# Supplementary material for: Systematic Analysis of Long Non-Coding RNAs and mRNAs in the Ovaries of Duroc Pigs During Different Follicular Stages Using RNA Sequencing
Source: Int J Mol Sci. 2018 Jun 11;19(6):1722. doi: 10.3390/ijms19061722 (PMC6032137; doi:10.3390/ijms19061722)
Supplement: Supplementary file 1 [file ijms-19-01722-s001.zip › Supplementary Table S1.xlsx]

## Sheet: Table S1
Systematic analysis of long non-coding RNAs and mRNAs in the ovaries of Duroc pigs during different follicular stages using RNA sequencing Yi Liu, Mengxun Li, Xinwen Bo, Li Tao, Lipeng Ma, Tenjiao Zhai, Tao Huang
Supplementary Table S1. The information of 2,076(1362 annotated lncRNAs and 714 novel lncRNAs)lncRNA transcripts.
Novel_lncRNA_ID	Novel_lncRNA_Gene_ID	Gene_Type	Status	Chromosome	Start	End	Strand	Exon_number	Length	ORF
LNC_000141	XLOC_008473	lincRNA	Novel_lncRNA	chr1	108805406	108816318	+	3	765	84
LNC_000140	XLOC_008349	antisense_lncRNA	Novel_lncRNA	chr1	87101223	87105770	+	2	2534	124
LNC_000217	XLOC_016186	antisense_lncRNA	Novel_lncRNA	chr11	34987528	34989765	-	2	1559	180
LNC_000216	XLOC_016167	lincRNA	Novel_lncRNA	chr11	26168882	26183972	-	2	369	88
LNC_000215	XLOC_016049	lincRNA	Novel_lncRNA	chr11	14710080	14710597	-	2	427	40
LNC_000214	XLOC_015969	lincRNA	Novel_lncRNA	chr11	9879455	9894728	-	2	1804	136
LNC_000213	XLOC_015492	lincRNA	Novel_lncRNA	chr11	48600857	48606807	+	2	5693	139
LNC_000212	XLOC_015423	lincRNA	Novel_lncRNA	chr11	19543477	19563631	+	2	2593	117
LNC_000211	XLOC_015410	lincRNA	Novel_lncRNA	chr11	18916105	18918868	+	2	1578	100
LNC_000210	XLOC_015342	lincRNA	Novel_lncRNA	chr11	14651851	14660615	+	2	8480	170
LNC_000219	XLOC_016247	lincRNA	Novel_lncRNA	chr11	50961827	51001456	-	2	2920	141
LNC_000218	XLOC_016225	lincRNA	Novel_lncRNA	chr11	50748492	50756474	-	2	7858	150
LNC_000149	XLOC_010025	lincRNA	Novel_lncRNA	chr1	263444152	263452846	+	2	379	107
LNC_000221	XLOC_016368	antisense_lncRNA	Novel_lncRNA	chr11	73576371	73593223	-	2	933	128
LNC_000657	XLOC_059626	lincRNA	Novel_lncRNA	chr8	135803756	135876423	-	2	12316	100
LNC_000656	XLOC_059525	lincRNA	Novel_lncRNA	chr8	130441635	130451176	-	2	1206	86
LNC_000655	XLOC_059132	lincRNA	Novel_lncRNA	chr8	89975196	90008785	-	2	549	115
LNC_000654	XLOC_059111	antisense_lncRNA	Novel_lncRNA	chr8	87610896	87626096	-	5	1708	160
LNC_000653	XLOC_059111	antisense_lncRNA	Novel_lncRNA	chr8	87608852	87626096	-	6	1999	119
LNC_000652	XLOC_059036	lincRNA	Novel_lncRNA	chr8	80976458	80978158	-	2	1176	118
LNC_000651	XLOC_059005	lincRNA	Novel_lncRNA	chr8	78488932	78543935	-	3	4664	160
LNC_000650	XLOC_059005	lincRNA	Novel_lncRNA	chr8	78488932	78543935	-	2	4517	130
LNC_000714	XLOC_065436	lincRNA	Novel_lncRNA	chrX	143994388	144016730	-	6	939	142
LNC_000712	XLOC_065313	lincRNA	Novel_lncRNA	chrX	123382863	123384511	-	2	594	122
LNC_000713	XLOC_065436	lincRNA	Novel_lncRNA	chrX	143986421	144005893	-	7	2421	222
LNC_000659	XLOC_059871	lincRNA	Novel_lncRNA	chr8	141716249	141718667	-	2	2124	95
LNC_000658	XLOC_059862	lincRNA	Novel_lncRNA	chr8	141219866	141236373	-	2	4674	138
LNC_000060	XLOC_002585	lincRNA	Novel_lncRNA	GL894077.1	14249	28161	+	5	990	185
LNC_000061	XLOC_002647	lincRNA	Novel_lncRNA	GL894083.2	1065	3939	+	2	2699	136
LNC_000062	XLOC_002648	lincRNA	Novel_lncRNA	GL894083.2	4062	8153	+	2	3585	172
LNC_000063	XLOC_002740	lincRNA	Novel_lncRNA	GL894181.1	29945	36902	-	3	410	74
LNC_000064	XLOC_002896	lincRNA	Novel_lncRNA	GL894251.1	97159	101669	+	2	4454	125
LNC_000065	XLOC_002933	lincRNA	Novel_lncRNA	GL894261.2	102216	111624	+	3	1224	141
LNC_000066	XLOC_002954	lincRNA	Novel_lncRNA	GL894272.1	19523	59803	-	4	2075	99
LNC_000067	XLOC_002954	lincRNA	Novel_lncRNA	GL894272.1	24131	59803	-	5	487	65
LNC_000103	XLOC_005245	lincRNA	Novel_lncRNA	GL896210.1	1508	4478	+	3	979	200
LNC_000102	XLOC_005206	lincRNA	Novel_lncRNA	GL896197.1	30788	32362	+	2	1513	86
LNC_000101	XLOC_005083	lincRNA	Novel_lncRNA	GL896104.1	4862	6722	-	2	273	90
LNC_000100	XLOC_004944	lincRNA	Novel_lncRNA	GL895985.1	6055	8253	+	2	2014	192
LNC_000107	XLOC_005619	lincRNA	Novel_lncRNA	GL896348.1	34195	40371	-	3	1676	129
LNC_000106	XLOC_005310	lincRNA	Novel_lncRNA	GL896227.2	11037	23481	-	3	366	70
LNC_000105	XLOC_005309	lincRNA	Novel_lncRNA	GL896227.2	86004	91080	+	2	486	113
LNC_000104	XLOC_005267	lincRNA	Novel_lncRNA	GL896219.1	4759	8652	+	3	633	102
LNC_000262	XLOC_020325	lincRNA	Novel_lncRNA	chr13	130561871	130568734	+	2	3822	152
LNC_000263	XLOC_020391	lincRNA	Novel_lncRNA	chr13	134922753	134938633	+	2	15561	149
LNC_000260	XLOC_020038	antisense_lncRNA	Novel_lncRNA	chr13	118012646	118018398	+	2	4532	181
LNC_000261	XLOC_020083	lincRNA	Novel_lncRNA	chr13	120291973	120292792	+	2	717	102
LNC_000266	XLOC_020820	antisense_lncRNA	Novel_lncRNA	chr13	157485792	157492396	+	3	6225	146
LNC_000267	XLOC_021072	lincRNA	Novel_lncRNA	chr13	196555387	196591036	+	2	859	51
LNC_000264	XLOC_020554	lincRNA	Novel_lncRNA	chr13	148857612	148906258	+	3	222	64
LNC_000265	XLOC_020755	lincRNA	Novel_lncRNA	chr13	154583670	154584536	+	2	498	68
LNC_000268	XLOC_021122	lincRNA	Novel_lncRNA	chr13	207738050	207739790	+	2	1463	111
LNC_000269	XLOC_021345	lincRNA	Novel_lncRNA	chr13	17265714	17306232	-	3	924	123
LNC_000622	XLOC_057161	lincRNA	Novel_lncRNA	chr8	16931210	16944973	+	5	466	55
LNC_000623	XLOC_057214	lincRNA	Novel_lncRNA	chr8	24550092	24562617	+	2	12469	109
LNC_000620	XLOC_057102	lincRNA	Novel_lncRNA	chr8	8792033	8886008	+	5	2753	126
LNC_000621	XLOC_057156	antisense_lncRNA	Novel_lncRNA	chr8	15470550	15473573	+	2	1150	116
LNC_000626	XLOC_057370	lincRNA	Novel_lncRNA	chr8	33079815	33084513	+	2	1177	91
LNC_000627	XLOC_057389	lincRNA	Novel_lncRNA	chr8	35048951	35116292	+	2	377	81
LNC_000624	XLOC_057343	lincRNA	Novel_lncRNA	chr8	31504111	31512269	+	2	8082	148
LNC_000625	XLOC_057361	lincRNA	Novel_lncRNA	chr8	32548439	32553755	+	2	4605	99
LNC_000628	XLOC_057432	lincRNA	Novel_lncRNA	chr8	44262057	44281382	+	2	4082	135
LNC_000629	XLOC_057599	antisense_lncRNA	Novel_lncRNA	chr8	69894816	69904168	+	2	1832	108
LNC_000439	XLOC_036775	lincRNA	Novel_lncRNA	chr2	92063643	92082573	+	2	7775	108
LNC_000438	XLOC_036667	lincRNA	Novel_lncRNA	chr2	85033721	85038671	+	2	1284	98
LNC_000437	XLOC_036667	lincRNA	Novel_lncRNA	chr2	85012294	85038671	+	2	1284	98
LNC_000436	XLOC_036516	antisense_lncRNA	Novel_lncRNA	chr2	76712389	76714978	+	2	2485	116
LNC_000435	XLOC_036447	antisense_lncRNA	Novel_lncRNA	chr2	73217378	73286172	+	2	956	73
LNC_000434	XLOC_036437	lincRNA	Novel_lncRNA	chr2	72755516	72756128	+	2	347	115
LNC_000433	XLOC_036170	lincRNA	Novel_lncRNA	chr2	59400295	59404255	+	2	452	83
LNC_000432	XLOC_035978	lincRNA	Novel_lncRNA	chr2	36594058	36602388	+	5	1067	82
LNC_000431	XLOC_035978	lincRNA	Novel_lncRNA	chr2	36594058	36595567	+	2	1202	115
LNC_000430	XLOC_035978	lincRNA	Novel_lncRNA	chr2	36594058	36595567	+	2	1331	115
LNC_000536	XLOC_046629	lincRNA	Novel_lncRNA	chr5	32293580	32346209	+	4	3371	130
LNC_000537	XLOC_046835	lincRNA	Novel_lncRNA	chr5	53104288	53107457	+	2	1358	129
LNC_000534	XLOC_046188	lincRNA	Novel_lncRNA	chr5	1898781	1899967	+	2	674	132
LNC_000535	XLOC_046382	lincRNA	Novel_lncRNA	chr5	15676476	15690510	+	2	2941	124
LNC_000532	XLOC_046028	lincRNA	Novel_lncRNA	chr4	133953576	133959257	-	3	1726	134
LNC_000533	XLOC_046133	lincRNA	Novel_lncRNA	chr4	141105992	141108490	-	2	1750	105
LNC_000530	XLOC_045761	antisense_lncRNA	Novel_lncRNA	chr4	110300877	110453452	-	3	4319	204
LNC_000531	XLOC_045831	antisense_lncRNA	Novel_lncRNA	chr4	116619497	116623636	-	2	2630	125
LNC_000538	XLOC_046857	lincRNA	Novel_lncRNA	chr5	53375703	53384104	+	2	8228	111
LNC_000539	XLOC_046857	lincRNA	Novel_lncRNA	chr5	53376611	53384104	+	2	7320	111
LNC_000088	XLOC_004279	lincRNA	Novel_lncRNA	GL895331.1	3872	10030	+	2	3162	109
LNC_000089	XLOC_004316	lincRNA	Novel_lncRNA	GL895357.2	3728	4875	+	2	1033	91
LNC_000082	XLOC_003882	lincRNA	Novel_lncRNA	GL895000.1	17329	18688	+	3	801	80
LNC_000083	XLOC_003962	lincRNA	Novel_lncRNA	GL895066.1	21410	31179	+	2	1301	105
LNC_000080	XLOC_003633	lincRNA	Novel_lncRNA	GL894755.1	7167	8213	-	2	1003	164
LNC_000081	XLOC_003882	lincRNA	Novel_lncRNA	GL895000.1	17328	18688	+	2	750	80
LNC_000086	XLOC_004018	lincRNA	Novel_lncRNA	GL895110.2	196013	201700	-	2	5453	104
LNC_000087	XLOC_004218	lincRNA	Novel_lncRNA	GL895288.1	26493	81119	+	2	594	113
LNC_000084	XLOC_004011	lincRNA	Novel_lncRNA	GL895108.1	14001	24204	+	3	321	74
LNC_000085	XLOC_004011	lincRNA	Novel_lncRNA	GL895108.1	14009	24204	+	2	245	67
LNC_000688	XLOC_062673	lincRNA	Novel_lncRNA	chr9	52590729	52594863	-	2	2055	110
LNC_000323	XLOC_026053	lincRNA	Novel_lncRNA	chr14	33500277	33502710	-	2	1846	121
LNC_000322	XLOC_025858	lincRNA	Novel_lncRNA	chr14	17851765	17859291	-	3	521	117
LNC_000321	XLOC_025757	lincRNA	Novel_lncRNA	chr14	444517	454479	-	2	7723	149
LNC_000320	XLOC_025731	lincRNA	Novel_lncRNA	chr14	152204905	152206955	+	2	1133	103
LNC_000327	XLOC_026896	lincRNA	Novel_lncRNA	chr14	87927843	87930429	-	2	895	146
LNC_000326	XLOC_026475	lincRNA	Novel_lncRNA	chr14	60032838	60035722	-	2	1892	107
LNC_000325	XLOC_026353	antisense_lncRNA	Novel_lncRNA	chr14	54546433	54566932	-	3	1872	205
LNC_000324	XLOC_026141	lincRNA	Novel_lncRNA	chr14	43440495	43448313	-	5	2562	103
LNC_000442	XLOC_036841	lincRNA	Novel_lncRNA	chr2	104541805	104590420	+	2	1486	93
LNC_000443	XLOC_036869	lincRNA	Novel_lncRNA	chr2	106475468	106623870	+	4	469	111
LNC_000329	XLOC_027006	lincRNA	Novel_lncRNA	chr14	102539207	102560605	-	2	773	74
LNC_000328	XLOC_027006	lincRNA	Novel_lncRNA	chr14	102417562	102560608	-	3	603	100
LNC_000446	XLOC_037005	lincRNA	Novel_lncRNA	chr2	121030486	121075567	+	2	17829	136
LNC_000447	XLOC_037005	lincRNA	Novel_lncRNA	chr2	121030633	121075567	+	2	9575	134
LNC_000444	XLOC_036869	lincRNA	Novel_lncRNA	chr2	106475520	106545193	+	4	630	107
LNC_000445	XLOC_036987	lincRNA	Novel_lncRNA	chr2	120846159	120864261	+	3	1016	87
LNC_000147	XLOC_009206	lincRNA	Novel_lncRNA	chr1	165597065	165598489	+	2	767	134
LNC_000146	XLOC_009014	lincRNA	Novel_lncRNA	chr1	152019306	152027667	+	2	4664	134
LNC_000145	XLOC_009007	lincRNA	Novel_lncRNA	chr1	151525168	151560747	+	4	1314	97
LNC_000144	XLOC_008721	antisense_lncRNA	Novel_lncRNA	chr1	126393974	126424589	+	4	719	116
LNC_000143	XLOC_008573	lincRNA	Novel_lncRNA	chr1	122589343	122596487	+	2	7013	138
LNC_000142	XLOC_008570	lincRNA	Novel_lncRNA	chr1	122532213	122565788	+	2	32808	211
LNC_000228	XLOC_016913	lincRNA	Novel_lncRNA	chr12	25352322	25353621	+	3	1136	161
LNC_000229	XLOC_017133	lincRNA	Novel_lncRNA	chr12	40846741	40848909	+	2	1577	105
LNC_000226	XLOC_016653	lincRNA	Novel_lncRNA	chr12	11264209	11300942	+	4	332	110
LNC_000227	XLOC_016810	antisense_lncRNA	Novel_lncRNA	chr12	20375313	20376732	+	2	724	98
LNC_000224	XLOC_016528	lincRNA	Novel_lncRNA	chr12	894369	900486	+	2	5746	328
LNC_000225	XLOC_016629	lincRNA	Novel_lncRNA	chr12	6571979	6575999	+	3	2487	202
LNC_000222	XLOC_016392	lincRNA	Novel_lncRNA	chr11	74791780	74792950	-	2	1100	146
LNC_000223	XLOC_016480	lincRNA	Novel_lncRNA	chr11	84483353	84493899	-	2	10421	186
LNC_000220	XLOC_016258	lincRNA	Novel_lncRNA	chr11	52192742	52195090	-	2	657	94
LNC_000148	XLOC_009507	lincRNA	Novel_lncRNA	chr1	202712759	202713803	+	2	941	117
LNC_000587	XLOC_052025	lincRNA	Novel_lncRNA	chr6	55979903	56001075	-	3	2363	120
LNC_000586	XLOC_052023	lincRNA	Novel_lncRNA	chr6	55957949	55963244	-	2	1881	161
LNC_000585	XLOC_051837	lincRNA	Novel_lncRNA	chr6	48257519	48260877	-	2	2735	118
LNC_000584	XLOC_051645	antisense_lncRNA	Novel_lncRNA	chr6	40390790	40394150	-	2	2713	220
LNC_000583	XLOC_051612	lincRNA	Novel_lncRNA	chr6	37091565	37141937	-	5	1141	122
LNC_000582	XLOC_051500	lincRNA	Novel_lncRNA	chr6	23821927	23838331	-	2	13157	127
LNC_000581	XLOC_051436	lincRNA	Novel_lncRNA	chr6	13986551	13993616	-	2	2115	140
LNC_000580	XLOC_051313	lincRNA	Novel_lncRNA	chr6	8475783	8481189	-	3	2674	136
LNC_000666	XLOC_061157	lincRNA	Novel_lncRNA	chr9	96415230	96416262	+	2	837	110
LNC_000667	XLOC_061238	lincRNA	Novel_lncRNA	chr9	100825840	100832057	+	4	2455	115
LNC_000664	XLOC_060737	lincRNA	Novel_lncRNA	chr9	57739958	57748068	+	3	3533	136
LNC_000665	XLOC_060739	lincRNA	Novel_lncRNA	chr9	57818534	57856100	+	2	849	95
LNC_000662	XLOC_060486	lincRNA	Novel_lncRNA	chr9	42701767	42704117	+	2	1954	134
LNC_000663	XLOC_060689	lincRNA	Novel_lncRNA	chr9	55603450	55608635	+	2	2172	205
LNC_000589	XLOC_052104	lincRNA	Novel_lncRNA	chr6	58193853	58194685	-	2	698	201
LNC_000588	XLOC_052094	lincRNA	Novel_lncRNA	chr6	57926932	57928894	-	2	1552	161
LNC_000039	XLOC_001315	lincRNA	Novel_lncRNA	GL893267.2	3017	7248	-	2	2039	99
LNC_000038	XLOC_001286	lincRNA	Novel_lncRNA	GL893252.1	1297	14805	+	2	1628	141
LNC_000033	XLOC_001067	lincRNA	Novel_lncRNA	GL893120.1	541	14387	-	2	408	122
LNC_000032	XLOC_000984	lincRNA	Novel_lncRNA	GL893070.1	19437	22659	+	3	916	83
LNC_000031	XLOC_000906	lincRNA	Novel_lncRNA	GL893011.1	61010	64025	+	3	576	80
LNC_000030	XLOC_000869	lincRNA	Novel_lncRNA	GL893000.2	190979	202497	+	2	1143	109
LNC_000037	XLOC_001281	lincRNA	Novel_lncRNA	GL893248.2	30089	30944	-	2	726	82
LNC_000036	XLOC_001259	lincRNA	Novel_lncRNA	GL893226.1	32427	36350	+	2	889	96
LNC_000035	XLOC_001121	lincRNA	Novel_lncRNA	GL893149.1	12958	15752	-	2	2170	151
LNC_000034	XLOC_001096	lincRNA	Novel_lncRNA	GL893138.2	12847	27096	-	3	1804	136
LNC_000132	XLOC_007305	lincRNA	Novel_lncRNA	JH118941.1	8529	9484	+	2	463	90
LNC_000133	XLOC_007306	lincRNA	Novel_lncRNA	JH118943.1	4045	18844	+	2	1953	99
LNC_000130	XLOC_007290	antisense_lncRNA	Novel_lncRNA	JH118939.1	11390	78917	-	3	400	108
LNC_000131	XLOC_007303	lincRNA	Novel_lncRNA	JH118940.1	147828	149879	-	2	291	72
LNC_000136	XLOC_007529	lincRNA	Novel_lncRNA	chr1	2971860	2973463	+	3	551	183
LNC_000137	XLOC_007623	lincRNA	Novel_lncRNA	chr1	4491061	4495472	+	2	1009	134
LNC_000134	XLOC_007369	lincRNA	Novel_lncRNA	JH118968.1	80619	100147	+	2	807	103
LNC_000135	XLOC_007369	lincRNA	Novel_lncRNA	JH118968.1	80658	100147	+	2	525	89
LNC_000138	XLOC_007690	lincRNA	Novel_lncRNA	chr1	10297729	10299213	+	2	701	158
LNC_000139	XLOC_008328	lincRNA	Novel_lncRNA	chr1	86510788	86524074	+	2	6833	98
LNC_000710	XLOC_064747	lincRNA	Novel_lncRNA	chrX	45287910	45301340	-	2	12201	202
LNC_000468	XLOC_039664	lincRNA	Novel_lncRNA	chr3	4756435	4766482	+	2	652	130
LNC_000711	XLOC_065260	lincRNA	Novel_lncRNA	chrX	112626143	112640441	-	3	725	96
LNC_000469	XLOC_039699	lincRNA	Novel_lncRNA	chr3	6555037	6556181	+	2	774	88
LNC_000109	XLOC_005780	lincRNA	Novel_lncRNA	GL896420.2	120	2831	-	2	969	80
LNC_000108	XLOC_005767	lincRNA	Novel_lncRNA	GL896412.1	25078	25718	-	2	213	70
LNC_000467	XLOC_039635	lincRNA	Novel_lncRNA	chr3	2955059	2969347	+	2	4108	191
LNC_000460	XLOC_038933	lincRNA	Novel_lncRNA	chr2	100643439	100650003	-	2	2868	104
LNC_000461	XLOC_039130	antisense_lncRNA	Novel_lncRNA	chr2	119122854	119135288	-	2	799	69
LNC_000068	XLOC_003065	lincRNA	Novel_lncRNA	GL894355.1	29034	30990	-	2	1261	178
LNC_000369	XLOC_030330	lincRNA	Novel_lncRNA	chr15	144223854	144238760	-	2	14621	152
LNC_000069	XLOC_003147	lincRNA	Novel_lncRNA	GL894420.1	48196	52892	-	2	4642	142
LNC_000367	XLOC_030229	lincRNA	Novel_lncRNA	chr15	134103865	134106064	-	2	545	106
LNC_000366	XLOC_030074	lincRNA	Novel_lncRNA	chr15	120677848	120680819	-	2	1817	117
LNC_000365	XLOC_029970	lincRNA	Novel_lncRNA	chr15	110977074	110983193	-	2	284	74
LNC_000364	XLOC_029851	lincRNA	Novel_lncRNA	chr15	96115191	96127977	-	2	12642	160
LNC_000363	XLOC_029610	lincRNA	Novel_lncRNA	chr15	74601870	74607949	-	2	5370	200
LNC_000362	XLOC_029530	lincRNA	Novel_lncRNA	chr15	71805448	71808657	-	2	2742	146
LNC_000361	XLOC_029279	lincRNA	Novel_lncRNA	chr15	34654400	34655145	-	2	516	172
LNC_000360	XLOC_029273	lincRNA	Novel_lncRNA	chr15	28764586	28766177	-	2	1132	94
LNC_000406	XLOC_033969	antisense_lncRNA	Novel_lncRNA	chr18	8470438	8493191	+	2	2225	119
LNC_000407	XLOC_034085	lincRNA	Novel_lncRNA	chr18	15697489	15712293	+	2	1906	165
LNC_000404	XLOC_033907	lincRNA	Novel_lncRNA	chr18	5445315	5453550	+	2	7807	168
LNC_000405	XLOC_033950	lincRNA	Novel_lncRNA	chr18	7273662	7285033	+	3	1050	160
LNC_000402	XLOC_033834	lincRNA	Novel_lncRNA	chr18	225408	229800	+	2	3371	201
LNC_000403	XLOC_033856	antisense_lncRNA	Novel_lncRNA	chr18	355456	381102	+	2	440	127
LNC_000400	XLOC_033661	lincRNA	Novel_lncRNA	chr17	51437055	51512568	-	3	785	141
LNC_000401	XLOC_033706	antisense_lncRNA	Novel_lncRNA	chr17	53734191	53737110	-	2	2466	156
LNC_000561	XLOC_048873	antisense_lncRNA	Novel_lncRNA	chr6	117994	173206	+	3	2113	253
LNC_000560	XLOC_048810	antisense_lncRNA	Novel_lncRNA	chr5	105186345	105194236	-	3	5191	145
LNC_000563	XLOC_049346	antisense_lncRNA	Novel_lncRNA	chr6	33613189	33619644	+	2	2920	148
LNC_000562	XLOC_049297	lincRNA	Novel_lncRNA	chr6	33042241	33065892	+	3	1646	113
LNC_000565	XLOC_049405	lincRNA	Novel_lncRNA	chr6	36049145	36054037	+	2	4825	208
LNC_000564	XLOC_049366	lincRNA	Novel_lncRNA	chr6	33724070	33726898	+	2	1364	97
LNC_000408	XLOC_034144	lincRNA	Novel_lncRNA	chr18	19067523	19093190	+	3	1270	133
LNC_000409	XLOC_034237	lincRNA	Novel_lncRNA	chr18	29912317	29928553	+	2	7202	114
LNC_000558	XLOC_048747	lincRNA	Novel_lncRNA	chr5	93819968	93830104	-	2	466	105
LNC_000559	XLOC_048786	lincRNA	Novel_lncRNA	chr5	101193226	101197027	-	2	3507	113
LNC_000318	XLOC_025681	lincRNA	Novel_lncRNA	chr14	146370403	146381932	+	2	1525	96
LNC_000319	XLOC_025686	lincRNA	Novel_lncRNA	chr14	146930325	146932533	+	2	1191	87
LNC_000312	XLOC_024835	lincRNA	Novel_lncRNA	chr14	60023147	60028564	+	2	5366	98
LNC_000313	XLOC_025033	lincRNA	Novel_lncRNA	chr14	81512336	81513947	+	2	465	82
LNC_000310	XLOC_024815	lincRNA	Novel_lncRNA	chr14	58988155	59028142	+	3	4518	119
LNC_000311	XLOC_024833	lincRNA	Novel_lncRNA	chr14	60012788	60020627	+	2	1940	145
LNC_000316	XLOC_025621	lincRNA	Novel_lncRNA	chr14	139917272	139931946	+	2	994	84
LNC_000317	XLOC_025680	lincRNA	Novel_lncRNA	chr14	146050856	146063915	+	2	12897	270
LNC_000314	XLOC_025055	lincRNA	Novel_lncRNA	chr14	82500141	82516710	+	2	1132	151
LNC_000315	XLOC_025586	lincRNA	Novel_lncRNA	chr14	135641901	135643247	+	2	442	93
LNC_000258	XLOC_019922	lincRNA	Novel_lncRNA	chr13	105208533	105226831	+	3	393	97
LNC_000709	XLOC_064515	lincRNA	Novel_lncRNA	chrX	144059022	144063392	+	2	3423	157
LNC_000708	XLOC_064514	lincRNA	Novel_lncRNA	chrX	143696239	143699552	+	2	1411	136
LNC_000705	XLOC_064169	lincRNA	Novel_lncRNA	chrX	98109176	98128335	+	3	3423	147
LNC_000550	XLOC_047749	lincRNA	Novel_lncRNA	chr5	14132340	14137522	-	3	1441	111
LNC_000707	XLOC_064251	lincRNA	Novel_lncRNA	chrX	111607501	111609961	+	2	906	67
LNC_000706	XLOC_064169	lincRNA	Novel_lncRNA	chrX	98109211	98128335	+	4	3556	147
LNC_000701	XLOC_063479	lincRNA	Novel_lncRNA	chr9	143287143	143290798	-	2	3370	109
LNC_000700	XLOC_063418	lincRNA	Novel_lncRNA	chr9	136515522	136516065	-	2	389	129
LNC_000703	XLOC_063806	antisense_lncRNA	Novel_lncRNA	chrX	48085653	48088482	+	2	2748	152
LNC_000551	XLOC_047827	antisense_lncRNA	Novel_lncRNA	chr5	17766766	17770648	-	2	3705	208
LNC_000077	XLOC_003496	lincRNA	Novel_lncRNA	GL894642.2	2170	4253	-	3	1969	88
LNC_000076	XLOC_003450	lincRNA	Novel_lncRNA	GL894621.1	30738	31130	-	2	235	78
LNC_000075	XLOC_003439	lincRNA	Novel_lncRNA	GL894614.2	21899	32920	-	2	587	116
LNC_000074	XLOC_003437	lincRNA	Novel_lncRNA	GL894614.2	21811	30673	+	2	499	141
LNC_000073	XLOC_003248	lincRNA	Novel_lncRNA	GL894503.2	95125	133468	+	2	10201	98
LNC_000072	XLOC_003248	lincRNA	Novel_lncRNA	GL894503.2	95125	133468	+	2	10451	98
LNC_000071	XLOC_003211	lincRNA	Novel_lncRNA	GL894475.1	13318	13875	+	2	290	96
LNC_000070	XLOC_003202	lincRNA	Novel_lncRNA	GL894466.1	31512	32394	-	2	820	71
LNC_000176	XLOC_012786	lincRNA	Novel_lncRNA	chr1	266618904	266621914	-	2	2849	81
LNC_000177	XLOC_012829	lincRNA	Novel_lncRNA	chr1	269793234	269811346	-	2	1606	87
LNC_000174	XLOC_012435	antisense_lncRNA	Novel_lncRNA	chr1	224788037	224792315	-	3	1946	116
LNC_000175	XLOC_012461	lincRNA	Novel_lncRNA	chr1	227936449	227953145	-	2	1417	135
LNC_000172	XLOC_012368	lincRNA	Novel_lncRNA	chr1	210360300	210373726	-	2	10622	215
LNC_000173	XLOC_012408	lincRNA	Novel_lncRNA	chr1	216688461	216693876	-	2	4882	159
LNC_000079	XLOC_003607	lincRNA	Novel_lncRNA	GL894750.2	104355	126836	+	2	3865	129
LNC_000078	XLOC_003572	lincRNA	Novel_lncRNA	GL894700.2	36700	47722	-	2	525	110
LNC_000271	XLOC_021653	lincRNA	Novel_lncRNA	chr13	38014325	38020530	-	2	845	123
LNC_000270	XLOC_021653	lincRNA	Novel_lncRNA	chr13	38014325	38020528	-	2	840	121
LNC_000273	XLOC_021687	lincRNA	Novel_lncRNA	chr13	43452991	43455163	-	3	1599	97
LNC_000272	XLOC_021656	antisense_lncRNA	Novel_lncRNA	chr13	38089496	38102587	-	2	606	146
LNC_000275	XLOC_021804	lincRNA	Novel_lncRNA	chr13	46440949	46444912	-	2	747	73
LNC_000274	XLOC_021765	lincRNA	Novel_lncRNA	chr13	46158340	46206212	-	4	3343	141
LNC_000277	XLOC_021886	lincRNA	Novel_lncRNA	chr13	51226979	51233411	-	3	2334	112
LNC_000276	XLOC_021883	lincRNA	Novel_lncRNA	chr13	51132178	51143875	-	2	1439	112
LNC_000279	XLOC_022048	lincRNA	Novel_lncRNA	chr13	58229080	58281446	-	2	46430	192
LNC_000278	XLOC_021951	lincRNA	Novel_lncRNA	chr13	52070991	52074047	-	2	2472	137
LNC_000429	XLOC_035881	lincRNA	Novel_lncRNA	chr2	27047225	27055963	+	2	1285	137
LNC_000631	XLOC_057618	lincRNA	Novel_lncRNA	chr8	71516164	71520617	+	2	1199	95
LNC_000630	XLOC_057599	lincRNA	Novel_lncRNA	chr8	69894840	69896966	+	2	1498	98
LNC_000633	XLOC_057903	lincRNA	Novel_lncRNA	chr8	93786935	93814307	+	2	428	58
LNC_000632	XLOC_057734	lincRNA	Novel_lncRNA	chr8	82262131	82282966	+	2	615	163
LNC_000635	XLOC_058211	lincRNA	Novel_lncRNA	chr8	141597473	141633305	+	2	3666	128
LNC_000634	XLOC_058207	lincRNA	Novel_lncRNA	chr8	141584060	141584920	+	2	640	118
LNC_000637	XLOC_058425	lincRNA	Novel_lncRNA	chr8	12551997	12559959	-	2	2903	113
LNC_000636	XLOC_058350	lincRNA	Novel_lncRNA	chr8	2703242	2723944	-	2	1232	225
LNC_000639	XLOC_058442	lincRNA	Novel_lncRNA	chr8	18134618	18143882	-	2	1594	86
LNC_000638	XLOC_058439	lincRNA	Novel_lncRNA	chr8	17041951	17067191	-	4	1271	87
LNC_000689	XLOC_062676	antisense_lncRNA	Novel_lncRNA	chr9	53483111	53564237	-	6	912	160
LNC_000002	XLOC_000037	lincRNA	Novel_lncRNA	GL892260.2	48420	52230	-	2	1806	86
LNC_000003	XLOC_000154	lincRNA	Novel_lncRNA	GL892371.1	2244	3662	-	2	1315	116
LNC_000001	XLOC_000037	lincRNA	Novel_lncRNA	GL892260.2	48227	50026	-	2	890	96
LNC_000006	XLOC_000344	lincRNA	Novel_lncRNA	GL892447.1	45555	46263	-	2	387	68
LNC_000007	XLOC_000344	lincRNA	Novel_lncRNA	GL892447.1	45555	46284	-	2	324	53
LNC_000004	XLOC_000342	lincRNA	Novel_lncRNA	GL892447.1	26178	29841	-	3	570	104
LNC_000005	XLOC_000342	lincRNA	Novel_lncRNA	GL892447.1	26178	29940	-	2	492	82
LNC_000008	XLOC_000361	lincRNA	Novel_lncRNA	GL892477.1	95200	113536	+	4	1163	139
LNC_000009	XLOC_000361	lincRNA	Novel_lncRNA	GL892477.1	95216	97927	+	2	466	97
LNC_000680	XLOC_061744	lincRNA	Novel_lncRNA	chr9	152560581	152566802	+	3	4269	153
LNC_000681	XLOC_061750	lincRNA	Novel_lncRNA	chr9	153389870	153407236	+	2	1704	151
LNC_000525	XLOC_045276	antisense_lncRNA	Novel_lncRNA	chr4	80766364	80794377	-	6	1320	93
LNC_000524	XLOC_045276	antisense_lncRNA	Novel_lncRNA	chr4	80766364	80794361	-	2	857	105
LNC_000527	XLOC_045295	lincRNA	Novel_lncRNA	chr4	82212019	82215590	-	2	2218	125
LNC_000526	XLOC_045276	antisense_lncRNA	Novel_lncRNA	chr4	80770871	80794361	-	4	520	93
LNC_000521	XLOC_045057	lincRNA	Novel_lncRNA	chr4	44535554	44541389	-	3	1630	160
LNC_000520	XLOC_045055	lincRNA	Novel_lncRNA	chr4	43627426	43632644	-	2	4553	152
LNC_000523	XLOC_045276	antisense_lncRNA	Novel_lncRNA	chr4	80759629	80794377	-	6	1102	87
LNC_000522	XLOC_045168	lincRNA	Novel_lncRNA	chr4	67859706	67867929	-	2	3355	132
LNC_000684	XLOC_061958	lincRNA	Novel_lncRNA	chr9	8102516	8108336	-	2	715	154
LNC_000685	XLOC_062233	lincRNA	Novel_lncRNA	chr9	23390620	23391902	-	2	354	83
LNC_000686	XLOC_062236	antisense_lncRNA	Novel_lncRNA	chr9	24285600	24334435	-	7	845	103
LNC_000687	XLOC_062419	lincRNA	Novel_lncRNA	chr9	40316511	40363947	-	2	3957	116
LNC_000529	XLOC_045761	lincRNA	Novel_lncRNA	chr4	110300877	110307465	-	2	4823	204
LNC_000528	XLOC_045307	lincRNA	Novel_lncRNA	chr4	83635449	83644549	-	4	679	63
LNC_000682	XLOC_061771	lincRNA	Novel_lncRNA	chr9	231231	239646	-	3	1600	128
LNC_000683	XLOC_061771	lincRNA	Novel_lncRNA	chr9	231231	239743	-	2	4784	206
LNC_000099	XLOC_004890	lincRNA	Novel_lncRNA	GL895945.1	12001	14994	+	2	1547	288
LNC_000098	XLOC_004880	lincRNA	Novel_lncRNA	GL895941.1	15084	17146	+	2	1958	98
LNC_000091	XLOC_004396	lincRNA	Novel_lncRNA	GL895450.2	79986	83742	-	2	3664	103
LNC_000090	XLOC_004378	lincRNA	Novel_lncRNA	GL895436.1	32462	35512	-	2	2916	93
LNC_000093	XLOC_004455	lincRNA	Novel_lncRNA	GL895483.1	9659	16495	-	2	2683	140
LNC_000092	XLOC_004428	antisense_lncRNA	Novel_lncRNA	GL895469.1	7837	12939	+	2	951	82
LNC_000095	XLOC_004646	lincRNA	Novel_lncRNA	GL895677.2	104430	106024	-	2	1527	67
LNC_000094	XLOC_004629	lincRNA	Novel_lncRNA	GL895666.1	8110	9101	+	2	559	110
LNC_000097	XLOC_004794	lincRNA	Novel_lncRNA	GL895839.1	7274	9277	-	2	667	126
LNC_000096	XLOC_004683	lincRNA	Novel_lncRNA	GL895732.2	2719	17445	+	3	507	85
LNC_000356	XLOC_029040	lincRNA	Novel_lncRNA	chr15	154608579	154611973	+	2	2666	300
LNC_000357	XLOC_029133	lincRNA	Novel_lncRNA	chr15	1985326	2005968	-	2	520	86
LNC_000354	XLOC_028886	lincRNA	Novel_lncRNA	chr15	142715637	142727526	+	2	11223	118
LNC_000355	XLOC_028922	lincRNA	Novel_lncRNA	chr15	145433227	145436159	+	2	623	87
LNC_000352	XLOC_028846	antisense_lncRNA	Novel_lncRNA	chr15	139249076	139250632	+	2	513	104
LNC_000353	XLOC_028886	lincRNA	Novel_lncRNA	chr15	142703565	142727526	+	2	4606	103
LNC_000350	XLOC_028546	antisense_lncRNA	Novel_lncRNA	chr15	116768529	116858902	+	4	1778	91
LNC_000351	XLOC_028695	antisense_lncRNA	Novel_lncRNA	chr15	122430518	122439719	+	2	5111	175
LNC_000451	XLOC_037203	lincRNA	Novel_lncRNA	chr2	132517872	132524416	+	4	645	84
LNC_000450	XLOC_037118	lincRNA	Novel_lncRNA	chr2	128987017	129344643	+	5	1046	103
LNC_000453	XLOC_037294	antisense_lncRNA	Novel_lncRNA	chr2	142257672	142286009	+	5	532	73
LNC_000452	XLOC_037231	lincRNA	Novel_lncRNA	chr2	137337946	137453103	+	5	657	113
LNC_000455	XLOC_038162	lincRNA	Novel_lncRNA	chr2	43619451	43627196	-	2	707	80
LNC_000454	XLOC_037469	lincRNA	Novel_lncRNA	chr2	155275904	155281259	+	2	3776	270
LNC_000358	XLOC_029175	lincRNA	Novel_lncRNA	chr15	5698826	5703992	-	2	315	59
LNC_000359	XLOC_029254	lincRNA	Novel_lncRNA	chr15	22538744	22544859	-	2	4066	95
LNC_000591	XLOC_052149	antisense_lncRNA	Novel_lncRNA	chr6	62359529	62363640	-	3	2872	166
LNC_000619	XLOC_056968	lincRNA	Novel_lncRNA	chr7	134575725	134618139	-	2	357	94
LNC_000618	XLOC_056698	lincRNA	Novel_lncRNA	chr7	110382529	110390438	-	2	4866	136
LNC_000239	XLOC_018046	lincRNA	Novel_lncRNA	chr12	34078658	34080877	-	2	463	150
LNC_000238	XLOC_017935	lincRNA	Novel_lncRNA	chr12	24077016	24078089	-	2	250	65
LNC_000235	XLOC_017706	lincRNA	Novel_lncRNA	chr12	8807275	8809264	-	2	1123	128
LNC_000234	XLOC_017533	lincRNA	Novel_lncRNA	chr12	62285905	62292255	+	2	2554	167
LNC_000237	XLOC_017801	lincRNA	Novel_lncRNA	chr12	18388424	18391362	-	2	840	118
LNC_000236	XLOC_017801	lincRNA	Novel_lncRNA	chr12	18374244	18391362	-	3	577	118
LNC_000231	XLOC_017386	lincRNA	Novel_lncRNA	chr12	54703484	54704453	+	2	669	99
LNC_000230	XLOC_017208	lincRNA	Novel_lncRNA	chr12	45862789	45865235	+	2	2065	133
LNC_000233	XLOC_017477	lincRNA	Novel_lncRNA	chr12	59274931	59276941	+	2	660	92
LNC_000232	XLOC_017421	antisense_lncRNA	Novel_lncRNA	chr12	55532677	55543566	+	3	821	124
LNC_000597	XLOC_053452	lincRNA	Novel_lncRNA	chr7	13885671	13892094	+	3	4071	121
LNC_000613	XLOC_056242	lincRNA	Novel_lncRNA	chr7	77296686	77898717	-	10	7474	150
LNC_000612	XLOC_056105	lincRNA	Novel_lncRNA	chr7	64096342	64101657	-	2	5144	182
LNC_000679	XLOC_061744	lincRNA	Novel_lncRNA	chr9	152560581	152566802	+	3	4242	153
LNC_000678	XLOC_061703	lincRNA	Novel_lncRNA	chr9	146295896	146299320	+	3	794	88
LNC_000675	XLOC_061631	lincRNA	Novel_lncRNA	chr9	138732172	138736460	+	2	3966	128
LNC_000674	XLOC_061629	lincRNA	Novel_lncRNA	chr9	138217987	138226118	+	2	7978	147
LNC_000677	XLOC_061703	lincRNA	Novel_lncRNA	chr9	146295833	146299320	+	3	845	88
LNC_000676	XLOC_061645	lincRNA	Novel_lncRNA	chr9	140247538	140255195	+	2	282	82
LNC_000671	XLOC_061420	lincRNA	Novel_lncRNA	chr9	116504971	116548915	+	2	3106	136
LNC_000670	XLOC_061414	lincRNA	Novel_lncRNA	chr9	115530603	115537617	+	2	1336	143
LNC_000673	XLOC_061568	lincRNA	Novel_lncRNA	chr9	133245934	133249021	+	3	1020	102
LNC_000616	XLOC_056353	lincRNA	Novel_lncRNA	chr7	81707388	81749870	-	2	456	52
LNC_000048	XLOC_002084	lincRNA	Novel_lncRNA	GL893779.1	2	327	+	2	213	36
LNC_000049	XLOC_002218	lincRNA	Novel_lncRNA	GL893873.1	5565	8733	-	2	203	67
LNC_000046	XLOC_001981	lincRNA	Novel_lncRNA	GL893717.1	16790	22620	-	4	1005	101
LNC_000047	XLOC_001981	lincRNA	Novel_lncRNA	GL893717.1	16790	22620	-	3	1248	101
LNC_000044	XLOC_001981	lincRNA	Novel_lncRNA	GL893717.1	15309	20817	-	3	2483	101
LNC_000045	XLOC_001981	lincRNA	Novel_lncRNA	GL893717.1	16790	20849	-	3	671	93
LNC_000042	XLOC_001662	lincRNA	Novel_lncRNA	GL893509.1	61298	63264	-	2	648	65
LNC_000043	XLOC_001918	lincRNA	Novel_lncRNA	GL893681.1	18779	23292	+	2	1588	172
LNC_000040	XLOC_001315	lincRNA	Novel_lncRNA	GL893267.2	14113	33354	-	2	1436	126
LNC_000041	XLOC_001425	lincRNA	Novel_lncRNA	GL893344.2	46610	49126	+	3	955	114
LNC_000288	XLOC_022688	lincRNA	Novel_lncRNA	chr13	91476506	91478366	-	2	1098	89
LNC_000289	XLOC_022702	lincRNA	Novel_lncRNA	chr13	92339267	92363877	-	2	1138	119
LNC_000123	XLOC_006998	lincRNA	Novel_lncRNA	JH118792.1	37116	46908	-	2	1201	103
LNC_000122	XLOC_006883	lincRNA	Novel_lncRNA	JH118729.1	74880	75509	+	2	527	109
LNC_000125	XLOC_007082	lincRNA	Novel_lncRNA	JH118841.1	146780	152934	-	2	5062	135
LNC_000124	XLOC_007011	lincRNA	Novel_lncRNA	JH118802.1	1813	5043	-	2	2163	120
LNC_000127	XLOC_007130	lincRNA	Novel_lncRNA	JH118868.1	102906	106741	-	2	3726	179
LNC_000126	XLOC_007107	lincRNA	Novel_lncRNA	JH118856.1	52367	56511	-	2	2214	135
LNC_000280	XLOC_022186	lincRNA	Novel_lncRNA	chr13	66322968	66356312	-	3	940	86
LNC_000281	XLOC_022281	lincRNA	Novel_lncRNA	chr13	67090703	67091606	-	2	748	68
LNC_000282	XLOC_022360	lincRNA	Novel_lncRNA	chr13	73091048	73092047	-	2	416	75
LNC_000283	XLOC_022534	lincRNA	Novel_lncRNA	chr13	81624315	81666548	-	2	2160	83
LNC_000284	XLOC_022688	lincRNA	Novel_lncRNA	chr13	91465608	91478366	-	2	2788	127
LNC_000285	XLOC_022688	lincRNA	Novel_lncRNA	chr13	91465608	91478421	-	3	1646	85
LNC_000286	XLOC_022688	lincRNA	Novel_lncRNA	chr13	91465608	91478421	-	3	2038	127
LNC_000287	XLOC_022688	lincRNA	Novel_lncRNA	chr13	91475126	91478421	-	3	1005	89
LNC_000488	XLOC_042238	lincRNA	Novel_lncRNA	chr3	59636076	59639106	-	3	1114	140
LNC_000489	XLOC_042238	lincRNA	Novel_lncRNA	chr3	59636076	59639106	-	3	1111	140
LNC_000486	XLOC_042029	lincRNA	Novel_lncRNA	chr3	43688274	43705151	-	3	4261	158
LNC_000487	XLOC_042055	lincRNA	Novel_lncRNA	chr3	44394727	44397963	-	2	2616	166
LNC_000484	XLOC_041831	antisense_lncRNA	Novel_lncRNA	chr3	32130240	32134616	-	2	696	126
LNC_000485	XLOC_042029	lincRNA	Novel_lncRNA	chr3	43677909	43705151	-	4	4912	224
LNC_000482	XLOC_041482	lincRNA	Novel_lncRNA	chr3	7924660	7925949	-	2	1039	126
LNC_000483	XLOC_041831	antisense_lncRNA	Novel_lncRNA	chr3	32125505	32134616	-	2	4866	134
LNC_000480	XLOC_041332	lincRNA	Novel_lncRNA	chr3	134754845	134756953	+	2	923	277
LNC_000481	XLOC_041440	lincRNA	Novel_lncRNA	chr3	5330720	5342907	-	3	834	79
LNC_000198	XLOC_014167	lincRNA	Novel_lncRNA	chr10	75636977	75648557	+	2	5329	187
LNC_000199	XLOC_014295	lincRNA	Novel_lncRNA	chr10	13676590	13679498	-	2	2689	108
LNC_000194	XLOC_013739	lincRNA	Novel_lncRNA	chr10	45526904	45598863	+	3	1240	150
LNC_000195	XLOC_013780	lincRNA	Novel_lncRNA	chr10	49056074	49165219	+	2	3529	152
LNC_000196	XLOC_013994	antisense_lncRNA	Novel_lncRNA	chr10	61645392	61661391	+	2	1427	93
LNC_000197	XLOC_014163	lincRNA	Novel_lncRNA	chr10	73620055	73628652	+	3	211	69
LNC_000190	XLOC_013398	lincRNA	Novel_lncRNA	chr10	16141752	16176427	+	3	1858	80
LNC_000191	XLOC_013398	lincRNA	Novel_lncRNA	chr10	16172923	16176427	+	3	1884	80
LNC_000192	XLOC_013438	lincRNA	Novel_lncRNA	chr10	21612958	21615651	+	2	762	106
LNC_000193	XLOC_013739	lincRNA	Novel_lncRNA	chr10	45525726	45598863	+	3	1356	150
LNC_000459	XLOC_038868	antisense_lncRNA	Novel_lncRNA	chr2	89169318	89316596	-	3	4157	133
LNC_000458	XLOC_038846	lincRNA	Novel_lncRNA	chr2	86840563	86846538	-	2	3208	146
LNC_000392	XLOC_032821	lincRNA	Novel_lncRNA	chr17	41111755	41115424	+	2	3408	139
LNC_000393	XLOC_032850	lincRNA	Novel_lncRNA	chr17	41941051	41966927	+	2	229	76
LNC_000390	XLOC_032625	lincRNA	Novel_lncRNA	chr17	22546675	22572455	+	5	625	128
LNC_000391	XLOC_032778	antisense_lncRNA	Novel_lncRNA	chr17	38433640	38450275	+	3	11366	192
LNC_000396	XLOC_033130	lincRNA	Novel_lncRNA	chr17	69054821	69056149	+	2	804	164
LNC_000397	XLOC_033369	lincRNA	Novel_lncRNA	chr17	30248244	30249522	-	2	739	59
LNC_000394	XLOC_032920	lincRNA	Novel_lncRNA	chr17	45719144	45721288	+	3	824	75
LNC_000395	XLOC_032993	lincRNA	Novel_lncRNA	chr17	52134596	52136164	+	2	1456	159
LNC_000398	XLOC_033398	lincRNA	Novel_lncRNA	chr17	35133266	35137233	-	3	1062	92
LNC_000399	XLOC_033658	lincRNA	Novel_lncRNA	chr17	51361345	51372195	-	4	858	78
LNC_000415	XLOC_035188	lincRNA	Novel_lncRNA	chr18	41424266	41430748	-	2	3558	103
LNC_000414	XLOC_035087	lincRNA	Novel_lncRNA	chr18	31017702	31038530	-	2	17415	162
LNC_000417	XLOC_035285	lincRNA	Novel_lncRNA	chr18	50106525	50110616	-	2	719	204
LNC_000416	XLOC_035231	lincRNA	Novel_lncRNA	chr18	45670464	45677856	-	2	447	148
LNC_000411	XLOC_034714	lincRNA	Novel_lncRNA	chr18	6216532	6217841	-	2	225	74
LNC_000410	XLOC_034614	lincRNA	Novel_lncRNA	chr18	58197139	58201582	+	2	2767	178
LNC_000413	XLOC_034892	lincRNA	Novel_lncRNA	chr18	16513337	16527832	-	2	12891	185
LNC_000412	XLOC_034809	lincRNA	Novel_lncRNA	chr18	13392851	13393930	-	2	816	163
LNC_000554	XLOC_048611	lincRNA	Novel_lncRNA	chr5	80721756	80722951	-	2	480	49
LNC_000555	XLOC_048662	lincRNA	Novel_lncRNA	chr5	84430478	84470647	-	6	809	211
LNC_000556	XLOC_048671	lincRNA	Novel_lncRNA	chr5	86497293	86498106	-	2	335	106
LNC_000557	XLOC_048705	lincRNA	Novel_lncRNA	chr5	90633911	90650280	-	2	16102	188
LNC_000419	XLOC_035353	lincRNA	Novel_lncRNA	chr18	55874896	55880133	-	2	2233	181
LNC_000418	XLOC_035353	lincRNA	Novel_lncRNA	chr18	55874896	55880133	-	2	2183	152
LNC_000552	XLOC_048409	lincRNA	Novel_lncRNA	chr5	60856356	60865348	-	2	1368	87
LNC_000553	XLOC_048605	lincRNA	Novel_lncRNA	chr5	80133325	80188993	-	3	470	93
LNC_000368	XLOC_030325	lincRNA	Novel_lncRNA	chr15	144173193	144180119	-	2	6824	127
LNC_000457	XLOC_038581	lincRNA	Novel_lncRNA	chr2	71599284	71607362	-	3	631	91
LNC_000456	XLOC_038281	lincRNA	Novel_lncRNA	chr2	53248643	53249074	-	2	313	89
LNC_000309	XLOC_024815	lincRNA	Novel_lncRNA	chr14	58988155	58988872	+	2	453	84
LNC_000308	XLOC_024815	lincRNA	Novel_lncRNA	chr14	58988153	59028142	+	3	4521	106
LNC_000301	XLOC_023771	lincRNA	Novel_lncRNA	chr13	168007788	168041580	-	2	618	156
LNC_000300	XLOC_023710	lincRNA	Novel_lncRNA	chr13	159057051	159067397	-	2	2018	157
LNC_000303	XLOC_024091	antisense_lncRNA	Novel_lncRNA	chr13	216908804	216919234	-	3	8751	307
LNC_000302	XLOC_023979	antisense_lncRNA	Novel_lncRNA	chr13	202429770	202522063	-	4	804	105
LNC_000305	XLOC_024573	lincRNA	Novel_lncRNA	chr14	43136450	43163212	+	2	1678	156
LNC_000304	XLOC_024409	lincRNA	Novel_lncRNA	chr14	37845692	37849960	+	3	2506	117
LNC_000307	XLOC_024645	antisense_lncRNA	Novel_lncRNA	chr14	50285051	50289012	+	4	3155	155
LNC_000306	XLOC_024645	antisense_lncRNA	Novel_lncRNA	chr14	50284838	50289012	+	5	2833	223
LNC_000569	XLOC_049891	lincRNA	Novel_lncRNA	chr6	58040032	58044071	+	2	3953	310
LNC_000568	XLOC_049874	lincRNA	Novel_lncRNA	chr6	57744214	57750902	+	2	6580	183
LNC_000169	XLOC_012064	lincRNA	Novel_lncRNA	chr1	168970852	168979133	-	6	1177	141
LNC_000168	XLOC_012026	lincRNA	Novel_lncRNA	chr1	164773864	164776203	-	2	1265	207
LNC_000165	XLOC_011616	lincRNA	Novel_lncRNA	chr1	122870028	122875871	-	2	706	131
LNC_000164	XLOC_011590	lincRNA	Novel_lncRNA	chr1	119819703	119822808	-	2	705	121
LNC_000167	XLOC_012015	lincRNA	Novel_lncRNA	chr1	163205077	163206501	-	2	769	82
LNC_000166	XLOC_011637	lincRNA	Novel_lncRNA	chr1	126367882	126374197	-	2	775	87
LNC_000161	XLOC_011467	lincRNA	Novel_lncRNA	chr1	106857429	106875143	-	2	9624	103
LNC_000160	XLOC_011359	lincRNA	Novel_lncRNA	chr1	92383462	92384767	-	2	1198	89
LNC_000163	XLOC_011567	lincRNA	Novel_lncRNA	chr1	117518840	117522828	-	2	1487	148
LNC_000162	XLOC_011467	lincRNA	Novel_lncRNA	chr1	106858854	106874991	-	2	15349	119
LNC_000244	XLOC_018490	lincRNA	Novel_lncRNA	chr12	55859345	55862034	-	2	737	91
LNC_000245	XLOC_018619	lincRNA	Novel_lncRNA	chr12	63099070	63102845	-	2	814	194
LNC_000246	XLOC_018793	lincRNA	Novel_lncRNA	chr13	14301019	14311616	+	3	2800	156
LNC_000247	XLOC_018805	lincRNA	Novel_lncRNA	chr13	16542214	16544120	+	2	1020	104
LNC_000240	XLOC_018046	lincRNA	Novel_lncRNA	chr12	34078658	34080911	-	3	719	171
LNC_000241	XLOC_018046	lincRNA	Novel_lncRNA	chr12	34078658	34080911	-	3	693	141
LNC_000242	XLOC_018181	antisense_lncRNA	Novel_lncRNA	chr12	40399196	40496414	-	3	739	136
LNC_000243	XLOC_018224	lincRNA	Novel_lncRNA	chr12	44708298	44709156	-	2	592	190
LNC_000298	XLOC_023560	lincRNA	Novel_lncRNA	chr13	150972725	150976641	-	3	930	103
LNC_000248	XLOC_018879	lincRNA	Novel_lncRNA	chr13	18779935	18791192	+	2	1394	214
LNC_000249	XLOC_019005	lincRNA	Novel_lncRNA	chr13	29402707	29405801	+	2	1675	148
LNC_000428	XLOC_035853	lincRNA	Novel_lncRNA	chr2	23407207	23434558	+	2	24681	198
LNC_000293	XLOC_023278	lincRNA	Novel_lncRNA	chr13	130157154	130163108	-	2	4151	88
LNC_000292	XLOC_022913	antisense_lncRNA	Novel_lncRNA	chr13	109306112	109317704	-	2	5173	146
LNC_000604	XLOC_055029	lincRNA	Novel_lncRNA	chr7	119467462	119473712	+	2	5021	257
LNC_000605	XLOC_055188	lincRNA	Novel_lncRNA	chr7	134694072	134705225	+	2	1471	84
LNC_000606	XLOC_055362	antisense_lncRNA	Novel_lncRNA	chr7	17063658	17106996	-	3	501	77
LNC_000607	XLOC_055362	antisense_lncRNA	Novel_lncRNA	chr7	17084065	17106981	-	2	945	80
LNC_000600	XLOC_053949	antisense_lncRNA	Novel_lncRNA	chr7	36996357	37012199	+	3	7348	262
LNC_000567	XLOC_049623	antisense_lncRNA	Novel_lncRNA	chr6	46364316	46380651	+	2	544	75
LNC_000602	XLOC_054401	lincRNA	Novel_lncRNA	chr7	76463705	76726367	+	9	1115	102
LNC_000603	XLOC_054401	lincRNA	Novel_lncRNA	chr7	76472891	76726367	+	7	1412	134
LNC_000566	XLOC_049545	lincRNA	Novel_lncRNA	chr6	43276475	43277853	+	3	244	80
LNC_000608	XLOC_055441	lincRNA	Novel_lncRNA	chr7	23030400	23051770	-	2	1138	121
LNC_000609	XLOC_055606	lincRNA	Novel_lncRNA	chr7	29200623	29203078	-	2	1443	149
LNC_000011	XLOC_000432	lincRNA	Novel_lncRNA	GL892554.1	797	20574	-	3	2282	132
LNC_000010	XLOC_000406	lincRNA	Novel_lncRNA	GL892541.1	1922	10633	+	2	1812	104
LNC_000013	XLOC_000541	lincRNA	Novel_lncRNA	GL892729.1	58301	80345	-	2	683	147
LNC_000012	XLOC_000432	lincRNA	Novel_lncRNA	GL892554.1	797	20775	-	3	2521	132
LNC_000015	XLOC_000542	lincRNA	Novel_lncRNA	GL892730.2	105290	130089	+	4	617	99
LNC_000014	XLOC_000542	lincRNA	Novel_lncRNA	GL892730.2	105278	128760	+	3	1564	98
LNC_000017	XLOC_000558	lincRNA	Novel_lncRNA	GL892730.2	176354	194744	-	3	1033	87
LNC_000016	XLOC_000542	lincRNA	Novel_lncRNA	GL892730.2	105296	139725	+	3	2875	110
LNC_000019	XLOC_000616	lincRNA	Novel_lncRNA	GL892789.1	93504	94556	+	2	653	137
LNC_000018	XLOC_000558	lincRNA	Novel_lncRNA	GL892730.2	182438	194744	-	2	1305	102
LNC_000668	XLOC_061371	lincRNA	Novel_lncRNA	chr9	111624667	111636957	+	2	12030	118
LNC_000518	XLOC_044773	lincRNA	Novel_lncRNA	chr4	14692249	14707038	-	4	1013	134
LNC_000519	XLOC_045002	lincRNA	Novel_lncRNA	chr4	37179776	37185426	-	2	2560	168
LNC_000510	XLOC_044189	antisense_lncRNA	Novel_lncRNA	chr4	103593869	103597249	+	2	1233	161
LNC_000511	XLOC_044302	antisense_lncRNA	Novel_lncRNA	chr4	109521822	109564602	+	2	2493	176
LNC_000512	XLOC_044351	lincRNA	Novel_lncRNA	chr4	112908416	112920595	+	3	5936	174
LNC_000513	XLOC_044362	lincRNA	Novel_lncRNA	chr4	113357747	113378831	+	2	1847	86
LNC_000514	XLOC_044635	lincRNA	Novel_lncRNA	chr4	142882906	142885793	+	2	2722	161
LNC_000515	XLOC_044635	lincRNA	Novel_lncRNA	chr4	142882970	142885793	+	2	2722	161
LNC_000516	XLOC_044773	lincRNA	Novel_lncRNA	chr4	14676926	14707038	-	3	877	130
LNC_000517	XLOC_044773	lincRNA	Novel_lncRNA	chr4	14692249	14706850	-	3	743	130
LNC_000693	XLOC_062810	lincRNA	Novel_lncRNA	chr9	62427440	62429827	-	2	1678	103
LNC_000692	XLOC_062780	lincRNA	Novel_lncRNA	chr9	61829012	61835572	-	2	6484	186
LNC_000691	XLOC_062773	lincRNA	Novel_lncRNA	chr9	60132841	60142332	-	2	554	80
LNC_000690	XLOC_062752	lincRNA	Novel_lncRNA	chr9	58058599	58066579	-	3	471	61
LNC_000669	XLOC_061391	antisense_lncRNA	Novel_lncRNA	chr9	112961798	113005663	+	2	1342	103
LNC_000696	XLOC_062976	lincRNA	Novel_lncRNA	chr9	80790197	80800417	-	2	856	80
LNC_000695	XLOC_062976	antisense_lncRNA	Novel_lncRNA	chr9	80752216	80800590	-	4	773	82
LNC_000694	XLOC_062904	lincRNA	Novel_lncRNA	chr9	76490963	76543041	-	2	266	88
LNC_000699	XLOC_063320	lincRNA	Novel_lncRNA	chr9	122842540	122844904	-	2	1159	97
LNC_000698	XLOC_063289	lincRNA	Novel_lncRNA	chr9	120083780	120090960	-	2	5589	131
LNC_000508	XLOC_044189	antisense_lncRNA	Novel_lncRNA	chr4	103593810	103597249	+	2	1106	158
LNC_000345	XLOC_027795	lincRNA	Novel_lncRNA	chr15	44818264	44869069	+	2	19722	144
LNC_000344	XLOC_027793	lincRNA	Novel_lncRNA	chr15	44674532	44693040	+	4	1192	95
LNC_000347	XLOC_027994	lincRNA	Novel_lncRNA	chr15	59651264	59702386	+	6	700	112
LNC_000346	XLOC_027798	lincRNA	Novel_lncRNA	chr15	44879757	45177639	+	3	1411	106
LNC_000341	XLOC_027538	lincRNA	Novel_lncRNA	chr15	8406835	8408028	+	2	935	66
LNC_000340	XLOC_027448	lincRNA	Novel_lncRNA	chr14	148133531	148134251	-	2	580	144
LNC_000343	XLOC_027793	lincRNA	Novel_lncRNA	chr15	44674458	44693040	+	3	973	96
LNC_000342	XLOC_027648	lincRNA	Novel_lncRNA	chr15	21529235	21531150	+	2	1636	91
LNC_000464	XLOC_039351	antisense_lncRNA	Novel_lncRNA	chr2	143900619	143901743	-	2	673	133
LNC_000465	XLOC_039359	antisense_lncRNA	Novel_lncRNA	chr2	145674795	145683959	-	2	8235	97
LNC_000466	XLOC_039560	lincRNA	Novel_lncRNA	chr3	39318	42079	+	2	1456	158
LNC_000299	XLOC_023568	lincRNA	Novel_lncRNA	chr13	151333106	151341286	-	3	2175	134
LNC_000349	XLOC_028081	lincRNA	Novel_lncRNA	chr15	73104756	73117574	+	3	1235	117
LNC_000348	XLOC_027994	lincRNA	Novel_lncRNA	chr15	59683245	59710391	+	4	1170	112
LNC_000462	XLOC_039147	lincRNA	Novel_lncRNA	chr2	121588246	121635167	-	2	388	82
LNC_000463	XLOC_039220	lincRNA	Novel_lncRNA	chr2	127956634	127958361	-	2	1543	91
LNC_000200	XLOC_014295	lincRNA	Novel_lncRNA	chr10	13676590	13679657	-	2	2848	108
LNC_000201	XLOC_014437	lincRNA	Novel_lncRNA	chr10	21300404	21301218	-	2	666	60
LNC_000202	XLOC_014661	antisense_lncRNA	Novel_lncRNA	chr10	36167885	36240081	-	3	800	97
LNC_000203	XLOC_014849	lincRNA	Novel_lncRNA	chr10	52901122	52919455	-	2	4060	174
LNC_000204	XLOC_014886	lincRNA	Novel_lncRNA	chr10	55784637	55787441	-	2	790	147
LNC_000205	XLOC_014916	lincRNA	Novel_lncRNA	chr10	56423560	56429265	-	2	5194	112
LNC_000206	XLOC_015100	lincRNA	Novel_lncRNA	chr10	72937838	72941769	-	5	1238	107
LNC_000207	XLOC_015100	lincRNA	Novel_lncRNA	chr10	72937838	72941769	-	4	1540	109
LNC_000208	XLOC_015100	lincRNA	Novel_lncRNA	chr10	72937838	72941769	-	5	1231	107
LNC_000209	XLOC_015236	lincRNA	Novel_lncRNA	chr11	8696426	8697354	+	2	610	93
LNC_000640	XLOC_058475	lincRNA	Novel_lncRNA	chr8	19816935	19819929	-	2	1260	182
LNC_000641	XLOC_058577	lincRNA	Novel_lncRNA	chr8	38812517	38844825	-	3	1354	106
LNC_000642	XLOC_058577	lincRNA	Novel_lncRNA	chr8	38812517	38844825	-	2	1283	106
LNC_000643	XLOC_058577	lincRNA	Novel_lncRNA	chr8	38818800	38844825	-	2	1091	106
LNC_000644	XLOC_058608	lincRNA	Novel_lncRNA	chr8	41137470	41159457	-	4	7961	173
LNC_000645	XLOC_058612	lincRNA	Novel_lncRNA	chr8	41576829	41609745	-	3	1539	86
LNC_000646	XLOC_058612	lincRNA	Novel_lncRNA	chr8	41583141	41613686	-	4	751	85
LNC_000647	XLOC_058723	lincRNA	Novel_lncRNA	chr8	58237753	58244213	-	2	1713	179
LNC_000648	XLOC_059003	lincRNA	Novel_lncRNA	chr8	78462479	78470385	-	2	7128	155
LNC_000649	XLOC_059005	lincRNA	Novel_lncRNA	chr8	78488932	78543935	-	3	4593	166
LNC_000059	XLOC_002460	lincRNA	Novel_lncRNA	GL894015.1	8659	12502	-	4	678	85
LNC_000058	XLOC_002460	lincRNA	Novel_lncRNA	GL894015.1	8659	12141	-	4	319	85
LNC_000055	XLOC_002318	lincRNA	Novel_lncRNA	GL893935.1	69747	81727	-	4	1932	105
LNC_000054	XLOC_002309	lincRNA	Novel_lncRNA	GL893932.1	27119	27536	+	2	346	77
LNC_000057	XLOC_002406	lincRNA	Novel_lncRNA	GL893970.1	25295	38329	+	2	620	102
LNC_000056	XLOC_002360	lincRNA	Novel_lncRNA	GL893955.2	5710	11761	-	2	3916	108
LNC_000051	XLOC_002265	antisense_lncRNA	Novel_lncRNA	GL893900.2	62728	78581	-	2	406	100
LNC_000050	XLOC_002221	lincRNA	Novel_lncRNA	GL893873.1	16851	17491	-	2	255	85
LNC_000053	XLOC_002306	lincRNA	Novel_lncRNA	GL893932.1	22691	25117	+	2	2366	132
LNC_000052	XLOC_002276	lincRNA	Novel_lncRNA	GL893906.1	39213	40715	-	2	1431	89
LNC_000114	XLOC_005975	lincRNA	Novel_lncRNA	GL896503.1	12847	21235	-	3	1378	170
LNC_000115	XLOC_006011	lincRNA	Novel_lncRNA	GL896509.1	52297	63225	-	2	519	66
LNC_000116	XLOC_006077	lincRNA	Novel_lncRNA	GL896538.1	10111	13645	-	3	231	77
LNC_000117	XLOC_006136	lincRNA	Novel_lncRNA	JH118407.1	64434	65595	-	2	1087	81
LNC_000110	XLOC_005787	lincRNA	Novel_lncRNA	GL896424.1	5343	7040	+	2	1637	83
LNC_000111	XLOC_005787	lincRNA	Novel_lncRNA	GL896424.1	5343	7040	+	2	1637	83
LNC_000112	XLOC_005801	lincRNA	Novel_lncRNA	GL896427.1	800	2980	-	3	1240	155
LNC_000113	XLOC_005804	lincRNA	Novel_lncRNA	GL896427.1	4364	5536	-	2	1091	150
LNC_000297	XLOC_023539	lincRNA	Novel_lncRNA	chr13	148763163	148764037	-	2	712	97
LNC_000296	XLOC_023490	lincRNA	Novel_lncRNA	chr13	145926097	145968410	-	2	1361	103
LNC_000295	XLOC_023435	lincRNA	Novel_lncRNA	chr13	143407383	143408378	-	2	609	74
LNC_000294	XLOC_023409	lincRNA	Novel_lncRNA	chr13	140341061	140351704	-	3	895	87
LNC_000118	XLOC_006559	lincRNA	Novel_lncRNA	JH118583.1	30620	48055	+	2	770	120
LNC_000119	XLOC_006607	lincRNA	Novel_lncRNA	JH118613.1	137447	143003	+	2	1863	74
LNC_000291	XLOC_022723	lincRNA	Novel_lncRNA	chr13	97576840	97578261	-	3	956	125
LNC_000290	XLOC_022723	lincRNA	Novel_lncRNA	chr13	97564984	97578261	-	4	1635	156
LNC_000660	XLOC_060274	lincRNA	Novel_lncRNA	chr9	23596964	23599160	+	2	1089	66
LNC_000499	XLOC_043210	lincRNA	Novel_lncRNA	chr3	142377006	142383224	-	2	1070	192
LNC_000498	XLOC_043103	antisense_lncRNA	Novel_lncRNA	chr3	127277850	127542506	-	5	563	92
LNC_000495	XLOC_042990	lincRNA	Novel_lncRNA	chr3	118019468	118023239	-	2	3471	112
LNC_000494	XLOC_042722	lincRNA	Novel_lncRNA	chr3	97670171	97685404	-	2	835	113
LNC_000497	XLOC_043103	antisense_lncRNA	Novel_lncRNA	chr3	127048691	127542506	-	6	1400	92
LNC_000496	XLOC_043025	lincRNA	Novel_lncRNA	chr3	119002372	119004951	-	2	1690	125
LNC_000491	XLOC_042437	lincRNA	Novel_lncRNA	chr3	71012819	71027589	-	2	349	115
LNC_000490	XLOC_042239	antisense_lncRNA	Novel_lncRNA	chr3	59668466	59685349	-	2	1347	113
LNC_000493	XLOC_042722	antisense_lncRNA	Novel_lncRNA	chr3	97535451	97547603	-	3	1601	73
LNC_000492	XLOC_042437	lincRNA	Novel_lncRNA	chr3	71020957	71027586	-	2	366	121
LNC_000661	XLOC_060382	lincRNA	Novel_lncRNA	chr9	36156723	36158909	+	2	1231	88
LNC_000152	XLOC_010480	lincRNA	Novel_lncRNA	chr1	307554029	307557169	+	2	2416	235
LNC_000183	XLOC_013182	lincRNA	Novel_lncRNA	chr1	307529826	307530882	-	2	831	123
LNC_000182	XLOC_013175	lincRNA	Novel_lncRNA	chr1	307068190	307069865	-	3	1301	206
LNC_000181	XLOC_013175	lincRNA	Novel_lncRNA	chr1	307068190	307069865	-	3	1304	207
LNC_000180	XLOC_013175	lincRNA	Novel_lncRNA	chr1	307068190	307069865	-	3	919	174
LNC_000187	XLOC_013397	lincRNA	Novel_lncRNA	chr10	16088703	16096050	+	2	2365	155
LNC_000186	XLOC_013380	lincRNA	Novel_lncRNA	chr10	15197757	15215504	+	2	2386	130
LNC_000185	XLOC_013376	lincRNA	Novel_lncRNA	chr10	15131650	15133068	+	2	1265	93
LNC_000184	XLOC_013310	lincRNA	Novel_lncRNA	chr10	3320134	3436447	+	5	1279	107
LNC_000189	XLOC_013398	lincRNA	Novel_lncRNA	chr10	16141711	16144203	+	2	1599	103
LNC_000188	XLOC_013397	lincRNA	Novel_lncRNA	chr10	16091726	16096050	+	2	2322	155
LNC_000601	XLOC_054315	lincRNA	Novel_lncRNA	chr7	67657025	67657980	+	2	835	212
LNC_000381	XLOC_031589	antisense_lncRNA	Novel_lncRNA	chr16	34186618	34195138	-	3	741	82
LNC_000380	XLOC_031522	lincRNA	Novel_lncRNA	chr16	27575547	27693883	-	3	847	93
LNC_000383	XLOC_031893	lincRNA	Novel_lncRNA	chr16	42306678	42318363	-	2	1789	229
LNC_000382	XLOC_031792	lincRNA	Novel_lncRNA	chr16	41617926	41620817	-	2	2745	94
LNC_000385	XLOC_032394	lincRNA	Novel_lncRNA	chr16	75775736	75817340	-	2	1567	91
LNC_000384	XLOC_031951	lincRNA	Novel_lncRNA	chr16	48537824	48546487	-	2	2481	94
LNC_000387	XLOC_032565	antisense_lncRNA	Novel_lncRNA	chr17	16013140	16013923	+	3	562	126
LNC_000386	XLOC_032394	lincRNA	Novel_lncRNA	chr16	75775736	75817423	-	3	1723	91
LNC_000389	XLOC_032625	lincRNA	Novel_lncRNA	chr17	22546658	22572455	+	4	534	92
LNC_000388	XLOC_032584	lincRNA	Novel_lncRNA	chr17	18783305	18784664	+	2	1002	108
LNC_000422	XLOC_035581	lincRNA	Novel_lncRNA	chr2	5801459	5803252	+	2	1690	97
LNC_000423	XLOC_035710	lincRNA	Novel_lncRNA	chr2	11892718	11898548	+	2	1639	158
LNC_000424	XLOC_035710	antisense_lncRNA	Novel_lncRNA	chr2	11892718	11914561	+	2	744	158
LNC_000425	XLOC_035798	lincRNA	Novel_lncRNA	chr2	17776185	17783057	+	2	6728	132
LNC_000426	XLOC_035853	lincRNA	Novel_lncRNA	chr2	23407197	23507936	+	2	17233	198
LNC_000427	XLOC_035853	lincRNA	Novel_lncRNA	chr2	23407197	23507936	+	4	16769	194
LNC_000543	XLOC_047043	lincRNA	Novel_lncRNA	chr5	67994636	68000841	+	2	5736	123
LNC_000542	XLOC_047020	antisense_lncRNA	Novel_lncRNA	chr5	66659014	66660943	+	2	1556	137
LNC_000541	XLOC_046959	lincRNA	Novel_lncRNA	chr5	63826618	63834197	+	3	2210	181
LNC_000540	XLOC_046959	lincRNA	Novel_lncRNA	chr5	63826487	63834197	+	2	1896	166
LNC_000547	XLOC_047285	antisense_lncRNA	Novel_lncRNA	chr5	81339223	81343247	+	2	2327	313
LNC_000546	XLOC_047134	lincRNA	Novel_lncRNA	chr5	71722115	71729751	+	2	6008	295
LNC_000545	XLOC_047051	lincRNA	Novel_lncRNA	chr5	69482180	69487530	+	2	755	84
LNC_000544	XLOC_047043	lincRNA	Novel_lncRNA	chr5	67994656	68000841	+	2	5806	123
LNC_000697	XLOC_063071	lincRNA	Novel_lncRNA	chr9	94146388	94150327	-	2	1902	129
LNC_000549	XLOC_047561	lincRNA	Novel_lncRNA	chr5	1284078	1294192	-	2	1191	124
LNC_000548	XLOC_047378	lincRNA	Novel_lncRNA	chr5	91441985	91444157	+	2	1317	76
LNC_000448	XLOC_037118	lincRNA	Novel_lncRNA	chr2	128987017	129008960	+	2	336	87
LNC_000449	XLOC_037118	lincRNA	Novel_lncRNA	chr2	128987017	129056433	+	4	446	87
LNC_000672	XLOC_061432	lincRNA	Novel_lncRNA	chr9	117723729	117724307	+	2	393	71
LNC_000338	XLOC_027237	lincRNA	Novel_lncRNA	chr14	119049377	119052290	-	2	751	213
LNC_000339	XLOC_027429	lincRNA	Novel_lncRNA	chr14	147283469	147290621	-	2	6540	134
LNC_000334	XLOC_027016	lincRNA	Novel_lncRNA	chr14	104960204	105131342	-	5	919	118
LNC_000335	XLOC_027062	lincRNA	Novel_lncRNA	chr14	105564624	105567262	-	2	2073	93
LNC_000336	XLOC_027096	lincRNA	Novel_lncRNA	chr14	107015343	107028214	-	2	7649	97
LNC_000337	XLOC_027145	lincRNA	Novel_lncRNA	chr14	108498806	108506964	-	3	1860	91
LNC_000330	XLOC_027014	lincRNA	Novel_lncRNA	chr14	104921027	104930544	-	4	3135	106
LNC_000331	XLOC_027015	lincRNA	Novel_lncRNA	chr14	104930939	104933819	-	2	1601	83
LNC_000332	XLOC_027015	lincRNA	Novel_lncRNA	chr14	104930939	104942620	-	4	1341	83
LNC_000333	XLOC_027016	lincRNA	Novel_lncRNA	chr14	104948206	105131342	-	6	556	90
LNC_000440	XLOC_036815	lincRNA	Novel_lncRNA	chr2	98350579	98419432	+	2	1784	96
LNC_000441	XLOC_036841	lincRNA	Novel_lncRNA	chr2	104541790	104607361	+	3	2347	80
LNC_000150	XLOC_010160	lincRNA	Novel_lncRNA	chr1	278334557	278339142	+	2	614	124
LNC_000151	XLOC_010206	lincRNA	Novel_lncRNA	chr1	283177141	283179398	+	2	2115	125
LNC_000259	XLOC_019997	lincRNA	Novel_lncRNA	chr13	115625842	115629003	+	2	1060	142
LNC_000153	XLOC_010910	lincRNA	Novel_lncRNA	chr1	26960911	26963975	-	2	2965	81
LNC_000154	XLOC_011021	lincRNA	Novel_lncRNA	chr1	39601900	39602385	-	2	248	82
LNC_000155	XLOC_011129	lincRNA	Novel_lncRNA	chr1	60436312	60443757	-	4	548	107
LNC_000156	XLOC_011323	lincRNA	Novel_lncRNA	chr1	89784929	89848969	-	5	2749	152
LNC_000157	XLOC_011323	lincRNA	Novel_lncRNA	chr1	89808242	89848969	-	3	573	164
LNC_000158	XLOC_011323	lincRNA	Novel_lncRNA	chr1	89845335	89848969	-	3	1084	152
LNC_000159	XLOC_011323	lincRNA	Novel_lncRNA	chr1	89847699	89848969	-	2	775	156
LNC_000251	XLOC_019278	antisense_lncRNA	Novel_lncRNA	chr13	44292969	44440780	+	2	1721	128
LNC_000250	XLOC_019043	lincRNA	Novel_lncRNA	chr13	31646763	31647961	+	2	613	191
LNC_000257	XLOC_019654	lincRNA	Novel_lncRNA	chr13	80962603	80965071	+	2	2418	94
LNC_000256	XLOC_019650	antisense_lncRNA	Novel_lncRNA	chr13	80926708	80946958	+	3	855	131
LNC_000255	XLOC_019511	antisense_lncRNA	Novel_lncRNA	chr13	73209790	73219929	+	3	500	123
LNC_000254	XLOC_019446	lincRNA	Novel_lncRNA	chr13	58367772	58385903	+	2	5071	97
LNC_000704	XLOC_064167	lincRNA	Novel_lncRNA	chrX	98065197	98066310	+	2	607	100
LNC_000590	XLOC_052149	antisense_lncRNA	Novel_lncRNA	chr6	62359529	62363640	-	2	3437	208
LNC_000121	XLOC_006760	lincRNA	Novel_lncRNA	JH118694.1	27067	28286	-	2	1057	146
LNC_000592	XLOC_052149	antisense_lncRNA	Novel_lncRNA	chr6	62359529	62363640	-	3	2870	169
LNC_000593	XLOC_052616	lincRNA	Novel_lncRNA	chr6	93142432	93151598	-	3	1553	76
LNC_000594	XLOC_052914	lincRNA	Novel_lncRNA	chr6	135921053	135927996	-	2	6490	127
LNC_000595	XLOC_053103	lincRNA	Novel_lncRNA	chr6	144714694	144971551	-	3	3676	113
LNC_000596	XLOC_053325	lincRNA	Novel_lncRNA	chr7	1629104	1631851	+	2	1462	239
LNC_000120	XLOC_006760	lincRNA	Novel_lncRNA	JH118694.1	27067	28014	-	2	737	143
LNC_000598	XLOC_053917	lincRNA	Novel_lncRNA	chr7	33226761	33227236	+	2	381	86
LNC_000599	XLOC_053949	antisense_lncRNA	Novel_lncRNA	chr7	36989658	37012199	+	6	6807	215
LNC_000611	XLOC_056021	lincRNA	Novel_lncRNA	chr7	59628778	59630768	-	3	1263	113
LNC_000610	XLOC_056021	lincRNA	Novel_lncRNA	chr7	59628778	59630736	-	2	1146	99
LNC_000617	XLOC_056479	lincRNA	Novel_lncRNA	chr7	89873027	89912996	-	2	2292	115
LNC_000578	XLOC_051065	lincRNA	Novel_lncRNA	chr6	151748439	151749416	+	2	845	149
LNC_000615	XLOC_056263	lincRNA	Novel_lncRNA	chr7	77577741	77583505	-	2	1383	87
LNC_000614	XLOC_056242	lincRNA	Novel_lncRNA	chr7	77571688	77898671	-	6	774	64
LNC_000579	XLOC_051199	lincRNA	Novel_lncRNA	chr6	1560876	1564466	-	2	897	189
LNC_000702	XLOC_063537	lincRNA	Novel_lncRNA	chr9	146668246	146670643	-	3	744	99
LNC_000024	XLOC_000711	lincRNA	Novel_lncRNA	GL892881.1	9155	20279	-	3	244	81
LNC_000025	XLOC_000835	lincRNA	Novel_lncRNA	GL892959.1	117748	119016	+	2	826	146
LNC_000026	XLOC_000846	lincRNA	Novel_lncRNA	GL892961.2	30576	34366	-	2	667	122
LNC_000027	XLOC_000860	lincRNA	Novel_lncRNA	GL892995.2	37113	41317	+	2	1037	107
LNC_000020	XLOC_000649	lincRNA	Novel_lncRNA	GL892808.2	165562	167322	-	2	1705	95
LNC_000021	XLOC_000657	antisense_lncRNA	Novel_lncRNA	GL892813.1	31046	38710	+	3	499	87
LNC_000022	XLOC_000657	antisense_lncRNA	Novel_lncRNA	GL892813.1	33201	38710	+	4	624	119
LNC_000023	XLOC_000657	antisense_lncRNA	Novel_lncRNA	GL892813.1	34619	38710	+	3	973	138
LNC_000028	XLOC_000869	lincRNA	Novel_lncRNA	GL893000.2	190934	202497	+	2	1182	109
LNC_000029	XLOC_000869	lincRNA	Novel_lncRNA	GL893000.2	190934	202497	+	2	1129	109
LNC_000129	XLOC_007209	lincRNA	Novel_lncRNA	JH118909.1	649	1664	+	2	436	99
LNC_000128	XLOC_007156	lincRNA	Novel_lncRNA	JH118878.1	63	44698	+	3	1307	102
LNC_000570	XLOC_049944	lincRNA	Novel_lncRNA	chr6	63146067	63150367	+	2	537	96
LNC_000571	XLOC_050034	lincRNA	Novel_lncRNA	chr6	68806045	68816039	+	2	467	78
LNC_000178	XLOC_012996	lincRNA	Novel_lncRNA	chr1	293395208	293401531	-	2	4229	204
LNC_000179	XLOC_012996	lincRNA	Novel_lncRNA	chr1	293414014	293417964	-	2	3730	162
LNC_000253	XLOC_019319	lincRNA	Novel_lncRNA	chr13	49987797	49992863	+	2	4982	109
LNC_000420	XLOC_035361	lincRNA	Novel_lncRNA	chr18	57311227	57320420	-	3	1022	115
LNC_000509	XLOC_044189	antisense_lncRNA	Novel_lncRNA	chr4	103593840	103597249	+	2	1130	176
LNC_000421	XLOC_035361	lincRNA	Novel_lncRNA	chr18	57317132	57320420	-	2	793	118
LNC_000507	XLOC_044018	lincRNA	Novel_lncRNA	chr4	94907120	94959648	+	2	624	121
LNC_000506	XLOC_043520	lincRNA	Novel_lncRNA	chr4	32448575	32483859	+	2	4184	88
LNC_000505	XLOC_043479	lincRNA	Novel_lncRNA	chr4	23457915	23473890	+	2	15681	137
LNC_000504	XLOC_043451	lincRNA	Novel_lncRNA	chr4	21616260	21763800	+	3	10391	161
LNC_000503	XLOC_043378	lincRNA	Novel_lncRNA	chr4	12535422	12555210	+	2	2166	120
LNC_000502	XLOC_043305	lincRNA	Novel_lncRNA	chr4	7158378	7171812	+	3	876	162
LNC_000501	XLOC_043297	lincRNA	Novel_lncRNA	chr4	6733973	6767670	+	2	1354	95
LNC_000500	XLOC_043210	lincRNA	Novel_lncRNA	chr3	142377737	142383209	-	2	666	190
LNC_000252	XLOC_019296	lincRNA	Novel_lncRNA	chr13	47279571	47281512	+	2	1323	79
LNC_000170	XLOC_012197	antisense_lncRNA	Novel_lncRNA	chr1	185297089	185302480	-	2	4792	136
LNC_000171	XLOC_012284	antisense_lncRNA	Novel_lncRNA	chr1	200589525	200589942	-	2	208	69
LNC_000378	XLOC_031063	lincRNA	Novel_lncRNA	chr16	54996847	55010912	+	3	1672	170
LNC_000379	XLOC_031383	lincRNA	Novel_lncRNA	chr16	1227	16045	-	2	8361	263
LNC_000370	XLOC_030433	lincRNA	Novel_lncRNA	chr15	152578678	152586074	-	2	951	194
LNC_000371	XLOC_030728	lincRNA	Novel_lncRNA	chr16	28550928	28568666	+	4	1050	117
LNC_000372	XLOC_030750	lincRNA	Novel_lncRNA	chr16	29565725	29568312	+	2	585	70
LNC_000373	XLOC_030802	lincRNA	Novel_lncRNA	chr16	39410530	39427514	+	4	384	103
LNC_000374	XLOC_030871	lincRNA	Novel_lncRNA	chr16	43779881	43783898	+	2	638	69
LNC_000375	XLOC_030902	lincRNA	Novel_lncRNA	chr16	48015269	48017843	+	3	2286	154
LNC_000376	XLOC_030902	lincRNA	Novel_lncRNA	chr16	48015269	48054003	+	4	982	118
LNC_000377	XLOC_031063	lincRNA	Novel_lncRNA	chr16	54996847	54998394	+	3	1044	78
LNC_000473	XLOC_040502	lincRNA	Novel_lncRNA	chr3	56282668	56285163	+	3	1827	172
LNC_000472	XLOC_040308	lincRNA	Novel_lncRNA	chr3	41416361	41418137	+	3	947	169
LNC_000471	XLOC_040089	lincRNA	Novel_lncRNA	chr3	24932511	24973317	+	3	1088	77
LNC_000470	XLOC_039872	lincRNA	Novel_lncRNA	chr3	14111131	14114213	+	2	2914	107
LNC_000477	XLOC_041091	lincRNA	Novel_lncRNA	chr3	113107163	113138717	+	2	745	86
LNC_000476	XLOC_041091	lincRNA	Novel_lncRNA	chr3	113107163	113129244	+	2	406	82
LNC_000475	XLOC_040756	lincRNA	Novel_lncRNA	chr3	79093028	79095286	+	3	1328	163
LNC_000474	XLOC_040554	antisense_lncRNA	Novel_lncRNA	chr3	59746053	59751174	+	2	2527	170
LNC_000572	XLOC_050148	lincRNA	Novel_lncRNA	chr6	77305658	77306636	+	2	893	88
LNC_000573	XLOC_050169	lincRNA	Novel_lncRNA	chr6	78289523	78299394	+	2	1781	179
LNC_000479	XLOC_041158	lincRNA	Novel_lncRNA	chr3	117459355	117476675	+	3	1159	124
LNC_000478	XLOC_041103	lincRNA	Novel_lncRNA	chr3	113507167	113516090	+	2	7296	155
LNC_000576	XLOC_050540	lincRNA	Novel_lncRNA	chr6	125049704	125158713	+	5	683	74
LNC_000577	XLOC_050744	lincRNA	Novel_lncRNA	chr6	141116213	141124418	+	2	871	124
LNC_000574	XLOC_050373	lincRNA	Novel_lncRNA	chr6	93932017	93933685	+	2	1054	92
LNC_000575	XLOC_050422	lincRNA	Novel_lncRNA	chr6	99566152	99579133	+	2	880	205
Annotated_lncRNA_ID	Annotated_lncRNA_Gene_ID	Annotated_lncRNA_Gene_Name	Annotated_lncRNA_Gene_Description	Gene_Type	Status	Chromosome	Start	End	Strand	Exon_number	Length	ORF
ALDBSSCT0000004214	ALDBSSCG0000002548	--	--	lincRNA	Annotated_lncRNA	chr15	75585084	75626448	+	4	755	208
ALDBSSCT0000009170	ALDBSSCG0000005589	--	--	lincRNA	Annotated_lncRNA	chr6	154790935	154792409	+	2	1211	146
ALDBSSCT0000008462	ALDBSSCG0000005142	--	--	lincRNA	Annotated_lncRNA	chr5	105368795	105397053	+	6	919	79
ALDBSSCT0000007483	ALDBSSCG0000004537	--	--	lincRNA	Annotated_lncRNA	chr4	21883404	21888554	+	2	2984	111
ALDBSSCT0000005782	ALDBSSCG0000003513	--	--	lincRNA	Annotated_lncRNA	chr2	4448046	4450437	+	2	300	56
ALDBSSCT0000008467	ALDBSSCG0000005144	--	--	lincRNA	Annotated_lncRNA	chr5	106499744	106501189	+	2	1440	78
ALDBSSCT0000007482	ALDBSSCG0000004536	--	--	lincRNA	Annotated_lncRNA	chr4	21846600	21851209	+	2	1963	138
ALDBSSCT0000005422	ALDBSSCG0000003281	--	--	lincRNA	Annotated_lncRNA	chr17	69072961	69075017	-	2	1271	109
ALDBSSCT0000001128	ALDBSSCG0000000701	--	--	lincRNA	Annotated_lncRNA	chr10	14062764	14065076	+	3	1270	96
ALDBSSCT0000005132	ALDBSSCG0000003088	--	--	lincRNA	Annotated_lncRNA	chr17	16315809	16336824	+	3	1200	116
ALDBSSCT0000005130	ALDBSSCG0000003087	--	--	lincRNA	Annotated_lncRNA	chr17	14918576	14933366	+	2	385	108
ALDBSSCT0000009198	ALDBSSCG0000005602	--	--	lincRNA	Annotated_lncRNA	chr6	2681102	2688091	-	2	6637	295
ALDBSSCT0000010371	ALDBSSCG0000006299	--	--	lincRNA	Annotated_lncRNA	chr7	132145816	132164645	-	5	1251	140
ALDBSSCT0000011567	ALDBSSCG0000007022	--	--	lincRNA	Annotated_lncRNA	chr9	63784783	63785630	-	2	723	123
ALDBSSCT0000011407	ALDBSSCG0000006936	--	--	lincRNA	Annotated_lncRNA	chr9	3630455	3656750	-	2	372	59
ALDBSSCT0000001049	ALDBSSCG0000000650	--	--	lincRNA	Annotated_lncRNA	chr1	293388718	293419671	-	3	943	169
ALDBSSCT0000001048	ALDBSSCG0000000649	--	--	lincRNA	Annotated_lncRNA	chr1	293271844	293275226	-	2	2959	133
ALDBSSCT0000001124	ALDBSSCG0000000697	--	--	lincRNA	Annotated_lncRNA	chr10	11930984	11931694	+	2	619	131
ALDBSSCT0000001179	ALDBSSCG0000000730	--	--	lincRNA	Annotated_lncRNA	chr10	31316717	31319631	+	2	2807	171
ALDBSSCT0000001822	ALDBSSCG0000001099	--	--	lincRNA	Annotated_lncRNA	chr11	81201065	81206803	+	2	764	123
ALDBSSCT0000009903	ALDBSSCG0000006026	--	--	lincRNA	Annotated_lncRNA	chr7	105420591	105421475	+	3	873	78
ALDBSSCT0000007327	ALDBSSCG0000004449	--	--	lincRNA	Annotated_lncRNA	chr3	121802236	121807330	-	2	691	60
ALDBSSCT0000007320	ALDBSSCG0000004445	--	--	lincRNA	Annotated_lncRNA	chr3	119393277	119395476	-	2	1356	117
ALDBSSCT0000008789	ALDBSSCG0000005368	--	--	lincRNA	Annotated_lncRNA	chr6	30794210	30795667	+	2	696	214
ALDBSSCT0000006536	ALDBSSCG0000003996	--	--	lincRNA	Annotated_lncRNA	chr3	5383663	5410016	+	2	1598	179
ENSSSCT00000034557	ENSSSCG00000004334	MAP3K7	-	processed_transcript	Annotated_lncRNA	chr1	65524234	65542600	-	4	1295	174
ALDBSSCT0000009393	ALDBSSCG0000005727	--	--	lincRNA	Annotated_lncRNA	chr6	62967916	62978408	-	2	346	87
ALDBSSCT0000007132	ALDBSSCG0000004337	--	--	lincRNA	Annotated_lncRNA	chr3	44891244	44910629	-	2	977	107
ALDBSSCT0000007328	ALDBSSCG0000004450	--	--	lincRNA	Annotated_lncRNA	chr3	121968850	121979173	-	2	315	104
ALDBSSCT0000009394	ALDBSSCG0000005728	--	--	lincRNA	Annotated_lncRNA	chr6	63340090	63342611	-	2	2143	113
ALDBSSCT0000009010	ALDBSSCG0000005505	--	--	lincRNA	Annotated_lncRNA	chr6	94633474	94724597	+	2	394	76
ALDBSSCT0000009547	ALDBSSCG0000005820	--	--	lincRNA	Annotated_lncRNA	chr6	140989905	140994109	-	3	580	141
ALDBSSCT0000009544	ALDBSSCG0000005818	--	--	lincRNA	Annotated_lncRNA	chr6	138277258	138280148	-	2	342	91
ALDBSSCT0000011715	ALDBSSCG0000007110	--	--	lincRNA	Annotated_lncRNA	chr9	135731074	135742373	-	2	1319	163
ALDBSSCT0000003242	ALDBSSCG0000001953	--	--	lincRNA	Annotated_lncRNA	chr13	108847807	108853885	-	2	4472	153
ALDBSSCT0000000232	ALDBSSCG0000000133	--	--	lincRNA	Annotated_lncRNA	chr1	117531973	117628107	+	2	1259	102
ALDBSSCT0000008015	ALDBSSCG0000004861	--	--	lincRNA	Annotated_lncRNA	chr4	83692399	83694744	-	2	1632	97
ALDBSSCT0000006986	ALDBSSCG0000004241	--	--	lincRNA	Annotated_lncRNA	chr3	853574	862528	-	2	394	131
ALDBSSCT0000004352	ALDBSSCG0000002638	--	--	lincRNA	Annotated_lncRNA	chr15	147200874	147223254	+	3	939	86
ALDBSSCT0000000234	ALDBSSCG0000000134	--	--	lincRNA	Annotated_lncRNA	chr1	117937355	117941237	+	2	327	108
ALDBSSCT0000005553	ALDBSSCG0000003361	--	--	lincRNA	Annotated_lncRNA	chr18	50987038	50991384	+	4	1154	110
ALDBSSCT0000007106	ALDBSSCG0000004322	--	--	lincRNA	Annotated_lncRNA	chr3	38938179	38940065	-	2	1330	172
ALDBSSCT0000011084	ALDBSSCG0000006726	--	--	lincRNA	Annotated_lncRNA	chr9	10966570	10971281	+	2	463	153
ALDBSSCT0000007631	ALDBSSCG0000004628	--	--	lincRNA	Annotated_lncRNA	chr4	96968371	96968722	+	2	253	63
ENSSSCT00000033052	ENSSSCG00000031028	CH242-15C8.2	-	lincRNA	Annotated_lncRNA	chrX	41061659	41063153	+	1	1495	101
ALDBSSCT0000007736	ALDBSSCG0000004698	--	--	lincRNA	Annotated_lncRNA	chr4	136746877	136747686	+	2	494	55
ALDBSSCT0000008986	ALDBSSCG0000005499	--	--	lincRNA	Annotated_lncRNA	chr6	93471011	93472913	+	2	1416	110
ALDBSSCT0000011804	ALDBSSCG0000007163	--	--	lincRNA	Annotated_lncRNA	GL893006.1	27220	28222	+	2	904	96
ALDBSSCT0000007639	ALDBSSCG0000004635	--	--	lincRNA	Annotated_lncRNA	chr4	100769977	100782327	+	3	329	85
ALDBSSCT0000003527	ALDBSSCG0000002119	--	--	lincRNA	Annotated_lncRNA	chr14	32692173	32701044	+	8	2155	131
ALDBSSCT0000008137	ALDBSSCG0000004938	--	--	lincRNA	Annotated_lncRNA	chr4	121890250	121897830	-	3	4585	126
ALDBSSCT0000011316	ALDBSSCG0000006873	--	--	lincRNA	Annotated_lncRNA	chr9	128650281	128651905	+	2	448	75
ALDBSSCT0000003523	ALDBSSCG0000002119	--	--	lincRNA	Annotated_lncRNA	chr14	32691796	32701044	+	5	3369	131
ALDBSSCT0000000891	ALDBSSCG0000000540	--	--	lincRNA	Annotated_lncRNA	chr1	179547039	179571779	-	4	487	122
ALDBSSCT0000006599	ALDBSSCG0000004033	--	--	lincRNA	Annotated_lncRNA	chr3	23545045	23547532	+	2	2345	96
ENSSSCT00000016939	ENSSSCG00000015549	RNASEL	-	processed_transcript	Annotated_lncRNA	chr9	136210073	136224410	-	8	2720	774
ALDBSSCT0000011318	ALDBSSCG0000006875	--	--	lincRNA	Annotated_lncRNA	chr9	128989051	128992233	+	3	697	114
ALDBSSCT0000008469	ALDBSSCG0000005146	--	--	lincRNA	Annotated_lncRNA	chr5	106735870	106742875	+	2	2154	111
ALDBSSCT0000003134	ALDBSSCG0000001881	--	--	lincRNA	Annotated_lncRNA	chr13	46846300	46973997	-	3	373	120
ALDBSSCT0000003529	ALDBSSCG0000002119	--	--	lincRNA	Annotated_lncRNA	chr14	32693620	32701044	+	6	1863	131
ALDBSSCT0000004812	ALDBSSCG0000002924	--	--	lincRNA	Annotated_lncRNA	chr16	56277315	56331424	+	2	566	188
ALDBSSCT0000009908	ALDBSSCG0000006029	--	--	lincRNA	Annotated_lncRNA	chr7	106107725	106112169	+	3	3634	183
ALDBSSCT0000009749	ALDBSSCG0000005948	--	--	lincRNA	Annotated_lncRNA	chr7	44057391	44076573	+	3	230	76
ALDBSSCT0000003003	ALDBSSCG0000001800	--	--	lincRNA	Annotated_lncRNA	chr13	208453602	208456395	+	2	2671	131
ALDBSSCT0000006049	ALDBSSCG0000003703	--	--	lincRNA	Annotated_lncRNA	chr2	142664365	142665527	+	2	247	74
ALDBSSCT0000006047	ALDBSSCG0000003702	--	--	lincRNA	Annotated_lncRNA	chr2	142447471	142462284	+	3	3539	187
ALDBSSCT0000006044	ALDBSSCG0000003700	--	--	lincRNA	Annotated_lncRNA	chr2	141419869	141476871	+	3	394	131
ALDBSSCT0000000804	ALDBSSCG0000000488	--	--	lincRNA	Annotated_lncRNA	chr1	128182923	128199037	-	3	492	138
ALDBSSCT0000000805	ALDBSSCG0000000489	--	--	lincRNA	Annotated_lncRNA	chr1	128898940	128913482	-	3	514	70
ALDBSSCT0000009643	ALDBSSCG0000005884	--	--	lincRNA	Annotated_lncRNA	chr7	9955764	9957965	+	2	2136	209
ENSSSCT00000035465	ENSSSCG00000006687	ITGA10	-	processed_transcript	Annotated_lncRNA	chr4	109065647	109070602	+	5	558	159
ALDBSSCT0000008302	ALDBSSCG0000005043	--	--	lincRNA	Annotated_lncRNA	chr5	36601785	36602762	+	2	277	62
ALDBSSCT0000010169	ALDBSSCG0000006192	--	--	lincRNA	Annotated_lncRNA	chr7	57684420	57689049	-	2	461	102
ALDBSSCT0000005854	ALDBSSCG0000003560	--	--	lincRNA	Annotated_lncRNA	chr2	29462526	29480226	+	2	3660	183
ALDBSSCT0000006773	ALDBSSCG0000004136	--	--	lincRNA	Annotated_lncRNA	chr3	81815276	81817071	+	2	208	69
ALDBSSCT0000005858	ALDBSSCG0000003563	--	--	lincRNA	Annotated_lncRNA	chr2	31299722	31335297	+	2	1309	100
ALDBSSCT0000011486	ALDBSSCG0000006991	--	--	lincRNA	Annotated_lncRNA	chr9	43025387	43027963	-	2	2201	133
ALDBSSCT0000006676	ALDBSSCG0000004078	--	--	lincRNA	Annotated_lncRNA	chr3	41542151	41546855	+	2	512	75
ALDBSSCT0000002623	ALDBSSCG0000001595	--	--	lincRNA	Annotated_lncRNA	chr13	36881156	36886431	+	2	864	69
ALDBSSCT0000000659	ALDBSSCG0000000395	--	--	lincRNA	Annotated_lncRNA	chr1	17415816	17417300	-	2	1351	126
ALDBSSCT0000000658	ALDBSSCG0000000394	--	--	lincRNA	Annotated_lncRNA	chr1	17264640	17267867	-	2	3110	87
ALDBSSCT0000001250	ALDBSSCG0000000757	--	--	lincRNA	Annotated_lncRNA	chr10	48120915	48122151	+	2	329	52
ALDBSSCT0000003229	ALDBSSCG0000001944	--	--	lincRNA	Annotated_lncRNA	chr13	90659047	90739906	-	4	517	66
ALDBSSCT0000000795	ALDBSSCG0000000481	--	--	lincRNA	Annotated_lncRNA	chr1	120698326	121032009	-	3	365	120
ALDBSSCT0000011454	ALDBSSCG0000006969	--	--	lincRNA	Annotated_lncRNA	chr9	19134172	19136429	-	3	411	129
ALDBSSCT0000007057	ALDBSSCG0000004290	--	--	lincRNA	Annotated_lncRNA	chr3	22227017	22233489	-	4	3915	133
ALDBSSCT0000006510	ALDBSSCG0000003978	--	--	lincRNA	Annotated_lncRNA	chr2	157383171	157384842	-	2	941	124
ENSSSCT00000021865	ENSSSCG00000020270	7SK	7SK RNA [Source:RFAM;Acc:RF00100]	misc_RNA	Annotated_lncRNA	chr8	138081557	138081856	-	1	300	57
ALDBSSCT0000001311	ALDBSSCG0000000798	--	--	lincRNA	Annotated_lncRNA	chr10	65994700	66012410	+	2	435	145
ALDBSSCT0000003221	ALDBSSCG0000001937	--	--	lincRNA	Annotated_lncRNA	chr13	87209879	87255572	-	3	352	83
ALDBSSCT0000003220	ALDBSSCG0000001936	--	--	lincRNA	Annotated_lncRNA	chr13	86560421	86562722	-	2	1659	125
ALDBSSCT0000000657	ALDBSSCG0000000393	--	--	lincRNA	Annotated_lncRNA	chr1	16908387	16918832	-	2	1337	137
ENSSSCT00000033557	ENSSSCG00000030871	CU582909.1	-	processed_transcript	Annotated_lncRNA	chr4	17429474	17517473	-	2	1382	126
ALDBSSCT0000002609	ALDBSSCG0000001587	--	--	lincRNA	Annotated_lncRNA	chr13	33878497	33888233	+	5	409	66
ENSSSCT00000006143	ENSSSCG00000005588	NR5A1	-	processed_transcript	Annotated_lncRNA	chr1	299120563	299135428	+	6	1333	375
ALDBSSCT0000003730	ALDBSSCG0000002232	--	--	lincRNA	Annotated_lncRNA	chr14	117938849	118004721	+	3	236	60
ALDBSSCT0000010148	ALDBSSCG0000006179	--	--	lincRNA	Annotated_lncRNA	chr7	42862953	43010635	-	4	1187	126
ALDBSSCT0000008287	ALDBSSCG0000005032	--	--	lincRNA	Annotated_lncRNA	chr5	22948750	22950461	+	2	499	111
ALDBSSCT0000000098	ALDBSSCG0000000059	--	--	lincRNA	Annotated_lncRNA	chr1	36884546	36886424	+	2	348	95
ALDBSSCT0000007816	ALDBSSCG0000004733	--	--	lincRNA	Annotated_lncRNA	chr4	127816	128340	-	2	376	96
ALDBSSCT0000002351	ALDBSSCG0000001424	--	--	lincRNA	Annotated_lncRNA	chr12	6585306	6588336	-	2	1197	187
ALDBSSCT0000002605	ALDBSSCG0000001584	--	--	lincRNA	Annotated_lncRNA	chr13	28517576	28518856	+	2	959	117
ALDBSSCT0000010490	ALDBSSCG0000006366	--	--	lincRNA	Annotated_lncRNA	chr8	58643037	58644377	+	2	539	76
ALDBSSCT0000010491	ALDBSSCG0000006366	--	--	lincRNA	Annotated_lncRNA	chr8	58643579	58644377	+	2	712	113
ALDBSSCT0000010881	ALDBSSCG0000006593	--	--	lincRNA	Annotated_lncRNA	chr8	73032659	73033964	-	2	1108	200
ALDBSSCT0000010607	ALDBSSCG0000006433	--	--	lincRNA	Annotated_lncRNA	chr8	114650970	114735385	+	4	379	63
ALDBSSCT0000005920	ALDBSSCG0000003616	--	--	lincRNA	Annotated_lncRNA	chr2	74317121	74321624	+	2	1231	185
ALDBSSCT0000007199	ALDBSSCG0000004377	--	--	lincRNA	Annotated_lncRNA	chr3	75945774	75949228	-	2	1700	107
ALDBSSCT0000009121	ALDBSSCG0000005563	--	--	lincRNA	Annotated_lncRNA	chr6	141746547	141966884	+	3	409	117
ALDBSSCT0000002327	ALDBSSCG0000001405	--	--	lincRNA	Annotated_lncRNA	chr12	952107	957120	-	3	4656	301
ALDBSSCT0000002326	ALDBSSCG0000001404	--	--	lincRNA	Annotated_lncRNA	chr12	822448	826094	-	2	1395	192
ALDBSSCT0000007047	ALDBSSCG0000004287	--	--	lincRNA	Annotated_lncRNA	chr3	19939741	19945968	-	2	236	78
ALDBSSCT0000008511	ALDBSSCG0000005176	--	--	lincRNA	Annotated_lncRNA	chr5	14875924	14882059	-	4	964	62
ALDBSSCT0000008949	ALDBSSCG0000005478	--	--	lincRNA	Annotated_lncRNA	chr6	79920782	79929533	+	2	480	101
ALDBSSCT0000002322	ALDBSSCG0000001401	--	--	lincRNA	Annotated_lncRNA	chr12	791808	793043	-	2	444	128
ALDBSSCT0000004957	ALDBSSCG0000003000	--	--	lincRNA	Annotated_lncRNA	chr16	42881401	42882711	-	2	366	85
ALDBSSCT0000008166	ALDBSSCG0000004958	--	--	lincRNA	Annotated_lncRNA	chr4	134027537	134069532	-	4	473	97
ALDBSSCT0000007748	ALDBSSCG0000004701	--	--	lincRNA	Annotated_lncRNA	chr4	137048913	137059041	+	3	1564	135
ALDBSSCT0000010467	ALDBSSCG0000006358	--	--	lincRNA	Annotated_lncRNA	chr8	56861529	56909031	+	3	1238	136
ALDBSSCT0000002541	ALDBSSCG0000001538	--	--	lincRNA	Annotated_lncRNA	chr12	63091672	63095001	-	3	1899	235
ALDBSSCT0000002821	ALDBSSCG0000001715	--	--	lincRNA	Annotated_lncRNA	chr13	134685471	134702667	+	4	763	95
ALDBSSCT0000011526	ALDBSSCG0000007003	--	--	lincRNA	Annotated_lncRNA	chr9	46890871	46892035	-	2	543	65
ALDBSSCT0000011847	ALDBSSCG0000007196	--	--	lincRNA	Annotated_lncRNA	GL896183.1	69460	70364	+	2	825	114
ALDBSSCT0000011882	ALDBSSCG0000007227	--	--	lincRNA	Annotated_lncRNA	JH118898.1	116264	117166	-	2	797	94
ALDBSSCT0000009687	ALDBSSCG0000005912	--	--	lincRNA	Annotated_lncRNA	chr7	27213595	27214274	+	2	559	89
ALDBSSCT0000006846	ALDBSSCG0000004172	--	--	lincRNA	Annotated_lncRNA	chr3	118425369	118427956	+	2	679	161
ENSSSCT00000021958	ENSSSCG00000020363	7SK	7SK RNA [Source:RFAM;Acc:RF00100]	misc_RNA	Annotated_lncRNA	chr2	81351131	81351408	+	1	278	61
ALDBSSCT0000010546	ALDBSSCG0000006395	--	--	lincRNA	Annotated_lncRNA	chr8	85453335	85467073	+	2	326	45
ALDBSSCT0000011937	ALDBSSCG0000007264	--	--	lincRNA	Annotated_lncRNA	chrX	56081712	56082024	+	2	212	70
ALDBSSCT0000003826	ALDBSSCG0000002301	--	--	lincRNA	Annotated_lncRNA	chr14	22186537	22200568	-	2	371	123
ALDBSSCT0000003353	ALDBSSCG0000002015	--	--	lincRNA	Annotated_lncRNA	chr13	161256043	161273678	-	2	13524	140
ALDBSSCT0000003622	ALDBSSCG0000002172	--	--	lincRNA	Annotated_lncRNA	chr14	65774083	65781203	+	3	1527	104
ALDBSSCT0000000570	ALDBSSCG0000000339	--	--	lincRNA	Annotated_lncRNA	chr1	308642108	308643667	+	3	1353	207
ALDBSSCT0000008020	ALDBSSCG0000004863	--	--	lincRNA	Annotated_lncRNA	chr4	83948292	83956904	-	2	5104	150
ALDBSSCT0000003820	ALDBSSCG0000002297	--	--	lincRNA	Annotated_lncRNA	chr14	20701908	20942315	-	4	313	65
ALDBSSCT0000009340	ALDBSSCG0000005696	--	--	lincRNA	Annotated_lncRNA	chr6	51913729	51917512	-	2	313	45
ALDBSSCT0000003457	ALDBSSCG0000002083	--	--	lincRNA	Annotated_lncRNA	chr14	4541678	4547010	+	2	5029	166
ALDBSSCT0000012067	ALDBSSCG0000007357	--	--	lincRNA	Annotated_lncRNA	chrX	113371650	113372259	-	2	271	71
ALDBSSCT0000012066	ALDBSSCG0000007356	--	--	lincRNA	Annotated_lncRNA	chrX	113117586	113132860	-	4	722	112
ALDBSSCT0000008848	ALDBSSCG0000005406	--	--	lincRNA	Annotated_lncRNA	chr6	48452344	48454083	+	3	1061	135
ALDBSSCT0000004590	ALDBSSCG0000002792	--	--	lincRNA	Annotated_lncRNA	chr15	122882410	122883897	-	3	264	69
ALDBSSCT0000002698	ALDBSSCG0000001638	--	--	lincRNA	Annotated_lncRNA	chr13	85347227	85351630	+	2	493	111
ALDBSSCT0000002107	ALDBSSCG0000001267	--	--	lincRNA	Annotated_lncRNA	chr12	686846	689923	+	2	578	126
ALDBSSCT0000007688	ALDBSSCG0000004668	--	--	lincRNA	Annotated_lncRNA	chr4	116701426	116703063	+	2	1413	145
ALDBSSCT0000008920	ALDBSSCG0000005452	--	--	lincRNA	Annotated_lncRNA	chr6	64231178	64269575	+	2	953	163
ALDBSSCT0000007942	ALDBSSCG0000004813	--	--	lincRNA	Annotated_lncRNA	chr4	41943465	41961259	-	4	979	251
ALDBSSCT0000011958	ALDBSSCG0000007278	--	--	lincRNA	Annotated_lncRNA	chrX	103841191	103844939	+	2	508	149
ALDBSSCT0000002452	ALDBSSCG0000001486	--	--	lincRNA	Annotated_lncRNA	chr12	44331176	44337539	-	3	1311	86
ALDBSSCT0000006950	ALDBSSCG0000004220	--	--	lincRNA	Annotated_lncRNA	chr3	135824304	135825585	+	2	1140	266
ALDBSSCT0000010864	ALDBSSCG0000006581	--	--	lincRNA	Annotated_lncRNA	chr8	58014703	58019820	-	2	2259	134
ALDBSSCT0000007896	ALDBSSCG0000004781	--	--	lincRNA	Annotated_lncRNA	chr4	17278039	17279834	-	3	1328	127
ALDBSSCT0000011938	ALDBSSCG0000007265	--	--	lincRNA	Annotated_lncRNA	chrX	65532325	65534677	+	2	1895	175
ALDBSSCT0000010861	ALDBSSCG0000006578	--	--	lincRNA	Annotated_lncRNA	chr8	57599828	57605613	-	2	4561	147
ALDBSSCT0000002108	ALDBSSCG0000001267	--	--	lincRNA	Annotated_lncRNA	chr12	686885	772840	+	9	1181	128
ALDBSSCT0000002211	ALDBSSCG0000001324	--	--	lincRNA	Annotated_lncRNA	chr12	19493376	19497630	+	2	3750	120
ALDBSSCT0000004722	ALDBSSCG0000002874	--	--	lincRNA	Annotated_lncRNA	chr16	23227879	23235044	+	2	6989	310
ALDBSSCT0000009786	ALDBSSCG0000005966	--	--	lincRNA	Annotated_lncRNA	chr7	57464771	57474117	+	3	306	44
ALDBSSCT0000011272	ALDBSSCG0000006842	--	--	lincRNA	Annotated_lncRNA	chr9	85564709	85595204	+	2	445	98
ALDBSSCT0000003687	ALDBSSCG0000002206	--	--	lincRNA	Annotated_lncRNA	chr14	97100746	97113386	+	2	389	82
ALDBSSCT0000002219	ALDBSSCG0000001332	--	--	lincRNA	Annotated_lncRNA	chr12	24884118	24888554	+	3	2614	343
ENSSSCT00000021723	ENSSSCG00000020128	7SK	7SK RNA [Source:RFAM;Acc:RF00100]	misc_RNA	Annotated_lncRNA	chr9	138727106	138727335	+	1	230	51
ENSSSCT00000034907	ENSSSCG00000030790	TMP-CH242-74M17.6	-	processed_transcript	Annotated_lncRNA	chr7	24626856	24627344	-	2	309	103
ENSSSCT00000036566	ENSSSCG00000031014	CU468856.2	-	lincRNA	Annotated_lncRNA	chr13	57531867	57533531	-	2	948	158
ALDBSSCT0000008066	ALDBSSCG0000004892	--	--	lincRNA	Annotated_lncRNA	chr4	102627639	102632551	-	2	232	77
ALDBSSCT0000006584	ALDBSSCG0000004021	--	--	lincRNA	Annotated_lncRNA	chr3	17615129	17618040	+	2	326	95
ALDBSSCT0000007299	ALDBSSCG0000004429	--	--	lincRNA	Annotated_lncRNA	chr3	110494418	110499120	-	2	4596	138
ALDBSSCT0000003606	ALDBSSCG0000002158	--	--	lincRNA	Annotated_lncRNA	chr14	53504968	53505821	+	2	844	142
ALDBSSCT0000001413	ALDBSSCG0000000856	--	--	lincRNA	Annotated_lncRNA	chr10	13669071	13737338	-	3	258	71
ALDBSSCT0000001555	ALDBSSCG0000000948	--	--	lincRNA	Annotated_lncRNA	chr10	63420021	63422944	-	2	379	47
ALDBSSCT0000011818	ALDBSSCG0000007174	--	--	lincRNA	Annotated_lncRNA	GL893689.1	63126	81187	+	3	256	53
ALDBSSCT0000004077	ALDBSSCG0000002467	--	--	lincRNA	Annotated_lncRNA	chr14	145928321	145990199	-	2	312	49
ALDBSSCT0000004076	ALDBSSCG0000002466	--	--	lincRNA	Annotated_lncRNA	chr14	145624475	145630025	-	5	831	91
ALDBSSCT0000010798	ALDBSSCG0000006532	--	--	lincRNA	Annotated_lncRNA	chr8	20838193	20847553	-	2	8296	190
ALDBSSCT0000007292	ALDBSSCG0000004423	--	--	lincRNA	Annotated_lncRNA	chr3	106783734	106786319	-	2	665	97
ALDBSSCT0000007800	ALDBSSCG0000004723	--	--	lincRNA	Annotated_lncRNA	chr4	141915070	142011197	+	3	240	66
ALDBSSCT0000000275	ALDBSSCG0000000161	--	--	lincRNA	Annotated_lncRNA	chr1	137503449	137507949	+	2	3961	179
ALDBSSCT0000005909	ALDBSSCG0000003605	--	--	lincRNA	Annotated_lncRNA	chr2	66895878	66899147	+	2	2779	127
ALDBSSCT0000000272	ALDBSSCG0000000161	--	--	lincRNA	Annotated_lncRNA	chr1	137493050	137507949	+	3	13295	151
ALDBSSCT0000002070	ALDBSSCG0000001246	--	--	lincRNA	Annotated_lncRNA	chr11	82951896	82952593	-	2	693	132
ALDBSSCT0000005375	ALDBSSCG0000003251	--	--	lincRNA	Annotated_lncRNA	chr17	54301868	54306646	-	2	795	104
ALDBSSCT0000000352	ALDBSSCG0000000211	--	--	lincRNA	Annotated_lncRNA	chr1	180562323	180615256	+	2	391	86
ALDBSSCT0000005377	ALDBSSCG0000003253	--	--	lincRNA	Annotated_lncRNA	chr17	54600160	54603445	-	2	232	76
ALDBSSCT0000006787	ALDBSSCG0000004144	--	--	lincRNA	Annotated_lncRNA	chr3	92055400	92060072	+	2	3002	155
ALDBSSCT0000006786	ALDBSSCG0000004143	--	--	lincRNA	Annotated_lncRNA	chr3	90381847	90390082	+	4	455	62
ALDBSSCT0000007535	ALDBSSCG0000004572	--	--	lincRNA	Annotated_lncRNA	chr4	51312435	51322933	+	2	8716	127
ALDBSSCT0000010008	ALDBSSCG0000006085	--	--	lincRNA	Annotated_lncRNA	chr7	2451928	2454600	-	2	1922	163
ALDBSSCT0000002779	ALDBSSCG0000001685	--	--	lincRNA	Annotated_lncRNA	chr13	117682949	117684859	+	2	250	80
ALDBSSCT0000011527	ALDBSSCG0000007003	--	--	lincRNA	Annotated_lncRNA	chr9	46890871	46897144	-	2	472	65
ALDBSSCT0000005174	ALDBSSCG0000003124	--	--	lincRNA	Annotated_lncRNA	chr17	47119459	47122536	+	3	622	79
ALDBSSCT0000005173	ALDBSSCG0000003123	--	--	lincRNA	Annotated_lncRNA	chr17	46934439	46935439	+	3	588	99
ALDBSSCT0000001002	ALDBSSCG0000000615	--	--	lincRNA	Annotated_lncRNA	chr1	264992677	265047743	-	2	472	157
ALDBSSCT0000001001	ALDBSSCG0000000614	--	--	lincRNA	Annotated_lncRNA	chr1	264670023	264672295	-	2	319	106
ALDBSSCT0000011135	ALDBSSCG0000006756	--	--	lincRNA	Annotated_lncRNA	chr9	32511560	32566579	+	4	584	111
ALDBSSCT0000010088	ALDBSSCG0000006141	--	--	lincRNA	Annotated_lncRNA	chr7	24706151	24706857	-	2	492	86
ALDBSSCT0000010723	ALDBSSCG0000006489	--	--	lincRNA	Annotated_lncRNA	chr8	689174	690363	-	2	539	135
ALDBSSCT0000005771	ALDBSSCG0000003506	--	--	lincRNA	Annotated_lncRNA	chr2	1480231	1482657	+	2	274	91
ALDBSSCT0000005900	ALDBSSCG0000003599	--	--	lincRNA	Annotated_lncRNA	chr2	61637007	61637497	+	2	201	66
ALDBSSCT0000010726	ALDBSSCG0000006491	--	--	lincRNA	Annotated_lncRNA	chr8	946562	952314	-	3	1830	128
ALDBSSCT0000010081	ALDBSSCG0000006137	--	--	lincRNA	Annotated_lncRNA	chr7	22478372	22480123	-	2	905	122
ALDBSSCT0000010080	ALDBSSCG0000006137	--	--	lincRNA	Annotated_lncRNA	chr7	22478372	22480123	-	2	763	71
ALDBSSCT0000008819	ALDBSSCG0000005386	--	--	lincRNA	Annotated_lncRNA	chr6	41716505	41718359	+	2	233	77
ALDBSSCT0000009292	ALDBSSCG0000005667	--	--	lincRNA	Annotated_lncRNA	chr6	39985065	39993892	-	3	1803	218
ALDBSSCT0000011142	ALDBSSCG0000006759	--	--	lincRNA	Annotated_lncRNA	chr9	38080137	38091710	+	2	686	103
ALDBSSCT0000007205	ALDBSSCG0000004382	--	--	lincRNA	Annotated_lncRNA	chr3	79115166	79169753	-	2	1778	98
ALDBSSCT0000007204	ALDBSSCG0000004381	--	--	lincRNA	Annotated_lncRNA	chr3	78987517	79009707	-	5	830	143
ALDBSSCT0000007360	ALDBSSCG0000004469	--	--	lincRNA	Annotated_lncRNA	chr3	135815145	135824179	-	2	8473	252
ALDBSSCT0000002589	ALDBSSCG0000001574	--	--	lincRNA	Annotated_lncRNA	chr13	25498743	25509991	+	5	698	83
ALDBSSCT0000002588	ALDBSSCG0000001573	--	--	lincRNA	Annotated_lncRNA	chr13	25460266	25460847	+	2	573	72
ALDBSSCT0000009461	ALDBSSCG0000005770	--	--	lincRNA	Annotated_lncRNA	chr6	90721672	90724653	-	3	335	92
ALDBSSCT0000009377	ALDBSSCG0000005718	--	--	lincRNA	Annotated_lncRNA	chr6	58288394	58290134	-	3	1321	147
ALDBSSCT0000009462	ALDBSSCG0000005771	--	--	lincRNA	Annotated_lncRNA	chr6	93166679	93195562	-	2	626	98
ALDBSSCT0000002582	ALDBSSCG0000001568	--	--	lincRNA	Annotated_lncRNA	chr13	17560563	17591279	+	3	513	90
ALDBSSCT0000007414	ALDBSSCG0000004493	--	--	lincRNA	Annotated_lncRNA	chr4	2167846	2169852	+	2	1032	190
ALDBSSCT0000003859	ALDBSSCG0000002318	--	--	lincRNA	Annotated_lncRNA	chr14	35979098	36013949	-	5	1853	143
ALDBSSCT0000003917	ALDBSSCG0000002355	--	--	lincRNA	Annotated_lncRNA	chr14	54510427	54511319	-	2	574	191
ALDBSSCT0000003915	ALDBSSCG0000002354	--	--	lincRNA	Annotated_lncRNA	chr14	52322075	52323011	-	2	240	78
ALDBSSCT0000003914	ALDBSSCG0000002353	--	--	lincRNA	Annotated_lncRNA	chr14	51015689	51017214	-	2	313	103
ALDBSSCT0000012039	ALDBSSCG0000007339	--	--	lincRNA	Annotated_lncRNA	chrX	67444265	67445925	-	4	314	97
ALDBSSCT0000005452	ALDBSSCG0000003302	--	--	lincRNA	Annotated_lncRNA	chr18	8550430	8553365	+	2	2865	157
ALDBSSCT0000010526	ALDBSSCG0000006386	--	--	lincRNA	Annotated_lncRNA	chr8	81084317	81088640	+	2	1048	90
ALDBSSCT0000006738	ALDBSSCG0000004112	--	--	lincRNA	Annotated_lncRNA	chr3	58847852	58912933	+	2	1512	160
ENSSSCT00000033761	ENSSSCG00000030860	ZFX	-	processed_transcript	Annotated_lncRNA	chrX	21645222	21645390	+	1	169	56
ALDBSSCT0000005517	ALDBSSCG0000003344	--	--	lincRNA	Annotated_lncRNA	chr18	40343760	40355405	+	5	1278	128
ALDBSSCT0000005516	ALDBSSCG0000003344	--	--	lincRNA	Annotated_lncRNA	chr18	40343149	40351099	+	4	495	96
ALDBSSCT0000005458	ALDBSSCG0000003307	--	--	lincRNA	Annotated_lncRNA	chr18	12337284	12338258	+	2	793	82
ALDBSSCT0000005513	ALDBSSCG0000003342	--	--	lincRNA	Annotated_lncRNA	chr18	35222463	35223661	+	2	745	115
ALDBSSCT0000008522	ALDBSSCG0000005185	--	--	lincRNA	Annotated_lncRNA	chr5	20091141	20097043	-	2	841	129
ALDBSSCT0000001173	ALDBSSCG0000000726	--	--	lincRNA	Annotated_lncRNA	chr10	29076622	29083257	+	2	4866	226
ALDBSSCT0000001170	ALDBSSCG0000000723	--	--	lincRNA	Annotated_lncRNA	chr10	26155024	26155653	+	2	549	72
ALDBSSCT0000001850	ALDBSSCG0000001115	--	--	lincRNA	Annotated_lncRNA	chr11	203640	220289	-	2	363	79
ALDBSSCT0000007825	ALDBSSCG0000004740	--	--	lincRNA	Annotated_lncRNA	chr4	1448002	1450982	-	2	1079	135
ALDBSSCT0000011245	ALDBSSCG0000006829	--	--	lincRNA	Annotated_lncRNA	chr9	74390609	74393783	+	2	2247	102
ALDBSSCT0000002973	ALDBSSCG0000001788	--	--	lincRNA	Annotated_lncRNA	chr13	202456182	202471469	+	3	1320	97
ALDBSSCT0000011356	ALDBSSCG0000006897	--	--	lincRNA	Annotated_lncRNA	chr9	137663830	137725093	+	3	870	113
ALDBSSCT0000003076	ALDBSSCG0000001846	--	--	lincRNA	Annotated_lncRNA	chr13	23799471	23800355	-	2	757	163
ALDBSSCT0000011355	ALDBSSCG0000006897	--	--	lincRNA	Annotated_lncRNA	chr9	137659239	137671465	+	3	7589	170
ALDBSSCT0000011353	ALDBSSCG0000006896	--	--	lincRNA	Annotated_lncRNA	chr9	137020289	137025834	+	3	1164	246
ALDBSSCT0000001912	ALDBSSCG0000001157	--	--	lincRNA	Annotated_lncRNA	chr11	14257314	14259257	-	2	1840	92
ALDBSSCT0000011033	ALDBSSCG0000006695	--	--	lincRNA	Annotated_lncRNA	chr9	65460	66764	+	2	407	88
ALDBSSCT0000005587	ALDBSSCG0000003380	--	--	lincRNA	Annotated_lncRNA	chr18	56115319	56192888	+	2	333	111
ALDBSSCT0000006246	ALDBSSCG0000003813	--	--	lincRNA	Annotated_lncRNA	chr2	29432629	29463536	-	2	405	115
ALDBSSCT0000004915	ALDBSSCG0000002980	--	--	lincRNA	Annotated_lncRNA	chr16	29270216	29272597	-	2	1548	157
ALDBSSCT0000005583	ALDBSSCG0000003377	--	--	lincRNA	Annotated_lncRNA	chr18	55401734	55403082	+	3	837	147
ALDBSSCT0000009236	ALDBSSCG0000005628	--	--	lincRNA	Annotated_lncRNA	chr6	12429782	12432301	-	2	1726	226
ALDBSSCT0000011950	ALDBSSCG0000007272	--	--	lincRNA	Annotated_lncRNA	chrX	86697706	86698443	+	2	730	69
ENSSSCT00000033365	ENSSSCG00000024809	CLCN4	-	processed_transcript	Annotated_lncRNA	chrX	7339507	7377347	+	3	753	173
ALDBSSCT0000006167	ALDBSSCG0000003770	--	--	lincRNA	Annotated_lncRNA	chr2	8740494	8789085	-	2	627	98
ALDBSSCT0000011038	ALDBSSCG0000006699	--	--	lincRNA	Annotated_lncRNA	chr9	1323893	1331891	+	3	2476	146
ALDBSSCT0000006249	ALDBSSCG0000003815	--	--	lincRNA	Annotated_lncRNA	chr2	30980287	30986006	-	2	3817	124
ALDBSSCT0000004851	ALDBSSCG0000002945	--	--	lincRNA	Annotated_lncRNA	chr16	78119274	78129719	+	2	391	121
ALDBSSCT0000009044	ALDBSSCG0000005523	--	--	lincRNA	Annotated_lncRNA	chr6	110652467	110734909	+	2	467	76
ALDBSSCT0000008439	ALDBSSCG0000005125	--	--	lincRNA	Annotated_lncRNA	chr5	95094019	95434577	+	7	1908	110
ALDBSSCT0000008615	ALDBSSCG0000005243	--	--	lincRNA	Annotated_lncRNA	chr5	76448186	76450231	-	2	482	93
ALDBSSCT0000001984	ALDBSSCG0000001199	--	--	lincRNA	Annotated_lncRNA	chr11	50565302	50567265	-	2	963	123
ALDBSSCT0000004383	ALDBSSCG0000002663	--	--	lincRNA	Annotated_lncRNA	chr15	8167430	8187632	-	3	257	45
ALDBSSCT0000008011	ALDBSSCG0000004857	--	--	lincRNA	Annotated_lncRNA	chr4	82551038	82560074	-	3	7208	142
ALDBSSCT0000004381	ALDBSSCG0000002661	--	--	lincRNA	Annotated_lncRNA	chr15	3551455	3570375	-	2	224	50
ALDBSSCT0000010886	ALDBSSCG0000006595	--	--	lincRNA	Annotated_lncRNA	chr8	73273481	73320571	-	6	4998	91
ALDBSSCT0000008431	ALDBSSCG0000005118	--	--	lincRNA	Annotated_lncRNA	chr5	94008788	94016016	+	2	4309	174
ALDBSSCT0000007931	ALDBSSCG0000004805	--	--	lincRNA	Annotated_lncRNA	chr4	36357246	36359669	-	2	1527	89
ALDBSSCT0000008433	ALDBSSCG0000005119	--	--	lincRNA	Annotated_lncRNA	chr5	94043178	94052225	+	3	357	88
ENSSSCT00000033566	ENSSSCG00000000651	CLEC12B	-	processed_transcript	Annotated_lncRNA	chr5	64741090	64747876	+	6	1026	249
ALDBSSCT0000004262	ALDBSSCG0000002581	--	--	lincRNA	Annotated_lncRNA	chr15	97079916	97084396	+	3	2753	79
ALDBSSCT0000008939	ALDBSSCG0000005469	--	--	lincRNA	Annotated_lncRNA	chr6	76014214	76018041	+	4	430	142
ALDBSSCT0000010974	ALDBSSCG0000006657	--	--	lincRNA	Annotated_lncRNA	chr8	129204934	129233097	-	2	343	114
ALDBSSCT0000008862	ALDBSSCG0000005416	--	--	lincRNA	Annotated_lncRNA	chr6	51770940	51771954	+	2	644	107
ALDBSSCT0000000758	ALDBSSCG0000000455	--	--	lincRNA	Annotated_lncRNA	chr1	90139805	90197851	-	2	284	87
ALDBSSCT0000011974	ALDBSSCG0000007289	--	--	lincRNA	Annotated_lncRNA	chrX	125570775	125574646	+	2	839	76
ALDBSSCT0000010851	ALDBSSCG0000006574	--	--	lincRNA	Annotated_lncRNA	chr8	56863475	56896317	-	3	1158	119
ALDBSSCT0000007063	ALDBSSCG0000004294	--	--	lincRNA	Annotated_lncRNA	chr3	24272678	24280784	-	3	250	83
ALDBSSCT0000007634	ALDBSSCG0000004631	--	--	lincRNA	Annotated_lncRNA	chr4	98552102	98554465	+	2	436	99
ALDBSSCT0000007061	ALDBSSCG0000004293	--	--	lincRNA	Annotated_lncRNA	chr3	24066870	24120934	-	3	489	127
ALDBSSCT0000003576	ALDBSSCG0000002142	--	--	lincRNA	Annotated_lncRNA	chr14	47033902	47045716	+	3	625	78
ALDBSSCT0000004187	ALDBSSCG0000002534	--	--	lincRNA	Annotated_lncRNA	chr15	59735229	59792303	+	2	896	88
ALDBSSCT0000001353	ALDBSSCG0000000829	--	--	lincRNA	Annotated_lncRNA	chr10	76375888	76390418	+	3	1283	123
ALDBSSCT0000001352	ALDBSSCG0000000829	--	--	lincRNA	Annotated_lncRNA	chr10	76375868	76390418	+	4	1423	123
ALDBSSCT0000003670	ALDBSSCG0000002194	--	--	lincRNA	Annotated_lncRNA	chr14	87723872	87759038	+	4	2096	113
ALDBSSCT0000010057	ALDBSSCG0000006119	--	--	lincRNA	Annotated_lncRNA	chr7	13010288	13012950	-	4	2635	156
ENSSSCT00000035867	ENSSSCG00000007146	SIGLEC1	-	processed_transcript	Annotated_lncRNA	chr17	36328314	36349591	+	21	7378	1190
ALDBSSCT0000008932	ALDBSSCG0000005463	--	--	lincRNA	Annotated_lncRNA	chr6	73899767	73900156	+	2	378	68
ALDBSSCT0000003174	ALDBSSCG0000001910	--	--	lincRNA	Annotated_lncRNA	chr13	73148368	73153144	-	2	1825	122
ALDBSSCT0000012072	ALDBSSCG0000007361	--	--	lincRNA	Annotated_lncRNA	chrX	116291439	116294026	-	3	498	79
ALDBSSCT0000005808	ALDBSSCG0000003528	--	--	lincRNA	Annotated_lncRNA	chr2	9689967	9693663	+	4	738	111
ALDBSSCT0000011957	ALDBSSCG0000007277	--	--	lincRNA	Annotated_lncRNA	chrX	102841320	102859451	+	3	217	71
ALDBSSCT0000008330	ALDBSSCG0000005055	--	--	lincRNA	Annotated_lncRNA	chr5	53008497	53302891	+	4	243	51
ALDBSSCT0000011085	ALDBSSCG0000006727	--	--	lincRNA	Annotated_lncRNA	chr9	11133931	11134491	+	2	554	170
ALDBSSCT0000003179	ALDBSSCG0000001913	--	--	lincRNA	Annotated_lncRNA	chr13	74995721	75088198	-	3	591	155
ALDBSSCT0000009474	ALDBSSCG0000005778	--	--	lincRNA	Annotated_lncRNA	chr6	96138072	96163022	-	3	10103	195
ALDBSSCT0000006605	ALDBSSCG0000004037	--	--	lincRNA	Annotated_lncRNA	chr3	25776844	25779795	+	3	603	91
ALDBSSCT0000008231	ALDBSSCG0000004997	--	--	lincRNA	Annotated_lncRNA	chr5	1531036	1534106	+	3	905	170
ENSSSCT00000035001	ENSSSCG00000001727	TNFRSF21	-	processed_transcript	Annotated_lncRNA	chr7	48720692	48748761	-	3	2943	508
ALDBSSCT0000005966	ALDBSSCG0000003644	--	--	lincRNA	Annotated_lncRNA	chr2	98556118	98557956	+	3	1286	123
ALDBSSCT0000010428	ALDBSSCG0000006334	--	--	lincRNA	Annotated_lncRNA	chr8	24383847	24485336	+	2	550	58
ALDBSSCT0000007661	ALDBSSCG0000004651	--	--	lincRNA	Annotated_lncRNA	chr4	106488186	106495413	+	2	1109	126
ENSSSCT00000032811	ENSSSCG00000030756	CH242-236H7.3	-	processed_transcript	Annotated_lncRNA	chrX	6072242	6097234	-	2	628	87
ALDBSSCT0000001183	ALDBSSCG0000000733	--	--	lincRNA	Annotated_lncRNA	chr10	32042188	32046547	+	3	955	101
ALDBSSCT0000007667	ALDBSSCG0000004657	--	--	lincRNA	Annotated_lncRNA	chr4	109080998	109083204	+	2	2202	157
ALDBSSCT0000007980	ALDBSSCG0000004837	--	--	lincRNA	Annotated_lncRNA	chr4	73785549	73799648	-	2	261	83
ALDBSSCT0000006542	ALDBSSCG0000003999	--	--	lincRNA	Annotated_lncRNA	chr3	6414912	6419954	+	3	2229	127
ALDBSSCT0000006328	ALDBSSCG0000003870	--	--	lincRNA	Annotated_lncRNA	chr2	74635388	74641394	-	2	225	72
ALDBSSCT0000001454	ALDBSSCG0000000877	--	--	lincRNA	Annotated_lncRNA	chr10	19937230	19951293	-	3	11630	130
ALDBSSCT0000003318	ALDBSSCG0000001997	--	--	lincRNA	Annotated_lncRNA	chr13	147719742	147720712	-	2	894	106
ALDBSSCT0000001456	ALDBSSCG0000000877	--	--	lincRNA	Annotated_lncRNA	chr10	19937230	19951293	-	2	13497	130
ALDBSSCT0000006544	ALDBSSCG0000004000	--	--	lincRNA	Annotated_lncRNA	chr3	6572301	6573154	+	2	531	88
ALDBSSCT0000002385	ALDBSSCG0000001444	--	--	lincRNA	Annotated_lncRNA	chr12	15877723	15883046	-	2	4034	241
ALDBSSCT0000001459	ALDBSSCG0000000880	--	--	lincRNA	Annotated_lncRNA	chr10	21582356	21591432	-	2	1685	102
ALDBSSCT0000006548	ALDBSSCG0000004002	--	--	lincRNA	Annotated_lncRNA	chr3	8501117	8511984	+	3	4952	134
ALDBSSCT0000009181	ALDBSSCG0000005593	--	--	lincRNA	Annotated_lncRNA	chr6	156127454	156128279	+	2	679	158
ALDBSSCT0000002228	ALDBSSCG0000001339	--	--	lincRNA	Annotated_lncRNA	chr12	33326426	33361871	+	4	1086	80
ALDBSSCT0000000928	ALDBSSCG0000000571	--	--	lincRNA	Annotated_lncRNA	chr1	216464534	216467316	-	2	2297	94
ALDBSSCT0000001886	ALDBSSCG0000001141	--	--	lincRNA	Annotated_lncRNA	chr11	6809063	6819486	-	2	2140	118
ALDBSSCT0000008808	ALDBSSCG0000005379	--	--	lincRNA	Annotated_lncRNA	chr6	40222776	40224902	+	4	562	90
ALDBSSCT0000002553	ALDBSSCG0000001548	--	--	lincRNA	Annotated_lncRNA	chr13	4251196	4251926	+	2	227	75
ALDBSSCT0000011314	ALDBSSCG0000006871	--	--	lincRNA	Annotated_lncRNA	chr9	126399227	126400561	+	2	226	57
ALDBSSCT0000010555	ALDBSSCG0000006402	--	--	lincRNA	Annotated_lncRNA	chr8	89576131	89578551	+	2	1740	106
ALDBSSCT0000002225	ALDBSSCG0000001336	--	--	lincRNA	Annotated_lncRNA	chr12	32823580	32826316	+	2	1808	57
ALDBSSCT0000002317	ALDBSSCG0000001399	--	--	lincRNA	Annotated_lncRNA	chr12	647059	650654	-	2	2166	258
ALDBSSCT0000010678	ALDBSSCG0000006475	--	--	lincRNA	Annotated_lncRNA	chr8	144715923	144727029	+	6	7394	136
ALDBSSCT0000004447	ALDBSSCG0000002711	--	--	lincRNA	Annotated_lncRNA	chr15	53516558	53584877	-	3	731	105
ALDBSSCT0000004441	ALDBSSCG0000002705	--	--	lincRNA	Annotated_lncRNA	chr15	51511646	51530545	-	3	2981	108
ALDBSSCT0000003380	ALDBSSCG0000002032	--	--	lincRNA	Annotated_lncRNA	chr13	191553793	191555254	-	2	1165	153
ALDBSSCT0000002311	ALDBSSCG0000001395	--	--	lincRNA	Annotated_lncRNA	chr12	62683921	62685165	+	2	800	102
ALDBSSCT0000002257	ALDBSSCG0000001359	--	--	lincRNA	Annotated_lncRNA	chr12	44151633	44153461	+	2	1822	133
ALDBSSCT0000010453	ALDBSSCG0000006351	--	--	lincRNA	Annotated_lncRNA	chr8	43012458	43015612	+	2	3138	127
ALDBSSCT0000008938	ALDBSSCG0000005468	--	--	lincRNA	Annotated_lncRNA	chr6	75877353	75879587	+	2	247	81
ALDBSSCT0000004760	ALDBSSCG0000002897	--	--	lincRNA	Annotated_lncRNA	chr16	38491013	38492742	+	2	1185	87
ENSSSCT00000034748	ENSSSCG00000005588	NR5A1	-	processed_transcript	Annotated_lncRNA	chr1	299123683	299135292	+	4	1857	329
ALDBSSCT0000006128	ALDBSSCG0000003744	--	--	lincRNA	Annotated_lncRNA	chr2	3109187	3158281	-	2	787	85
ALDBSSCT0000007019	ALDBSSCG0000004268	--	--	lincRNA	Annotated_lncRNA	chr3	11422001	11425024	-	2	2755	152
ALDBSSCT0000011858	ALDBSSCG0000007205	--	--	lincRNA	Annotated_lncRNA	GL896456.1	29942	44725	-	3	747	124
ALDBSSCT0000011172	ALDBSSCG0000006782	--	--	lincRNA	Annotated_lncRNA	chr9	50954661	50957881	+	2	251	80
ALDBSSCT0000009129	ALDBSSCG0000005567	--	--	lincRNA	Annotated_lncRNA	chr6	143658806	143661919	+	2	3106	104
ALDBSSCT0000004682	ALDBSSCG0000002851	--	--	lincRNA	Annotated_lncRNA	chr16	4209087	4210914	+	4	1788	149
ALDBSSCT0000001752	ALDBSSCG0000001063	--	--	lincRNA	Annotated_lncRNA	chr11	52280846	52283454	+	2	812	111
ALDBSSCT0000011315	ALDBSSCG0000006872	--	--	lincRNA	Annotated_lncRNA	chr9	127640360	127641469	+	2	216	72
ALDBSSCT0000010518	ALDBSSCG0000006381	--	--	lincRNA	Annotated_lncRNA	chr8	77498057	77499073	+	2	515	88
ALDBSSCT0000007016	ALDBSSCG0000004265	--	--	lincRNA	Annotated_lncRNA	chr3	10575565	10578193	-	2	314	54
ALDBSSCT0000004687	ALDBSSCG0000002855	--	--	lincRNA	Annotated_lncRNA	chr16	5150083	5152455	+	2	2365	128
ALDBSSCT0000011853	ALDBSSCG0000007202	--	--	lincRNA	Annotated_lncRNA	GL896324.1	46204	47110	+	2	793	129
ALDBSSCT0000002863	ALDBSSCG0000001738	--	--	lincRNA	Annotated_lncRNA	chr13	157015058	157038492	+	3	1001	80
ALDBSSCT0000009098	ALDBSSCG0000005549	--	--	lincRNA	Annotated_lncRNA	chr6	133821819	133826074	+	4	3344	150
ALDBSSCT0000000405	ALDBSSCG0000000236	--	--	lincRNA	Annotated_lncRNA	chr1	204418054	204423523	+	2	1931	82
ALDBSSCT0000009317	ALDBSSCG0000005680	--	--	lincRNA	Annotated_lncRNA	chr6	44523173	44528228	-	2	226	56
ALDBSSCT0000003520	ALDBSSCG0000002118	--	--	lincRNA	Annotated_lncRNA	chr14	31349880	31361764	+	3	455	75
ALDBSSCT0000002138	ALDBSSCG0000001281	--	--	lincRNA	Annotated_lncRNA	chr12	4675035	4708882	+	5	1635	151
ALDBSSCT0000009314	ALDBSSCG0000005679	--	--	lincRNA	Annotated_lncRNA	chr6	44042708	44071572	-	3	3060	142
ALDBSSCT0000002425	ALDBSSCG0000001468	--	--	lincRNA	Annotated_lncRNA	chr12	36849088	36851275	-	2	992	103
ALDBSSCT0000010280	ALDBSSCG0000006248	--	--	lincRNA	Annotated_lncRNA	chr7	97495039	97533382	-	3	881	205
ALDBSSCT0000003958	ALDBSSCG0000002385	--	--	lincRNA	Annotated_lncRNA	chr14	70773051	70773782	-	2	727	57
ALDBSSCT0000010856	ALDBSSCG0000006576	--	--	lincRNA	Annotated_lncRNA	chr8	57410200	57417376	-	2	5812	168
ALDBSSCT0000006869	ALDBSSCG0000004185	--	--	lincRNA	Annotated_lncRNA	chr3	122754098	122755354	+	2	480	43
ALDBSSCT0000002034	ALDBSSCG0000001229	--	--	lincRNA	Annotated_lncRNA	chr11	76561511	76611190	-	4	1129	179
ALDBSSCT0000005708	ALDBSSCG0000003464	--	--	lincRNA	Annotated_lncRNA	chr18	42159865	42170214	-	3	1007	84
ALDBSSCT0000010677	ALDBSSCG0000006475	--	--	lincRNA	Annotated_lncRNA	chr8	144715900	144727029	+	7	7090	136
ALDBSSCT0000005333	ALDBSSCG0000003227	--	--	lincRNA	Annotated_lncRNA	chr17	35116648	35126297	-	5	646	124
ALDBSSCT0000010668	ALDBSSCG0000006475	--	--	lincRNA	Annotated_lncRNA	chr8	144715691	144727029	+	7	4649	136
ALDBSSCT0000005706	ALDBSSCG0000003464	--	--	lincRNA	Annotated_lncRNA	chr18	42109499	42170217	-	4	2310	103
ALDBSSCT0000006863	ALDBSSCG0000004183	--	--	lincRNA	Annotated_lncRNA	chr3	122442067	122518280	+	2	555	89
ALDBSSCT0000005338	ALDBSSCG0000003228	--	--	lincRNA	Annotated_lncRNA	chr17	37473921	37482813	-	3	1308	285
ENSSSCT00000035481	ENSSSCG00000030916	CH242-136A20.1	-	lincRNA	Annotated_lncRNA	chr7	106551501	106552738	-	1	1238	108
ALDBSSCT0000011464	ALDBSSCG0000006975	--	--	lincRNA	Annotated_lncRNA	chr9	22334948	22337157	-	3	318	75
ALDBSSCT0000004611	ALDBSSCG0000002805	--	--	lincRNA	Annotated_lncRNA	chr15	134133581	134140304	-	2	498	152
ALDBSSCT0000004022	ALDBSSCG0000002423	--	--	lincRNA	Annotated_lncRNA	chr14	108150901	108385209	-	5	1119	231
ALDBSSCT0000011924	ALDBSSCG0000007257	--	--	lincRNA	Annotated_lncRNA	chrX	45932514	45934823	+	2	1269	170
ALDBSSCT0000007129	ALDBSSCG0000004336	--	--	lincRNA	Annotated_lncRNA	chr3	44332952	44344013	-	2	5501	123
ALDBSSCT0000010702	ALDBSSCG0000006481	--	--	lincRNA	Annotated_lncRNA	chr8	146659341	146660752	+	2	901	106
ALDBSSCT0000010729	ALDBSSCG0000006491	--	--	lincRNA	Annotated_lncRNA	chr8	946562	952538	-	2	1838	128
ALDBSSCT0000009358	ALDBSSCG0000005711	--	--	lincRNA	Annotated_lncRNA	chr6	56802933	56804760	-	2	1260	75
ALDBSSCT0000011771	ALDBSSCG0000007136	--	--	lincRNA	Annotated_lncRNA	chr9	148558387	148568813	-	4	3407	132
ALDBSSCT0000011772	ALDBSSCG0000007136	--	--	lincRNA	Annotated_lncRNA	chr9	148558387	148568813	-	3	3363	132
ALDBSSCT0000005637	ALDBSSCG0000003416	--	--	lincRNA	Annotated_lncRNA	chr18	7715212	7715795	-	2	323	47
ALDBSSCT0000008802	ALDBSSCG0000005376	--	--	lincRNA	Annotated_lncRNA	chr6	39774940	39777125	+	2	1503	222
ALDBSSCT0000004006	ALDBSSCG0000002414	--	--	lincRNA	Annotated_lncRNA	chr14	96079984	96099409	-	5	450	70
ENSSSCT00000033402	ENSSSCG00000030758	DEFB-104L	-	processed_transcript	Annotated_lncRNA	chr15	43209020	43211863	+	2	564	91
ALDBSSCT0000004000	ALDBSSCG0000002411	--	--	lincRNA	Annotated_lncRNA	chr14	95282526	95283754	-	2	1223	61
ALDBSSCT0000003796	ALDBSSCG0000002279	--	--	lincRNA	Annotated_lncRNA	chr14	3720395	3721019	-	2	620	83
ALDBSSCT0000000037	ALDBSSCG0000000021	--	--	lincRNA	Annotated_lncRNA	chr1	10150406	10235063	+	3	357	64
ALDBSSCT0000003640	ALDBSSCG0000002179	--	--	lincRNA	Annotated_lncRNA	chr14	72365229	72404386	+	3	4492	173
ENSSSCT00000016750	ENSSSCG00000015375	ITGB8	-	processed_transcript	Annotated_lncRNA	chr9	98589971	98766514	+	14	2708	843
ALDBSSCT0000006331	ALDBSSCG0000003873	--	--	lincRNA	Annotated_lncRNA	chr2	78646981	78648650	-	3	601	200
ALDBSSCT0000003811	ALDBSSCG0000002292	--	--	lincRNA	Annotated_lncRNA	chr14	15969023	15994782	-	4	941	194
ALDBSSCT0000004228	ALDBSSCG0000002558	--	--	lincRNA	Annotated_lncRNA	chr15	82629363	82905734	+	2	1451	88
ALDBSSCT0000004229	ALDBSSCG0000002559	--	--	lincRNA	Annotated_lncRNA	chr15	83152191	83301045	+	3	412	105
ALDBSSCT0000004340	ALDBSSCG0000002627	--	--	lincRNA	Annotated_lncRNA	chr15	142103242	142153473	+	3	1981	108
ALDBSSCT0000004345	ALDBSSCG0000002632	--	--	lincRNA	Annotated_lncRNA	chr15	145073723	145100991	+	5	941	123
ALDBSSCT0000004344	ALDBSSCG0000002631	--	--	lincRNA	Annotated_lncRNA	chr15	144814220	144829051	+	2	357	104
ALDBSSCT0000009353	ALDBSSCG0000005707	--	--	lincRNA	Annotated_lncRNA	chr6	56163372	56165498	-	2	1380	166
ALDBSSCT0000011365	ALDBSSCG0000006904	--	--	lincRNA	Annotated_lncRNA	chr9	142137537	142144029	+	2	1592	99
ALDBSSCT0000005795	ALDBSSCG0000003520	--	--	lincRNA	Annotated_lncRNA	chr2	7041010	7042905	+	2	1723	125
ALDBSSCT0000005026	ALDBSSCG0000003032	--	--	lincRNA	Annotated_lncRNA	chr16	61508547	61605751	-	2	724	184
ALDBSSCT0000005146	ALDBSSCG0000003101	--	--	lincRNA	Annotated_lncRNA	chr17	32125641	32136649	+	2	8193	219
ALDBSSCT0000009422	ALDBSSCG0000005746	--	--	lincRNA	Annotated_lncRNA	chr6	74416993	74418325	-	2	475	75
ALDBSSCT0000001034	ALDBSSCG0000000638	--	--	lincRNA	Annotated_lncRNA	chr1	284489838	284491434	-	2	561	79
ALDBSSCT0000001035	ALDBSSCG0000000639	--	--	lincRNA	Annotated_lncRNA	chr1	284505334	284511948	-	3	321	84
ALDBSSCT0000000957	ALDBSSCG0000000587	--	--	lincRNA	Annotated_lncRNA	chr1	230548858	230554093	-	2	332	80
ALDBSSCT0000009896	ALDBSSCG0000006019	--	--	lincRNA	Annotated_lncRNA	chr7	101613261	101641725	+	2	642	136
ALDBSSCT0000009897	ALDBSSCG0000006020	--	--	lincRNA	Annotated_lncRNA	chr7	101836641	101850076	+	2	5471	205
ALDBSSCT0000009898	ALDBSSCG0000006021	--	--	lincRNA	Annotated_lncRNA	chr7	102526650	102562327	+	2	771	140
ALDBSSCT0000001134	ALDBSSCG0000000703	--	--	lincRNA	Annotated_lncRNA	chr10	14763728	14795679	+	4	2333	105
ALDBSSCT0000009463	ALDBSSCG0000005772	--	--	lincRNA	Annotated_lncRNA	chr6	93348595	93353660	-	2	3458	205
ALDBSSCT0000001132	ALDBSSCG0000000703	--	--	lincRNA	Annotated_lncRNA	chr10	14763689	14795679	+	4	2484	105
ALDBSSCT0000001131	ALDBSSCG0000000703	--	--	lincRNA	Annotated_lncRNA	chr10	14763409	14810188	+	4	5931	165
ALDBSSCT0000009795	ALDBSSCG0000005972	--	--	lincRNA	Annotated_lncRNA	chr7	60751990	60801781	+	5	430	84
ALDBSSCT0000010074	ALDBSSCG0000006132	--	--	lincRNA	Annotated_lncRNA	chr7	20603368	20638957	-	2	247	73
ALDBSSCT0000010076	ALDBSSCG0000006134	--	--	lincRNA	Annotated_lncRNA	chr7	21305409	21451577	-	3	299	97
ALDBSSCT0000011078	ALDBSSCG0000006722	--	--	lincRNA	Annotated_lncRNA	chr9	10261681	10263704	+	2	868	103
ALDBSSCT0000011077	ALDBSSCG0000006721	--	--	lincRNA	Annotated_lncRNA	chr9	10099106	10103058	+	2	2798	161
ALDBSSCT0000011594	ALDBSSCG0000007039	--	--	lincRNA	Annotated_lncRNA	chr9	79701694	79714180	-	3	397	66
ALDBSSCT0000007239	ALDBSSCG0000004392	--	--	lincRNA	Annotated_lncRNA	chr3	83852624	83867867	-	4	849	83
ALDBSSCT0000008636	ALDBSSCG0000005256	--	--	lincRNA	Annotated_lncRNA	chr5	82959879	82960705	-	2	791	52
ALDBSSCT0000005260	ALDBSSCG0000003173	--	--	lincRNA	Annotated_lncRNA	chr17	67415361	67417833	+	2	1842	111
ALDBSSCT0000000320	ALDBSSCG0000000186	--	--	lincRNA	Annotated_lncRNA	chr1	155395789	155403534	+	3	865	237
ALDBSSCT0000009557	ALDBSSCG0000005828	--	--	lincRNA	Annotated_lncRNA	chr6	145891789	145892556	-	2	349	80
ALDBSSCT0000003990	ALDBSSCG0000002401	--	--	lincRNA	Annotated_lncRNA	chr14	84030930	84033527	-	2	2272	144
ALDBSSCT0000011482	ALDBSSCG0000006989	--	--	lincRNA	Annotated_lncRNA	chr9	40835708	40837691	-	2	1725	94
ALDBSSCT0000000248	ALDBSSCG0000000145	--	--	lincRNA	Annotated_lncRNA	chr1	125760979	125765857	+	2	393	76
ALDBSSCT0000000326	ALDBSSCG0000000190	--	--	lincRNA	Annotated_lncRNA	chr1	163117061	163154667	+	3	337	81
ALDBSSCT0000000247	ALDBSSCG0000000144	--	--	lincRNA	Annotated_lncRNA	chr1	124942920	124944948	+	2	647	66
ALDBSSCT0000003928	ALDBSSCG0000002363	--	--	lincRNA	Annotated_lncRNA	chr14	58486483	58496124	-	4	5325	128
ALDBSSCT0000009147	ALDBSSCG0000005576	--	--	lincRNA	Annotated_lncRNA	chr6	147804751	147834388	+	2	342	66
ALDBSSCT0000010760	ALDBSSCG0000006513	--	--	lincRNA	Annotated_lncRNA	chr8	10167080	10183637	-	2	684	69
ALDBSSCT0000009009	ALDBSSCG0000005505	--	--	lincRNA	Annotated_lncRNA	chr6	94573667	94724597	+	2	379	126
ALDBSSCT0000002506	ALDBSSCG0000001514	--	--	lincRNA	Annotated_lncRNA	chr12	55895278	55901389	-	3	2159	88
ALDBSSCT0000006641	ALDBSSCG0000004062	--	--	lincRNA	Annotated_lncRNA	chr3	38882297	38884454	+	2	681	99
ALDBSSCT0000001256	ALDBSSCG0000000761	--	--	lincRNA	Annotated_lncRNA	chr10	49906993	49908735	+	2	1737	128
ALDBSSCT0000011872	ALDBSSCG0000007218	--	--	lincRNA	Annotated_lncRNA	JH118724.1	89268	94343	+	2	2716	96
ENSSSCT00000009298	ENSSSCG00000008496	EIF2AK2	-	processed_transcript	Annotated_lncRNA	chr3	109647099	109667347	+	8	937	304
ALDBSSCT0000006646	ALDBSSCG0000004065	--	--	lincRNA	Annotated_lncRNA	chr3	40058933	40063268	+	2	222	73
ALDBSSCT0000006648	ALDBSSCG0000004066	--	--	lincRNA	Annotated_lncRNA	chr3	40137456	40139808	+	2	749	186
ALDBSSCT0000001143	ALDBSSCG0000000707	--	--	lincRNA	Annotated_lncRNA	chr10	16862788	16869950	+	4	390	77
ALDBSSCT0000001140	ALDBSSCG0000000704	--	--	lincRNA	Annotated_lncRNA	chr10	14879713	14880881	+	2	595	65
ALDBSSCT0000003518	ALDBSSCG0000002117	--	--	lincRNA	Annotated_lncRNA	chr14	30760116	30770986	+	2	9696	206
ALDBSSCT0000005568	ALDBSSCG0000003370	--	--	lincRNA	Annotated_lncRNA	chr18	53406194	53422408	+	4	1648	297
ALDBSSCT0000001144	ALDBSSCG0000000708	--	--	lincRNA	Annotated_lncRNA	chr10	19673321	19675520	+	2	1606	160
ALDBSSCT0000006043	ALDBSSCG0000003699	--	--	lincRNA	Annotated_lncRNA	chr2	140258327	140267757	+	2	449	123
ENSSSCT00000004012	ENSSSCG00000003617	TXLNA	-	processed_transcript	Annotated_lncRNA	chr6	82743348	82758576	+	11	4812	592
ALDBSSCT0000001965	ALDBSSCG0000001184	--	--	lincRNA	Annotated_lncRNA	chr11	24670348	24671751	-	2	884	256
ENSSSCT00000020380	ENSSSCG00000018785	7SK	7SK RNA [Source:RFAM;Acc:RF00100]	misc_RNA	Annotated_lncRNA	chr18	10922817	10923116	-	1	300	66
ALDBSSCT0000001627	ALDBSSCG0000000986	--	--	lincRNA	Annotated_lncRNA	chr10	76934566	76936080	-	2	1078	71
ENSSSCT00000034287	ENSSSCG00000001396	SLA-8	-	processed_transcript	Annotated_lncRNA	chr7	27626975	27627652	-	2	541	66
ALDBSSCT0000003250	ALDBSSCG0000001959	--	--	lincRNA	Annotated_lncRNA	chr13	120032423	120034875	-	2	1794	71
ALDBSSCT0000001628	ALDBSSCG0000000987	--	--	lincRNA	Annotated_lncRNA	chr10	77611515	77624358	-	3	1366	138
ALDBSSCT0000001969	ALDBSSCG0000001187	--	--	lincRNA	Annotated_lncRNA	chr11	25665578	25667673	-	2	1406	198
ALDBSSCT0000000864	ALDBSSCG0000000525	--	--	lincRNA	Annotated_lncRNA	chr1	163409501	163413651	-	3	1743	219
ENSSSCT00000033169	ENSSSCG00000030936	CH242-154K8.2	-	processed_transcript	Annotated_lncRNA	chrX	109585808	109620212	+	5	392	96
ENSSSCT00000021277	ENSSSCG00000019682	7SK	7SK RNA [Source:RFAM;Acc:RF00100]	misc_RNA	Annotated_lncRNA	chr14	115787973	115788244	-	1	272	90
ALDBSSCT0000006115	ALDBSSCG0000003737	--	--	lincRNA	Annotated_lncRNA	chr2	1537916	1539497	-	2	361	120
ALDBSSCT0000000847	ALDBSSCG0000000512	--	--	lincRNA	Annotated_lncRNA	chr1	154049974	154057648	-	2	737	106
ALDBSSCT0000007986	ALDBSSCG0000004842	--	--	lincRNA	Annotated_lncRNA	chr4	77200618	77206897	-	4	878	121
ENSSSCT00000020156	ENSSSCG00000018561	7SK	7SK RNA [Source:RFAM;Acc:RF00100]	misc_RNA	Annotated_lncRNA	chr18	15956591	15956900	-	1	310	76
ALDBSSCT0000006055	ALDBSSCG0000003709	--	--	lincRNA	Annotated_lncRNA	chr2	146225357	146226000	+	2	633	77
ALDBSSCT0000009078	ALDBSSCG0000005540	--	--	lincRNA	Annotated_lncRNA	chr6	125496907	125500573	+	3	1891	107
ALDBSSCT0000007987	ALDBSSCG0000004842	--	--	lincRNA	Annotated_lncRNA	chr4	77200618	77206897	-	3	732	121
ALDBSSCT0000006050	ALDBSSCG0000003704	--	--	lincRNA	Annotated_lncRNA	chr2	143690799	143695335	+	3	2598	126
ALDBSSCT0000011395	ALDBSSCG0000006929	--	--	lincRNA	Annotated_lncRNA	chr9	874948	887542	-	2	247	82
ALDBSSCT0000009596	ALDBSSCG0000005855	--	--	lincRNA	Annotated_lncRNA	chr6	156859307	156868028	-	2	8289	243
ALDBSSCT0000004138	ALDBSSCG0000002492	--	--	lincRNA	Annotated_lncRNA	chr15	10446850	10496988	+	2	383	127
ALDBSSCT0000006449	ALDBSSCG0000003935	--	--	lincRNA	Annotated_lncRNA	chr2	139002841	139005003	-	2	907	146
ALDBSSCT0000006886	ALDBSSCG0000004197	--	--	lincRNA	Annotated_lncRNA	chr3	126848179	127113693	+	5	1064	89
ALDBSSCT0000005842	ALDBSSCG0000003551	--	--	lincRNA	Annotated_lncRNA	chr2	22296696	22763287	+	3	962	95
ALDBSSCT0000008279	ALDBSSCG0000005026	--	--	lincRNA	Annotated_lncRNA	chr5	19722857	19724257	+	3	893	136
ALDBSSCT0000003314	ALDBSSCG0000001994	--	--	lincRNA	Annotated_lncRNA	chr13	146709329	146714480	-	2	4506	164
ALDBSSCT0000009890	ALDBSSCG0000006015	--	--	lincRNA	Annotated_lncRNA	chr7	99671210	99672333	+	3	693	179
ALDBSSCT0000006770	ALDBSSCG0000004134	--	--	lincRNA	Annotated_lncRNA	chr3	81479785	81494578	+	5	5715	128
ENSSSCT00000017310	ENSSSCG00000015897	IFIH1	-	processed_transcript	Annotated_lncRNA	chr15	76423089	76477401	-	16	3720	1059
ALDBSSCT0000008272	ALDBSSCG0000005020	--	--	lincRNA	Annotated_lncRNA	chr5	15824342	15854639	+	2	323	87
ALDBSSCT0000006765	ALDBSSCG0000004132	--	--	lincRNA	Annotated_lncRNA	chr3	80337100	80339281	+	4	752	132
ALDBSSCT0000008379	ALDBSSCG0000005091	--	--	lincRNA	Annotated_lncRNA	chr5	78998331	79090876	+	2	1339	132
ALDBSSCT0000002828	ALDBSSCG0000001722	--	--	lincRNA	Annotated_lncRNA	chr13	141400753	141422922	+	3	964	94
ALDBSSCT0000002829	ALDBSSCG0000001723	--	--	lincRNA	Annotated_lncRNA	chr13	142784611	142787041	+	2	2278	123
ALDBSSCT0000008485	ALDBSSCG0000005159	--	--	lincRNA	Annotated_lncRNA	chr5	4158494	4163324	-	2	587	81
ALDBSSCT0000001242	ALDBSSCG0000000754	--	--	lincRNA	Annotated_lncRNA	chr10	46273264	46291605	+	5	461	105
ALDBSSCT0000011934	ALDBSSCG0000007263	--	--	lincRNA	Annotated_lncRNA	chrX	55266278	55275391	+	2	3921	338
ALDBSSCT0000001711	ALDBSSCG0000001032	--	--	lincRNA	Annotated_lncRNA	chr11	18208881	18210956	+	2	1203	71
ALDBSSCT0000008100	ALDBSSCG0000004915	--	--	lincRNA	Annotated_lncRNA	chr4	113095857	113096844	-	2	729	118
ALDBSSCT0000006507	ALDBSSCG0000003977	--	--	lincRNA	Annotated_lncRNA	chr2	157314487	157318413	-	3	1008	222
ALDBSSCT0000001248	ALDBSSCG0000000756	--	--	lincRNA	Annotated_lncRNA	chr10	47712356	47727977	+	7	3132	113
ALDBSSCT0000002949	ALDBSSCG0000001774	--	--	lincRNA	Annotated_lncRNA	chr13	191551193	191557483	+	2	4612	131
ALDBSSCT0000002948	ALDBSSCG0000001774	--	--	lincRNA	Annotated_lncRNA	chr13	191445218	191557483	+	3	1280	106
ALDBSSCT0000002824	ALDBSSCG0000001718	--	--	lincRNA	Annotated_lncRNA	chr13	138649081	138674419	+	2	1263	86
ALDBSSCT0000003196	ALDBSSCG0000001926	--	--	lincRNA	Annotated_lncRNA	chr13	79212399	79213825	-	3	577	192
ALDBSSCT0000001719	ALDBSSCG0000001037	--	--	lincRNA	Annotated_lncRNA	chr11	19504070	19508277	+	2	586	87
ALDBSSCT0000006500	ALDBSSCG0000003971	--	--	lincRNA	Annotated_lncRNA	chr2	153519247	153527576	-	2	4917	211
ALDBSSCT0000008293	ALDBSSCG0000005036	--	--	lincRNA	Annotated_lncRNA	chr5	26710368	26807270	+	3	279	47
ALDBSSCT0000003741	ALDBSSCG0000002240	--	--	lincRNA	Annotated_lncRNA	chr14	123490029	123491347	+	2	1176	391
ALDBSSCT0000008299	ALDBSSCG0000005041	--	--	lincRNA	Annotated_lncRNA	chr5	35847668	35852074	+	2	653	106
ALDBSSCT0000002615	ALDBSSCG0000001588	--	--	lincRNA	Annotated_lncRNA	chr13	34300042	34344157	+	4	1719	141
ALDBSSCT0000002612	ALDBSSCG0000001588	--	--	lincRNA	Annotated_lncRNA	chr13	34299932	34309880	+	3	1294	155
ALDBSSCT0000010483	ALDBSSCG0000006362	--	--	lincRNA	Annotated_lncRNA	chr8	58176086	58181933	+	2	256	57
ALDBSSCT0000002346	ALDBSSCG0000001420	--	--	lincRNA	Annotated_lncRNA	chr12	5466920	5467490	-	2	250	71
ALDBSSCT0000005939	ALDBSSCG0000003629	--	--	lincRNA	Annotated_lncRNA	chr2	81298320	81299971	+	2	237	79
ALDBSSCT0000008263	ALDBSSCG0000005013	--	--	lincRNA	Annotated_lncRNA	chr5	13220029	13223917	+	3	505	136
ALDBSSCT0000008750	ALDBSSCG0000005341	--	--	lincRNA	Annotated_lncRNA	chr6	16387919	16400028	+	2	1493	106
ALDBSSCT0000006659	ALDBSSCG0000004072	--	--	lincRNA	Annotated_lncRNA	chr3	40600707	40602602	+	2	1223	189
ALDBSSCT0000008753	ALDBSSCG0000005343	--	--	lincRNA	Annotated_lncRNA	chr6	17451781	17454219	+	2	1674	184
ALDBSSCT0000005933	ALDBSSCG0000003624	--	--	lincRNA	Annotated_lncRNA	chr2	77839217	77840164	+	2	764	174
ALDBSSCT0000005932	ALDBSSCG0000003623	--	--	lincRNA	Annotated_lncRNA	chr2	77764461	77776005	+	2	244	81
ALDBSSCT0000000532	ALDBSSCG0000000314	--	--	lincRNA	Annotated_lncRNA	chr1	292997929	292999509	+	2	1469	81
ALDBSSCT0000005935	ALDBSSCG0000003625	--	--	lincRNA	Annotated_lncRNA	chr2	78292573	78293517	+	2	614	204
ENSSSCT00000031317	ENSSSCG00000020977	SH3BGRL	-	processed_transcript	Annotated_lncRNA	chrX	74389847	74404857	-	3	352	99
ALDBSSCT0000007758	ALDBSSCG0000004709	--	--	lincRNA	Annotated_lncRNA	chr4	139078124	139093196	+	4	6983	248
ALDBSSCT0000007692	ALDBSSCG0000004671	--	--	lincRNA	Annotated_lncRNA	chr4	119863677	119875288	+	2	1338	71
ALDBSSCT0000000533	ALDBSSCG0000000315	--	--	lincRNA	Annotated_lncRNA	chr1	293274258	293285840	+	2	963	141
ALDBSSCT0000009711	ALDBSSCG0000005932	--	--	lincRNA	Annotated_lncRNA	chr7	35767615	35769635	+	2	1041	141
ALDBSSCT0000010558	ALDBSSCG0000006404	--	--	lincRNA	Annotated_lncRNA	chr8	90009532	90463739	+	4	403	97
ALDBSSCT0000007750	ALDBSSCG0000004703	--	--	lincRNA	Annotated_lncRNA	chr4	137324349	137327602	+	3	906	107
ALDBSSCT0000008839	ALDBSSCG0000005400	--	--	lincRNA	Annotated_lncRNA	chr6	46615906	46619200	+	3	562	89
ALDBSSCT0000007754	ALDBSSCG0000004706	--	--	lincRNA	Annotated_lncRNA	chr4	138625805	138629165	+	3	1611	160
ALDBSSCT0000008195	ALDBSSCG0000004977	--	--	lincRNA	Annotated_lncRNA	chr4	139669160	139676556	-	3	838	173
ALDBSSCT0000007283	ALDBSSCG0000004415	--	--	lincRNA	Annotated_lncRNA	chr3	103341891	103344994	-	2	1097	224
ALDBSSCT0000006471	ALDBSSCG0000003949	--	--	lincRNA	Annotated_lncRNA	chr2	145254894	145255887	-	2	382	127
ALDBSSCT0000003360	ALDBSSCG0000002020	--	--	lincRNA	Annotated_lncRNA	chr13	170385985	170412296	-	3	368	84
ALDBSSCT0000009211	ALDBSSCG0000005612	--	--	lincRNA	Annotated_lncRNA	chr6	7393234	7394317	-	2	849	102
ALDBSSCT0000008852	ALDBSSCG0000005407	--	--	lincRNA	Annotated_lncRNA	chr6	48552132	48553912	+	2	1339	94
ALDBSSCT0000000561	ALDBSSCG0000000332	--	--	lincRNA	Annotated_lncRNA	chr1	306016624	306017621	+	2	762	124
ALDBSSCT0000000560	ALDBSSCG0000000331	--	--	lincRNA	Annotated_lncRNA	chr1	304146272	304173254	+	2	513	171
ALDBSSCT0000003441	ALDBSSCG0000002074	--	--	lincRNA	Annotated_lncRNA	chr14	417607	505298	+	4	496	78
ALDBSSCT0000003638	ALDBSSCG0000002178	--	--	lincRNA	Annotated_lncRNA	chr14	72253650	72254927	+	2	724	125
ALDBSSCT0000009351	ALDBSSCG0000005705	--	--	lincRNA	Annotated_lncRNA	chr6	54671990	54677914	-	2	5297	166
ALDBSSCT0000009350	ALDBSSCG0000005704	--	--	lincRNA	Annotated_lncRNA	chr6	54492727	54493920	-	2	239	79
ALDBSSCT0000002468	ALDBSSCG0000001493	--	--	lincRNA	Annotated_lncRNA	chr12	46119846	46120630	-	2	766	125
ALDBSSCT0000003992	ALDBSSCG0000002403	--	--	lincRNA	Annotated_lncRNA	chr14	86349853	86352208	-	2	2351	133
ALDBSSCT0000000910	ALDBSSCG0000000556	--	--	lincRNA	Annotated_lncRNA	chr1	204871942	204878724	-	2	1751	120
ALDBSSCT0000000911	ALDBSSCG0000000557	--	--	lincRNA	Annotated_lncRNA	chr1	205104993	205124296	-	2	226	74
ALDBSSCT0000000444	ALDBSSCG0000000267	--	--	lincRNA	Annotated_lncRNA	chr1	238398022	238507678	+	2	317	97
ALDBSSCT0000000445	ALDBSSCG0000000268	--	--	lincRNA	Annotated_lncRNA	chr1	241169650	241171115	+	2	1163	116
ALDBSSCT0000000914	ALDBSSCG0000000560	--	--	lincRNA	Annotated_lncRNA	chr1	206904042	206908648	-	2	1710	95
ALDBSSCT0000000915	ALDBSSCG0000000561	--	--	lincRNA	Annotated_lncRNA	chr1	207097049	207102386	-	2	513	109
ALDBSSCT0000000448	ALDBSSCG0000000271	--	--	lincRNA	Annotated_lncRNA	chr1	245181701	245200074	+	3	2658	129
ALDBSSCT0000000449	ALDBSSCG0000000271	--	--	lincRNA	Annotated_lncRNA	chr1	245181817	245237825	+	6	2700	125
ALDBSSCT0000007883	ALDBSSCG0000004771	--	--	lincRNA	Annotated_lncRNA	chr4	12643527	12732532	-	2	327	109
ENSSSCT00000004790	ENSSSCG00000004334	MAP3K7	-	processed_transcript	Annotated_lncRNA	chr1	65479754	65542430	-	20	1821	606
ALDBSSCT0000007885	ALDBSSCG0000004773	--	--	lincRNA	Annotated_lncRNA	chr4	15039947	15043154	-	3	592	101
ALDBSSCT0000011054	ALDBSSCG0000006710	--	--	lincRNA	Annotated_lncRNA	chr9	6145060	6145925	+	2	861	92
ALDBSSCT0000000967	ALDBSSCG0000000594	--	--	lincRNA	Annotated_lncRNA	chr1	245115120	245127223	-	4	611	86
ALDBSSCT0000000966	ALDBSSCG0000000593	--	--	lincRNA	Annotated_lncRNA	chr1	243274322	243293444	-	2	240	59
ALDBSSCT0000000965	ALDBSSCG0000000592	--	--	lincRNA	Annotated_lncRNA	chr1	242836553	242837711	-	2	772	228
ALDBSSCT0000011702	ALDBSSCG0000007106	--	--	lincRNA	Annotated_lncRNA	chr9	134651174	134669821	-	2	436	79
ENSSSCT00000036555	ENSSSCG00000004334	MAP3K7	-	processed_transcript	Annotated_lncRNA	chr1	65478905	65542577	-	17	2818	414
ALDBSSCT0000010520	ALDBSSCG0000006381	--	--	lincRNA	Annotated_lncRNA	chr8	77564461	77573255	+	2	655	139
ALDBSSCT0000010521	ALDBSSCG0000006381	--	--	lincRNA	Annotated_lncRNA	chr8	77564754	77573255	+	3	449	112
ALDBSSCT0000002183	ALDBSSCG0000001305	--	--	lincRNA	Annotated_lncRNA	chr12	14864324	14869427	+	2	2257	155
ALDBSSCT0000010255	ALDBSSCG0000006234	--	--	lincRNA	Annotated_lncRNA	chr7	92004978	92018623	-	6	5097	89
ALDBSSCT0000009894	ALDBSSCG0000006017	--	--	lincRNA	Annotated_lncRNA	chr7	100864492	100867060	+	2	2467	88
ALDBSSCT0000011825	ALDBSSCG0000007180	--	--	lincRNA	Annotated_lncRNA	GL894574.1	67406	73081	+	2	460	102
ALDBSSCT0000010911	ALDBSSCG0000006613	--	--	lincRNA	Annotated_lncRNA	chr8	88142023	88143142	-	2	294	64
ALDBSSCT0000011708	ALDBSSCG0000007107	--	--	lincRNA	Annotated_lncRNA	chr9	134731661	134733751	-	4	918	134
ALDBSSCT0000011475	ALDBSSCG0000006983	--	--	lincRNA	Annotated_lncRNA	chr9	32373825	32375617	-	2	1788	137
ALDBSSCT0000001764	ALDBSSCG0000001071	--	--	lincRNA	Annotated_lncRNA	chr11	62423534	62729891	+	3	684	83
ENSSSCT00000020906	ENSSSCG00000019311	7SK	7SK RNA [Source:RFAM;Acc:RF00100]	misc_RNA	Annotated_lncRNA	chr9	11426949	11427253	+	1	305	85
ENSSSCT00000033304	ENSSSCG00000015579	PTGS2	-	processed_transcript	Annotated_lncRNA	chr9	140251518	140260362	-	10	3755	406
ALDBSSCT0000004160	ALDBSSCG0000002511	--	--	lincRNA	Annotated_lncRNA	chr15	34935634	34937734	+	2	282	86
ALDBSSCT0000001258	ALDBSSCG0000000763	--	--	lincRNA	Annotated_lncRNA	chr10	51940698	51944511	+	2	2825	152
ALDBSSCT0000001404	ALDBSSCG0000000854	--	--	lincRNA	Annotated_lncRNA	chr10	13117133	13422754	-	6	2879	121
ALDBSSCT0000008539	ALDBSSCG0000005199	--	--	lincRNA	Annotated_lncRNA	chr5	30063566	30071684	-	2	4434	164
ENSSSCT00000006551	ENSSSCG00000005968	CU463271.1	-	processed_transcript	Annotated_lncRNA	chr4	14948785	14973488	-	4	580	95
ALDBSSCT0000011463	ALDBSSCG0000006974	--	--	lincRNA	Annotated_lncRNA	chr9	21859589	21863291	-	2	1942	92
ALDBSSCT0000005349	ALDBSSCG0000003236	--	--	lincRNA	Annotated_lncRNA	chr17	42398249	42405006	-	2	2058	134
ALDBSSCT0000004309	ALDBSSCG0000002607	--	--	lincRNA	Annotated_lncRNA	chr15	123833699	123913010	+	2	270	90
ALDBSSCT0000009842	ALDBSSCG0000005993	--	--	lincRNA	Annotated_lncRNA	chr7	80975985	80978808	+	2	2202	153
ALDBSSCT0000008530	ALDBSSCG0000005190	--	--	lincRNA	Annotated_lncRNA	chr5	23100501	23102266	-	4	1152	99
ALDBSSCT0000005697	ALDBSSCG0000003460	--	--	lincRNA	Annotated_lncRNA	chr18	40396341	40468369	-	6	5698	162
ALDBSSCT0000004305	ALDBSSCG0000002605	--	--	lincRNA	Annotated_lncRNA	chr15	121111586	121117156	+	2	2571	167
ALDBSSCT0000002005	ALDBSSCG0000001208	--	--	lincRNA	Annotated_lncRNA	chr11	56948526	56949898	-	2	1077	124
ALDBSSCT0000011057	ALDBSSCG0000006712	--	--	lincRNA	Annotated_lncRNA	chr9	7069079	7075060	+	2	262	75
ALDBSSCT0000004232	ALDBSSCG0000002562	--	--	lincRNA	Annotated_lncRNA	chr15	84356704	84365762	+	2	6342	108
ALDBSSCT0000011281	ALDBSSCG0000006849	--	--	lincRNA	Annotated_lncRNA	chr9	96318301	96392446	+	2	352	116
ALDBSSCT0000008849	ALDBSSCG0000005406	--	--	lincRNA	Annotated_lncRNA	chr6	48452344	48455032	+	4	1209	135
ALDBSSCT0000005061	ALDBSSCG0000003051	--	--	lincRNA	Annotated_lncRNA	chr16	77470201	77475286	-	2	728	86
ALDBSSCT0000003223	ALDBSSCG0000001939	--	--	lincRNA	Annotated_lncRNA	chr13	88030178	88030798	-	2	566	43
ALDBSSCT0000002761	ALDBSSCG0000001674	--	--	lincRNA	Annotated_lncRNA	chr13	111049443	111051195	+	2	1141	135
ALDBSSCT0000010952	ALDBSSCG0000006638	--	--	lincRNA	Annotated_lncRNA	chr8	109091962	109094082	-	2	677	87
ALDBSSCT0000011289	ALDBSSCG0000006855	--	--	lincRNA	Annotated_lncRNA	chr9	105305540	105371873	+	3	450	62
ALDBSSCT0000008153	ALDBSSCG0000004949	--	--	lincRNA	Annotated_lncRNA	chr4	129236993	129237473	-	2	475	70
ALDBSSCT0000009851	ALDBSSCG0000005995	--	--	lincRNA	Annotated_lncRNA	chr7	83582110	83590777	+	4	617	73
ALDBSSCT0000011469	ALDBSSCG0000006979	--	--	lincRNA	Annotated_lncRNA	chr9	29519120	29525703	-	2	1105	169
ALDBSSCT0000007171	ALDBSSCG0000004358	--	--	lincRNA	Annotated_lncRNA	chr3	54764201	54821564	-	3	765	140
ALDBSSCT0000005662	ALDBSSCG0000003435	--	--	lincRNA	Annotated_lncRNA	chr18	20231663	20260530	-	3	4994	155
ALDBSSCT0000011237	ALDBSSCG0000006822	--	--	lincRNA	Annotated_lncRNA	chr9	70867594	70868740	+	2	657	95
ALDBSSCT0000005660	ALDBSSCG0000003435	--	--	lincRNA	Annotated_lncRNA	chr18	20228066	20236206	-	4	476	87
ALDBSSCT0000010731	ALDBSSCG0000006492	--	--	lincRNA	Annotated_lncRNA	chr8	1457474	1458292	-	2	642	138
ALDBSSCT0000003732	ALDBSSCG0000002234	--	--	lincRNA	Annotated_lncRNA	chr14	118574536	118578562	+	3	1827	152
ALDBSSCT0000007276	ALDBSSCG0000004410	--	--	lincRNA	Annotated_lncRNA	chr3	100972901	100973519	-	2	417	124
ALDBSSCT0000007178	ALDBSSCG0000004363	--	--	lincRNA	Annotated_lncRNA	chr3	59512427	59513326	-	2	867	124
ALDBSSCT0000006386	ALDBSSCG0000003905	--	--	lincRNA	Annotated_lncRNA	chr2	103686258	103826798	-	5	1749	132
ALDBSSCT0000007272	ALDBSSCG0000004407	--	--	lincRNA	Annotated_lncRNA	chr3	100311745	100332163	-	2	608	135
ALDBSSCT0000003843	ALDBSSCG0000002310	--	--	lincRNA	Annotated_lncRNA	chr14	30747065	30748457	-	4	485	139
ALDBSSCT0000003842	ALDBSSCG0000002309	--	--	lincRNA	Annotated_lncRNA	chr14	30728126	30729184	-	3	818	70
ALDBSSCT0000007409	ALDBSSCG0000004489	--	--	lincRNA	Annotated_lncRNA	chr4	998208	1005683	+	2	5020	228
ALDBSSCT0000003968	ALDBSSCG0000002390	--	--	lincRNA	Annotated_lncRNA	chr14	71960121	71964828	-	2	711	77
ALDBSSCT0000007405	ALDBSSCG0000004487	--	--	lincRNA	Annotated_lncRNA	chr4	187111	193797	+	3	1244	145
ALDBSSCT0000009323	ALDBSSCG0000005685	--	--	lincRNA	Annotated_lncRNA	chr6	46525874	46534549	-	2	7846	128
ALDBSSCT0000009759	ALDBSSCG0000005956	--	--	lincRNA	Annotated_lncRNA	chr7	48191272	48197222	+	3	1308	203
ALDBSSCT0000000366	ALDBSSCG0000000220	--	--	lincRNA	Annotated_lncRNA	chr1	185125064	185153008	+	2	338	111
ALDBSSCT0000003416	ALDBSSCG0000002055	--	--	lincRNA	Annotated_lncRNA	chr13	210988725	210991362	-	2	2630	147
ALDBSSCT0000000049	ALDBSSCG0000000030	--	--	lincRNA	Annotated_lncRNA	chr1	13726855	13756905	+	3	499	104
ALDBSSCT0000007403	ALDBSSCG0000004487	--	--	lincRNA	Annotated_lncRNA	chr4	187015	193797	+	3	1716	153
ALDBSSCT0000011669	ALDBSSCG0000007084	--	--	lincRNA	Annotated_lncRNA	chr9	126100864	126103439	-	2	1026	86
ALDBSSCT0000004578	ALDBSSCG0000002782	--	--	lincRNA	Annotated_lncRNA	chr15	116425426	116435610	-	3	581	193
ALDBSSCT0000004271	ALDBSSCG0000002586	--	--	lincRNA	Annotated_lncRNA	chr15	107672650	107714888	+	4	1301	120
ALDBSSCT0000009923	ALDBSSCG0000006042	--	--	lincRNA	Annotated_lncRNA	chr7	114362057	114364091	+	2	698	116
ALDBSSCT0000012041	ALDBSSCG0000007340	--	--	lincRNA	Annotated_lncRNA	chrX	68862692	68870587	-	2	3515	122
ALDBSSCT0000005886	ALDBSSCG0000003588	--	--	lincRNA	Annotated_lncRNA	chr2	51984530	52003458	+	2	384	90
ALDBSSCT0000005111	ALDBSSCG0000003076	--	--	lincRNA	Annotated_lncRNA	chr17	888988	889467	+	2	322	107
ENSSSCT00000005081	ENSSSCG00000004600	CH242-58J12.2	-	processed_transcript	Annotated_lncRNA	chr1	126842175	127433537	-	19	5982	686
ENSSSCT00000033774	ENSSSCG00000030777	SBAB-548A10.9	-	processed_transcript	Annotated_lncRNA	chr7	27543864	27546194	-	3	406	92
ENSSSCT00000036045	ENSSSCG00000004943	MAP2K1	-	processed_transcript	Annotated_lncRNA	chr1	182187872	182222849	-	8	1423	247
ALDBSSCT0000006728	ALDBSSCG0000004104	--	--	lincRNA	Annotated_lncRNA	chr3	56417412	56446272	+	5	10576	202
ALDBSSCT0000002208	ALDBSSCG0000001321	--	--	lincRNA	Annotated_lncRNA	chr12	19303316	19313609	+	3	919	202
ALDBSSCT0000005525	ALDBSSCG0000003350	--	--	lincRNA	Annotated_lncRNA	chr18	42733895	42751353	+	5	656	115
ALDBSSCT0000011462	ALDBSSCG0000006974	--	--	lincRNA	Annotated_lncRNA	chr9	21859589	21861895	-	2	1273	79
ALDBSSCT0000001101	ALDBSSCG0000000683	--	--	lincRNA	Annotated_lncRNA	chr10	2449490	2495549	+	2	2855	218
ALDBSSCT0000005528	ALDBSSCG0000003351	--	--	lincRNA	Annotated_lncRNA	chr18	42892100	42914690	+	10	5447	150
ALDBSSCT0000011508	ALDBSSCG0000006998	--	--	lincRNA	Annotated_lncRNA	chr9	45276395	45307485	-	2	1322	135
ALDBSSCT0000001846	ALDBSSCG0000001112	--	--	lincRNA	Annotated_lncRNA	chr11	86623330	86632050	+	2	7611	271
ENSSSCT00000035193	ENSSSCG00000004334	MAP3K7	-	processed_transcript	Annotated_lncRNA	chr1	65478905	65542577	-	16	2737	414
ALDBSSCT0000006392	ALDBSSCG0000003905	--	--	lincRNA	Annotated_lncRNA	chr2	103773331	103826639	-	6	771	79
ALDBSSCT0000007471	ALDBSSCG0000004527	--	--	lincRNA	Annotated_lncRNA	chr4	16844942	16852536	+	2	533	137
ALDBSSCT0000011044	ALDBSSCG0000006703	--	--	lincRNA	Annotated_lncRNA	chr9	3037295	3043877	+	3	2585	91
ALDBSSCT0000008289	ALDBSSCG0000005033	--	--	lincRNA	Annotated_lncRNA	chr5	23093801	23095966	+	3	828	106
ALDBSSCT0000011515	ALDBSSCG0000007001	--	--	lincRNA	Annotated_lncRNA	chr9	46445912	46454339	-	3	2548	144
ENSSSCT00000013966	ENSSSCG00000012774	DUSP9	-	processed_transcript	Annotated_lncRNA	chrX	141972994	141977757	+	5	2243	400
ALDBSSCT0000005159	ALDBSSCG0000003112	--	--	lincRNA	Annotated_lncRNA	chr17	41261739	41270788	+	3	3174	122
ALDBSSCT0000006251	ALDBSSCG0000003817	--	--	lincRNA	Annotated_lncRNA	chr2	36648994	36708549	-	4	720	105
ALDBSSCT0000009919	ALDBSSCG0000006039	--	--	lincRNA	Annotated_lncRNA	chr7	110021314	110021777	+	2	443	77
ALDBSSCT0000004908	ALDBSSCG0000002974	--	--	lincRNA	Annotated_lncRNA	chr16	25729029	25732546	-	3	464	81
ALDBSSCT0000002460	ALDBSSCG0000001489	--	--	lincRNA	Annotated_lncRNA	chr12	45147537	45152031	-	4	952	153
ALDBSSCT0000002357	ALDBSSCG0000001428	--	--	lincRNA	Annotated_lncRNA	chr12	8816348	8820550	-	2	2716	158
ALDBSSCT0000002482	ALDBSSCG0000001501	--	--	lincRNA	Annotated_lncRNA	chr12	52123887	52125550	-	2	1655	135
ALDBSSCT0000002483	ALDBSSCG0000001502	--	--	lincRNA	Annotated_lncRNA	chr12	52708852	52722946	-	2	876	89
ALDBSSCT0000006152	ALDBSSCG0000003760	--	--	lincRNA	Annotated_lncRNA	chr2	5934247	5945085	-	4	10036	160
ALDBSSCT0000001996	ALDBSSCG0000001205	--	--	lincRNA	Annotated_lncRNA	chr11	56092171	56096454	-	2	705	59
ALDBSSCT0000002804	ALDBSSCG0000001704	--	--	lincRNA	Annotated_lncRNA	chr13	129965445	129967652	+	2	1641	115
ALDBSSCT0000007534	ALDBSSCG0000004571	--	--	lincRNA	Annotated_lncRNA	chr4	49544068	49557396	+	4	961	184
ENSSSCT00000035782	ENSSSCG00000031041	CU466547.1	-	processed_transcript	Annotated_lncRNA	chr4	7685582	7703448	+	2	347	115
ALDBSSCT0000006356	ALDBSSCG0000003889	--	--	lincRNA	Annotated_lncRNA	chr2	90010530	90011407	-	2	667	151
ALDBSSCT0000006143	ALDBSSCG0000003755	--	--	lincRNA	Annotated_lncRNA	chr2	5277696	5284495	-	4	665	112
ALDBSSCT0000008407	ALDBSSCG0000005106	--	--	lincRNA	Annotated_lncRNA	chr5	86263829	86268052	+	3	2301	94
ALDBSSCT0000010931	ALDBSSCG0000006631	--	--	lincRNA	Annotated_lncRNA	chr8	103683150	103684904	-	2	895	73
ALDBSSCT0000008532	ALDBSSCG0000005192	--	--	lincRNA	Annotated_lncRNA	chr5	23652207	23657322	-	2	227	51
ALDBSSCT0000008403	ALDBSSCG0000005104	--	--	lincRNA	Annotated_lncRNA	chr5	86209540	86234219	+	5	1515	102
ALDBSSCT0000007714	ALDBSSCG0000004686	--	--	lincRNA	Annotated_lncRNA	chr4	131519939	131559217	+	3	3085	117
ALDBSSCT0000004881	ALDBSSCG0000002961	--	--	lincRNA	Annotated_lncRNA	chr16	86667746	86674285	+	2	282	93
ALDBSSCT0000003099	ALDBSSCG0000001860	--	--	lincRNA	Annotated_lncRNA	chr13	31135058	31135601	-	2	537	87
ALDBSSCT0000001205	ALDBSSCG0000000740	--	--	lincRNA	Annotated_lncRNA	chr10	37536655	37571252	+	2	776	88
ALDBSSCT0000011996	ALDBSSCG0000007305	--	--	lincRNA	Annotated_lncRNA	chrX	3591681	3965556	-	8	3567	177
ALDBSSCT0000006993	ALDBSSCG0000004247	--	--	lincRNA	Annotated_lncRNA	chr3	2265918	2267867	-	2	239	55
ALDBSSCT0000007908	ALDBSSCG0000004791	--	--	lincRNA	Annotated_lncRNA	chr4	20951177	20974465	-	3	370	78
ALDBSSCT0000007222	ALDBSSCG0000004391	--	--	lincRNA	Annotated_lncRNA	chr3	83577180	83582761	-	2	626	99
ALDBSSCT0000008392	ALDBSSCG0000005102	--	--	lincRNA	Annotated_lncRNA	chr5	83903813	83905841	+	2	300	100
ALDBSSCT0000000748	ALDBSSCG0000000446	--	--	lincRNA	Annotated_lncRNA	chr1	81359760	81362619	-	2	957	95
ALDBSSCT0000006997	ALDBSSCG0000004251	--	--	lincRNA	Annotated_lncRNA	chr3	4727106	4728670	-	2	1019	182
ALDBSSCT0000008940	ALDBSSCG0000005470	--	--	lincRNA	Annotated_lncRNA	chr6	76018320	76025834	+	3	431	143
ALDBSSCT0000006024	ALDBSSCG0000003685	--	--	lincRNA	Annotated_lncRNA	chr2	131121961	131135113	+	2	735	70
ALDBSSCT0000011273	ALDBSSCG0000006843	--	--	lincRNA	Annotated_lncRNA	chr9	86173215	86194973	+	2	344	114
ALDBSSCT0000008083	ALDBSSCG0000004905	--	--	lincRNA	Annotated_lncRNA	chr4	108784575	108785508	-	2	499	113
ALDBSSCT0000001906	ALDBSSCG0000001153	--	--	lincRNA	Annotated_lncRNA	chr11	12763668	12765380	-	3	430	67
ALDBSSCT0000001293	ALDBSSCG0000000786	--	--	lincRNA	Annotated_lncRNA	chr10	61407750	61414420	+	4	645	66
ALDBSSCT0000008086	ALDBSSCG0000004908	--	--	lincRNA	Annotated_lncRNA	chr4	110221245	110255365	-	3	2100	118
ALDBSSCT0000004289	ALDBSSCG0000002598	--	--	lincRNA	Annotated_lncRNA	chr15	117382781	117384523	+	3	355	51
ALDBSSCT0000008088	ALDBSSCG0000004909	--	--	lincRNA	Annotated_lncRNA	chr4	110270405	110272230	-	3	1418	197
ALDBSSCT0000004287	ALDBSSCG0000002596	--	--	lincRNA	Annotated_lncRNA	chr15	116670054	116684632	+	3	207	49
ALDBSSCT0000003143	ALDBSSCG0000001889	--	--	lincRNA	Annotated_lncRNA	chr13	55516510	55518168	-	3	387	103
ALDBSSCT0000003145	ALDBSSCG0000001891	--	--	lincRNA	Annotated_lncRNA	chr13	55994366	56114933	-	2	2437	214
ALDBSSCT0000003146	ALDBSSCG0000001892	--	--	lincRNA	Annotated_lncRNA	chr13	58499664	58571696	-	2	510	67
ALDBSSCT0000004281	ALDBSSCG0000002593	--	--	lincRNA	Annotated_lncRNA	chr15	115151324	115236157	+	3	517	154
ALDBSSCT0000008838	ALDBSSCG0000005399	--	--	lincRNA	Annotated_lncRNA	chr6	46563210	46604364	+	2	1779	187
ALDBSSCT0000008244	ALDBSSCG0000005005	--	--	lincRNA	Annotated_lncRNA	chr5	3632849	3642673	+	2	7574	174
ALDBSSCT0000008713	ALDBSSCG0000005316	--	--	lincRNA	Annotated_lncRNA	chr6	3490505	3492061	+	2	217	72
ALDBSSCT0000001198	ALDBSSCG0000000737	--	--	lincRNA	Annotated_lncRNA	chr10	33515980	33543030	+	2	249	83
ALDBSSCT0000009858	ALDBSSCG0000005998	--	--	lincRNA	Annotated_lncRNA	chr7	89010692	89011335	+	2	277	75
ALDBSSCT0000006148	ALDBSSCG0000003759	--	--	lincRNA	Annotated_lncRNA	chr2	5804886	5806530	-	2	1160	233
ALDBSSCT0000001190	ALDBSSCG0000000734	--	--	lincRNA	Annotated_lncRNA	chr10	32180953	32183417	+	3	305	101
ALDBSSCT0000001193	ALDBSSCG0000000734	--	--	lincRNA	Annotated_lncRNA	chr10	32181177	32181772	+	2	512	134
ALDBSSCT0000001192	ALDBSSCG0000000734	--	--	lincRNA	Annotated_lncRNA	chr10	32181137	32181772	+	2	421	100
ALDBSSCT0000004127	ALDBSSCG0000002488	--	--	lincRNA	Annotated_lncRNA	chr15	8066913	8071185	+	2	2642	147
ALDBSSCT0000007728	ALDBSSCG0000004693	--	--	lincRNA	Annotated_lncRNA	chr4	135322155	135322614	+	2	444	76
ALDBSSCT0000006534	ALDBSSCG0000003995	--	--	lincRNA	Annotated_lncRNA	chr3	4639765	4648885	+	2	964	170
ALDBSSCT0000006535	ALDBSSCG0000003995	--	--	lincRNA	Annotated_lncRNA	chr3	4639765	4652450	+	3	736	170
ALDBSSCT0000001334	ALDBSSCG0000000813	--	--	lincRNA	Annotated_lncRNA	chr10	71390161	71392350	+	2	1033	152
ALDBSSCT0000000135	ALDBSSCG0000000084	--	--	lincRNA	Annotated_lncRNA	chr1	61543417	61743926	+	2	943	129
ALDBSSCT0000011986	ALDBSSCG0000007296	--	--	lincRNA	Annotated_lncRNA	chrX	139227603	139229821	+	3	682	188
ALDBSSCT0000011287	ALDBSSCG0000006854	--	--	lincRNA	Annotated_lncRNA	chr9	102529749	102535957	+	3	617	111
ALDBSSCT0000006431	ALDBSSCG0000003929	--	--	lincRNA	Annotated_lncRNA	chr2	136291041	136305126	-	2	3641	235
ALDBSSCT0000002627	ALDBSSCG0000001599	--	--	lincRNA	Annotated_lncRNA	chr13	37891687	37901101	+	3	8674	187
ALDBSSCT0000005228	ALDBSSCG0000003155	--	--	lincRNA	Annotated_lncRNA	chr17	59641934	59643806	+	2	1476	105
ALDBSSCT0000012098	ALDBSSCG0000007379	--	--	lincRNA	Annotated_lncRNA	chrX	141566971	141576764	-	3	8399	211
ALDBSSCT0000000489	ALDBSSCG0000000291	--	--	lincRNA	Annotated_lncRNA	chr1	267431652	267452659	+	2	217	72
ALDBSSCT0000002620	ALDBSSCG0000001593	--	--	lincRNA	Annotated_lncRNA	chr13	35883429	35885697	+	2	1496	115
ALDBSSCT0000002621	ALDBSSCG0000001594	--	--	lincRNA	Annotated_lncRNA	chr13	36383852	36387685	+	2	1106	105
ALDBSSCT0000000484	ALDBSSCG0000000289	--	--	lincRNA	Annotated_lncRNA	chr1	266683882	266688785	+	2	666	70
ALDBSSCT0000000485	ALDBSSCG0000000289	--	--	lincRNA	Annotated_lncRNA	chr1	266683922	266696524	+	3	583	91
ALDBSSCT0000012096	ALDBSSCG0000007377	--	--	lincRNA	Annotated_lncRNA	chrX	139089486	139090461	-	2	471	134
ALDBSSCT0000011716	ALDBSSCG0000007110	--	--	lincRNA	Annotated_lncRNA	chr9	135738153	135742351	-	2	1383	163
ALDBSSCT0000002235	ALDBSSCG0000001343	--	--	lincRNA	Annotated_lncRNA	chr12	36177551	36181774	+	2	1533	134
ALDBSSCT0000000482	ALDBSSCG0000000287	--	--	lincRNA	Annotated_lncRNA	chr1	264741509	264753018	+	2	223	74
ALDBSSCT0000008818	ALDBSSCG0000005385	--	--	lincRNA	Annotated_lncRNA	chr6	41691324	41692554	+	2	406	62
ALDBSSCT0000002305	ALDBSSCG0000001389	--	--	lincRNA	Annotated_lncRNA	chr12	61909356	61910228	+	2	687	126
ALDBSSCT0000007111	ALDBSSCG0000004327	--	--	lincRNA	Annotated_lncRNA	chr3	40257363	40259688	-	2	429	83
ALDBSSCT0000003397	ALDBSSCG0000002040	--	--	lincRNA	Annotated_lncRNA	chr13	199815584	200004957	-	3	3258	115
ALDBSSCT0000008902	ALDBSSCG0000005441	--	--	lincRNA	Annotated_lncRNA	chr6	58482358	58486214	+	2	2032	147
ALDBSSCT0000012012	ALDBSSCG0000007318	--	--	lincRNA	Annotated_lncRNA	chrX	15451392	15481567	-	3	709	74
ALDBSSCT0000008144	ALDBSSCG0000004944	--	--	lincRNA	Annotated_lncRNA	chr4	127173123	127182366	-	3	4634	116
ALDBSSCT0000010443	ALDBSSCG0000006345	--	--	lincRNA	Annotated_lncRNA	chr8	33609152	33748574	+	3	1106	94
ALDBSSCT0000003919	ALDBSSCG0000002357	--	--	lincRNA	Annotated_lncRNA	chr14	55071955	55076649	-	2	245	81
ALDBSSCT0000003399	ALDBSSCG0000002040	--	--	lincRNA	Annotated_lncRNA	chr13	199815584	200022138	-	2	3163	114
ALDBSSCT0000008885	ALDBSSCG0000005431	--	--	lincRNA	Annotated_lncRNA	chr6	57187590	57192986	+	2	1125	120
ALDBSSCT0000008143	ALDBSSCG0000004943	--	--	lincRNA	Annotated_lncRNA	chr4	127114631	127116971	-	2	2042	160
ALDBSSCT0000008142	ALDBSSCG0000004942	--	--	lincRNA	Annotated_lncRNA	chr4	126007368	126070300	-	2	492	67
ENSSSCT00000013050	ENSSSCG00000011926	CD200R1L	-	processed_transcript	Annotated_lncRNA	chr13	156623779	156665967	+	6	1383	307
ALDBSSCT0000001685	ALDBSSCG0000001018	--	--	lincRNA	Annotated_lncRNA	chr11	8770513	8772099	+	4	308	99
ALDBSSCT0000001689	ALDBSSCG0000001020	--	--	lincRNA	Annotated_lncRNA	chr11	9776964	9937075	+	4	891	71
ALDBSSCT0000001727	ALDBSSCG0000001044	--	--	lincRNA	Annotated_lncRNA	chr11	22320033	22321646	+	2	805	147
ALDBSSCT0000010693	ALDBSSCG0000006476	--	--	lincRNA	Annotated_lncRNA	chr8	145176542	145179345	+	2	2644	121
ALDBSSCT0000007002	ALDBSSCG0000004255	--	--	lincRNA	Annotated_lncRNA	chr3	6629750	6639048	-	4	522	108
ALDBSSCT0000003464	ALDBSSCG0000002088	--	--	lincRNA	Annotated_lncRNA	chr14	9750702	9753134	+	2	962	101
ALDBSSCT0000001720	ALDBSSCG0000001038	--	--	lincRNA	Annotated_lncRNA	chr11	19523410	19534561	+	2	244	79
ALDBSSCT0000001721	ALDBSSCG0000001039	--	--	lincRNA	Annotated_lncRNA	chr11	19591308	19596470	+	4	313	69
ALDBSSCT0000002284	ALDBSSCG0000001378	--	--	lincRNA	Annotated_lncRNA	chr12	55458790	55465075	+	3	483	117
ALDBSSCT0000000553	ALDBSSCG0000000328	--	--	lincRNA	Annotated_lncRNA	chr1	303591823	303602681	+	3	580	124
ALDBSSCT0000006321	ALDBSSCG0000003864	--	--	lincRNA	Annotated_lncRNA	chr2	70615642	70617401	-	3	783	167
ALDBSSCT0000002539	ALDBSSCG0000001537	--	--	lincRNA	Annotated_lncRNA	chr12	62737412	62747740	-	4	509	83
ALDBSSCT0000009363	ALDBSSCG0000005713	--	--	lincRNA	Annotated_lncRNA	chr6	57252939	57264728	-	4	1527	181
ALDBSSCT0000000554	ALDBSSCG0000000328	--	--	lincRNA	Annotated_lncRNA	chr1	303591867	303626212	+	3	4783	222
ALDBSSCT0000003433	ALDBSSCG0000002068	--	--	lincRNA	Annotated_lncRNA	chr13	216542267	216547330	-	2	4224	250
ALDBSSCT0000002532	ALDBSSCG0000001531	--	--	lincRNA	Annotated_lncRNA	chr12	61928788	61940041	-	2	2540	146
ALDBSSCT0000000411	ALDBSSCG0000000240	--	--	lincRNA	Annotated_lncRNA	chr1	207033095	207034260	+	2	841	88
ALDBSSCT0000000559	ALDBSSCG0000000330	--	--	lincRNA	Annotated_lncRNA	chr1	303870314	303870977	+	2	558	69
ALDBSSCT0000003438	ALDBSSCG0000002071	--	--	lincRNA	Annotated_lncRNA	chr13	217179661	217180746	-	2	269	89
ALDBSSCT0000009082	ALDBSSCG0000005542	--	--	lincRNA	Annotated_lncRNA	chr6	127052381	127053707	+	2	545	119
ALDBSSCT0000009081	ALDBSSCG0000005541	--	--	lincRNA	Annotated_lncRNA	chr6	125811821	125857266	+	2	277	85
ALDBSSCT0000011968	ALDBSSCG0000007285	--	--	lincRNA	Annotated_lncRNA	chrX	114769605	114845338	+	2	337	99
ALDBSSCT0000003939	ALDBSSCG0000002372	--	--	lincRNA	Annotated_lncRNA	chr14	65766030	65775758	-	2	1414	135
ALDBSSCT0000005658	ALDBSSCG0000003433	--	--	lincRNA	Annotated_lncRNA	chr18	18770433	18776091	-	2	1961	83
ALDBSSCT0000002430	ALDBSSCG0000001471	--	--	lincRNA	Annotated_lncRNA	chr12	38344990	38356842	-	2	1182	149
ALDBSSCT0000010840	ALDBSSCG0000006566	--	--	lincRNA	Annotated_lncRNA	chr8	44382396	44454455	-	2	454	121
ALDBSSCT0000011798	ALDBSSCG0000007157	--	--	lincRNA	Annotated_lncRNA	GL892911.1	273696	274363	-	2	404	111
ALDBSSCT0000011244	ALDBSSCG0000006828	--	--	lincRNA	Annotated_lncRNA	chr9	74084568	74089028	+	2	3269	126
ALDBSSCT0000007879	ALDBSSCG0000004771	--	--	lincRNA	Annotated_lncRNA	chr4	12468887	12615670	-	3	616	118
ALDBSSCT0000011936	ALDBSSCG0000007263	--	--	lincRNA	Annotated_lncRNA	chrX	55269494	55275391	+	2	5371	338
ALDBSSCT0000005656	ALDBSSCG0000003431	--	--	lincRNA	Annotated_lncRNA	chr18	15795940	15798343	-	2	2396	135
ALDBSSCT0000010700	ALDBSSCG0000006479	--	--	lincRNA	Annotated_lncRNA	chr8	145845634	145846608	+	2	662	89
ALDBSSCT0000005655	ALDBSSCG0000003430	--	--	lincRNA	Annotated_lncRNA	chr18	15475639	15487755	-	2	689	107
ALDBSSCT0000010368	ALDBSSCG0000006297	--	--	lincRNA	Annotated_lncRNA	chr7	131294482	131299557	-	2	438	82
ALDBSSCT0000010369	ALDBSSCG0000006298	--	--	lincRNA	Annotated_lncRNA	chr7	131387859	131389321	-	2	1092	236
ALDBSSCT0000007139	ALDBSSCG0000004341	--	--	lincRNA	Annotated_lncRNA	chr3	45435559	45447826	-	2	935	98
ENSSSCT00000035761	ENSSSCG00000007280	ITCH	-	processed_transcript	Annotated_lncRNA	chr17	43036066	43053973	+	5	1556	219
ALDBSSCT0000004622	ALDBSSCG0000002811	--	--	lincRNA	Annotated_lncRNA	chr15	140146925	140148258	-	2	1327	103
ALDBSSCT0000009564	ALDBSSCG0000005834	--	--	lincRNA	Annotated_lncRNA	chr6	148737498	148743720	-	2	622	133
ALDBSSCT0000011335	ALDBSSCG0000006883	--	--	lincRNA	Annotated_lncRNA	chr9	132499524	132502190	+	2	826	98
ALDBSSCT0000005664	ALDBSSCG0000003437	--	--	lincRNA	Annotated_lncRNA	chr18	21014027	21015932	-	2	1059	201
ALDBSSCT0000007131	ALDBSSCG0000004337	--	--	lincRNA	Annotated_lncRNA	chr3	44891244	44901385	-	2	994	107
ALDBSSCT0000004629	ALDBSSCG0000002814	--	--	lincRNA	Annotated_lncRNA	chr15	142402240	142421441	-	3	504	131
ALDBSSCT0000007133	ALDBSSCG0000004337	--	--	lincRNA	Annotated_lncRNA	chr3	44891244	44910629	-	2	1011	107
ALDBSSCT0000006191	ALDBSSCG0000003785	--	--	lincRNA	Annotated_lncRNA	chr2	18181478	18195388	-	3	584	171
ALDBSSCT0000011648	ALDBSSCG0000007072	--	--	lincRNA	Annotated_lncRNA	chr9	112839685	112868672	-	2	255	85
ALDBSSCT0000001433	ALDBSSCG0000000868	--	--	lincRNA	Annotated_lncRNA	chr10	16037674	16054288	-	2	313	89
ALDBSSCT0000004150	ALDBSSCG0000002502	--	--	lincRNA	Annotated_lncRNA	chr15	22661794	22688355	+	3	1200	79
ALDBSSCT0000001431	ALDBSSCG0000000866	--	--	lincRNA	Annotated_lncRNA	chr10	15817725	15820587	-	2	333	74
ALDBSSCT0000001533	ALDBSSCG0000000934	--	--	lincRNA	Annotated_lncRNA	chr10	51926319	51927198	-	2	761	165
ALDBSSCT0000010676	ALDBSSCG0000006475	--	--	lincRNA	Annotated_lncRNA	chr8	144715853	144727029	+	5	9174	136
ALDBSSCT0000011769	ALDBSSCG0000007136	--	--	lincRNA	Annotated_lncRNA	chr9	148558387	148568281	-	4	2872	132
ALDBSSCT0000001439	ALDBSSCG0000000871	--	--	lincRNA	Annotated_lncRNA	chr10	17585732	17609846	-	3	1101	100
ALDBSSCT0000009247	ALDBSSCG0000005632	--	--	lincRNA	Annotated_lncRNA	chr6	15056160	15057194	-	2	748	87
ALDBSSCT0000001235	ALDBSSCG0000000751	--	--	lincRNA	Annotated_lncRNA	chr10	44063583	44076628	+	4	3935	108
ALDBSSCT0000004523	ALDBSSCG0000002753	--	--	lincRNA	Annotated_lncRNA	chr15	91403232	91405476	-	2	563	76
ALDBSSCT0000007275	ALDBSSCG0000004409	--	--	lincRNA	Annotated_lncRNA	chr3	100889356	100906449	-	2	1642	134
ENSSSCT00000021112	ENSSSCG00000019517	7SK	7SK RNA [Source:RFAM;Acc:RF00100]	misc_RNA	Annotated_lncRNA	GL895038.1	95518	95845	-	1	328	88
ALDBSSCT0000002758	ALDBSSCG0000001673	--	--	lincRNA	Annotated_lncRNA	chr13	109189179	109210001	+	3	873	134
ALDBSSCT0000010385	ALDBSSCG0000006307	--	--	lincRNA	Annotated_lncRNA	chr8	2959045	2962101	+	3	1042	241
ALDBSSCT0000011336	ALDBSSCG0000006884	--	--	lincRNA	Annotated_lncRNA	chr9	132505159	132507510	+	2	2335	195
ALDBSSCT0000002757	ALDBSSCG0000001672	--	--	lincRNA	Annotated_lncRNA	chr13	107046764	107049932	+	3	946	72
ALDBSSCT0000004234	ALDBSSCG0000002564	--	--	lincRNA	Annotated_lncRNA	chr15	86354756	86355820	+	2	439	73
ALDBSSCT0000004233	ALDBSSCG0000002563	--	--	lincRNA	Annotated_lncRNA	chr15	86322764	86337918	+	3	202	44
ALDBSSCT0000003825	ALDBSSCG0000002300	--	--	lincRNA	Annotated_lncRNA	chr14	22035852	22043232	-	2	884	92
ALDBSSCT0000008733	ALDBSSCG0000005327	--	--	lincRNA	Annotated_lncRNA	chr6	8557828	8578292	+	3	3596	129
ALDBSSCT0000006581	ALDBSSCG0000004018	--	--	lincRNA	Annotated_lncRNA	chr3	14025793	14250025	+	4	1826	115
ALDBSSCT0000006887	ALDBSSCG0000004197	--	--	lincRNA	Annotated_lncRNA	chr3	126980692	127039905	+	4	1946	89
ALDBSSCT0000005151	ALDBSSCG0000003106	--	--	lincRNA	Annotated_lncRNA	chr17	36275202	36282755	+	2	601	172
ALDBSSCT0000011821	ALDBSSCG0000007177	--	--	lincRNA	Annotated_lncRNA	GL893911.1	15262	23800	+	2	6184	183
ALDBSSCT0000011542	ALDBSSCG0000007007	--	--	lincRNA	Annotated_lncRNA	chr9	50679328	50680252	-	2	437	107
ALDBSSCT0000004970	ALDBSSCG0000003008	--	--	lincRNA	Annotated_lncRNA	chr16	50534275	50536912	-	2	1894	105
ALDBSSCT0000006862	ALDBSSCG0000004182	--	--	lincRNA	Annotated_lncRNA	chr3	122108731	122109367	+	2	281	74
ALDBSSCT0000009216	ALDBSSCG0000005617	--	--	lincRNA	Annotated_lncRNA	chr6	8557915	8562093	-	2	3990	194
ALDBSSCT0000004973	ALDBSSCG0000003010	--	--	lincRNA	Annotated_lncRNA	chr16	52627785	52635265	-	3	2133	144
ALDBSSCT0000007221	ALDBSSCG0000004390	--	--	lincRNA	Annotated_lncRNA	chr3	82405885	82491751	-	2	5950	143
ALDBSSCT0000007223	ALDBSSCG0000004392	--	--	lincRNA	Annotated_lncRNA	chr3	83819580	83867999	-	11	2422	139
ALDBSSCT0000003653	ALDBSSCG0000002184	--	--	lincRNA	Annotated_lncRNA	chr14	77775467	77776229	+	2	550	103
ALDBSSCT0000009581	ALDBSSCG0000005849	--	--	lincRNA	Annotated_lncRNA	chr6	154686096	154703949	-	2	2316	134
ALDBSSCT0000005714	ALDBSSCG0000003468	--	--	lincRNA	Annotated_lncRNA	chr18	43474678	43751946	-	5	1380	95
ALDBSSCT0000005490	ALDBSSCG0000003328	--	--	lincRNA	Annotated_lncRNA	chr18	25494988	25497863	+	2	2609	97
ALDBSSCT0000009328	ALDBSSCG0000005688	--	--	lincRNA	Annotated_lncRNA	chr6	47019232	47023895	-	2	4194	274
ALDBSSCT0000010069	ALDBSSCG0000006127	--	--	lincRNA	Annotated_lncRNA	chr7	17639373	17846940	-	5	689	124
ALDBSSCT0000001898	ALDBSSCG0000001148	--	--	lincRNA	Annotated_lncRNA	chr11	9634286	9635495	-	2	1104	82
ALDBSSCT0000003346	ALDBSSCG0000002013	--	--	lincRNA	Annotated_lncRNA	chr13	160470294	160477435	-	2	4139	127
ALDBSSCT0000011822	ALDBSSCG0000007178	--	--	lincRNA	Annotated_lncRNA	GL893911.1	25543	26563	+	2	833	76
ALDBSSCT0000006212	ALDBSSCG0000003792	--	--	lincRNA	Annotated_lncRNA	chr2	19364873	19376845	-	2	213	71
ALDBSSCT0000004193	ALDBSSCG0000002536	--	--	lincRNA	Annotated_lncRNA	chr15	61484116	61607945	+	2	1637	124
ALDBSSCT0000009341	ALDBSSCG0000005697	--	--	lincRNA	Annotated_lncRNA	chr6	51995849	52001371	-	2	510	147
ALDBSSCT0000001890	ALDBSSCG0000001144	--	--	lincRNA	Annotated_lncRNA	chr11	6913510	6921154	-	3	1772	163
ALDBSSCT0000009561	ALDBSSCG0000005831	--	--	lincRNA	Annotated_lncRNA	chr6	147838287	147839694	-	2	378	109
ALDBSSCT0000001893	ALDBSSCG0000001144	--	--	lincRNA	Annotated_lncRNA	chr11	6913510	6923788	-	5	2226	163
ALDBSSCT0000001894	ALDBSSCG0000001144	--	--	lincRNA	Annotated_lncRNA	chr11	6913510	6923806	-	5	1793	163
ALDBSSCT0000000319	ALDBSSCG0000000186	--	--	lincRNA	Annotated_lncRNA	chr1	155395789	155403534	+	3	809	184
ALDBSSCT0000004488	ALDBSSCG0000002734	--	--	lincRNA	Annotated_lncRNA	chr15	70682527	70689189	-	2	6530	124
ALDBSSCT0000005473	ALDBSSCG0000003318	--	--	lincRNA	Annotated_lncRNA	chr18	18854095	18972634	+	5	5004	155
ALDBSSCT0000006652	ALDBSSCG0000004069	--	--	lincRNA	Annotated_lncRNA	chr3	40497554	40500112	+	2	1227	184
ALDBSSCT0000001096	ALDBSSCG0000000680	--	--	lincRNA	Annotated_lncRNA	chr10	558060	564949	+	4	373	66
ALDBSSCT0000006650	ALDBSSCG0000004067	--	--	lincRNA	Annotated_lncRNA	chr3	40281583	40285210	+	2	1090	101
ALDBSSCT0000006130	ALDBSSCG0000003745	--	--	lincRNA	Annotated_lncRNA	chr2	3270561	3275705	-	2	3917	225
ALDBSSCT0000001157	ALDBSSCG0000000716	--	--	lincRNA	Annotated_lncRNA	chr10	22597135	22603060	+	2	5335	152
ALDBSSCT0000006348	ALDBSSCG0000003883	--	--	lincRNA	Annotated_lncRNA	chr2	84651321	84655149	-	2	3725	93
ALDBSSCT0000011334	ALDBSSCG0000006882	--	--	lincRNA	Annotated_lncRNA	chr9	132221014	132224517	+	2	962	100
ALDBSSCT0000001873	ALDBSSCG0000001134	--	--	lincRNA	Annotated_lncRNA	chr11	5163849	5173214	-	3	3523	162
ALDBSSCT0000009580	ALDBSSCG0000005849	--	--	lincRNA	Annotated_lncRNA	chr6	154686096	154703949	-	3	2389	134
ALDBSSCT0000003059	ALDBSSCG0000001834	--	--	lincRNA	Annotated_lncRNA	chr13	12834620	12843927	-	2	6131	143
ALDBSSCT0000001877	ALDBSSCG0000001136	--	--	lincRNA	Annotated_lncRNA	chr11	5621013	5622812	-	2	760	62
ALDBSSCT0000011638	ALDBSSCG0000007063	--	--	lincRNA	Annotated_lncRNA	chr9	102937494	102941886	-	4	1573	93
ALDBSSCT0000000705	ALDBSSCG0000000419	--	--	lincRNA	Annotated_lncRNA	chr1	40968874	40973200	-	2	3649	122
ALDBSSCT0000001879	ALDBSSCG0000001137	--	--	lincRNA	Annotated_lncRNA	chr11	5762208	5770778	-	2	7834	193
ENSSSCT00000034080	ENSSSCG00000004600	CH242-58J12.2	-	processed_transcript	Annotated_lncRNA	chr1	126926288	126983332	-	8	997	274
ALDBSSCT0000003057	ALDBSSCG0000001832	--	--	lincRNA	Annotated_lncRNA	chr13	12533705	12816305	-	3	299	76
ALDBSSCT0000001791	ALDBSSCG0000001082	--	--	lincRNA	Annotated_lncRNA	chr11	73458738	73461151	+	2	2401	158
ALDBSSCT0000011420	ALDBSSCG0000006944	--	--	lincRNA	Annotated_lncRNA	chr9	7464836	7479738	-	3	1147	180
ALDBSSCT0000003159	ALDBSSCG0000001902	--	--	lincRNA	Annotated_lncRNA	chr13	66363516	66375381	-	3	299	93
ALDBSSCT0000010721	ALDBSSCG0000006488	--	--	lincRNA	Annotated_lncRNA	chr8	115218	128773	-	3	533	177
ALDBSSCT0000005271	ALDBSSCG0000003181	--	--	lincRNA	Annotated_lncRNA	chr17	3627925	3647263	-	3	2792	121
ALDBSSCT0000008044	ALDBSSCG0000004882	--	--	lincRNA	Annotated_lncRNA	chr4	95670868	95689579	-	2	611	108
ALDBSSCT0000009326	ALDBSSCG0000005686	--	--	lincRNA	Annotated_lncRNA	chr6	46558080	46563107	-	2	536	165
ALDBSSCT0000006106	ALDBSSCG0000003729	--	--	lincRNA	Annotated_lncRNA	chr2	157738640	157739391	+	2	685	66
ALDBSSCT0000008900	ALDBSSCG0000005440	--	--	lincRNA	Annotated_lncRNA	chr6	58332909	58335284	+	2	1812	128
ALDBSSCT0000008591	ALDBSSCG0000005230	--	--	lincRNA	Annotated_lncRNA	chr5	65507103	65513006	-	3	2926	122
ALDBSSCT0000006060	ALDBSSCG0000003711	--	--	lincRNA	Annotated_lncRNA	chr2	147186389	147192155	+	4	1894	180
ALDBSSCT0000005273	ALDBSSCG0000003183	--	--	lincRNA	Annotated_lncRNA	chr17	5807288	5811651	-	2	1410	93
ALDBSSCT0000006068	ALDBSSCG0000003715	--	--	lincRNA	Annotated_lncRNA	chr2	147403790	147405025	+	2	1100	175
ALDBSSCT0000005086	ALDBSSCG0000003065	--	--	lincRNA	Annotated_lncRNA	chr16	82411093	82413437	-	2	266	88
ALDBSSCT0000004244	ALDBSSCG0000002571	--	--	lincRNA	Annotated_lncRNA	chr15	91445960	91446832	+	2	705	113
ALDBSSCT0000007044	ALDBSSCG0000004285	--	--	lincRNA	Annotated_lncRNA	chr3	18344308	18354283	-	3	613	125
ALDBSSCT0000003595	ALDBSSCG0000002149	--	--	lincRNA	Annotated_lncRNA	chr14	49759489	49760671	+	2	1101	122
ALDBSSCT0000010381	ALDBSSCG0000006304	--	--	lincRNA	Annotated_lncRNA	chr8	1291784	1292551	+	2	762	165
ALDBSSCT0000007041	ALDBSSCG0000004285	--	--	lincRNA	Annotated_lncRNA	chr3	18344084	18353941	-	3	241	80
ALDBSSCT0000001378	ALDBSSCG0000000848	--	--	lincRNA	Annotated_lncRNA	chr10	10583480	10737016	-	8	4255	103
ALDBSSCT0000007043	ALDBSSCG0000004285	--	--	lincRNA	Annotated_lncRNA	chr3	18344308	18354020	-	3	647	137
ALDBSSCT0000007042	ALDBSSCG0000004285	--	--	lincRNA	Annotated_lncRNA	chr3	18344084	18354275	-	3	278	92
ALDBSSCT0000000773	ALDBSSCG0000000466	--	--	lincRNA	Annotated_lncRNA	chr1	103294374	103334163	-	2	970	110
ALDBSSCT0000002835	ALDBSSCG0000001729	--	--	lincRNA	Annotated_lncRNA	chr13	147427560	147428834	+	2	344	57
ALDBSSCT0000010367	ALDBSSCG0000006296	--	--	lincRNA	Annotated_lncRNA	chr7	130866113	130867866	-	2	1086	147
ALDBSSCT0000011249	ALDBSSCG0000006831	--	--	lincRNA	Annotated_lncRNA	chr9	74914992	74920416	+	2	1567	74
ALDBSSCT0000000775	ALDBSSCG0000000468	--	--	lincRNA	Annotated_lncRNA	chr1	107258468	107269259	-	2	2502	196
ALDBSSCT0000003206	ALDBSSCG0000001928	--	--	lincRNA	Annotated_lncRNA	chr13	80729472	80739269	-	2	7102	279
ALDBSSCT0000011949	ALDBSSCG0000007271	--	--	lincRNA	Annotated_lncRNA	chrX	78275467	78279263	+	4	677	84
ALDBSSCT0000008919	ALDBSSCG0000005451	--	--	lincRNA	Annotated_lncRNA	chr6	63952115	63955469	+	2	797	78
ALDBSSCT0000007957	ALDBSSCG0000004823	--	--	lincRNA	Annotated_lncRNA	chr4	55302085	55304394	-	2	2301	98
ENSSSCT00000036410	ENSSSCG00000012774	DUSP9	-	processed_transcript	Annotated_lncRNA	chrX	141968377	141977756	+	4	2394	495
ALDBSSCT0000003201	ALDBSSCG0000001928	--	--	lincRNA	Annotated_lncRNA	chr13	80720757	80738851	-	3	4250	198
ALDBSSCT0000000170	ALDBSSCG0000000103	--	--	lincRNA	Annotated_lncRNA	chr1	83129170	83135612	+	2	4886	115
ALDBSSCT0000000171	ALDBSSCG0000000104	--	--	lincRNA	Annotated_lncRNA	chr1	84560285	84564704	+	4	471	67
ALDBSSCT0000000679	ALDBSSCG0000000409	--	--	lincRNA	Annotated_lncRNA	chr1	31515310	31522414	-	2	943	185
ALDBSSCT0000000678	ALDBSSCG0000000408	--	--	lincRNA	Annotated_lncRNA	chr1	31297848	31298556	-	2	700	64
ENSSSCT00000020430	ENSSSCG00000018835	7SK	7SK RNA [Source:RFAM;Acc:RF00100]	misc_RNA	Annotated_lncRNA	chr14	138442959	138443263	-	1	305	87
ALDBSSCT0000007114	ALDBSSCG0000004330	--	--	lincRNA	Annotated_lncRNA	chr3	40884942	40888371	-	2	969	205
ALDBSSCT0000006722	ALDBSSCG0000004101	--	--	lincRNA	Annotated_lncRNA	chr3	54960494	54961251	+	2	335	60
ALDBSSCT0000009611	ALDBSSCG0000005862	--	--	lincRNA	Annotated_lncRNA	chr7	2440658	2441802	+	2	763	150
ALDBSSCT0000010214	ALDBSSCG0000006215	--	--	lincRNA	Annotated_lncRNA	chr7	80958556	80962847	-	2	4006	206
ALDBSSCT0000005824	ALDBSSCG0000003542	--	--	lincRNA	Annotated_lncRNA	chr2	17755529	17770980	+	5	330	41
ALDBSSCT0000005826	ALDBSSCG0000003544	--	--	lincRNA	Annotated_lncRNA	chr2	18918687	18924186	+	2	3564	277
ALDBSSCT0000008210	ALDBSSCG0000004988	--	--	lincRNA	Annotated_lncRNA	chr4	142642598	142645663	-	4	519	84
ALDBSSCT0000008741	ALDBSSCG0000005334	--	--	lincRNA	Annotated_lncRNA	chr6	12314947	12322156	+	2	301	99
ALDBSSCT0000008740	ALDBSSCG0000005333	--	--	lincRNA	Annotated_lncRNA	chr6	12256448	12257831	+	2	894	97
ALDBSSCT0000005942	ALDBSSCG0000003630	--	--	lincRNA	Annotated_lncRNA	chr2	81306226	81325019	+	3	409	78
ALDBSSCT0000011677	ALDBSSCG0000007091	--	--	lincRNA	Annotated_lncRNA	chr9	129016328	129030354	-	2	494	99
ALDBSSCT0000005443	ALDBSSCG0000003296	--	--	lincRNA	Annotated_lncRNA	chr18	6671950	6676963	+	5	1275	97
ALDBSSCT0000004414	ALDBSSCG0000002688	--	--	lincRNA	Annotated_lncRNA	chr15	36230005	36234763	-	2	2436	106
ALDBSSCT0000010401	ALDBSSCG0000006317	--	--	lincRNA	Annotated_lncRNA	chr8	9512303	9514518	+	2	1057	88
ALDBSSCT0000006627	ALDBSSCG0000004053	--	--	lincRNA	Annotated_lncRNA	chr3	33491969	33493814	+	2	1759	147
ALDBSSCT0000006625	ALDBSSCG0000004053	--	--	lincRNA	Annotated_lncRNA	chr3	33491616	33493814	+	3	997	100
ALDBSSCT0000007243	ALDBSSCG0000004393	--	--	lincRNA	Annotated_lncRNA	chr3	84691366	84694560	-	2	2236	81
ALDBSSCT0000004797	ALDBSSCG0000002915	--	--	lincRNA	Annotated_lncRNA	chr16	48743344	48833673	+	4	1447	69
ALDBSSCT0000008837	ALDBSSCG0000005399	--	--	lincRNA	Annotated_lncRNA	chr6	46563183	46604364	+	3	1486	187
ALDBSSCT0000008187	ALDBSSCG0000004972	--	--	lincRNA	Annotated_lncRNA	chr4	139141100	139177399	-	3	686	118
ALDBSSCT0000006669	ALDBSSCG0000004077	--	--	lincRNA	Annotated_lncRNA	chr3	41514839	41525893	+	4	7828	256
ALDBSSCT0000008981	ALDBSSCG0000005497	--	--	lincRNA	Annotated_lncRNA	chr6	91774995	91809183	+	2	2059	151
ALDBSSCT0000008983	ALDBSSCG0000005497	--	--	lincRNA	Annotated_lncRNA	chr6	91802204	91809183	+	2	2059	151
ALDBSSCT0000006478	ALDBSSCG0000003956	--	--	lincRNA	Annotated_lncRNA	chr2	147192945	147195168	-	2	1206	119
ALDBSSCT0000000518	ALDBSSCG0000000304	--	--	lincRNA	Annotated_lncRNA	chr1	281952666	281953565	+	2	785	145
ALDBSSCT0000000519	ALDBSSCG0000000305	--	--	lincRNA	Annotated_lncRNA	chr1	283142090	283144241	+	2	1451	121
ALDBSSCT0000002670	ALDBSSCG0000001620	--	--	lincRNA	Annotated_lncRNA	chr13	72547827	72556462	+	4	401	68
ALDBSSCT0000008507	ALDBSSCG0000005173	--	--	lincRNA	Annotated_lncRNA	chr5	11962122	11963744	-	2	1451	115
ALDBSSCT0000003279	ALDBSSCG0000001977	--	--	lincRNA	Annotated_lncRNA	chr13	134107918	134138963	-	2	1189	184
ALDBSSCT0000008822	ALDBSSCG0000005388	--	--	lincRNA	Annotated_lncRNA	chr6	42424227	42509981	+	2	1253	201
ENSSSCT00000034347	ENSSSCG00000030894	CH242-168N3.3	-	antisense	Annotated_lncRNA	chrX	12893483	12895094	+	2	717	74
ALDBSSCT0000008820	ALDBSSCG0000005387	--	--	lincRNA	Annotated_lncRNA	chr6	41805551	41828609	+	4	1716	170
ALDBSSCT0000008821	ALDBSSCG0000005388	--	--	lincRNA	Annotated_lncRNA	chr6	42424227	42509981	+	3	1581	271
ALDBSSCT0000009989	ALDBSSCG0000006075	--	--	lincRNA	Annotated_lncRNA	chr7	130297892	130301742	+	2	435	82
ALDBSSCT0000000900	ALDBSSCG0000000546	--	--	lincRNA	Annotated_lncRNA	chr1	187481152	187482550	-	2	1161	184
ALDBSSCT0000012045	ALDBSSCG0000007343	--	--	lincRNA	Annotated_lncRNA	chrX	73952000	73952797	-	2	430	37
ALDBSSCT0000003473	ALDBSSCG0000002094	--	--	lincRNA	Annotated_lncRNA	chr14	15781824	15796541	+	5	2562	135
ALDBSSCT0000000453	ALDBSSCG0000000271	--	--	lincRNA	Annotated_lncRNA	chr1	245207022	245237825	+	3	4598	125
ALDBSSCT0000008833	ALDBSSCG0000005395	--	--	lincRNA	Annotated_lncRNA	chr6	44781588	44782741	+	2	1034	157
ALDBSSCT0000000907	ALDBSSCG0000000553	--	--	lincRNA	Annotated_lncRNA	chr1	200181448	200184643	-	3	710	104
ALDBSSCT0000006667	ALDBSSCG0000004076	--	--	lincRNA	Annotated_lncRNA	chr3	41484115	41494049	+	2	920	141
ALDBSSCT0000012051	ALDBSSCG0000007347	--	--	lincRNA	Annotated_lncRNA	chrX	85330474	85562006	-	2	606	96
ALDBSSCT0000011146	ALDBSSCG0000006761	--	--	lincRNA	Annotated_lncRNA	chr9	38416587	38417220	+	2	446	98
ALDBSSCT0000002578	ALDBSSCG0000001564	--	--	lincRNA	Annotated_lncRNA	chr13	16715925	16718331	+	3	847	124
ALDBSSCT0000011425	ALDBSSCG0000006949	--	--	lincRNA	Annotated_lncRNA	chr9	8044110	8062420	-	2	235	78
ALDBSSCT0000004463	ALDBSSCG0000002720	--	--	lincRNA	Annotated_lncRNA	chr15	61933261	61946104	-	2	6192	214
ALDBSSCT0000010124	ALDBSSCG0000006166	--	--	lincRNA	Annotated_lncRNA	chr7	36501373	36517529	-	2	5743	148
ALDBSSCT0000002276	ALDBSSCG0000001377	--	--	lincRNA	Annotated_lncRNA	chr12	54055444	54065499	+	2	1097	174
ALDBSSCT0000008132	ALDBSSCG0000004935	--	--	lincRNA	Annotated_lncRNA	chr4	121137841	121145827	-	2	7137	95
ALDBSSCT0000004465	ALDBSSCG0000002721	--	--	lincRNA	Annotated_lncRNA	chr15	62238821	62245865	-	2	2896	99
ALDBSSCT0000006662	ALDBSSCG0000004073	--	--	lincRNA	Annotated_lncRNA	chr3	40681037	40683071	+	2	1004	191
ALDBSSCT0000000990	ALDBSSCG0000000606	--	--	lincRNA	Annotated_lncRNA	chr1	256197158	256198757	-	2	837	109
ALDBSSCT0000000991	ALDBSSCG0000000607	--	--	lincRNA	Annotated_lncRNA	chr1	256312508	256313537	-	2	844	87
ENSSSCT00000033960	ENSSSCG00000016341	TRAF3IP1	-	processed_transcript	Annotated_lncRNA	chr15	152431432	152441806	-	7	1014	338
ALDBSSCT0000011428	ALDBSSCG0000006950	--	--	lincRNA	Annotated_lncRNA	chr9	8096732	8099417	-	2	1820	123
ALDBSSCT0000002848	ALDBSSCG0000001735	--	--	lincRNA	Annotated_lncRNA	chr13	154340606	154715736	+	4	578	76
ALDBSSCT0000002849	ALDBSSCG0000001735	--	--	lincRNA	Annotated_lncRNA	chr13	154340612	154766358	+	5	586	65
ALDBSSCT0000011137	ALDBSSCG0000006756	--	--	lincRNA	Annotated_lncRNA	chr9	32511723	32564373	+	3	2923	125
ALDBSSCT0000010920	ALDBSSCG0000006622	--	--	lincRNA	Annotated_lncRNA	chr8	93076195	93090916	-	2	1428	102
ALDBSSCT0000001478	ALDBSSCG0000000894	--	--	lincRNA	Annotated_lncRNA	chr10	31420928	31421786	-	3	366	122
ALDBSSCT0000011380	ALDBSSCG0000006916	--	--	lincRNA	Annotated_lncRNA	chr9	148528217	148534575	+	2	5313	191
ALDBSSCT0000001476	ALDBSSCG0000000892	--	--	lincRNA	Annotated_lncRNA	chr10	30841605	30845210	-	3	565	95
ALDBSSCT0000004117	ALDBSSCG0000002479	--	--	lincRNA	Annotated_lncRNA	chr14	151129749	151166395	-	2	971	141
ALDBSSCT0000002840	ALDBSSCG0000001733	--	--	lincRNA	Annotated_lncRNA	chr13	153220108	153222877	+	3	380	99
ALDBSSCT0000003424	ALDBSSCG0000002062	--	--	lincRNA	Annotated_lncRNA	chr13	213109035	213109780	-	4	262	87
ALDBSSCT0000011461	ALDBSSCG0000006973	--	--	lincRNA	Annotated_lncRNA	chr9	21365371	21379256	-	3	404	73
ALDBSSCT0000011877	ALDBSSCG0000007223	--	--	lincRNA	Annotated_lncRNA	JH118887.1	32374	33103	+	2	667	92
ALDBSSCT0000000420	ALDBSSCG0000000248	--	--	lincRNA	Annotated_lncRNA	chr1	212183975	212186249	+	3	1202	84
ALDBSSCT0000009355	ALDBSSCG0000005708	--	--	lincRNA	Annotated_lncRNA	chr6	56227120	56231887	-	2	594	177
ALDBSSCT0000012036	ALDBSSCG0000007337	--	--	lincRNA	Annotated_lncRNA	chrX	67151784	67178895	-	8	15208	127
ALDBSSCT0000010839	ALDBSSCG0000006565	--	--	lincRNA	Annotated_lncRNA	chr8	44227819	44228904	-	3	596	127
ALDBSSCT0000007436	ALDBSSCG0000004509	--	--	lincRNA	Annotated_lncRNA	chr4	10385444	10423543	+	2	1872	205
ALDBSSCT0000012035	ALDBSSCG0000007337	--	--	lincRNA	Annotated_lncRNA	chrX	67151784	67178877	-	8	14340	127
ALDBSSCT0000007823	ALDBSSCG0000004738	--	--	lincRNA	Annotated_lncRNA	chr4	1319218	1324513	-	2	1116	142
ALDBSSCT0000007822	ALDBSSCG0000004737	--	--	lincRNA	Annotated_lncRNA	chr4	1310864	1311340	-	2	362	120
ALDBSSCT0000000293	ALDBSSCG0000000168	--	--	lincRNA	Annotated_lncRNA	chr1	142577396	142578248	+	2	306	101
ALDBSSCT0000011209	ALDBSSCG0000006806	--	--	lincRNA	Annotated_lncRNA	chr9	62457894	62465608	+	5	6179	138
ALDBSSCT0000000295	ALDBSSCG0000000169	--	--	lincRNA	Annotated_lncRNA	chr1	142835400	142837817	+	2	1778	91
ALDBSSCT0000002407	ALDBSSCG0000001457	--	--	lincRNA	Annotated_lncRNA	chr12	24007745	24010073	-	2	810	68
ALDBSSCT0000002404	ALDBSSCG0000001455	--	--	lincRNA	Annotated_lncRNA	chr12	23213604	23219751	-	3	1842	141
ALDBSSCT0000007824	ALDBSSCG0000004739	--	--	lincRNA	Annotated_lncRNA	chr4	1324676	1325698	-	2	907	130
ALDBSSCT0000003333	ALDBSSCG0000002005	--	--	lincRNA	Annotated_lncRNA	chr13	154253421	154340135	-	4	733	89
ALDBSSCT0000011118	ALDBSSCG0000006750	--	--	lincRNA	Annotated_lncRNA	chr9	30728057	30732233	+	4	2041	131
ALDBSSCT0000006840	ALDBSSCG0000004170	--	--	lincRNA	Annotated_lncRNA	chr3	117297923	117302330	+	3	2961	119
ALDBSSCT0000010059	ALDBSSCG0000006120	--	--	lincRNA	Annotated_lncRNA	chr7	13056635	13321227	-	6	932	119
ALDBSSCT0000005722	ALDBSSCG0000003473	--	--	lincRNA	Annotated_lncRNA	chr18	47381685	47386100	-	2	2539	137
ALDBSSCT0000005051	ALDBSSCG0000003047	--	--	lincRNA	Annotated_lncRNA	chr16	74604894	74609511	-	3	3031	126
ALDBSSCT0000011298	ALDBSSCG0000006861	--	--	lincRNA	Annotated_lncRNA	chr9	115582814	115602155	+	2	390	127
ALDBSSCT0000007144	ALDBSSCG0000004345	--	--	lincRNA	Annotated_lncRNA	chr3	47943074	47952235	-	2	2896	147
ALDBSSCT0000009681	ALDBSSCG0000005907	--	--	lincRNA	Annotated_lncRNA	chr7	23062785	23070260	+	3	2654	126
ALDBSSCT0000007147	ALDBSSCG0000004347	--	--	lincRNA	Annotated_lncRNA	chr3	48147723	48150246	-	2	1193	246
ALDBSSCT0000007140	ALDBSSCG0000004342	--	--	lincRNA	Annotated_lncRNA	chr3	45737517	45739104	-	2	1553	86
ALDBSSCT0000011871	ALDBSSCG0000007217	--	--	lincRNA	Annotated_lncRNA	JH118724.1	72322	74342	+	2	1588	84
ENSSSCT00000036173	ENSSSCG00000030934	CH242-156O11.3	-	lincRNA	Annotated_lncRNA	chrX	6807000	6811375	+	2	696	177
ALDBSSCT0000010316	ALDBSSCG0000006274	--	--	lincRNA	Annotated_lncRNA	chr7	122222654	122224641	-	2	837	108
ALDBSSCT0000011201	ALDBSSCG0000006801	--	--	lincRNA	Annotated_lncRNA	chr9	59043535	59050625	+	2	439	62
ALDBSSCT0000011969	ALDBSSCG0000007286	--	--	lincRNA	Annotated_lncRNA	chrX	116163442	116164178	+	2	505	168
ALDBSSCT0000006496	ALDBSSCG0000003968	--	--	lincRNA	Annotated_lncRNA	chr2	150429736	150435039	-	2	450	139
ALDBSSCT0000005751	ALDBSSCG0000003489	--	--	lincRNA	Annotated_lncRNA	chr18	55144069	55145935	-	2	1411	123
ALDBSSCT0000011207	ALDBSSCG0000006805	--	--	lincRNA	Annotated_lncRNA	chr9	61707516	61709121	+	2	411	88
ALDBSSCT0000000192	ALDBSSCG0000000108	--	--	lincRNA	Annotated_lncRNA	chr1	86970483	86974649	+	2	2482	89
ALDBSSCT0000003875	ALDBSSCG0000002329	--	--	lincRNA	Annotated_lncRNA	chr14	43838212	43842012	-	3	947	177
ALDBSSCT0000006318	ALDBSSCG0000003863	--	--	lincRNA	Annotated_lncRNA	chr2	70560563	70580110	-	2	243	69
ALDBSSCT0000004776	ALDBSSCG0000002906	--	--	lincRNA	Annotated_lncRNA	chr16	42882923	42910819	+	4	1881	164
ALDBSSCT0000004024	ALDBSSCG0000002425	--	--	lincRNA	Annotated_lncRNA	chr14	110488911	110494551	-	2	429	86
ALDBSSCT0000003873	ALDBSSCG0000002328	--	--	lincRNA	Annotated_lncRNA	chr14	43461327	43469028	-	2	2485	138
ALDBSSCT0000011845	ALDBSSCG0000007194	--	--	lincRNA	Annotated_lncRNA	GL895994.1	42341	45385	+	2	2946	110
ALDBSSCT0000000051	ALDBSSCG0000000031	--	--	lincRNA	Annotated_lncRNA	chr1	15990126	15998337	+	2	839	116
ALDBSSCT0000009443	ALDBSSCG0000005759	--	--	lincRNA	Annotated_lncRNA	chr6	82461972	82500396	-	2	1061	69
ALDBSSCT0000000055	ALDBSSCG0000000035	--	--	lincRNA	Annotated_lncRNA	chr1	18470168	18473816	+	2	1966	86
ALDBSSCT0000000054	ALDBSSCG0000000034	--	--	lincRNA	Annotated_lncRNA	chr1	17166636	17169140	+	2	548	89
ENSSSCT00000035247	ENSSSCG00000030761	SHROOM4	-	processed_transcript	Annotated_lncRNA	chrX	49369699	49474772	-	2	879	168
ALDBSSCT0000004203	ALDBSSCG0000002541	--	--	lincRNA	Annotated_lncRNA	chr15	66209228	66219892	+	3	1927	143
ALDBSSCT0000010906	ALDBSSCG0000006608	--	--	lincRNA	Annotated_lncRNA	chr8	80996717	81083144	-	2	391	113
ALDBSSCT0000005439	ALDBSSCG0000003294	--	--	lincRNA	Annotated_lncRNA	chr18	6240373	6244654	+	3	803	78
ENSSSCT00000019996	ENSSSCG00000018401	7SK	7SK RNA [Source:RFAM;Acc:RF00100]	misc_RNA	Annotated_lncRNA	chr9	108187102	108187423	+	1	322	70
ALDBSSCT0000001056	ALDBSSCG0000000651	--	--	lincRNA	Annotated_lncRNA	chr1	293507083	293508684	-	2	1068	120
ALDBSSCT0000004564	ALDBSSCG0000002774	--	--	lincRNA	Annotated_lncRNA	chr15	107625510	107631674	-	2	367	70
ALDBSSCT0000009339	ALDBSSCG0000005695	--	--	lincRNA	Annotated_lncRNA	chr6	51850155	51855310	-	2	2886	191
ENSSSCT00000035651	ENSSSCG00000030817	NRK	-	processed_transcript	Annotated_lncRNA	chrX	100896653	100965138	+	7	931	301
ALDBSSCT0000011184	ALDBSSCG0000006791	--	--	lincRNA	Annotated_lncRNA	chr9	53331055	53334019	+	2	782	91
ALDBSSCT0000006693	ALDBSSCG0000004086	--	--	lincRNA	Annotated_lncRNA	chr3	46620906	46786498	+	6	8411	151
ALDBSSCT0000004075	ALDBSSCG0000002465	--	--	lincRNA	Annotated_lncRNA	chr14	145078716	145089537	-	2	1609	140
ALDBSSCT0000011513	ALDBSSCG0000007001	--	--	lincRNA	Annotated_lncRNA	chr9	46439791	46454336	-	4	2548	111
ALDBSSCT0000001112	ALDBSSCG0000000691	--	--	lincRNA	Annotated_lncRNA	chr10	10132511	10137175	+	2	1672	124
ENSSSCT00000036055	ENSSSCG00000007280	ITCH	-	processed_transcript	Annotated_lncRNA	chr17	43030475	43114390	+	22	2791	687
ALDBSSCT0000009680	ALDBSSCG0000005906	--	--	lincRNA	Annotated_lncRNA	chr7	22289224	22289674	+	2	437	65
ALDBSSCT0000008243	ALDBSSCG0000005004	--	--	lincRNA	Annotated_lncRNA	chr5	3509497	3518073	+	2	3218	155
ALDBSSCT0000004800	ALDBSSCG0000002918	--	--	lincRNA	Annotated_lncRNA	chr16	52742118	52746929	+	4	1271	108
ALDBSSCT0000004802	ALDBSSCG0000002919	--	--	lincRNA	Annotated_lncRNA	chr16	52931554	52933117	+	2	269	63
ALDBSSCT0000006381	ALDBSSCG0000003905	--	--	lincRNA	Annotated_lncRNA	chr2	103686258	103826765	-	4	1594	164
ALDBSSCT0000009835	ALDBSSCG0000005990	--	--	lincRNA	Annotated_lncRNA	chr7	79440555	79467978	+	2	574	134
ALDBSSCT0000007313	ALDBSSCG0000004439	--	--	lincRNA	Annotated_lncRNA	chr3	117931808	117932821	-	2	493	81
ENSSSCT00000021485	ENSSSCG00000019890	7SK	7SK RNA [Source:RFAM;Acc:RF00100]	misc_RNA	Annotated_lncRNA	chr6	86702443	86702771	-	1	329	95
ALDBSSCT0000007315	ALDBSSCG0000004440	--	--	lincRNA	Annotated_lncRNA	chr3	117966218	117969209	-	2	1951	234
ALDBSSCT0000007314	ALDBSSCG0000004440	--	--	lincRNA	Annotated_lncRNA	chr3	117966218	117969209	-	2	1947	234
ENSSSCT00000034731	ENSSSCG00000030806	CH242-445E7.1	-	processed_transcript	Annotated_lncRNA	chrX	114048060	114051191	+	3	411	136
ALDBSSCT0000006229	ALDBSSCG0000003805	--	--	lincRNA	Annotated_lncRNA	chr2	27627666	27631051	-	2	2489	180
ALDBSSCT0000009432	ALDBSSCG0000005754	--	--	lincRNA	Annotated_lncRNA	chr6	78193363	78195251	-	2	834	214
ALDBSSCT0000008645	ALDBSSCG0000005265	--	--	lincRNA	Annotated_lncRNA	chr5	86744986	86788501	-	2	417	115
ALDBSSCT0000011008	ALDBSSCG0000006678	--	--	lincRNA	Annotated_lncRNA	chr8	141702906	141729031	-	3	1044	110
ALDBSSCT0000009023	ALDBSSCG0000005513	--	--	lincRNA	Annotated_lncRNA	chr6	99656402	99656949	+	2	382	75
ALDBSSCT0000008648	ALDBSSCG0000005267	--	--	lincRNA	Annotated_lncRNA	chr5	87492606	87493505	-	2	642	124
ALDBSSCT0000002490	ALDBSSCG0000001507	--	--	lincRNA	Annotated_lncRNA	chr12	54522700	54532860	-	3	6719	148
ALDBSSCT0000005145	ALDBSSCG0000003100	--	--	lincRNA	Annotated_lncRNA	chr17	31315685	31364884	+	2	281	93
ALDBSSCT0000002495	ALDBSSCG0000001508	--	--	lincRNA	Annotated_lncRNA	chr12	54621121	54632054	-	3	995	148
ALDBSSCT0000002494	ALDBSSCG0000001507	--	--	lincRNA	Annotated_lncRNA	chr12	54527518	54534746	-	3	3050	237
ALDBSSCT0000006140	ALDBSSCG0000003752	--	--	lincRNA	Annotated_lncRNA	chr2	3956092	3964460	-	2	5031	221
ALDBSSCT0000002631	ALDBSSCG0000001602	--	--	lincRNA	Annotated_lncRNA	chr13	45609442	45630811	+	2	518	85
ALDBSSCT0000009538	ALDBSSCG0000005812	--	--	lincRNA	Annotated_lncRNA	chr6	134630541	134663022	-	3	323	98
ALDBSSCT0000007308	ALDBSSCG0000004435	--	--	lincRNA	Annotated_lncRNA	chr3	117294000	117298170	-	2	3957	336
ENSSSCT00000035795	ENSSSCG00000001396	SLA-8	-	processed_transcript	Annotated_lncRNA	chr7	27210080	27210819	-	2	559	138
ALDBSSCT0000003880	ALDBSSCG0000002332	--	--	lincRNA	Annotated_lncRNA	chr14	45179666	45232941	-	2	624	163
ALDBSSCT0000005542	ALDBSSCG0000003356	--	--	lincRNA	Annotated_lncRNA	chr18	47459105	47460818	+	2	927	151
ALDBSSCT0000007729	ALDBSSCG0000004694	--	--	lincRNA	Annotated_lncRNA	chr4	135582252	135584928	+	2	2641	143
ALDBSSCT0000009918	ALDBSSCG0000006038	--	--	lincRNA	Annotated_lncRNA	chr7	110020362	110023091	+	2	267	56
ALDBSSCT0000004775	ALDBSSCG0000002906	--	--	lincRNA	Annotated_lncRNA	chr16	42882798	42946220	+	6	1508	156
ALDBSSCT0000003089	ALDBSSCG0000001856	--	--	lincRNA	Annotated_lncRNA	chr13	29409657	29478620	-	2	559	114
ALDBSSCT0000007646	ALDBSSCG0000004639	--	--	lincRNA	Annotated_lncRNA	chr4	102510310	102511012	+	2	521	95
ALDBSSCT0000010889	ALDBSSCG0000006596	--	--	lincRNA	Annotated_lncRNA	chr8	73918297	73931134	-	2	467	99
ALDBSSCT0000009887	ALDBSSCG0000006012	--	--	lincRNA	Annotated_lncRNA	chr7	98267227	98270732	+	2	1429	154
ALDBSSCT0000003080	ALDBSSCG0000001850	--	--	lincRNA	Annotated_lncRNA	chr13	27043724	27046723	-	2	645	166
ALDBSSCT0000006256	ALDBSSCG0000003822	--	--	lincRNA	Annotated_lncRNA	chr2	41146564	41318273	-	2	236	78
ALDBSSCT0000003659	ALDBSSCG0000002190	--	--	lincRNA	Annotated_lncRNA	chr14	84055122	84061378	+	2	550	152
ALDBSSCT0000003551	ALDBSSCG0000002127	--	--	lincRNA	Annotated_lncRNA	chr14	38084382	38144099	+	2	438	88
ALDBSSCT0000003557	ALDBSSCG0000002131	--	--	lincRNA	Annotated_lncRNA	chr14	41228695	41229448	+	2	368	101
ALDBSSCT0000001947	ALDBSSCG0000001173	--	--	lincRNA	Annotated_lncRNA	chr11	18740623	18860403	-	3	1110	210
ALDBSSCT0000001944	ALDBSSCG0000001172	--	--	lincRNA	Annotated_lncRNA	chr11	18603509	18612838	-	3	2277	161
ALDBSSCT0000000638	ALDBSSCG0000000384	--	--	lincRNA	Annotated_lncRNA	chr1	10261474	10309143	-	3	1106	141
ALDBSSCT0000011933	ALDBSSCG0000007262	--	--	lincRNA	Annotated_lncRNA	chrX	54995223	55010311	+	2	776	96
ALDBSSCT0000011989	ALDBSSCG0000007298	--	--	lincRNA	Annotated_lncRNA	chrX	139739133	139740168	+	2	334	110
ALDBSSCT0000003121	ALDBSSCG0000001873	--	--	lincRNA	Annotated_lncRNA	chr13	43546067	43546609	-	2	341	113
ALDBSSCT0000003655	ALDBSSCG0000002186	--	--	lincRNA	Annotated_lncRNA	chr14	80158050	80168486	+	2	10299	199
ALDBSSCT0000011370	ALDBSSCG0000006908	--	--	lincRNA	Annotated_lncRNA	chr9	143964058	143970784	+	2	6232	319
ALDBSSCT0000006039	ALDBSSCG0000003695	--	--	lincRNA	Annotated_lncRNA	chr2	138953588	138957771	+	2	406	87
ALDBSSCT0000010172	ALDBSSCG0000006195	--	--	lincRNA	Annotated_lncRNA	chr7	60624571	60647062	-	2	1262	194
ENSSSCT00000027578	ENSSSCG00000026924	KIFC2	-	processed_transcript	Annotated_lncRNA	chr4	415603	422886	-	18	3047	777
ALDBSSCT0000001283	ALDBSSCG0000000779	--	--	lincRNA	Annotated_lncRNA	chr10	56023529	56024570	+	2	765	117
ENSSSCT00000001522	ENSSSCG00000001396	SLA-8	-	processed_transcript	Annotated_lncRNA	chr7	27626992	27630394	-	8	1305	370
ALDBSSCT0000011378	ALDBSSCG0000006915	--	--	lincRNA	Annotated_lncRNA	chr9	148392055	148395168	+	2	2126	226
ALDBSSCT0000009487	ALDBSSCG0000005786	--	--	lincRNA	Annotated_lncRNA	chr6	100800215	100815026	-	2	2850	171
ALDBSSCT0000009654	ALDBSSCG0000005891	--	--	lincRNA	Annotated_lncRNA	chr7	13825878	13848657	+	2	1741	180
ALDBSSCT0000006030	ALDBSSCG0000003690	--	--	lincRNA	Annotated_lncRNA	chr2	135856117	135857177	+	2	924	95
ALDBSSCT0000004291	ALDBSSCG0000002600	--	--	lincRNA	Annotated_lncRNA	chr15	117963936	117965758	+	3	718	97
ALDBSSCT0000005860	ALDBSSCG0000003564	--	--	lincRNA	Annotated_lncRNA	chr2	31320585	31323238	+	3	1569	162
ALDBSSCT0000009954	ALDBSSCG0000006058	--	--	lincRNA	Annotated_lncRNA	chr7	124299187	124352196	+	3	3120	232
ALDBSSCT0000006740	ALDBSSCG0000004114	--	--	lincRNA	Annotated_lncRNA	chr3	59995062	60010272	+	4	2781	127
ALDBSSCT0000004479	ALDBSSCG0000002730	--	--	lincRNA	Annotated_lncRNA	chr15	66239842	66244077	-	2	822	130
ALDBSSCT0000008703	ALDBSSCG0000005310	--	--	lincRNA	Annotated_lncRNA	chr6	1761731	1765861	+	4	2614	308
ALDBSSCT0000003339	ALDBSSCG0000002009	--	--	lincRNA	Annotated_lncRNA	chr13	157173775	157175427	-	2	1348	83
ALDBSSCT0000006747	ALDBSSCG0000004121	--	--	lincRNA	Annotated_lncRNA	chr3	71143025	71151623	+	2	538	99
ALDBSSCT0000002836	ALDBSSCG0000001730	--	--	lincRNA	Annotated_lncRNA	chr13	150023878	150025327	+	2	392	116
ALDBSSCT0000004513	ALDBSSCG0000002744	--	--	lincRNA	Annotated_lncRNA	chr15	80006705	80052306	-	2	599	76
ALDBSSCT0000009356	ALDBSSCG0000005709	--	--	lincRNA	Annotated_lncRNA	chr6	56637216	56644029	-	2	3095	175
ALDBSSCT0000003338	ALDBSSCG0000002008	--	--	lincRNA	Annotated_lncRNA	chr13	156324155	156328974	-	2	867	75
ALDBSSCT0000004516	ALDBSSCG0000002747	--	--	lincRNA	Annotated_lncRNA	chr15	84786646	84787181	-	2	228	76
ENSSSCT00000033794	ENSSSCG00000003617	TXLNA	-	processed_transcript	Annotated_lncRNA	chr6	82743317	82746046	+	3	1367	280
ALDBSSCT0000005984	ALDBSSCG0000003655	--	--	lincRNA	Annotated_lncRNA	chr2	112804220	112818666	+	3	298	88
ALDBSSCT0000006661	ALDBSSCG0000004073	--	--	lincRNA	Annotated_lncRNA	chr3	40681007	40683071	+	3	1151	154
ALDBSSCT0000011643	ALDBSSCG0000007068	--	--	lincRNA	Annotated_lncRNA	chr9	110036525	110039045	-	2	2463	74
ALDBSSCT0000002807	ALDBSSCG0000001707	--	--	lincRNA	Annotated_lncRNA	chr13	131001727	131004200	+	2	686	113
ALDBSSCT0000001306	ALDBSSCG0000000795	--	--	lincRNA	Annotated_lncRNA	chr10	64803740	64804926	+	2	1088	96
ENSSSCT00000035899	ENSSSCG00000004600	CH242-58J12.2	-	processed_transcript	Annotated_lncRNA	chr1	126926288	126983240	-	9	977	298
ALDBSSCT0000009227	ALDBSSCG0000005622	--	--	lincRNA	Annotated_lncRNA	chr6	10689340	10715443	-	4	333	81
ALDBSSCT0000003729	ALDBSSCG0000002231	--	--	lincRNA	Annotated_lncRNA	chr14	117227502	117243637	+	2	387	70
ALDBSSCT0000001302	ALDBSSCG0000000792	--	--	lincRNA	Annotated_lncRNA	chr10	63560197	63563522	+	2	534	166
ALDBSSCT0000000643	ALDBSSCG0000000385	--	--	lincRNA	Annotated_lncRNA	chr1	10818920	10856060	-	2	688	104
ALDBSSCT0000006528	ALDBSSCG0000003991	--	--	lincRNA	Annotated_lncRNA	chr3	4187348	4200527	+	3	1308	214
ENSSSCT00000018610	ENSSSCG00000017092	GPX3	-	processed_transcript	Annotated_lncRNA	chr16	78282294	78290916	+	5	1582	174
ALDBSSCT0000003723	ALDBSSCG0000002226	--	--	lincRNA	Annotated_lncRNA	chr14	113384170	113403926	+	2	365	121
ALDBSSCT0000003337	ALDBSSCG0000002007	--	--	lincRNA	Annotated_lncRNA	chr13	156263537	156267624	-	2	482	160
ALDBSSCT0000008955	ALDBSSCG0000005482	--	--	lincRNA	Annotated_lncRNA	chr6	81651843	81660219	+	3	4867	192
ALDBSSCT0000000127	ALDBSSCG0000000079	--	--	lincRNA	Annotated_lncRNA	chr1	56854870	56870820	+	3	408	102
ALDBSSCT0000002209	ALDBSSCG0000001322	--	--	lincRNA	Annotated_lncRNA	chr12	19324176	19324766	+	2	544	165
ALDBSSCT0000006555	ALDBSSCG0000004003	--	--	lincRNA	Annotated_lncRNA	chr3	9548957	9550150	+	2	378	123
ALDBSSCT0000002204	ALDBSSCG0000001320	--	--	lincRNA	Annotated_lncRNA	chr12	19279324	19289362	+	4	2240	111
ALDBSSCT0000000081	ALDBSSCG0000000047	--	--	lincRNA	Annotated_lncRNA	chr1	24696993	24792176	+	2	915	244
ALDBSSCT0000002830	ALDBSSCG0000001724	--	--	lincRNA	Annotated_lncRNA	chr13	143232213	143236928	+	2	331	59
ALDBSSCT0000010174	ALDBSSCG0000006197	--	--	lincRNA	Annotated_lncRNA	chr7	61955263	61956016	-	2	747	84
ALDBSSCT0000002202	ALDBSSCG0000001318	--	--	lincRNA	Annotated_lncRNA	chr12	18771278	18788220	+	2	249	83
ALDBSSCT0000002203	ALDBSSCG0000001319	--	--	lincRNA	Annotated_lncRNA	chr12	19118854	19122759	+	2	2932	102
ALDBSSCT0000002338	ALDBSSCG0000001414	--	--	lincRNA	Annotated_lncRNA	chr12	3681008	3734880	-	3	745	141
ALDBSSCT0000004580	ALDBSSCG0000002784	--	--	lincRNA	Annotated_lncRNA	chr15	117344949	117350079	-	2	428	62
ALDBSSCT0000009226	ALDBSSCG0000005621	--	--	lincRNA	Annotated_lncRNA	chr6	10648038	10668132	-	4	4960	208
ALDBSSCT0000000696	ALDBSSCG0000000415	--	--	lincRNA	Annotated_lncRNA	chr1	35612777	35613444	-	2	560	75
ALDBSSCT0000004428	ALDBSSCG0000002697	--	--	lincRNA	Annotated_lncRNA	chr15	44734202	44739794	-	3	2168	88
ALDBSSCT0000001482	ALDBSSCG0000000898	--	--	lincRNA	Annotated_lncRNA	chr10	32946840	33037285	-	5	483	104
ALDBSSCT0000002330	ALDBSSCG0000001408	--	--	lincRNA	Annotated_lncRNA	chr12	1425943	1427525	-	2	1375	166
ALDBSSCT0000011890	ALDBSSCG0000007231	--	--	lincRNA	Annotated_lncRNA	JH118996.1	109324	115278	+	4	2626	137
ALDBSSCT0000004425	ALDBSSCG0000002696	--	--	lincRNA	Annotated_lncRNA	chr15	43295960	43299540	-	3	651	114
ALDBSSCT0000008677	ALDBSSCG0000005290	--	--	lincRNA	Annotated_lncRNA	chr5	98117641	98120054	-	2	502	67
ALDBSSCT0000011138	ALDBSSCG0000006756	--	--	lincRNA	Annotated_lncRNA	chr9	32511839	32566579	+	3	602	85
ENSSSCT00000034014	ENSSSCG00000008841	PDGFRA	-	processed_transcript	Annotated_lncRNA	chr8	43018349	43046213	+	18	2859	683
ENSSSCT00000030586	ENSSSCG00000028766	Metazoa_SRP	Metazoan signal recognition particle RNA [Source:RFAM;Acc:RF00017]	misc_RNA	Annotated_lncRNA	chr3	106666010	106666294	+	1	285	94
ALDBSSCT0000007038	ALDBSSCG0000004284	--	--	lincRNA	Annotated_lncRNA	chr3	18229078	18234270	-	3	1046	132
ALDBSSCT0000007039	ALDBSSCG0000004284	--	--	lincRNA	Annotated_lncRNA	chr3	18229078	18234337	-	3	1118	112
ALDBSSCT0000011852	ALDBSSCG0000007201	--	--	lincRNA	Annotated_lncRNA	GL896302.1	108889	110179	-	3	807	192
ALDBSSCT0000002963	ALDBSSCG0000001783	--	--	lincRNA	Annotated_lncRNA	chr13	200136373	200140268	+	2	3100	126
ALDBSSCT0000001736	ALDBSSCG0000001051	--	--	lincRNA	Annotated_lncRNA	chr11	26321259	26323426	+	3	753	122
ALDBSSCT0000002964	ALDBSSCG0000001783	--	--	lincRNA	Annotated_lncRNA	chr13	200136375	200140268	+	3	968	108
ALDBSSCT0000000541	ALDBSSCG0000000322	--	--	lincRNA	Annotated_lncRNA	chr1	301365113	301378017	+	2	1902	98
ALDBSSCT0000008870	ALDBSSCG0000005420	--	--	lincRNA	Annotated_lncRNA	chr6	52055851	52063194	+	2	372	101
ALDBSSCT0000000543	ALDBSSCG0000000324	--	--	lincRNA	Annotated_lncRNA	chr1	302437521	302438922	+	2	726	147
ALDBSSCT0000000014	ALDBSSCG0000000008	--	--	lincRNA	Annotated_lncRNA	chr1	3680953	3688877	+	2	385	124
ALDBSSCT0000000398	ALDBSSCG0000000231	--	--	lincRNA	Annotated_lncRNA	chr1	201795313	201814332	+	2	240	80
ALDBSSCT0000000399	ALDBSSCG0000000232	--	--	lincRNA	Annotated_lncRNA	chr1	202677600	202678228	+	2	622	53
ALDBSSCT0000002686	ALDBSSCG0000001631	--	--	lincRNA	Annotated_lncRNA	chr13	81539717	81540448	+	2	727	87
ALDBSSCT0000007316	ALDBSSCG0000004441	--	--	lincRNA	Annotated_lncRNA	chr3	118595639	118597927	-	2	783	104
ALDBSSCT0000008879	ALDBSSCG0000005426	--	--	lincRNA	Annotated_lncRNA	chr6	54602687	54608041	+	2	3513	255
ALDBSSCT0000008893	ALDBSSCG0000005434	--	--	lincRNA	Annotated_lncRNA	chr6	57378291	57383982	+	2	1687	191
ALDBSSCT0000007999	ALDBSSCG0000004852	--	--	lincRNA	Annotated_lncRNA	chr4	81625846	81656141	-	2	363	120
ALDBSSCT0000000462	ALDBSSCG0000000274	--	--	lincRNA	Annotated_lncRNA	chr1	252245129	252365670	+	7	798	72
ALDBSSCT0000010296	ALDBSSCG0000006258	--	--	lincRNA	Annotated_lncRNA	chr7	105955417	105959130	-	2	2229	179
ALDBSSCT0000002527	ALDBSSCG0000001527	--	--	lincRNA	Annotated_lncRNA	chr12	60857279	60869610	-	5	3380	143
ALDBSSCT0000000018	ALDBSSCG0000000011	--	--	lincRNA	Annotated_lncRNA	chr1	4042064	4080604	+	2	1012	201
ALDBSSCT0000011956	ALDBSSCG0000007276	--	--	lincRNA	Annotated_lncRNA	chrX	98830979	98831537	+	2	389	103
ALDBSSCT0000009737	ALDBSSCG0000005937	--	--	lincRNA	Annotated_lncRNA	chr7	39641840	39694302	+	4	10828	330
ALDBSSCT0000007865	ALDBSSCG0000004760	--	--	lincRNA	Annotated_lncRNA	chr4	9144985	9146322	-	2	363	92
ALDBSSCT0000002115	ALDBSSCG0000001268	--	--	lincRNA	Annotated_lncRNA	chr12	1573103	1577376	+	2	3667	310
ALDBSSCT0000005936	ALDBSSCG0000003626	--	--	lincRNA	Annotated_lncRNA	chr2	78372077	78376327	+	2	613	143
ALDBSSCT0000011524	ALDBSSCG0000007002	--	--	lincRNA	Annotated_lncRNA	chr9	46852304	46890768	-	6	15532	121
ALDBSSCT0000010302	ALDBSSCG0000006263	--	--	lincRNA	Annotated_lncRNA	chr7	110319998	110352564	-	2	420	113
ALDBSSCT0000002119	ALDBSSCG0000001270	--	--	lincRNA	Annotated_lncRNA	chr12	3348818	3351941	+	2	559	82
ALDBSSCT0000010300	ALDBSSCG0000006261	--	--	lincRNA	Annotated_lncRNA	chr7	109543897	109545753	-	2	1232	131
ALDBSSCT0000010105	ALDBSSCG0000006154	--	--	lincRNA	Annotated_lncRNA	chr7	29193561	29196499	-	2	1730	89
ALDBSSCT0000005312	ALDBSSCG0000003216	--	--	lincRNA	Annotated_lncRNA	chr17	29866786	29870712	-	2	465	153
ALDBSSCT0000012024	ALDBSSCG0000007329	--	--	lincRNA	Annotated_lncRNA	chrX	47152968	47160073	-	2	6571	167
ALDBSSCT0000012083	ALDBSSCG0000007367	--	--	lincRNA	Annotated_lncRNA	chrX	126642324	126650703	-	4	3695	260
ALDBSSCT0000004733	ALDBSSCG0000002882	--	--	lincRNA	Annotated_lncRNA	chr16	29094131	29100836	+	3	1536	151
ALDBSSCT0000000490	ALDBSSCG0000000292	--	--	lincRNA	Annotated_lncRNA	chr1	267659342	267660158	+	2	811	52
ALDBSSCT0000011860	ALDBSSCG0000007207	--	--	lincRNA	Annotated_lncRNA	JH118414.1	96438	99193	-	2	266	82
ALDBSSCT0000003946	ALDBSSCG0000002377	--	--	lincRNA	Annotated_lncRNA	chr14	68150707	68152942	-	2	547	121
ALDBSSCT0000010379	ALDBSSCG0000006302	--	--	lincRNA	Annotated_lncRNA	chr8	878838	891403	+	3	1648	141
ALDBSSCT0000010377	ALDBSSCG0000006301	--	--	lincRNA	Annotated_lncRNA	chr8	31150	32686	+	2	237	79
ALDBSSCT0000007945	ALDBSSCG0000004816	--	--	lincRNA	Annotated_lncRNA	chr4	46416246	46419945	-	2	423	102
ALDBSSCT0000012026	ALDBSSCG0000007331	--	--	lincRNA	Annotated_lncRNA	chrX	48401785	48405653	-	2	1523	138
ALDBSSCT0000010372	ALDBSSCG0000006299	--	--	lincRNA	Annotated_lncRNA	chr7	132156844	132164547	-	2	4842	253
ALDBSSCT0000010278	ALDBSSCG0000006248	--	--	lincRNA	Annotated_lncRNA	chr7	97495039	97533065	-	3	567	134
ALDBSSCT0000010279	ALDBSSCG0000006248	--	--	lincRNA	Annotated_lncRNA	chr7	97495039	97533222	-	3	365	85
ALDBSSCT0000010786	ALDBSSCG0000006524	--	--	lincRNA	Annotated_lncRNA	chr8	18156197	18170577	-	4	912	173
ALDBSSCT0000011208	ALDBSSCG0000006806	--	--	lincRNA	Annotated_lncRNA	chr9	62457891	62465608	+	4	6456	138
ENSSSCT00000033840	ENSSSCG00000017791	SSH2	-	processed_transcript	Annotated_lncRNA	chr12	47804289	47871712	+	13	9032	1036
ALDBSSCT0000001422	ALDBSSCG0000000860	--	--	lincRNA	Annotated_lncRNA	chr10	14969586	14976442	-	4	472	95
ENSSSCT00000035807	ENSSSCG00000031038	MORC4	-	processed_transcript	Annotated_lncRNA	chrX	101815818	101816384	+	2	449	149
ALDBSSCT0000004147	ALDBSSCG0000002500	--	--	lincRNA	Annotated_lncRNA	chr15	20832972	21326794	+	3	776	120
ALDBSSCT0000007107	ALDBSSCG0000004323	--	--	lincRNA	Annotated_lncRNA	chr3	39866204	39914443	-	3	1201	189
ALDBSSCT0000001429	ALDBSSCG0000000865	--	--	lincRNA	Annotated_lncRNA	chr10	15799838	15809461	-	2	9525	176
ALDBSSCT0000004067	ALDBSSCG0000002459	--	--	lincRNA	Annotated_lncRNA	chr14	139034758	139051363	-	2	427	99
ALDBSSCT0000006453	ALDBSSCG0000003937	--	--	lincRNA	Annotated_lncRNA	chr2	140550670	140552295	-	2	1618	161
ALDBSSCT0000011654	ALDBSSCG0000007076	--	--	lincRNA	Annotated_lncRNA	chr9	119153106	119157413	-	2	233	77
ALDBSSCT0000011652	ALDBSSCG0000007075	--	--	lincRNA	Annotated_lncRNA	chr9	115556204	115581661	-	2	3222	91
ALDBSSCT0000005127	ALDBSSCG0000003086	--	--	lincRNA	Annotated_lncRNA	chr17	12830685	12837404	+	4	1258	151
ALDBSSCT0000009186	ALDBSSCG0000005594	--	--	lincRNA	Annotated_lncRNA	chr6	156399133	156413422	+	5	2025	142
ALDBSSCT0000008517	ALDBSSCG0000005182	--	--	lincRNA	Annotated_lncRNA	chr5	18862176	18868597	-	3	1458	131
ALDBSSCT0000010016	ALDBSSCG0000006091	--	--	lincRNA	Annotated_lncRNA	chr7	3173962	3184714	-	2	1630	240
ALDBSSCT0000006180	ALDBSSCG0000003778	--	--	lincRNA	Annotated_lncRNA	chr2	12903561	12909123	-	2	533	103
ALDBSSCT0000006187	ALDBSSCG0000003784	--	--	lincRNA	Annotated_lncRNA	chr2	17593047	17599056	-	3	4948	290
ALDBSSCT0000000266	ALDBSSCG0000000160	--	--	lincRNA	Annotated_lncRNA	chr1	136407520	136441360	+	3	259	61
ALDBSSCT0000007815	ALDBSSCG0000004732	--	--	lincRNA	Annotated_lncRNA	chr4	143226509	143227305	+	2	430	143
ALDBSSCT0000008123	ALDBSSCG0000004929	--	--	lincRNA	Annotated_lncRNA	chr4	117786465	117788082	-	2	437	95
ALDBSSCT0000011481	ALDBSSCG0000006989	--	--	lincRNA	Annotated_lncRNA	chr9	40835708	40837689	-	2	1537	109
ALDBSSCT0000006815	ALDBSSCG0000004157	--	--	lincRNA	Annotated_lncRNA	chr3	103473621	103479372	+	2	2909	119
ALDBSSCT0000002740	ALDBSSCG0000001661	--	--	lincRNA	Annotated_lncRNA	chr13	98830069	98837979	+	2	913	75
ALDBSSCT0000006368	ALDBSSCG0000003898	--	--	lincRNA	Annotated_lncRNA	chr2	94460334	94655203	-	4	912	132
ALDBSSCT0000010002	ALDBSSCG0000006084	--	--	lincRNA	Annotated_lncRNA	chr7	2414601	2440450	-	4	1792	122
ALDBSSCT0000010004	ALDBSSCG0000006084	--	--	lincRNA	Annotated_lncRNA	chr7	2414601	2440569	-	5	2239	122
ALDBSSCT0000011300	ALDBSSCG0000006863	--	--	lincRNA	Annotated_lncRNA	chr9	117706827	117729351	+	2	232	73
ALDBSSCT0000007166	ALDBSSCG0000004354	--	--	lincRNA	Annotated_lncRNA	chr3	51850718	51853752	-	3	2302	92
ALDBSSCT0000012064	ALDBSSCG0000007355	--	--	lincRNA	Annotated_lncRNA	chrX	112577343	112586062	-	2	311	89
ALDBSSCT0000011965	ALDBSSCG0000007282	--	--	lincRNA	Annotated_lncRNA	chrX	113105761	113109306	+	2	706	193
ALDBSSCT0000007564	ALDBSSCG0000004590	--	--	lincRNA	Annotated_lncRNA	chr4	73904660	73905895	+	2	909	110
ALDBSSCT0000005167	ALDBSSCG0000003119	--	--	lincRNA	Annotated_lncRNA	chr17	45907318	45908592	+	2	1066	104
ALDBSSCT0000011159	ALDBSSCG0000006773	--	--	lincRNA	Annotated_lncRNA	chr9	46795312	46810466	+	5	338	72
ALDBSSCT0000011251	ALDBSSCG0000006833	--	--	lincRNA	Annotated_lncRNA	chr9	77192480	77213385	+	3	343	48
ALDBSSCT0000002962	ALDBSSCG0000001783	--	--	lincRNA	Annotated_lncRNA	chr13	200136361	200140268	+	3	953	108
ALDBSSCT0000011149	ALDBSSCG0000006764	--	--	lincRNA	Annotated_lncRNA	chr9	39888942	39893105	+	2	364	86
ALDBSSCT0000008321	ALDBSSCG0000005052	--	--	lincRNA	Annotated_lncRNA	chr5	51968188	51974610	+	2	1156	89
ALDBSSCT0000011254	ALDBSSCG0000006835	--	--	lincRNA	Annotated_lncRNA	chr9	80845311	80972140	+	4	512	82
ALDBSSCT0000010092	ALDBSSCG0000006144	--	--	lincRNA	Annotated_lncRNA	chr7	26691565	26694519	-	2	2538	128
ALDBSSCT0000007109	ALDBSSCG0000004325	--	--	lincRNA	Annotated_lncRNA	chr3	40063804	40068561	-	2	625	99
ALDBSSCT0000011258	ALDBSSCG0000006839	--	--	lincRNA	Annotated_lncRNA	chr9	82781513	82783650	+	2	982	103
ALDBSSCT0000011155	ALDBSSCG0000006769	--	--	lincRNA	Annotated_lncRNA	chr9	44883511	44886875	+	3	1296	130
ALDBSSCT0000011156	ALDBSSCG0000006770	--	--	lincRNA	Annotated_lncRNA	chr9	44936940	44946387	+	2	655	151
ALDBSSCT0000005769	ALDBSSCG0000003505	--	--	lincRNA	Annotated_lncRNA	chr2	1464623	1467783	+	2	2550	138
ALDBSSCT0000003905	ALDBSSCG0000002347	--	--	lincRNA	Annotated_lncRNA	chr14	49655106	49657660	-	4	633	147
ALDBSSCT0000002596	ALDBSSCG0000001578	--	--	lincRNA	Annotated_lncRNA	chr13	26905543	26911288	+	2	2255	131
ALDBSSCT0000008372	ALDBSSCG0000005084	--	--	lincRNA	Annotated_lncRNA	chr5	70181154	70182673	+	3	947	92
ALDBSSCT0000007018	ALDBSSCG0000004267	--	--	lincRNA	Annotated_lncRNA	chr3	10914326	10921517	-	5	1644	203
ALDBSSCT0000003903	ALDBSSCG0000002347	--	--	lincRNA	Annotated_lncRNA	chr14	49655106	49657382	-	3	296	98
ALDBSSCT0000000302	ALDBSSCG0000000175	--	--	lincRNA	Annotated_lncRNA	chr1	146452635	146455120	+	2	573	101
ALDBSSCT0000001885	ALDBSSCG0000001141	--	--	lincRNA	Annotated_lncRNA	chr11	6809063	6819245	-	2	2140	118
ALDBSSCT0000011633	ALDBSSCG0000007063	--	--	lincRNA	Annotated_lncRNA	chr9	102937494	102941484	-	4	2087	120
ENSSSCT00000034217	ENSSSCG00000008496	EIF2AK2	-	processed_transcript	Annotated_lncRNA	chr3	109622369	109667785	+	16	2281	359
ALDBSSCT0000002529	ALDBSSCG0000001528	--	--	lincRNA	Annotated_lncRNA	chr12	61481534	61485420	-	2	335	96
ALDBSSCT0000004555	ALDBSSCG0000002770	--	--	lincRNA	Annotated_lncRNA	chr15	103457461	103543052	-	3	1186	80
ALDBSSCT0000001168	ALDBSSCG0000000721	--	--	lincRNA	Annotated_lncRNA	chr10	25782089	25785105	+	2	1915	195
ALDBSSCT0000004553	ALDBSSCG0000002769	--	--	lincRNA	Annotated_lncRNA	chr15	102503379	102522706	-	2	473	92
ALDBSSCT0000008687	ALDBSSCG0000005296	--	--	lincRNA	Annotated_lncRNA	chr5	105734690	105735982	-	2	1060	108
ALDBSSCT0000004497	ALDBSSCG0000002739	--	--	lincRNA	Annotated_lncRNA	chr15	73809125	73885492	-	3	748	108
ALDBSSCT0000004496	ALDBSSCG0000002738	--	--	lincRNA	Annotated_lncRNA	chr15	73126924	73189341	-	2	287	95
ALDBSSCT0000009984	ALDBSSCG0000006074	--	--	lincRNA	Annotated_lncRNA	chr7	130204880	130214654	+	3	884	215
ALDBSSCT0000005503	ALDBSSCG0000003335	--	--	lincRNA	Annotated_lncRNA	chr18	32046733	32066601	+	2	487	123
ALDBSSCT0000004490	ALDBSSCG0000002736	--	--	lincRNA	Annotated_lncRNA	chr15	71765715	71823466	-	2	912	117
ALDBSSCT0000011472	ALDBSSCG0000006981	--	--	lincRNA	Annotated_lncRNA	chr9	30909860	30917948	-	3	3246	126
ALDBSSCT0000008373	ALDBSSCG0000005085	--	--	lincRNA	Annotated_lncRNA	chr5	72402263	72409790	+	2	494	55
ENSSSCT00000032859	ENSSSCG00000030767	TMP-SLA-5	-	processed_transcript	Annotated_lncRNA	chr7	24721026	24724165	-	8	1147	256
ALDBSSCT0000006355	ALDBSSCG0000003889	--	--	lincRNA	Annotated_lncRNA	chr2	90010530	90011407	-	2	672	123
ALDBSSCT0000001865	ALDBSSCG0000001128	--	--	lincRNA	Annotated_lncRNA	chr11	3470218	3471113	-	2	489	62
ALDBSSCT0000000849	ALDBSSCG0000000514	--	--	lincRNA	Annotated_lncRNA	chr1	155388524	155395554	-	2	327	106
ALDBSSCT0000001866	ALDBSSCG0000001129	--	--	lincRNA	Annotated_lncRNA	chr11	3471748	3474068	-	2	2178	187
ALDBSSCT0000003041	ALDBSSCG0000001821	--	--	lincRNA	Annotated_lncRNA	chr13	218076783	218078538	+	6	348	116
ALDBSSCT0000001907	ALDBSSCG0000001154	--	--	lincRNA	Annotated_lncRNA	chr11	12808486	12814270	-	4	244	43
ENSSSCT00000035380	ENSSSCG00000031004	CH242-227G20.3	-	lincRNA	Annotated_lncRNA	chrX	22075081	22076913	+	1	1833	101
ALDBSSCT0000001905	ALDBSSCG0000001152	--	--	lincRNA	Annotated_lncRNA	chr11	12644125	12647359	-	3	899	126
ALDBSSCT0000003347	ALDBSSCG0000002013	--	--	lincRNA	Annotated_lncRNA	chr13	160470294	160477475	-	3	4212	127
ALDBSSCT0000009973	ALDBSSCG0000006066	--	--	lincRNA	Annotated_lncRNA	chr7	128587510	128588531	+	2	820	107
ENSSSCT00000036642	ENSSSCG00000030991	PDZD2	-	processed_transcript	Annotated_lncRNA	chr16	18897676	19288560	+	3	958	175
ALDBSSCT0000008807	ALDBSSCG0000005379	--	--	lincRNA	Annotated_lncRNA	chr6	40222451	40224902	+	3	1464	146
ALDBSSCT0000006272	ALDBSSCG0000003834	--	--	lincRNA	Annotated_lncRNA	chr2	49220742	49256853	-	2	319	81
ALDBSSCT0000008588	ALDBSSCG0000005228	--	--	lincRNA	Annotated_lncRNA	chr5	64777292	64804282	-	4	621	103
ENSSSCT00000021386	ENSSSCG00000019791	7SK	7SK RNA [Source:RFAM;Acc:RF00100]	misc_RNA	Annotated_lncRNA	chr7	31997223	31997523	-	1	301	72
ALDBSSCT0000006278	ALDBSSCG0000003837	--	--	lincRNA	Annotated_lncRNA	chr2	50583172	50615710	-	2	286	95
ALDBSSCT0000000073	ALDBSSCG0000000042	--	--	lincRNA	Annotated_lncRNA	chr1	23666364	23683362	+	4	780	111
ALDBSSCT0000007599	ALDBSSCG0000004608	--	--	lincRNA	Annotated_lncRNA	chr4	83972549	83975861	+	2	2354	164
ENSSSCT00000035929	ENSSSCG00000001727	TNFRSF21	-	processed_transcript	Annotated_lncRNA	chr7	48679157	48748680	-	6	3489	481
ALDBSSCT0000007814	ALDBSSCG0000004731	--	--	lincRNA	Annotated_lncRNA	chr4	143207104	143207986	+	2	671	79
ALDBSSCT0000010893	ALDBSSCG0000006600	--	--	lincRNA	Annotated_lncRNA	chr8	75349973	75353117	-	2	3017	88
ENSSSCT00000032953	ENSSSCG00000030923	SBAB-554F3.8	-	processed_transcript	Annotated_lncRNA	chr7	29352892	29356446	-	3	585	140
ALDBSSCT0000010896	ALDBSSCG0000006603	--	--	lincRNA	Annotated_lncRNA	chr8	78359320	78367380	-	2	3733	125
ALDBSSCT0000010894	ALDBSSCG0000006601	--	--	lincRNA	Annotated_lncRNA	chr8	75370483	75372023	-	2	1355	105
ALDBSSCT0000004250	ALDBSSCG0000002575	--	--	lincRNA	Annotated_lncRNA	chr15	93751638	93777171	+	6	595	169
ALDBSSCT0000004253	ALDBSSCG0000002576	--	--	lincRNA	Annotated_lncRNA	chr15	93762186	93771400	+	4	2973	469
ALDBSSCT0000010950	ALDBSSCG0000006636	--	--	lincRNA	Annotated_lncRNA	chr8	108197217	108199556	-	2	1616	145
ALDBSSCT0000004257	ALDBSSCG0000002577	--	--	lincRNA	Annotated_lncRNA	chr15	93787066	93787827	+	2	438	60
ALDBSSCT0000005212	ALDBSSCG0000003147	--	--	lincRNA	Annotated_lncRNA	chr17	57151362	57158294	+	2	346	115
ALDBSSCT0000008329	ALDBSSCG0000005055	--	--	lincRNA	Annotated_lncRNA	chr5	53006722	53196500	+	6	827	74
ALDBSSCT0000002927	ALDBSSCG0000001761	--	--	lincRNA	Annotated_lncRNA	chr13	179735224	179790925	+	4	466	67
ALDBSSCT0000005217	ALDBSSCG0000003152	--	--	lincRNA	Annotated_lncRNA	chr17	58544604	58564700	+	2	5423	170
ENSSSCT00000021690	ENSSSCG00000020095	7SK	7SK RNA [Source:RFAM;Acc:RF00100]	misc_RNA	Annotated_lncRNA	chr1	35489275	35489549	-	1	275	41
ALDBSSCT0000007070	ALDBSSCG0000004297	--	--	lincRNA	Annotated_lncRNA	chr3	25694421	25703624	-	3	1193	133
ALDBSSCT0000011600	ALDBSSCG0000007043	--	--	lincRNA	Annotated_lncRNA	chr9	83363024	83393781	-	2	266	88
ALDBSSCT0000000763	ALDBSSCG0000000458	--	--	lincRNA	Annotated_lncRNA	chr1	93050423	93052185	-	2	896	120
ALDBSSCT0000004586	ALDBSSCG0000002789	--	--	lincRNA	Annotated_lncRNA	chr15	122101803	122120137	-	3	4237	111
ALDBSSCT0000007075	ALDBSSCG0000004300	--	--	lincRNA	Annotated_lncRNA	chr3	28055138	28160146	-	2	233	77
ALDBSSCT0000000766	ALDBSSCG0000000461	--	--	lincRNA	Annotated_lncRNA	chr1	97115283	97121416	-	2	1399	126
ALDBSSCT0000003602	ALDBSSCG0000002154	--	--	lincRNA	Annotated_lncRNA	chr14	51546850	51547751	+	2	263	87
ALDBSSCT0000003601	ALDBSSCG0000002154	--	--	lincRNA	Annotated_lncRNA	chr14	51546564	51547751	+	2	260	86
ALDBSSCT0000007158	ALDBSSCG0000004353	--	--	lincRNA	Annotated_lncRNA	chr3	51428337	51492277	-	3	475	156
ALDBSSCT0000001345	ALDBSSCG0000000824	--	--	lincRNA	Annotated_lncRNA	chr10	73618703	73633824	+	2	2398	196
ALDBSSCT0000008629	ALDBSSCG0000005251	--	--	lincRNA	Annotated_lncRNA	chr5	81203989	81205248	-	2	979	86
ALDBSSCT0000008084	ALDBSSCG0000004906	--	--	lincRNA	Annotated_lncRNA	chr4	109365513	109366713	-	2	885	65
ALDBSSCT0000000164	ALDBSSCG0000000099	--	--	lincRNA	Annotated_lncRNA	chr1	81721000	81726044	+	2	900	168
ALDBSSCT0000008085	ALDBSSCG0000004907	--	--	lincRNA	Annotated_lncRNA	chr4	109825189	109830902	-	3	249	58
ALDBSSCT0000006002	ALDBSSCG0000003667	--	--	lincRNA	Annotated_lncRNA	chr2	121832962	121834335	+	2	970	174
ALDBSSCT0000006001	ALDBSSCG0000003666	--	--	lincRNA	Annotated_lncRNA	chr2	121657062	121717825	+	4	1545	112
ALDBSSCT0000009144	ALDBSSCG0000005573	--	--	lincRNA	Annotated_lncRNA	chr6	146521008	146524413	+	2	1675	81
ALDBSSCT0000006004	ALDBSSCG0000003669	--	--	lincRNA	Annotated_lncRNA	chr2	122403735	122491639	+	5	641	80
ALDBSSCT0000008739	ALDBSSCG0000005332	--	--	lincRNA	Annotated_lncRNA	chr6	12007618	12008074	+	2	305	101
ALDBSSCT0000005955	ALDBSSCG0000003639	--	--	lincRNA	Annotated_lncRNA	chr2	92317501	92365020	+	2	586	154
ALDBSSCT0000008734	ALDBSSCG0000005327	--	--	lincRNA	Annotated_lncRNA	chr6	8574418	8578292	+	2	1411	96
ALDBSSCT0000009145	ALDBSSCG0000005574	--	--	lincRNA	Annotated_lncRNA	chr6	147752785	147757781	+	2	3770	109
ALDBSSCT0000011552	ALDBSSCG0000007010	--	--	lincRNA	Annotated_lncRNA	chr9	54385430	54440678	-	4	2327	222
ALDBSSCT0000005819	ALDBSSCG0000003538	--	--	lincRNA	Annotated_lncRNA	chr2	16111642	16112999	+	3	647	88
ALDBSSCT0000003280	ALDBSSCG0000001977	--	--	lincRNA	Annotated_lncRNA	chr13	134107918	134138963	-	2	1721	172
ALDBSSCT0000008637	ALDBSSCG0000005257	--	--	lincRNA	Annotated_lncRNA	chr5	83802699	83804744	-	2	673	163
ALDBSSCT0000005183	ALDBSSCG0000003129	--	--	lincRNA	Annotated_lncRNA	chr17	49565729	49578420	+	2	410	60
ALDBSSCT0000005180	ALDBSSCG0000003126	--	--	lincRNA	Annotated_lncRNA	chr17	47214004	47215890	+	3	846	151
ALDBSSCT0000007110	ALDBSSCG0000004326	--	--	lincRNA	Annotated_lncRNA	chr3	40145454	40147223	-	2	1061	119
ENSSSCT00000026977	ENSSSCG00000004334	MAP3K7	-	processed_transcript	Annotated_lncRNA	chr1	65479754	65542430	-	19	1740	579
ALDBSSCT0000011875	ALDBSSCG0000007221	--	--	lincRNA	Annotated_lncRNA	JH118841.1	93201	93990	+	2	375	86
ALDBSSCT0000007671	ALDBSSCG0000004659	--	--	lincRNA	Annotated_lncRNA	chr4	110271463	110278831	+	4	627	116
ALDBSSCT0000010434	ALDBSSCG0000006339	--	--	lincRNA	Annotated_lncRNA	chr8	30782247	30784949	+	2	527	109
ALDBSSCT0000007674	ALDBSSCG0000004660	--	--	lincRNA	Annotated_lncRNA	chr4	111540349	111542601	+	2	2246	162
ALDBSSCT0000004164	ALDBSSCG0000002515	--	--	lincRNA	Annotated_lncRNA	chr15	36235055	36264356	+	2	386	128
ALDBSSCT0000003263	ALDBSSCG0000001969	--	--	lincRNA	Annotated_lncRNA	chr13	128022007	128023189	-	3	319	64
ALDBSSCT0000009620	ALDBSSCG0000005869	--	--	lincRNA	Annotated_lncRNA	chr7	4525577	4590732	+	4	696	231
ALDBSSCT0000002648	ALDBSSCG0000001610	--	--	lincRNA	Annotated_lncRNA	chr13	60043650	60044552	+	2	261	87
ALDBSSCT0000006410	ALDBSSCG0000003916	--	--	lincRNA	Annotated_lncRNA	chr2	121363171	121370570	-	2	2960	86
ALDBSSCT0000003308	ALDBSSCG0000001990	--	--	lincRNA	Annotated_lncRNA	chr13	145780655	145783897	-	2	2971	134
ALDBSSCT0000012062	ALDBSSCG0000007353	--	--	lincRNA	Annotated_lncRNA	chrX	109579209	109581842	-	2	1664	121
ALDBSSCT0000000505	ALDBSSCG0000000299	--	--	lincRNA	Annotated_lncRNA	chr1	278467958	278469852	+	2	801	100
ALDBSSCT0000003304	ALDBSSCG0000001986	--	--	lincRNA	Annotated_lncRNA	chr13	141254268	141257694	-	2	286	67
[truncated: 80 more rows]
