# Supplementary material for: Systematic Analysis of Long Non-Coding RNAs and mRNAs in the Ovaries of Duroc Pigs During Different Follicular Stages Using RNA Sequencing
Source: Int J Mol Sci. 2018 Jun 11;19(6):1722. doi: 10.3390/ijms19061722 (PMC6032137; doi:10.3390/ijms19061722)
Supplement: Supplementary file 1 [file ijms-19-01722-s001.zip › Supplementary Table S2.xlsx]

## Sheet: Table S2
Systematic analysis of long non-coding RNAs and mRNAs in the ovaries of Duroc pigs during different follicular stages using RNA sequencing Yi Liu, Mengxun Li, Xinwen Bo, Li Tao, Lipeng Ma, Tenjiao Zhai, Tao Huang
Supplementary Table S2. The information of differentially expressed 39 lncRNA transcripts (8 up-regulated and 31 down-regulated) and 521 mRNA transcripts (220 up-regulated and 301 down-regulated) in the DOVADAY0 and DOVADAY2 comparison group.
transcript_id	gene_id	gene_name	gene_location	DOVADAY2_FPKM	DOVADAY0_FPKM	log2(foldchange)	pvalue	qvalue
LNC_000445	XLOC_036987	-	chr2:120846158-120864261	3.98602	0.301913	3.72275	5.22534e-05	0.00375709
LNC_000688	XLOC_062673	-	chr9:52590728-52594910	0.756179	0	inf	0.00150213	0.0479658
ALDBSSCT0000002757	ALDBSSCG0000001672	-	chr13:107046763-107049932	92.245	33.0331	1.48156	1.56168e-06	0.000208298
LNC_000641	XLOC_058577	-	chr8:38812516-38844825	2.43291	0	inf	0.000254898	0.0129673
LNC_000199	XLOC_014295	-	chr10:13669070-13737338	1.00367	0	inf	0.000260122	0.0131383
LNC_000527	XLOC_045295	-	chr4:82212018-82215590	2.95882	0.437634	2.75722	3.04803e-05	0.00242199
ALDBSSCT0000011771	ALDBSSCG0000007136	-	chr9:148558386-148568813	4.06986	1.31597	1.62885	0.00147308	0.0475225
LNC_000126	XLOC_007107	-	JH118856.1:52366-56511	11.1271	3.06962	1.85795	6.03071e-06	0.000664728
ENSSSCT00000034907	ENSSSCG00000030790	TMP-CH242-74M17.6	chr7:24626855-24627344	212.258	735.804	-1.7935	2.78266e-08	6.76891e-06
LNC_000369	XLOC_030330	-	chr15:144223853-144238760	0.664846	1.84103	-1.46942	8.02649e-05	0.00521057
ALDBSSCT0000003347	ALDBSSCG0000002013	-	chr13:160470293-160477475	0	1.06837	#NAME?	0.000334487	0.0160637
ALDBSSCT0000011044	ALDBSSCG0000006703	-	chr9:3037294-3043877	0.0308256	1.00754	-5.03056	0.00083308	0.0316336
ALDBSSCT0000005854	ALDBSSCG0000003560	-	chr2:29432628-29480226	0	0.968449	#NAME?	0.000121486	0.0073109
ALDBSSCT0000000864	ALDBSSCG0000000525	-	chr1:163409500-163413651	0.0480294	1.72512	-5.16664	0.000584033	0.0242986
ALDBSSCT0000001157	ALDBSSCG0000000716	-	chr10:22597134-22603060	7.40144	14.4854	-0.968724	0.000867447	0.0325878
ALDBSSCT0000009580	ALDBSSCG0000005849	-	chr6:154686095-154703949	0	1.06415	#NAME?	0.000581679	0.0242643
ENSSSCT00000004790	ENSSSCG00000004334	MAP3K7	chr1:65478904-65542600	0.35064	4.97728	-3.82729	4.85639e-05	0.00355626
LNC_000300	XLOC_023710	-	chr13:159057050-159067397	0	1.10589	#NAME?	0.000684943	0.0272881
LNC_000590	XLOC_052149	-	chr6:62350602-62363640	0	1.16416	#NAME?	0.000209132	0.0111482
LNC_000597	XLOC_053452	-	chr7:13885670-13892094	0.0944324	1.00895	-3.41744	6.03821e-05	0.00415791
LNC_000382	XLOC_031792	-	chr16:41617925-41620817	0.115445	0.817643	-2.82427	0.000876802	0.0326878
LNC_000385	XLOC_032394	-	chr16:75775735-75817423	0.869956	5.10543	-2.55302	3.27498e-05	0.00256698
LNC_000386	XLOC_032394	-	chr16:75775735-75817423	0	5.2824	#NAME?	6.88067e-06	0.000741675
ALDBSSCT0000003992	ALDBSSCG0000002403	-	chr14:86349852-86352208	0.616201	2.42385	-1.97583	0.00112157	0.0390821
LNC_000200	XLOC_014295	-	chr10:13669070-13737338	0	0.815683	#NAME?	0.00052975	0.0225727
LNC_000639	XLOC_058442	-	chr8:18134617-18143882	0	1.15975	#NAME?	0.00128442	0.0427391
ALDBSSCT0000008015	ALDBSSCG0000004861	-	chr4:83692398-83694744	1.14056	4.73892	-2.05481	0.000330439	0.0159054
ALDBSSCT0000009009	ALDBSSCG0000005505	-	chr6:94573666-94724597	2.9879	54.0733	-4.17771	2.41968e-08	6.09616e-06
ALDBSSCT0000008750	ALDBSSCG0000005341	-	chr6:16387918-16400028	0	1.75351	#NAME?	0.000483714	0.0211211
ALDBSSCT0000008522	ALDBSSCG0000005185	-	chr5:20091140-20097043	0	2.71884	#NAME?	0.00109505	0.0383683
LNC_000557	XLOC_048705	-	chr5:90633910-90650280	0.484061	2.44159	-2.33456	6.20041e-10	2.40035e-07
LNC_000266	XLOC_020820	-	chr13:157485791-157501001	0.0362871	0.817214	-4.49318	6.9996e-07	0.000106826
ALDBSSCT0000008020	ALDBSSCG0000004863	-	chr4:83948291-83956904	0.238082	1.02228	-2.10227	0.000709476	0.0280473
LNC_000166	XLOC_011637	-	chr1:126367881-126374197	2.27827	15.6764	-2.78258	2.34374e-06	0.000296251
LNC_000286	XLOC_022688	-	chr13:91465607-91478421	0.899129	4.20111	-2.22417	0.000446823	0.0199918
LNC_000585	XLOC_051837	-	chr6:48257518-48260877	0.0579532	1.04192	-4.16821	0.000157387	0.00893768
LNC_000127	XLOC_007130	-	JH118868.1:102905-106741	0.0207526	0.882296	-5.4099	0.000302145	0.0148705
ALDBSSCT0000003576	ALDBSSCG0000002142	-	chr14:47033901-47045716	0.74187	5.40788	-2.86583	0.000697888	0.0276236
ALDBSSCT0000002392	ALDBSSCG0000001450	-	chr12:20388990-20389633	40.8708	119.43	-1.54702	0.000700434	0.0277071
transcript_id	gene_id	gene_name	gene_location	DOVADAY2_FPKM	DOVADAY0_FPKM	log2(foldchange)	pvalue	qvalue
ENSSSCT00000006836	ENSSSCG00000006238	CYP7A1	chr4:81137357-81166797	1.1876	0.115041	3.36782	3.84908e-05	0.00292494
ENSSSCT00000031374	ENSSSCG00000021739	HSD17B12	chr2:20048440-20211950	32.2389	12.9779	1.31275	8.29973e-05	0.00536054
ENSSSCT00000023632	ENSSSCG00000024023	HNMT	chr15:16061797-16096556	38.0187	18.1895	1.0636	0.000614458	0.0251848
ENSSSCT00000016350	ENSSSCG00000014987	MMP12	chr9:37420649-37431228	1.56124	0.22368	2.80318	0.0011694	0.0401536
ENSSSCT00000008343	ENSSSCG00000007603	NPTX2	chr3:5732131-5740519	166.12	35.3792	2.23126	2.3026e-13	2.86285e-10
ENSSSCT00000010022	ENSSSCG00000009152	SGMS2	chr8:122315431-122406939	21.3205	4.83021	2.14208	1.53699e-12	1.39403e-09
ENSSSCT00000009565	ENSSSCG00000008742	CD38	chr8:10731288-10781193	7.23647	2.95845	1.29045	0.0014355	0.0465466
ENSSSCT00000035987	ENSSSCG00000030778	MFI2	chr13:142726243-142751987	3.78854	0.267216	3.82556	0.00107149	0.0378564
ENSSSCT00000011497	ENSSSCG00000010507	TLL2	chr14:117454644-117514823	3.90295	1.03093	1.92062	0.000189457	0.0103962
ENSSSCT00000034901	ENSSSCG00000011723	MME	chr13:103030829-103128284	103.353	48.6858	1.08601	0.000152884	0.00874453
ENSSSCT00000013798	ENSSSCG00000012619	2018-09-06	chrX:113558631-113632317	1.54268	0	inf	0.000294548	0.0145984
ENSSSCT00000027475	ENSSSCG00000025206	RNF19B	chr6:83253109-83277474	34.5072	11.2626	1.61535	1.23663e-07	2.39504e-05
ENSSSCT00000006174	ENSSSCG00000005615	PTRH1	chr1:302105645-302107569	20.1946	3.68278	2.45511	2.46492e-06	0.000309279
ENSSSCT00000011522	ENSSSCG00000010532	-	chr14:118983459-119000701	37.3655	14.2358	1.39219	9.98832e-07	0.000143798
ENSSSCT00000015416	ENSSSCG00000014113	HOMER1	chr2:89844359-89996126	16.2033	6.02548	1.42714	5.07129e-06	0.000570368
ENSSSCT00000004678	ENSSSCG00000004233	SMPDL3A	chr1:44076442-44094651	57.6778	26.983	1.09597	0.000209496	0.0111583
ENSSSCT00000007615	ENSSSCG00000006950	WDR63	chr4:143403043-143464005	10.6748	4.74375	1.17011	0.000890232	0.0330913
ENSSSCT00000029103	ENSSSCG00000027830	-	JH118654.1:104053-110261	44.205	2.23712	4.3045	4.6795e-11	2.5269e-08
ENSSSCT00000019166	ENSSSCG00000017605	MMD	chr12:32362123-32389071	107.073	57.5474	0.895775	0.00116531	0.0400783
ENSSSCT00000017258	ENSSSCG00000015850	DUSP4	chr15:62906028-62923416	123.721	33.0719	1.90341	6.83678e-10	2.59917e-07
ENSSSCT00000007584	ENSSSCG00000006924	GBP1	chr4:139650957-139667272	27.7127	10.2779	1.431	1.02938e-06	0.000147527
ENSSSCT00000028723	ENSSSCG00000029710	GCNT4	chr2:85693063-85722431	11.2122	4.69772	1.25504	5.6733e-05	0.00399326
ENSSSCT00000012333	ENSSSCG00000011265	XIRP1	chr13:26127753-26137301	3.78872	0.143845	4.71912	2.08722e-14	4.05834e-11
ENSSSCT00000008936	ENSSSCG00000008159	IL1RL1	chr3:54374029-54518149	7.52396	0.26571	4.82357	4.03462e-11	2.26685e-08
ENSSSCT00000007507	ENSSSCG00000023098	-	chr4:126313701-126321860	35.3865	7.11171	2.31493	2.04347e-10	9.267e-08
ENSSSCT00000007508	ENSSSCG00000022983	-	chr4:126526445-126534670	54.9013	13.6502	2.00791	3.07113e-10	1.30861e-07
ENSSSCT00000026441	ENSSSCG00000027287	TMEM189	chr17:57826766-57852468	36.7199	17.7094	1.05204	0.00015486	0.00882577
ENSSSCT00000018997	ENSSSCG00000017451	-	chr12:21754048-21754579	59.2593	0.788579	6.23164	7.45848e-13	8.02595e-10
ENSSSCT00000014867	ENSSSCG00000013612	ACP5	GL896326.1:1999-3913	145.056	40.4904	1.84096	2.44031e-10	1.07592e-07
ENSSSCT00000005701	ENSSSCG00000005171	-	chr1:227334092-227344720	157.849	41.9617	1.9114	1.82849e-11	1.16089e-08
ENSSSCT00000031651	ENSSSCG00000021417	-	chr4:126676539-126682403	18.4779	4.16126	2.15071	1.22919e-06	0.000171517
ENSSSCT00000024294	ENSSSCG00000027643	DIO2	chr7:109298355-109308540	6.889	1.84895	1.89759	0.000139854	0.00819867
ENSSSCT00000005748	ENSSSCG00000005215	JAK2	chr1:242696462-242786177	34.5952	18.2991	0.9188	0.00119797	0.0408035
ENSSSCT00000000941	ENSSSCG00000000862	-	chr5:86352831-86413187	30.9585	14.7075	1.07378	0.000158396	0.00897896
ENSSSCT00000007703	ENSSSCG00000007034	-	chr17:13663698-13667621	41.2828	17.0949	1.27198	5.86643e-05	0.00407498
ENSSSCT00000024739	ENSSSCG00000016345	-	chr15:153160291-153194892	4.2121	0.437762	3.26632	9.07308e-06	0.000933975
ENSSSCT00000010790	ENSSSCG00000009844	HSPB8	chr14:35688332-35701411	40.7137	14.6958	1.47011	6.34803e-06	0.00069262
ENSSSCT00000015569	ENSSSCG00000014249	2018-03-03	chr2:135176965-135323481	31.6404	14.8178	1.09443	0.000444497	0.0199158
ENSSSCT00000028918	ENSSSCG00000030140	-	chr4:126491805-126500728	30.4182	8.70802	1.80452	3.16241e-07	5.45593e-05
ENSSSCT00000028915	ENSSSCG00000000862	-	chr5:86352831-86413187	38.3134	16.3369	1.22972	1.2496e-05	0.00119123
ENSSSCT00000005328	ENSSSCG00000004826	VIMP	chr1:156057762-156066216	101.728	54.5685	0.89857	0.00121555	0.0410717
ENSSSCT00000031112	ENSSSCG00000028319	-	JH118932.1:48006-86320	90.7217	43.1037	1.07364	0.000968171	0.035286
ENSSSCT00000030396	ENSSSCG00000029796	KBTBD11	chr15:38048837-38050850	1.83895	0	inf	0.000720069	0.0283953
ENSSSCT00000030392	ENSSSCG00000026985	-	chr17:21669058-21703745	1.68742	0.0918621	4.1992	0.00012592	0.00754911
ENSSSCT00000012858	ENSSSCG00000011747	CLDN11	chr13:117956575-117971437	557.076	233.862	1.25222	0.000347591	0.0165926
ENSSSCT00000033268	ENSSSCG00000013297	CD44	chr2:28156391-28374853	38.4777	13.8682	1.47224	0.000290789	0.0144346
ENSSSCT00000027970	ENSSSCG00000004017	FRMD1	chr1:2657896-2672308	3.44337	0.749648	2.19954	0.000119473	0.00723781
ENSSSCT00000029342	ENSSSCG00000026749	-	GL892718.2:6382-13103	70.8284	19.6272	1.85147	1.08055e-09	3.92017e-07
ENSSSCT00000016279	ENSSSCG00000014923	RAB38	chr9:23798575-23863119	2.66801	0.41448	2.68639	0.000626809	0.0255919
ENSSSCT00000018386	ENSSSCG00000016882	PARP8	chr16:31878943-32060032	13.1857	5.38345	1.29237	6.98845e-06	0.000750744
ENSSSCT00000005998	ENSSSCG00000005453	TXN	chr1:282027081-282076574	2969.88	771.661	1.94437	2.38554e-11	1.44243e-08
ENSSSCT00000033597	ENSSSCG00000006059	NCALD	chr4:37897124-38264852	28.2977	12.5448	1.17359	0.000743274	0.029022
ENSSSCT00000028779	ENSSSCG00000015302	-	chr9:76903099-76934926	0.920911	0	inf	0.00128442	0.0427391
ENSSSCT00000018466	ENSSSCG00000016957	CD180	chr16:49212320-49229137	5.22176	1.9074	1.45293	0.00133292	0.0438914
ENSSSCT00000006279	ENSSSCG00000005710	LAMC3	chr1:304979407-305098340	2.45842	0	inf	1.77123e-07	3.2811e-05
ENSSSCT00000034445	ENSSSCG00000000687	CD4	chr5:66326562-66352898	1.85844	0.26058	2.83429	0.000761283	0.0295435
ENSSSCT00000001547	ENSSSCG00000001411	APOM	chr7:27478636-27495106	5.25465	0.614326	3.09652	0.000572037	0.0239723
ENSSSCT00000007358	ENSSSCG00000006717	PHGDH	chr4:111436316-111468486	30.4221	13.891	1.13097	0.000297851	0.0147047
ENSSSCT00000030269	ENSSSCG00000023034	-	chr4:126682470-126684129	75.688	10.0545	2.91222	4.67706e-07	7.57506e-05
ENSSSCT00000018753	ENSSSCG00000017226	FADS6	chr12:6343949-6356729	71.8839	35.8013	1.00566	0.000829775	0.031545
ENSSSCT00000011185	ENSSSCG00000010219	ARID5B	chr14:70609582-70684100	50.5345	26.1682	0.949454	0.00101344	0.0364132
ENSSSCT00000014468	ENSSSCG00000013248	LRP4	chr2:16981001-17020205	22.8207	3.01773	2.9188	0	0
ENSSSCT00000004091	ENSSSCG00000003693	MYOM1	chr6:96482620-96620109	4.07432	1.49065	1.45061	0.000316564	0.0153892
ENSSSCT00000033729	ENSSSCG00000009002	TLR2	chr8:79824540-79834592	15.001	6.58633	1.18751	0.000564622	0.0237399
ENSSSCT00000005812	ENSSSCG00000005277	GCNT1	chr1:256219661-256220948	46.0502	15.5651	1.5649	2.12244e-06	0.000273329
ENSSSCT00000009461	ENSSSCG00000008648	RSAD2	chr3:137667911-137683557	16.8977	6.26039	1.4325	0.0003524	0.0167765
ENSSSCT00000022705	ENSSSCG00000030298	-	chr5:7536000-7536585	29.8218	9.58328	1.63777	0.000725461	0.0285194
ENSSSCT00000008616	ENSSSCG00000007864	GPRC5B	chr3:26734479-26751349	101.872	35.2915	1.52937	2.82823e-07	4.94661e-05
ENSSSCT00000002757	ENSSSCG00000002481	SERPINA5	chr7:122915941-122927433	2.1586	0.423984	2.34802	0.00049512	0.0214718
ENSSSCT00000000251	ENSSSCG00000000232	ACVRL1	chr5:17855278-17871426	4.51639	1.58536	1.51036	0.0012184	0.0411462
ENSSSCT00000024901	ENSSSCG00000022789	-	chr13:183834655-183877970	63.9162	21.3821	1.57978	2.45925e-06	0.000309178
ENSSSCT00000012861	ENSSSCG00000011750	PLD1	chr13:119143380-119362303	59.3992	31.3458	0.922171	0.000846278	0.0319437
ENSSSCT00000027928	ENSSSCG00000010299	ANXA7	chr14:82330743-82360270	2.27924	0.212941	3.42003	0.000806694	0.0308912
ENSSSCT00000000208	ENSSSCG00000000195	PRPH	chr5:15691968-15695232	2.45967	0.297351	3.04823	0.0003663	0.0172394
ENSSSCT00000006968	ENSSSCG00000006359	ADAMTS4	chr4:97117568-97125927	9.80586	4.01762	1.2873	0.000304278	0.0149292
ENSSSCT00000022465	ENSSSCG00000009361	POSTN	chr11:13198181-13233797	102.952	49.0302	1.07023	0.000418493	0.019089
ENSSSCT00000016707	ENSSSCG00000015334	PDK4	chr9:82625076-82638263	111.147	54.1544	1.03732	0.000331416	0.0159404
ENSSSCT00000003977	ENSSSCG00000003582	SMPDL3B	chr6:78600671-78624777	18.1287	7.6742	1.24019	0.000373112	0.0174694
ENSSSCT00000036305	ENSSSCG00000012262	KDM6A	chrX:44567691-44704826	0.962031	0	inf	0.000450089	0.0200813
ENSSSCT00000031422	ENSSSCG00000027121	ODC1	GL894404.1:6995-13088	383.32	135.784	1.49723	8.56885e-07	0.000125641
ENSSSCT00000017758	ENSSSCG00000016306	-	chr15:148216755-148418220	0.937011	0	inf	0.000271623	0.0136433
ENSSSCT00000014215	ENSSSCG00000013004	TM7SF2	chr2:6208814-6213504	607.166	253.776	1.25853	0.000153346	0.00876306
ENSSSCT00000023029	ENSSSCG00000023165	SEMA7A	GL892482.1:46902-56335	44.4905	23.1862	0.940233	0.00135852	0.0445512
ENSSSCT00000018009	ENSSSCG00000016539	AKR1B1	chr18:15596720-15615030	302.691	122.167	1.30899	5.07581e-06	0.000570369
ENSSSCT00000032281	ENSSSCG00000021555	-	GL895228.2:2982-26454	35.6987	13.1881	1.43663	6.85985e-06	0.000740689
ENSSSCT00000036466	ENSSSCG00000000712	VWF	chr5:67005339-67078256	1.08238	0	inf	0.000144367	0.00838584
ENSSSCT00000036460	ENSSSCG00000012727	FMR1	chrX:137792660-137831725	4.10644	1.24895	1.71717	0.000545821	0.0230936
ENSSSCT00000009230	ENSSSCG00000008429	EPCAM	chr3:99312714-99328503	31.9105	12.7087	1.32822	4.6976e-05	0.00345993
ENSSSCT00000027894	ENSSSCG00000028204	-	chr9:50918842-50924246	4.10486	0.384416	3.41659	1.13933e-06	0.000161998
ENSSSCT00000036499	ENSSSCG00000031023	CD24	chr1:82268708-82273291	266.351	60.8948	2.12894	3.87024e-13	4.63618e-10
ENSSSCT00000012833	ENSSSCG00000011723	MME	chr13:103030829-103128284	20.4219	2.78393	2.87492	9.79714e-11	4.7847e-08
ENSSSCT00000010091	ENSSSCG00000009216	SPP1	chr8:140307937-140315415	360.461	83.9738	2.10183	8.08908e-13	8.14785e-10
ENSSSCT00000010095	ENSSSCG00000009219	IBSP	chr8:140438439-140452173	134.158	17.8495	2.90998	0	0
ENSSSCT00000014572	ENSSSCG00000013344	ANO5	chr2:40382283-40466246	9.55776	3.57778	1.41761	1.96937e-05	0.00170578
ENSSSCT00000011872	ENSSSCG00000010850	ENAH	chr10:16218455-16292135	87.6563	42.6934	1.03784	0.000176042	0.00979557
ENSSSCT00000034512	ENSSSCG00000009219	IBSP	chr8:140438439-140452173	271.22	38.7908	2.80568	0	0
ENSSSCT00000027582	ENSSSCG00000026081	-	chr15:104665230-104669898	92.0925	48.3428	0.929784	0.00103342	0.0368808
ENSSSCT00000016214	ENSSSCG00000014861	MOGAT2	chr9:11119061-11132962	8.63648	3.10171	1.47738	0.000790693	0.0303876
ENSSSCT00000006356	ENSSSCG00000005780	-	chr1:310303343-310328195	4.54157	0.989055	2.19907	0.000375829	0.017532
ENSSSCT00000030665	ENSSSCG00000025986	EDARADD	chr14:58899858-58965804	1.62542	0.269414	2.59291	0.000609283	0.0250699
ENSSSCT00000025489	ENSSSCG00000022099	TP53INP2	chr17:43299839-43308847	32.6928	14.0867	1.21464	1.5732e-05	0.0014228
ENSSSCT00000027500	ENSSSCG00000024674	ABL2	chr9:132671843-132782759	43.6138	11.7602	1.89087	4.61258e-11	2.5269e-08
ENSSSCT00000011452	ENSSSCG00000010464	-	chr14:112652686-112657270	42.7729	18.2128	1.23175	1.7639e-05	0.00156408
ENSSSCT00000025528	ENSSSCG00000028277	-	chr4:126555008-126563173	28.4945	6.605	2.10905	1.80702e-08	4.76092e-06
ENSSSCT00000029194	ENSSSCG00000029874	DUSP14	chr12:40507754-40616164	32.3968	9.27697	1.80413	1.5257e-06	0.000205658
ENSSSCT00000018405	ENSSSCG00000016900	-	chr16:36289024-36296446	61.3506	3.93551	3.96245	2.11342e-12	1.8636e-09
ENSSSCT00000015173	ENSSSCG00000013887	INSL3	chr2:59499015-59500655	180.917	83.8396	1.10962	0.000103865	0.00646497
ENSSSCT00000010933	ENSSSCG00000009977	RASL10A	chr14:49420328-49423167	6.56807	0.689424	3.25201	5.15078e-07	8.23722e-05
ENSSSCT00000006640	ENSSSCG00000006051	-	chr4:36579489-36591411	12.3261	4.07912	1.59539	0.000817505	0.0312102
ENSSSCT00000026454	ENSSSCG00000021595	RRAD	GL896432.1:1-2908	11.4804	1.63451	2.81224	2.58996e-05	0.00213551
ENSSSCT00000001000	ENSSSCG00000000916	LUM	chr5:96175703-96184752	37.6872	12.0609	1.64374	1.20083e-08	3.37342e-06
ENSSSCT00000001002	ENSSSCG00000000918	EPYC	chr5:96320059-96355948	6.56306	0	inf	1.85367e-05	0.00163003
ENSSSCT00000016988	ENSSSCG00000015595	ATF3	chr9:143690555-143703872	31.3657	8.9145	1.81496	5.47063e-08	1.18541e-05
ENSSSCT00000011983	ENSSSCG00000010948	CTSL	chr10:31837904-32028811	167.09	72.6054	1.20248	1.50486e-05	0.00137668
ENSSSCT00000000530	ENSSSCG00000000492	LYZ	chr5:36179189-36185575	246.268	58.6133	2.07093	5.44453e-13	6.06435e-10
ENSSSCT00000006562	ENSSSCG00000005979	ANXA13	chr4:16450336-16485285	3.77063	0.716096	2.39658	0.000365148	0.0172235
ENSSSCT00000006564	ENSSSCG00000005981	FBXO32	chr4:16638621-16669461	49.5624	17.6191	1.49211	4.03384e-07	6.66938e-05
ENSSSCT00000013131	ENSSSCG00000012000	-	chr13:184018401-184112967	88.364	32.7761	1.43081	2.54729e-06	0.00031773
ENSSSCT00000029764	ENSSSCG00000027982	ISG15	GL895967.2:58448-59139	56.0089	17.6756	1.66389	1.68782e-05	0.0015114
ENSSSCT00000025640	ENSSSCG00000027146	GLA	GL896183.1:73941-82624	192.648	95.5587	1.01151	0.000546267	0.0230936
ENSSSCT00000036240	ENSSSCG00000013297	CD44	chr2:28156391-28374853	3.46148	0.0947558	5.19103	1.19144e-05	0.00115663
ENSSSCT00000028617	ENSSSCG00000029877	MKRN2	chr13:75831025-75848212	3.94365	0	inf	4.96206e-06	0.000561562
ENSSSCT00000029569	ENSSSCG00000025300	-	chr4:126656601-126661097	28.9361	4.5399	2.67214	1.28651e-09	4.58871e-07
ENSSSCT00000004009	ENSSSCG00000003614	-	chr6:82666060-82668485	45.447	19.9801	1.18562	9.00156e-05	0.00572072
ENSSSCT00000009992	ENSSSCG00000009125	ANK2	chr8:117354891-117671790	10.6524	5.52676	0.94667	0.000657386	0.0264827
ENSSSCT00000018656	ENSSSCG00000017137	METRNL	chr12:554561-562054	71.0014	33.1218	1.10007	0.000878373	0.0327079
ENSSSCT00000007714	ENSSSCG00000007045	CHGB	chr17:15800453-15870087	4.43574	1.32727	1.74071	0.0004089	0.0187922
ENSSSCT00000004636	ENSSSCG00000004195	-	chr1:35580460-35594611	6.97808	0.533212	3.71005	1.58338e-09	5.55398e-07
ENSSSCT00000030171	ENSSSCG00000008624	-	chr3:133660274-133741130	6.8294	2.56983	1.41009	7.79898e-05	0.00509938
ENSSSCT00000026718	ENSSSCG00000023837	WFDC1	chr6:4754997-4789463	34.3562	16.9903	1.01586	0.000252991	0.0128909
ENSSSCT00000034196	ENSSSCG00000012126	GPM6B	chrX:11383150-11536112	1.59904	0	inf	0.000423982	0.0192987
ENSSSCT00000033082	ENSSSCG00000022107	CHTOP	chr4:104889208-104898793	2.22877	0	inf	0.00148225	0.0477121
ENSSSCT00000009828	ENSSSCG00000008973	NAAA	chr8:75709378-75738808	36.6479	18.6719	0.972863	0.000861124	0.0323694
ENSSSCT00000006731	ENSSSCG00000006138	ATP6V0D2	chr4:55660234-55715444	14.6014	2.78174	2.39205	7.81427e-09	2.3292e-06
ENSSSCT00000006943	ENSSSCG00000006335	RGS4	chr4:95096193-95103381	31.9196	10.7075	1.57582	1.24634e-07	2.40513e-05
ENSSSCT00000006945	ENSSSCG00000006337	HSD17B7	chr4:95571647-95594175	172.485	85.9399	1.00507	0.000303291	0.0149089
ENSSSCT00000033635	ENSSSCG00000012126	GPM6B	chrX:11383150-11536112	4.21848	0	inf	7.90745e-05	0.00515833
ENSSSCT00000025862	ENSSSCG00000023374	SRGN	chr14:78211061-78215931	162.068	88.4736	0.873279	0.00156967	0.0494574
ENSSSCT00000034028	ENSSSCG00000011946	ALCAM	chr13:162987675-163045773	76.238	40.7183	0.904832	0.00150067	0.0479658
ENSSSCT00000000879	ENSSSCG00000000810	AMIGO2	chr5:80651421-80652987	187.508	71.8724	1.38344	8.0855e-07	0.000119939
ENSSSCT00000022607	ENSSSCG00000022402	GRAMD3	GL892708.2:17884-46745	37.8656	16.5323	1.1956	4.92321e-05	0.00359222
ENSSSCT00000028769	ENSSSCG00000013344	ANO5	chr2:40382283-40466246	2.18891	0.39135	2.48368	5.35825e-05	0.00383097
ENSSSCT00000013182	ENSSSCG00000012050	RCAN1	chr13:207934801-207945091	52.3123	25.1503	1.05657	0.000178731	0.00989316
ENSSSCT00000004917	ENSSSCG00000004452	PRSS35	chr1:92967486-92968731	68.1101	8.65012	2.97708	4.44089e-16	1.40974e-12
ENSSSCT00000018296	ENSSSCG00000016806	CDH6	chr16:18351300-18479581	18.6578	8.93992	1.06145	0.000785306	0.0302171
ENSSSCT00000026649	ENSSSCG00000026018	MFSD1	chr13:107004093-107022592	143.62	53.5189	1.42414	3.80571e-07	6.34176e-05
ENSSSCT00000005886	ENSSSCG00000005347	POLR1E	chr1:266104600-266125742	11.6222	4.74533	1.2923	0.00136984	0.0448066
ENSSSCT00000013239	ENSSSCG00000012104	SHROOM2	chrX:6595888-6801781	1.68907	0.526693	1.68119	0.00126792	0.0424349
ENSSSCT00000003046	ENSSSCG00000002749	HP	chr6:14643377-14648241	642.546	102.364	2.65009	0	0
ENSSSCT00000024350	ENSSSCG00000028730	MEPE	chr8:140417802-140428568	3.87787	0	inf	0.000207709	0.011091
ENSSSCT00000016348	ENSSSCG00000014985	MMP1	chr9:37358376-37367260	10.8364	2.73279	1.98744	2.08721e-06	0.000269888
ENSSSCT00000005625	ENSSSCG00000005103	DET1	chr1:212696361-212718000	1.1787	0	inf	0.00150589	0.0480199
ENSSSCT00000030472	ENSSSCG00000028249	SKA3	chr11:440692-450696	1.46243	0	inf	0.0015319	0.0485976
ENSSSCT00000033711	ENSSSCG00000012118	TLR8	chrX:10500861-10512940	2.23805	0	inf	6.61145e-06	0.000717528
ENSSSCT00000002063	ENSSSCG00000001841	RHCG	chr7:60021998-60039452	3.51358	1.07316	1.71108	0.00124256	0.0417842
ENSSSCT00000035207	ENSSSCG00000007079	FLRT3	chr17:25670663-25684519	5.51317	1.97319	1.48235	0.000304139	0.0149292
ENSSSCT00000015390	ENSSSCG00000014089	F2RL2	chr2:87128323-87215914	21.797	4.45154	2.29175	5.3612e-11	2.81304e-08
ENSSSCT00000031638	ENSSSCG00000026449	KDM4A	GL895172.1:700-38924	11.6835	3.32369	1.81361	5.09654e-06	0.000570678
ENSSSCT00000017980	ENSSSCG00000016513	KIAA1549	chr18:11203163-11291469	0.924032	0.102644	3.1703	0.000949823	0.0348172
ENSSSCT00000033301	ENSSSCG00000004520	MAPK4	chr1:110082309-110155111	0.788058	0	inf	8.57515e-05	0.00550901
ENSSSCT00000023747	ENSSSCG00000025240	DDIT4L	chr8:129550396-129555105	18.9996	6.11303	1.63601	9.86644e-07	0.00014269
ENSSSCT00000031971	ENSSSCG00000008359	RAB1B	chr3:80675212-80706547	9.01417	0	inf	4.61097e-06	0.000528082
ENSSSCT00000031974	ENSSSCG00000023684	-	chr6:26353887-26411796	180.649	66.1636	1.44908	8.29069e-05	0.00536016
ENSSSCT00000025793	ENSSSCG00000004935	HACD3	chr1:181100249-181141948	49.7876	21.1662	1.23403	1.29178e-05	0.00121863
ENSSSCT00000012990	ENSSSCG00000011876	DTX3L	chr13:147573123-147581225	2.36359	0	inf	0.000119787	0.00723949
ENSSSCT00000000823	ENSSSCG00000000759	-	chr5:71087393-71087855	17.4919	1.70514	3.35873	7.34586e-05	0.00486321
ENSSSCT00000024632	ENSSSCG00000009049	USP38	chr8:89717749-89798021	0.861209	0	inf	0.000743129	0.029022
ENSSSCT00000010818	ENSSSCG00000009870	SDSL	chr14:40882874-40895873	9.29084	3.00912	1.62647	0.000842978	0.0318749
ENSSSCT00000026571	ENSSSCG00000028731	CXCL13	chr8:77268243-77274304	3.74264	0.414998	3.17288	0.000195891	0.0106663
ENSSSCT00000033226	ENSSSCG00000012362	ARHGEF9	chrX:56579849-56756533	1.24743	0	inf	0.00113791	0.0394564
ENSSSCT00000007217	ENSSSCG00000006588	S100A9	chr4:105063476-105066298	11.7358	1.61621	2.86023	0.00016092	0.00907001
ENSSSCT00000006624	ENSSSCG00000006035	ANGPT1	chr4:32646873-32751649	50.5445	17.5779	1.52379	8.00807e-06	0.000836225
ENSSSCT00000002979	ENSSSCG00000002686	HSD17B2	GL893173.1:14825-22427	109.635	32.9261	1.7354	2.02049e-05	0.0017335
ENSSSCT00000011352	ENSSSCG00000010370	ANXA8	chr14:95804111-95825709	9.48068	3.44083	1.46223	0.000540923	0.0229563
ENSSSCT00000015634	ENSSSCG00000014310	CXCL14	chr2:143444415-143453547	60.7632	16.4138	1.88829	5.42686e-10	2.11378e-07
ENSSSCT00000002057	ENSSSCG00000001835	ABHD2	chr7:59631040-59745342	79.0421	35.1398	1.16952	4.24819e-05	0.00316565
ENSSSCT00000032601	ENSSSCG00000007797	ITGAL	chr3:18259592-18298947	2.02418	0.193321	3.38827	0.000144863	0.00839929
ENSSSCT00000013150	ENSSSCG00000012019	TMPRSS15	chr13:192997370-193141213	6.46109	0.431091	3.90571	1.00917e-11	6.88938e-09
ENSSSCT00000027887	ENSSSCG00000029414	-	chr1:308216806-308223959	7.85635	1.61202	2.28499	6.11543e-05	0.0041929
ENSSSCT00000027416	ENSSSCG00000014121	ZFYVE16	chr2:90895540-90953249	11.8325	4.52235	1.38761	1.71559e-05	0.00153195
ENSSSCT00000035454	ENSSSCG00000013297	CD44	chr2:28156391-28374853	45.9719	19.4382	1.24186	3.43482e-05	0.00267575
ENSSSCT00000022747	ENSSSCG00000025216	-	chr4:126279065-126287844	26.5246	7.4654	1.82904	5.68219e-08	1.20654e-05
ENSSSCT00000026244	ENSSSCG00000022536	SLC37A2	chr9:57752749-57790694	19.8803	5.83124	1.76947	1.02154e-09	3.74892e-07
ENSSSCT00000013052	ENSSSCG00000011928	CCDC80	chr13:156787576-156826093	374.109	106.912	1.80703	6.76437e-07	0.000103485
ENSSSCT00000015476	ENSSSCG00000014167	-	chr2:106310502-106321615	85.2332	32.3566	1.39736	0.000135887	0.00802544
ENSSSCT00000015477	ENSSSCG00000014168	ELL2	chr2:106406383-106475265	50.8476	25.1165	1.01755	0.000369364	0.0173458
ENSSSCT00000015478	ENSSSCG00000014169	PCSK1	GL895717.1:69561-112481	48.0029	16.6691	1.52594	5.52875e-08	1.18988e-05
ENSSSCT00000031865	ENSSSCG00000029384	-	chr13:184210769-184232276	75.5539	27.4702	1.45964	1.85165e-05	0.00163003
ENSSSCT00000018621	ENSSSCG00000017103	SRD5A1	chr16:81668801-81694768	30.8129	13.5009	1.19048	2.9695e-05	0.00236848
ENSSSCT00000024662	ENSSSCG00000023032	SCG2	GL894571.1:2662-4960	7.93544	0.0382457	7.69687	1.47897e-07	2.80293e-05
ENSSSCT00000005396	ENSSSCG00000004890	SERPINB2	chr1:175502732-175517283	8.54943	0.472482	4.1775	4.36744e-11	2.43232e-08
ENSSSCT00000022397	ENSSSCG00000026196	-	chr8:139674388-139737897	35.9913	18.7933	0.93743	0.000730092	0.0286659
ENSSSCT00000029863	ENSSSCG00000027283	-	chr6:82831192-82921450	45.0476	19.6247	1.19878	7.38994e-05	0.00486859
ENSSSCT00000028117	ENSSSCG00000022028	-	chr17:13944225-14012072	40.5137	15.7831	1.36003	0.00120911	0.0409634
ENSSSCT00000030751	ENSSSCG00000029715	OLFM1	chr1:308316068-308353293	2.61608	0.281521	3.21609	9.74786e-05	0.00612755
ENSSSCT00000007520	ENSSSCG00000006867	LRRC39	chr4:129602974-129613275	106.922	47.7408	1.16326	0.000820331	0.0312805
ENSSSCT00000007525	ENSSSCG00000006872	AGL	chr4:129761869-129832535	94.017	25.5635	1.87884	1.58811e-10	7.46871e-08
ENSSSCT00000004688	ENSSSCG00000004241	GJA1	chr1:45543877-45557193	753.151	271.354	1.47276	0.000448085	0.0200285
ENSSSCT00000024378	ENSSSCG00000027206	PARD6B	chr17:58583133-58653888	42.788	8.47877	2.33528	3.55271e-15	8.67532e-12
ENSSSCT00000000698	ENSSSCG00000000647	OLR1	chr5:64579162-64590512	6.35329	1.86617	1.76743	8.48541e-05	0.00546934
ENSSSCT00000011620	ENSSSCG00000010624	DUSP5	chr14:131791152-131804261	21.6544	3.19456	2.76097	5.22471e-13	6.03112e-10
ENSSSCT00000011190	ENSSSCG00000010224	EGR2	chr14:71516962-71521113	3.46168	1.13469	1.60917	0.00143525	0.0465466
ENSSSCT00000010576	ENSSSCG00000009648	NEFM	chr14:10117157-10122555	3.98284	0.873359	2.18915	1.08914e-05	0.00108044
ENSSSCT00000013128	ENSSSCG00000011997	CHMP2B	chr13:179477028-179512316	58.2176	26.081	1.15845	4.79643e-05	0.00352454
ENSSSCT00000008101	ENSSSCG00000007401	SDC4	chr17:53254491-53270748	106.684	52.2399	1.03012	0.000603042	0.0249099
ENSSSCT00000005763	ENSSSCG00000005229	VLDLR	chr1:245001213-245032893	218.705	103.923	1.07347	0.000748527	0.0291554
ENSSSCT00000005762	ENSSSCG00000005228	KCNV2	chr1:244923141-244935596	1.60059	0.0544353	4.87792	0.00117626	0.0402586
ENSSSCT00000011937	ENSSSCG00000010908	PTPRC	chr10:26308758-26332284	1.31278	0	inf	0.000639413	0.0259563
ENSSSCT00000007644	ENSSSCG00000006979	MSR1	chr17:4110395-4191497	22.9357	9.37854	1.29016	0.000547516	0.0231125
ENSSSCT00000007647	ENSSSCG00000006982	ZDHHC2	chr17:5281875-5322408	29.0368	14.6493	0.987045	0.000446164	0.0199764
ENSSSCT00000035873	ENSSSCG00000012653	ZDHHC9	chrX:122170147-122205078	28.7934	10.6317	1.43736	6.15357e-05	0.00420996
ENSSSCT00000012478	ENSSSCG00000011400	SEMA3B	chr13:35921156-35928150	50.1882	19.5529	1.35997	1.67755e-06	0.000220967
ENSSSCT00000005448	ENSSSCG00000004937	SLC24A1	chr1:181204776-181300384	1.81053	0.441411	2.03622	0.000762534	0.0295739
ENSSSCT00000016774	ENSSSCG00000015399	SEMA3E	chr9:107013094-107133260	18.5793	5.782	1.68406	2.12399e-07	3.82011e-05
ENSSSCT00000030881	ENSSSCG00000024087	-	GL893554.2:81971-112317	1.00944	0.165141	2.61179	4.96919e-05	0.00360971
ENSSSCT00000003418	ENSSSCG00000003080	IGSF23	chr6:47050121-47057994	4.41489	0.503852	3.1313	0.000151677	0.00869903
ENSSSCT00000018280	ENSSSCG00000016792	FAM134B	chr16:6168455-6324546	70.703	23.7685	1.57272	4.4334e-08	9.87622e-06
ENSSSCT00000017880	ENSSSCG00000016420	INSIG1	chr18:2896504-3019640	217.633	101.632	1.09854	0.000368383	0.0173246
ENSSSCT00000025158	ENSSSCG00000030303	ACHE	chr3:8159349-8163719	3.49016	0.484541	2.8486	5.6437e-06	0.000626421
ENSSSCT00000032543	ENSSSCG00000023333	-	chr1:308197100-308203079	9.72373	2.92024	1.73542	0.000256649	0.0130251
ENSSSCT00000011413	ENSSSCG00000010428	DKK1	chr14:106114970-106117673	0.0721231	3.68444	-5.67484	0.000143323	0.00836283
ENSSSCT00000019462	ENSSSCG00000017885	SMTNL2	chr12:52581689-52601851	0.92913	4.04832	-2.12337	7.919e-05	0.00515833
ENSSSCT00000019461	ENSSSCG00000017884	TEKT1	chr12:52525590-52546786	0.0708536	2.77266	-5.29028	0.000418528	0.019089
ENSSSCT00000013490	ENSSSCG00000012336	GNL3L	chrX:53113292-53141323	1.55161	6.58384	-2.08517	0.000119186	0.00723422
ENSSSCT00000008346	ENSSSCG00000007606	TRRAP	chr3:5993864-6087744	1.44736	3.34239	-1.20745	0.000604894	0.0249377
ENSSSCT00000004323	ENSSSCG00000003908	TSPAN1	chr6:152704064-152709056	0.499867	15.9688	-4.99757	1.10578e-13	1.49372e-10
ENSSSCT00000035425	ENSSSCG00000010698	FGFR2	chr14:142500501-142570296	0.59309	3.91903	-2.72417	0.000961179	0.0350714
ENSSSCT00000019610	ENSSSCG00000018015	-	chr12:59181796-59247567	1.03183	3.60408	-1.80443	0.000488703	0.0212807
ENSSSCT00000010023	ENSSSCG00000009153	DKK2	chr8:123274616-123279223	9.09337	32.9863	-1.85898	0.000147102	0.00851356
ENSSSCT00000031273	ENSSSCG00000025630	-	GL896005.2:35384-66886	4.05198	13.6927	-1.75671	4.48282e-07	7.31645e-05
ENSSSCT00000002537	ENSSSCG00000002279	GPX2	chr7:95388197-95392767	0.253209	3.85501	-3.92834	1.18266e-06	0.000166119
ENSSSCT00000001647	ENSSSCG00000001476	HSD17B8	chr7:29753836-29756015	0	13.2408	#NAME?	3.04761e-06	0.000373532
ENSSSCT00000022727	ENSSSCG00000022306	ROPN1L	GL895898.2:158025-172358	1.85876	13.2721	-2.83599	6.49461e-07	0.000100634
ENSSSCT00000029028	ENSSSCG00000020990	-	chr13:43027222-43200076	0.530876	2.42359	-2.1907	9.29483e-07	0.000135039
ENSSSCT00000001995	ENSSSCG00000001780	FAH	chr7:54556146-54596334	33.5673	64.318	-0.938166	0.00104852	0.0372939
ENSSSCT00000001990	ENSSSCG00000001775	KIAA1024	chr7:54061673-54074837	0.0862743	1.44144	-4.06244	9.46867e-06	0.00096649
ENSSSCT00000028238	ENSSSCG00000029210	-	chr3:139887685-139890037	0.948367	6.77556	-2.83682	4.14071e-06	0.000485036
ENSSSCT00000033392	ENSSSCG00000012676	MBNL3	chrX:124498339-124539558	0	1.13197	#NAME?	0.000655206	0.0264452
ENSSSCT00000025606	ENSSSCG00000022305	WDR78	GL895308.2:371731-421138	0.200536	2.14001	-3.41568	6.09113e-05	0.00418528
ENSSSCT00000022954	ENSSSCG00000026730	-	chr9:102371093-102388393	0.881064	16.3705	-4.21571	1.20171e-12	1.10573e-09
ENSSSCT00000017054	ENSSSCG00000015657	-	chr9:73959147-73980647	0.529104	2.82006	-2.4141	5.06824e-06	0.000570368
ENSSSCT00000011042	ENSSSCG00000010081	MAPK1	chr14:53590166-53614842	10.8785	27.8016	-1.35369	0.000110847	0.00685258
ENSSSCT00000004241	ENSSSCG00000003832	TACSTD2	chr6:141453749-141454721	0.392909	14.1787	-5.17338	3.00555e-11	1.76685e-08
ENSSSCT00000018682	ENSSSCG00000017158	-	chr12:2412538-2453514	0.0975618	0.964376	-3.30521	0.000685113	0.0272881
ENSSSCT00000009792	ENSSSCG00000008939	JCHAIN	chr8:71347283-71358511	15.2524	42.9734	-1.49441	4.77766e-06	0.0005436
ENSSSCT00000008225	ENSSSCG00000007510	C20orf85	chr17:65584606-65594592	0	9.60979	#NAME?	1.53344e-05	0.0013928
ENSSSCT00000013960	ENSSSCG00000023084	-	chr13:73576874-73673698	0.152342	1.28997	-3.08195	7.01649e-05	0.0046941
ENSSSCT00000012962	ENSSSCG00000011850	MUC4	chr13:143786442-143842402	0.0598083	0.93456	-3.96587	1.63622e-05	0.0014735
ENSSSCT00000012968	ENSSSCG00000011855	IQCG	chr13:144134972-144178696	0.134976	1.90773	-3.82108	0.000602916	0.0249099
ENSSSCT00000017541	ENSSSCG00000016110	KIAA2012	chr15:117100042-117139151	0.135722	1.23122	-3.18137	0.000781719	0.0301392
ENSSSCT00000016482	ENSSSCG00000015116	MCAM	chr9:51548580-51557233	0	1.62351	#NAME?	0.000265613	0.0133837
ENSSSCT00000012488	ENSSSCG00000011408	ZMYND10	chr13:36004202-36008027	1.14147	8.37525	-2.87524	1.41703e-06	0.000194126
ENSSSCT00000028444	ENSSSCG00000024300	TMEM254	chr14:88542474-88551614	43.8804	87.4376	-0.994678	0.00029758	0.0147028
ENSSSCT00000024566	ENSSSCG00000029993	-	GL896259.2:38772-53642	0.331709	6.2556	-4.23716	1.48188e-08	3.98658e-06
ENSSSCT00000009036	ENSSSCG00000008250	CTNNA2	chr3:66285672-66567740	19.0392	36.5421	-0.940583	0.00097417	0.0354213
ENSSSCT00000005847	ENSSSCG00000005309	FAM166B	chr1:263990420-264050014	0.353603	11.2315	-4.98928	1.7904e-10	8.27174e-08
ENSSSCT00000010927	ENSSSCG00000009971	ZNRF3	chr14:49192214-49200066	2.32032	6.18837	-1.41523	0.00139308	0.0453798
ENSSSCT00000001016	ENSSSCG00000000931	MGAT4C	chr5:100820115-101008693	0.483573	3.93352	-3.02401	4.97847e-07	7.98177e-05
ENSSSCT00000035954	ENSSSCG00000004675	DUOX1	chr1:141171518-141201365	1.10562	4.08438	-1.88527	0.000105282	0.00654676
ENSSSCT00000011997	ENSSSCG00000010960	SLC28A3	chr10:34734229-34768182	0.0320103	4.115	-7.00621	2.00092e-06	0.000259258
ENSSSCT00000011995	ENSSSCG00000010959	-	chr10:34253162-34313564	0	4.60098	#NAME?	0.000262759	0.0132504
ENSSSCT00000011993	ENSSSCG00000010957	AGBL4	chr10:33554264-33666696	5.30027	11.0449	-1.05925	0.000828248	0.0315067
ENSSSCT00000002782	ENSSSCG00000002504	AK7	chr7:124867918-124925154	0.473917	5.16165	-3.44513	2.50495e-08	6.25262e-06
ENSSSCT00000003125	ENSSSCG00000002824	-	chr6:27276810-27380644	1.00583	8.89987	-3.1454	1.00249e-05	0.00100548
ENSSSCT00000003127	ENSSSCG00000002826	-	chr6:27276810-27380644	1.15617	12.3349	-3.41532	2.97514e-10	1.27628e-07
ENSSSCT00000003126	ENSSSCG00000002825	-	chr6:27276810-27380644	1.38053	10.4408	-2.91893	1.41285e-08	3.89323e-06
ENSSSCT00000006577	ENSSSCG00000005994	SNTB1	chr4:19423080-19550493	33.9326	67.484	-0.991876	0.000417937	0.019089
ENSSSCT00000030908	ENSSSCG00000029782	CELA1	chr5:17250141-17272282	0.555478	8.94536	-4.00934	1.02882e-07	2.03484e-05
ENSSSCT00000011605	ENSSSCG00000010609	CFAP43	chr14:124991354-125143165	0.0505253	2.16531	-5.42142	9.30996e-08	1.85874e-05
ENSSSCT00000005428	ENSSSCG00000004919	NEDD4L	chr1:179950609-180067851	2.37583	5.70872	-1.26474	0.0001967	0.0106946
ENSSSCT00000017088	ENSSSCG00000015688	CXCR4	chr15:18125326-18128996	44.8524	116.373	-1.37551	7.43221e-07	0.000111552
ENSSSCT00000024472	ENSSSCG00000025721	TMPRSS7	chr13:157329923-157369343	18.7282	55.9941	-1.58006	2.83519e-08	6.83624e-06
ENSSSCT00000027610	ENSSSCG00000021514	-	chr16:51547446-51598581	1.13341	4.61385	-2.0253	1.22964e-05	0.00117756
ENSSSCT00000012249	ENSSSCG00000011186	COL6A5	chr13:1791732-1881007	9.50104	18.1788	-0.9361	0.000692643	0.0274502
ENSSSCT00000017548	ENSSSCG00000016117	CARF	chr15:117869021-117914168	8.95934	16.8133	-0.908135	0.00131493	0.0434702
ENSSSCT00000019074	ENSSSCG00000017520	LRRC46	chr12:23961371-23967530	0.166064	2.796	-4.07355	0.000229536	0.0119456
ENSSSCT00000027053	ENSSSCG00000021571	KIF27	chr10:34991988-35042862	2.55277	7.51041	-1.55683	0.00013277	0.00787798
ENSSSCT00000027059	ENSSSCG00000015779	CDKN2AIP	chr15:51499659-51503186	0	2.63652	#NAME?	0.000297237	0.0146973
ENSSSCT00000029794	ENSSSCG00000030648	-	chr3:126064141-126073957	33.6354	173.382	-2.36591	3.78986e-12	3.00768e-09
ENSSSCT00000005324	ENSSSCG00000004822	-	chr1:155637549-155853766	3.84446	12.1009	-1.65426	8.91643e-06	0.00092048
ENSSSCT00000016754	ENSSSCG00000015379	DNAH11	chr9:99840593-100233792	0.526049	2.52903	-2.26532	4.739e-09	1.51699e-06
ENSSSCT00000004232	ENSSSCG00000003823	C1orf87	chr6:139665482-139746337	0.147011	2.24003	-3.92952	1.98757e-05	0.00171686
ENSSSCT00000007786	ENSSSCG00000007114	FOXA2	chr17:34053459-34056624	0.113713	1.2384	-3.44501	0.000237945	0.012292
ENSSSCT00000033656	ENSSSCG00000007718	CLDN4	chr3:10776891-10780656	0.981932	13.4877	-3.77988	9.65672e-13	9.01611e-10
ENSSSCT00000019569	ENSSSCG00000017983	PER1	chr12:55836901-55851908	0.627006	2.24204	-1.83826	0.00084264	0.0318749
ENSSSCT00000027712	ENSSSCG00000025655	CCDC180	chr1:267252680-267327315	0.163641	1.60617	-3.29501	1.81293e-07	3.33627e-05
ENSSSCT00000018994	ENSSSCG00000017448	KRT19	chr12:21536798-21540282	8.85874	72.1569	-3.02597	0	0
ENSSSCT00000012361	ENSSSCG00000011291	CCDC13	chr13:28893091-28927988	0.739897	4.19033	-2.50167	1.18349e-05	0.00115598
ENSSSCT00000010277	ENSSSCG00000009380	NEK5	chr11:16128791-16201490	0.216085	1.97616	-3.19303	0.000200424	0.0108295
ENSSSCT00000003574	ENSSSCG00000003218	MYBPC2	chr6:51131457-51159087	0.0867104	0.850685	-3.29435	7.08179e-05	0.00472782
ENSSSCT00000012666	ENSSSCG00000011574	-	JH118519.1:32347-88038	0.264532	2.80482	-3.40639	3.63293e-05	0.00278901
ENSSSCT00000001020	ENSSSCG00000000934	LRRIQ1	chr5:101863993-101950290	0.491433	2.98802	-2.60412	9.27511e-07	0.000135039
ENSSSCT00000008556	ENSSSCG00000007808	NFATC2IP	chr3:18796318-18810914	4.06915	8.59128	-1.07814	0.000961879	0.0350768
ENSSSCT00000023323	ENSSSCG00000021724	KIF19	chr12:6742502-6769436	0.0744547	2.62373	-5.13911	8.12845e-09	2.41153e-06
ENSSSCT00000009582	ENSSSCG00000008758	SLC34A2	chr8:19832501-19848016	0.587686	2.58478	-2.13692	5.31943e-05	0.00381179
ENSSSCT00000017701	ENSSSCG00000016256	SPHKAP	chr15:143190623-143341643	0.0554444	3.20467	-5.85299	2.10942e-14	4.05834e-11
ENSSSCT00000012552	ENSSSCG00000011470	ABHD6	chr13:43854444-44014598	18.9326	38.3093	-1.01683	0.00156722	0.0494538
ENSSSCT00000008959	ENSSSCG00000008180	EIF5B	chr3:57369146-57541127	0	0.792475	#NAME?	0.000149663	0.00859906
ENSSSCT00000029040	ENSSSCG00000026923	-	chr14:95320882-95323105	60.622	170.339	-1.4905	3.60646e-05	0.00277204
ENSSSCT00000003489	ENSSSCG00000003145	FUT2	chr6:49781886-49791227	0.748819	3.38979	-2.17851	0.00103179	0.0368808
ENSSSCT00000028217	ENSSSCG00000025783	ENTPD3	chr13:26979073-27014358	3.1903	7.48769	-1.23083	0.00100717	0.0363114
ENSSSCT00000012469	ENSSSCG00000011391	CDHR4	chr13:35501373-35508389	0.272195	3.07621	-3.49844	7.38773e-07	0.000111147
ENSSSCT00000015784	ENSSSCG00000014439	SLC26A2	chr2:157908465-158077825	11.0676	33.8468	-1.61267	2.13081e-06	0.000273502
ENSSSCT00000029507	ENSSSCG00000024697	TMEM125	chr6:155409065-155412295	0.227742	1.54847	-2.76536	0.00114937	0.0397235
ENSSSCT00000016787	ENSSSCG00000015412	CCDC146	chr9:113119526-113180465	0.146583	1.8527	-3.65984	1.48165e-05	0.00136295
ENSSSCT00000010335	ENSSSCG00000009428	FAM216B	chr11:24964615-24974127	0.0800374	3.00684	-5.23143	1.19612e-06	0.000167639
ENSSSCT00000012867	ENSSSCG00000011756	NLGN1	chr13:121518225-121525986	2.92826	8.21815	-1.48877	7.39494e-05	0.00486859
ENSSSCT00000000207	ENSSSCG00000000194	TUBA1C	chr5:15667322-15676220	137.446	308.196	-1.16498	6.53399e-05	0.00441316
ENSSSCT00000030065	ENSSSCG00000008555	CGREF1	chr3:119005133-119018767	0	5.21658	#NAME?	3.03498e-05	0.00241463
ENSSSCT00000007439	ENSSSCG00000006791	OVGP1	chr4:119112228-119124274	3.97229	66.1169	-4.05698	0	0
ENSSSCT00000023494	ENSSSCG00000021610	CHPF	chr15:134588464-134594046	0	7.10865	#NAME?	3.60989e-08	8.30394e-06
ENSSSCT00000029331	ENSSSCG00000027312	PTCH1	chr10:30847385-30915236	3.27053	6.59684	-1.01225	0.00107095	0.0378564
ENSSSCT00000017594	ENSSSCG00000016159	-	chr15:125183126-125279114	1.5371	5.00849	-1.70416	9.30604e-06	0.000951419
ENSSSCT00000015537	ENSSSCG00000014219	CDO1	chr2:124815021-124828122	72.9119	147.183	-1.01338	0.000243321	0.0125188
ENSSSCT00000005941	ENSSSCG00000005398	-	chr1:271586833-271591395	0.369068	7.53275	-4.35122	2.22342e-10	9.94105e-08
ENSSSCT00000007896	ENSSSCG00000007216	DEFB115	chr17:39835619-39837756	0	9.30503	#NAME?	0.00103286	0.0368808
ENSSSCT00000035889	ENSSSCG00000001362	MDC1	chr7:26951455-26968403	0.822285	3.11805	-1.92294	1.91357e-05	0.00167573
ENSSSCT00000010823	ENSSSCG00000009875	CFAP73	chr14:41102230-41123177	0.595561	3.4981	-2.55425	0.000190589	0.0104403
ENSSSCT00000004158	ENSSSCG00000003756	LPAR3	chr6:119296617-119374200	0.0786858	1.77218	-4.49328	7.03074e-07	0.000107044
ENSSSCT00000002650	ENSSSCG00000002383	FOS	chr7:104293656-104297121	17.3025	57.8112	-1.74037	2.20727e-09	7.575e-07
ENSSSCT00000031984	ENSSSCG00000030095	ZBTB16	chr9:46458176-46459448	10.7537	25.6574	-1.25454	0.000542963	0.0230121
ENSSSCT00000030835	ENSSSCG00000024357	DNAI2	chr12:6779151-6799278	0.447932	2.97455	-2.73132	5.70491e-05	0.00400662
ENSSSCT00000013217	ENSSSCG00000012083	RIPK4	chr13:215452666-215478472	0.249818	1.40705	-2.49373	0.000143612	0.0083639
ENSSSCT00000030173	ENSSSCG00000025598	-	chr15:79412980-79434415	20.9764	41.2266	-0.974805	0.000472862	0.0208338
ENSSSCT00000006612	ENSSSCG00000006025	PKHD1L1	chr4:30267984-30406481	1.35884	4.23045	-1.63844	4.40574e-07	7.20918e-05
ENSSSCT00000001888	ENSSSCG00000001691	-	chr7:44208372-44223870	0	2.89728	#NAME?	0.0010271	0.0367998
ENSSSCT00000024869	ENSSSCG00000028127	-	GL894711.1:14162-36161	0.443781	7.87788	-4.14989	3.15755e-08	7.39741e-06
ENSSSCT00000034049	ENSSSCG00000001428	CYP21A2	chr7:27681440-27725977	0.350041	2.94502	-3.07268	0.0005498	0.0231935
ENSSSCT00000016951	ENSSSCG00000015561	APOBEC4	chr9:137189415-137190516	0.167214	2.08874	-3.64287	0.00113719	0.0394564
ENSSSCT00000011466	ENSSSCG00000010478	FFAR4	chr14:114743574-114765158	0	1.65699	#NAME?	0.00150213	0.0479658
ENSSSCT00000012316	ENSSSCG00000011249	-	chr13:25072796-25168656	0.225954	1.21432	-2.42605	0.000115347	0.0070552
ENSSSCT00000003886	ENSSSCG00000003498	UBXN10	chr6:72647736-72654865	0.473741	8.38799	-4.14616	8.23567e-09	2.42072e-06
ENSSSCT00000023121	ENSSSCG00000007991	WDR90	chr3:41353995-41369701	0.377493	1.73197	-2.1979	3.02411e-05	0.00240901
ENSSSCT00000011361	ENSSSCG00000010379	FRMPD2	chr14:96480945-96624947	0	1.29447	#NAME?	2.67457e-05	0.00217878
ENSSSCT00000002046	ENSSSCG00000001826	CFAP100	chr7:58791314-58820798	0.320284	2.83901	-3.14797	2.45433e-05	0.00204342
ENSSSCT00000018005	ENSSSCG00000016535	CALD1	chr18:15075828-15194597	0.36333	2.64396	-2.86335	2.66061e-05	0.0021768
ENSSSCT00000013552	ENSSSCG00000012394	GJB1	chrX:64844645-64852108	0	1.36792	#NAME?	0.000672017	0.0268845
ENSSSCT00000032615	ENSSSCG00000001409	PRRC2A	chr7:27495907-27511694	3.22935	14.0594	-2.12222	0.00106301	0.0377036
ENSSSCT00000025632	ENSSSCG00000020756	FAM101A	chr14:30518902-30536047	24.1959	45.8123	-0.920976	0.00122487	0.0412989
ENSSSCT00000031953	ENSSSCG00000000191	KMT2D	chr5:15443376-15596598	1.41798	3.06927	-1.11406	0.000405478	0.0186682
ENSSSCT00000017060	ENSSSCG00000015662	C4BPA	chr9:74110908-74154259	11.4836	23.5061	-1.03346	0.00107254	0.0378608
ENSSSCT00000012837	ENSSSCG00000011727	PTX3	chr13:105238632-105486983	26.8465	59.1152	-1.13879	5.41126e-05	0.00385015
ENSSSCT00000009437	ENSSSCG00000008626	-	chr3:133958949-133972338	14.2067	30.7099	-1.11213	0.00144259	0.0467346
ENSSSCT00000009374	ENSSSCG00000008568	DRC1	chr3:119649280-119782862	0.248341	3.92086	-3.98077	1.30926e-07	2.51129e-05
ENSSSCT00000033158	ENSSSCG00000012823	DKC1	chrX:143254268-143264309	2.26499	8.28717	-1.87138	0.000494512	0.0214601
ENSSSCT00000019096	ENSSSCG00000017542	TTLL6	chr12:24942731-24980527	0	0.800664	#NAME?	0.000874319	0.0326439
ENSSSCT00000018328	ENSSSCG00000016833	CAPSL	chr16:22331823-22389296	2.19995	10.4561	-2.24881	8.06234e-05	0.0052285
ENSSSCT00000010119	ENSSSCG00000009239	-	chr8:144504871-144531061	0.295343	10.8676	-5.2015	1.38795e-06	0.000191149
ENSSSCT00000005113	ENSSSCG00000004630	SCG3	chr1:133087517-133181070	0.450778	1.61207	-1.83842	0.00101078	0.0363794
ENSSSCT00000007604	ENSSSCG00000006940	CYR61	chr4:142924365-142927632	14.501	35.048	-1.27318	1.57034e-05	0.00142224
ENSSSCT00000027772	ENSSSCG00000026478	PADI2	chr6:70039585-70099223	0.750563	2.53573	-1.75635	0.000167276	0.00934875
ENSSSCT00000028246	ENSSSCG00000008556	KHK	chr3:119019721-119030158	0.796778	4.84901	-2.60544	0.000410914	0.0188501
ENSSSCT00000009105	ENSSSCG00000008314	ATP6V1B1	chr3:75019945-75029803	0.0793949	3.13763	-5.30448	8.07776e-12	5.6357e-09
ENSSSCT00000005104	ENSSSCG00000004621	MYO5C	chr1:132514136-132624890	0.14499	0.885442	-2.61044	0.000132215	0.00785972
ENSSSCT00000022490	ENSSSCG00000010664	ENO4	chr14:138346193-138372170	0.213975	1.61779	-2.91851	0.00124784	0.0418733
ENSSSCT00000000271	ENSSSCG00000000252	KRT8	chr5:18663338-18671193	14.8393	55.1896	-1.89497	6.44971e-10	2.46678e-07
ENSSSCT00000000272	ENSSSCG00000000253	KRT18	chr5:18725319-18729778	0.431431	2.94935	-2.7732	0.000255893	0.0129971
ENSSSCT00000017657	ENSSSCG00000016216	-	chr15:134341042-134347416	0.448091	3.35178	-2.90307	6.16887e-05	0.00421588
ENSSSCT00000013365	ENSSSCG00000012219	CFAP47	chrX:35256762-35348268	0.103417	3.46568	-5.06659	8.59415e-11	4.26276e-08
ENSSSCT00000007007	ENSSSCG00000006394	CFAP45	chr4:98569801-98589936	0.322139	3.78319	-3.55385	2.75399e-05	0.00223877
ENSSSCT00000010251	ENSSSCG00000009354	CCNA1	chr11:12355645-12364743	0.325501	2.77455	-3.09152	7.40001e-05	0.00486859
ENSSSCT00000006255	ENSSSCG00000005688	PTGES	chr1:303779650-303792393	176.673	450.261	-1.34968	3.42928e-06	0.00041392
ENSSSCT00000035468	ENSSSCG00000012650	OCRL	chrX:121904423-121959210	1.71529	4.927	-1.52226	0.000435233	0.0196848
ENSSSCT00000026697	ENSSSCG00000024993	-	chr6:53560090-53561491	0.80741	7.43006	-3.202	2.94071e-07	5.11514e-05
ENSSSCT00000017761	ENSSSCG00000016308	-	chr15:148087402-148163653	9.58754	22.0768	-1.2033	0.0004116	0.0188679
ENSSSCT00000017765	ENSSSCG00000016312	-	chr15:148216755-148418220	9.25327	19.4778	-1.0738	0.000671878	0.0268845
ENSSSCT00000004085	ENSSSCG00000003687	EPB41L3	chr6:94749952-94835636	7.63025	34.6417	-2.18271	6.25811e-12	4.62001e-09
ENSSSCT00000000769	ENSSSCG00000000707	SCNN1A	chr5:66749071-66773949	0.207657	1.20636	-2.53839	0.00152682	0.0484922
ENSSSCT00000006649	ENSSSCG00000006060	GRHL2	chr4:38266584-38413078	0.304145	1.30914	-2.10578	0.000379607	0.0176822
ENSSSCT00000003075	ENSSSCG00000002777	HSD11B2	chr6:25351101-25399156	2.0935	8.33209	-1.99276	9.64607e-06	0.00097519
ENSSSCT00000002911	ENSSSCG00000002624	-	chr7:134263913-134267493	454.959	1467.12	-1.68918	1.42601e-08	3.89323e-06
ENSSSCT00000002910	ENSSSCG00000002623	-	chr7:134289616-134312033	369.781	928.918	-1.32888	2.48324e-05	0.00205756
ENSSSCT00000024303	ENSSSCG00000022913	SLPI	chr17:53167237-53169798	12.3865	85.1532	-2.78129	3.53171e-11	2.03841e-08
ENSSSCT00000000531	ENSSSCG00000000493	FRS2	chr5:36347220-36552888	47.5661	89.7678	-0.916263	0.000918999	0.0338436
ENSSSCT00000031629	ENSSSCG00000021786	-	chr13:120826339-121025641	6.59642	16.8908	-1.35649	0.00113229	0.039369
ENSSSCT00000030284	ENSSSCG00000030215	TMEM169	chr15:131216871-131232650	3.34319	8.98135	-1.42571	0.000523113	0.0224405
ENSSSCT00000030918	ENSSSCG00000026283	UBXN2A	chr3:121943290-121959714	0	7.81183	#NAME?	0.000161003	0.00907001
ENSSSCT00000011610	ENSSSCG00000010614	-	chr14:125263735-125380998	0.263423	2.83836	-3.4296	4.89892e-07	7.87411e-05
ENSSSCT00000029761	ENSSSCG00000021006	-	GL896422.1:1697-3396	7.99446	22.6281	-1.50104	0.000249918	0.0127651
ENSSSCT00000026800	ENSSSCG00000021902	GABRP	chr16:57477085-57495797	0.361444	5.34587	-3.88658	3.95006e-11	2.25933e-08
ENSSSCT00000023888	ENSSSCG00000025993	SGPP2	chr15:137861023-137905123	0.401141	2.11083	-2.39563	1.51318e-05	0.00138231
ENSSSCT00000017096	ENSSSCG00000015696	MAP3K19	chr15:19383307-19421648	0.0967782	1.56154	-4.01214	1.57754e-06	0.000209532
ENSSSCT00000012575	ENSSSCG00000011492	SNTN	chr13:49668180-49680601	0	8.50282	#NAME?	0.000874319	0.0326439
ENSSSCT00000018526	ENSSSCG00000017014	PANK3	chr16:59904336-59917314	110.503	223.862	-1.01852	0.000216688	0.0114454
ENSSSCT00000014526	ENSSSCG00000013300	EHF	chr2:28658520-28699570	0.921361	9.61982	-3.38417	1.06702e-08	3.05153e-06
ENSSSCT00000003627	ENSSSCG00000003266	TMC4	chr6:53248508-53263198	0.0678895	1.14626	-4.0776	0.000226255	0.0118408
ENSSSCT00000022765	ENSSSCG00000030305	SLC15A2	chr13:148222429-148259036	0.830915	4.63712	-2.48045	1.23734e-07	2.39504e-05
ENSSSCT00000011271	ENSSSCG00000010298	CFAP70	chr14:82200384-82322025	1.10957	3.50225	-1.65828	0.00051528	0.0221644
ENSSSCT00000004631	ENSSSCG00000004192	CTGF	chr1:35133812-35137139	63.0662	117.79	-0.901283	0.00118827	0.0405166
ENSSSCT00000001952	ENSSSCG00000001746	-	chr7:52030028-52373591	0.171461	1.10678	-2.69041	5.45911e-07	8.60033e-05
ENSSSCT00000001956	ENSSSCG00000001750	PAQR8	chr7:52635490-52682127	2.44019	8.21666	-1.75156	2.01449e-05	0.00173069
ENSSSCT00000026717	ENSSSCG00000015363	AGR2	chr9:94843482-94855042	3.6575	13.9128	-1.92749	0.00126595	0.0423911
ENSSSCT00000025991	ENSSSCG00000025266	-	chr3:24548184-24561515	0.309867	5.53105	-4.15783	0.000163443	0.00918303
ENSSSCT00000033339	ENSSSCG00000012118	TLR8	chrX:10500861-10512940	0.116142	1.44378	-3.63589	0.000546663	0.0230936
ENSSSCT00000024597	ENSSSCG00000021242	-	chr7:106493556-106507577	0.506225	3.07756	-2.60393	6.48959e-05	0.00438784
ENSSSCT00000017016	ENSSSCG00000015622	CD34	chr9:148445970-148470659	1.14834	4.45593	-1.95618	0.000477911	0.0209926
ENSSSCT00000016765	ENSSSCG00000015390	ABCB1	chr9:102544382-102626450	69.7217	155.202	-1.15447	0.000251614	0.0128311
ENSSSCT00000016764	ENSSSCG00000015389	-	chr9:102174740-102237020	9.94089	51.3349	-2.36849	8.88178e-16	2.56316e-12
ENSSSCT00000008194	ENSSSCG00000007485	BCAS1	chr17:61649515-61820053	0.243915	2.83522	-3.53901	1.86036e-07	3.41366e-05
ENSSSCT00000012849	ENSSSCG00000011738	WDR49	chr13:114946334-115027211	0.0998234	1.92111	-4.26642	2.86094e-06	0.000352696
ENSSSCT00000033666	ENSSSCG00000012784	SSR4	chrX:142093231-142106233	19.4754	57.6411	-1.56545	0.000578289	0.0241387
ENSSSCT00000026485	ENSSSCG00000027678	CCDC175	chr1:209647814-209714640	0	1.21994	#NAME?	0.000398115	0.0183959
ENSSSCT00000027572	ENSSSCG00000026732	-	chr7:27962236-27970347	5.90836	13.203	-1.16004	0.00147238	0.0475225
ENSSSCT00000019518	ENSSSCG00000017934	-	chr12:54826387-54828678	1.00572	7.26192	-2.85212	3.59071e-06	0.000429576
ENSSSCT00000011761	ENSSSCG00000010749	FAM196A	chr14:148219518-148260182	2.06332	5.41337	-1.39156	0.000466041	0.0206192
ENSSSCT00000012517	ENSSSCG00000011437	ALAS1	chr13:37657826-37667061	19.5981	44.9032	-1.19611	3.85146e-05	0.00292494
ENSSSCT00000010263	ENSSSCG00000009366	STOML3	chr11:14239520-14253534	1.54293	6.43946	-2.06127	3.86269e-05	0.00292997
ENSSSCT00000034478	ENSSSCG00000004678	DUOX2	chr1:141218795-141241329	1.2175	3.9712	-1.70566	6.55534e-05	0.00442287
ENSSSCT00000004289	ENSSSCG00000003877	FAF1	chr6:148923987-149306906	1.50524	6.06584	-2.01071	7.1555e-06	0.000763522
ENSSSCT00000005078	ENSSSCG00000004597	AQP9	chr1:125897935-125953413	5.36834	12.2603	-1.19145	7.19981e-05	0.00479149
ENSSSCT00000031026	ENSSSCG00000023904	CFAP57	chr6:155424280-155485848	0	0.875534	#NAME?	0.000155745	0.00886033
ENSSSCT00000016154	ENSSSCG00000014803	-	chr9:7424625-7434763	1.22121	6.02009	-2.30147	0.000771238	0.0298204
ENSSSCT00000010752	ENSSSCG00000009809	MORN3	chr14:32796947-32811643	0	1.90407	#NAME?	0.000739232	0.0289175
ENSSSCT00000030255	ENSSSCG00000028460	S1PR5	chr2:69608032-69657582	8.84544	25.695	-1.53848	1.53737e-06	0.000206098
ENSSSCT00000033502	ENSSSCG00000005122	TEK	chr1:218224161-218500245	0	2.37551	#NAME?	5.931e-06	0.000656017
ENSSSCT00000023640	ENSSSCG00000023393	ZBBX	chr13:114708593-114805501	0.305074	2.28931	-2.90768	3.05956e-05	0.00242811
ENSSSCT00000016344	ENSSSCG00000014982	MMP7	chr9:37133036-37143584	0.429744	3.11409	-2.85726	0.000288818	0.0143818
ENSSSCT00000006045	ENSSSCG00000005498	PAPPA	chr1:287904366-288136642	3.76651	8.29927	-1.13976	0.00051429	0.0221368
ENSSSCT00000004993	ENSSSCG00000004521	MRO	chr1:110207693-110280839	16.2625	69.4229	-2.09386	2.30084e-10	1.02153e-07
ENSSSCT00000010965	ENSSSCG00000010008	SEC14L3	chr14:50491450-50502421	0.0790766	2.06666	-4.70791	1.52935e-05	0.0013927
ENSSSCT00000022271	ENSSSCG00000006879	-	chr4:132800412-132846566	0	2.29255	#NAME?	5.7965e-05	0.00404411
ENSSSCT00000000010	ENSSSCG00000024718	-	chr5:1200224-1209799	0.316869	6.6029	-4.38114	1.10441e-08	3.14429e-06
ENSSSCT00000001057	ENSSSCG00000000967	ODF3B	chr5:110562327-110564234	0.23311	3.03277	-3.70155	0.000915736	0.033743
ENSSSCT00000026297	ENSSSCG00000021503	BCHE	chr13:113411282-113471750	16.3467	30.9275	-0.919892	0.00111203	0.038856
ENSSSCT00000033699	ENSSSCG00000012597	PLS3	chrX:109452787-109539959	0.880538	10.7763	-3.61334	2.56522e-09	8.6171e-07
ENSSSCT00000029964	ENSSSCG00000026175	FAM81B	chr2:105760789-105820910	0	1.9308	#NAME?	0.000439676	0.0197555
ENSSSCT00000027658	ENSSSCG00000026718	PLCH1	chr13:103430463-103527370	0.298215	1.26829	-2.08846	0.000351861	0.0167713
ENSSSCT00000011953	ENSSSCG00000010922	ELF3	chr10:28662045-28666264	0.413566	2.98152	-2.84986	8.6923e-05	0.00556316
ENSSSCT00000012284	ENSSSCG00000011217	NEK10	chr13:15305045-15475960	0.30794	1.97299	-2.67966	3.25691e-05	0.00255642
ENSSSCT00000006535	ENSSSCG00000005952	LRRC6	chr4:8570713-8644068	0.920186	3.63252	-1.98097	0.00158278	0.0497718
ENSSSCT00000025006	ENSSSCG00000022830	KANSL1L	chr15:124563201-124740175	9.35504	21.6605	-1.21125	9.94335e-05	0.00623192
ENSSSCT00000013422	ENSSSCG00000012274	NDUFB11	chrX:46878470-46881284	116.347	231.935	-0.995283	0.000327324	0.0158154
ENSSSCT00000018729	ENSSSCG00000017204	ITGB4	chr12:5597668-5632075	0.0978361	1.42482	-3.86427	1.71802e-05	0.00153196
ENSSSCT00000014166	ENSSSCG00000012960	CST6	chr2:5395319-5396971	6.76054	36.0228	-2.4137	1.5387e-06	0.000206098
ENSSSCT00000017048	ENSSSCG00000015651	PIGR	chr9:73889671-73899096	0.413844	2.48097	-2.58375	1.04758e-05	0.00104411
ENSSSCT00000014553	ENSSSCG00000013326	DCDC1	chr2:32221407-32261136	0.295642	1.88536	-2.67292	0.000452575	0.0201639
ENSSSCT00000004899	ENSSSCG00000004434	FRK	chr1:91721729-91829805	0.304725	1.32889	-2.12464	0.00061333	0.025177
ENSSSCT00000016185	ENSSSCG00000014833	UCP2	chr9:9147992-9155011	2.85624	8.7698	-1.61842	0.000427662	0.0194358
ENSSSCT00000018101	ENSSSCG00000016626	CFTR	chr18:30396464-30566740	0.223663	2.47623	-3.46875	1.95175e-08	5.12045e-06
ENSSSCT00000014905	ENSSSCG00000013645	ATG4D	chr2:69705971-69722769	4.77081	10.8176	-1.18108	0.00015903	0.00900222
ENSSSCT00000036290	ENSSSCG00000030839	JUN	chr6:141230120-141233597	31.1058	58.2155	-0.904219	0.000997192	0.0360745
ENSSSCT00000019171	ENSSSCG00000017609	ANKFN1	chr12:33480571-33634826	0	1.38481	#NAME?	0.000232629	0.0120566
ENSSSCT00000010997	ENSSSCG00000010039	-	chr14:52153412-52186822	3.40551	8.75897	-1.36289	0.00116331	0.0400747
ENSSSCT00000014281	ENSSSCG00000013065	ASRGL1	chr2:8649632-8675487	12.5767	23.8349	-0.922331	0.00149253	0.0479658
ENSSSCT00000024443	ENSSSCG00000030406	-	chr1:84598998-84622404	0.201325	1.64324	-3.02894	0.000310334	0.0151677
ENSSSCT00000011739	ENSSSCG00000010728	CPXM2	chr14:144881644-145010683	28.6782	77.0149	-1.42518	3.23268e-07	5.51719e-05
ENSSSCT00000011738	ENSSSCG00000010727	GPR26	chr14:144808491-144830835	0.107651	3.11037	-4.85265	4.01201e-11	2.26685e-08
ENSSSCT00000012127	ENSSSCG00000011080	SPAG6	chr10:58151625-58226625	0.129112	5.10734	-5.30588	2.31015e-09	7.84325e-07
ENSSSCT00000012124	ENSSSCG00000011078	ARMC3	chr10:57615453-57702468	0.0915037	2.02713	-4.46947	8.15071e-07	0.000120625
ENSSSCT00000034535	ENSSSCG00000011848	TFRC	chr13:143408459-143437991	3.95182	10.3661	-1.39129	0.000159701	0.00902069
ENSSSCT00000016374	ENSSSCG00000015010	EXPH5	chr9:41073545-41217329	0.642599	2.22386	-1.79108	0.000109637	0.00678432
ENSSSCT00000026329	ENSSSCG00000025277	-	chr10:72009226-72022986	155.738	431.219	-1.4693	2.1137e-06	0.000272758
ENSSSCT00000027498	ENSSSCG00000021105	DPEP2	chr6:26020413-26025817	1.53337	6.50779	-2.08546	7.31767e-05	0.0048496
ENSSSCT00000027143	ENSSSCG00000010749	FAM196A	chr14:148219518-148260182	0.594234	3.06481	-2.3667	3.83971e-05	0.00292302
ENSSSCT00000028675	ENSSSCG00000028471	DTHD1	chr8:29366903-29438494	0.122469	3.03557	-4.63148	4.5945e-09	1.48071e-06
ENSSSCT00000014581	ENSSSCG00000013351	-	chr2:42202740-42245884	4.24688	8.69164	-1.03322	0.00120611	0.0409273
ENSSSCT00000006336	ENSSSCG00000005760	C9orf116	chr1:308630223-308634807	1.64749	6.55862	-1.99312	0.000992703	0.0359326
ENSSSCT00000010414	ENSSSCG00000009497	-	chr11:71298809-71453998	0.265957	3.50997	-3.7222	9.43245e-13	9.01611e-10
ENSSSCT00000035960	ENSSSCG00000002981	DMBT1	chr6:43728924-43753137	0.553894	11.386	-4.3615	2.75335e-14	4.72453e-11
ENSSSCT00000033491	ENSSSCG00000015732	TFCP2L1	chr15:35005973-35065807	0	1.03348	#NAME?	0.000413735	0.0189521
ENSSSCT00000029919	ENSSSCG00000028058	CCDC69	chr16:78027655-78054985	0.277007	5.02428	-4.18092	6.65057e-11	3.39196e-08
ENSSSCT00000010707	ENSSSCG00000009765	DNAH10	chr14:30793246-30941747	1.45409	4.04119	-1.47466	3.4673e-06	0.000416923
ENSSSCT00000003117	ENSSSCG00000002817	DRC7	chr6:17574598-17580003	0.147176	2.07943	-3.82057	0.000603921	0.0249138
ENSSSCT00000018717	ENSSSCG00000017192	EVPL	chr12:5364941-5381504	0.268119	1.05008	-1.96956	0.000618955	0.0253364
ENSSSCT00000018712	ENSSSCG00000017187	FOXJ1	chr12:5211494-5216372	0.580926	16.9323	-4.86528	0	0
ENSSSCT00000004343	ENSSSCG00000003927	TCTEX1D4	chr6:153998344-154112791	0.464719	11.0984	-4.57786	2.64786e-08	6.51391e-06
ENSSSCT00000000048	ENSSSCG00000020945	-	chr5:3782776-3786298	9.96273	22.624	-1.18324	0.00135409	0.0444519
ENSSSCT00000030564	ENSSSCG00000029879	LTF	chr13:32577738-32609442	1.48466	4.9268	-1.73052	0.000404113	0.0186323
ENSSSCT00000015577	ENSSSCG00000014256	FBN2	chr2:136503754-136602304	5.25121	11.0122	-1.06838	0.000224773	0.0117842
ENSSSCT00000028251	ENSSSCG00000028982	-	chr10:71747463-71761223	140.135	398.547	-1.50793	7.78503e-07	0.000116297
ENSSSCT00000007406	ENSSSCG00000006760	HIPK1	chr4:116708891-116821627	0	0.837737	#NAME?	5.38246e-05	0.00383833
ENSSSCT00000004226	ENSSSCG00000003819	ANGPTL3	chr6:138042657-138172957	0.215548	1.58308	-2.87665	0.00066599	0.0267107
ENSSSCT00000036078	ENSSSCG00000003048	CXCL17	chr6:45981952-46078610	0.461078	4.46345	-3.27508	0.00032834	0.0158164
ENSSSCT00000032515	ENSSSCG00000022199	TUBG1	chr12:20362155-20364503	8.84532	24.6151	-1.47656	2.82206e-05	0.00227662
ENSSSCT00000017627	ENSSSCG00000016187	-	chr15:133462314-133468029	0	2.1564	#NAME?	0.00103286	0.0368808
ENSSSCT00000005166	ENSSSCG00000004679	SORD	chr1:141257111-141301015	63.2051	199.551	-1.65865	6.15537e-08	1.28976e-05
ENSSSCT00000009670	ENSSSCG00000008834	-	chr8:41338762-41379906	0.208021	7.06675	-5.08625	3.95451e-10	1.60941e-07
ENSSSCT00000012113	ENSSSCG00000011069	ARMC4	chr10:53394012-53520552	1.59872	7.68697	-2.2655	4.61159e-06	0.000528082
ENSSSCT00000001180	ENSSSCG00000001085	DCDC2	chr7:20197881-20368697	0.690147	4.92471	-2.83506	7.81631e-08	1.59566e-05
ENSSSCT00000007079	ENSSSCG00000006462	LRRC71	chr4:101734569-101747874	0.200489	3.00014	-3.90343	1.41874e-06	0.000194126
ENSSSCT00000025398	ENSSSCG00000028184	DNAH1	chr13:37680290-37757842	0.124898	1.26981	-3.3458	4.09035e-10	1.64362e-07
ENSSSCT00000009731	ENSSSCG00000008888	NPY1R	chr8:55280139-55290347	15.2219	45.6968	-1.58594	2.14686e-08	5.54072e-06
ENSSSCT00000022428	ENSSSCG00000013714	-	chr2:67197695-67239468	0.536032	2.16834	-2.0162	0.000309876	0.0151569
ENSSSCT00000008762	ENSSSCG00000007995	FAM195A	chr3:41348588-41353426	250.371	646.694	-1.36902	2.1422e-06	0.000274206
ENSSSCT00000002001	ENSSSCG00000001786	CFAP161	chr7:55527118-55540522	0.292244	3.12772	-3.41987	8.84136e-06	0.000914217
ENSSSCT00000004878	ENSSSCG00000004415	-	chr1:84644861-84709541	0.169323	1.53754	-3.18278	4.21959e-05	0.00315303
ENSSSCT00000003065	ENSSSCG00000002767	TSNAXIP1	chr6:25682842-25704076	0.110815	1.04598	-3.23864	0.00061387	0.025177
ENSSSCT00000033190	ENSSSCG00000030800	CXorf59	chrX:35406885-35533740	0.250055	1.81511	-2.85973	0.000285331	0.0142304
ENSSSCT00000006200	ENSSSCG00000005638	-	chr1:302600678-302605199	16.3173	46.626	-1.51473	1.31051e-05	0.00123264
ENSSSCT00000012199	ENSSSCG00000011147	-	chr10:71833305-71847875	16.8777	51.26	-1.60272	6.58539e-07	0.000101727
ENSSSCT00000011625	ENSSSCG00000010629	ADRA2A	chr14:132403893-132405246	0.129547	2.32431	-4.16525	0.00015909	0.00900222
ENSSSCT00000026594	ENSSSCG00000021968	SLC19A3	chr15:142948414-142973548	0.0828545	1.56497	-4.23941	3.37119e-06	0.000410025
ENSSSCT00000017718	ENSSSCG00000016270	C2orf72	chr15:145450296-145460228	6.21401	18.4995	-1.57389	4.3371e-07	7.11703e-05
ENSSSCT00000015660	ENSSSCG00000014336	EGR1	chr2:146156064-146160020	8.8642	27.508	-1.63379	5.63684e-08	1.20093e-05
ENSSSCT00000015663	ENSSSCG00000014336	EGR1	chr2:146156064-146160020	0	1.63692	#NAME?	0.000244109	0.01254
ENSSSCT00000008105	ENSSSCG00000007405	WFDC2	chr17:53365362-53366692	0.750595	21.2801	-4.82533	3.64815e-09	1.1939e-06
ENSSSCT00000013087	ENSSSCG00000011961	TFG	chr13:167720862-167931302	12.9268	43.6163	-1.7545	4.61524e-06	0.000528082
ENSSSCT00000002252	ENSSSCG00000002013	DHRS4	chr7:80512358-80525770	518.206	1411.03	-1.44515	7.23936e-05	0.00480774
ENSSSCT00000018048	ENSSSCG00000016578	FLNC	chr18:20855083-20884021	2.77614	6.11303	-1.13881	0.000163203	0.0091777
ENSSSCT00000018049	ENSSSCG00000016579	CCDC136	chr18:20818949-20848924	0.184286	1.39343	-2.91861	0.000496509	0.0214795
ENSSSCT00000012862	ENSSSCG00000011751	TMEM212	chr13:119400407-119420051	0.443579	10.7564	-4.59986	2.47378e-05	0.00205304
ENSSSCT00000008600	ENSSSCG00000007850	ANKS4B	chr3:25642518-25654502	0	1.38025	#NAME?	0.000113359	0.00697388
ENSSSCT00000019051	ENSSSCG00000017498	PPP1R1B	chr12:23071449-23079034	5.45195	18.6917	-1.77755	1.9842e-05	0.00171628
ENSSSCT00000013724	ENSSSCG00000022993	TBC1D8B	chrX:101625118-101698817	0	3.39825	#NAME?	0.000234659	0.012142
ENSSSCT00000025341	ENSSSCG00000023732	KLHDC7A	chr6:71268366-71270757	0.201591	2.04958	-3.34583	1.46311e-05	0.00134912
ENSSSCT00000005445	ENSSSCG00000004934	DPP8	chr1:181020972-181091802	1.82443	7.57358	-2.05353	2.34024e-08	5.9195e-06
ENSSSCT00000025186	ENSSSCG00000011918	USF3	chr13:155815449-155865635	0.328281	1.61763	-2.30088	0.000102209	0.00638067
ENSSSCT00000016813	ENSSSCG00000015433	-	chr9:116718487-116747666	0.498677	9.3663	-4.2313	3.58291e-12	2.91635e-09
ENSSSCT00000000188	ENSSSCG00000000179	CCDC65	chr5:15361358-15368748	0.769172	3.28226	-2.09331	0.00151593	0.0482429
ENSSSCT00000017800	ENSSSCG00000016345	-	chr15:153160291-153194892	4.21146	10.2294	-1.28033	0.000723204	0.0284659
ENSSSCT00000015425	ENSSSCG00000014121	ZFYVE16	chr2:90895540-90953249	7.46118	15.4328	-1.04853	0.000397521	0.0183959
ENSSSCT00000027549	ENSSSCG00000028691	SULT1C3	chr3:50008177-50034005	91.1161	313.544	-1.78289	6.56279e-09	1.97472e-06
ENSSSCT00000027547	ENSSSCG00000025931	-	GL895203.1:2792-4629	0.33416	6.86488	-4.36062	7.04126e-05	0.00470571
ENSSSCT00000011289	ENSSSCG00000010313	-	chr14:82826611-82938103	1.72985	4.30256	-1.31455	0.00144589	0.046812
ENSSSCT00000029156	ENSSSCG00000025529	FAM3D	chr13:44467147-44516711	1.26698	7.76269	-2.61516	2.67676e-05	0.00217878
ENSSSCT00000031995	ENSSSCG00000027407	MYH14	chr6:50894418-51049578	0.200096	1.03027	-2.36426	0.000157928	0.0089604
ENSSSCT00000031991	ENSSSCG00000023834	-	chr1:50284979-50290956	0.293458	6.2994	-4.42399	2.62703e-08	6.48978e-06
ENSSSCT00000008275	ENSSSCG00000007543	-	chr3:271009-299599	2.04956	5.52096	-1.42961	0.00144277	0.0467346
ENSSSCT00000029834	ENSSSCG00000025652	CDH1	GL895865.1:35226-45106	1.68947	11.7119	-2.79334	4.62472e-07	7.50943e-05
ENSSSCT00000014779	ENSSSCG00000013532	-	chr2:73688679-73690469	0.374577	6.65361	-4.1508	3.13615e-08	7.37447e-06
ENSSSCT00000031033	ENSSSCG00000024420	GMNC	chr13:137621888-137631288	0.0538609	0.910745	-4.07974	0.000224026	0.0117644
