# Supplementary material for: Systematic Analysis of Long Non-Coding RNAs and mRNAs in the Ovaries of Duroc Pigs During Different Follicular Stages Using RNA Sequencing
Source: Int J Mol Sci. 2018 Jun 11;19(6):1722. doi: 10.3390/ijms19061722 (PMC6032137; doi:10.3390/ijms19061722)
Supplement: Supplementary file 1 [file ijms-19-01722-s001.zip › Supplementary Table S3.xlsx]

## Sheet: Table S3
Systematic analysis of long non-coding RNAs and mRNAs in the ovaries of Duroc pigs during different follicular stages using RNA sequencing Yi Liu, Mengxun Li, Xinwen Bo, Li Tao, Lipeng Ma, Tenjiao Zhai, Tao Huang
Supplementary Table S3. The information of differentially expressed 53 lncRNA transcripts (37 up-regulated and 16 down-regulated) and 603 mRNA transcripts (432 up-regulated and 171 down-regulated) in the DOVADAY4 and DOVADAY2 comparison group.
transcript_id	gene_id	gene_name	gene_location	DOVADAY4_FPKM	DOVADAY2_FPKM	log2(foldchange)	pvalue	qvalue
ALDBSSCT0000001454	ALDBSSCG0000000877	-	chr10:19937229-19951293	1.29649	0	inf	1.17882e-08	3.32633e-06
ALDBSSCT0000002532	ALDBSSCG0000001531	-	chr12:61928787-61940041	0.665503	0	inf	0.00052975	0.0225727
ALDBSSCT0000011044	ALDBSSCG0000006703	-	chr9:3037294-3043877	1.23272	0.0308256	5.32158	0.000356333	0.0169082
ALDBSSCT0000005854	ALDBSSCG0000003560	-	chr2:29432628-29480226	0.594984	0	inf	0.000207709	0.011091
ALDBSSCT0000011300	ALDBSSCG0000006863	-	chr9:117706826-117729351	769.063	210.075	1.8722	9.65903e-05	0.00608375
LNC_000154	XLOC_011021	-	chr1:39601899-39602385	231.498	55.8136	2.05231	0.000527017	0.0225433
ALDBSSCT0000011852	ALDBSSCG0000007201	-	GL896302.1:108888-110179	21.1824	7.71818	1.45653	0.000958728	0.0350021
ALDBSSCT0000001721	ALDBSSCG0000001039	-	chr11:19591307-19596470	245.978	96.0992	1.35594	0.000575514	0.0240703
LNC_000024	XLOC_000711	-	GL892881.1:9154-20279	72.7765	5.59427	3.70145	0.00117319	0.0402261
ALDBSSCT0000011038	ALDBSSCG0000006699	-	chr9:1323892-1331891	0.659368	0	inf	0.000630077	0.0256758
LNC_000410	XLOC_034614	-	chr18:58197138-58201582	1.0985	0.143052	2.94091	0.00055634	0.0234383
ALDBSSCT0000007222	ALDBSSCG0000004391	-	chr3:83577179-83582761	3.0753	0	inf	0.00128442	0.0427391
LNC_000300	XLOC_023710	-	chr13:159057050-159067397	0.76727	0	inf	0.000739232	0.0289175
ALDBSSCT0000010786	ALDBSSCG0000006524	-	chr8:18156196-18170577	2.67381	0	inf	0.000359307	0.0170112
LNC_000592	XLOC_052149	-	chr6:62350602-62363640	1.23854	0.0732015	4.08062	0.00128903	0.0428029
LNC_000597	XLOC_053452	-	chr7:13885670-13892094	0.663509	0.0944324	2.81276	0.00100904	0.0363579
LNC_000076	XLOC_003450	-	GL894621.1:30737-31130	941.638	277.853	1.76085	6.00474e-05	0.00414441
LNC_000071	XLOC_003211	-	GL894475.1:13317-13875	240.838	92.9938	1.37285	0.00148085	0.0477121
ALDBSSCT0000005771	ALDBSSCG0000003506	-	chr2:1480230-1482657	491.95	194.403	1.33946	0.000491692	0.0213815
ALDBSSCT0000011934	ALDBSSCG0000007263	-	chrX:55266277-55275391	1.6915	0.391714	2.11043	0.00145199	0.0469375
ALDBSSCT0000011315	ALDBSSCG0000006872	-	chr9:127640359-127641469	477.058	80.6357	2.56467	0.000212042	0.0112561
ALDBSSCT0000001173	ALDBSSCG0000000726	-	chr10:29076621-29083257	34.5608	11.3894	1.60145	1.66128e-08	4.43163e-06
LNC_000200	XLOC_014295	-	chr10:13669070-13737338	0.629904	0	inf	0.000438063	0.0197389
ALDBSSCT0000008750	ALDBSSCG0000005341	-	chr6:16387918-16400028	2.00591	0	inf	0.000100134	0.00626962
LNC_000393	XLOC_032850	-	chr17:41941050-41966927	191.3	12.7997	3.90166	3.90107e-05	0.00295203
ALDBSSCT0000008522	ALDBSSCG0000005185	-	chr5:20091140-20097043	2.22648	0	inf	0.000874319	0.0326439
LNC_000454	XLOC_037469	-	chr2:155275903-155281259	25.8855	9.82062	1.39826	1.33245e-06	0.000184707
ALDBSSCT0000000482	ALDBSSCG0000000287	-	chr1:264741508-264753018	775.814	161.189	2.26696	3.15086e-05	0.00249432
LNC_000642	XLOC_058577	-	chr8:38812516-38844825	1.45856	0	inf	0.00116506	0.0400783
ALDBSSCT0000011135	ALDBSSCG0000006756	-	chr9:32511559-32566579	4.91273	0	inf	0.00136153	0.0445907
LNC_000557	XLOC_048705	-	chr5:90633910-90650280	2.56772	0.484061	2.40723	8.866e-11	4.36351e-08
ALDBSSCT0000005933	ALDBSSCG0000003624	-	chr2:77839216-77840164	64.3996	31.0534	1.0523	0.00133345	0.0438914
ALDBSSCT0000002998	ALDBSSCG0000001798	-	chr13:207620782-207626020	0.938716	0.117682	2.99579	0.000425605	0.0193562
LNC_000713	XLOC_065436	-	chrX:143944820-144019483	5.49607	1.53435	1.84077	0.00020425	0.010968
LNC_000585	XLOC_051837	-	chr6:48257518-48260877	1.45317	0.0579532	4.64817	1.66148e-05	0.00149413
LNC_000127	XLOC_007130	-	JH118868.1:102905-106741	1.26458	0.0207526	5.92923	6.25399e-05	0.00426487
LNC_000033	XLOC_001067	-	GL893120.1:540-14387	10.2703	0.832235	3.62535	0.00110448	0.0386349
ENSSSCT00000034907	ENSSSCG00000030790	TMP-CH242-74M17.6	chr7:24626855-24627344	0	212.258	#NAME?	4.75487e-09	1.51699e-06
LNC_000688	XLOC_062673	-	chr9:52590728-52594910	0	0.756179	#NAME?	0.00150213	0.0479658
LNC_000029	XLOC_000869	-	GL893000.2:190933-202497	0.474142	4.13546	-3.12466	0.000394042	0.0182875
ALDBSSCT0000005722	ALDBSSCG0000003473	-	chr18:47381684-47386100	0.838408	3.01832	-1.84802	0.000415079	0.019
ALDBSSCT0000009954	ALDBSSCG0000006058	-	chr7:124299186-124352196	1.3361	4.69569	-1.81331	3.39247e-05	0.00264926
LNC_000599	XLOC_053949	-	chr7:36989657-37012199	0.201714	1.01825	-2.33571	0.000218798	0.0115317
LNC_000667	XLOC_061238	-	chr9:100825839-100832057	0.230427	1.17469	-2.34989	0.00120489	0.0409078
LNC_000164	XLOC_011590	-	chr1:119819702-119822808	0.758578	4.77233	-2.65333	0.000949189	0.034814
ALDBSSCT0000006321	ALDBSSCG0000003864	-	chr2:70615641-70617401	0.752861	5.28248	-2.81076	0.000233503	0.0120921
ALDBSSCT0000007754	ALDBSSCG0000004706	-	chr4:138625804-138629165	0.998523	3.63178	-1.86281	0.00109928	0.0384954
LNC_000207	XLOC_015100	-	chr10:72937837-72941769	0.421887	2.42643	-2.52391	0.00159299	0.0498952
LNC_000199	XLOC_014295	-	chr10:13669070-13737338	0	1.00367	#NAME?	0.000260122	0.0131383
ALDBSSCT0000010881	ALDBSSCG0000006593	-	chr8:73032658-73034667	0.530414	3.15161	-2.5709	0.000546704	0.0230936
ALDBSSCT0000011472	ALDBSSCG0000006981	-	chr9:30909859-30917948	0.338747	1.34736	-1.99186	0.00118761	0.0405159
ALDBSSCT0000008243	ALDBSSCG0000005004	-	chr5:3509496-3518073	0.759899	2.52573	-1.73282	0.000613514	0.025177
LNC_000126	XLOC_007107	-	JH118856.1:52366-56511	3.62399	11.1271	-1.61843	1.90563e-05	0.00167109
transcript_id	gene_id	gene_name	gene_location	DOVADAY4_FPKM	DOVADAY2_FPKM	log2(foldchange)	pvalue	qvalue
ENSSSCT00000014891	ENSSSCG00000013636	AP1M2	chr2:69745811-69752189	3.23518	0.479437	2.75443	0.00133798	0.0439913
ENSSSCT00000011413	ENSSSCG00000010428	DKK1	chr14:106114970-106117673	4.59394	0.0721231	5.99313	5.17264e-05	0.00372342
ENSSSCT00000007823	ENSSSCG00000007150	TIGD6	chr17:36263348-36263885	116.069	54.8142	1.08236	0.000956156	0.0349515
ENSSSCT00000006062	ENSSSCG00000005512	C5	chr1:293077417-293163333	2.49329	0.465272	2.42191	9.22044e-07	0.000134574
ENSSSCT00000024346	ENSSSCG00000028826	-	chr6:81586445-81603572	177.556	70.4919	1.33274	0.00128647	0.0427529
ENSSSCT00000019462	ENSSSCG00000017885	SMTNL2	chr12:52581689-52601851	4.94447	0.92913	2.41186	2.87999e-06	0.000353671
ENSSSCT00000008342	ENSSSCG00000007602	BAIAP2L1	chr3:5427989-5589075	4.99361	1.61755	1.62627	0.00113945	0.0394667
ENSSSCT00000005615	ENSSSCG00000005094	TMEM30B	chr1:211526243-211527305	3.29505	0.612824	2.42676	0.00131803	0.0435382
ENSSSCT00000004323	ENSSSCG00000003908	TSPAN1	chr6:152704064-152709056	16.3088	0.499867	5.02797	4.39648e-14	7.15714e-11
ENSSSCT00000010974	ENSSSCG00000010017	SMTN	chr14:50990975-51014415	66.2746	28.3125	1.22702	1.29139e-05	0.00121863
ENSSSCT00000019610	ENSSSCG00000018015	-	chr12:59181796-59247567	4.73467	1.03183	2.19806	7.61107e-06	0.000804025
ENSSSCT00000002537	ENSSSCG00000002279	GPX2	chr7:95388197-95392767	1.80849	0.253209	2.83639	0.00062358	0.0254929
ENSSSCT00000001647	ENSSSCG00000001476	HSD17B8	chr7:29753836-29756015	9.45657	0	inf	3.7903e-06	0.000449799
ENSSSCT00000022727	ENSSSCG00000022306	ROPN1L	GL895898.2:158025-172358	13.0551	1.85876	2.81221	4.78614e-07	7.71237e-05
ENSSSCT00000026116	ENSSSCG00000025507	RPL27	chr12:19987052-19989521	796.936	303.497	1.39278	2.13239e-06	0.000273502
ENSSSCT00000026111	ENSSSCG00000021865	INHBA	chr18:57997857-58009109	213.631	77.8208	1.45689	7.24503e-07	0.000109259
ENSSSCT00000027640	ENSSSCG00000021536	-	chr3:10715625-10716249	14.042	0.481704	4.86546	0.00122029	0.0411662
ENSSSCT00000028373	ENSSSCG00000030010	RPL36	chr2:73808881-73810492	3428.37	1313.8	1.38378	7.5639e-06	0.00080171
ENSSSCT00000029028	ENSSSCG00000020990	-	chr13:43027222-43200076	2.70802	0.530876	2.35079	5.63324e-08	1.20093e-05
ENSSSCT00000009694	ENSSSCG00000008854	CPE	chr8:45395480-45618352	95.7364	32.384	1.56379	1.03752e-07	2.04569e-05
ENSSSCT00000017860	ENSSSCG00000016403	VIPR2	chr18:663351-732192	1.93356	0.058123	5.056	0.000721562	0.0284365
ENSSSCT00000023570	ENSSSCG00000024122	CHST8	GL893209.1:1189-65002	38.3241	17.5605	1.12592	0.000566491	0.023787
ENSSSCT00000028238	ENSSSCG00000029210	-	chr3:139887685-139890037	6.11165	0.948367	2.68804	9.68332e-06	0.000977399
ENSSSCT00000029720	ENSSSCG00000028847	DSC3	JH118612.1:153589-188200	1.82019	0.354463	2.36038	0.000396965	0.0183959
ENSSSCT00000033392	ENSSSCG00000012676	MBNL3	chrX:124498339-124539558	0.640325	0	inf	0.0015098	0.0480731
ENSSSCT00000003817	ENSSSCG00000003439	DHRS3	chr6:66685214-66695554	47.6074	19.2092	1.30939	3.59008e-05	0.00276951
ENSSSCT00000025606	ENSSSCG00000022305	WDR78	GL895308.2:371731-421138	1.83028	0.200536	3.19013	0.00015969	0.00902069
ENSSSCT00000017054	ENSSSCG00000015657	-	chr9:73959147-73980647	3.37174	0.529104	2.67187	1.50018e-07	2.83467e-05
ENSSSCT00000008845	ENSSSCG00000008072	ASPN	chr3:43260711-43602320	19.6909	7.38552	1.41476	9.29779e-06	0.000951419
ENSSSCT00000011042	ENSSSCG00000010081	MAPK1	chr14:53590166-53614842	42.2743	10.8785	1.9583	6.255e-09	1.91013e-06
ENSSSCT00000004241	ENSSSCG00000003832	TACSTD2	chr6:141453749-141454721	11.2937	0.392909	4.84518	4.31428e-10	1.7072e-07
ENSSSCT00000027904	ENSSSCG00000021654	ZNF641	chr5:81900483-81911075	0.776754	0	inf	0.000229119	0.011943
ENSSSCT00000006902	ENSSSCG00000006297	DPT	chr4:89969323-90001121	41.4267	6.70984	2.62621	1.93179e-14	3.95636e-11
ENSSSCT00000012271	ENSSSCG00000011205	EFHB	chr13:7728154-7798134	0.766008	0	inf	0.000290333	0.0144244
ENSSSCT00000018682	ENSSSCG00000017158	-	chr12:2412538-2453514	1.40677	0.0975618	3.84993	4.89511e-05	0.00357636
ENSSSCT00000015551	ENSSSCG00000014233	-	chr2:130957444-131013025	1.59786	0.273485	2.54661	0.000691311	0.0274317
ENSSSCT00000000834	ENSSSCG00000000770	MICAL3	chr5:72159022-72254310	10.3297	4.54766	1.18361	8.16039e-05	0.00528669
ENSSSCT00000018119	ENSSSCG00000016641	-	chr18:35200926-35201106	7264.53	336.1	4.43391	4.81783e-09	1.5294e-06
ENSSSCT00000035556	ENSSSCG00000030849	RPL39	chrX:113430784-113434238	2806.52	1168.81	1.26374	0.000676983	0.0270491
ENSSSCT00000023689	ENSSSCG00000030168	CYP19A1	chr1:133903978-133936093	40.2755	13.815	1.54367	3.43968e-06	0.000414387
ENSSSCT00000033179	ENSSSCG00000006581	S100A16	chr4:104961766-104968635	6.11796	0.474788	3.68769	0.00119257	0.0406415
ENSSSCT00000010803	ENSSSCG00000009856	NOS1	chr14:37428595-37515630	0.643532	0.139583	2.20489	0.00056516	0.0237468
ENSSSCT00000032220	ENSSSCG00000028414	MINOS1	chr6:72084474-72119250	197.701	75.4056	1.39058	8.04209e-07	0.000119575
ENSSSCT00000008225	ENSSSCG00000007510	C20orf85	chr17:65584606-65594592	7.94576	0	inf	9.54255e-06	0.000970908
ENSSSCT00000029805	ENSSSCG00000027544	-	GL894842.1:1102-13375	354.26	70.9428	2.32008	8.43769e-15	1.96357e-11
ENSSSCT00000013960	ENSSSCG00000023084	-	chr13:73576874-73673698	1.26096	0.152342	3.04914	6.18328e-05	0.00422118
ENSSSCT00000012613	ENSSSCG00000011524	CHL1	chr13:62800354-62986290	1.74215	0.367193	2.24626	0.000130989	0.0078088
ENSSSCT00000004744	ENSSSCG00000004290	TBX18	chr1:60192744-60222789	1.25636	0.325654	1.94784	0.00117483	0.0402528
ENSSSCT00000036092	ENSSSCG00000014372	IK	chr2:148305086-148328487	51.4914	22.3477	1.2042	3.50313e-05	0.00272228
ENSSSCT00000032575	ENSSSCG00000015519	RASAL2	chr9:131679499-132012064	0.709324	0	inf	0.000258976	0.0131222
ENSSSCT00000012962	ENSSSCG00000011850	MUC4	chr13:143786442-143842402	0.607233	0.0598083	3.34383	0.000296186	0.0146567
ENSSSCT00000012968	ENSSSCG00000011855	IQCG	chr13:144134972-144178696	2.25293	0.134976	4.06103	0.000203569	0.0109492
ENSSSCT00000009083	ENSSSCG00000008294	ACTG2	chr3:72251855-72310387	312.259	58.0294	2.42788	2.22045e-16	7.41968e-13
ENSSSCT00000025513	ENSSSCG00000022857	TFF3	chr13:216044020-216046817	49.6509	1.28471	5.2723	0.000457421	0.020302
ENSSSCT00000012336	ENSSSCG00000011268	-	chr13:26655238-26809746	3.23178	0	inf	0.00052975	0.0225727
ENSSSCT00000012488	ENSSSCG00000011408	ZMYND10	chr13:36004202-36008027	8.51787	1.14147	2.8996	6.64731e-07	0.000102435
ENSSSCT00000004133	ENSSSCG00000003733	KLHL14	chr6:109214945-109334932	0.881971	0.0957298	3.20369	0.000147454	0.00852617
ENSSSCT00000000153	ENSSSCG00000000146	MYH11	GL893077.1:10936-50415	390.087	78.0209	2.32186	5.17719e-12	3.91303e-09
ENSSSCT00000026879	ENSSSCG00000011463	IL17RD	chr13:42816475-42839524	0.890412	0	inf	0.00132842	0.0438359
ENSSSCT00000024560	ENSSSCG00000022924	-	chr13:126399746-126461416	454.792	118.451	1.94091	0.00150242	0.0479658
ENSSSCT00000024566	ENSSSCG00000029993	-	GL896259.2:38772-53642	5.38049	0.331709	4.01974	6.23235e-08	1.3016e-05
ENSSSCT00000032104	ENSSSCG00000001429	-	chr7:27939413-27958858	7.54574	3.32206	1.18358	0.000460217	0.0204041
ENSSSCT00000023814	ENSSSCG00000023690	PTMA	GL894918.2:6122-7597	4664.58	1614.59	1.53058	4.14189e-08	9.35817e-06
ENSSSCT00000005847	ENSSSCG00000005309	FAM166B	chr1:263990420-264050014	8.3561	0.353603	4.56263	5.39344e-09	1.69517e-06
ENSSSCT00000013273	ENSSSCG00000012134	PIGA	chrX:12832295-12847005	2.25014	0.244748	3.20065	5.81008e-05	0.00404497
ENSSSCT00000001016	ENSSSCG00000000931	MGAT4C	chr5:100820115-101008693	3.23735	0.483573	2.74301	4.21946e-06	0.000493351
ENSSSCT00000014869	ENSSSCG00000013614	CNN1	chr2:70536386-70544292	151.294	37.7315	2.00351	3.77631e-12	3.00768e-09
ENSSSCT00000033922	ENSSSCG00000006002	NOV	chr4:20522555-20533993	24.2446	11.1521	1.12034	0.000250236	0.0127711
ENSSSCT00000011997	ENSSSCG00000010960	SLC28A3	chr10:34734229-34768182	2.48598	0.0320103	6.27913	2.12037e-05	0.00180214
ENSSSCT00000011995	ENSSSCG00000010959	-	chr10:34253162-34313564	5.37825	0	inf	3.51086e-05	0.00272495
ENSSSCT00000002782	ENSSSCG00000002504	AK7	chr7:124867918-124925154	5.70025	0.473917	3.58832	2.70842e-09	9.05025e-07
ENSSSCT00000003125	ENSSSCG00000002824	-	chr6:27276810-27380644	11.0681	1.00583	3.45996	5.91336e-07	9.24713e-05
ENSSSCT00000003127	ENSSSCG00000002826	-	chr6:27276810-27380644	18.5189	1.15617	4.00158	2.24265e-14	4.18775e-11
ENSSSCT00000003126	ENSSSCG00000002825	-	chr6:27276810-27380644	17.1399	1.38053	3.63406	1.62315e-13	2.06104e-10
ENSSSCT00000030906	ENSSSCG00000005205	KIAA2026	chr1:241842298-241952442	0.791468	0	inf	2.77573e-05	0.00225068
ENSSSCT00000030908	ENSSSCG00000029782	CELA1	chr5:17250141-17272282	9.45839	0.555478	4.08979	3.50127e-08	8.08334e-06
ENSSSCT00000011605	ENSSSCG00000010609	CFAP43	chr14:124991354-125143165	1.67592	0.0505253	5.0518	6.14307e-07	9.55925e-05
ENSSSCT00000018510	ENSSSCG00000016998	NPM1	chr16:56963966-56978495	279.824	135.733	1.04375	0.00036557	0.0172307
ENSSSCT00000018517	ENSSSCG00000017005	KCNMB1	chr16:57959703-57971192	15.3556	2.32736	2.722	8.38854e-07	0.000123282
ENSSSCT00000022887	ENSSSCG00000016077	HSPD1	chr15:112534189-112547852	9.06973	1.45235	2.64267	2.69606e-07	4.75472e-05
ENSSSCT00000027610	ENSSSCG00000021514	-	chr16:51547446-51598581	4.81096	1.13341	2.08566	3.42137e-06	0.00041392
ENSSSCT00000012249	ENSSSCG00000011186	COL6A5	chr13:1791732-1881007	18.7117	9.50104	0.977786	0.000435525	0.0196848
ENSSSCT00000027053	ENSSSCG00000021571	KIF27	chr10:34991988-35042862	6.2885	2.55277	1.30065	0.00121324	0.0410158
ENSSSCT00000019273	ENSSSCG00000017707	TAF15	chr12:41256358-41277426	21.4404	8.47787	1.33856	6.36685e-05	0.00431403
ENSSSCT00000029139	ENSSSCG00000026689	CCDC114	chr6:49364537-49390203	1.5018	0	inf	2.62201e-06	0.000325134
ENSSSCT00000004187	ENSSSCG00000003784	LRRIQ3	chr6:128715727-128766182	11.5475	4.03665	1.51635	0.00126104	0.0422492
ENSSSCT00000004454	ENSSSCG00000004028	C6orf118	chr1:4758550-4776214	0.95518	0	inf	0.00128442	0.0427391
ENSSSCT00000016759	ENSSSCG00000015384	TOMM7	chr9:100959711-100968624	550.029	258.976	1.08669	0.000115237	0.0070552
ENSSSCT00000016754	ENSSSCG00000015379	DNAH11	chr9:99840593-100233792	2.63515	0.526049	2.32462	9.36196e-10	3.49636e-07
ENSSSCT00000004232	ENSSSCG00000003823	C1orf87	chr6:139665482-139746337	2.28231	0.147011	3.9565	1.30169e-05	0.00122616
ENSSSCT00000033656	ENSSSCG00000007718	CLDN4	chr3:10776891-10780656	10.2527	0.981932	3.38424	1.51681e-10	7.18663e-08
ENSSSCT00000034030	ENSSSCG00000002792	HSF4	chr6:25083304-25088375	33.0988	10.7577	1.62141	0.00120884	0.0409634
ENSSSCT00000006080	ENSSSCG00000005529	MORN5	chr1:294559948-294571745	4.5712	0	inf	0.00103286	0.0368808
ENSSSCT00000009509	ENSSSCG00000008691	TNIP2	chr8:1115003-1136982	2.64793	0.638622	2.05183	0.00135653	0.0445089
ENSSSCT00000027712	ENSSSCG00000025655	CCDC180	chr1:267252680-267327315	1.17947	0.163641	2.84952	6.2155e-06	0.000680372
ENSSSCT00000018994	ENSSSCG00000017448	KRT19	chr12:21536798-21540282	52.3805	8.85874	2.56386	1.57208e-13	2.03693e-10
ENSSSCT00000018460	ENSSSCG00000028231	-	chr16:47533975-47681209	1301.56	598.899	1.11986	6.43534e-05	0.00435579
ENSSSCT00000010277	ENSSSCG00000009380	NEK5	chr11:16128791-16201490	1.5319	0.216085	2.82566	0.000956338	0.0349515
ENSSSCT00000018266	ENSSSCG00000024462	RPL36A	chr16:97366-174390	1305.19	598.581	1.12464	5.98761e-05	0.00414441
ENSSSCT00000032138	ENSSSCG00000005494	-	chr1:286732771-286813962	6.69431	1.50042	2.15757	1.53886e-07	2.89914e-05
ENSSSCT00000032134	ENSSSCG00000029762	-	chr6:110933227-111005312	2.59662	0.615138	2.07766	9.60681e-06	0.000972769
ENSSSCT00000027102	ENSSSCG00000025305	-	chr3:140434475-140444644	14.5616	7.03318	1.04992	0.00063431	0.0257986
ENSSSCT00000023821	ENSSSCG00000015947	DCAF17	chr15:86948085-86987701	0.687425	0	inf	9.31274e-05	0.00589098
ENSSSCT00000012666	ENSSSCG00000011574	-	JH118519.1:32347-88038	2.31166	0.264532	3.12741	0.00013437	0.00795085
ENSSSCT00000009978	ENSSSCG00000009111	SYNPO2	chr8:112415521-112556423	60.974	25.4611	1.2599	1.21828e-05	0.00117193
ENSSSCT00000001020	ENSSSCG00000000934	LRRIQ1	chr5:101863993-101950290	2.64137	0.491433	2.42622	3.3635e-06	0.000409876
ENSSSCT00000013305	ENSSSCG00000012164	CNKSR2	chrX:18898824-19131462	0.647111	0	inf	0.00111622	0.0389381
ENSSSCT00000023323	ENSSSCG00000021724	KIF19	chr12:6742502-6769436	2.13594	0.0744547	4.84237	4.91884e-08	1.06949e-05
ENSSSCT00000009582	ENSSSCG00000008758	SLC34A2	chr8:19832501-19848016	2.34267	0.587686	1.99504	0.000118626	0.00720712
ENSSSCT00000006581	ENSSSCG00000005998	DEPTOR	chr4:20006540-20171545	5.55745	0	inf	1.21288e-05	0.0011685
ENSSSCT00000008329	ENSSSCG00000007589	-	chr3:5209361-5259886	1.16287	0.211903	2.45621	0.00111562	0.0389381
ENSSSCT00000028434	ENSSSCG00000028804	CCDC181	chr4:89185741-89219499	3.64912	0.875176	2.0599	4.96553e-05	0.00360971
ENSSSCT00000001573	ENSSSCG00000023611	TNXB	chr7:27681440-27725977	9.77964	4.04612	1.27324	2.45575e-05	0.00204342
ENSSSCT00000033720	ENSSSCG00000012699	FHL1	chrX:127232156-127289862	72.6703	37.2597	0.963751	0.000932437	0.0342788
ENSSSCT00000005777	ENSSSCG00000005243	-	chr1:247961313-248144476	75.9736	18.1106	2.06866	7.88036e-13	8.14785e-10
ENSSSCT00000022266	ENSSSCG00000015796	PDLIM3	chr15:53297821-53328139	46.1215	20.3433	1.18089	5.79102e-05	0.00404411
ENSSSCT00000025258	ENSSSCG00000023628	-	chr15:8286398-8286581	3852.35	537.1	2.84248	2.66912e-05	0.00217878
ENSSSCT00000026283	ENSSSCG00000025436	ILDR1	chr13:148157363-148185006	1.60186	0.265153	2.59485	0.000893203	0.0331823
ENSSSCT00000023943	ENSSSCG00000005494	-	chr1:286732771-286813962	4.01617	1.46185	1.45803	0.000853586	0.0321813
ENSSSCT00000029040	ENSSSCG00000026923	-	chr14:95320882-95323105	264.123	60.622	2.1233	1.20054e-09	4.30629e-07
ENSSSCT00000005257	ENSSSCG00000004758	RHOV	chr1:145601505-145603655	2.89296	0.47619	2.60293	9.78726e-05	0.00614623
ENSSSCT00000025358	ENSSSCG00000022504	CDON	GL892477.1:3381-26367	27.5234	14.2231	0.952421	0.000982247	0.0356581
ENSSSCT00000012469	ENSSSCG00000011391	CDHR4	chr13:35501373-35508389	2.03001	0.272195	2.89877	4.45208e-05	0.00329438
ENSSSCT00000005475	ENSSSCG00000004963	-	chr1:184592889-184632448	55.2607	27.1085	1.02751	0.000280941	0.0140446
ENSSSCT00000009150	ENSSSCG00000008356	-	chr3:79353585-79358978	37.1901	12.0843	1.62179	5.74615e-05	0.00402224
ENSSSCT00000030699	ENSSSCG00000010742	UROS	chr14:146730877-146928694	1.87304	0	inf	0.00102662	0.0367999
ENSSSCT00000022974	ENSSSCG00000025427	CU459197.4	chr4:37533669-37584072	4.34311	0.492569	3.14033	0.000181864	0.0100261
ENSSSCT00000016787	ENSSSCG00000015412	CCDC146	chr9:113119526-113180465	1.7461	0.146583	3.57435	1.84875e-05	0.00163003
ENSSSCT00000010335	ENSSSCG00000009428	FAM216B	chr11:24964615-24974127	2.14104	0.0800374	4.74149	1.08317e-05	0.0010762
ENSSSCT00000013013	ENSSSCG00000011892	MAATS1	chr13:149805375-149879050	4.09926	0.948389	2.11181	0.000255699	0.0129971
ENSSSCT00000011508	ENSSSCG00000010518	EXOSC1	chr14:118339310-118346732	20.3979	9.34262	1.12652	0.0008078	0.0308954
ENSSSCT00000006137	ENSSSCG00000005584	CRB2	chr1:297889591-297910738	1.30845	0.337706	1.95401	0.00112797	0.0392405
ENSSSCT00000006697	ENSSSCG00000006105	GEM	chr4:45876685-45889986	26.7869	8.8794	1.59299	1.61218e-06	0.000213242
ENSSSCT00000007439	ENSSSCG00000006791	OVGP1	chr4:119112228-119124274	36.6178	3.97229	3.2045	0	0
ENSSSCT00000012981	ENSSSCG00000011867	MYLK	chr13:146205267-146232577	108.779	45.2542	1.26527	6.75388e-06	0.000730489
ENSSSCT00000019388	ENSSSCG00000017814	C17orf97	chr12:49503227-49506132	10.5802	2.27536	2.21721	0.000299341	0.0147553
ENSSSCT00000005941	ENSSSCG00000005398	-	chr1:271586833-271591395	6.58457	0.369068	4.15713	9.68628e-10	3.59633e-07
ENSSSCT00000007896	ENSSSCG00000007216	DEFB115	chr17:39835619-39837756	19.7288	0	inf	4.2726e-05	0.00318011
ENSSSCT00000034282	ENSSSCG00000029857	EIF2S3	chrX:21554147-21590225	17.1243	4.23053	2.01713	0.000184835	0.0101778
ENSSSCT00000011156	ENSSSCG00000010190	ACTA1	chr14:65236450-65239189	17.1553	0.230459	6.218	2.22045e-16	7.41968e-13
ENSSSCT00000004158	ENSSSCG00000003756	LPAR3	chr6:119296617-119374200	1.25244	0.0786858	3.99249	1.05581e-05	0.00105066
ENSSSCT00000002650	ENSSSCG00000002383	FOS	chr7:104293656-104297121	45.5516	17.3025	1.39652	1.54954e-06	0.000207113
ENSSSCT00000030618	ENSSSCG00000021549	-	chr2:127982273-127988802	1.80036	0.251516	2.83957	0.0013872	0.0452347
ENSSSCT00000022463	ENSSSCG00000029900	DMPK	GL896302.1:110787-119908	19.2656	6.23806	1.62686	1.21147e-05	0.0011685
ENSSSCT00000031984	ENSSSCG00000030095	ZBTB16	chr9:46458176-46459448	36.1079	10.7537	1.74748	5.27588e-07	8.41609e-05
ENSSSCT00000017273	ENSSSCG00000015862	LIMS2	chr15:66435455-66453016	37.4313	16.2894	1.20031	8.8294e-05	0.00563632
ENSSSCT00000030835	ENSSSCG00000024357	DNAI2	chr12:6779151-6799278	2.3654	0.447932	2.40073	0.00036938	0.0173458
ENSSSCT00000013217	ENSSSCG00000012083	RIPK4	chr13:215452666-215478472	1.26861	0.249818	2.3443	0.000278731	0.0139671
ENSSSCT00000029292	ENSSSCG00000029825	CNTRL	chr1:293302881-293310134	25.9219	7.83729	1.72574	3.36522e-05	0.00263445
ENSSSCT00000006612	ENSSSCG00000006025	PKHD1L1	chr4:30267984-30406481	4.65558	1.35884	1.77659	2.5108e-08	6.25262e-06
ENSSSCT00000024869	ENSSSCG00000028127	-	GL894711.1:14162-36161	5.24478	0.443781	3.56296	2.25531e-06	0.000287236
ENSSSCT00000028583	ENSSSCG00000026834	-	chr15:119914392-119914563	5973.57	320.491	4.22024	1.68759e-05	0.0015114
ENSSSCT00000030180	ENSSSCG00000024137	-	GL896056.1:11610-17518	267.44	109.167	1.29268	0.00141555	0.0460175
ENSSSCT00000029479	ENSSSCG00000028338	PAMR1	chr2:27877534-27954885	15.8734	7.82397	1.02064	0.0011785	0.0403135
ENSSSCT00000018785	ENSSSCG00000017256	-	chr12:11806255-11850359	5.11478	1.13016	2.17815	5.40137e-07	8.56536e-05
ENSSSCT00000003886	ENSSSCG00000003498	UBXN10	chr6:72647736-72654865	7.10098	0.473741	3.90585	4.60915e-08	1.02318e-05
ENSSSCT00000031425	ENSSSCG00000026140	S100B	GL896219.1:23648-28092	116.628	53.1018	1.13508	4.86404e-05	0.00355775
ENSSSCT00000023121	ENSSSCG00000007991	WDR90	chr3:41353995-41369701	1.25743	0.377493	1.73596	0.000970191	0.0353191
ENSSSCT00000004756	ENSSSCG00000004302	-	chr1:62517228-62545844	1.18766	0.177309	2.74379	0.000982393	0.0356581
ENSSSCT00000011361	ENSSSCG00000010379	FRMPD2	chr14:96480945-96624947	1.03356	0	inf	1.63527e-05	0.0014735
ENSSSCT00000002046	ENSSSCG00000001826	CFAP100	chr7:58791314-58820798	2.30881	0.320284	2.84973	0.000120483	0.00726433
ENSSSCT00000018005	ENSSSCG00000016535	CALD1	chr18:15075828-15194597	2.28296	0.36333	2.65155	7.79131e-05	0.00509938
ENSSSCT00000010738	ENSSSCG00000009796	-	chr14:32071926-32087531	1.0112	0.124313	3.02402	0.0012315	0.0414564
ENSSSCT00000001275	ENSSSCG00000001177	-	chr7:23180793-23181105	1767.25	882.558	1.00174	0.000283798	0.0141651
ENSSSCT00000011106	ENSSSCG00000010144	ACTN2	chr14:58645068-58717200	1.18598	0.33616	1.81886	0.00138511	0.0451897
ENSSSCT00000030104	ENSSSCG00000020785	DES	chr15:134534142-134587352	367.108	49.5105	2.8904	0	0
ENSSSCT00000030929	ENSSSCG00000023664	-	chr13:32830279-32904503	18.548	5.18007	1.84022	0.000690306	0.0274089
ENSSSCT00000016674	ENSSSCG00000015303	-	chr9:77078548-77083335	6.6019	0.621623	3.40877	0.000230582	0.0119701
ENSSSCT00000023543	ENSSSCG00000030422	PFDN1	chr2:147990659-148021334	301.979	131.553	1.1988	0.000859619	0.0323511
ENSSSCT00000016859	ENSSSCG00000015476	CHI3L1	chr9:125344017-125353610	8.78884	2.81264	1.64375	0.000204369	0.010968
ENSSSCT00000017061	ENSSSCG00000015663	C4BPA	chr9:74195615-74207951	125.352	55.767	1.1685	3.59956e-05	0.00277095
ENSSSCT00000009374	ENSSSCG00000008568	DRC1	chr3:119649280-119782862	3.64912	0.248341	3.87715	2.00193e-07	3.64185e-05
ENSSSCT00000001619	ENSSSCG00000001459	-	chr7:29241939-29249407	2.41591	0.57577	2.069	0.00130414	0.0431702
ENSSSCT00000012275	ENSSSCG00000011209	UBE2E2	chr13:11688025-11779399	9.60035	1.08149	3.15006	1.31774e-05	0.00123578
ENSSSCT00000019096	ENSSSCG00000017542	TTLL6	chr12:24942731-24980527	0.751984	0	inf	0.000398115	0.0183959
ENSSSCT00000018328	ENSSSCG00000016833	CAPSL	chr16:22331823-22389296	10.1325	2.19995	2.20344	8.021e-05	0.00521057
ENSSSCT00000010119	ENSSSCG00000009239	-	chr8:144504871-144531061	11.8565	0.295343	5.32714	6.11483e-07	9.53868e-05
ENSSSCT00000002726	ENSSSCG00000002456	CHGA	chr7:120954017-120966278	36.5408	16.1116	1.18141	0.000112023	0.00691177
ENSSSCT00000001965	ENSSSCG00000001759	DNAJA4	chr7:53214359-53228751	16.3256	7.94915	1.03826	0.000815577	0.0311615
ENSSSCT00000007604	ENSSSCG00000006940	CYR61	chr4:142924365-142927632	54.9027	14.501	1.92073	4.91218e-11	2.59891e-08
ENSSSCT00000025309	ENSSSCG00000022631	-	chr4:120122173-120122984	2591.96	319.567	3.01985	0.0012863	0.0427529
ENSSSCT00000027772	ENSSSCG00000026478	PADI2	chr6:70039585-70099223	2.82211	0.750563	1.91073	2.03222e-05	0.00174121
ENSSSCT00000018979	ENSSSCG00000017433	KRT14	chr12:21339398-21343741	1.42715	0.116246	3.61788	0.001068	0.037796
ENSSSCT00000009105	ENSSSCG00000008314	ATP6V1B1	chr3:75019945-75029803	2.2787	0.0793949	4.84302	4.21627e-10	1.68356e-07
ENSSSCT00000005104	ENSSSCG00000004621	MYO5C	chr1:132514136-132624890	1.05101	0.14499	2.85776	1.49747e-05	0.00137191
ENSSSCT00000009813	ENSSSCG00000008959	CXCL2	chr8:74206842-74311988	4.09672	0	inf	5.4154e-05	0.00385015
ENSSSCT00000006766	ENSSSCG00000006172	PI15	chr4:66776707-66802989	36.3987	19.0623	0.933167	0.000781479	0.0301392
ENSSSCT00000024957	ENSSSCG00000023270	-	chr1:247247869-247250632	45.9768	14.4764	1.6672	0.000138374	0.00814955
ENSSSCT00000010605	ENSSSCG00000009672	SCARA5	chr14:12845866-12978045	18.7101	7.92585	1.23918	2.78998e-05	0.00225935
ENSSSCT00000006040	ENSSSCG00000026492	-	chr1:286604310-286608866	15.8478	5.10123	1.63537	0.0001646	0.00922356
ENSSSCT00000000271	ENSSSCG00000000252	KRT8	chr5:18663338-18671193	75.6794	14.8393	2.35048	1.15463e-14	2.52781e-11
ENSSSCT00000000272	ENSSSCG00000000253	KRT18	chr5:18725319-18729778	6.69668	0.431431	3.95624	2.929e-08	6.99095e-06
ENSSSCT00000017657	ENSSSCG00000016216	-	chr15:134341042-134347416	4.43309	0.448091	3.30645	2.28133e-06	0.000289101
ENSSSCT00000024859	ENSSSCG00000028047	-	chr6:110739416-110858569	9.90143	1.9737	2.32673	4.96206e-06	0.000561562
ENSSSCT00000029365	ENSSSCG00000023212	PPP1R14A	chr6:42669943-42674708	194.7	54.1362	1.84658	3.03966e-09	1.00513e-06
ENSSSCT00000019548	ENSSSCG00000021363	CHD3	chr12:55506215-55528405	39.8179	20.1147	0.98517	0.000486625	0.0212193
ENSSSCT00000010444	ENSSSCG00000009526	ITGBL1	chr11:77342231-77451329	25.0057	8.82706	1.50225	0.000114334	0.00701806
ENSSSCT00000016909	ENSSSCG00000015522	ANGPTL1	chr9:132314884-132493994	12.3295	2.27741	2.43664	2.69595e-08	6.58321e-06
ENSSSCT00000013365	ENSSSCG00000012219	CFAP47	chrX:35256762-35348268	2.46879	0.103417	4.57726	4.59126e-09	1.48071e-06
ENSSSCT00000012108	ENSSSCG00000011064	ACBD5	chr10:54199177-54227557	28.9325	13.6956	1.07897	0.000613127	0.025177
ENSSSCT00000007007	ENSSSCG00000006394	CFAP45	chr4:98569801-98589936	4.9616	0.322139	3.94505	1.82368e-06	0.000239222
ENSSSCT00000024385	ENSSSCG00000029399	-	GL893688.1:21661-31651	1777.61	367.81	2.2729	8.65974e-15	1.96357e-11
ENSSSCT00000032367	ENSSSCG00000030309	NDRG2	GL896236.1:20127-27185	140.897	76.0552	0.889518	0.0013282	0.0438359
ENSSSCT00000010877	ENSSSCG00000009926	-	chr14:43577627-43593228	7.01445	1.54608	2.18172	1.41216e-06	0.000194061
ENSSSCT00000010251	ENSSSCG00000009354	CCNA1	chr11:12355645-12364743	3.08952	0.325501	3.24665	2.00828e-05	0.00172769
ENSSSCT00000026882	ENSSSCG00000023335	COA5	chr3:58220286-58239025	400.65	80.7622	2.31059	0.000452496	0.0201639
ENSSSCT00000028692	ENSSSCG00000030168	CYP19A1	chr1:133903978-133936093	75.326	20.1902	1.89949	1.53703e-08	4.1175e-06
ENSSSCT00000001564	ENSSSCG00000024914	CFB	chr7:27771731-27777630	7.9143	2.91434	1.44129	0.00039858	0.018404
ENSSSCT00000006649	ENSSSCG00000006060	GRHL2	chr4:38266584-38413078	1.2484	0.304145	2.03725	0.000435782	0.0196848
ENSSSCT00000030748	ENSSSCG00000028588	-	GL895073.2:8127-13225	290.195	100.776	1.52587	9.03287e-08	1.80911e-05
ENSSSCT00000025775	ENSSSCG00000027935	FHOD3	chr6:112903784-113226657	1.28259	0.341284	1.91001	0.00120723	0.0409433
ENSSSCT00000003078	ENSSSCG00000002780	TPPP3	chr6:25312513-25316150	57.7828	28.2837	1.03067	0.000728321	0.0286141
ENSSSCT00000001001	ENSSSCG00000000917	KERA	chr5:96275118-96280110	5.04774	1.05056	2.26448	0.000481263	0.0210723
ENSSSCT00000014851	ENSSSCG00000013597	RPS28	chr2:71320355-71321505	6947.65	2465.67	1.49455	3.92665e-05	0.00296785
ENSSSCT00000011983	ENSSSCG00000010948	CTSL	chr10:31837904-32028811	347.13	167.09	1.05485	0.000423882	0.0192987
ENSSSCT00000002911	ENSSSCG00000002624	-	chr7:134263913-134267493	1947.87	454.959	2.09809	1.61426e-12	1.44349e-09
ENSSSCT00000004620	ENSSSCG00000004181	VNN1	chr1:34523096-34543521	11.5007	3.6905	1.63984	8.50707e-05	0.00547219
ENSSSCT00000024303	ENSSSCG00000022913	SLPI	chr17:53167237-53169798	79.1678	12.3865	2.67614	1.29284e-10	6.17153e-08
ENSSSCT00000000689	ENSSSCG00000000640	-	chr5:64347589-64352543	1.44235	0.107295	3.74876	0.000666508	0.0267146
ENSSSCT00000031620	ENSSSCG00000028167	SLIRP	GL896346.2:838-56816	555.062	271.259	1.03298	0.000546271	0.0230936
ENSSSCT00000030918	ENSSSCG00000026283	UBXN2A	chr3:121943290-121959714	8.95754	0	inf	3.52047e-05	0.00272907
ENSSSCT00000011610	ENSSSCG00000010614	-	chr14:125263735-125380998	2.24788	0.263423	3.09311	5.08614e-06	0.00057052
ENSSSCT00000023537	ENSSSCG00000029251	-	chr13:33948537-33951875	5.76638	2.3308	1.30684	0.000896438	0.0332441
ENSSSCT00000029761	ENSSSCG00000021006	-	GL896422.1:1697-3396	21.0943	7.99446	1.39978	0.000489255	0.0212902
ENSSSCT00000026800	ENSSSCG00000021902	GABRP	chr16:57477085-57495797	5.2942	0.361444	3.87257	2.25442e-11	1.40324e-08
ENSSSCT00000025641	ENSSSCG00000015071	SIK3	chr9:49296589-49404314	0.834079	0	inf	0.000116749	0.00712716
ENSSSCT00000016864	ENSSSCG00000015481	MYOC	chr9:125551262-125562629	9.3171	0.0379839	7.93835	5.58177e-08	1.19723e-05
ENSSSCT00000033740	ENSSSCG00000010497	ENTPD1	chr14:116929632-117025486	18.8674	1.15081	4.03517	1.00562e-05	0.00100703
ENSSSCT00000017096	ENSSSCG00000015696	MAP3K19	chr15:19383307-19421648	1.36022	0.0967782	3.81301	4.24293e-06	0.000495118
ENSSSCT00000012575	ENSSSCG00000011492	SNTN	chr13:49668180-49680601	7.04218	0	inf	0.000874319	0.0326439
ENSSSCT00000014526	ENSSSCG00000013300	EHF	chr2:28658520-28699570	8.23222	0.921361	3.15944	6.89795e-08	1.4219e-05
ENSSSCT00000011822	ENSSSCG00000010806	RGS2	chr10:2543422-2546894	92.2978	46.1442	1.00015	0.000340973	0.0163258
ENSSSCT00000003622	ENSSSCG00000003261	-	chr6:53196426-53199446	342.341	169.462	1.01447	0.000953199	0.034902
ENSSSCT00000003627	ENSSSCG00000003266	TMC4	chr6:53248508-53263198	0.932657	0.0678895	3.78009	0.000591238	0.024502
ENSSSCT00000022765	ENSSSCG00000030305	SLC15A2	chr13:148222429-148259036	3.72349	0.830915	2.16388	3.26615e-06	0.000399546
ENSSSCT00000017689	ENSSSCG00000016245	-	chr15:142504567-142537037	1.55772	0.31523	2.30496	0.000662496	0.0266109
ENSSSCT00000017535	ENSSSCG00000016105	ALS2CR12	chr15:116343374-116378421	0.744622	0	inf	0.000874319	0.0326439
ENSSSCT00000011271	ENSSSCG00000010298	CFAP70	chr14:82200384-82322025	3.09076	1.10957	1.47796	0.00158158	0.0497586
ENSSSCT00000002772	ENSSSCG00000002494	CLMN	chr7:123692884-123805784	1.16616	0.335775	1.79621	0.00148271	0.0477121
ENSSSCT00000001163	ENSSSCG00000001068	-	chr7:14013387-14052973	9.41879	4.06515	1.21223	0.00124196	0.0417842
ENSSSCT00000025991	ENSSSCG00000025266	-	chr3:24548184-24561515	5.98258	0.309867	4.27104	8.83096e-05	0.00563632
ENSSSCT00000034199	ENSSSCG00000023611	TNXB	chr7:27681440-27725977	9.88046	4.06016	1.28304	2.3969e-05	0.00200232
ENSSSCT00000033082	ENSSSCG00000022107	CHTOP	chr4:104889208-104898793	11.4404	2.22877	2.35983	2.24904e-05	0.00189125
ENSSSCT00000003275	ENSSSCG00000002953	-	chr6:42723118-42735370	181.553	49.0397	1.88837	3.19867e-05	0.00252274
ENSSSCT00000024597	ENSSSCG00000021242	-	chr7:106493556-106507577	2.32532	0.506225	2.19958	0.000714013	0.0282091
ENSSSCT00000008194	ENSSSCG00000007485	BCAS1	chr17:61649515-61820053	3.77752	0.243915	3.95299	1.838e-09	6.37666e-07
ENSSSCT00000012848	ENSSSCG00000011737	SERPINI2	chr13:114867790-114902088	1.34973	0	inf	0.000874319	0.0326439
ENSSSCT00000012849	ENSSSCG00000011738	WDR49	chr13:114946334-115027211	1.593	0.0998234	3.99622	1.03593e-05	0.00103412
ENSSSCT00000026485	ENSSSCG00000027678	CCDC175	chr1:209647814-209714640	0.997823	0	inf	0.000260122	0.0131383
ENSSSCT00000027574	ENSSSCG00000024312	ID4	chr7:16178088-16182991	14.9431	3.67195	2.02486	9.03542e-10	3.39438e-07
ENSSSCT00000027572	ENSSSCG00000026732	-	chr7:27962236-27970347	21.4489	5.90836	1.86007	8.33848e-08	1.69138e-05
ENSSSCT00000027684	ENSSSCG00000004371	AIM1	chr1:81996298-82061659	1.48278	0	inf	7.04291e-08	1.44241e-05
ENSSSCT00000019518	ENSSSCG00000017934	-	chr12:54826387-54828678	6.49115	1.00572	2.69025	9.52207e-06	0.00097038
ENSSSCT00000028568	ENSSSCG00000029058	C14H10orf116	chr14:95183008-95185230	307.256	58.2678	2.39867	4.87077e-12	3.77122e-09
ENSSSCT00000026979	ENSSSCG00000025910	ZNF277	chr18:36184985-36214490	131.802	57.3508	1.20049	0.000164162	0.0092153
ENSSSCT00000031521	ENSSSCG00000023627	LYPD6	chr15:2011779-2128138	3.76341	1.30256	1.53069	0.000416516	0.019052
ENSSSCT00000033582	ENSSSCG00000008939	JCHAIN	chr8:71347283-71358511	1.89311	0	inf	0.001271	0.0424933
ENSSSCT00000010263	ENSSSCG00000009366	STOML3	chr11:14239520-14253534	5.16466	1.54293	1.743	0.000442879	0.0198573
ENSSSCT00000027876	ENSSSCG00000020962	DYNLL2	chr12:35383128-35390288	92.6752	49.2598	0.911772	0.00113865	0.0394607
ENSSSCT00000034478	ENSSSCG00000004678	DUOX2	chr1:141218795-141241329	4.44238	1.2175	1.86741	5.23606e-06	0.000583215
ENSSSCT00000026397	ENSSSCG00000020976	CSRP1	chr10:28377348-28398394	97.0593	46.7035	1.05533	0.000155403	0.00884876
ENSSSCT00000027119	ENSSSCG00000027410	CBFA2T2	chr17:41984967-42071429	5.92675	0.372297	3.99272	5.63993e-14	8.7335e-11
ENSSSCT00000004289	ENSSSCG00000003877	FAF1	chr6:148923987-149306906	9.59935	1.50524	2.67294	4.32924e-10	1.7072e-07
ENSSSCT00000031026	ENSSSCG00000023904	CFAP57	chr6:155424280-155485848	0.595228	0	inf	0.000197085	0.0106946
ENSSSCT00000030583	ENSSSCG00000024308	-	chr14:123606435-123618566	960.484	196.262	2.29098	5.47871e-05	0.00388646
ENSSSCT00000002808	ENSSSCG00000002529	-	chr7:129322111-129322456	3445.02	1513.62	1.18651	4.39609e-05	0.00325675
ENSSSCT00000008090	ENSSSCG00000007391	MATN4	chr17:53223743-53233619	2.14573	0.483167	2.15087	0.00140396	0.0456639
ENSSSCT00000010752	ENSSSCG00000009809	MORN3	chr14:32796947-32811643	1.3953	0	inf	0.000739232	0.0289175
ENSSSCT00000001749	ENSSSCG00000001570	PI16	chr7:37504336-37514234	72.0384	15.5924	2.20792	8.21343e-13	8.14785e-10
ENSSSCT00000000506	ENSSSCG00000000468	-	chr5:32716591-32717533	5.24693	0	inf	0.00150213	0.0479658
ENSSSCT00000031617	ENSSSCG00000029773	HIST1H4A	chr7:23104553-23104865	2611.59	1251.19	1.06163	0.000118336	0.00719639
ENSSSCT00000030255	ENSSSCG00000028460	S1PR5	chr2:69608032-69657582	22.7382	8.84544	1.36211	1.74371e-05	0.00154834
ENSSSCT00000023640	ENSSSCG00000023393	ZBBX	chr13:114708593-114805501	1.78284	0.305074	2.54694	0.000241106	0.012425
ENSSSCT00000004397	ENSSSCG00000003975	KCNQ4	chr6:157395568-157449604	0.928446	0.118035	2.9756	0.00150269	0.0479658
ENSSSCT00000016344	ENSSSCG00000014982	MMP7	chr9:37133036-37143584	5.01744	0.429744	3.5454	2.56984e-06	0.000319914
ENSSSCT00000010592	ENSSSCG00000021111	-	chr2:155127627-155154535	29.6154	13.3665	1.14772	0.000435349	0.0196848
ENSSSCT00000024522	ENSSSCG00000009676	ZNF395	chr14:13293541-13338587	23.0182	11.2769	1.0294	0.000908751	0.0335736
ENSSSCT00000017644	ENSSSCG00000016203	CFAP65	chr15:134087003-134103779	1.15815	0.0408765	4.82441	0.00129348	0.0429057
ENSSSCT00000027194	ENSSSCG00000016535	CALD1	chr18:15075828-15194597	52.976	6.53473	3.01914	0	0
ENSSSCT00000012521	ENSSSCG00000011441	TNNC1	chr13:37805312-37808062	23.5274	1.65458	3.8298	3.25397e-07	5.52383e-05
ENSSSCT00000010965	ENSSSCG00000010008	SEC14L3	chr14:50491450-50502421	2.05276	0.0790766	4.69817	1.32159e-05	0.00123756
ENSSSCT00000003339	ENSSSCG00000003006	CYP2B6	chr6:44929853-44978800	0.966582	0.105491	3.19577	0.000584504	0.0243023
ENSSSCT00000031176	ENSSSCG00000020771	INHA	chr15:134507303-134511349	463.869	232.67	0.995431	0.00153624	0.0486943
ENSSSCT00000000010	ENSSSCG00000024718	-	chr5:1200224-1209799	5.85971	0.316869	4.20887	3.13182e-08	7.37447e-06
ENSSSCT00000001057	ENSSSCG00000000967	ODF3B	chr5:110562327-110564234	3.01967	0.23311	3.69531	0.000819313	0.0312604
ENSSSCT00000034060	ENSSSCG00000011833	DLG1	chr13:142336266-142629535	7.92817	2.09967	1.91683	3.68597e-05	0.0028229
ENSSSCT00000033699	ENSSSCG00000012597	PLS3	chrX:109452787-109539959	5.98895	0.880538	2.76585	7.2089e-06	0.000767929
ENSSSCT00000029964	ENSSSCG00000026175	FAM81B	chr2:105760789-105820910	2.28152	0	inf	7.99618e-05	0.00520153
ENSSSCT00000012283	ENSSSCG00000011217	NEK10	chr13:15305045-15475960	1.16458	0.0577648	4.33347	0.00133356	0.0438914
ENSSSCT00000011485	ENSSSCG00000010497	ENTPD1	chr14:116929632-117025486	5.50932	0	inf	1.22309e-07	2.38199e-05
ENSSSCT00000011482	ENSSSCG00000010494	SORBS1	chr14:116528969-116647727	9.31963	2.55461	1.86717	3.28059e-09	1.07918e-06
ENSSSCT00000029034	ENSSSCG00000027409	TCF23	chr3:118975364-118982315	26.352	11.4807	1.1987	2.13481e-05	0.001812
ENSSSCT00000019032	ENSSSCG00000017480	THRA	chr12:22489119-22502041	19.839	8.69295	1.19042	0.000815738	0.0311615
ENSSSCT00000025006	ENSSSCG00000022830	KANSL1L	chr15:124563201-124740175	20.8981	9.35504	1.15955	0.000164495	0.00922356
ENSSSCT00000035813	ENSSSCG00000011101	ITGB1	chr10:61450694-61502941	0.860682	0	inf	0.000361391	0.0170717
ENSSSCT00000018729	ENSSSCG00000017204	ITGB4	chr12:5597668-5632075	1.51867	0.0978361	3.9563	7.95381e-06	0.000831927
ENSSSCT00000018184	ENSSSCG00000016703	HOXA5	chr18:50062879-50065910	2.61853	0.324632	3.01188	2.04295e-05	0.00174805
ENSSSCT00000014166	ENSSSCG00000012960	CST6	chr2:5395319-5396971	28.1443	6.76054	2.05763	4.13754e-05	0.00311242
ENSSSCT00000031482	ENSSSCG00000028274	FAM131B	chr18:7134210-7181268	1.01335	0.159265	2.66963	2.64701e-05	0.0021721
ENSSSCT00000022963	ENSSSCG00000025311	-	GL896469.1:4124-9364	221.312	69.4164	1.67273	0.000114445	0.00701806
ENSSSCT00000030359	ENSSSCG00000028560	-	chr14:2838619-2839219	10.7604	1.98695	2.43711	0.00040906	0.0187922
ENSSSCT00000017048	ENSSSCG00000015651	PIGR	chr9:73889671-73899096	3.12195	0.413844	2.91529	2.32506e-07	4.15819e-05
ENSSSCT00000008167	ENSSSCG00000007463	PTGIS	chr17:57474334-57521756	40.474	21.1371	0.937221	0.000836469	0.031713
ENSSSCT00000009412	ENSSSCG00000008601	SDC1	chr3:125988734-125994234	9.24113	2.61213	1.82284	9.25128e-06	0.000950093
ENSSSCT00000004898	ENSSSCG00000004433	HS3ST5	chr1:90017730-90023575	0.948712	0	inf	0.000439676	0.0197555
ENSSSCT00000018101	ENSSSCG00000016626	CFTR	chr18:30396464-30566740	2.42967	0.223663	3.44136	1.3764e-08	3.81599e-06
ENSSSCT00000002668	ENSSSCG00000002400	-	chr7:106275597-106444823	1.57682	0.218296	2.85266	0.00159105	0.0498835
ENSSSCT00000036290	ENSSSCG00000030839	JUN	chr6:141230120-141233597	75.3556	31.1058	1.27653	7.03064e-06	0.000754001
ENSSSCT00000035354	ENSSSCG00000001242	GABBR1	chr7:25210912-25240202	1.05864	0	inf	0.000461289	0.0204374
ENSSSCT00000016715	ENSSSCG00000015342	COL28A1	chr9:85222168-85494172	1.58184	0.277951	2.50871	0.000149539	0.00859906
ENSSSCT00000019171	ENSSSCG00000017609	ANKFN1	chr12:33480571-33634826	1.28442	0	inf	9.30972e-05	0.00589098
ENSSSCT00000028141	ENSSSCG00000024919	RDH16	chr5:24133017-24139024	5.95155	1.91843	1.63333	0.00102117	0.0366668
ENSSSCT00000015480	ENSSSCG00000014170	CAST	chr2:106934105-107128389	32.4843	16.0286	1.01909	0.000659292	0.0265091
ENSSSCT00000014281	ENSSSCG00000013065	ASRGL1	chr2:8649632-8675487	24.1095	12.5767	0.938855	0.00108412	0.0381327
ENSSSCT00000014759	ENSSSCG00000013512	PLIN4	chr2:74810873-74822994	1.6859	0.191665	3.13686	1.14056e-06	0.000161998
ENSSSCT00000024443	ENSSSCG00000030406	-	chr1:84598998-84622404	2.30554	0.201325	3.5175	1.31337e-05	0.0012335
ENSSSCT00000024448	ENSSSCG00000022818	-	chr12:28497770-28499345	37.6307	8.02631	2.2291	1.27937e-10	6.15347e-08
ENSSSCT00000027520	ENSSSCG00000024934	-	chr2:147137155-147147197	113.462	40.8708	1.47306	0.00128685	0.0427529
ENSSSCT00000017673	ENSSSCG00000016231	-	chr15:136930814-136936376	5.47727	0	inf	0.000247496	0.012672
ENSSSCT00000011739	ENSSSCG00000010728	CPXM2	chr14:144881644-145010683	68.4885	28.6782	1.25591	7.52515e-06	0.000798937
ENSSSCT00000025832	ENSSSCG00000020978	-	GL893077.1:1132-9650	275.322	46.4476	2.56744	0	0
ENSSSCT00000008599	ENSSSCG00000007849	CRYM	chr3:25531595-25569629	26.6391	12.3656	1.10721	0.00104721	0.0372679
ENSSSCT00000012127	ENSSSCG00000011080	SPAG6	chr10:58151625-58226625	4.00003	0.129112	4.95332	2.26114e-08	5.7886e-06
ENSSSCT00000012124	ENSSSCG00000011078	ARMC3	chr10:57615453-57702468	1.43483	0.0915037	3.97091	1.18996e-05	0.00115663
ENSSSCT00000002977	ENSSSCG00000002684	CDH13	chr6:5213121-5364584	19.1378	6.96134	1.45899	9.26314e-06	0.000950093
ENSSSCT00000000555	ENSSSCG00000000515	TRHDE	chr5:39065886-39518064	2.13784	0.268404	2.99367	3.89152e-06	0.000458384
ENSSSCT00000016492	ENSSSCG00000015126	TRIM29	chr9:52347182-52374426	0.951804	0.146009	2.70461	0.000501633	0.0216507
ENSSSCT00000016374	ENSSSCG00000015010	EXPH5	chr9:41073545-41217329	2.22011	0.642599	1.78864	6.80109e-05	0.00457894
ENSSSCT00000026329	ENSSSCG00000025277	-	chr10:72009226-72022986	518.717	155.738	1.73582	2.11296e-07	3.81108e-05
ENSSSCT00000035444	ENSSSCG00000012699	FHL1	chrX:127232156-127289862	15.8584	0.156561	6.66238	0.000540564	0.0229563
ENSSSCT00000027498	ENSSSCG00000021105	DPEP2	chr6:26020413-26025817	5.89536	1.53337	1.94287	0.000166348	0.00930509
ENSSSCT00000035869	ENSSSCG00000025777	ESR1	chr1:16870878-16871069	7675.01	1129.18	2.76489	1.05896e-08	3.04218e-06
ENSSSCT00000028675	ENSSSCG00000028471	DTHD1	chr8:29366903-29438494	2.28055	0.122469	4.2189	8.83534e-08	1.77515e-05
ENSSSCT00000005854	ENSSSCG00000005316	TPM2	chr1:264127280-264134736	681.267	319.126	1.09409	0.000692402	0.0274502
ENSSSCT00000006336	ENSSSCG00000005760	C9orf116	chr1:308630223-308634807	6.23943	1.64749	1.92114	0.00120049	0.0408236
ENSSSCT00000010414	ENSSSCG00000009497	-	chr11:71298809-71453998	2.23211	0.265957	3.06915	4.92479e-09	1.55557e-06
ENSSSCT00000035960	ENSSSCG00000002981	DMBT1	chr6:43728924-43753137	11.1144	0.553894	4.32668	2.68674e-14	4.72453e-11
ENSSSCT00000010707	ENSSSCG00000009765	DNAH10	chr14:30793246-30941747	4.26719	1.45409	1.55316	6.7301e-07	0.00010321
ENSSSCT00000035377	ENSSSCG00000012149	RBBP7	chrX:14288823-14312580	98.0958	27.8541	1.8163	1.38428e-05	0.00128677
ENSSSCT00000018717	ENSSSCG00000017192	EVPL	chr12:5364941-5381504	1.37624	0.268119	2.35979	1.69274e-05	0.00151367
ENSSSCT00000018712	ENSSSCG00000017187	FOXJ1	chr12:5211494-5216372	13.8387	0.580926	4.57421	0	0
ENSSSCT00000004343	ENSSSCG00000003927	TCTEX1D4	chr6:153998344-154112791	8.80013	0.464719	4.2431	2.35485e-07	4.19963e-05
ENSSSCT00000028807	ENSSSCG00000026208	-	chr13:28324794-28325861	521.422	81.9337	2.66992	0.000643294	0.0260639
ENSSSCT00000023715	ENSSSCG00000029613	SYNM	chr1:154019850-154044632	85.9653	26.7841	1.68237	9.71349e-09	2.8289e-06
ENSSSCT00000030564	ENSSSCG00000029879	LTF	chr13:32577738-32609442	10.8712	1.48466	2.87231	1.73491e-10	8.09909e-08
ENSSSCT00000011782	ENSSSCG00000010768	-	chr14:152941743-152985164	2.29434	0.609548	1.91227	0.000307188	0.0150487
ENSSSCT00000019064	ENSSSCG00000017511	PLXDC1	chr12:23526393-23586953	8.29369	2.75242	1.59132	0.000759434	0.0295078
ENSSSCT00000019069	ENSSSCG00000017515	TBKBP1	chr12:23822481-23841532	0.891162	0.0929712	3.26083	0.00106719	0.0377886
ENSSSCT00000002719	ENSSSCG00000002449	NDUFB1	chr7:120296366-120298214	1847.97	896.37	1.04377	0.000152363	0.00872258
ENSSSCT00000022508	ENSSSCG00000024947	-	chr16:34854095-34902399	859.015	420.08	1.03202	0.00130648	0.043224
ENSSSCT00000014234	ENSSSCG00000013022	PYGM	chr2:6542312-6553842	10.8333	2.59124	2.06376	9.54486e-08	1.89967e-05
ENSSSCT00000027028	ENSSSCG00000022839	-	chr6:71470879-71540224	10.4793	5.13767	1.02835	0.000527286	0.0225433
ENSSSCT00000032863	ENSSSCG00000002795	CDH11	chr6:23708328-23815130	19.4203	4.64676	2.06327	0.000902395	0.033426
ENSSSCT00000023008	ENSSSCG00000024230	MYL9	chr17:45264860-45272225	52.7505	18.8575	1.48405	7.77058e-07	0.000116297
ENSSSCT00000029781	ENSSSCG00000029634	-	chr9:2455369-2528783	14.3438	5.31889	1.43123	0.000907201	0.0335453
ENSSSCT00000028251	ENSSSCG00000028982	-	chr10:71747463-71761223	461.837	140.135	1.72057	1.40674e-07	2.67403e-05
ENSSSCT00000007180	ENSSSCG00000006555	C1orf189	chr4:104448279-104451792	7.3971	0.964356	2.93932	0.000582914	0.0242943
ENSSSCT00000007406	ENSSSCG00000006760	HIPK1	chr4:116708891-116821627	0.753907	0	inf	1.49619e-05	0.00137191
ENSSSCT00000019185	ENSSSCG00000017623	-	chr12:35065718-35082400	0.636987	0	inf	0.000747564	0.0291357
ENSSSCT00000010639	ENSSSCG00000009704	HMGB2	chr14:17859678-17862757	37.9885	16.8214	1.17526	0.000342171	0.0163462
ENSSSCT00000010638	ENSSSCG00000009703	HAND2	chr14:17528446-17531529	3.89895	0.195618	4.31697	4.09826e-08	9.29265e-06
ENSSSCT00000003934	ENSSSCG00000003542	-	chr6:75902525-75902717	738.18	63.805	3.53223	0.000404746	0.018648
ENSSSCT00000036078	ENSSSCG00000003048	CXCL17	chr6:45981952-46078610	5.09393	0.461078	3.46569	9.63518e-05	0.00608079
ENSSSCT00000017627	ENSSSCG00000016187	-	chr15:133462314-133468029	1.88221	0	inf	0.000627352	0.0255977
ENSSSCT00000009670	ENSSSCG00000008834	-	chr8:41338762-41379906	4.91291	0.208021	4.56178	2.10315e-08	5.45007e-06
ENSSSCT00000012113	ENSSSCG00000011069	ARMC4	chr10:53394012-53520552	7.0693	1.59872	2.14465	9.58592e-06	0.000972205
ENSSSCT00000001180	ENSSSCG00000001085	DCDC2	chr7:20197881-20368697	6.41325	0.690147	3.21608	2.51692e-10	1.10205e-07
ENSSSCT00000007079	ENSSSCG00000006462	LRRC71	chr4:101734569-101747874	3.28535	0.200489	4.03445	3.6703e-07	6.18099e-05
ENSSSCT00000025398	ENSSSCG00000028184	DNAH1	chr13:37680290-37757842	1.02773	0.124898	3.04064	1.03395e-08	2.98383e-06
ENSSSCT00000027702	ENSSSCG00000028813	SFTA2	chr7:27142712-27143699	7.0159	0	inf	7.39012e-05	0.00486859
ENSSSCT00000015202	ENSSSCG00000013916	COMP	chr2:58815801-58823375	2.68465	0.0325861	6.36433	1.61478e-05	0.00145833
ENSSSCT00000008769	ENSSSCG00000008001	MSLN	chr3:41448661-41452015	6.18002	1.66421	1.89277	0.000288708	0.0143818
ENSSSCT00000012673	ENSSSCG00000011580	TSEN2	chr13:75699480-75737598	18.0939	6.91714	1.38726	2.11272e-05	0.00180074
ENSSSCT00000011321	ENSSSCG00000010341	TSPAN14	chr14:88942294-88971100	35.0901	13.7737	1.34914	0.000429028	0.01947
ENSSSCT00000002001	ENSSSCG00000001786	CFAP161	chr7:55527118-55540522	3.11404	0.292244	3.41354	6.48893e-06	0.000705438
ENSSSCT00000004876	ENSSSCG00000004413	PPIL6	chr1:84743266-84786213	3.29484	0.357529	3.20408	8.83325e-05	0.00563632
ENSSSCT00000004878	ENSSSCG00000004415	-	chr1:84644861-84709541	1.43697	0.169323	3.08518	5.58638e-05	0.0039496
ENSSSCT00000030754	ENSSSCG00000027140	CDKN1B	GL896456.1:60362-64021	95.9518	46.2773	1.05201	0.00033986	0.0162848
ENSSSCT00000016179	ENSSSCG00000014827	PLEKHB1	chr9:8856571-8869589	3.46322	0.274529	3.65708	1.11091e-06	0.000158496
ENSSSCT00000033190	ENSSSCG00000030800	CXorf59	chrX:35406885-35533740	1.57487	0.250055	2.65491	0.000655681	0.0264476
ENSSSCT00000006200	ENSSSCG00000005638	-	chr1:302600678-302605199	48.0246	16.3173	1.55737	4.99718e-06	0.00056453
ENSSSCT00000013312	ENSSSCG00000012170	PTCHD1	chrX:20852076-20903482	0.774971	0	inf	0.000232629	0.0120566
ENSSSCT00000036626	ENSSSCG00000009213	ABCG2	chr8:140102485-140228767	8.92372	2.93485	1.60436	0.000295585	0.0146384
ENSSSCT00000012199	ENSSSCG00000011147	-	chr10:71833305-71847875	39.9483	16.8777	1.24302	0.000109371	0.0067745
ENSSSCT00000013862	ENSSSCG00000012680	GPC3	chrX:125676110-126059403	16.3856	5.55526	1.5605	4.23311e-05	0.00315812
ENSSSCT00000011422	ENSSSCG00000010437	PAPSS2	chr14:108701139-108789588	19.6342	8.36341	1.23121	0.000621774	0.0254354
ENSSSCT00000023667	ENSSSCG00000022049	-	chr7:23099682-23099994	2869.02	1512.37	0.923747	0.00083667	0.031713
ENSSSCT00000011625	ENSSSCG00000010629	ADRA2A	chr14:132403893-132405246	1.59438	0.129547	3.62145	0.00105589	0.0374859
ENSSSCT00000032451	ENSSSCG00000023848	C8orf46	chr4:74369541-74392471	2.33546	0.273639	3.09337	7.2392e-07	0.000109259
ENSSSCT00000027423	ENSSSCG00000021240	-	chr5:103467593-103468748	4348.24	557.26	2.96401	6.72909e-09	2.0152e-06
ENSSSCT00000015660	ENSSSCG00000014336	EGR1	chr2:146156064-146160020	17.5915	8.8642	0.988819	0.00110201	0.0385696
ENSSSCT00000008105	ENSSSCG00000007405	WFDC2	chr17:53365362-53366692	25.9752	0.750595	5.11296	2.19491e-10	9.88318e-08
ENSSSCT00000018048	ENSSSCG00000016578	FLNC	chr18:20855083-20884021	10.5926	2.77614	1.93191	6.67824e-11	3.39196e-08
ENSSSCT00000018049	ENSSSCG00000016579	CCDC136	chr18:20818949-20848924	1.4081	0.184286	2.93373	0.000377341	0.0175896
ENSSSCT00000034663	ENSSSCG00000005952	LRRC6	chr4:8570713-8644068	1.96547	0	inf	0.000136948	0.00807308
ENSSSCT00000032791	ENSSSCG00000012394	GJB1	chrX:64844645-64852108	1.32158	0	inf	0.000323375	0.0156604
ENSSSCT00000012862	ENSSSCG00000011751	TMEM212	chr13:119400407-119420051	8.41658	0.443579	4.24597	9.91218e-05	0.00621852
ENSSSCT00000028016	ENSSSCG00000022405	-	chr12:51863182-51882044	1.59223	0.176864	3.17033	2.86971e-05	0.00230627
ENSSSCT00000008600	ENSSSCG00000007850	ANKS4B	chr3:25642518-25654502	2.00869	0	inf	4.8792e-06	0.000554161
ENSSSCT00000022551	ENSSSCG00000024714	LRRC34	chr13:117186450-117203156	1.24925	0	inf	0.000874319	0.0326439
ENSSSCT00000016636	ENSSSCG00000015267	FMO2	chr9:70088605-70126311	3.67558	0.370065	3.31212	8.70067e-08	1.75923e-05
ENSSSCT00000025341	ENSSSCG00000023732	KLHDC7A	chr6:71268366-71270757	1.74056	0.201591	3.11005	4.76755e-05	0.00350738
ENSSSCT00000023581	ENSSSCG00000029363	TMEM252	chr1:248148191-248155279	1.07513	0.220868	2.28325	0.00114851	0.0397156
ENSSSCT00000018939	ENSSSCG00000017399	HSD17B1	chr12:20482053-20485181	124.66	65.4416	0.929718	0.00105358	0.0374527
ENSSSCT00000005448	ENSSSCG00000004937	SLC24A1	chr1:181204776-181300384	5.01202	1.81053	1.46898	0.000400667	0.0184869
ENSSSCT00000024238	ENSSSCG00000022459	-	JH118983.1:37201-39128	45.8458	20.053	1.19297	0.000202978	0.0109396
ENSSSCT00000016813	ENSSSCG00000015433	-	chr9:116718487-116747666	4.48185	0.498677	3.16792	3.62352e-07	6.11845e-05
ENSSSCT00000008182	ENSSSCG00000007476	KCNG1	chr17:58865300-58884884	3.47544	0.113357	4.93825	2.51133e-08	6.25262e-06
ENSSSCT00000013914	ENSSSCG00000012727	FMR1	chrX:137792660-137831725	5.01251	1.37377	1.86739	0.000480937	0.0210723
ENSSSCT00000015422	ENSSSCG00000014118	-	chr2:90747285-90761759	5.37786	1.28386	2.06655	0.000211471	0.0112352
ENSSSCT00000015421	ENSSSCG00000014117	-	chr2:90502274-90549368	3.12306	0.75959	2.03967	6.90288e-05	0.00464255
ENSSSCT00000015425	ENSSSCG00000014121	ZFYVE16	chr2:90895540-90953249	18.1324	7.46118	1.2811	1.2532e-05	0.00119287
ENSSSCT00000031700	ENSSSCG00000010281	PSAP	chr14:80625272-80660663	193.542	95.4701	1.01953	0.00106386	0.0377076
ENSSSCT00000032249	ENSSSCG00000030368	HSP70.2	GL896522.1:2-1799	124.186	55.3654	1.16544	3.21398e-05	0.00252896
ENSSSCT00000027547	ENSSSCG00000025931	-	GL895203.1:2792-4629	8.96485	0.33416	4.74567	1.09222e-05	0.00108181
ENSSSCT00000019506	ENSSSCG00000017923	ALOX15	chr12:54502073-54510831	2.447	0.271728	3.17078	1.16527e-06	0.000164404
ENSSSCT00000008688	ENSSSCG00000007927	PPL	chr3:38466496-38516974	1.29923	0.120065	3.43577	2.86577e-07	4.99849e-05
ENSSSCT00000011289	ENSSSCG00000010313	-	chr14:82826611-82938103	12.7794	1.72985	2.8851	4.30767e-14	7.15714e-11
ENSSSCT00000028518	ENSSSCG00000003371	GPR153	chr6:62038202-62100547	1.1755	0	inf	0.000802317	0.0307784
ENSSSCT00000031739	ENSSSCG00000025209	KIAA1328	chr6:113405282-113411496	1059.21	326.367	1.69842	4.66574e-08	1.02999e-05
ENSSSCT00000035504	ENSSSCG00000013651	-	chr2:69431299-69556700	6.2004	0	inf	0.00109003	0.0382984
ENSSSCT00000031995	ENSSSCG00000027407	MYH14	chr6:50894418-51049578	0.783063	0.200096	1.96844	0.00157875	0.0497189
ENSSSCT00000031996	ENSSSCG00000026558	-	chr6:5583398-5823425	68.1658	14.9029	2.19345	2.76416e-07	4.84789e-05
ENSSSCT00000031991	ENSSSCG00000023834	-	chr1:50284979-50290956	4.85067	0.293458	4.04696	3.3767e-07	5.71689e-05
ENSSSCT00000018284	ENSSSCG00000016795	-	chr16:6829356-6866653	147.153	70.2561	1.06662	0.000143444	0.00836283
ENSSSCT00000026389	ENSSSCG00000021600	-	chr8:54512170-54563745	26.079	3.29692	2.9837	5.21583e-13	6.03112e-10
ENSSSCT00000029834	ENSSSCG00000025652	CDH1	GL895865.1:35226-45106	10.4092	1.68947	2.62322	1.57201e-06	0.000209235
ENSSSCT00000014779	ENSSSCG00000013532	-	chr2:73688679-73690469	4.60604	0.374577	3.62019	1.47184e-06	0.000199747
ENSSSCT00000030807	ENSSSCG00000027936	-	JH118785.1:8571-25962	2.87592	0.634354	2.18066	0.000510443	0.0219861
ENSSSCT00000007271	ENSSSCG00000006635	SEMA6C	chr4:107360079-107372653	3.41933	1.15679	1.56359	0.000847447	0.0319689
ENSSSCT00000000722	ENSSSCG00000000666	MFAP5	chr5:65575790-65589682	63.5266	4.39937	3.85199	1.01649e-07	2.01674e-05
ENSSSCT00000035903	ENSSSCG00000029830	RPL8	chr4:200004-209523	553.591	282.417	0.970994	0.000662664	0.0266109
ENSSSCT00000006838	ENSSSCG00000006240	FAM110B	chr4:81523049-81524165	2.36454	7.64316	-1.69261	0.00111902	0.0390144
ENSSSCT00000025956	ENSSSCG00000023719	IFT20	chr12:46483935-46601915	25.2324	55.5108	-1.13749	0.000114519	0.00701806
ENSSSCT00000024555	ENSSSCG00000029345	-	chr3:139866340-139870413	0	4.31933	#NAME?	1.96238e-05	0.00170437
ENSSSCT00000010022	ENSSSCG00000009152	SGMS2	chr8:122315431-122406939	7.42209	21.3205	-1.52234	6.65025e-08	1.3798e-05
ENSSSCT00000033918	ENSSSCG00000000530	FGD4	chr5:44866168-45014262	10.2566	25.7404	-1.32748	0.000431136	0.0195378
ENSSSCT00000011944	ENSSSCG00000010914	NAV1	chr10:28617880-28632971	0.475053	2.27095	-2.25714	1.93765e-05	0.00169088
ENSSSCT00000027475	ENSSSCG00000025206	RNF19B	chr6:83253109-83277474	15.7326	34.5072	-1.13314	7.65101e-05	0.00501813
ENSSSCT00000011522	ENSSSCG00000010532	-	chr14:118983459-119000701	13.1334	37.3655	-1.50846	7.03024e-08	1.44241e-05
ENSSSCT00000015416	ENSSSCG00000014113	HOMER1	chr2:89844359-89996126	6.81637	16.2033	-1.24922	2.60764e-05	0.0021473
ENSSSCT00000025413	ENSSSCG00000016848	EGFLAM	chr16:24682028-24902072	0	0.853789	#NAME?	0.00124766	0.0418733
ENSSSCT00000004678	ENSSSCG00000004233	SMPDL3A	chr1:44076442-44094651	21.5637	57.6778	-1.41941	1.23783e-06	0.000172343
ENSSSCT00000005925	ENSSSCG00000005385	NR4A3	chr1:269817144-269852707	1.44405	3.68979	-1.35341	0.000468679	0.020707
ENSSSCT00000034774	ENSSSCG00000030849	RPL39	chrX:113430784-113434238	1.66203	347.328	-7.70721	2.44249e-15	6.4613e-12
ENSSSCT00000019166	ENSSSCG00000017605	MMD	chr12:32362123-32389071	43.0157	107.073	-1.31566	1.80273e-06	0.000236964
ENSSSCT00000033231	ENSSSCG00000006719	HSD3B1	chr4:111555565-111564192	140.514	311.479	-1.14842	0.000139349	0.00818557
ENSSSCT00000017258	ENSSSCG00000015850	DUSP4	chr15:62906028-62923416	39.8569	123.721	-1.63418	2.01427e-07	3.65383e-05
ENSSSCT00000007584	ENSSSCG00000006924	GBP1	chr4:139650957-139667272	14.4256	27.7127	-0.941923	0.000732474	0.0287277
ENSSSCT00000006055	ENSSSCG00000005506	MEGF9	chr1:292733748-292827889	13.2715	34.076	-1.36043	8.3885e-07	0.000123282
ENSSSCT00000028726	ENSSSCG00000026962	A4GALT	chr5:3561302-3562382	23.5872	52.0953	-1.14315	0.000219746	0.0115684
ENSSSCT00000012333	ENSSSCG00000011265	XIRP1	chr13:26127753-26137301	1.68061	3.78872	-1.17272	0.000974673	0.0354213
ENSSSCT00000018997	ENSSSCG00000017451	-	chr12:21754048-21754579	12.8833	59.2593	-2.20154	3.8562e-07	6.40907e-05
ENSSSCT00000014867	ENSSSCG00000013612	ACP5	GL896326.1:1999-3913	49.0391	145.056	-1.56461	2.29612e-08	5.84033e-06
ENSSSCT00000005701	ENSSSCG00000005171	-	chr1:227334092-227344720	59.9741	157.849	-1.39613	5.88581e-07	9.22678e-05
ENSSSCT00000007361	ENSSSCG00000006720	HAO2	chr4:111579208-111603426	10.0305	20.3256	-1.0189	0.00120017	0.0408236
ENSSSCT00000006575	ENSSSCG00000005992	SHAS2	chr4:18459353-18488950	1.51422	5.29838	-1.80698	0.000119843	0.00723949
ENSSSCT00000006577	ENSSSCG00000005994	SNTB1	chr4:19423080-19550493	17.7533	33.9326	-0.934585	0.00063817	0.0259224
ENSSSCT00000000941	ENSSSCG00000000862	-	chr5:86352831-86413187	14.8078	30.9585	-1.06398	0.000132436	0.00786554
ENSSSCT00000026254	ENSSSCG00000029075	-	chr14:134049151-134096543	8.35856	17.8484	-1.09447	0.00036398	0.0171812
ENSSSCT00000028915	ENSSSCG00000000862	-	chr5:86352831-86413187	16.981	38.3134	-1.17393	2.57436e-05	0.00212817
ENSSSCT00000030396	ENSSSCG00000029796	KBTBD11	chr15:38048837-38050850	0	1.83895	#NAME?	0.000720069	0.0283953
ENSSSCT00000033265	ENSSSCG00000012262	KDM6A	chrX:44567691-44704826	1.20091	3.70314	-1.62462	0.000601616	0.0248834
ENSSSCT00000023448	ENSSSCG00000022486	CBLB	chr13:162677244-162892743	6.88095	13.9109	-1.01553	0.000301557	0.014853
ENSSSCT00000023443	ENSSSCG00000016548	PODXL	chr18:18531184-18581935	4.79899	9.87775	-1.04145	0.000641221	0.0260131
ENSSSCT00000029342	ENSSSCG00000026749	-	GL892718.2:6382-13103	25.1518	70.8284	-1.49367	1.91815e-07	3.49947e-05
ENSSSCT00000016279	ENSSSCG00000014923	RAB38	chr9:23798575-23863119	0.604994	2.66801	-2.14077	0.00156189	0.0493347
ENSSSCT00000005998	ENSSSCG00000005453	TXN	chr1:282027081-282076574	1540.56	2969.88	-0.946948	0.00130417	0.0431702
ENSSSCT00000017465	ENSSSCG00000016040	-	chr15:104976731-104996115	85.6386	171.034	-0.997947	0.000374825	0.0175109
ENSSSCT00000004920	ENSSSCG00000004454	ME1	chr1:93076562-93242655	27.5989	60.2234	-1.12572	5.66797e-05	0.00399326
ENSSSCT00000006279	ENSSSCG00000005710	LAMC3	chr1:304979407-305098340	0.501335	2.45842	-2.29388	8.50433e-06	0.000883685
ENSSSCT00000019676	ENSSSCG00000018081	ATP6	chrMT:8958-10583	1021.2	2338.69	-1.19543	0.000838795	0.0317746
ENSSSCT00000014793	ENSSSCG00000013545	TUBB4A	chr2:73063906-73085299	0.913364	3.12414	-1.7742	0.000904435	0.033482
ENSSSCT00000000701	ENSSSCG00000000648	CLEC7A	chr5:64542868-64556408	0	1.30772	#NAME?	0.00128077	0.0427391
ENSSSCT00000034845	ENSSSCG00000012772	BCAP31	chrX:142021545-142065526	7.80874	22.9093	-1.55277	0.000773149	0.0298761
ENSSSCT00000033450	ENSSSCG00000012269	CDK16	chrX:46764007-46776684	0	1.89268	#NAME?	0.00151823	0.0482438
ENSSSCT00000007358	ENSSSCG00000006717	PHGDH	chr4:111436316-111468486	13.4698	30.4221	-1.17539	0.000101951	0.00637081
ENSSSCT00000014468	ENSSSCG00000013248	LRP4	chr2:16981001-17020205	8.6004	22.8207	-1.40786	3.80123e-07	6.34176e-05
ENSSSCT00000034371	ENSSSCG00000012481	TSPAN6	chrX:90165030-90174389	0	4.2706	#NAME?	0.00128308	0.0427391
ENSSSCT00000024539	ENSSSCG00000025344	PHC2	chr6:83589104-83599962	6.45494	14.9817	-1.21472	0.000585642	0.0243336
ENSSSCT00000033729	ENSSSCG00000009002	TLR2	chr8:79824540-79834592	5.53592	15.001	-1.43816	2.00303e-05	0.00172552
ENSSSCT00000009461	ENSSSCG00000008648	RSAD2	chr3:137667911-137683557	4.51669	16.8977	-1.90349	2.16991e-06	0.000277193
ENSSSCT00000024901	ENSSSCG00000022789	-	chr13:183834655-183877970	25.3216	63.9162	-1.33581	1.94678e-05	0.00169546
ENSSSCT00000024902	ENSSSCG00000025930	-	chr12:35302087-35316440	0.639844	2.74444	-2.10072	5.63468e-05	0.00397489
ENSSSCT00000025430	ENSSSCG00000027157	-	chr15:104872678-104894789	62.68	130.427	-1.05717	0.000744063	0.0290349
ENSSSCT00000025437	ENSSSCG00000023806	LRRN1	chr13:66656172-67031248	3.68532	8.84649	-1.26331	0.00116752	0.0401256
ENSSSCT00000027557	ENSSSCG00000026959	NPAT	chr9:40632922-40676082	0	1.94151	#NAME?	7.14016e-05	0.00475679
ENSSSCT00000003402	ENSSSCG00000003065	PLAUR	chr6:46349480-46380651	9.65109	23.8957	-1.30799	0.000220785	0.0116135
ENSSSCT00000023043	ENSSSCG00000025551	-	chr7:46279207-46417272	10.395	24.2212	-1.22038	1.09477e-05	0.00108264
ENSSSCT00000012397	ENSSSCG00000011322	CCR1	chr13:32323641-32330286	6.89273	17.0945	-1.31038	2.41486e-05	0.00201468
ENSSSCT00000003977	ENSSSCG00000003582	SMPDL3B	chr6:78600671-78624777	6.57247	18.1287	-1.46377	1.56186e-05	0.00141659
ENSSSCT00000000561	ENSSSCG00000000519	GLIPR1	chr5:42330431-42385154	20.1264	39.3284	-0.966482	0.000481079	0.0210723
ENSSSCT00000004833	ENSSSCG00000004371	AIM1	chr1:81996298-82061659	0	0.805557	#NAME?	0.000238891	0.0123208
ENSSSCT00000004831	ENSSSCG00000004370	ATG5	JH118901.1:353757-449236	5.31715	17.8972	-1.75101	0.000305505	0.0149777
ENSSSCT00000032281	ENSSSCG00000021555	-	GL895228.2:2982-26454	15.1562	35.6987	-1.23597	4.20411e-05	0.00314758
ENSSSCT00000012778	ENSSSCG00000011673	-	chr13:90213893-90214971	6.04889	22.4163	-1.8898	3.31138e-06	0.000404301
ENSSSCT00000036466	ENSSSCG00000000712	VWF	chr5:67005339-67078256	0	1.08238	#NAME?	0.000144367	0.00838584
ENSSSCT00000013161	ENSSSCG00000012029	BACH1	chr13:203134182-203148106	18.9013	35.1084	-0.893334	0.00153935	0.0487682
ENSSSCT00000034800	ENSSSCG00000030026	SORCS1	chr14:127831521-128359508	0	1.36172	#NAME?	0.000119341	0.00723672
ENSSSCT00000034415	ENSSSCG00000015716	MARCO	chr15:28139545-28177787	0.978776	4.20178	-2.10195	0.000888933	0.0330624
ENSSSCT00000027894	ENSSSCG00000028204	-	chr9:50918842-50924246	0.730812	4.10486	-2.48976	1.23155e-05	0.00117756
ENSSSCT00000025632	ENSSSCG00000020756	FAM101A	chr14:30518902-30536047	11.2642	24.1959	-1.10301	0.000307465	0.0150506
ENSSSCT00000013747	ENSSSCG00000012572	COL4A5	chrX:103660403-103682903	62.0269	136.688	-1.13992	3.38134e-05	0.00264382
ENSSSCT00000036499	ENSSSCG00000031023	CD24	chr1:82268708-82273291	103.683	266.351	-1.36115	4.13277e-06	0.000485
ENSSSCT00000012833	ENSSSCG00000011723	MME	chr13:103030829-103128284	5.23089	20.4219	-1.96499	4.89364e-08	1.06767e-05
ENSSSCT00000014572	ENSSSCG00000013344	ANO5	chr2:40382283-40466246	4.17038	9.55776	-1.19649	0.000113902	0.00700052
ENSSSCT00000034512	ENSSSCG00000009219	IBSP	chr8:140438439-140452173	130.843	271.22	-1.05163	0.000316805	0.0153892
ENSSSCT00000027582	ENSSSCG00000026081	-	chr15:104665230-104669898	40.5774	92.0925	-1.18241	3.21452e-05	0.00252896
ENSSSCT00000016436	ENSSSCG00000015070	APOA1	chr9:49288614-49290784	6.76013	47.4113	-2.81011	1.02578e-10	4.97143e-08
ENSSSCT00000012438	ENSSSCG00000011361	SLC26A6	chr13:34582658-34594185	31.598	60.466	-0.93629	0.000625129	0.0255398
ENSSSCT00000025489	ENSSSCG00000022099	TP53INP2	chr17:43299839-43308847	8.21534	32.6928	-1.99258	2.915e-12	2.53521e-09
ENSSSCT00000019540	ENSSSCG00000017956	CD68	chr12:55296984-55299524	9.65984	24.7728	-1.35868	0.000129751	0.00774603
ENSSSCT00000019290	ENSSSCG00000017723	CCL2	chr12:42514167-42516128	9.80967	28.3587	-1.53152	0.000176443	0.00980096
ENSSSCT00000000142	ENSSSCG00000000136	CSF2RB	chr5:8415794-8440059	2.70848	5.80597	-1.10005	0.000970034	0.0353191
ENSSSCT00000011332	ENSSSCG00000010351	CCSER2	chr14:92348950-92533125	10.0344	19.4574	-0.955361	0.000559033	0.0235361
ENSSSCT00000007511	ENSSSCG00000006858	OLFM3	chr4:128207124-128249603	3.36829	9.02171	-1.42138	2.86921e-05	0.00230627
ENSSSCT00000026459	ENSSSCG00000029186	SEZ6L2	chr3:18470477-18492518	0.358672	1.45471	-2.01999	0.000354568	0.0168487
ENSSSCT00000001002	ENSSSCG00000000918	EPYC	chr5:96320059-96355948	1.75976	6.56306	-1.89899	0.00115844	0.0400126
ENSSSCT00000016988	ENSSSCG00000015595	ATF3	chr9:143690555-143703872	11.8271	31.3657	-1.4071	3.82452e-06	0.000452169
ENSSSCT00000000530	ENSSSCG00000000492	LYZ	chr5:36179189-36185575	128.283	246.268	-0.9409	0.000885398	0.0329502
ENSSSCT00000013131	ENSSSCG00000012000	-	chr13:184018401-184112967	45.704	88.364	-0.951139	0.000909024	0.0335736
ENSSSCT00000029764	ENSSSCG00000027982	ISG15	GL895967.2:58448-59139	12.4015	56.0089	-2.17514	2.84264e-08	6.83624e-06
ENSSSCT00000026802	ENSSSCG00000027130	TNFRSF12A	chr3:40522156-40533352	79.1138	159.968	-1.01578	0.00048404	0.0211211
ENSSSCT00000009205	ENSSSCG00000008408	RTN4	chr3:90961307-91258248	96.6198	192.617	-0.995345	0.000448276	0.0200285
ENSSSCT00000033746	ENSSSCG00000009668	CLU	chr14:12516643-12528349	96.8694	218.787	-1.17542	0.000533947	0.0227363
ENSSSCT00000018656	ENSSSCG00000017137	METRNL	chr12:554561-562054	34.1967	71.0014	-1.05399	0.000871285	0.0326439
ENSSSCT00000034678	ENSSSCG00000005215	JAK2	chr1:242696462-242786177	3.13722	8.88775	-1.50233	7.38253e-05	0.00486859
ENSSSCT00000018316	ENSSSCG00000016823	-	chr16:20792524-20819543	6.53857	21.2339	-1.69932	3.03384e-08	7.21407e-06
ENSSSCT00000030171	ENSSSCG00000008624	-	chr3:133660274-133741130	1.93258	6.8294	-1.82123	2.73319e-07	4.80685e-05
ENSSSCT00000003853	ENSSSCG00000003467	SLC25A34	chr6:69390943-69394891	1.6784	6.427	-1.93706	7.59894e-05	0.00498913
ENSSSCT00000033666	ENSSSCG00000012784	SSR4	chrX:142093231-142106233	2.88338	19.4754	-2.75582	0.000275293	0.0138167
ENSSSCT00000015517	ENSSSCG00000014202	STARD4	chr2:120830522-120845745	41.321	97.4319	-1.23752	1.24315e-05	0.00118686
ENSSSCT00000018391	ENSSSCG00000016887	ITGA2	chr16:34164829-34265784	0.421483	2.03085	-2.26853	0.000229922	0.0119456
ENSSSCT00000033796	ENSSSCG00000012277	TIMP1	chrX:47336628-47400702	4.4863	28.6903	-2.67697	2.52985e-06	0.000316177
ENSSSCT00000029842	ENSSSCG00000027221	-	chr15:105176050-105198202	49.5463	102.36	-1.0468	0.000494358	0.0214601
ENSSSCT00000001551	ENSSSCG00000001414	CSNK2B	chr7:27466071-27474873	4.25642	14.8167	-1.79952	0.00113566	0.0394564
ENSSSCT00000013239	ENSSSCG00000012104	SHROOM2	chrX:6595888-6801781	0.46184	1.68907	-1.87076	0.000186607	0.0102487
ENSSSCT00000003046	ENSSSCG00000002749	HP	chr6:14643377-14648241	189.645	642.546	-1.7605	4.7043e-08	1.03298e-05
ENSSSCT00000035002	ENSSSCG00000012262	KDM6A	chrX:44567691-44704826	0	4.42185	#NAME?	0.00116193	0.0400662
ENSSSCT00000001744	ENSSSCG00000001565	-	GL893630.2:37126-44847	8.1993	21.6564	-1.40122	0.000561122	0.0236084
ENSSSCT00000005625	ENSSSCG00000005103	DET1	chr1:212696361-212718000	0	1.1787	#NAME?	0.00150589	0.0480199
ENSSSCT00000034386	ENSSSCG00000001410	BAG6	chr7:27478636-27495106	0	1.61616	#NAME?	7.92164e-05	0.00515833
ENSSSCT00000017293	ENSSSCG00000015882	BAZ2B	chr15:73484138-73618436	0	3.14794	#NAME?	0.000449275	0.0200591
ENSSSCT00000033711	ENSSSCG00000012118	TLR8	chrX:10500861-10512940	0.531973	2.23805	-2.07282	0.000469942	0.0207196
ENSSSCT00000002063	ENSSSCG00000001841	RHCG	chr7:60021998-60039452	0.463813	3.51358	-2.92133	5.42485e-07	8.56762e-05
ENSSSCT00000026292	ENSSSCG00000022236	-	chr9:7507498-7511916	149.248	301.003	-1.01207	0.000371789	0.017442
ENSSSCT00000035207	ENSSSCG00000007079	FLRT3	chr17:25670663-25684519	2.22625	5.51317	-1.30827	0.000651428	0.0263262
ENSSSCT00000023953	ENSSSCG00000023708	ERO1B	chr14:59032169-59054154	112.516	214.16	-0.928556	0.0008041	0.0308282
ENSSSCT00000013571	ENSSSCG00000012411	PHKA1	chrX:66183817-66288138	0.463641	2.04969	-2.14433	9.65515e-05	0.00608375
ENSSSCT00000001985	ENSSSCG00000001770	CTSH	chr7:53623061-53644262	6.22192	15.9974	-1.36241	0.0012288	0.0414093
ENSSSCT00000032891	ENSSSCG00000016887	ITGA2	chr16:34164829-34265784	4.63209	10.6565	-1.202	3.11811e-05	0.00247148
ENSSSCT00000019230	ENSSSCG00000017666	CH242-205G24.7	chr12:37171796-37193913	48.4833	112.979	-1.2205	3.86839e-05	0.00293079
ENSSSCT00000017980	ENSSSCG00000016513	KIAA1549	chr18:11203163-11291469	0.0670847	0.924032	-3.78389	0.000127521	0.00763068
ENSSSCT00000002723	ENSSSCG00000002453	-	GL892848.2:184539-204115	13.0275	32.2934	-1.30968	0.000112929	0.00695889
ENSSSCT00000031971	ENSSSCG00000008359	RAB1B	chr3:80675212-80706547	0.461148	9.01417	-4.28889	1.60395e-06	0.000212595
ENSSSCT00000031974	ENSSSCG00000023684	-	chr6:26353887-26411796	59.6696	180.649	-1.59812	1.28226e-05	0.00121325
ENSSSCT00000029306	ENSSSCG00000025005	B4GALT6	chr6:108153076-108219519	9.52991	22.252	-1.2234	1.35654e-05	0.00126469
ENSSSCT00000012990	ENSSSCG00000011876	DTX3L	chr13:147573123-147581225	0	2.36359	#NAME?	0.000119787	0.00723949
ENSSSCT00000024099	ENSSSCG00000023467	-	chr7:134354731-134365476	13.1519	36.6672	-1.47922	0.000269211	0.0135328
ENSSSCT00000026008	ENSSSCG00000025567	-	chr3:5013716-5021792	45.5395	92.1032	-1.01613	0.000215085	0.0113891
ENSSSCT00000026579	ENSSSCG00000011467	DENND6A	chr13:43385840-43444265	3.11964	7.06346	-1.179	0.000483432	0.0211211
ENSSSCT00000033226	ENSSSCG00000012362	ARHGEF9	chrX:56579849-56756533	0	1.24743	#NAME?	0.00113791	0.0394564
ENSSSCT00000027525	ENSSSCG00000002296	RDH11	chr7:97722349-97759848	152.018	321.649	-1.08124	0.00151725	0.0482438
ENSSSCT00000014612	ENSSSCG00000013378	ABCC8	chr2:44725268-44812585	0.485213	1.60901	-1.72948	0.000575455	0.0240703
ENSSSCT00000003114	ENSSSCG00000002814	ADGRG3	chr6:17679846-17699546	0.580449	2.03136	-1.8072	0.00116451	0.0400783
ENSSSCT00000022580	ENSSSCG00000030042	SBNO2	chr2:77676871-77694114	5.34744	10.3105	-0.947194	0.00157962	0.0497216
ENSSSCT00000029707	ENSSSCG00000029574	-	GL895728.2:1606-8594	1.13351	6.47055	-2.51309	1.93885e-05	0.00169088
ENSSSCT00000007487	ENSSSCG00000006836	KIAA1324	chr4:121378121-121448363	19.8622	41.634	-1.06774	0.000103122	0.00643137
ENSSSCT00000027416	ENSSSCG00000014121	ZFYVE16	chr2:90895540-90953249	3.74771	11.8325	-1.65868	1.54483e-07	2.90177e-05
ENSSSCT00000002557	ENSSSCG00000002296	RDH11	chr7:97722349-97759848	35.2643	104.219	-1.56333	4.27164e-08	9.58312e-06
ENSSSCT00000002558	ENSSSCG00000002297	RDH12	chr7:97788543-97803846	10.8508	48.0907	-2.14795	2.5091e-14	4.55144e-11
ENSSSCT00000006928	ENSSSCG00000006321	FAM78B	chr4:92281606-92433219	4.4168	12.8391	-1.53947	0.000218869	0.0115317
ENSSSCT00000014366	ENSSSCG00000013146	FAM111A	chr2:11866313-11871396	18.723	39.2803	-1.06899	0.000248608	0.0127084
ENSSSCT00000010122	ENSSSCG00000009242	LIN54	chr8:144625739-144693405	2.70901	6.60567	-1.28594	0.000603849	0.0249138
ENSSSCT00000003939	ENSSSCG00000003546	-	chr6:75996930-75997332	5.1521	101.242	-4.2965	6.94556e-13	7.60287e-10
ENSSSCT00000036076	ENSSSCG00000012229	CYBB	chrX:37303173-37392877	3.78604	11.0042	-1.5393	0.000430169	0.0195078
ENSSSCT00000013393	ENSSSCG00000012247	ATP6AP2	chrX:40369353-40398502	6.03947	18.5712	-1.62057	8.80547e-06	0.000911991
ENSSSCT00000024662	ENSSSCG00000023032	SCG2	GL894571.1:2662-4960	2.09577	7.93544	-1.92083	5.18021e-06	0.000578008
ENSSSCT00000036133	ENSSSCG00000013638	ILF3	chr2:69799234-69826851	0.603287	6.06947	-3.33065	6.33768e-05	0.00429886
ENSSSCT00000005396	ENSSSCG00000004890	SERPINB2	chr1:175502732-175517283	0.307686	8.54943	-4.7963	2.34479e-13	2.86285e-10
ENSSSCT00000022397	ENSSSCG00000026196	-	chr8:139674388-139737897	16.3131	35.9913	-1.14162	3.83475e-05	0.00292274
ENSSSCT00000013861	ENSSSCG00000012679	GPC4	chrX:125341063-125380842	15.1304	28.1322	-0.894771	0.00133162	0.0438914
ENSSSCT00000010777	ENSSSCG00000009833	SH2B3	chr14:34618776-34660161	11.5678	21.4778	-0.892732	0.00120323	0.0408731
ENSSSCT00000024378	ENSSSCG00000027206	PARD6B	chr17:58583133-58653888	12.9302	42.788	-1.72647	6.38719e-10	2.45767e-07
ENSSSCT00000011620	ENSSSCG00000010624	DUSP5	chr14:131791152-131804261	3.41286	21.6544	-2.66561	7.52731e-14	1.08614e-10
ENSSSCT00000010578	ENSSSCG00000009649	NEFL	chr14:10087369-10093095	0.310367	1.73539	-2.48321	2.39052e-05	0.00200174
ENSSSCT00000010576	ENSSSCG00000009648	NEFM	chr14:10117157-10122555	0.681923	3.98284	-2.54612	2.08972e-07	3.77989e-05
ENSSSCT00000030451	ENSSSCG00000027410	CBFA2T2	chr17:41984967-42071429	0.0358489	3.94311	-6.78126	3.9019e-10	1.59824e-07
ENSSSCT00000008101	ENSSSCG00000007401	SDC4	chr17:53254491-53270748	53.4996	106.684	-0.99574	0.000645254	0.0261214
ENSSSCT00000005762	ENSSSCG00000005228	KCNV2	chr1:244923141-244935596	0.118497	1.60059	-3.75568	5.81048e-05	0.00404497
ENSSSCT00000035226	ENSSSCG00000012130	FANCB	chrX:12339389-12361867	0	1.5719	#NAME?	6.10616e-05	0.00419107
ENSSSCT00000007647	ENSSSCG00000006982	ZDHHC2	chr17:5281875-5322408	13.7939	29.0368	-1.07385	0.000105607	0.00656058
ENSSSCT00000016637	ENSSSCG00000015268	FMO1	chr9:70137791-70171698	152.66	425.98	-1.48046	7.9295e-06	0.000830753
ENSSSCT00000023746	ENSSSCG00000023298	-	chr17:39335393-39342318	61.3636	119.356	-0.959814	0.000688219	0.0273431
ENSSSCT00000017800	ENSSSCG00000016345	-	chr15:153160291-153194892	0.052949	4.21146	-6.31357	6.05716e-06	0.000666488
ENSSSCT00000011516	ENSSSCG00000010526	AVPI1	chr14:118548267-118556353	41.6998	82.4938	-0.984244	0.000338898	0.016251
ENSSSCT00000030881	ENSSSCG00000024087	-	GL893554.2:81971-112317	0.196567	1.00944	-2.36046	5.14225e-05	0.00371418
ENSSSCT00000011287	ENSSSCG00000010312	PLAU	chr14:82755601-82761495	13.2648	28.802	-1.11856	0.000131426	0.00782751
ENSSSCT00000009643	ENSSSCG00000008813	CORIN	chr8:39505993-39782313	2.41542	5.37147	-1.15304	0.00159249	0.0498952
ENSSSCT00000010831	ENSSSCG00000009881	OAS2	chr14:41196285-41208970	6.49666	14.1014	-1.11807	0.000436371	0.0196906
ENSSSCT00000017880	ENSSSCG00000016420	INSIG1	chr18:2896504-3019640	75.866	217.633	-1.52037	8.64938e-07	0.00012653
ENSSSCT00000013209	ENSSSCG00000012076	MX2	chr13:215028063-215059085	7.02117	17.039	-1.27906	5.53517e-05	0.00392183
ENSSSCT00000032543	ENSSSCG00000023333	-	chr1:308197100-308203079	3.215	9.72373	-1.59669	0.000321397	0.0156003
