# Supplementary material for: Systematic Analysis of Long Non-Coding RNAs and mRNAs in the Ovaries of Duroc Pigs During Different Follicular Stages Using RNA Sequencing
Source: Int J Mol Sci. 2018 Jun 11;19(6):1722. doi: 10.3390/ijms19061722 (PMC6032137; doi:10.3390/ijms19061722)
Supplement: Supplementary file 1 [file ijms-19-01722-s001.zip › Supplementary Table S4.xlsx]

## Sheet: Table S4
Systematic analysis of long non-coding RNAs and mRNAs in the ovaries of Duroc pigs during different follicular stages using RNA sequencing Yi Liu, Mengxun Li, Xinwen Bo, Li Tao, Lipeng Ma, Tenjiao Zhai, Tao Huang
Supplementary Table S4. The information of differentially expressed 48 lncRNA transcripts (30 up-regulated and 18 down-regulated) and 430 mRNA transcripts (260 up-regulated and 170 down-regulated) in the DOVADAY0 and DOVADAY4 comparison group.
transcript_id	gene_id	gene_name	gene_location	DOVADAY4_FPKM	DOVADAY0_FPKM	log2(foldchange)	pvalue	qvalue
ALDBSSCT0000000988	ALDBSSCG0000000606	-	chr1:256190559-256198757	48.834	8.81133	2.47045	0.000315415	0.0153451
ALDBSSCT0000011300	ALDBSSCG0000006863	-	chr9:117706826-117729351	769.063	278.314	1.46639	0.0015874	0.0498183
LNC_000154	XLOC_011021	-	chr1:39601899-39602385	231.498	58.6696	1.98032	0.00082276	0.0313355
ALDBSSCT0000001721	ALDBSSCG0000001039	-	chr11:19591307-19596470	245.978	100.6	1.28991	0.00106913	0.0378152
LNC_000212	XLOC_015423	-	chr11:19543476-19563631	2.31246	0.301237	2.94046	1.48341e-05	0.00136295
LNC_000024	XLOC_000711	-	GL892881.1:9154-20279	72.7765	5.88099	3.62934	0.00146213	0.0472172
ALDBSSCT0000008848	ALDBSSCG0000005406	-	chr6:48452343-48455032	5.61472	1.12121	2.32416	0.000769612	0.0297938
LNC_000604	XLOC_055029	-	chr7:119467461-119473712	0.726268	0.0330157	4.45928	3.67929e-05	0.00282119
LNC_000108	XLOC_005767	-	GL896412.1:25077-25718	354.145	23.992	3.88372	4.93379e-05	0.00359222
LNC_000494	XLOC_042722	-	chr3:97670170-97685404	4.6951	0	inf	7.39012e-05	0.00486859
LNC_000517	XLOC_044773	-	chr4:14676925-14707038	3.14691	0	inf	0.00150983	0.0480731
LNC_000220	XLOC_016258	-	chr11:52192741-52195090	2.69305	0	inf	0.00150213	0.0479658
LNC_000464	XLOC_039351	-	chr2:143856229-143907415	86.2401	41.2527	1.06387	0.00107749	0.0379415
LNC_000076	XLOC_003450	-	GL894621.1:30737-31130	941.638	310.971	1.59839	0.000237091	0.0122579
ALDBSSCT0000011772	ALDBSSCG0000007136	-	chr9:148558386-148568813	22.064	9.5951	1.20132	9.0561e-05	0.00574963
ALDBSSCT0000011481	ALDBSSCG0000006989	-	chr9:40835707-40837691	3.42237	0.72547	2.23801	0.00155352	0.0491506
ALDBSSCT0000011155	ALDBSSCG0000006769	-	chr9:44883510-44886875	2.65888	0.445201	2.57829	0.000922212	0.0339422
ALDBSSCT0000001173	ALDBSSCG0000000726	-	chr10:29076621-29083257	34.5608	16.838	1.03742	0.000205245	0.0110057
LNC_000525	XLOC_045276	-	chr4:80758282-80906755	2.2216	0	inf	0.000199766	0.0108124
LNC_000527	XLOC_045295	-	chr4:82212018-82215590	3.41566	0.437634	2.96437	4.48105e-06	0.00051633
ALDBSSCT0000001352	ALDBSSCG0000000829	-	chr10:76375867-76390418	1.24068	0	inf	0.001331	0.0438914
LNC_000393	XLOC_032850	-	chr17:41941050-41966927	191.3	22.4521	3.09092	0.00050085	0.0216316
LNC_000454	XLOC_037469	-	chr2:155275903-155281259	25.8855	12.8471	1.0107	0.000388376	0.018051
LNC_000456	XLOC_038281	-	chr2:53248642-53249074	30.1397	0.931478	5.016	0.000855578	0.0322373
ALDBSSCT0000011771	ALDBSSCG0000007136	-	chr9:148558386-148568813	6.00148	1.31597	2.18919	6.68331e-06	0.00072409
ALDBSSCT0000002998	ALDBSSCG0000001798	-	chr13:207620782-207626020	0.938716	0.102615	3.19345	8.50405e-05	0.00547219
ALDBSSCT0000004553	ALDBSSCG0000002769	-	chr15:102503378-102522706	156.964	59.8015	1.39218	4.03027e-05	0.00303893
LNC_000171	XLOC_012284	-	chr1:200589506-200695217	686.354	140.852	2.28477	0.000756742	0.0294392
ALDBSSCT0000007044	ALDBSSCG0000004285	-	chr3:18344083-18354283	6.84054	0	inf	0.000360685	0.0170637
LNC_000238	XLOC_017935	-	chr12:24077015-24078089	78.7243	5.08975	3.95114	0.000437343	0.0197205
LNC_000535	XLOC_046382	-	chr5:15676475-15690510	0.461136	1.83797	-1.99485	0.000678877	0.0271077
ENSSSCT00000034907	ENSSSCG00000030790	TMP-CH242-74M17.6	chr7:24626855-24627344	0	735.804	#NAME?	5.42944e-13	6.06435e-10
ALDBSSCT0000003347	ALDBSSCG0000002013	-	chr13:160470293-160477475	0	1.06837	#NAME?	0.000334487	0.0160637
ENSSSCT00000004790	ENSSSCG00000004334	MAP3K7	chr1:65478904-65542600	0.6052	4.97728	-3.03987	1.80829e-05	0.00159898
LNC_000304	XLOC_024409	-	chr14:37833055-37849960	0	1.14323	#NAME?	0.000281651	0.014069
ALDBSSCT0000009954	ALDBSSCG0000006058	-	chr7:124299186-124352196	1.3361	3.83138	-1.51983	0.000760539	0.0295326
ALDBSSCT0000012035	ALDBSSCG0000007337	-	chrX:67151783-67178895	20.6218	42.8142	-1.05392	0.000911854	0.0336585
LNC_000386	XLOC_032394	-	chr16:75775735-75817423	0.506065	5.2824	-3.3838	1.47555e-06	0.000199747
ALDBSSCT0000009009	ALDBSSCG0000005505	-	chr6:94573666-94724597	10.3747	54.0733	-2.38185	2.3703e-05	0.00198795
LNC_000643	XLOC_058577	-	chr8:38812516-38844825	0	2.06882	#NAME?	0.00155374	0.0491506
LNC_000266	XLOC_020820	-	chr13:157485791-157501001	0.014673	0.817214	-5.79948	1.92746e-05	0.00168557
ALDBSSCT0000011472	ALDBSSCG0000006981	-	chr9:30909859-30917948	0.338747	1.36363	-2.00917	0.00116244	0.0400662
LNC_000617	XLOC_056479	-	chr7:89873026-89912996	0.442519	2.10964	-2.25318	0.000337158	0.0161798
LNC_000166	XLOC_011637	-	chr1:126367881-126374197	3.1675	15.6764	-2.30717	1.46378e-05	0.00134912
LNC_000286	XLOC_022688	-	chr13:91465607-91478421	0.316899	4.20111	-3.72867	3.95076e-06	0.000464499
ALDBSSCT0000011287	ALDBSSCG0000006854	-	chr9:102529748-102535957	99.0031	228.932	-1.20937	2.19551e-05	0.00185607
LNC_000235	XLOC_017706	-	chr12:8807274-8809264	0.260594	2.03728	-2.96677	0.000528893	0.0225727
ALDBSSCT0000001132	ALDBSSCG0000000703	-	chr10:14763408-14810188	0	0.921467	#NAME?	0.0013828	0.0451376
transcript_id	gene_id	gene_name	gene_location	DOVADAY4_FPKM	DOVADAY0_FPKM	log2(foldchange)	pvalue	qvalue
ENSSSCT00000008343	ENSSSCG00000007603	NPTX2	chr3:5732131-5740519	103.815	35.3792	1.55305	3.73964e-07	6.28111e-05
ENSSSCT00000028416	ENSSSCG00000003693	MYOM1	chr6:96482620-96620109	2.14721	0.390334	2.45968	6.30468e-05	0.00428104
ENSSSCT00000028650	ENSSSCG00000023288	-	JH118404.1:113923-119915	64.7769	31.6769	1.03205	0.000354812	0.0168487
ENSSSCT00000035987	ENSSSCG00000030778	MFI2	chr13:142726243-142751987	3.43498	0.267216	3.68422	0.00159411	0.0499054
ENSSSCT00000022722	ENSSSCG00000001370	-	GL895526.2:9563-22461	9.50348	1.72729	2.45995	0.000143726	0.0083639
ENSSSCT00000032295	ENSSSCG00000005022	NIN	chr1:200774576-200871792	0.774536	0	inf	7.09063e-05	0.00472875
ENSSSCT00000026116	ENSSSCG00000025507	RPL27	chr12:19987052-19989521	796.936	381.858	1.06143	0.000313797	0.0153016
ENSSSCT00000026111	ENSSSCG00000021865	INHBA	chr18:57997857-58009109	213.631	74.514	1.51954	2.38125e-07	4.23482e-05
ENSSSCT00000033911	ENSSSCG00000013297	CD44	chr2:28156391-28374853	16.3672	6.89039	1.24815	0.000457594	0.020302
ENSSSCT00000011497	ENSSSCG00000010507	TLL2	chr14:117454644-117514823	3.82376	1.03093	1.89105	0.00017896	0.00989723
ENSSSCT00000028373	ENSSSCG00000030010	RPL36	chr2:73808881-73810492	3428.37	1603.93	1.09591	0.000424036	0.0192987
ENSSSCT00000009694	ENSSSCG00000008854	CPE	chr8:45395480-45618352	95.7364	36.1363	1.40562	1.62933e-06	0.000215062
ENSSSCT00000006527	ENSSSCG00000005944	NDRG1	chr4:7894533-7931354	92.7819	46.0451	1.0108	0.000496537	0.0214795
ENSSSCT00000034901	ENSSSCG00000011723	MME	chr13:103030829-103128284	94.2378	48.6858	0.952804	0.00102165	0.0366668
ENSSSCT00000013798	ENSSSCG00000012619	2018-09-06	chrX:113558631-113632317	1.89854	0	inf	5.70097e-05	0.00400662
ENSSSCT00000031966	ENSSSCG00000022830	KANSL1L	chr15:124563201-124740175	28.2007	13.8311	1.02781	0.000478053	0.0209926
ENSSSCT00000008845	ENSSSCG00000008072	ASPN	chr3:43260711-43602320	19.6909	6.55043	1.58787	1.51294e-06	0.000204373
ENSSSCT00000014565	ENSSSCG00000013337	-	chr2:35864280-35883381	8.94042	2.50003	1.83839	0.000684927	0.0272881
ENSSSCT00000006174	ENSSSCG00000005615	PTRH1	chr1:302105645-302107569	14.9059	3.68278	2.01702	0.000133158	0.00789364
ENSSSCT00000027904	ENSSSCG00000021654	ZNF641	chr5:81900483-81911075	0.776754	0	inf	0.000229119	0.011943
ENSSSCT00000007283	ENSSSCG00000006647	CTSK	chr4:107641166-107653106	197.096	99.3835	0.987818	0.000535045	0.0227677
ENSSSCT00000006902	ENSSSCG00000006297	DPT	chr4:89969323-90001121	41.4267	11.6101	1.83518	6.27169e-09	1.91013e-06
ENSSSCT00000018119	ENSSSCG00000016641	-	chr18:35200926-35201106	7264.53	468.071	3.95607	2.91863e-08	6.99095e-06
ENSSSCT00000035556	ENSSSCG00000030849	RPL39	chrX:113430784-113434238	2806.52	1191.98	1.23542	0.000841732	0.0318668
ENSSSCT00000016405	ENSSSCG00000015039	BCO2	chr9:44724878-44767958	6.88505	2.23209	1.62507	0.000477084	0.0209907
ENSSSCT00000023689	ENSSSCG00000030168	CYP19A1	chr1:133903978-133936093	40.2755	14.637	1.46028	1.09911e-05	0.00108356
ENSSSCT00000029103	ENSSSCG00000027830	-	JH118654.1:104053-110261	43.4114	2.23712	4.27836	4.62157e-11	2.5269e-08
ENSSSCT00000032220	ENSSSCG00000028414	MINOS1	chr6:72084474-72119250	197.701	78.4259	1.33392	2.34709e-06	0.000296251
ENSSSCT00000034096	ENSSSCG00000011630	ACKR4	chr13:81305208-81403413	9.68572	1.98564	2.28626	1.97284e-06	0.000256668
ENSSSCT00000029805	ENSSSCG00000027544	-	GL894842.1:1102-13375	354.26	111.26	1.67087	1.80721e-08	4.76092e-06
ENSSSCT00000031064	ENSSSCG00000021556	BBOX1	GL893210.2:6917-56507	8.00068	2.22535	1.84609	0.00100685	0.0363114
ENSSSCT00000036092	ENSSSCG00000014372	IK	chr2:148305086-148328487	51.4914	24.1696	1.09113	0.00017865	0.00989316
ENSSSCT00000009083	ENSSSCG00000008294	ACTG2	chr3:72251855-72310387	312.259	67.9529	2.20013	8.30447e-14	1.17165e-10
ENSSSCT00000012333	ENSSSCG00000011265	XIRP1	chr13:26127753-26137301	1.68061	0.143845	3.5464	1.97532e-08	5.16094e-06
ENSSSCT00000008936	ENSSSCG00000008159	IL1RL1	chr3:54374029-54518149	4.8009	0.26571	4.17538	1.43937e-08	3.9053e-06
ENSSSCT00000000153	ENSSSCG00000000146	MYH11	GL893077.1:10936-50415	390.087	123.517	1.65908	1.09601e-06	0.000156721
ENSSSCT00000023814	ENSSSCG00000023690	PTMA	GL894918.2:6122-7597	4664.58	1294.31	1.84956	4.69647e-11	2.5269e-08
ENSSSCT00000007507	ENSSSCG00000023098	-	chr4:126313701-126321860	40.2546	7.11171	2.50088	3.58025e-12	2.91635e-09
ENSSSCT00000007508	ENSSSCG00000022983	-	chr4:126526445-126534670	54.1493	13.6502	1.98802	3.70036e-10	1.52553e-07
ENSSSCT00000018997	ENSSSCG00000017451	-	chr12:21754048-21754579	12.8833	0.788579	4.03011	8.61825e-06	0.000894059
ENSSSCT00000014869	ENSSSCG00000013614	CNN1	chr2:70536386-70544292	151.294	49.9777	1.598	2.29974e-08	5.84033e-06
ENSSSCT00000033922	ENSSSCG00000006002	NOV	chr4:20522555-20533993	24.2446	7.08948	1.77391	8.75818e-08	1.76523e-05
ENSSSCT00000009004	ENSSSCG00000008222	-	chr3:60964940-61037239	8.03588	0.217654	5.20635	0.000312122	0.0152316
ENSSSCT00000031651	ENSSSCG00000021417	-	chr4:126676539-126682403	21.7646	4.16126	2.38689	3.46926e-08	8.03869e-06
ENSSSCT00000036193	ENSSSCG00000006580	S100A2	chr4:104922474-104926484	44.9878	10.7947	2.05921	2.87921e-05	0.00231098
ENSSSCT00000030906	ENSSSCG00000005205	KIAA2026	chr1:241842298-241952442	0.791468	0	inf	2.77573e-05	0.00225068
ENSSSCT00000024294	ENSSSCG00000027643	DIO2	chr7:109298355-109308540	6.88614	1.84895	1.89699	0.000101488	0.00634812
ENSSSCT00000022928	ENSSSCG00000021818	ENOX1	chr11:24163873-24477053	1.13898	0.202022	2.49516	0.00138158	0.0451208
ENSSSCT00000018510	ENSSSCG00000016998	NPM1	chr16:56963966-56978495	279.824	131.764	1.08657	0.000196806	0.0106946
ENSSSCT00000018517	ENSSSCG00000017005	KCNMB1	chr16:57959703-57971192	15.3556	2.52328	2.6054	2.41621e-06	0.000304371
ENSSSCT00000002540	ENSSSCG00000002282	MAX	chr7:95520599-95544268	100.027	43.4094	1.20431	0.00133723	0.0439893
ENSSSCT00000022887	ENSSSCG00000016077	HSPD1	chr15:112534189-112547852	9.06973	2.1769	2.05878	2.23746e-05	0.00188401
ENSSSCT00000024739	ENSSSCG00000016345	-	chr15:153160291-153194892	8.92172	0.437762	4.3491	8.46778e-10	3.20007e-07
ENSSSCT00000010790	ENSSSCG00000009844	HSPB8	chr14:35688332-35701411	30.2559	14.6958	1.04181	0.00142838	0.046387
ENSSSCT00000019273	ENSSSCG00000017707	TAF15	chr12:41256358-41277426	21.4404	9.60861	1.15793	0.000496652	0.0214795
ENSSSCT00000032071	ENSSSCG00000030198	-	chr1:147292890-147294855	11.5846	4.18801	1.46787	0.000197486	0.0107072
ENSSSCT00000028918	ENSSSCG00000030140	-	chr4:126491805-126500728	33.3822	8.70802	1.93866	2.52321e-08	6.25767e-06
ENSSSCT00000029139	ENSSSCG00000026689	CCDC114	chr6:49364537-49390203	1.5018	0.277413	2.43659	0.000723109	0.0284659
ENSSSCT00000013476	ENSSSCG00000012323	TSPYL2	chrX:51409611-51416841	23.679	11.0639	1.09775	0.000266145	0.0133999
ENSSSCT00000006747	ENSSSCG00000006153	FABP5	chr4:60306136-60311183	79.8583	36.0424	1.14775	0.000148311	0.00856789
ENSSSCT00000030392	ENSSSCG00000026985	-	chr17:21669058-21703745	1.1626	0.0918621	3.66174	0.000874596	0.0326439
ENSSSCT00000005998	ENSSSCG00000005453	TXN	chr1:282027081-282076574	1540.56	771.661	0.997419	0.000326044	0.0157776
ENSSSCT00000026895	ENSSSCG00000025475	NPR3	GL893974.1:17329-19334	106.343	50.649	1.07012	0.00020656	0.0110576
ENSSSCT00000018460	ENSSSCG00000028231	-	chr16:47533975-47681209	1301.56	596.534	1.12556	6.28251e-05	0.00427523
ENSSSCT00000018266	ENSSSCG00000024462	RPL36A	chr16:97366-174390	1305.19	595.63	1.13177	5.72822e-05	0.00401855
ENSSSCT00000009978	ENSSSCG00000009111	SYNPO2	chr8:112415521-112556423	60.974	30.9515	0.978184	0.000685958	0.0273046
ENSSSCT00000013884	ENSSSCG00000012699	FHL1	chrX:127232156-127289862	108.302	50.6566	1.09623	0.000136738	0.00806815
ENSSSCT00000006580	ENSSSCG00000005997	COL14A1	chr4:19715673-19949617	45.3481	23.3463	0.95785	0.000806967	0.0308912
ENSSSCT00000006581	ENSSSCG00000005998	DEPTOR	chr4:20006540-20171545	5.55745	0	inf	1.21288e-05	0.0011685
ENSSSCT00000006583	ENSSSCG00000006000	TAF2	chr4:20215554-20284818	0.863562	0	inf	0.000118107	0.00718936
ENSSSCT00000030269	ENSSSCG00000023034	-	chr4:126682470-126684129	100.685	10.0545	3.32394	4.29009e-09	1.39679e-06
ENSSSCT00000014468	ENSSSCG00000013248	LRP4	chr2:16981001-17020205	8.6004	3.01773	1.51094	2.61062e-06	0.000324356
ENSSSCT00000033720	ENSSSCG00000012699	FHL1	chrX:127232156-127289862	72.6703	32.2671	1.1713	7.88899e-05	0.00515292
ENSSSCT00000005813	ENSSSCG00000005278	PRUNE2	chr1:256320553-256399971	12.1944	5.53511	1.13953	6.29326e-05	0.00427787
ENSSSCT00000005812	ENSSSCG00000005277	GCNT1	chr1:256219661-256220948	36.0181	15.5651	1.21041	0.000247896	0.0126823
ENSSSCT00000005777	ENSSSCG00000005243	-	chr1:247961313-248144476	75.9736	32.3322	1.23252	1.22466e-05	0.00117628
ENSSSCT00000029958	ENSSSCG00000023769	S100A2	JH118413.1:26612-29880	59.2958	11.5077	2.36533	1.94234e-06	0.000253739
ENSSSCT00000023943	ENSSSCG00000005494	-	chr1:286732771-286813962	4.01617	1.41308	1.50697	0.000894043	0.0331941
ENSSSCT00000028396	ENSSSCG00000024333	-	GL896282.2:2202-27979	13.7393	6.20648	1.14646	8.66695e-05	0.00555253
ENSSSCT00000008616	ENSSSCG00000007864	GPRC5B	chr3:26734479-26751349	84.1615	35.2915	1.25384	2.94146e-05	0.00235202
ENSSSCT00000002757	ENSSSCG00000002481	SERPINA5	chr7:122915941-122927433	2.4181	0.423984	2.51179	0.000135594	0.00801555
ENSSSCT00000036347	ENSSSCG00000017199	TRIM47	chr12:5492061-5496460	1.14279	0	inf	0.000687749	0.0273431
ENSSSCT00000025196	ENSSSCG00000029470	POMP	chr11:5755486-5758255	658.754	269.633	1.28875	0.00111495	0.0389368
ENSSSCT00000023491	ENSSSCG00000021860	-	chr7:23092694-23093006	126.697	41.6726	1.60421	0.00101042	0.0363794
ENSSSCT00000013679	ENSSSCG00000012510	ARMCX2	chrX:97075724-97085636	3.55211	0.0865508	5.35899	0.00105623	0.0374859
ENSSSCT00000011156	ENSSSCG00000010190	ACTA1	chr14:65236450-65239189	17.1553	0.12535	7.09655	1.09626e-11	7.40428e-09
ENSSSCT00000002652	ENSSSCG00000002385	TGFB3	chr7:105178632-105206982	8.56072	3.10189	1.46459	0.000156993	0.0089233
ENSSSCT00000016707	ENSSSCG00000015334	PDK4	chr9:82625076-82638263	127.979	54.1544	1.24076	4.0734e-05	0.00306781
ENSSSCT00000030178	ENSSSCG00000027808	-	chr17:13778554-13912900	61.125	23.0474	1.40716	0.00112499	0.0391581
ENSSSCT00000036305	ENSSSCG00000012262	KDM6A	chrX:44567691-44704826	1.26462	0	inf	4.14935e-05	0.00311761
ENSSSCT00000017663	ENSSSCG00000016222	KCNE4	chr15:138616539-138617052	6.67782	0.559161	3.57804	0.00122982	0.0414218
ENSSSCT00000028583	ENSSSCG00000026834	-	chr15:119914392-119914563	5973.57	936.472	2.67329	0.000986747	0.0357577
ENSSSCT00000010908	ENSSSCG00000009953	KIAA1671	chr14:45824559-45896852	5.12652	1.22833	2.06128	0.00107894	0.0379717
ENSSSCT00000029479	ENSSSCG00000028338	PAMR1	chr2:27877534-27954885	15.8734	6.50148	1.28778	8.58165e-05	0.00550901
ENSSSCT00000018785	ENSSSCG00000017256	-	chr12:11806255-11850359	5.11478	1.61279	1.66512	5.74102e-05	0.00402224
ENSSSCT00000031422	ENSSSCG00000027121	ODC1	GL894404.1:6995-13088	432.929	135.784	1.67281	1.77262e-07	3.2811e-05
ENSSSCT00000017758	ENSSSCG00000016306	-	chr15:148216755-148418220	0.775819	0	inf	0.000207613	0.011091
ENSSSCT00000022251	ENSSSCG00000022314	CLIC4	chr6:76099642-76192726	199.672	99.3448	1.00712	0.000495729	0.0214795
ENSSSCT00000035974	ENSSSCG00000002795	CDH11	chr6:23708328-23815130	10.9773	3.30159	1.7333	5.99793e-05	0.00414441
ENSSSCT00000032755	ENSSSCG00000007516	STX16	chr17:66106713-66134997	9.70333	2.75843	1.81463	0.000617294	0.0252848
ENSSSCT00000028366	ENSSSCG00000016231	-	chr15:136930814-136936376	135.828	54.7327	1.3113	1.15513e-05	0.00113176
ENSSSCT00000030509	ENSSSCG00000021119	-	chr5:3855964-3995674	44.7335	13.0075	1.78201	0.000895967	0.0332441
ENSSSCT00000011106	ENSSSCG00000010144	ACTN2	chr14:58645068-58717200	1.18598	0.331648	1.83836	0.00156886	0.0494574
ENSSSCT00000030104	ENSSSCG00000020785	DES	chr15:134534142-134587352	367.108	66.4145	2.46663	6.23945e-14	9.43183e-11
ENSSSCT00000026748	ENSSSCG00000027601	FAM180A	chr18:14307712-14321340	5.18853	1.61982	1.67949	0.000753815	0.0293433
ENSSSCT00000023543	ENSSSCG00000030422	PFDN1	chr2:147990659-148021334	301.979	115.775	1.38312	0.000193055	0.010539
ENSSSCT00000009230	ENSSSCG00000008429	EPCAM	chr3:99312714-99328503	58.8381	12.7087	2.21094	3.31113e-12	2.84081e-09
ENSSSCT00000017672	ENSSSCG00000016230	EPHA4	chr15:136746505-136874945	64.806	29.9044	1.11577	6.93698e-05	0.00466055
ENSSSCT00000016859	ENSSSCG00000015476	CHI3L1	chr9:125344017-125353610	8.78884	2.69638	1.70465	0.000122819	0.00737717
ENSSSCT00000017061	ENSSSCG00000015663	C4BPA	chr9:74195615-74207951	125.352	64.174	0.965927	0.000606256	0.0249615
ENSSSCT00000010091	ENSSSCG00000009216	SPP1	chr8:140307937-140315415	195.206	83.9738	1.21699	1.73811e-05	0.00154553
ENSSSCT00000010095	ENSSSCG00000009219	IBSP	chr8:140438439-140452173	80.1952	17.8495	2.16763	1.23488e-11	8.16679e-09
ENSSSCT00000012062	ENSSSCG00000011020	KIAA1462	chr10:45386449-45428443	0.631449	0	inf	0.000745518	0.0290738
ENSSSCT00000034512	ENSSSCG00000009219	IBSP	chr8:140438439-140452173	130.843	38.7908	1.75405	1.3293e-09	4.71487e-07
ENSSSCT00000025309	ENSSSCG00000022631	-	chr4:120122173-120122984	2591.96	174.393	3.89363	0.00100111	0.0361546
ENSSSCT00000009106	ENSSSCG00000008315	PAIP2B	chr3:74881397-74940726	29.8176	14.5574	1.03441	0.000781948	0.0301392
ENSSSCT00000024957	ENSSSCG00000023270	-	chr1:247247869-247250632	45.9768	14.3004	1.68485	0.000148594	0.00856867
ENSSSCT00000013557	ENSSSCG00000012399	FOXO4	chrX:64662673-64670530	21.6383	11.361	0.929497	0.00139684	0.0454557
ENSSSCT00000010605	ENSSSCG00000009672	SCARA5	chr14:12845866-12978045	18.7101	8.57548	1.12552	0.000143187	0.00836283
ENSSSCT00000006040	ENSSSCG00000026492	-	chr1:286604310-286608866	15.8478	6.07771	1.38268	0.00120228	0.0408627
ENSSSCT00000027500	ENSSSCG00000024674	ABL2	chr9:132671843-132782759	26.4741	11.7602	1.17067	4.3883e-05	0.00325478
ENSSSCT00000029365	ENSSSCG00000023212	PPP1R14A	chr6:42669943-42674708	194.7	65.6742	1.56785	3.08948e-07	5.35924e-05
ENSSSCT00000016909	ENSSSCG00000015522	ANGPTL1	chr9:132314884-132493994	12.3295	3.55273	1.79511	1.19913e-05	0.00116232
ENSSSCT00000012101	ENSSSCG00000011057	-	chr10:52805642-52821675	48.616	17.3001	1.49065	0.000245392	0.0125948
ENSSSCT00000024385	ENSSSCG00000029399	-	GL893688.1:21661-31651	1777.61	499.735	1.8307	3.19683e-10	1.34413e-07
ENSSSCT00000025528	ENSSSCG00000028277	-	chr4:126555008-126563173	33.1958	6.605	2.32937	2.64939e-10	1.1521e-07
ENSSSCT00000010877	ENSSSCG00000009926	-	chr14:43577627-43593228	7.01445	1.95391	1.84397	2.65804e-05	0.0021768
ENSSSCT00000018405	ENSSSCG00000016900	-	chr16:36289024-36296446	55.1123	3.93551	3.80775	1.28715e-11	8.42472e-09
ENSSSCT00000028692	ENSSSCG00000030168	CYP19A1	chr1:133903978-133936093	75.326	18.7886	2.00329	8.896e-09	2.60276e-06
ENSSSCT00000015173	ENSSSCG00000013887	INSL3	chr2:59499015-59500655	256.642	83.8396	1.61405	1.74001e-08	4.62224e-06
ENSSSCT00000010933	ENSSSCG00000009977	RASL10A	chr14:49420328-49423167	4.79071	0.689424	2.79678	1.72559e-05	0.00153655
ENSSSCT00000032688	ENSSSCG00000011946	ALCAM	chr13:162987675-163045773	1.46488	0	inf	0.00026183	0.0132141
ENSSSCT00000030748	ENSSSCG00000028588	-	GL895073.2:8127-13225	290.195	94.4762	1.619	2.07236e-08	5.3923e-06
ENSSSCT00000001000	ENSSSCG00000000916	LUM	chr5:96175703-96184752	51.4409	12.0609	2.09258	7.9714e-13	8.14785e-10
ENSSSCT00000001001	ENSSSCG00000000917	KERA	chr5:96275118-96280110	5.04774	0.190145	4.73046	1.10231e-05	0.00108503
ENSSSCT00000001002	ENSSSCG00000000918	EPYC	chr5:96320059-96355948	1.75976	0	inf	0.00103286	0.0368808
ENSSSCT00000014851	ENSSSCG00000013597	RPS28	chr2:71320355-71321505	6947.65	2592.44	1.42222	8.96515e-05	0.00570901
ENSSSCT00000011983	ENSSSCG00000010948	CTSL	chr10:31837904-32028811	347.13	72.6054	2.25733	4.996e-14	7.92978e-11
ENSSSCT00000012727	ENSSSCG00000011630	ACKR4	chr13:81305208-81403413	2.05914	0	inf	0.000154766	0.00882577
ENSSSCT00000004620	ENSSSCG00000004181	VNN1	chr1:34523096-34543521	11.5007	3.06785	1.90643	1.33965e-05	0.00125262
ENSSSCT00000000689	ENSSSCG00000000640	-	chr5:64347589-64352543	1.44235	0	inf	0.000260122	0.0131383
ENSSSCT00000000530	ENSSSCG00000000492	LYZ	chr5:36179189-36185575	128.283	58.6133	1.13003	5.9712e-05	0.0041387
ENSSSCT00000006564	ENSSSCG00000005981	FBXO32	chr4:16638621-16669461	35.9507	17.6191	1.02888	0.00048778	0.0212551
ENSSSCT00000025641	ENSSSCG00000015071	SIK3	chr9:49296589-49404314	0.834079	0	inf	0.000116749	0.00712716
ENSSSCT00000016864	ENSSSCG00000015481	MYOC	chr9:125551262-125562629	9.3171	0.206832	5.49335	5.94547e-12	4.44084e-09
ENSSSCT00000036240	ENSSSCG00000013297	CD44	chr2:28156391-28374853	1.74751	0.0947558	4.20495	0.00045613	0.0202796
ENSSSCT00000028617	ENSSSCG00000029877	MKRN2	chr13:75831025-75848212	3.05991	0	inf	6.41661e-06	0.000698772
ENSSSCT00000029569	ENSSSCG00000025300	-	chr4:126656601-126661097	32.2417	4.5399	2.8282	6.87033e-11	3.46183e-08
ENSSSCT00000004009	ENSSSCG00000003614	-	chr6:82666060-82668485	55.9441	19.9801	1.48542	6.69022e-07	0.000102846
ENSSSCT00000011822	ENSSSCG00000010806	RGS2	chr10:2543422-2546894	92.2978	41.1499	1.16541	3.72729e-05	0.00285111
ENSSSCT00000007714	ENSSSCG00000007045	CHGB	chr17:15800453-15870087	4.75257	1.32727	1.84025	0.000121936	0.00733106
ENSSSCT00000035788	ENSSSCG00000031053	S100A1	chr4:104900201-104900536	1049.52	345.599	1.60256	3.42887e-08	7.9742e-06
ENSSSCT00000004636	ENSSSCG00000004195	-	chr1:35580460-35594611	4.0573	0.533212	2.92774	2.8748e-06	0.000353671
ENSSSCT00000001163	ENSSSCG00000001068	-	chr7:14013387-14052973	9.41879	3.30316	1.5117	0.000126253	0.00756197
ENSSSCT00000034196	ENSSSCG00000012126	GPM6B	chrX:11383150-11536112	0.9401	0	inf	0.00107281	0.0378608
ENSSSCT00000033082	ENSSSCG00000022107	CHTOP	chr4:104889208-104898793	11.4404	0	inf	5.94058e-08	1.24888e-05
ENSSSCT00000003275	ENSSSCG00000002953	-	chr6:42723118-42735370	181.553	55.5733	1.70793	0.000139561	0.00818909
ENSSSCT00000006731	ENSSSCG00000006138	ATP6V0D2	chr4:55660234-55715444	12.4093	2.78174	2.15736	1.71704e-07	3.19687e-05
ENSSSCT00000006943	ENSSSCG00000006335	RGS4	chr4:95096193-95103381	23.472	10.7075	1.13232	0.0001491	0.00859005
ENSSSCT00000027574	ENSSSCG00000024312	ID4	chr7:16178088-16182991	14.9431	7.66751	0.962649	0.00136172	0.0445907
ENSSSCT00000027684	ENSSSCG00000004371	AIM1	chr1:81996298-82061659	1.48278	0.349273	2.08587	0.000178519	0.00989316
ENSSSCT00000033635	ENSSSCG00000012126	GPM6B	chrX:11383150-11536112	4.76432	0	inf	1.16377e-05	0.00113847
ENSSSCT00000028568	ENSSSCG00000029058	C14H10orf116	chr14:95183008-95185230	307.256	39.1274	2.97319	3.55271e-15	8.67532e-12
ENSSSCT00000000879	ENSSSCG00000000810	AMIGO2	chr5:80651421-80652987	164.927	71.8724	1.19832	2.20195e-05	0.00185904
ENSSSCT00000026979	ENSSSCG00000025910	ZNF277	chr18:36184985-36214490	131.802	59.8806	1.13821	0.000375642	0.017532
ENSSSCT00000033582	ENSSSCG00000008939	JCHAIN	chr8:71347283-71358511	1.89311	0	inf	0.001271	0.0424933
ENSSSCT00000004917	ENSSSCG00000004452	PRSS35	chr1:92967486-92968731	43.833	8.65012	2.34123	1.86739e-10	8.5294e-08
ENSSSCT00000027876	ENSSSCG00000020962	DYNLL2	chr12:35383128-35390288	92.6752	49.2948	0.91075	0.00116795	0.0401256
ENSSSCT00000018296	ENSSSCG00000016806	CDH6	chr16:18351300-18479581	18.2594	8.93992	1.03031	0.000982912	0.0356581
ENSSSCT00000010650	ENSSSCG00000009714	NEK1	chr14:21439164-21617923	0.657821	0	inf	0.000454995	0.0202575
ENSSSCT00000030583	ENSSSCG00000024308	-	chr14:123606435-123618566	960.484	168.934	2.5073	2.11589e-05	0.00180074
ENSSSCT00000002808	ENSSSCG00000002529	-	chr7:129322111-129322456	3445.02	1639.39	1.07135	0.000227163	0.0118702
ENSSSCT00000024110	ENSSSCG00000022487	-	chr2:16305772-16305997	463.494	61.3941	2.91638	1.27614e-05	0.00120927
ENSSSCT00000018641	ENSSSCG00000017123	-	chr16:86738792-86739005	1045.57	207.93	2.33012	4.58526e-05	0.00338898
ENSSSCT00000001749	ENSSSCG00000001570	PI16	chr7:37504336-37514234	72.0384	21.4981	1.74456	5.46411e-09	1.70892e-06
ENSSSCT00000024350	ENSSSCG00000028730	MEPE	chr8:140417802-140428568	2.2599	0	inf	0.000630077	0.0256758
ENSSSCT00000017291	ENSSSCG00000015879	DAPL1	chr15:73001693-73025731	52.9309	15.537	1.7684	3.17215e-05	0.00250806
ENSSSCT00000027194	ENSSSCG00000016535	CALD1	chr18:15075828-15194597	52.976	7.22442	2.87439	0	0
ENSSSCT00000012521	ENSSSCG00000011441	TNNC1	chr13:37805312-37808062	23.5274	5.9267	1.98904	0.000520239	0.0223474
ENSSSCT00000031176	ENSSSCG00000020771	INHA	chr15:134507303-134511349	463.869	230.382	1.00969	0.00124917	0.0418956
ENSSSCT00000034060	ENSSSCG00000011833	DLG1	chr13:142336266-142629535	7.92817	2.82383	1.48934	0.000676094	0.0270306
ENSSSCT00000011959	ENSSSCG00000010927	-	chr10:29144879-29145068	845.09	109.68	2.94581	0.00137185	0.0448493
ENSSSCT00000018851	ENSSSCG00000017315	-	chr12:17474635-17479706	63.2776	23.4823	1.43012	0.00153243	0.0485976
ENSSSCT00000011485	ENSSSCG00000010497	ENTPD1	chr14:116929632-117025486	5.50932	0	inf	1.22309e-07	2.38199e-05
ENSSSCT00000011482	ENSSSCG00000010494	SORBS1	chr14:116528969-116647727	9.31963	4.56389	1.03001	0.000505572	0.0217911
ENSSSCT00000015390	ENSSSCG00000014089	F2RL2	chr2:87128323-87215914	12.9313	4.45154	1.53849	1.34197e-05	0.00125295
ENSSSCT00000004594	ENSSSCG00000004156	IFNGR1	chr1:30388404-30408868	8.47568	2.87717	1.55868	0.00148596	0.0477924
ENSSSCT00000031638	ENSSSCG00000026449	KDM4A	GL895172.1:700-38924	8.33989	3.32369	1.32724	0.00100026	0.0361442
ENSSSCT00000035813	ENSSSCG00000011101	ITGB1	chr10:61450694-61502941	0.860682	0	inf	0.000361391	0.0170717
ENSSSCT00000023747	ENSSSCG00000025240	DDIT4L	chr8:129550396-129555105	17.1083	6.11303	1.48474	7.84674e-06	0.000826172
ENSSSCT00000026516	ENSSSCG00000024689	HTR3C	chr13:131404259-131426785	2.12817	0	inf	0.000129814	0.00774603
ENSSSCT00000031482	ENSSSCG00000028274	FAM131B	chr18:7134210-7181268	1.01335	0.115796	3.12947	7.86096e-06	0.000826299
ENSSSCT00000006706	ENSSSCG00000006114	CU207250.1	chr4:47615754-47616772	13.1055	2.87802	2.18702	1.99245e-05	0.00171873
ENSSSCT00000022963	ENSSSCG00000025311	-	GL896469.1:4124-9364	221.312	43.9538	2.33202	8.17324e-07	0.000120677
ENSSSCT00000030359	ENSSSCG00000028560	-	chr14:2838619-2839219	10.7604	2.47106	2.12252	0.00129608	0.0429697
ENSSSCT00000009412	ENSSSCG00000008601	SDC1	chr3:125988734-125994234	9.24113	2.31898	1.99458	4.3784e-06	0.000506339
ENSSSCT00000031724	ENSSSCG00000020792	-	GL892963.1:3383-61265	3.13132	0.54752	2.51579	0.00117341	0.0402261
ENSSSCT00000024632	ENSSSCG00000009049	USP38	chr8:89717749-89798021	1.4437	0	inf	2.81072e-05	0.00227325
ENSSSCT00000026571	ENSSSCG00000028731	CXCL13	chr8:77268243-77274304	4.50739	0.414998	3.44111	3.82453e-05	0.00291846
ENSSSCT00000014759	ENSSSCG00000013512	PLIN4	chr2:74810873-74822994	1.6859	0.399962	2.07558	0.000190879	0.0104472
ENSSSCT00000007217	ENSSSCG00000006588	S100A9	chr4:105063476-105066298	9.64252	1.61621	2.57679	0.000654376	0.0264286
ENSSSCT00000009332	ENSSSCG00000008528	LBH	chr3:115765222-115788044	320.398	119.996	1.41688	0.000124234	0.00745509
ENSSSCT00000024448	ENSSSCG00000022818	-	chr12:28497770-28499345	37.6307	6.94097	2.4387	1.58531e-11	1.01666e-08
ENSSSCT00000017673	ENSSSCG00000016231	-	chr15:136930814-136936376	5.47727	0	inf	0.000247496	0.012672
ENSSSCT00000025832	ENSSSCG00000020978	-	GL893077.1:1132-9650	275.322	66.8755	2.04157	3.56692e-12	2.91635e-09
ENSSSCT00000007393	ENSSSCG00000006748	TSPAN2	chr4:115641712-115680720	10.448	3.21628	1.69976	4.1851e-05	0.00313705
ENSSSCT00000000555	ENSSSCG00000000515	TRHDE	chr5:39065886-39518064	2.13784	0.53188	2.00698	0.000409452	0.0187966
ENSSSCT00000023610	ENSSSCG00000025533	COX7A1	chr6:40921404-40922901	362.136	153.08	1.24224	0.000279178	0.0139785
ENSSSCT00000024571	ENSSSCG00000027857	DMXL1	chr2:128405066-128545583	2.21614	0.723782	1.61442	6.62052e-05	0.0044621
ENSSSCT00000035444	ENSSSCG00000012699	FHL1	chrX:127232156-127289862	15.8584	1.26641	3.64643	5.49688e-06	0.000611193
ENSSSCT00000035869	ENSSSCG00000025777	ESR1	chr1:16870878-16871069	7675.01	1474.79	2.37966	3.80544e-07	6.34176e-05
ENSSSCT00000011352	ENSSSCG00000010370	ANXA8	chr14:95804111-95825709	9.25662	3.44083	1.42773	0.000577545	0.0241387
ENSSSCT00000015634	ENSSSCG00000014310	CXCL14	chr2:143444415-143453547	38.37	16.4138	1.22507	6.28265e-05	0.00427524
ENSSSCT00000032601	ENSSSCG00000007797	ITGAL	chr3:18259592-18298947	1.53245	0.193321	2.98677	0.000807204	0.0308912
ENSSSCT00000035377	ENSSSCG00000012149	RBBP7	chrX:14288823-14312580	98.0958	33.4471	1.55231	0.000139277	0.00818557
ENSSSCT00000013150	ENSSSCG00000012019	TMPRSS15	chr13:192997370-193141213	5.80123	0.431091	3.75029	4.89773e-11	2.59891e-08
ENSSSCT00000023715	ENSSSCG00000029613	SYNM	chr1:154019850-154044632	85.9653	30.0999	1.51399	2.428e-07	4.30589e-05
ENSSSCT00000022747	ENSSSCG00000025216	-	chr4:126279065-126287844	28.5255	7.4654	1.93396	6.3783e-09	1.92834e-06
ENSSSCT00000026244	ENSSSCG00000022536	SLC37A2	chr9:57752749-57790694	12.1944	5.83124	1.06434	0.000245786	0.0126048
ENSSSCT00000002719	ENSSSCG00000002449	NDUFB1	chr7:120296366-120298214	1847.97	962.692	0.940794	0.00063643	0.0258683
ENSSSCT00000014234	ENSSSCG00000013022	PYGM	chr2:6542312-6553842	10.8333	3.92847	1.46344	6.14622e-05	0.00420946
ENSSSCT00000035845	ENSSSCG00000015567	FAM129A	chr9:138454825-138618213	41.3133	20.092	1.03999	0.000238311	0.0123009
ENSSSCT00000025156	ENSSSCG00000023338	CHRNA6	chr17:12640460-12653598	2.2766	0	inf	2.67457e-05	0.00217878
ENSSSCT00000013052	ENSSSCG00000011928	CCDC80	chr13:156787576-156826093	285.335	106.912	1.41623	9.17361e-05	0.00581842
ENSSSCT00000015478	ENSSSCG00000014169	PCSK1	GL895717.1:69561-112481	51.7765	16.6691	1.63512	1.24496e-08	3.48199e-06
ENSSSCT00000010638	ENSSSCG00000009703	HAND2	chr14:17528446-17531529	3.89895	0.532263	2.87287	1.23063e-05	0.00117756
ENSSSCT00000030874	ENSSSCG00000023733	-	chr13:34149667-34151512	5.13476	0.700733	2.87336	0.00117602	0.0402586
ENSSSCT00000003683	ENSSSCG00000003318	GALP	chr6:55712169-55839156	16.0203	1.48774	3.42871	0.000111097	0.0068613
ENSSSCT00000029376	ENSSSCG00000020786	GNG7	chr2:76627013-76631309	304.679	41.4748	2.87698	0.00144742	0.0468375
ENSSSCT00000000857	ENSSSCG00000000791	PDZRN4	chr5:75804959-75875193	12.0449	5.38649	1.161	0.00137429	0.0449061
ENSSSCT00000024662	ENSSSCG00000023032	SCG2	GL894571.1:2662-4960	2.09577	0.0382457	5.77604	9.682e-05	0.00609218
ENSSSCT00000015202	ENSSSCG00000013916	COMP	chr2:58815801-58823375	2.68465	0.283992	3.24081	3.41118e-06	0.00041392
ENSSSCT00000018271	ENSSSCG00000016784	ANKH	chr16:4446885-4611009	15.5612	6.39092	1.28386	0.00052408	0.0224516
ENSSSCT00000029863	ENSSSCG00000027283	-	chr6:82831192-82921450	55.8617	19.6247	1.50919	4.33822e-07	7.11703e-05
ENSSSCT00000012673	ENSSSCG00000011580	TSEN2	chr13:75699480-75737598	18.0939	7.39594	1.2907	8.99573e-05	0.00572072
ENSSSCT00000007528	ENSSSCG00000006874	PALMD	chr4:129940633-129991123	18.2608	7.86297	1.2156	0.000244128	0.01254
ENSSSCT00000007525	ENSSSCG00000006872	AGL	chr4:129761869-129832535	55.3106	25.5635	1.11347	9.5738e-05	0.00604807
ENSSSCT00000032451	ENSSSCG00000023848	C8orf46	chr4:74369541-74392471	2.33546	0.49711	2.23207	7.01394e-05	0.0046941
ENSSSCT00000027423	ENSSSCG00000021240	-	chr5:103467593-103468748	4348.24	388.933	3.48284	2.79865e-10	1.20873e-07
ENSSSCT00000032791	ENSSSCG00000012394	GJB1	chrX:64844645-64852108	1.32158	0	inf	0.000323375	0.0156604
ENSSSCT00000035225	ENSSSCG00000015894	DPP4	chr15:76152547-76235571	0.710323	0	inf	0.000648521	0.0262254
ENSSSCT00000011937	ENSSSCG00000010908	PTPRC	chr10:26308758-26332284	1.09335	0	inf	0.000474996	0.0209133
ENSSSCT00000028016	ENSSSCG00000022405	-	chr12:51863182-51882044	1.59223	0.350384	2.18404	0.00107675	0.0379364
ENSSSCT00000030969	ENSSSCG00000021665	RDH10	GL894040.1:9969-11724	70.0687	12.5522	2.48083	0.000541645	0.0229716
ENSSSCT00000016636	ENSSSCG00000015267	FMO2	chr9:70088605-70126311	3.67558	0.604778	2.6035	4.71854e-06	0.000538805
ENSSSCT00000012478	ENSSSCG00000011400	SEMA3B	chr13:35921156-35928150	55.6346	19.5529	1.5086	1.25427e-07	2.4131e-05
ENSSSCT00000005448	ENSSSCG00000004937	SLC24A1	chr1:181204776-181300384	5.01202	0.441411	3.5052	3.15108e-10	1.33373e-07
ENSSSCT00000008182	ENSSSCG00000007476	KCNG1	chr17:58865300-58884884	3.47544	0.123454	4.81515	5.52331e-08	1.18988e-05
ENSSSCT00000015422	ENSSSCG00000014118	-	chr2:90747285-90761759	5.37786	1.5459	1.79858	0.00100215	0.0361713
ENSSSCT00000015421	ENSSSCG00000014117	-	chr2:90502274-90549368	3.12306	0.516076	2.5973	3.7861e-06	0.000449799
ENSSSCT00000032249	ENSSSCG00000030368	HSP70.2	GL896522.1:2-1799	124.186	59.4088	1.06375	0.00014858	0.00856867
ENSSSCT00000019506	ENSSSCG00000017923	ALOX15	chr12:54502073-54510831	2.447	0.266499	3.19881	1.96213e-06	0.000255798
ENSSSCT00000011289	ENSSSCG00000010313	-	chr14:82826611-82938103	12.7794	4.30256	1.57055	1.14879e-06	0.000162802
ENSSSCT00000003418	ENSSSCG00000003080	IGSF23	chr6:47050121-47057994	5.26672	0.503852	3.38583	2.81971e-05	0.00227662
ENSSSCT00000031739	ENSSSCG00000025209	KIAA1328	chr6:113405282-113411496	1059.21	298.282	1.82824	8.20123e-09	2.42072e-06
ENSSSCT00000018280	ENSSSCG00000016792	FAM134B	chr16:6168455-6324546	49.4858	23.7685	1.05796	0.000201516	0.0108793
ENSSSCT00000018284	ENSSSCG00000016795	-	chr16:6829356-6866653	147.153	48.7948	1.59252	2.24048e-08	5.75895e-06
ENSSSCT00000026389	ENSSSCG00000021600	-	chr8:54512170-54563745	26.079	3.6919	2.82045	6.79989e-12	4.85077e-09
ENSSSCT00000000722	ENSSSCG00000000666	MFAP5	chr5:65575790-65589682	63.5266	2.66698	4.57408	6.12409e-09	1.88744e-06
ENSSSCT00000035903	ENSSSCG00000029830	RPL8	chr4:200004-209523	553.591	295.41	0.906101	0.00149528	0.0479658
ENSSSCT00000033533	ENSSSCG00000002002	IRF9	chr7:80404982-80410952	0	5.72085	#NAME?	0.000578224	0.0241387
ENSSSCT00000015305	ENSSSCG00000014012	GFPT2	chr2:79770222-79812473	38.135	76.116	-0.997084	0.00026783	0.0134741
ENSSSCT00000024555	ENSSSCG00000029345	-	chr3:139866340-139870413	0	2.00711	#NAME?	0.000758135	0.0294754
ENSSSCT00000031273	ENSSSCG00000025630	-	GL896005.2:35384-66886	4.69728	13.6927	-1.54351	2.26074e-06	0.000287236
ENSSSCT00000011944	ENSSSCG00000010914	NAV1	chr10:28617880-28632971	0.475053	3.92705	-3.04729	2.43201e-09	8.21306e-07
ENSSSCT00000013569	ENSSSCG00000012409	CITED1	chrX:65888884-65894578	158.505	314.829	-0.990041	0.000480231	0.0210708
ENSSSCT00000001990	ENSSSCG00000001775	KIAA1024	chr7:54061673-54074837	0.090131	1.44144	-3.99934	9.89589e-07	0.000142791
ENSSSCT00000010883	ENSSSCG00000009931	MVK	chr14:43850911-43874056	33.5418	81.1208	-1.27411	3.48951e-06	0.0004188
ENSSSCT00000022954	ENSSSCG00000026730	-	chr9:102371093-102388393	0.0511505	16.3705	-8.32213	1.3194e-08	3.67399e-06
ENSSSCT00000003996	ENSSSCG00000003601	HCRTR1	chr6:81800442-81875581	0.111152	0.97142	-3.12757	0.00118351	0.040439
ENSSSCT00000031754	ENSSSCG00000020912	HECTD2	chr14:112475113-112561421	5.59634	11.4036	-1.02693	0.00064229	0.0260398
ENSSSCT00000005921	ENSSSCG00000005381	-	chr1:269014796-269023294	58.3254	114.88	-0.977933	0.000371977	0.017442
ENSSSCT00000034567	ENSSSCG00000015390	ABCB1	chr9:102544382-102626450	164.138	441.377	-1.4271	0.000341573	0.0163299
ENSSSCT00000034774	ENSSSCG00000030849	RPL39	chrX:113430784-113434238	1.66203	433.25	-8.02611	2.22045e-16	7.41968e-13
ENSSSCT00000036287	ENSSSCG00000006453	KIRREL	chr4:100515282-100628291	2.95082	7.03511	-1.25346	0.00114678	0.0396774
ENSSSCT00000009245	ENSSSCG00000008443	EPAS1	chr3:100173611-100213334	37.1041	79.4541	-1.09854	0.000144844	0.00839929
ENSSSCT00000006055	ENSSSCG00000005506	MEGF9	chr1:292733748-292827889	13.2715	31.962	-1.26803	3.88036e-06	0.000457919
ENSSSCT00000009556	ENSSSCG00000008736	CPEB2	chr8:9736243-10009746	19.6378	40.1104	-1.03034	0.000181843	0.0100261
ENSSSCT00000028444	ENSSSCG00000024300	TMEM254	chr14:88542474-88551614	40.3927	87.4376	-1.11416	4.82921e-05	0.00354044
ENSSSCT00000009036	ENSSSCG00000008250	CTNNA2	chr3:66285672-66567740	15.3809	36.5421	-1.24842	1.15292e-05	0.00113134
ENSSSCT00000035954	ENSSSCG00000004675	DUOX1	chr1:141171518-141201365	1.0511	4.08438	-1.95822	3.44035e-05	0.00267677
ENSSSCT00000007361	ENSSSCG00000006720	HAO2	chr4:111579208-111603426	10.0305	24.7833	-1.30497	2.92242e-05	0.00233975
ENSSSCT00000005205	ENSSSCG00000004713	TGM5	chr1:143053336-143073905	2.65154	6.88939	-1.37755	0.000645537	0.0261214
ENSSSCT00000006577	ENSSSCG00000005994	SNTB1	chr4:19423080-19550493	17.7533	67.484	-1.92646	7.29594e-12	5.1468e-09
ENSSSCT00000005429	ENSSSCG00000004919	NEDD4L	chr1:179950609-180067851	1.64749	4.377	-1.40967	7.52936e-05	0.00494857
ENSSSCT00000017088	ENSSSCG00000015688	CXCR4	chr15:18125326-18128996	39.2301	116.373	-1.56873	1.42002e-08	3.89323e-06
ENSSSCT00000024472	ENSSSCG00000025721	TMPRSS7	chr13:157329923-157369343	14.1378	55.9941	-1.98572	3.50275e-12	2.91635e-09
ENSSSCT00000023916	ENSSSCG00000025146	-	chr6:73850684-73857935	56.5607	109.058	-0.947218	0.000536805	0.0228273
ENSSSCT00000012793	ENSSSCG00000011685	PAQR9	chr13:91441265-91442399	16.8539	52.412	-1.63681	3.22489e-07	5.51719e-05
ENSSSCT00000018309	ENSSSCG00000016816	ADAMTS12	chr16:20237301-20549746	1.10502	3.2181	-1.54214	0.000228181	0.0119136
ENSSSCT00000028916	ENSSSCG00000026298	-	chr1:155637549-155853766	3.72638	12.621	-1.75998	0.000203672	0.0109492
ENSSSCT00000029794	ENSSSCG00000030648	-	chr3:126064141-126073957	24.7919	173.382	-2.80601	8.88178e-16	2.56316e-12
ENSSSCT00000005324	ENSSSCG00000004822	-	chr1:155637549-155853766	4.51105	12.1009	-1.42358	4.30524e-05	0.00320065
ENSSSCT00000022308	ENSSSCG00000025620	PRICKLE1	JH118727.1:31767-39542	0	2.22527	#NAME?	3.60068e-05	0.00277095
ENSSSCT00000007786	ENSSSCG00000007114	FOXA2	chr17:34053459-34056624	0.208594	1.2384	-2.56971	0.000999133	0.0361241
ENSSSCT00000023443	ENSSSCG00000016548	PODXL	chr18:18531184-18581935	4.79899	10.2757	-1.09843	0.000328101	0.0158164
ENSSSCT00000023991	ENSSSCG00000010575	PPRC1	chr14:122989821-123005689	1.66705	4.08331	-1.29244	0.00156601	0.0494403
ENSSSCT00000029398	ENSSSCG00000025714	UGT8	chr8:115965681-115974810	4.28768	10.3225	-1.26752	0.000229922	0.0119456
ENSSSCT00000028103	ENSSSCG00000025609	-	chr15:148493625-148495090	0.283914	3.04716	-3.42394	0.000861108	0.0323694
ENSSSCT00000019676	ENSSSCG00000018081	ATP6	chrMT:8958-10583	1021.2	2731.73	-1.41955	8.95405e-05	0.00570767
ENSSSCT00000014793	ENSSSCG00000013545	TUBB4A	chr2:73063906-73085299	0.913364	3.9566	-2.115	6.02701e-05	0.00415471
ENSSSCT00000034062	ENSSSCG00000012649	SMARCA1	chrX:121756239-121832582	3.57316	8.40047	-1.23327	0.000657808	0.0264829
ENSSSCT00000033450	ENSSSCG00000012269	CDK16	chrX:46764007-46776684	0	3.56511	#NAME?	0.000165268	0.00925281
ENSSSCT00000025548	ENSSSCG00000022933	EFR3B	chr3:120779482-120799552	3.604	9.34207	-1.37414	0.000610052	0.0250852
ENSSSCT00000029425	ENSSSCG00000028278	-	chr12:54955583-54972426	12.2451	24.9733	-1.02818	0.00029372	0.0145687
ENSSSCT00000007963	ENSSSCG00000007278	AHCY	chr17:42693944-42706680	16.2577	32.9272	-1.01816	0.000505089	0.021785
ENSSSCT00000017701	ENSSSCG00000016256	SPHKAP	chr15:143190623-143341643	0.496869	3.20467	-2.68924	5.89912e-09	1.82697e-06
ENSSSCT00000012552	ENSSSCG00000011470	ABHD6	chr13:43854444-44014598	19.2335	38.3093	-0.994073	0.0014614	0.0472172
ENSSSCT00000009460	ENSSSCG00000008647	CMPK2	chr3:137688567-137704282	1.10834	3.89848	-1.81451	0.000314493	0.0153237
ENSSSCT00000005253	ENSSSCG00000004754	CHAC1	chr1:145522852-145525603	7.86228	18.0045	-1.19534	0.000914719	0.0337251
ENSSSCT00000026071	ENSSSCG00000022295	C9orf16	chr1:302606723-302610204	60.2623	136.285	-1.17729	9.31586e-05	0.00589098
ENSSSCT00000028217	ENSSSCG00000025783	ENTPD3	chr13:26979073-27014358	2.64035	7.48769	-1.50379	5.00113e-05	0.00362876
ENSSSCT00000015784	ENSSSCG00000014439	SLC26A2	chr2:157908465-158077825	12.882	33.8468	-1.39366	1.3868e-05	0.00128723
ENSSSCT00000008178	ENSSSCG00000007473	ADNP	chr17:58757707-58790779	8.50445	17.4924	-1.04044	0.000290355	0.0144244
ENSSSCT00000012867	ENSSSCG00000011756	NLGN1	chr13:121518225-121525986	3.28113	8.21815	-1.32462	0.000181922	0.0100261
ENSSSCT00000000207	ENSSSCG00000000194	TUBA1C	chr5:15667322-15676220	123.107	308.196	-1.32393	6.34921e-06	0.00069262
ENSSSCT00000017594	ENSSSCG00000016159	-	chr15:125183126-125279114	0.718744	5.00849	-2.80082	2.3521e-11	1.43589e-08
ENSSSCT00000015537	ENSSSCG00000014219	CDO1	chr2:124815021-124828122	77.2456	147.183	-0.930083	0.000765929	0.0296874
ENSSSCT00000023043	ENSSSCG00000025551	-	chr7:46279207-46417272	10.395	22.6868	-1.12596	5.11706e-05	0.0037002
ENSSSCT00000032169	ENSSSCG00000022111	-	chr7:37258052-37267163	20.1482	47.6634	-1.24223	1.18976e-05	0.00115663
ENSSSCT00000011585	ENSSSCG00000010591	CYP17A1	chr14:123773104-123779533	110.091	239.853	-1.12346	0.000117899	0.00718359
ENSSSCT00000030173	ENSSSCG00000025598	-	chr15:79412980-79434415	13.9493	41.2266	-1.56338	2.81157e-08	6.81312e-06
ENSSSCT00000029474	ENSSSCG00000025667	FBXO2	chr6:65660549-65663976	12.9267	35.4012	-1.45345	4.61632e-06	0.000528082
ENSSSCT00000017754	ENSSSCG00000016303	-	chr15:148216755-148418220	5.63516	15.2363	-1.43498	0.000872883	0.0326439
ENSSSCT00000012778	ENSSSCG00000011673	-	chr13:90213893-90214971	6.04889	17.9095	-1.56598	0.000185924	0.01022
ENSSSCT00000013552	ENSSSCG00000012394	GJB1	chrX:64844645-64852108	0	1.36792	#NAME?	0.000672017	0.0268845
ENSSSCT00000000653	ENSSSCG00000000607	ART4	chr5:61098144-61124875	1.89345	9.57442	-2.33817	4.33422e-06	0.000502145
ENSSSCT00000032615	ENSSSCG00000001409	PRRC2A	chr7:27495907-27511694	3.1146	14.0594	-2.17441	0.00042867	0.0194677
ENSSSCT00000016670	ENSSSCG00000015299	STEAP4	chr9:74983718-75005883	7.1452	15.2086	-1.08984	0.000953787	0.034902
ENSSSCT00000025632	ENSSSCG00000020756	FAM101A	chr14:30518902-30536047	11.2642	45.8123	-2.02399	1.14611e-11	7.65948e-09
ENSSSCT00000017060	ENSSSCG00000015662	C4BPA	chr9:74110908-74154259	11.2343	23.5061	-1.06513	0.000551399	0.0232455
ENSSSCT00000033158	ENSSSCG00000012823	DKC1	chrX:143254268-143264309	1.44276	8.28717	-2.52205	8.35836e-06	0.000871369
ENSSSCT00000010116	ENSSSCG00000009237	HPSE	chr8:144378354-144417268	4.46325	9.83607	-1.13999	0.000732571	0.0287277
ENSSSCT00000005116	ENSSSCG00000004632	GLDN	chr1:133474074-133550566	31.6636	69.5576	-1.13538	5.15574e-05	0.00371547
ENSSSCT00000025308	ENSSSCG00000030456	-	GL893411.2:926-5997	56.3302	111	-0.978575	0.000366272	0.0172394
ENSSSCT00000016436	ENSSSCG00000015070	APOA1	chr9:49288614-49290784	6.76013	79.7776	-3.56086	0	0
ENSSSCT00000029360	ENSSSCG00000006155	ZBTB10	chr4:61268303-61304788	1.08761	2.86956	-1.39966	0.000929514	0.0341911
ENSSSCT00000015349	ENSSSCG00000014051	TSPAN17	chr2:82867848-82878311	23.8241	47.3719	-0.991612	0.000372486	0.017453
ENSSSCT00000032805	ENSSSCG00000012491	CENPI	chrX:90692347-90742570	0.0985107	1.3877	-3.81627	0.000225297	0.0118019
ENSSSCT00000035468	ENSSSCG00000012650	OCRL	chrX:121904423-121959210	1.42139	4.927	-1.7934	2.30741e-05	0.00193777
ENSSSCT00000017761	ENSSSCG00000016308	-	chr15:148087402-148163653	8.00101	22.0768	-1.46428	1.44381e-05	0.00133624
ENSSSCT00000017765	ENSSSCG00000016312	-	chr15:148216755-148418220	7.30254	19.4778	-1.41536	7.24587e-06	0.000770575
ENSSSCT00000004085	ENSSSCG00000003687	EPB41L3	chr6:94749952-94835636	11.5702	34.6417	-1.58209	6.79613e-08	1.40547e-05
ENSSSCT00000003072	ENSSSCG00000002774	FAM65A	chr6:25438877-25447925	3.15672	7.30949	-1.21134	0.00058397	0.0242986
ENSSSCT00000007511	ENSSSCG00000006858	OLFM3	chr4:128207124-128249603	3.36829	11.3477	-1.75231	1.90612e-07	3.48755e-05
ENSSSCT00000014853	ENSSSCG00000013599	ANGPTL4	chr2:71271943-71279720	51.159	109.166	-1.09347	8.26096e-05	0.00534638
ENSSSCT00000024309	ENSSSCG00000028964	PIM2	chrX:47814099-47819387	21.6674	40.7278	-0.910489	0.00115899	0.0400126
ENSSSCT00000031629	ENSSSCG00000021786	-	chr13:120826339-121025641	7.01242	16.8908	-1.26826	0.00148205	0.0477121
ENSSSCT00000018484	ENSSSCG00000016974	MAP1B	chr16:52391815-52489863	20.8966	67.4487	-1.69052	1.69249e-07	3.16043e-05
ENSSSCT00000029765	ENSSSCG00000021576	CD83	chr7:10634534-10817827	69.9412	145.633	-1.05812	0.000208096	0.0111023
ENSSSCT00000018526	ENSSSCG00000017014	PANK3	chr16:59904336-59917314	120.093	223.862	-0.898454	0.00107656	0.0379364
ENSSSCT00000029060	ENSSSCG00000015861	WDR33	chr15:66266813-66381975	0.260718	3.62259	-3.79646	1.14586e-08	3.24776e-06
ENSSSCT00000018316	ENSSSCG00000016823	-	chr16:20792524-20819543	6.53857	14.9106	-1.18929	0.000154834	0.00882577
ENSSSCT00000017315	ENSSSCG00000015902	-	chr15:79683635-79795742	20.6691	52.1983	-1.33653	9.93962e-06	0.00100009
ENSSSCT00000024966	ENSSSCG00000025176	-	chr2:61948628-61963162	7.18261	14.4064	-1.00413	0.00112274	0.0391012
ENSSSCT00000016765	ENSSSCG00000015390	ABCB1	chr9:102544382-102626450	43.0416	155.202	-1.85034	2.90807e-09	9.66653e-07
ENSSSCT00000016764	ENSSSCG00000015389	-	chr9:102174740-102237020	5.35414	51.3349	-3.26121	0	0
ENSSSCT00000030896	ENSSSCG00000030167	SLC25A39	chr12:19275069-19278295	50.2059	126.18	-1.32955	1.37778e-06	0.000190161
ENSSSCT00000033666	ENSSSCG00000012784	SSR4	chrX:142093231-142106233	2.88338	57.6411	-4.32127	1.56537e-09	5.52133e-07
ENSSSCT00000018391	ENSSSCG00000016887	ITGA2	chr16:34164829-34265784	0.421483	3.23912	-2.94206	7.90247e-07	0.000117775
ENSSSCT00000034024	ENSSSCG00000017022	HMMR	chr16:65131631-65185014	0	2.27445	#NAME?	0.00156062	0.0493192
ENSSSCT00000016440	ENSSSCG00000015074	SIDT2	chr9:49613081-49629040	4.87609	10.8404	-1.15263	0.000195359	0.0106465
ENSSSCT00000036493	ENSSSCG00000006719	HSD3B1	chr4:111555565-111564192	21.4874	46.2715	-1.10663	0.000213164	0.0112968
ENSSSCT00000023144	ENSSSCG00000028558	SGPP1	chr1:216298036-216383873	27.5468	62.1982	-1.17499	2.22931e-05	0.00187963
ENSSSCT00000033796	ENSSSCG00000012277	TIMP1	chrX:47336628-47400702	4.4863	21.3464	-2.2504	0.000131833	0.00784439
ENSSSCT00000001551	ENSSSCG00000001414	CSNK2B	chr7:27466071-27474873	4.25642	22.694	-2.4146	6.15365e-06	0.000675933
ENSSSCT00000005078	ENSSSCG00000004597	AQP9	chr1:125897935-125953413	5.13038	12.2603	-1.25686	1.96765e-05	0.00170578
ENSSSCT00000035006	ENSSSCG00000022107	CHTOP	chr4:104889208-104898793	0	4.59642	#NAME?	0.000395206	0.0183282
ENSSSCT00000001744	ENSSSCG00000001565	-	GL893630.2:37126-44847	8.1993	26.9817	-1.71841	1.77727e-05	0.00157374
ENSSSCT00000033502	ENSSSCG00000005122	TEK	chr1:218224161-218500245	0	2.37551	#NAME?	5.931e-06	0.000656017
ENSSSCT00000029419	ENSSSCG00000029168	KIAA0430	GL895057.2:17822-53239	5.88265	12.0709	-1.03699	0.000493181	0.0214316
ENSSSCT00000008971	ENSSSCG00000008192	TMEM131	chr3:58923016-59040071	9.27746	17.101	-0.882276	0.00144987	0.046893
ENSSSCT00000004993	ENSSSCG00000004521	MRO	chr1:110207693-110280839	8.03189	69.4229	-3.1116	0	0
ENSSSCT00000017293	ENSSSCG00000015882	BAZ2B	chr15:73484138-73618436	0	6.20951	#NAME?	3.18479e-05	0.00251492
ENSSSCT00000022271	ENSSSCG00000006879	-	chr4:132800412-132846566	0	2.29255	#NAME?	5.7965e-05	0.00404411
ENSSSCT00000026121	ENSSSCG00000023080	TPP1	chr9:3792869-3800652	10.5836	21.9198	-1.0504	0.000215305	0.0113913
ENSSSCT00000009040	ENSSSCG00000008254	-	chr3:67119261-67408643	20.7901	49.1674	-1.2418	6.98209e-05	0.0046859
ENSSSCT00000032891	ENSSSCG00000016887	ITGA2	chr16:34164829-34265784	4.63209	9.38245	-1.0183	0.000467184	0.0206553
ENSSSCT00000019230	ENSSSCG00000017666	CH242-205G24.7	chr12:37171796-37193913	48.4833	102.548	-1.08074	0.000210596	0.0112075
ENSSSCT00000022969	ENSSSCG00000030369	KIAA1522	chr6:83106166-83114869	3.84845	8.29945	-1.10874	0.000358846	0.0170112
ENSSSCT00000019689	ENSSSCG00000018094	CYTB	chrMT:15341-16481	727.888	1719.41	-1.24012	0.00158681	0.0498183
ENSSSCT00000001583	ENSSSCG00000001435	AGPAT1	chr7:28022487-28036101	5.33255	12.277	-1.20306	0.000789485	0.0303595
ENSSSCT00000027939	ENSSSCG00000028018	EP400	chr14:24748335-24847567	0.793861	2.04159	-1.36274	0.00121317	0.0410158
ENSSSCT00000026210	ENSSSCG00000021774	B3GALNT1	chr13:109170832-109175561	41.9429	83.5931	-0.994956	0.00027964	0.0139906
ENSSSCT00000029306	ENSSSCG00000025005	B4GALT6	chr6:108153076-108219519	9.52991	22.089	-1.21279	1.68105e-05	0.00150959
ENSSSCT00000022676	ENSSSCG00000027622	-	chr8:72647989-72655891	7.58592	24.4557	-1.68878	0.00151764	0.0482438
ENSSSCT00000026009	ENSSSCG00000030544	TMEM143	chr6:49399425-49421692	0.98771	2.80357	-1.50511	0.00155041	0.0490941
ENSSSCT00000026008	ENSSSCG00000025567	-	chr3:5013716-5021792	45.5395	89.9345	-0.981758	0.000348946	0.0166448
ENSSSCT00000003907	ENSSSCG00000003517	-	chr6:73962558-73972414	80.2916	162.423	-1.01643	0.00114196	0.0395322
ENSSSCT00000003904	ENSSSCG00000003514	-	chr6:73920981-73947323	31.2168	61.7077	-0.983129	0.00077756	0.0300283
ENSSSCT00000000294	ENSSSCG00000000274	PCBP2	chr5:19112349-19134792	82.8959	192.301	-1.214	9.98094e-06	0.00100266
ENSSSCT00000011738	ENSSSCG00000010727	GPR26	chr14:144808491-144830835	0.0140023	3.11037	-7.79527	1.12404e-07	2.20941e-05
ENSSSCT00000014612	ENSSSCG00000013378	ABCC8	chr2:44725268-44812585	0.485213	2.30083	-2.24547	4.46771e-06	0.000515728
ENSSSCT00000013830	ENSSSCG00000012649	SMARCA1	chrX:121756239-121832582	0	0.936241	#NAME?	0.000605373	0.0249413
ENSSSCT00000013831	ENSSSCG00000012650	OCRL	chrX:121904423-121959210	2.33483	5.53907	-1.24633	0.000465256	0.0205988
ENSSSCT00000000748	ENSSSCG00000000687	CD4	chr5:66326562-66352898	0.279063	3.08641	-3.46727	7.10884e-06	0.000761102
ENSSSCT00000029919	ENSSSCG00000028058	CCDC69	chr16:78027655-78054985	0.238156	5.02428	-4.39894	9.54348e-13	9.01611e-10
ENSSSCT00000007487	ENSSSCG00000006836	KIAA1324	chr4:121378121-121448363	19.8622	71.4889	-1.8477	3.15792e-11	1.83939e-08
ENSSSCT00000002557	ENSSSCG00000002296	RDH11	chr7:97722349-97759848	35.2643	107.094	-1.60259	1.47212e-08	3.97717e-06
ENSSSCT00000002558	ENSSSCG00000002297	RDH12	chr7:97788543-97803846	10.8508	36.3364	-1.74361	3.67029e-10	1.52303e-07
ENSSSCT00000005290	ENSSSCG00000004791	RASGRP1	chr1:148187751-148270286	13.4645	35.7904	-1.41042	4.16564e-07	6.86941e-05
ENSSSCT00000013058	ENSSSCG00000011934	PLCXD2	chr13:158964494-159012121	1.10108	4.86928	-2.1448	0.000824874	0.0313971
ENSSSCT00000003939	ENSSSCG00000003546	-	chr6:75996930-75997332	5.1521	137.45	-4.7376	1.33227e-15	3.67758e-12
ENSSSCT00000036076	ENSSSCG00000012229	CYBB	chrX:37303173-37392877	3.78604	10.2358	-1.43487	0.00121989	0.0411662
ENSSSCT00000005162	ENSSSCG00000004676	DUOXA2	chr1:141201515-141205257	10.385	27.7817	-1.41964	2.48571e-05	0.00205756
ENSSSCT00000013393	ENSSSCG00000012247	ATP6AP2	chrX:40369353-40398502	6.03947	15.7814	-1.38573	0.00020353	0.0109492
ENSSSCT00000009732	ENSSSCG00000008889	NPY5R	chr8:55309149-55310490	0.104006	1.35269	-3.7011	0.00105628	0.0374859
ENSSSCT00000019660	ENSSSCG00000018065	ND1	chrMT:3921-4878	302.624	670.575	-1.14787	0.000139372	0.00818557
ENSSSCT00000008762	ENSSSCG00000007995	FAM195A	chr3:41348588-41353426	301.802	646.694	-1.09948	0.000176448	0.00980096
ENSSSCT00000025743	ENSSSCG00000024089	C5orf30	chr2:112821400-112822024	26.4385	62.2481	-1.23539	0.000583165	0.0242943
ENSSSCT00000006590	ENSSSCG00000020707	TNFRSF11B	chr4:21129675-21158444	0.801574	2.77563	-1.79191	0.00147883	0.0476837
ENSSSCT00000031994	ENSSSCG00000009834	ATXN2	chr14:34660726-34767837	0.8848	4.00707	-2.17912	2.94953e-05	0.0023555
ENSSSCT00000027781	ENSSSCG00000025610	AGAP3	chr18:6444842-6502045	0.371955	2.73302	-2.87729	8.39055e-06	0.000873292
ENSSSCT00000030451	ENSSSCG00000027410	CBFA2T2	chr17:41984967-42071429	0.0358489	4.8754	-7.08745	5.73046e-11	2.98214e-08
ENSSSCT00000026594	ENSSSCG00000021968	SLC19A3	chr15:142948414-142973548	0.0865222	1.56497	-4.17692	2.66466e-07	4.71244e-05
ENSSSCT00000017718	ENSSSCG00000016270	C2orf72	chr15:145450296-145460228	5.81019	18.4995	-1.67083	4.17317e-08	9.39541e-06
ENSSSCT00000006185	ENSSSCG00000005625	ENG	chr1:302232062-302266135	16.0256	32.4209	-1.01655	0.000311558	0.0152158
ENSSSCT00000002252	ENSSSCG00000002013	DHRS4	chr7:80512358-80525770	301.805	1411.03	-2.22506	4.02949e-10	1.62948e-07
ENSSSCT00000035226	ENSSSCG00000012130	FANCB	chrX:12339389-12361867	0	1.01342	#NAME?	0.000843452	0.0318749
ENSSSCT00000019051	ENSSSCG00000017498	PPP1R1B	chr12:23071449-23079034	6.17222	18.6917	-1.59853	4.93106e-05	0.00359222
ENSSSCT00000016637	ENSSSCG00000015268	FMO1	chr9:70137791-70171698	152.66	471.565	-1.62713	9.68551e-07	0.000140394
ENSSSCT00000016635	ENSSSCG00000015266	FMO4	chr9:70202768-70221216	13.4913	33.3507	-1.30569	5.36435e-05	0.00383102
ENSSSCT00000012476	ENSSSCG00000011398	SEMA3F	chr13:35820304-35849844	4.07218	8.60269	-1.07899	0.00121232	0.0410158
ENSSSCT00000008185	ENSSSCG00000007478	ATP9A	chr17:59377657-59514268	3.17028	6.95603	-1.13366	0.000242265	0.0124746
ENSSSCT00000017800	ENSSSCG00000016345	-	chr15:153160291-153194892	0.052949	10.2294	-7.5939	3.96427e-08	9.02106e-06
ENSSSCT00000004213	ENSSSCG00000003807	DNAJC6	chr6:135397187-135560153	7.00147	14.6388	-1.06407	0.000524691	0.0224626
ENSSSCT00000027549	ENSSSCG00000028691	SULT1C3	chr3:50008177-50034005	68.392	313.544	-2.19677	8.13793e-13	8.14785e-10
ENSSSCT00000031337	ENSSSCG00000027472	GCA	chr15:76510741-76545119	22.3546	41.6505	-0.897764	0.0010432	0.0371669
ENSSSCT00000003964	ENSSSCG00000003570	WDTC1	chr6:78055583-78105494	28.1578	52.3031	-0.893361	0.00125153	0.0419528
ENSSSCT00000033693	ENSSSCG00000011641	SLCO2A1	chr13:82615580-82624639	5.65451	19.3842	-1.77741	0.000632765	0.0257523
