# Supplementary material for: Systematic Analysis of Long Non-Coding RNAs and mRNAs in the Ovaries of Duroc Pigs During Different Follicular Stages Using RNA Sequencing
Source: Int J Mol Sci. 2018 Jun 11;19(6):1722. doi: 10.3390/ijms19061722 (PMC6032137; doi:10.3390/ijms19061722)
Supplement: Supplementary file 1 [file ijms-19-01722-s001.zip › Supplementary Table S5.xlsx]

## Sheet: Table S4
Systematic analysis of long non-coding RNAs and mRNAs in the ovaries of Duroc pigs during different follicular stages using RNA sequencing Yi Liu, Mengxun Li, Xinwen Bo, Li Tao, Lipeng Ma, Tenjiao Zhai, Tao Huang
Supplementary Table S5. The information of 6946 co_located-mRNAs corresponded to 2076 lncRNAs.
Chromosome	lncRNA_ID	lncRNA_Gene_ID	lncRNA_Gene_Symbol	lncRNA_Status	lncRNA_Start	lncRNA_End	lncRNA_Strand	mRNA_ID	mRNA_Gene_Id	mRNA_Gene_Symbol	mRNA_Gene_Description	mRNA_Start	mRNA_End	mRNA_Strand	Distance	Location	Target_KO_description
chr1	ALDBSSCT0000000907	ALDBSSCG0000000553	--	Annotated_lncRNA	200181448	200184643	-	ENSSSCT00000005531	ENSSSCG00000005015	SOS2	SOS Ras/Rho guanine nucleotide exchange factor 2 [Source:HGNC Symbol;Acc:HGNC:11188]	200268863	200355907	-	84219	downstream	--
chr17	ALDBSSCT0000005422	ALDBSSCG0000003281	--	Annotated_lncRNA	69072961	69075017	-	ENSSSCT00000022675	ENSSSCG00000025784	CDH4	cadherin 4, type 1, R-cadherin (retinal) [Source:HGNC Symbol;Acc:HGNC:1763]	68895866	68979179	+	93781	downstream	--
chr17	ALDBSSCT0000005422	ALDBSSCG0000003281	--	Annotated_lncRNA	69072961	69075017	-	ENSSSCT00000026530	ENSSSCG00000021825	RPS21	40S ribosomal protein S21 [Source:UniProtKB/Swiss-Prot;Acc:P63221]	69172955	69173861	+	97937	upstream	Spliceosome
chr17	ALDBSSCT0000005422	ALDBSSCG0000003281	--	Annotated_lncRNA	69072961	69075017	-	ENSSSCT00000028398	ENSSSCG00000026052	LSM14B	LSM family member 14B [Source:HGNC Symbol;Acc:HGNC:15887]	69083024	69090021	-	8006	downstream	--
chr17	ALDBSSCT0000005422	ALDBSSCG0000003281	--	Annotated_lncRNA	69072961	69075017	-	ENSSSCT00000024716	ENSSSCG00000024694	TAF4	TATA-box binding protein associated factor 4 [Source:HGNC Symbol;Acc:HGNC:11537]	68993803	69054750	-	18210	upstream	Olfactory transduction
chr17	ALDBSSCT0000005422	ALDBSSCG0000003281	--	Annotated_lncRNA	69072961	69075017	-	ENSSSCT00000027440	ENSSSCG00000028820	--	--	69093361	69105452	+	18343	upstream	HTLV-I infection,Viral myocarditis,Cell adhesion molecules (CAMs),Phagosome,Epstein-Barr virus infection,Graft-versus-host disease,Allograft rejection,Type I diabetes mellitus,Autoimmune thyroid disease,Viral carcinogenesis,Antigen processing and presentation,Herpes simplex infection,Endocytosis
chr17	ALDBSSCT0000005422	ALDBSSCG0000003281	--	Annotated_lncRNA	69072961	69075017	-	ENSSSCT00000031262	ENSSSCG00000024694	TAF4	TATA-box binding protein associated factor 4 [Source:HGNC Symbol;Acc:HGNC:11537]	69010095	69054750	-	18210	upstream	--
chr17	ALDBSSCT0000005422	ALDBSSCG0000003281	--	Annotated_lncRNA	69072961	69075017	-	ENSSSCT00000008272	ENSSSCG00000007540	CABLES2	Cdk5 and Abl enzyme substrate 2 [Source:HGNC Symbol;Acc:HGNC:16143]	69173975	69187538	-	98957	downstream	--
chr17	ALDBSSCT0000005422	ALDBSSCG0000003281	--	Annotated_lncRNA	69072961	69075017	-	ENSSSCT00000025728	ENSSSCG00000030630	PSMA7	proteasome subunit alpha 7 [Source:HGNC Symbol;Acc:HGNC:9536]	69075553	69079393	+	535	upstream	--
chr11	LNC_000217	XLOC_016186	--	Novel_lncRNA	34987528	34989765	-	ENSSSCT00000010359	ENSSSCG00000009449	--	--	34989510	35171272	+	-256	antisense	--
chr11	LNC_000216	XLOC_016167	--	Novel_lncRNA	26168882	26183972	-	ENSSSCT00000010342	ENSSSCG00000009435	NAA16	N(alpha)-acetyltransferase 16, NatA auxiliary subunit [Source:HGNC Symbol;Acc:HGNC:26164]	26247798	26312854	-	63825	downstream	--
chr11	LNC_000216	XLOC_016167	--	Novel_lncRNA	26168882	26183972	-	ENSSSCT00000010341	ENSSSCG00000009434	RGCC	response gene to complement 32 protein [Source:RefSeq peptide;Acc:NP_001231156]	26204988	26215014	-	21015	downstream	Transcriptional misregulation in cancer
chr11	LNC_000216	XLOC_016167	--	Novel_lncRNA	26168882	26183972	-	ENSSSCT00000031457	ENSSSCG00000024707	--	--	26091563	26155523	-	13358	upstream	--
chr11	LNC_000215	XLOC_016049	--	Novel_lncRNA	14710080	14710597	-	ENSSSCT00000010266	ENSSSCG00000009369	COG6	component of oligomeric golgi complex 6 [Source:HGNC Symbol;Acc:HGNC:18621]	14710678	14892681	+	80	upstream	Apoptosis,Insulin signaling pathway
chr17	ALDBSSCT0000005130	ALDBSSCG0000003087	--	Annotated_lncRNA	14918576	14933366	+	ENSSSCT00000024298	ENSSSCG00000023504	--	--	14843106	14859601	+	58974	downstream	--
chr17	ALDBSSCT0000005130	ALDBSSCG0000003087	--	Annotated_lncRNA	14918576	14933366	+	ENSSSCT00000026527	ENSSSCG00000026466	-	solute carrier family 23 member 2 [Source:RefSeq peptide;Acc:NP_999343]	14814401	14825321	-	93254	upstream	--
chr17	ALDBSSCT0000005130	ALDBSSCG0000003087	--	Annotated_lncRNA	14918576	14933366	+	ENSSSCT00000031721	ENSSSCG00000025844	--	--	14861570	14886817	+	31758	downstream	Propanoate metabolism
chr11	LNC_000213	XLOC_015492	--	Novel_lncRNA	48600857	48606807	+	ENSSSCT00000010367	ENSSSCG00000009457	--	--	48302561	48598619	-	2237	upstream	Propanoate metabolism
chr11	LNC_000212	XLOC_015423	--	Novel_lncRNA	19543477	19563631	+	ENSSSCT00000010300	ENSSSCG00000009401	RB1	retinoblastoma 1 [Source:HGNC Symbol;Acc:HGNC:9884]	19648338	19770798	-	84706	downstream	Neuroactive ligand-receptor interaction,cAMP signaling pathway
chr11	LNC_000212	XLOC_015423	--	Novel_lncRNA	19543477	19563631	+	ENSSSCT00000010299	ENSSSCG00000009400	RCBTB2	regulator of chromosome condensation (RCC1) and BTB (POZ) domain containing protein 2 [Source:HGNC Symbol;Acc:HGNC:1914]	19618738	19644075	+	55106	upstream	Spliceosome
chr11	LNC_000212	XLOC_015423	--	Novel_lncRNA	19543477	19563631	+	ENSSSCT00000010298	ENSSSCG00000009399	CYSLTR2	cysteinyl leukotriene receptor 2 [Source:RefSeq peptide;Acc:NP_999295]	19465520	19487745	+	55731	downstream	--
chr11	LNC_000211	XLOC_015410	--	Novel_lncRNA	18916105	18918868	+	ENSSSCT00000026092	ENSSSCG00000022159	--	--	18971010	19002966	+	52141	upstream	--
chr11	LNC_000211	XLOC_015410	--	Novel_lncRNA	18916105	18918868	+	ENSSSCT00000023584	ENSSSCG00000022623	CDADC1	cytidine and dCMP deaminase domain containing 1 [Source:HGNC Symbol;Acc:HGNC:20299]	18866090	18916064	-	40	upstream	--
chr11	LNC_000211	XLOC_015410	--	Novel_lncRNA	18916105	18918868	+	ENSSSCT00000031653	ENSSSCG00000022064	MLNR	motilin receptor [Source:HGNC Symbol;Acc:HGNC:4495]	18939616	18941688	-	20747	downstream	Vascular smooth muscle contraction,Platelet activation,Regulation of actin cytoskeleton,Axon guidance,Tuberculosis,Proteoglycans in cancer
chr11	LNC_000210	XLOC_015342	--	Novel_lncRNA	14651851	14660615	+	ENSSSCT00000028802	ENSSSCG00000029855	LHFP	lipoma HMGIC fusion partner [Source:HGNC Symbol;Acc:HGNC:6586]	14558884	14559276	+	92574	downstream	--
chr11	LNC_000210	XLOC_015342	--	Novel_lncRNA	14651851	14660615	+	ENSSSCT00000010266	ENSSSCG00000009369	COG6	component of oligomeric golgi complex 6 [Source:HGNC Symbol;Acc:HGNC:18621]	14710678	14892681	+	50062	upstream	Cell cycle,HTLV-I infection,Epstein-Barr virus infection,Bladder cancer,Non-small cell lung cancer,Viral carcinogenesis,Glioma,Pancreatic cancer,Melanoma,Chronic myeloid leukemia,Prostate cancer,Small cell lung cancer,Pathways in cancer,Hepatitis B
chr10	ALDBSSCT0000001124	ALDBSSCG0000000697	--	Annotated_lncRNA	11930984	11931694	+	ENSSSCT00000026014	ENSSSCG00000027748	--	--	11933317	11968657	-	1622	downstream	--
chr10	ALDBSSCT0000001124	ALDBSSCG0000000697	--	Annotated_lncRNA	11930984	11931694	+	ENSSSCT00000011842	ENSSSCG00000010824	RAB3GAP2	RAB3 GTPase activating non-catalytic protein subunit 2 [Source:HGNC Symbol;Acc:HGNC:17168]	11838697	11930420	+	563	downstream	Neuroactive ligand-receptor interaction,PI3K-Akt signaling pathway
chr16	ALDBSSCT0000004957	ALDBSSCG0000003000	--	Annotated_lncRNA	42881401	42882711	-	ENSSSCT00000025662	ENSSSCG00000027763	NDUFAF2	NADH:ubiquinone oxidoreductase complex assembly factor 2 [Source:HGNC Symbol;Acc:HGNC:28086]	42832716	42874957	+	6443	downstream	--
chr16	ALDBSSCT0000004957	ALDBSSCG0000003000	--	Annotated_lncRNA	42881401	42882711	-	ENSSSCT00000018443	ENSSSCG00000016935	SMIM15	small integral membrane protein 15 [Source:HGNC Symbol;Acc:HGNC:33861]	42880067	42880291	-	1109	upstream	--
chr18	ALDBSSCT0000005553	ALDBSSCG0000003361	--	Annotated_lncRNA	50987038	50991384	+	ENSSSCT00000027225	ENSSSCG00000026894	NFE2L3	nuclear factor, erythroid 2 like 3 [Source:HGNC Symbol;Acc:HGNC:7783]	50993767	51025144	-	2382	downstream	--
chr18	ALDBSSCT0000005553	ALDBSSCG0000003361	--	Annotated_lncRNA	50987038	50991384	+	ENSSSCT00000018192	ENSSSCG00000016711	CBX3	chromobox 3 [Source:HGNC Symbol;Acc:HGNC:1553]	50968278	50979509	-	7528	upstream	--
GL896420.2	LNC_000109	XLOC_005780	--	Novel_lncRNA	120	2831	-	ENSSSCT00000030182	ENSSSCG00000021541	DCAF5	DDB1 and CUL4 associated factor 5 [Source:HGNC Symbol;Acc:HGNC:20224]	5519	25071	-	2687	downstream	RNA transport
GL896412.1	LNC_000108	XLOC_005767	--	Novel_lncRNA	25078	25718	-	ENSSSCT00000026967	ENSSSCG00000020780	PRSS57	protease, serine 57 [Source:HGNC Symbol;Acc:HGNC:31397]	17775	22847	+	2230	downstream	--
chr1	ALDBSSCT0000000891	ALDBSSCG0000000540	--	Annotated_lncRNA	179547039	179571779	-	ENSSSCT00000005422	ENSSSCG00000004914	--	--	179500852	179501784	-	45254	upstream	--
chr1	ALDBSSCT0000000891	ALDBSSCG0000000540	--	Annotated_lncRNA	179547039	179571779	-	ENSSSCT00000005423	ENSSSCG00000004915	ZNF532	zinc finger protein 532 [Source:HGNC Symbol;Acc:HGNC:30940]	179453741	179458627	-	88411	upstream	--
chr1	ALDBSSCT0000000891	ALDBSSCG0000000540	--	Annotated_lncRNA	179547039	179571779	-	ENSSSCT00000034163	ENSSSCG00000004917	MALT1	MALT1 paracaspase [Source:HGNC Symbol;Acc:HGNC:6819]	179660460	179701310	+	88680	upstream	Taste transduction
chr1	ALDBSSCT0000000891	ALDBSSCG0000000540	--	Annotated_lncRNA	179547039	179571779	-	ENSSSCT00000005425	ENSSSCG00000004917	MALT1	MALT1 paracaspase [Source:HGNC Symbol;Acc:HGNC:6819]	179658938	179701160	+	87158	upstream	--
GL896104.1	LNC_000101	XLOC_005083	--	Novel_lncRNA	4862	6722	-	ENSSSCT00000028168	ENSSSCG00000023109	GNL2	guanine nucleotide binding protein-like 2 (nucleolar) [Source:HGNC Symbol;Acc:HGNC:29925]	16467	39848	-	9744	downstream	--
GL896104.1	LNC_000101	XLOC_005083	--	Novel_lncRNA	4862	6722	-	ENSSSCT00000030775	ENSSSCG00000022979	DNALI1	dynein, axonemal, light intermediate chain 1 [Source:HGNC Symbol;Acc:HGNC:14353]	7377	14758	+	654	upstream	--
GL895985.1	LNC_000100	XLOC_004944	--	Novel_lncRNA	6055	8253	+	ENSSSCT00000029895	ENSSSCG00000026124	TSTA3	tissue specific transplantation antigen P35B [Source:HGNC Symbol;Acc:HGNC:12390]	10613	14317	+	2359	upstream	--
GL896348.1	LNC_000107	XLOC_005619	--	Novel_lncRNA	34195	40371	-	ENSSSCT00000024501	ENSSSCG00000022432	CYP20A1	cytochrome P450 family 20 subfamily A member 1 [Source:HGNC Symbol;Acc:HGNC:20576]	9377	13551	-	20643	upstream	Cytokine-cytokine receptor interaction
GL896227.2	LNC_000106	XLOC_005310	--	Novel_lncRNA	11037	23481	-	ENSSSCT00000024644	ENSSSCG00000026755	KLF15	Kruppel-like factor 15 [Source:HGNC Symbol;Acc:HGNC:14536]	46622	52812	+	23140	upstream	--
GL896227.2	LNC_000105	XLOC_005309	--	Novel_lncRNA	86004	91080	+	ENSSSCT00000024644	ENSSSCG00000026755	KLF15	Kruppel-like factor 15 [Source:HGNC Symbol;Acc:HGNC:14536]	46622	52812	+	33191	downstream	--
GL896219.1	LNC_000104	XLOC_005267	--	Novel_lncRNA	4759	8652	+	ENSSSCT00000031425	ENSSSCG00000026140	S100B	S100 calcium binding protein B [Source:HGNC Symbol;Acc:HGNC:10500]	23649	28092	-	14996	downstream	Cytokine-cytokine receptor interaction
chr10	ALDBSSCT0000001128	ALDBSSCG0000000701	--	Annotated_lncRNA	14062764	14065076	+	ENSSSCT00000031842	ENSSSCG00000023289	GREM2	gremlin 2, DAN family BMP antagonist [Source:HGNC Symbol;Acc:HGNC:17655]	14103401	14103898	-	38324	downstream	--
chr10	ALDBSSCT0000001128	ALDBSSCG0000000701	--	Annotated_lncRNA	14062764	14065076	+	ENSSSCT00000011865	ENSSSCG00000010844	CHML	choroideremia-like (Rab escort protein 2) [Source:HGNC Symbol;Acc:HGNC:1941]	14057448	14059955	+	2808	downstream	--
chr10	ALDBSSCT0000001128	ALDBSSCG0000000701	--	Annotated_lncRNA	14062764	14065076	+	ENSSSCT00000011864	ENSSSCG00000010843	YWHAZ	tyrosine 3-monooxygenase/tryptophan 5-monooxygenase activation protein, zeta [Source:HGNC Symbol;Acc:HGNC:12855]	14071143	14071848	-	6066	downstream	--
chr10	ALDBSSCT0000001128	ALDBSSCG0000000701	--	Annotated_lncRNA	14062764	14065076	+	ENSSSCT00000011863	ENSSSCG00000010842	--	--	14073173	14079400	-	8096	downstream	--
chr10	ALDBSSCT0000001128	ALDBSSCG0000000701	--	Annotated_lncRNA	14062764	14065076	+	ENSSSCT00000011858	ENSSSCG00000010839	--	--	14012392	14043574	-	19189	upstream	--
chr17	ALDBSSCT0000005132	ALDBSSCG0000003088	--	Annotated_lncRNA	16315809	16336824	+	ENSSSCT00000007669	ENSSSCG00000026090	--	--	16260942	16265124	-	50684	upstream	--
chr17	ALDBSSCT0000005132	ALDBSSCG0000003088	--	Annotated_lncRNA	16315809	16336824	+	ENSSSCT00000007706	ENSSSCG00000007037	--	--	16367438	16379437	-	30613	downstream	--
chr2	ALDBSSCT0000006047	ALDBSSCG0000003702	--	Annotated_lncRNA	142447471	142462284	+	ENSSSCT00000015629	ENSSSCG00000014305	SAR1B	GTP-binding protein SAR1b [Source:UniProtKB/Swiss-Prot;Acc:Q5PYH3]	142463692	142489104	-	1407	downstream	Dorso-ventral axis formation,Transcriptional misregulation in cancer
chr2	ALDBSSCT0000006047	ALDBSSCG0000003702	--	Annotated_lncRNA	142447471	142462284	+	ENSSSCT00000015628	ENSSSCG00000014304	SEC24A	SEC24 homolog A, COPII coat complex component [Source:HGNC Symbol;Acc:HGNC:10703]	142498900	142565796	+	36615	upstream	Spliceosome
chr2	ALDBSSCT0000006047	ALDBSSCG0000003702	--	Annotated_lncRNA	142447471	142462284	+	ENSSSCT00000015625	ENSSSCG00000014302	CDKL3	cyclin-dependent kinase-like 3 [Source:HGNC Symbol;Acc:HGNC:15483]	142212363	142349006	-	98464	upstream	--
chr2	ALDBSSCT0000006047	ALDBSSCG0000003702	--	Annotated_lncRNA	142447471	142462284	+	ENSSSCT00000015626	ENSSSCG00000014303	JADE2	jade family PHD finger 2 [Source:HGNC Symbol;Acc:HGNC:22984]	142398393	142446363	+	1107	downstream	--
chr2	ALDBSSCT0000006043	ALDBSSCG0000003699	--	Annotated_lncRNA	140258327	140267757	+	ENSSSCT00000015603	ENSSSCG00000014280	RAD50	RAD50 homolog, double strand break repair protein [Source:HGNC Symbol;Acc:HGNC:9816]	140313725	140407470	+	45967	upstream	--
chr2	ALDBSSCT0000006043	ALDBSSCG0000003699	--	Annotated_lncRNA	140258327	140267757	+	ENSSSCT00000015601	ENSSSCG00000014278	IL5	interleukin 5 [Source:HGNC Symbol;Acc:HGNC:6016]	140301708	140303645	-	33950	downstream	--
chr2	ALDBSSCT0000006043	ALDBSSCG0000003699	--	Annotated_lncRNA	140258327	140267757	+	ENSSSCT00000015600	ENSSSCG00000014277	IRF1	Interferon regulatory factor 1 [Source:UniProtKB/Swiss-Prot;Acc:A0FIN4]	140229794	140252687	-	5639	upstream	--
chr1	ALDBSSCT0000000659	ALDBSSCG0000000395	--	Annotated_lncRNA	17415816	17417300	-	ENSSSCT00000004522	ENSSSCG00000004091	AKAP12	A-kinase anchoring protein 12 [Source:HGNC Symbol;Acc:HGNC:370]	17317257	17322146	-	93669	upstream	Apoptosis,Hepatitis B,RIG-I-like receptor signaling pathway,Tuberculosis,Alzheimer's disease,Herpes simplex infection,Pathways in cancer,Toll-like receptor signaling pathway,Chagas disease (American trypanosomiasis),TNF signaling pathway
chr1	ALDBSSCT0000000658	ALDBSSCG0000000394	--	Annotated_lncRNA	17264640	17267867	-	ENSSSCT00000004519	ENSSSCG00000004088	ARMT1	acidic residue methyltransferase 1 [Source:HGNC Symbol;Acc:HGNC:17872]	17190304	17206622	-	58017	upstream	--
chr1	ALDBSSCT0000000658	ALDBSSCG0000000394	--	Annotated_lncRNA	17264640	17267867	-	ENSSSCT00000004520	ENSSSCG00000004089	RMND1	required for meiotic nuclear division 1 homolog [Source:HGNC Symbol;Acc:HGNC:21176]	17207038	17262700	+	1939	downstream	Apoptosis,Hepatitis B,RIG-I-like receptor signaling pathway,Tuberculosis,Alzheimer's disease,Herpes simplex infection,Pathways in cancer,Toll-like receptor signaling pathway,Chagas disease (American trypanosomiasis),TNF signaling pathway
chr1	ALDBSSCT0000000658	ALDBSSCG0000000394	--	Annotated_lncRNA	17264640	17267867	-	ENSSSCT00000004521	ENSSSCG00000004090	ZBTB2	zinc finger and BTB domain containing 2 [Source:HGNC Symbol;Acc:HGNC:20868]	17296719	17305906	+	28851	upstream	--
chr1	ALDBSSCT0000000658	ALDBSSCG0000000394	--	Annotated_lncRNA	17264640	17267867	-	ENSSSCT00000004522	ENSSSCG00000004091	AKAP12	A-kinase anchoring protein 12 [Source:HGNC Symbol;Acc:HGNC:370]	17317257	17322146	-	49389	downstream	--
chr10	ALDBSSCT0000001250	ALDBSSCG0000000757	--	Annotated_lncRNA	48120915	48122151	+	ENSSSCT00000012074	ENSSSCG00000011032	-	tRNA (cytosine-5-)-methyltransferase [Source:RefSeq peptide;Acc:NP_001156357]	48148987	48157074	-	26835	downstream	--
chr10	ALDBSSCT0000001250	ALDBSSCG0000000757	--	Annotated_lncRNA	48120915	48122151	+	ENSSSCT00000028490	ENSSSCG00000028835	--	--	48033387	48073482	+	47432	downstream	--
chr10	ALDBSSCT0000001256	ALDBSSCG0000000761	--	Annotated_lncRNA	49906993	49908735	+	ENSSSCT00000012086	ENSSSCG00000011042	--	--	49841363	49844677	-	62315	upstream	--
chr10	ALDBSSCT0000001258	ALDBSSCG0000000763	--	Annotated_lncRNA	51940698	51944511	+	ENSSSCT00000012099	ENSSSCG00000011055	MRPL51	mitochondrial ribosomal protein L51 [Source:HGNC Symbol;Acc:HGNC:14044]	51914405	51914796	+	25901	downstream	--
chr10	ALDBSSCT0000001258	ALDBSSCG0000000763	--	Annotated_lncRNA	51940698	51944511	+	ENSSSCT00000023843	ENSSSCG00000011055	MRPL51	mitochondrial ribosomal protein L51 [Source:HGNC Symbol;Acc:HGNC:14044]	51914409	51914796	+	25901	downstream	--
chr1	ALDBSSCT0000000657	ALDBSSCG0000000393	--	Annotated_lncRNA	16908387	16918832	-	ENSSSCT00000035869	ENSSSCG00000025777	ESR1	estrogen receptor [Source:RefSeq peptide;Acc:NP_999385]	16870879	16871069	-	37317	upstream	Nitrogen metabolism
chr1	ALDBSSCT0000000657	ALDBSSCG0000000393	--	Annotated_lncRNA	16908387	16918832	-	ENSSSCT00000004517	ENSSSCG00000025777	ESR1	estrogen receptor [Source:RefSeq peptide;Acc:NP_999385]	16904677	16907255	-	1131	upstream	--
chrX	ALDBSSCT0000011958	ALDBSSCG0000007278	--	Annotated_lncRNA	103841191	103844939	+	ENSSSCT00000013749	ENSSSCG00000012574	AMMECR1	Alport syndrome, mental retardation, midface hypoplasia and elliptocytosis chromosomal region gene 1 [Source:HGNC Symbol;Acc:HGNC:467]	103860295	103975625	-	15355	downstream	--
chr6	ALDBSSCT0000009340	ALDBSSCG0000005696	--	Annotated_lncRNA	51913729	51917512	-	ENSSSCT00000003604	ENSSSCG00000003244	--	--	51959390	51992422	-	41877	downstream	--
chr6	ALDBSSCT0000009340	ALDBSSCG0000005696	--	Annotated_lncRNA	51913729	51917512	-	ENSSSCT00000003595	ENSSSCG00000003236	SIGLEC5	-	51805504	51825376	-	88352	upstream	MAPK signaling pathway
chr6	ALDBSSCT0000009340	ALDBSSCG0000005696	--	Annotated_lncRNA	51913729	51917512	-	ENSSSCT00000003596	ENSSSCG00000003238	--	--	51859123	51867873	+	45855	downstream	--
chr6	ALDBSSCT0000009340	ALDBSSCG0000005696	--	Annotated_lncRNA	51913729	51917512	-	ENSSSCT00000003597	ENSSSCG00000003238	--	--	51859123	51868585	+	45143	downstream	--
chr6	ALDBSSCT0000009340	ALDBSSCG0000005696	--	Annotated_lncRNA	51913729	51917512	-	ENSSSCT00000003598	ENSSSCG00000003239	HAS1	hyaluronan synthase 1 [Source:HGNC Symbol;Acc:HGNC:4818]	51877028	51883413	-	30315	upstream	--
chr6	ALDBSSCT0000009340	ALDBSSCG0000005696	--	Annotated_lncRNA	51913729	51917512	-	ENSSSCT00000003599	ENSSSCG00000003240	--	--	51907469	51911185	-	2543	upstream	--
chr6	ALDBSSCT0000009340	ALDBSSCG0000005696	--	Annotated_lncRNA	51913729	51917512	-	ENSSSCT00000003603	ENSSSCG00000003243	--	--	52011706	52051380	+	94193	upstream	--
chr6	ALDBSSCT0000009340	ALDBSSCG0000005696	--	Annotated_lncRNA	51913729	51917512	-	ENSSSCT00000032413	ENSSSCG00000024518	--	--	51831633	51835159	-	78569	upstream	--
chr6	ALDBSSCT0000009341	ALDBSSCG0000005697	--	Annotated_lncRNA	51995849	52001371	-	ENSSSCT00000003604	ENSSSCG00000003244	--	--	51959390	51992422	-	3426	upstream	--
chr6	ALDBSSCT0000009341	ALDBSSCG0000005697	--	Annotated_lncRNA	51995849	52001371	-	ENSSSCT00000003599	ENSSSCG00000003240	--	--	51907469	51911185	-	84663	upstream	--
chr6	ALDBSSCT0000009341	ALDBSSCG0000005697	--	Annotated_lncRNA	51995849	52001371	-	ENSSSCT00000003600	ENSSSCG00000003241	ZNF614	zinc finger protein 614 [Source:HGNC Symbol;Acc:HGNC:24722]	52086596	52088047	+	85224	upstream	--
chr6	ALDBSSCT0000009341	ALDBSSCG0000005697	--	Annotated_lncRNA	51995849	52001371	-	ENSSSCT00000003603	ENSSSCG00000003243	--	--	52011706	52051380	+	10334	upstream	--
chr3	ALDBSSCT0000006950	ALDBSSCG0000004220	--	Annotated_lncRNA	135824304	135825585	+	ENSSSCT00000009458	ENSSSCG00000008645	ID2	DNA-binding protein inhibitor ID-2 [Source:UniProtKB/Swiss-Prot;Acc:Q2VIU1]	135801780	135804369	-	19934	upstream	--
chr3	ALDBSSCT0000006950	ALDBSSCG0000004220	--	Annotated_lncRNA	135824304	135825585	+	ENSSSCT00000009457	ENSSSCG00000008644	KIDINS220	kinase D-interacting substrate 220kDa [Source:HGNC Symbol;Acc:HGNC:29508]	135751097	135775896	+	48407	downstream	--
chr8	ALDBSSCT0000010864	ALDBSSCG0000006581	--	Annotated_lncRNA	58014703	58019820	-	ENSSSCT00000009747	ENSSSCG00000008903	KIAA1211	KIAA1211 [Source:HGNC Symbol;Acc:HGNC:29219]	57919107	57976230	-	38472	upstream	--
chr8	ALDBSSCT0000010861	ALDBSSCG0000006578	--	Annotated_lncRNA	57599828	57605613	-	ENSSSCT00000024913	ENSSSCG00000026320	SPINK2	serine peptidase inhibitor, Kazal type 2 (acrosin-trypsin inhibitor) [Source:HGNC Symbol;Acc:HGNC:11245]	57511318	57518482	+	81345	downstream	--
chr8	ALDBSSCT0000010861	ALDBSSCG0000006578	--	Annotated_lncRNA	57599828	57605613	-	ENSSSCT00000009741	ENSSSCG00000008898	HOPX	HOP homeobox [Source:HGNC Symbol;Acc:HGNC:24961]	57628888	57634389	+	23274	upstream	--
chr7	ALDBSSCT0000010316	ALDBSSCG0000006274	--	Annotated_lncRNA	122222654	122224641	-	ENSSSCT00000002742	ENSSSCG00000002470	--	--	122186509	122207081	-	15572	upstream	--
chr7	ALDBSSCT0000010316	ALDBSSCG0000006274	--	Annotated_lncRNA	122222654	122224641	-	ENSSSCT00000002743	ENSSSCG00000002471	ISG12(A)	interferon, alpha-inducible protein 27 [Source:HGNC Symbol;Acc:HGNC:5397]	122215478	122220545	+	2108	downstream	--
chr7	ALDBSSCT0000010316	ALDBSSCG0000006274	--	Annotated_lncRNA	122222654	122224641	-	ENSSSCT00000002741	ENSSSCG00000002469	OTUB2	OTU deubiquitinase, ubiquitin aldehyde binding 2 [Source:HGNC Symbol;Acc:HGNC:20351]	122163461	122182984	+	39669	downstream	--
chr7	ALDBSSCT0000010316	ALDBSSCG0000006274	--	Annotated_lncRNA	122222654	122224641	-	ENSSSCT00000002745	ENSSSCG00000002472	IFI27L2	interferon, alpha-inducible protein 27-like 2 [Source:HGNC Symbol;Acc:HGNC:19753]	122228313	122229025	-	3671	downstream	--
chr9	ENSSSCT00000021723	ENSSSCG00000020128	7SK	Annotated_lncRNA	138727106	138727335	+	ENSSSCT00000029214	ENSSSCG00000021393	TRMT1L	tRNA methyltransferase 1 like [Source:HGNC Symbol;Acc:HGNC:16782]	138749256	138793166	-	21920	downstream	Base excision repair
chr9	ENSSSCT00000021723	ENSSSCG00000020128	7SK	Annotated_lncRNA	138727106	138727335	+	ENSSSCT00000016960	ENSSSCG00000015569	SWT1	SWT1, RNA endoribonuclease homolog [Source:HGNC Symbol;Acc:HGNC:16785]	138793225	138899857	+	65889	upstream	--
chr9	ENSSSCT00000021723	ENSSSCG00000020128	7SK	Annotated_lncRNA	138727106	138727335	+	ENSSSCT00000016959	ENSSSCG00000015568	RNF2	ring finger protein 2 [Source:HGNC Symbol;Acc:HGNC:10061]	138670291	138732074	+	-230	sense_overlapping	--
chr10	ALDBSSCT0000001413	ALDBSSCG0000000856	--	Annotated_lncRNA	13669071	13737338	-	ENSSSCT00000011856	ENSSSCG00000010837	FAM177B	family with sequence similarity 177 member B [Source:HGNC Symbol;Acc:HGNC:34395]	13763841	13772545	-	26502	downstream	--
chr10	ALDBSSCT0000001413	ALDBSSCG0000000856	--	Annotated_lncRNA	13669071	13737338	-	ENSSSCT00000011854	ENSSSCG00000010835	AIDA	axin interactor, dorsalization associated [Source:HGNC Symbol;Acc:HGNC:25761]	13586602	13621298	-	47772	upstream	--
chr10	ALDBSSCT0000001413	ALDBSSCG0000000856	--	Annotated_lncRNA	13669071	13737338	-	ENSSSCT00000011855	ENSSSCG00000010836	BROX	BRO1 domain and CAAX motif containing [Source:HGNC Symbol;Acc:HGNC:26512]	13624315	13636566	+	32504	downstream	--
chr10	ALDBSSCT0000001413	ALDBSSCG0000000856	--	Annotated_lncRNA	13669071	13737338	-	ENSSSCT00000011852	ENSSSCG00000010834	MIA3	melanoma inhibitory activity family member 3 [Source:HGNC Symbol;Acc:HGNC:24008]	13487025	13583457	+	85613	downstream	--
chr8	ALDBSSCT0000010798	ALDBSSCG0000006532	--	Annotated_lncRNA	20838193	20847553	-	ENSSSCT00000009586	ENSSSCG00000008761	TBC1D19	TBC1 domain family member 19 [Source:HGNC Symbol;Acc:HGNC:25624]	20629601	20747793	+	90399	downstream	MicroRNAs in cancer
chr4	ALDBSSCT0000007800	ALDBSSCG0000004723	--	Annotated_lncRNA	141915070	142011197	+	ENSSSCT00000007594	ENSSSCG00000006932	--	--	142080450	142110266	-	69252	downstream	Neuroactive ligand-receptor interaction,Nicotine addiction,GABAergic synapse,Morphine addiction,Retrograde endocannabinoid signaling
chr4	ALDBSSCT0000007800	ALDBSSCG0000004723	--	Annotated_lncRNA	141915070	142011197	+	ENSSSCT00000007592	ENSSSCG00000006930	SH3GLB1	SH3-domain GRB2-like endophilin B1 [Source:HGNC Symbol;Acc:HGNC:10833]	141809641	141843397	-	71672	upstream	--
chr4	ALDBSSCT0000007800	ALDBSSCG0000004723	--	Annotated_lncRNA	141915070	142011197	+	ENSSSCT00000007593	ENSSSCG00000006931	--	--	142051733	142055214	-	40535	downstream	--
chr1	ALDBSSCT0000000275	ALDBSSCG0000000161	--	Annotated_lncRNA	137503449	137507949	+	ENSSSCT00000005145	ENSSSCG00000004659	SLC12A1	solute carrier family 12 (sodium/potassium/chloride transporter), member 1 [Source:HGNC Symbol;Acc:HGNC:10910]	137510941	137599735	-	2991	downstream	--
chr1	ALDBSSCT0000000275	ALDBSSCG0000000161	--	Annotated_lncRNA	137503449	137507949	+	ENSSSCT00000028351	ENSSSCG00000026096	DUT	deoxyuridine triphosphatase [Source:HGNC Symbol;Acc:HGNC:3078]	137480812	137482271	-	21177	upstream	--
chr1	ALDBSSCT0000000272	ALDBSSCG0000000161	--	Annotated_lncRNA	137493050	137507949	+	ENSSSCT00000005145	ENSSSCG00000004659	SLC12A1	solute carrier family 12 (sodium/potassium/chloride transporter), member 1 [Source:HGNC Symbol;Acc:HGNC:10910]	137510941	137599735	-	2991	downstream	--
chr1	ALDBSSCT0000000272	ALDBSSCG0000000161	--	Annotated_lncRNA	137493050	137507949	+	ENSSSCT00000028351	ENSSSCG00000026096	DUT	deoxyuridine triphosphatase [Source:HGNC Symbol;Acc:HGNC:3078]	137480812	137482271	-	10778	upstream	--
chr7	ALDBSSCT0000009611	ALDBSSCG0000005862	--	Annotated_lncRNA	2440658	2441802	+	ENSSSCT00000001093	ENSSSCG00000001001	C6orf201	chromosome 6 open reading frame 201 [Source:HGNC Symbol;Acc:HGNC:21620]	2500336	2513359	+	58533	upstream	--
chr7	ALDBSSCT0000009611	ALDBSSCG0000005862	--	Annotated_lncRNA	2440658	2441802	+	ENSSSCT00000001092	ENSSSCG00000001000	ECI2	enoyl-CoA delta isomerase 2, mitochondrial [Source:RefSeq peptide;Acc:NP_001106914]	2506301	2523592	-	64498	downstream	Axon guidance,PI3K-Akt signaling pathway,Rap1 signaling pathway,Ras signaling pathway
chr7	ALDBSSCT0000009611	ALDBSSCG0000005862	--	Annotated_lncRNA	2440658	2441802	+	ENSSSCT00000028061	ENSSSCG00000026323	FAM50B	family with sequence similarity 50 member B [Source:HGNC Symbol;Acc:HGNC:18789]	2371717	2372697	+	67960	downstream	FoxO signaling pathway,PI3K-Akt signaling pathway,mTOR signaling pathway,Adipocytokine signaling pathway,AMPK signaling pathway
chr7	ALDBSSCT0000009611	ALDBSSCG0000005862	--	Annotated_lncRNA	2440658	2441802	+	ENSSSCT00000001094	ENSSSCG00000001002	PRPF4B	pre-mRNA processing factor 4B [Source:HGNC Symbol;Acc:HGNC:17346]	2455403	2471801	-	13600	downstream	--
chr8	LNC_000636	XLOC_058350	--	Novel_lncRNA	2703242	2723944	-	ENSSSCT00000009529	ENSSSCG00000008710	JAKMIP1	janus kinase and microtubule interacting protein 1 [Source:HGNC Symbol;Acc:HGNC:26460]	2813115	2851074	+	89170	upstream	--
chr1	ALDBSSCT0000000420	ALDBSSCG0000000248	--	Annotated_lncRNA	212183975	212186249	+	ENSSSCT00000005619	ENSSSCG00000005097	SNAPC1	small nuclear RNA activating complex polypeptide 1 [Source:HGNC Symbol;Acc:HGNC:11134]	212192279	212218544	+	6029	upstream	--
chr1	ALDBSSCT0000000420	ALDBSSCG0000000248	--	Annotated_lncRNA	212183975	212186249	+	ENSSSCT00000005618	ENSSSCG00000005096	HIF1A	hypoxia inducible factor 1, alpha subunit (basic helix-loop-helix transcription factor) [Source:HGNC Symbol;Acc:HGNC:4910]	212130958	212179888	+	4086	downstream	--
chr9	ALDBSSCT0000011138	ALDBSSCG0000006756	--	Annotated_lncRNA	32511839	32566579	+	ENSSSCT00000016334	ENSSSCG00000014972	CCDC82	coiled-coil domain containing 82 [Source:HGNC Symbol;Acc:HGNC:26282]	32410090	32435117	-	76721	upstream	--
chr9	ALDBSSCT0000011137	ALDBSSCG0000006756	--	Annotated_lncRNA	32511723	32564373	+	ENSSSCT00000016334	ENSSSCG00000014972	CCDC82	coiled-coil domain containing 82 [Source:HGNC Symbol;Acc:HGNC:26282]	32410090	32435117	-	76605	upstream	Alzheimer's disease,Oxidative phosphorylation,Parkinson's disease,Huntington's disease,Metabolic pathways
chr9	ALDBSSCT0000011135	ALDBSSCG0000006756	--	Annotated_lncRNA	32511560	32566579	+	ENSSSCT00000016334	ENSSSCG00000014972	CCDC82	coiled-coil domain containing 82 [Source:HGNC Symbol;Acc:HGNC:26282]	32410090	32435117	-	76442	upstream	--
chr7	ALDBSSCT0000010088	ALDBSSCG0000006141	--	Annotated_lncRNA	24706151	24706857	-	ENSSSCT00000001341	ENSSSCG00000001233	TRIM26	tripartite motif containing 26 [Source:HGNC Symbol;Acc:HGNC:12962]	24795834	24820308	+	88976	upstream	--
chr7	ALDBSSCT0000010088	ALDBSSCG0000006141	--	Annotated_lncRNA	24706151	24706857	-	ENSSSCT00000001334	ENSSSCG00000001231	SLA-1	-	24748105	24751642	-	41247	downstream	Pathways in cancer,Regulation of actin cytoskeleton,HTLV-I infection,Endometrial cancer,Basal cell carcinoma,Colorectal cancer,MicroRNAs in cancer,Wnt signaling pathway,Signaling pathways regulating pluripotency of stem cells,Hippo signaling pathway
chr7	ALDBSSCT0000010088	ALDBSSCG0000006141	--	Annotated_lncRNA	24706151	24706857	-	ENSSSCT00000001330	ENSSSCG00000001229	TMP-CH242-74M17.2	-	24683605	24687174	-	18976	upstream	--
chr7	ALDBSSCT0000010088	ALDBSSCG0000006141	--	Annotated_lncRNA	24706151	24706857	-	ENSSSCT00000036412	ENSSSCG00000001231	SLA-1	-	24748105	24751627	-	41247	downstream	Ribosome
chr7	ALDBSSCT0000010088	ALDBSSCG0000006141	--	Annotated_lncRNA	24706151	24706857	-	ENSSSCT00000001329	ENSSSCG00000001229	TMP-CH242-74M17.2	-	24683607	24687412	-	18738	upstream	--
chr7	ALDBSSCT0000010088	ALDBSSCG0000006141	--	Annotated_lncRNA	24706151	24706857	-	ENSSSCT00000001339	ENSSSCG00000001232	CH242-196B23.2	-	24770594	24781751	-	63736	downstream	--
chr7	ALDBSSCT0000009749	ALDBSSCG0000005948	--	Annotated_lncRNA	44057391	44076573	+	ENSSSCT00000028506	ENSSSCG00000028007	POLR1C	polymerase (RNA) I polypeptide C [Source:HGNC Symbol;Acc:HGNC:20194]	44092580	44114978	+	16006	upstream	--
chr7	ALDBSSCT0000009749	ALDBSSCG0000005948	--	Annotated_lncRNA	44057391	44076573	+	ENSSSCT00000001884	ENSSSCG00000001688	--	--	44077255	44082602	+	681	upstream	--
chr7	ALDBSSCT0000009749	ALDBSSCG0000005948	--	Annotated_lncRNA	44057391	44076573	+	ENSSSCT00000001874	ENSSSCG00000001679	--	--	44112974	44151883	-	36400	downstream	--
chr7	ALDBSSCT0000009749	ALDBSSCG0000005948	--	Annotated_lncRNA	44057391	44076573	+	ENSSSCT00000001877	ENSSSCG00000001682	-	Protein delta homolog 2 [Source:UniProtKB/Swiss-Prot;Acc:B2LW77]	44034941	44039292	-	18098	upstream	Ubiquitin mediated proteolysis
chr7	ALDBSSCT0000009749	ALDBSSCG0000005948	--	Annotated_lncRNA	44057391	44076573	+	ENSSSCT00000001876	ENSSSCG00000001681	--	--	44031796	44034508	+	22882	downstream	--
chr7	ALDBSSCT0000009749	ALDBSSCG0000005948	--	Annotated_lncRNA	44057391	44076573	+	ENSSSCT00000001870	ENSSSCG00000001676	LRRC73	leucine rich repeat containing 73 [Source:HGNC Symbol;Acc:HGNC:21375]	44083009	44086372	-	6435	downstream	Platelet activation,Regulation of actin cytoskeleton,Leukocyte transendothelial migration,Focal adhesion
chr7	ALDBSSCT0000009749	ALDBSSCG0000005948	--	Annotated_lncRNA	44057391	44076573	+	ENSSSCT00000001882	ENSSSCG00000001686	YIPF3	Yip1 domain family member 3 [Source:HGNC Symbol;Acc:HGNC:21023]	44087684	44092540	-	11110	downstream	--
chr7	ALDBSSCT0000009749	ALDBSSCG0000005948	--	Annotated_lncRNA	44057391	44076573	+	ENSSSCT00000001879	ENSSSCG00000001683	POLH	polymerase (DNA directed), eta [Source:HGNC Symbol;Acc:HGNC:9181]	44152193	44184675	+	75619	upstream	--
chr7	ALDBSSCT0000009749	ALDBSSCG0000005948	--	Annotated_lncRNA	44057391	44076573	+	ENSSSCT00000001869	ENSSSCG00000001675	--	--	43960917	43967154	-	90236	upstream	Amino sugar and nucleotide sugar metabolism
chr7	ALDBSSCT0000010081	ALDBSSCG0000006137	--	Annotated_lncRNA	22478372	22480123	-	ENSSSCT00000001259	ENSSSCG00000001161	--	--	22525412	22526344	+	45288	upstream	Endocytosis
chr7	ALDBSSCT0000010081	ALDBSSCG0000006137	--	Annotated_lncRNA	22478372	22480123	-	ENSSSCT00000023495	ENSSSCG00000021863	--	--	22473137	22474072	+	4299	downstream	Glycosphingolipid biosynthesis - globo series,Metabolic pathways
chr7	ALDBSSCT0000010081	ALDBSSCG0000006137	--	Annotated_lncRNA	22478372	22480123	-	ENSSSCT00000001251	ENSSSCG00000027958	--	--	22544483	22547649	-	64359	downstream	Glycosaminoglycan biosynthesis - heparan sulfate / heparin
chr7	ALDBSSCT0000010081	ALDBSSCG0000006137	--	Annotated_lncRNA	22478372	22480123	-	ENSSSCT00000001255	ENSSSCG00000001157	--	--	22459943	22461030	-	17341	upstream	Glutamatergic synapse,FoxO signaling pathway
chr7	ALDBSSCT0000010081	ALDBSSCG0000006137	--	Annotated_lncRNA	22478372	22480123	-	ENSSSCT00000001254	ENSSSCG00000001156	ZNF322	zinc finger protein 322 [Source:HGNC Symbol;Acc:HGNC:23640]	22517688	22520174	+	37564	upstream
chr7	ALDBSSCT0000010081	ALDBSSCG0000006137	--	Annotated_lncRNA	22478372	22480123	-	ENSSSCT00000026636	ENSSSCG00000024921	--	--	22448132	22449067	-	29304	upstream
chr7	ALDBSSCT0000010081	ALDBSSCG0000006137	--	Annotated_lncRNA	22478372	22480123	-	ENSSSCT00000025259	ENSSSCG00000023629	--	--	22438117	22439052	-	39319	upstream
chr7	ALDBSSCT0000010080	ALDBSSCG0000006137	--	Annotated_lncRNA	22478372	22480123	-	ENSSSCT00000001259	ENSSSCG00000001161	--	--	22525412	22526344	+	45288	upstream
chr7	ALDBSSCT0000010080	ALDBSSCG0000006137	--	Annotated_lncRNA	22478372	22480123	-	ENSSSCT00000023495	ENSSSCG00000021863	--	--	22473137	22474072	+	4299	downstream
chr7	ALDBSSCT0000010080	ALDBSSCG0000006137	--	Annotated_lncRNA	22478372	22480123	-	ENSSSCT00000001251	ENSSSCG00000027958	--	--	22544483	22547649	-	64359	downstream
chr7	ALDBSSCT0000010080	ALDBSSCG0000006137	--	Annotated_lncRNA	22478372	22480123	-	ENSSSCT00000001255	ENSSSCG00000001157	--	--	22459943	22461030	-	17341	upstream
chr7	ALDBSSCT0000010080	ALDBSSCG0000006137	--	Annotated_lncRNA	22478372	22480123	-	ENSSSCT00000001254	ENSSSCG00000001156	ZNF322	zinc finger protein 322 [Source:HGNC Symbol;Acc:HGNC:23640]	22517688	22520174	+	37564	upstream
chr7	ALDBSSCT0000010080	ALDBSSCG0000006137	--	Annotated_lncRNA	22478372	22480123	-	ENSSSCT00000026636	ENSSSCG00000024921	--	--	22448132	22449067	-	29304	upstream
chr7	ALDBSSCT0000010080	ALDBSSCG0000006137	--	Annotated_lncRNA	22478372	22480123	-	ENSSSCT00000025259	ENSSSCG00000023629	--	--	22438117	22439052	-	39319	upstream
chr6	ALDBSSCT0000009292	ALDBSSCG0000005667	--	Annotated_lncRNA	39985065	39993892	-	ENSSSCT00000030862	ENSSSCG00000002879	GRAMD1A	GRAM domain containing 1A [Source:HGNC Symbol;Acc:HGNC:29305]	39995624	40019940	+	1731	upstream
chr6	ALDBSSCT0000009292	ALDBSSCG0000005667	--	Annotated_lncRNA	39985065	39993892	-	ENSSSCT00000003182	ENSSSCG00000002880	ZNF792	zinc finger protein 792 [Source:HGNC Symbol;Acc:HGNC:24751]	39944882	39950787	-	34277	upstream
chr6	ALDBSSCT0000009292	ALDBSSCG0000005667	--	Annotated_lncRNA	39985065	39993892	-	ENSSSCT00000003181	ENSSSCG00000002879	GRAMD1A	GRAM domain containing 1A [Source:HGNC Symbol;Acc:HGNC:29305]	39999335	40019940	+	5442	upstream
chr6	ALDBSSCT0000009292	ALDBSSCG0000005667	--	Annotated_lncRNA	39985065	39993892	-	ENSSSCT00000026468	ENSSSCG00000023267	SCN1B	sodium channel, voltage gated, type I beta subunit [Source:HGNC Symbol;Acc:HGNC:10586]	40022675	40031626	+	28782	upstream
chr6	ALDBSSCT0000009292	ALDBSSCG0000005667	--	Annotated_lncRNA	39985065	39993892	-	ENSSSCT00000027321	ENSSSCG00000021374	FXYD1	FXYD domain containing ion transport regulator 1 [Source:HGNC Symbol;Acc:HGNC:4025]	40067346	40070582	+	73453	upstream
chr1	ALDBSSCT0000000073	ALDBSSCG0000000042	--	Annotated_lncRNA	23666364	23683362	+	ENSSSCT00000004562	ENSSSCG00000004127	PLAGL1	PLAG1 like zinc finger 1 [Source:HGNC Symbol;Acc:HGNC:9046]	23687363	23707500	+	4000	upstream
chr1	ALDBSSCT0000000073	ALDBSSCG0000000042	--	Annotated_lncRNA	23666364	23683362	+	ENSSSCT00000004563	ENSSSCG00000004128	ZC2HC1B	zinc finger, C2HC-type containing 1B [Source:HGNC Symbol;Acc:HGNC:21174]	23710688	23739608	-	27325	downstream
chr1	ALDBSSCT0000000073	ALDBSSCG0000000042	--	Annotated_lncRNA	23666364	23683362	+	ENSSSCT00000004567	ENSSSCG00000004132	--	--	23765233	23938784	-	81870	downstream
chr3	ALDBSSCT0000006738	ALDBSSCG0000004112	--	Annotated_lncRNA	58847852	58912933	+	ENSSSCT00000008971	ENSSSCG00000008192	TMEM131	transmembrane protein 131 [Source:HGNC Symbol;Acc:HGNC:30366]	58923017	59040071	+	10083	upstream
chr14	ENSSSCT00000021277	ENSSSCG00000019682	7SK	Annotated_lncRNA	115787973	115788244	-	ENSSSCT00000011474	ENSSSCG00000010486	HELLS	helicase, lymphoid-specific [Source:HGNC Symbol;Acc:HGNC:4861]	115768792	115812890	-	-272	sense_overlapping
chr14	ENSSSCT00000021277	ENSSSCG00000019682	7SK	Annotated_lncRNA	115787973	115788244	-	ENSSSCT00000011473	ENSSSCG00000010485	--	--	115760550	115763113	+	24859	downstream
chr14	ENSSSCT00000021277	ENSSSCG00000019682	7SK	Annotated_lncRNA	115787973	115788244	-	ENSSSCT00000023538	ENSSSCG00000023002	--	--	115819878	115819966	+	31633	upstream
chr14	ENSSSCT00000021277	ENSSSCG00000019682	7SK	Annotated_lncRNA	115787973	115788244	-	ENSSSCT00000030691	ENSSSCG00000022139	--	--	115679181	115716364	+	71608	downstream
chr14	ENSSSCT00000021277	ENSSSCG00000019682	7SK	Annotated_lncRNA	115787973	115788244	-	ENSSSCT00000023647	ENSSSCG00000029831	--	--	115744117	115746912	+	41060	downstream
chr14	ENSSSCT00000021277	ENSSSCG00000019682	7SK	Annotated_lncRNA	115787973	115788244	-	ENSSSCT00000013259	ENSSSCG00000012120	--	--	115830892	115831017	-	42647	downstream
chr9	ALDBSSCT0000011356	ALDBSSCG0000006897	--	Annotated_lncRNA	137663830	137725093	+	ENSSSCT00000030440	ENSSSCG00000030217	COLGALT2	collagen beta(1-O)galactosyltransferase 2 [Source:HGNC Symbol;Acc:HGNC:16790]	137480274	137611261	-	52568	upstream
chr9	ALDBSSCT0000011356	ALDBSSCG0000006897	--	Annotated_lncRNA	137663830	137725093	+	ENSSSCT00000016954	ENSSSCG00000015564	TSEN15	tRNA splicing endonuclease subunit 15 [Source:HGNC Symbol;Acc:HGNC:16791]	137621561	137657224	+	6605	downstream
chr17	ENSSSCT00000035867	ENSSSCG00000007146	SIGLEC1	Annotated_lncRNA	36328314	36349591	+	ENSSSCT00000030866	ENSSSCG00000021401	GFRA4	GDNF family receptor alpha 4 [Source:HGNC Symbol;Acc:HGNC:13821]	36368069	36370418	+	18477	upstream
chr17	ENSSSCT00000035867	ENSSSCG00000007146	SIGLEC1	Annotated_lncRNA	36328314	36349591	+	ENSSSCT00000035881	ENSSSCG00000007153	ATRN	attractin [Source:HGNC Symbol;Acc:HGNC:885]	36383456	36439127	-	33864	downstream
chr17	ENSSSCT00000035867	ENSSSCG00000007146	SIGLEC1	Annotated_lncRNA	36328314	36349591	+	ENSSSCT00000031284	ENSSSCG00000023811	AP5S1	adaptor related protein complex 5, sigma 1 subunit [Source:HGNC Symbol;Acc:HGNC:15875]	36226136	36236032	-	92281	upstream
chr17	ENSSSCT00000035867	ENSSSCG00000007146	SIGLEC1	Annotated_lncRNA	36328314	36349591	+	ENSSSCT00000007817	ENSSSCG00000007145	ADAM33	ADAM metallopeptidase domain 33 [Source:HGNC Symbol;Acc:HGNC:15478]	36350319	36365013	+	727	upstream
chr17	ENSSSCT00000035867	ENSSSCG00000007146	SIGLEC1	Annotated_lncRNA	36328314	36349591	+	ENSSSCT00000007820	ENSSSCG00000007147	--	--	36285534	36305348	-	22965	upstream
chr17	ENSSSCT00000035867	ENSSSCG00000007146	SIGLEC1	Annotated_lncRNA	36328314	36349591	+	ENSSSCT00000007821	ENSSSCG00000007148	C20orf27	chromosome 20 open reading frame 27 [Source:HGNC Symbol;Acc:HGNC:15873]	36283270	36283745	+	44568	downstream
chr17	ENSSSCT00000035867	ENSSSCG00000007146	SIGLEC1	Annotated_lncRNA	36328314	36349591	+	ENSSSCT00000007822	ENSSSCG00000007149	SPEF1	sperm flagellar 1 [Source:HGNC Symbol;Acc:HGNC:15874]	36267030	36270635	+	57678	downstream
chr17	ENSSSCT00000035867	ENSSSCG00000007146	SIGLEC1	Annotated_lncRNA	36328314	36349591	+	ENSSSCT00000007823	ENSSSCG00000007150	TIGD6	tigger transposable element derived 6 [Source:HGNC Symbol;Acc:HGNC:18332]	36263349	36263885	+	64428	downstream
chr17	ENSSSCT00000035867	ENSSSCG00000007146	SIGLEC1	Annotated_lncRNA	36328314	36349591	+	ENSSSCT00000007824	ENSSSCG00000007151	CDC25B	cell division cycle 25B [Source:HGNC Symbol;Acc:HGNC:1726]	36244258	36254564	-	73749	upstream
chr17	ENSSSCT00000035867	ENSSSCG00000007146	SIGLEC1	Annotated_lncRNA	36328314	36349591	+	ENSSSCT00000007826	ENSSSCG00000007153	ATRN	attractin [Source:HGNC Symbol;Acc:HGNC:885]	36381690	36619079	-	32098	downstream
chr17	ENSSSCT00000035867	ENSSSCG00000007146	SIGLEC1	Annotated_lncRNA	36328314	36349591	+	ENSSSCT00000035365	ENSSSCG00000007153	ATRN	attractin [Source:HGNC Symbol;Acc:HGNC:885]	36385842	36516356	-	36250	downstream
chr9	ALDBSSCT0000011355	ALDBSSCG0000006897	--	Annotated_lncRNA	137659239	137671465	+	ENSSSCT00000030440	ENSSSCG00000030217	COLGALT2	collagen beta(1-O)galactosyltransferase 2 [Source:HGNC Symbol;Acc:HGNC:16790]	137480274	137611261	-	47977	upstream
chr9	ALDBSSCT0000011355	ALDBSSCG0000006897	--	Annotated_lncRNA	137659239	137671465	+	ENSSSCT00000016954	ENSSSCG00000015564	TSEN15	tRNA splicing endonuclease subunit 15 [Source:HGNC Symbol;Acc:HGNC:16791]	137621561	137657224	+	2014	downstream
chr9	ALDBSSCT0000011353	ALDBSSCG0000006896	--	Annotated_lncRNA	137020289	137025834	+	ENSSSCT00000016947	ENSSSCG00000015557	NMNAT2	nicotinamide nucleotide adenylyltransferase 2 [Source:HGNC Symbol;Acc:HGNC:16789]	136813871	136958680	-	61608	upstream
chr9	ALDBSSCT0000011353	ALDBSSCG0000006896	--	Annotated_lncRNA	137020289	137025834	+	ENSSSCT00000016949	ENSSSCG00000015559	NCF2	neutrophil cytosolic factor 2 [Source:HGNC Symbol;Acc:HGNC:7661]	137106911	137137467	-	81076	downstream
chr9	ALDBSSCT0000011353	ALDBSSCG0000006896	--	Annotated_lncRNA	137020289	137025834	+	ENSSSCT00000026288	ENSSSCG00000015558	SMG7	SMG7 nonsense mediated mRNA decay factor [Source:HGNC Symbol;Acc:HGNC:16792]	137052344	137103421	+	26509	upstream
chr9	ALDBSSCT0000011353	ALDBSSCG0000006896	--	Annotated_lncRNA	137020289	137025834	+	ENSSSCT00000016948	ENSSSCG00000015558	SMG7	SMG7 nonsense mediated mRNA decay factor [Source:HGNC Symbol;Acc:HGNC:16792]	137064418	137103421	+	38583	upstream
chr7	ALDBSSCT0000009903	ALDBSSCG0000006026	--	Annotated_lncRNA	105420591	105421475	+	ENSSSCT00000002654	ENSSSCG00000002387	GPATCH2L	G-patch domain containing 2 like [Source:HGNC Symbol;Acc:HGNC:20210]	105370887	105416373	+	4217	downstream
chr7	ALDBSSCT0000009908	ALDBSSCG0000006029	--	Annotated_lncRNA	106107725	106112169	+	ENSSSCT00000002660	ENSSSCG00000002392	IRF2BPL	interferon regulatory factor 2 binding protein-like [Source:HGNC Symbol;Acc:HGNC:14282]	106151786	106154137	-	39616	downstream
chr7	ALDBSSCT0000009908	ALDBSSCG0000006029	--	Annotated_lncRNA	106107725	106112169	+	ENSSSCT00000002659	ENSSSCG00000002391	LRRC74A	leucine rich repeat containing 74A [Source:HGNC Symbol;Acc:HGNC:23346]	106005464	106033717	+	74007	downstream
chr5	ALDBSSCT0000008439	ALDBSSCG0000005125	--	Annotated_lncRNA	95094019	95434577	+	ENSSSCT00000000998	ENSSSCG00000000914	BTG1	B-cell translocation gene 1, anti-proliferative [Source:HGNC Symbol;Acc:HGNC:1130]	95088441	95091191	+	2827	downstream
chr15	ALDBSSCT0000004383	ALDBSSCG0000002663	--	Annotated_lncRNA	8167430	8187632	-	ENSSSCT00000025258	ENSSSCG00000023628	--	--	8286399	8286581	-	98766	downstream
chr8	ALDBSSCT0000010886	ALDBSSCG0000006595	--	Annotated_lncRNA	73273481	73320571	-	ENSSSCT00000028188	ENSSSCG00000024592	ANKRD17	ankyrin repeat domain-containing protein 17 [Source:RefSeq peptide;Acc:NP_001188312]	73361993	73453165	-	41421	downstream
chr8	ALDBSSCT0000010886	ALDBSSCG0000006595	--	Annotated_lncRNA	73273481	73320571	-	ENSSSCT00000009801	ENSSSCG00000008947	COX18	COX18 cytochrome c oxidase assembly factor [Source:HGNC Symbol;Acc:HGNC:26801]	73343578	73356286	-	23006	downstream
chr8	ALDBSSCT0000010889	ALDBSSCG0000006596	--	Annotated_lncRNA	73918297	73931134	-	ENSSSCT00000009804	ENSSSCG00000008950	AFM	afamin [Source:HGNC Symbol;Acc:HGNC:316]	73806956	73828345	+	89951	downstream
chr8	ALDBSSCT0000010889	ALDBSSCG0000006596	--	Annotated_lncRNA	73918297	73931134	-	ENSSSCT00000009805	ENSSSCG00000008951	--	--	73832255	73840433	+	77863	downstream
chr8	ALDBSSCT0000010889	ALDBSSCG0000006596	--	Annotated_lncRNA	73918297	73931134	-	ENSSSCT00000009806	ENSSSCG00000008952	RASSF6	Ras association (RalGDS/AF-6) domain family member 6 [Source:HGNC Symbol;Acc:HGNC:20796]	73876359	73898510	-	19786	upstream
chr8	ALDBSSCT0000010889	ALDBSSCG0000006596	--	Annotated_lncRNA	73918297	73931134	-	ENSSSCT00000026155	ENSSSCG00000023426	--	--	73845264	73872872	+	45424	downstream
chr6	ALDBSSCT0000009129	ALDBSSCG0000005567	--	Annotated_lncRNA	143658806	143661919	+	ENSSSCT00000004249	ENSSSCG00000003837	PRKAA2	protein kinase, AMP-activated, alpha 2 catalytic subunit [Source:HGNC Symbol;Acc:HGNC:9377]	143547628	143573947	+	84858	downstream
chr6	ALDBSSCT0000009129	ALDBSSCG0000005567	--	Annotated_lncRNA	143658806	143661919	+	ENSSSCT00000004251	ENSSSCG00000003839	PLPP3	phospholipid phosphatase 3 [Source:HGNC Symbol;Acc:HGNC:9229]	143689175	143732390	+	27255	upstream
chr6	ALDBSSCT0000009129	ALDBSSCG0000005567	--	Annotated_lncRNA	143658806	143661919	+	ENSSSCT00000028104	ENSSSCG00000026682	--	--	143581803	143591161	-	67644	upstream
chr6	LNC_000587	XLOC_052025	--	Novel_lncRNA	55979903	56001075	-	ENSSSCT00000003688	ENSSSCG00000003322	ZNF582	zinc finger protein 582 [Source:HGNC Symbol;Acc:HGNC:26421]	55967482	55979140	+	762	downstream
chr6	LNC_000587	XLOC_052025	--	Novel_lncRNA	55979903	56001075	-	ENSSSCT00000003690	ENSSSCG00000003324	ZNF471	zinc finger protein 471 [Source:HGNC Symbol;Acc:HGNC:23226]	56037354	56043330	+	36278	upstream
chr6	LNC_000587	XLOC_052025	--	Novel_lncRNA	55979903	56001075	-	ENSSSCT00000028805	ENSSSCG00000024113	ZNF583	zinc finger protein 583 [Source:HGNC Symbol;Acc:HGNC:26427]	55926966	55948965	-	30937	upstream
chr6	LNC_000587	XLOC_052025	--	Novel_lncRNA	55979903	56001075	-	ENSSSCT00000030766	ENSSSCG00000026045	--	--	56001381	56012811	+	305	upstream
chr6	LNC_000586	XLOC_052023	--	Novel_lncRNA	55957949	55963244	-	ENSSSCT00000003688	ENSSSCG00000003322	ZNF582	zinc finger protein 582 [Source:HGNC Symbol;Acc:HGNC:26421]	55967482	55979140	+	4237	upstream
chr6	LNC_000586	XLOC_052023	--	Novel_lncRNA	55957949	55963244	-	ENSSSCT00000003690	ENSSSCG00000003324	ZNF471	zinc finger protein 471 [Source:HGNC Symbol;Acc:HGNC:23226]	56037354	56043330	+	74109	upstream
chr6	LNC_000586	XLOC_052023	--	Novel_lncRNA	55957949	55963244	-	ENSSSCT00000028805	ENSSSCG00000024113	ZNF583	zinc finger protein 583 [Source:HGNC Symbol;Acc:HGNC:26427]	55926966	55948965	-	8983	upstream
chr6	LNC_000586	XLOC_052023	--	Novel_lncRNA	55957949	55963244	-	ENSSSCT00000030766	ENSSSCG00000026045	--	--	56001381	56012811	+	38136	upstream
chr6	LNC_000585	XLOC_051837	--	Novel_lncRNA	48257519	48260877	-	ENSSSCT00000003448	ENSSSCG00000003109	TMEM160	transmembrane protein 160 [Source:HGNC Symbol;Acc:HGNC:26042]	48248387	48251217	-	6301	upstream
chr6	LNC_000585	XLOC_051837	--	Novel_lncRNA	48257519	48260877	-	ENSSSCT00000003449	ENSSSCG00000003110	--	--	48277469	48294992	-	16591	downstream
chr6	LNC_000585	XLOC_051837	--	Novel_lncRNA	48257519	48260877	-	ENSSSCT00000003450	ENSSSCG00000003111	SAE1	SUMO1 activating enzyme subunit 1 [Source:HGNC Symbol;Acc:HGNC:30660]	48331035	48401072	+	70157	upstream
chr6	LNC_000585	XLOC_051837	--	Novel_lncRNA	48257519	48260877	-	ENSSSCT00000003446	ENSSSCG00000003107	ARHGAP35	Rho GTPase activating protein 35 [Source:HGNC Symbol;Acc:HGNC:4591]	48128316	48215354	+	42164	downstream
chr6	LNC_000585	XLOC_051837	--	Novel_lncRNA	48257519	48260877	-	ENSSSCT00000003447	ENSSSCG00000003108	NPAS1	neuronal PAS domain protein 1 [Source:HGNC Symbol;Acc:HGNC:7894]	48231317	48248198	+	9320	downstream
chr6	LNC_000585	XLOC_051837	--	Novel_lncRNA	48257519	48260877	-	ENSSSCT00000024307	ENSSSCG00000022958	ZC3H4	zinc finger CCCH-type containing 4 [Source:HGNC Symbol;Acc:HGNC:17808]	48268523	48277431	-	7645	downstream
chr6	LNC_000584	XLOC_051645	--	Novel_lncRNA	40390790	40394150	-	ENSSSCT00000034141	ENSSSCG00000002893	CD22	CD22 molecule [Source:HGNC Symbol;Acc:HGNC:1643]	40344666	40346320	-	44469	upstream
chr6	LNC_000584	XLOC_051645	--	Novel_lncRNA	40390790	40394150	-	ENSSSCT00000003198	ENSSSCG00000002893	CD22	CD22 molecule [Source:HGNC Symbol;Acc:HGNC:1643]	40346632	40351144	-	39645	upstream
chr6	LNC_000584	XLOC_051645	--	Novel_lncRNA	40390790	40394150	-	ENSSSCT00000003207	ENSSSCG00000002902	--	--	40444520	40454205	-	50369	downstream
chr6	LNC_000584	XLOC_051645	--	Novel_lncRNA	40390790	40394150	-	ENSSSCT00000028034	ENSSSCG00000021139	--	--	40385885	40391977	+	-1188	antisense
chr6	LNC_000584	XLOC_051645	--	Novel_lncRNA	40390790	40394150	-	ENSSSCT00000003195	ENSSSCG00000002891	--	--	40333922	40334902	-	55887	upstream
chr6	LNC_000584	XLOC_051645	--	Novel_lncRNA	40390790	40394150	-	ENSSSCT00000003196	ENSSSCG00000002892	FFAR1	free fatty acid receptor 1 [Source:HGNC Symbol;Acc:HGNC:4498]	40339566	40340468	-	50321	upstream
chr6	LNC_000584	XLOC_051645	--	Novel_lncRNA	40390790	40394150	-	ENSSSCT00000003197	ENSSSCG00000002893	CD22	CD22 molecule [Source:HGNC Symbol;Acc:HGNC:1643]	40343148	40385820	-	4969	upstream
chr6	LNC_000584	XLOC_051645	--	Novel_lncRNA	40390790	40394150	-	ENSSSCT00000003191	ENSSSCG00000002888	GAPDHS	glyceraldehyde-3-phosphate dehydrogenase, spermatogenic [Source:HGNC Symbol;Acc:HGNC:24864]	40367718	40376997	-	13792	upstream
chr6	LNC_000584	XLOC_051645	--	Novel_lncRNA	40390790	40394150	-	ENSSSCT00000003192	ENSSSCG00000002889	SBSN	suprabasin [Source:HGNC Symbol;Acc:HGNC:24950]	40381518	40382606	+	8183	downstream
chr6	LNC_000584	XLOC_051645	--	Novel_lncRNA	40390790	40394150	-	ENSSSCT00000003208	ENSSSCG00000002903	--	--	40462011	40462713	-	67860	downstream
chr6	LNC_000584	XLOC_051645	--	Novel_lncRNA	40390790	40394150	-	ENSSSCT00000030352	ENSSSCG00000024282	-	free fatty acid receptor 2-like [Source:RefSeq peptide;Acc:NP_001265694]	40305180	40306031	-	84758	upstream
chr6	LNC_000584	XLOC_051645	--	Novel_lncRNA	40390790	40394150	-	ENSSSCT00000033455	ENSSSCG00000002893	CD22	CD22 molecule [Source:HGNC Symbol;Acc:HGNC:1643]	40383412	40385785	-	5004	upstream
chr6	LNC_000582	XLOC_051500	--	Novel_lncRNA	23821927	23838331	-	ENSSSCT00000033754	ENSSSCG00000002795	CDH11	cadherin 11, type 2, OB-cadherin (osteoblast) [Source:HGNC Symbol;Acc:HGNC:1750]	23710762	23799583	-	22343	upstream
chr6	LNC_000582	XLOC_051500	--	Novel_lncRNA	23821927	23838331	-	ENSSSCT00000035974	ENSSSCG00000002795	CDH11	cadherin 11, type 2, OB-cadherin (osteoblast) [Source:HGNC Symbol;Acc:HGNC:1750]	23711535	23798846	-	23080	upstream
chr6	LNC_000582	XLOC_051500	--	Novel_lncRNA	23821927	23838331	-	ENSSSCT00000003095	ENSSSCG00000002795	CDH11	cadherin 11, type 2, OB-cadherin (osteoblast) [Source:HGNC Symbol;Acc:HGNC:1750]	23708329	23798843	-	23083	upstream
chr6	LNC_000582	XLOC_051500	--	Novel_lncRNA	23821927	23838331	-	ENSSSCT00000033473	ENSSSCG00000002795	CDH11	cadherin 11, type 2, OB-cadherin (osteoblast) [Source:HGNC Symbol;Acc:HGNC:1750]	23710762	23815130	-	6796	upstream
chr6	LNC_000582	XLOC_051500	--	Novel_lncRNA	23821927	23838331	-	ENSSSCT00000032863	ENSSSCG00000002795	CDH11	cadherin 11, type 2, OB-cadherin (osteoblast) [Source:HGNC Symbol;Acc:HGNC:1750]	23761970	23803950	-	17976	upstream
chr6	LNC_000581	XLOC_051436	--	Novel_lncRNA	13986551	13993616	-	ENSSSCT00000026778	ENSSSCG00000021770	--	--	13997593	14014047	-	3976	downstream
chr6	LNC_000581	XLOC_051436	--	Novel_lncRNA	13986551	13993616	-	ENSSSCT00000003025	ENSSSCG00000002730	CALB2	calbindin 2 [Source:HGNC Symbol;Acc:HGNC:1435]	13904151	13933267	+	53283	downstream
chr6	LNC_000581	XLOC_051436	--	Novel_lncRNA	13986551	13993616	-	ENSSSCT00000003026	ENSSSCG00000002731	--	--	13961387	13962505	-	24045	upstream
chr6	LNC_000581	XLOC_051436	--	Novel_lncRNA	13986551	13993616	-	ENSSSCT00000003033	ENSSSCG00000002737	CHST4	carbohydrate (N-acetylglucosamine 6-O) sulfotransferase 4 [Source:HGNC Symbol;Acc:HGNC:1972]	14027556	14029094	+	33939	upstream
chr6	LNC_000581	XLOC_051436	--	Novel_lncRNA	13986551	13993616	-	ENSSSCT00000003032	ENSSSCG00000002736	TAT	tyrosine aminotransferase [Source:HGNC Symbol;Acc:HGNC:11573]	14064568	14076437	-	70951	downstream
chr6	LNC_000581	XLOC_051436	--	Novel_lncRNA	13986551	13993616	-	ENSSSCT00000003034	ENSSSCG00000002738	--	--	13975957	13977825	-	8725	upstream
chr6	LNC_000589	XLOC_052104	--	Novel_lncRNA	58193853	58194685	-	ENSSSCT00000003715	ENSSSCG00000003346	ANKRD65	ankyrin repeat domain 65 [Source:HGNC Symbol;Acc:HGNC:42950]	58284837	58286602	-	90151	downstream
chr6	LNC_000589	XLOC_052104	--	Novel_lncRNA	58193853	58194685	-	ENSSSCT00000003709	ENSSSCG00000003340	CPTP	ceramide-1-phosphate transfer protein [Source:HGNC Symbol;Acc:HGNC:28116]	58108616	58109437	+	84415	downstream
chr6	LNC_000589	XLOC_052104	--	Novel_lncRNA	58193853	58194685	-	ENSSSCT00000003708	ENSSSCG00000003339	CPSF3L	cleavage and polyadenylation specific factor 3-like [Source:HGNC Symbol;Acc:HGNC:26052]	58092873	58105986	-	87866	upstream
chr6	LNC_000589	XLOC_052104	--	Novel_lncRNA	58193853	58194685	-	ENSSSCT00000029719	ENSSSCG00000021880	MXRA8	matrix-remodelling associated 8 [Source:HGNC Symbol;Acc:HGNC:7542]	58129042	58134259	-	59593	upstream
chr6	LNC_000589	XLOC_052104	--	Novel_lncRNA	58193853	58194685	-	ENSSSCT00000003716	ENSSSCG00000003347	MRPL20	mitochondrial ribosomal protein L20 [Source:HGNC Symbol;Acc:HGNC:14478]	58274549	58279707	-	79863	downstream
chr6	LNC_000589	XLOC_052104	--	Novel_lncRNA	58193853	58194685	-	ENSSSCT00000003717	ENSSSCG00000003348	SSU72	SSU72 homolog, RNA polymerase II CTD phosphatase [Source:HGNC Symbol;Acc:HGNC:25016]	58158456	58185123	-	8729	upstream
chr6	LNC_000589	XLOC_052104	--	Novel_lncRNA	58193853	58194685	-	ENSSSCT00000003707	ENSSSCG00000003338	PUSL1	pseudouridylate synthase-like 1 [Source:HGNC Symbol;Acc:HGNC:26914]	58092108	58094373	+	99479	downstream
chr6	LNC_000589	XLOC_052104	--	Novel_lncRNA	58193853	58194685	-	ENSSSCT00000003719	ENSSSCG00000003350	MIB2	mindbomb E3 ubiquitin protein ligase 2 [Source:HGNC Symbol;Acc:HGNC:30577]	58219213	58230000	+	24527	upstream
chr6	LNC_000589	XLOC_052104	--	Novel_lncRNA	58193853	58194685	-	ENSSSCT00000003710	ENSSSCG00000003341	TAS1R3	taste 1 receptor member 3 [Source:HGNC Symbol;Acc:HGNC:15661]	58111612	58115907	+	77945	downstream
chr6	LNC_000589	XLOC_052104	--	Novel_lncRNA	58193853	58194685	-	ENSSSCT00000003711	ENSSSCG00000003342	DVL1	dishevelled segment polarity protein 1 [Source:HGNC Symbol;Acc:HGNC:3084]	58116729	58126973	-	66879	upstream
chr6	LNC_000589	XLOC_052104	--	Novel_lncRNA	58193853	58194685	-	ENSSSCT00000024371	ENSSSCG00000003350	MIB2	mindbomb E3 ubiquitin protein ligase 2 [Source:HGNC Symbol;Acc:HGNC:30577]	58219213	58230000	+	24527	upstream
chr6	LNC_000589	XLOC_052104	--	Novel_lncRNA	58193853	58194685	-	ENSSSCT00000003723	ENSSSCG00000003354	CCNL2	cyclin L2 [Source:HGNC Symbol;Acc:HGNC:20570]	58269480	58271822	-	74794	downstream
chr6	LNC_000589	XLOC_052104	--	Novel_lncRNA	58193853	58194685	-	ENSSSCT00000003722	ENSSSCG00000003353	SLC35E2B	solute carrier family 35 member E2B [Source:HGNC Symbol;Acc:HGNC:33941]	58254067	58261282	-	59381	downstream
chr6	LNC_000589	XLOC_052104	--	Novel_lncRNA	58193853	58194685	-	ENSSSCT00000003721	ENSSSCG00000003352	--	--	58234026	58247707	-	39340	downstream
chr6	LNC_000589	XLOC_052104	--	Novel_lncRNA	58193853	58194685	-	ENSSSCT00000003720	ENSSSCG00000003351	MMP23B	matrix metallopeptidase 23B [Source:HGNC Symbol;Acc:HGNC:7171]	58231351	58233984	+	36665	upstream
chr6	LNC_000589	XLOC_052104	--	Novel_lncRNA	58193853	58194685	-	ENSSSCT00000003714	ENSSSCG00000003345	TMEM88B	transmembrane protein 88B [Source:HGNC Symbol;Acc:HGNC:37099]	58290697	58293135	+	96011	upstream
chr6	LNC_000588	XLOC_052094	--	Novel_lncRNA	57926932	57928894	-	ENSSSCT00000030737	ENSSSCG00000026816	--	--	57838957	57843785	-	83146	upstream
chr6	LNC_000588	XLOC_052094	--	Novel_lncRNA	57926932	57928894	-	ENSSSCT00000003698	ENSSSCG00000003331	TNFRSF4	tumor necrosis factor receptor superfamily member 4 [Source:HGNC Symbol;Acc:HGNC:11918]	58011601	58014416	+	82706	upstream
chr6	LNC_000588	XLOC_052094	--	Novel_lncRNA	57926932	57928894	-	ENSSSCT00000003697	ENSSSCG00000003330	TNFRSF18	tumor necrosis factor receptor superfamily member 18 [Source:HGNC Symbol;Acc:HGNC:11914]	58019251	58021622	+	90356	upstream
chr6	LNC_000588	XLOC_052094	--	Novel_lncRNA	57926932	57928894	-	ENSSSCT00000003699	ENSSSCG00000003332	SDF4	stromal cell derived factor 4 [Source:HGNC Symbol;Acc:HGNC:24188]	57998325	58008413	+	69430	upstream
chr6	LNC_000588	XLOC_052094	--	Novel_lncRNA	57926932	57928894	-	ENSSSCT00000024059	ENSSSCG00000024430	HES4	hes family bHLH transcription factor 4 [Source:HGNC Symbol;Acc:HGNC:24149]	57945476	57946990	+	16581	upstream
chr6	LNC_000588	XLOC_052094	--	Novel_lncRNA	57926932	57928894	-	ENSSSCT00000003701	ENSSSCG00000003334	UBE2J2	ubiquitin conjugating enzyme E2, J2 [Source:HGNC Symbol;Acc:HGNC:19268]	57969755	57982129	+	40860	upstream
chr6	LNC_000588	XLOC_052094	--	Novel_lncRNA	57926932	57928894	-	ENSSSCT00000024617	ENSSSCG00000023973	--	--	57886829	57898138	-	28793	upstream
chr6	LNC_000588	XLOC_052094	--	Novel_lncRNA	57926932	57928894	-	ENSSSCT00000003700	ENSSSCG00000003333	FAM132A	family with sequence similarity 132 member A [Source:HGNC Symbol;Acc:HGNC:32308]	57985130	57989331	+	56235	upstream
chr6	LNC_000588	XLOC_052094	--	Novel_lncRNA	57926932	57928894	-	ENSSSCT00000027686	ENSSSCG00000024797	C1orf159	chromosome 1 open reading frame 159 [Source:HGNC Symbol;Acc:HGNC:26062]	57819109	57828758	+	98173	downstream
chr6	LNC_000588	XLOC_052094	--	Novel_lncRNA	57926932	57928894	-	ENSSSCT00000026215	ENSSSCG00000022204	--	--	57851225	57880810	-	46121	upstream
chr6	LNC_000588	XLOC_052094	--	Novel_lncRNA	57926932	57928894	-	ENSSSCT00000031335	ENSSSCG00000030505	--	--	57934193	57942570	+	5298	upstream
chr6	LNC_000588	XLOC_052094	--	Novel_lncRNA	57926932	57928894	-	ENSSSCT00000023773	ENSSSCG00000022151	B3GALT6	Beta-1,3-galactosyltransferase 6 [Source:HGNC Symbol;Acc:HGNC:17978]	57997153	57998124	-	68258	downstream
chr6	LNC_000588	XLOC_052094	--	Novel_lncRNA	57926932	57928894	-	ENSSSCT00000035295	ENSSSCG00000030870	TNFRSF18	-	58019344	58019506	-	90449	downstream
chr6	LNC_000588	XLOC_052094	--	Novel_lncRNA	57926932	57928894	-	ENSSSCT00000022837	ENSSSCG00000029979	--	--	57899351	57901884	+	25047	downstream
chr3	ALDBSSCT0000006605	ALDBSSCG0000004037	--	Annotated_lncRNA	25776844	25779795	+	ENSSSCT00000008601	ENSSSCG00000007851	ZP2	zona pellucida glycoprotein 2 (sperm receptor) [Source:HGNC Symbol;Acc:HGNC:13188]	25665441	25679349	+	97494	downstream
chr3	ALDBSSCT0000006605	ALDBSSCG0000004037	--	Annotated_lncRNA	25776844	25779795	+	ENSSSCT00000024054	ENSSSCG00000021955	--	--	25784628	25787435	+	4832	upstream
chr5	ALDBSSCT0000008231	ALDBSSCG0000004997	--	Annotated_lncRNA	1531036	1534106	+	ENSSSCT00000000020	ENSSSCG00000000019	--	--	1512925	1526924	-	4111	upstream
chr5	ALDBSSCT0000008231	ALDBSSCG0000004997	--	Annotated_lncRNA	1531036	1534106	+	ENSSSCT00000000018	ENSSSCG00000000017	--	--	1408379	1449331	+	81704	downstream
chr5	ALDBSSCT0000008231	ALDBSSCG0000004997	--	Annotated_lncRNA	1531036	1534106	+	ENSSSCT00000000019	ENSSSCG00000000018	--	--	1491429	1503189	+	27846	downstream
chr3	ALDBSSCT0000006542	ALDBSSCG0000003999	--	Annotated_lncRNA	6414912	6419954	+	ENSSSCT00000008347	ENSSSCG00000007607	KPNA7	karyopherin alpha 7 (importin alpha 8) [Source:HGNC Symbol;Acc:HGNC:21839]	6330975	6364373	-	50538	upstream
chr3	ALDBSSCT0000006542	ALDBSSCG0000003999	--	Annotated_lncRNA	6414912	6419954	+	ENSSSCT00000008349	ENSSSCG00000007609	ARPC1A	actin related protein 2/3 complex subunit 1A [Source:HGNC Symbol;Acc:HGNC:703]	6434372	6463171	-	14417	downstream
chr3	ALDBSSCT0000006542	ALDBSSCG0000003999	--	Annotated_lncRNA	6414912	6419954	+	ENSSSCT00000031676	ENSSSCG00000026896	CPSF4	cleavage and polyadenylation specific factor 4 [Source:HGNC Symbol;Acc:HGNC:2327]	6494944	6506628	-	74989	downstream
chr3	ALDBSSCT0000006542	ALDBSSCG0000003999	--	Annotated_lncRNA	6414912	6419954	+	ENSSSCT00000008361	ENSSSCG00000029171	-	ATP synthase subunit f, mitochondrial [Source:RefSeq peptide;Acc:NP_001090933]	6493037	6494591	+	73082	upstream
chr13	ALDBSSCT0000003250	ALDBSSCG0000001959	--	Annotated_lncRNA	120032423	120034875	-	ENSSSCT00000012866	ENSSSCG00000011755	NCEH1	neutral cholesterol ester hydrolase 1 [Source:HGNC Symbol;Acc:HGNC:29260]	120035744	120052855	-	868	downstream
chr3	ALDBSSCT0000006544	ALDBSSCG0000004000	--	Annotated_lncRNA	6572301	6573154	+	ENSSSCT00000030708	ENSSSCG00000022023	ZKSCAN5	zinc finger with KRAB and SCAN domains 5 [Source:HGNC Symbol;Acc:HGNC:12867]	6588959	6611396	-	15804	downstream
chr3	ALDBSSCT0000006544	ALDBSSCG0000004000	--	Annotated_lncRNA	6572301	6573154	+	ENSSSCT00000031676	ENSSSCG00000026896	CPSF4	cleavage and polyadenylation specific factor 4 [Source:HGNC Symbol;Acc:HGNC:2327]	6494944	6506628	-	65672	upstream
chr3	ALDBSSCT0000006544	ALDBSSCG0000004000	--	Annotated_lncRNA	6572301	6573154	+	ENSSSCT00000008361	ENSSSCG00000029171	-	ATP synthase subunit f, mitochondrial [Source:RefSeq peptide;Acc:NP_001090933]	6493037	6494591	+	77709	downstream
chr3	ALDBSSCT0000006544	ALDBSSCG0000004000	--	Annotated_lncRNA	6572301	6573154	+	ENSSSCT00000008358	ENSSSCG00000007618	ZNF789	zinc finger protein 789 [Source:HGNC Symbol;Acc:HGNC:27801]	6577306	6623651	+	4151	upstream
chr3	ALDBSSCT0000006544	ALDBSSCG0000004000	--	Annotated_lncRNA	6572301	6573154	+	ENSSSCT00000008365	ENSSSCG00000007625	ARPC1B	actin related protein 2/3 complex subunit 1B [Source:HGNC Symbol;Acc:HGNC:704]	6524630	6527834	-	44466	upstream
chr3	ALDBSSCT0000006544	ALDBSSCG0000004000	--	Annotated_lncRNA	6572301	6573154	+	ENSSSCT00000008354	ENSSSCG00000027156	-	ATP synthase subunit f, mitochondrial [Source:RefSeq peptide;Acc:NP_001090933]	6662427	6663981	+	89272	upstream
chr3	ALDBSSCT0000006544	ALDBSSCG0000004000	--	Annotated_lncRNA	6572301	6573154	+	ENSSSCT00000008357	ENSSSCG00000007617	ZNF655	zinc finger protein 655 [Source:HGNC Symbol;Acc:HGNC:30899]	6534854	6548970	-	23330	upstream
chr3	ALDBSSCT0000006544	ALDBSSCG0000004000	--	Annotated_lncRNA	6572301	6573154	+	ENSSSCT00000008355	ENSSSCG00000007615	--	--	6665517	6679279	-	92362	downstream
chr3	ALDBSSCT0000006544	ALDBSSCG0000004000	--	Annotated_lncRNA	6572301	6573154	+	ENSSSCT00000030995	ENSSSCG00000029175	FAM200A	family with sequence similarity 200 member A [Source:HGNC Symbol;Acc:HGNC:25401]	6558454	6560175	+	12125	downstream
chr12	ALDBSSCT0000002385	ALDBSSCG0000001444	--	Annotated_lncRNA	15877723	15883046	-	ENSSSCT00000023789	ENSSSCG00000017299	2017-03-10	membrane associated ring-CH-type finger 10 [Source:HGNC Symbol;Acc:HGNC:26655]	15910048	15944341	+	27001	upstream
chr12	ALDBSSCT0000002385	ALDBSSCG0000001444	--	Annotated_lncRNA	15877723	15883046	-	ENSSSCT00000018836	ENSSSCG00000017300	MRC2	mannose receptor, C type 2 [Source:HGNC Symbol;Acc:HGNC:16875]	15951695	15978403	-	68648	downstream
chr12	ALDBSSCT0000002385	ALDBSSCG0000001444	--	Annotated_lncRNA	15877723	15883046	-	ENSSSCT00000018835	ENSSSCG00000017299	2017-03-10	membrane associated ring-CH-type finger 10 [Source:HGNC Symbol;Acc:HGNC:26655]	15897681	15944250	+	14634	upstream
chr3	ALDBSSCT0000006548	ALDBSSCG0000004002	--	Annotated_lncRNA	8501117	8511984	+	ENSSSCT00000008419	ENSSSCG00000007678	COL26A1	collagen, type XXVI, alpha 1 [Source:HGNC Symbol;Acc:HGNC:18038]	8611164	8701539	+	99179	upstream
chr3	ALDBSSCT0000006548	ALDBSSCG0000004002	--	Annotated_lncRNA	8501117	8511984	+	ENSSSCT00000008420	ENSSSCG00000007679	IFT22	intraflagellar transport 22 [Source:HGNC Symbol;Acc:HGNC:21895]	8491985	8496112	+	5004	downstream
chrX	ENSSSCT00000034731	ENSSSCG00000030806	CH242-445E7.1	Annotated_lncRNA	114048060	114051191	+	ENSSSCT00000035094	ENSSSCG00000012631	LONRF3	LON peptidase N-terminal domain and ring finger 3 [Source:HGNC Symbol;Acc:HGNC:21152]	114106192	114141837	-	55000	downstream
chrX	ENSSSCT00000034731	ENSSSCG00000030806	CH242-445E7.1	Annotated_lncRNA	114048060	114051191	+	ENSSSCT00000036557	ENSSSCG00000012631	LONRF3	LON peptidase N-terminal domain and ring finger 3 [Source:HGNC Symbol;Acc:HGNC:21152]	114106566	114140155	-	55374	downstream
chrX	ENSSSCT00000034731	ENSSSCG00000030806	CH242-445E7.1	Annotated_lncRNA	114048060	114051191	+	ENSSSCT00000013810	ENSSSCG00000012629	--	--	114059874	114061384	-	8682	downstream
chrX	ENSSSCT00000034731	ENSSSCG00000030806	CH242-445E7.1	Annotated_lncRNA	114048060	114051191	+	ENSSSCT00000013812	ENSSSCG00000012631	LONRF3	LON peptidase N-terminal domain and ring finger 3 [Source:HGNC Symbol;Acc:HGNC:21152]	114093006	114141838	-	41814	downstream
chrX	ENSSSCT00000034731	ENSSSCG00000030806	CH242-445E7.1	Annotated_lncRNA	114048060	114051191	+	ENSSSCT00000036507	ENSSSCG00000012627	AKAP17A	-	113939235	113972110	-	75949	upstream
chrX	ENSSSCT00000034731	ENSSSCG00000030806	CH242-445E7.1	Annotated_lncRNA	114048060	114051191	+	ENSSSCT00000033278	ENSSSCG00000012631	LONRF3	LON peptidase N-terminal domain and ring finger 3 [Source:HGNC Symbol;Acc:HGNC:21152]	114105006	114141836	-	53814	downstream
chrX	ENSSSCT00000034731	ENSSSCG00000030806	CH242-445E7.1	Annotated_lncRNA	114048060	114051191	+	ENSSSCT00000032882	ENSSSCG00000012631	LONRF3	LON peptidase N-terminal domain and ring finger 3 [Source:HGNC Symbol;Acc:HGNC:21152]	114106970	114118324	-	55778	downstream
chr12	ALDBSSCT0000002257	ALDBSSCG0000001359	--	Annotated_lncRNA	44151633	44153461	+	ENSSSCT00000019295	ENSSSCG00000017728	MYO1D	myosin ID [Source:HGNC Symbol;Acc:HGNC:7598]	43936628	44131499	+	20133	downstream
chr12	ALDBSSCT0000002257	ALDBSSCG0000001359	--	Annotated_lncRNA	44151633	44153461	+	ENSSSCT00000019297	ENSSSCG00000017730	CDK5R1	cyclin-dependent kinase 5, regulatory subunit 1 (p35) [Source:HGNC Symbol;Acc:HGNC:1775]	44252752	44253675	-	99290	downstream
chr16	ALDBSSCT0000004760	ALDBSSCG0000002897	--	Annotated_lncRNA	38491013	38492742	+	ENSSSCT00000018429	ENSSSCG00000016922	GPBP1	GC-rich promoter binding protein 1 [Source:HGNC Symbol;Acc:HGNC:29520]	38531076	38569322	+	38333	upstream
chr3	ALDBSSCT0000007018	ALDBSSCG0000004267	--	Annotated_lncRNA	10914326	10921517	-	ENSSSCT00000025955	ENSSSCG00000030378	LIMK1	LIM domain kinase 1 [Source:HGNC Symbol;Acc:HGNC:6613]	10936405	10962039	+	14887	upstream
chr3	ALDBSSCT0000007018	ALDBSSCG0000004267	--	Annotated_lncRNA	10914326	10921517	-	ENSSSCT00000024462	ENSSSCG00000025966	EIF4H	eukaryotic translation initiation factor 4H [Source:HGNC Symbol;Acc:HGNC:12741]	11003785	11031697	+	82267	upstream
chr3	ALDBSSCT0000007018	ALDBSSCG0000004267	--	Annotated_lncRNA	10914326	10921517	-	ENSSSCT00000032354	ENSSSCG00000025858	--	--	10929442	10935871	-	7924	downstream
chr3	ALDBSSCT0000007018	ALDBSSCG0000004267	--	Annotated_lncRNA	10914326	10921517	-	ENSSSCT00000029656	ENSSSCG00000025966	EIF4H	eukaryotic translation initiation factor 4H [Source:HGNC Symbol;Acc:HGNC:12741]	11003785	11031697	+	82267	upstream
chr3	ALDBSSCT0000007019	ALDBSSCG0000004268	--	Annotated_lncRNA	11422001	11425024	-	ENSSSCT00000030268	ENSSSCG00000007721	GTF2I	general transcription factor IIi [Source:HGNC Symbol;Acc:HGNC:4659]	11444069	11530028	+	19044	upstream
chr3	ALDBSSCT0000007019	ALDBSSCG0000004268	--	Annotated_lncRNA	11422001	11425024	-	ENSSSCT00000008464	ENSSSCG00000007720	GTF2IRD1	GTF2I repeat domain containing 1 [Source:HGNC Symbol;Acc:HGNC:4661]	11276910	11374748	+	47252	downstream
chr3	ALDBSSCT0000007019	ALDBSSCG0000004268	--	Annotated_lncRNA	11422001	11425024	-	ENSSSCT00000031896	ENSSSCG00000007721	GTF2I	general transcription factor IIi [Source:HGNC Symbol;Acc:HGNC:4659]	11444069	11530028	+	19044	upstream
chr3	ALDBSSCT0000007019	ALDBSSCG0000004268	--	Annotated_lncRNA	11422001	11425024	-	ENSSSCT00000008466	ENSSSCG00000007721	GTF2I	general transcription factor IIi [Source:HGNC Symbol;Acc:HGNC:4659]	11444069	11530028	+	19044	upstream
chr3	ALDBSSCT0000007016	ALDBSSCG0000004265	--	Annotated_lncRNA	10575565	10578193	-	ENSSSCT00000030732	ENSSSCG00000027342	BAZ1B	bromodomain adjacent to zinc finger domain 1B [Source:HGNC Symbol;Acc:HGNC:961]	10460754	10543512	-	32052	upstream
chr3	ALDBSSCT0000007016	ALDBSSCG0000004265	--	Annotated_lncRNA	10575565	10578193	-	ENSSSCT00000008455	ENSSSCG00000007712	DNAJC30	DnaJ heat shock protein family (Hsp40) member C30 [Source:HGNC Symbol;Acc:HGNC:16410]	10655350	10656030	-	77156	downstream
chr3	ALDBSSCT0000007016	ALDBSSCG0000004265	--	Annotated_lncRNA	10575565	10578193	-	ENSSSCT00000008456	ENSSSCG00000007713	WBSCR22	Williams Beuren syndrome chromosome region 22 [Source:HGNC Symbol;Acc:HGNC:16405]	10656159	10669332	+	77965	upstream
chr3	ALDBSSCT0000007016	ALDBSSCG0000004265	--	Annotated_lncRNA	10575565	10578193	-	ENSSSCT00000008457	ENSSSCG00000007714	STX1A	syntaxin 1A [Source:HGNC Symbol;Acc:HGNC:11433]	10670275	10679940	-	92081	downstream
chr3	ALDBSSCT0000007016	ALDBSSCG0000004265	--	Annotated_lncRNA	10575565	10578193	-	ENSSSCT00000008450	ENSSSCG00000007707	VPS37D	vacuolar protein sorting 37 homolog D (S. cerevisiae) [Source:HGNC Symbol;Acc:HGNC:18287]	10645945	10649074	+	67751	upstream
chr3	ALDBSSCT0000007016	ALDBSSCG0000004265	--	Annotated_lncRNA	10575565	10578193	-	ENSSSCT00000008451	ENSSSCG00000007708	BCL7B	B-cell CLL/lymphoma 7B [Source:HGNC Symbol;Acc:HGNC:1005]	10550014	10568958	-	6606	upstream
chr3	ALDBSSCT0000007016	ALDBSSCG0000004265	--	Annotated_lncRNA	10575565	10578193	-	ENSSSCT00000008452	ENSSSCG00000007709	TBL2	transducin (beta)-like 2 [Source:HGNC Symbol;Acc:HGNC:11586]	10587095	10592168	-	8901	downstream
chr3	ALDBSSCT0000007016	ALDBSSCG0000004265	--	Annotated_lncRNA	10575565	10578193	-	ENSSSCT00000008453	ENSSSCG00000007710	MLXIPL	MLX interacting protein-like [Source:HGNC Symbol;Acc:HGNC:12744]	10598335	10616606	-	20141	downstream
chrX	ALDBSSCT0000012012	ALDBSSCG0000007318	--	Annotated_lncRNA	15451392	15481567	-	ENSSSCT00000034125	ENSSSCG00000012153	RAI2	retinoic acid induced 2 [Source:HGNC Symbol;Acc:HGNC:9835]	15345153	15373512	-	77879	upstream
chr11	ALDBSSCT0000002034	ALDBSSCG0000001229	--	Annotated_lncRNA	76561511	76611190	-	ENSSSCT00000031843	ENSSSCG00000027231	--	--	76533056	76547283	+	14227	downstream
chr11	ALDBSSCT0000002034	ALDBSSCG0000001229	--	Annotated_lncRNA	76561511	76611190	-	ENSSSCT00000010442	ENSSSCG00000009524	TMTC4	transmembrane and tetratricopeptide repeat containing 4 [Source:HGNC Symbol;Acc:HGNC:25904]	76624584	76698938	-	13393	downstream
chr11	ALDBSSCT0000002034	ALDBSSCG0000001229	--	Annotated_lncRNA	76561511	76611190	-	ENSSSCT00000010441	ENSSSCG00000009523	GGACT	gamma-glutamylamine cyclotransferase [Source:HGNC Symbol;Acc:HGNC:25100]	76549455	76549907	-	11603	upstream
chr18	ALDBSSCT0000005708	ALDBSSCG0000003464	--	Annotated_lncRNA	42159865	42170214	-	ENSSSCT00000024969	ENSSSCG00000027389	--	--	42190501	42212634	+	20286	upstream
chr18	ALDBSSCT0000005708	ALDBSSCG0000003464	--	Annotated_lncRNA	42159865	42170214	-	ENSSSCT00000018140	ENSSSCG00000016661	2017-09-07	septin 7 [Source:HGNC Symbol;Acc:HGNC:1717]	41967526	42068931	-	90933	upstream
chr15	LNC_000367	XLOC_030229	--	Novel_lncRNA	134103865	134106064	-	ENSSSCT00000017645	ENSSSCG00000016204	IHH	indian hedgehog [Source:HGNC Symbol;Acc:HGNC:5956]	134122695	134129391	-	16630	downstream
chr15	LNC_000367	XLOC_030229	--	Novel_lncRNA	134103865	134106064	-	ENSSSCT00000017644	ENSSSCG00000016203	CFAP65	cilia and flagella associated protein 65 [Source:HGNC Symbol;Acc:HGNC:25325]	134087004	134103779	-	85	upstream
chr15	LNC_000367	XLOC_030229	--	Novel_lncRNA	134103865	134106064	-	ENSSSCT00000032179	ENSSSCG00000026958	--	--	134033487	134033948	-	69916	upstream
chr15	LNC_000367	XLOC_030229	--	Novel_lncRNA	134103865	134106064	-	ENSSSCT00000017646	ENSSSCG00000016205	NHEJ1	non-homologous end joining factor 1 [Source:HGNC Symbol;Acc:HGNC:25737]	134145208	134232523	-	39143	downstream
chr15	LNC_000366	XLOC_030074	--	Novel_lncRNA	120677848	120680819	-	ENSSSCT00000031612	ENSSSCG00000023713	--	--	120723007	120727611	-	42187	downstream
chr15	LNC_000365	XLOC_029970	--	Novel_lncRNA	110977074	110983193	-	ENSSSCT00000028914	ENSSSCG00000021044	HECW2	HECT, C2 and WW domain containing E3 ubiquitin protein ligase 2 [Source:HGNC Symbol;Acc:HGNC:29853]	111065450	111104670	+	82256	upstream
chr15	LNC_000365	XLOC_029970	--	Novel_lncRNA	110977074	110983193	-	ENSSSCT00000017493	ENSSSCG00000016067	STK17B	serine/threonine kinase 17b [Source:HGNC Symbol;Acc:HGNC:11396]	111029414	111052824	-	46220	downstream
chr15	LNC_000363	XLOC_029610	--	Novel_lncRNA	74601870	74607949	-	ENSSSCT00000031340	ENSSSCG00000030128	--	--	74674351	74709612	+	66401	upstream
chr15	LNC_000363	XLOC_029610	--	Novel_lncRNA	74601870	74607949	-	ENSSSCT00000017300	ENSSSCG00000015888	RBMS1	RNA binding motif, single stranded interacting protein 1 [Source:HGNC Symbol;Acc:HGNC:9907]	74421208	74547477	-	54392	upstream
chr15	LNC_000362	XLOC_029530	--	Novel_lncRNA	71805448	71808657	-	ENSSSCT00000017285	ENSSSCG00000015874	ACVR1	activin A receptor type I [Source:HGNC Symbol;Acc:HGNC:171]	71682577	71745410	-	60037	upstream
chr15	LNC_000361	XLOC_029279	--	Novel_lncRNA	34654400	34655145	-	ENSSSCT00000017129	ENSSSCG00000015729	TSN	translin [Source:HGNC Symbol;Acc:HGNC:12379]	34655273	34661441	+	127	upstream
chr15	LNC_000361	XLOC_029279	--	Novel_lncRNA	34654400	34655145	-	ENSSSCT00000024092	ENSSSCG00000027791	--	--	34740914	34928241	+	85768	upstream
chr15	LNC_000361	XLOC_029279	--	Novel_lncRNA	34654400	34655145	-	ENSSSCT00000017130	ENSSSCG00000015730	NIFK	-	34678356	34692425	+	23210	upstream
chr15	LNC_000360	XLOC_029273	--	Novel_lncRNA	28764586	28766177	-	ENSSSCT00000022881	ENSSSCG00000030354	MAP3K2	mitogen-activated protein kinase kinase kinase 2 [Source:HGNC Symbol;Acc:HGNC:6854]	28820394	28858148	+	54216	upstream
chr15	LNC_000360	XLOC_029273	--	Novel_lncRNA	28764586	28766177	-	ENSSSCT00000026256	ENSSSCG00000023693	PROC	protein C, inactivator of coagulation factors Va and VIIIa [Source:HGNC Symbol;Acc:HGNC:9451]	28724895	28735705	-	28880	upstream
chr15	LNC_000360	XLOC_029273	--	Novel_lncRNA	28764586	28766177	-	ENSSSCT00000030086	ENSSSCG00000030354	MAP3K2	mitogen-activated protein kinase kinase kinase 2 [Source:HGNC Symbol;Acc:HGNC:6854]	28766306	28858148	+	128	upstream
chr6	LNC_000569	XLOC_049891	--	Novel_lncRNA	58040032	58044071	+	ENSSSCT00000003698	ENSSSCG00000003331	TNFRSF4	tumor necrosis factor receptor superfamily member 4 [Source:HGNC Symbol;Acc:HGNC:11918]	58011601	58014416	+	25615	downstream
chr6	LNC_000569	XLOC_049891	--	Novel_lncRNA	58040032	58044071	+	ENSSSCT00000003697	ENSSSCG00000003330	TNFRSF18	tumor necrosis factor receptor superfamily member 18 [Source:HGNC Symbol;Acc:HGNC:11914]	58019251	58021622	+	18409	downstream
chr6	LNC_000569	XLOC_049891	--	Novel_lncRNA	58040032	58044071	+	ENSSSCT00000003696	ENSSSCG00000003329	ACAP3	ArfGAP with coiled-coil, ankyrin repeat and PH domains 3 [Source:HGNC Symbol;Acc:HGNC:16754]	58048101	58058468	-	4029	downstream
chr6	LNC_000569	XLOC_049891	--	Novel_lncRNA	58040032	58044071	+	ENSSSCT00000029719	ENSSSCG00000021880	MXRA8	matrix-remodelling associated 8 [Source:HGNC Symbol;Acc:HGNC:7542]	58129042	58134259	-	84970	downstream
chr6	LNC_000569	XLOC_049891	--	Novel_lncRNA	58040032	58044071	+	ENSSSCT00000003699	ENSSSCG00000003332	SDF4	stromal cell derived factor 4 [Source:HGNC Symbol;Acc:HGNC:24188]	57998325	58008413	+	31618	downstream
chr6	LNC_000569	XLOC_049891	--	Novel_lncRNA	58040032	58044071	+	ENSSSCT00000024059	ENSSSCG00000024430	HES4	hes family bHLH transcription factor 4 [Source:HGNC Symbol;Acc:HGNC:24149]	57945476	57946990	+	93041	downstream
chr6	LNC_000569	XLOC_049891	--	Novel_lncRNA	58040032	58044071	+	ENSSSCT00000003701	ENSSSCG00000003334	UBE2J2	ubiquitin conjugating enzyme E2, J2 [Source:HGNC Symbol;Acc:HGNC:19268]	57969755	57982129	+	57902	downstream
chr6	LNC_000569	XLOC_049891	--	Novel_lncRNA	58040032	58044071	+	ENSSSCT00000003700	ENSSSCG00000003333	FAM132A	family with sequence similarity 132 member A [Source:HGNC Symbol;Acc:HGNC:32308]	57985130	57989331	+	50700	downstream
chr6	LNC_000569	XLOC_049891	--	Novel_lncRNA	58040032	58044071	+	ENSSSCT00000003703	ENSSSCG00000003336	TTLL10	tubulin tyrosine ligase like 10 [Source:HGNC Symbol;Acc:HGNC:26693]	58034640	58039789	+	242	downstream
chr6	LNC_000569	XLOC_049891	--	Novel_lncRNA	58040032	58044071	+	ENSSSCT00000035295	ENSSSCG00000030870	TNFRSF18	-	58019344	58019506	-	20525	upstream
chr6	LNC_000569	XLOC_049891	--	Novel_lncRNA	58040032	58044071	+	ENSSSCT00000031335	ENSSSCG00000030505	--	--	57934193	57942570	+	97461	downstream
chr6	LNC_000569	XLOC_049891	--	Novel_lncRNA	58040032	58044071	+	ENSSSCT00000023773	ENSSSCG00000022151	B3GALT6	Beta-1,3-galactosyltransferase 6 [Source:HGNC Symbol;Acc:HGNC:17978]	57997153	57998124	-	41907	upstream
chr6	LNC_000569	XLOC_049891	--	Novel_lncRNA	58040032	58044071	+	ENSSSCT00000003708	ENSSSCG00000003339	CPSF3L	cleavage and polyadenylation specific factor 3-like [Source:HGNC Symbol;Acc:HGNC:26052]	58092873	58105986	-	48801	downstream
chr6	LNC_000569	XLOC_049891	--	Novel_lncRNA	58040032	58044071	+	ENSSSCT00000003709	ENSSSCG00000003340	CPTP	ceramide-1-phosphate transfer protein [Source:HGNC Symbol;Acc:HGNC:28116]	58108616	58109437	+	64544	upstream
chr6	LNC_000569	XLOC_049891	--	Novel_lncRNA	58040032	58044071	+	ENSSSCT00000003710	ENSSSCG00000003341	TAS1R3	taste 1 receptor member 3 [Source:HGNC Symbol;Acc:HGNC:15661]	58111612	58115907	+	67540	upstream
chr6	LNC_000569	XLOC_049891	--	Novel_lncRNA	58040032	58044071	+	ENSSSCT00000003711	ENSSSCG00000003342	DVL1	dishevelled segment polarity protein 1 [Source:HGNC Symbol;Acc:HGNC:3084]	58116729	58126973	-	72657	downstream
chr6	LNC_000569	XLOC_049891	--	Novel_lncRNA	58040032	58044071	+	ENSSSCT00000003707	ENSSSCG00000003338	PUSL1	pseudouridylate synthase-like 1 [Source:HGNC Symbol;Acc:HGNC:26914]	58092108	58094373	+	48036	upstream
chr6	LNC_000569	XLOC_049891	--	Novel_lncRNA	58040032	58044071	+	ENSSSCT00000030593	ENSSSCG00000027991	SCNN1D	sodium channel, non voltage gated 1 delta subunit [Source:HGNC Symbol;Acc:HGNC:10601]	58045649	58047446	+	1577	upstream
chr6	LNC_000568	XLOC_049874	--	Novel_lncRNA	57744214	57750902	+	ENSSSCT00000030737	ENSSSCG00000026816	--	--	57838957	57843785	-	88054	downstream
chr6	LNC_000568	XLOC_049874	--	Novel_lncRNA	57744214	57750902	+	ENSSSCT00000027815	ENSSSCG00000027987	ZNF132	zinc finger protein 132 [Source:HGNC Symbol;Acc:HGNC:12916]	57737839	57741481	-	2732	upstream
chr6	LNC_000568	XLOC_049874	--	Novel_lncRNA	57744214	57750902	+	ENSSSCT00000004425	ENSSSCG00000004002	RPS5	ribosomal protein S5 [Source:HGNC Symbol;Acc:HGNC:10426]	57686353	57692238	+	51975	downstream
chr6	LNC_000568	XLOC_049874	--	Novel_lncRNA	57744214	57750902	+	ENSSSCT00000004424	ENSSSCG00000004001	A1BG	alpha-1-B glycoprotein [Source:HGNC Symbol;Acc:HGNC:5]	57653259	57657524	-	86689	upstream
chr6	LNC_000568	XLOC_049874	--	Novel_lncRNA	57744214	57750902	+	ENSSSCT00000004427	ENSSSCG00000004004	ZNF584	zinc finger protein 584 [Source:HGNC Symbol;Acc:HGNC:27318]	57712692	57722153	+	22060	downstream
chr6	LNC_000568	XLOC_049874	--	Novel_lncRNA	57744214	57750902	+	ENSSSCT00000029564	ENSSSCG00000027987	ZNF132	zinc finger protein 132 [Source:HGNC Symbol;Acc:HGNC:12916]	57737791	57741493	-	2720	upstream
chr6	LNC_000568	XLOC_049874	--	Novel_lncRNA	57744214	57750902	+	ENSSSCT00000027686	ENSSSCG00000024797	C1orf159	chromosome 1 open reading frame 159 [Source:HGNC Symbol;Acc:HGNC:26062]	57819109	57828758	+	68206	upstream
chr3	ALDBSSCT0000007129	ALDBSSCG0000004336	--	Annotated_lncRNA	44332952	44344013	-	ENSSSCT00000008852	ENSSSCG00000008079	FAM120A	family with sequence similarity 120A [Source:HGNC Symbol;Acc:HGNC:13247]	44241917	44330948	+	2003	downstream
chr3	ALDBSSCT0000007129	ALDBSSCG0000004336	--	Annotated_lncRNA	44332952	44344013	-	ENSSSCT00000008853	ENSSSCG00000008080	PHF2	PHD finger protein 2 [Source:HGNC Symbol;Acc:HGNC:8920]	44404270	44434191	+	60256	upstream
chr6	LNC_000561	XLOC_048873	--	Novel_lncRNA	117994	173206	+	ENSSSCT00000002927	ENSSSCG00000002637	DBNDD1	dysbindin (dystrobrevin binding protein 1) domain containing 1 [Source:HGNC Symbol;Acc:HGNC:28455]	98891	223165	-	-55213	antisense
chr6	LNC_000561	XLOC_048873	--	Novel_lncRNA	117994	173206	+	ENSSSCT00000002925	ENSSSCG00000002636	TCF25	transcription factor 25 (basic helix-loop-helix) [Source:HGNC Symbol;Acc:HGNC:29181]	231306	235927	-	58099	downstream
chr6	LNC_000561	XLOC_048873	--	Novel_lncRNA	117994	173206	+	ENSSSCT00000002922	ENSSSCG00000002633	GAS8	growth arrest specific 8 [Source:HGNC Symbol;Acc:HGNC:4166]	179207	198145	-	6000	downstream
chr6	LNC_000561	XLOC_048873	--	Novel_lncRNA	117994	173206	+	ENSSSCT00000002929	ENSSSCG00000002639	TUBB3	tubulin beta 3 class III [Source:HGNC Symbol;Acc:HGNC:20772]	259395	268749	+	86188	upstream
chr6	LNC_000561	XLOC_048873	--	Novel_lncRNA	117994	173206	+	ENSSSCT00000027926	ENSSSCG00000029761	--	--	179207	183358	+	6000	upstream
chr6	LNC_000561	XLOC_048873	--	Novel_lncRNA	117994	173206	+	ENSSSCT00000022890	ENSSSCG00000026662	PRDM7	PR domain containing 7 [Source:HGNC Symbol;Acc:HGNC:9351]	126252	138678	-	-12427	antisense
chr6	LNC_000561	XLOC_048873	--	Novel_lncRNA	117994	173206	+	ENSSSCT00000022534	ENSSSCG00000020924	MC1R	melanocortin 1 receptor (alpha melanocyte stimulating hormone receptor) [Source:HGNC Symbol;Acc:HGNC:6929]	255611	256573	+	82404	upstream
chr5	LNC_000560	XLOC_048810	--	Novel_lncRNA	105186345	105194236	-	ENSSSCT00000001028	ENSSSCG00000000940	--	--	105054245	105191159	+	-4815	antisense
chr5	LNC_000560	XLOC_048810	--	Novel_lncRNA	105186345	105194236	-	ENSSSCT00000028209	ENSSSCG00000021629	--	--	105229194	105235765	-	34957	downstream
chr5	LNC_000560	XLOC_048810	--	Novel_lncRNA	105186345	105194236	-	ENSSSCT00000001027	ENSSSCG00000000939	ACSS3	acyl-CoA synthetase short-chain family member 3 [Source:HGNC Symbol;Acc:HGNC:24723]	105196506	105368281	-	2269	downstream
chr6	LNC_000563	XLOC_049346	--	Novel_lncRNA	33613189	33619644	+	ENSSSCT00000003151	ENSSSCG00000002850	RPLP2	ribosomal protein, large, P2 [Source:HGNC Symbol;Acc:HGNC:10377]	33613003	33613350	-	-162	antisense
chr6	LNC_000562	XLOC_049297	--	Novel_lncRNA	33042241	33065892	+	ENSSSCT00000003147	ENSSSCG00000002846	DNAJA2	DnaJ heat shock protein family (Hsp40) member A2 [Source:HGNC Symbol;Acc:HGNC:14884]	32930420	32943465	-	98775	upstream
chr6	LNC_000562	XLOC_049297	--	Novel_lncRNA	33042241	33065892	+	ENSSSCT00000035203	ENSSSCG00000002846	DNAJA2	DnaJ heat shock protein family (Hsp40) member A2 [Source:HGNC Symbol;Acc:HGNC:14884]	32930639	32943465	-	98775	upstream
chr6	LNC_000562	XLOC_049297	--	Novel_lncRNA	33042241	33065892	+	ENSSSCT00000026506	ENSSSCG00000022333	C16orf87	chromosome 16 open reading frame 87 [Source:HGNC Symbol;Acc:HGNC:33754]	33099684	33107320	-	33791	downstream
chr6	LNC_000565	XLOC_049405	--	Novel_lncRNA	36049145	36054037	+	ENSSSCT00000024971	ENSSSCG00000029234	ZNF536	zinc finger protein 536 [Source:HGNC Symbol;Acc:HGNC:29025]	35981469	36039550	+	9594	downstream
chr6	LNC_000565	XLOC_049405	--	Novel_lncRNA	36049145	36054037	+	ENSSSCT00000026089	ENSSSCG00000029234	ZNF536	zinc finger protein 536 [Source:HGNC Symbol;Acc:HGNC:29025]	35981469	36038933	+	10211	downstream
chr6	LNC_000567	XLOC_049623	--	Novel_lncRNA	46364316	46380651	+	ENSSSCT00000003409	ENSSSCG00000003072	ZNF283	zinc finger protein 283 [Source:HGNC Symbol;Acc:HGNC:13077]	46472682	46489035	+	92030	upstream
chr6	LNC_000567	XLOC_049623	--	Novel_lncRNA	46364316	46380651	+	ENSSSCT00000031768	ENSSSCG00000003067	--	--	46407343	46409119	+	26691	upstream
chr6	LNC_000567	XLOC_049623	--	Novel_lncRNA	46364316	46380651	+	ENSSSCT00000003406	ENSSSCG00000003069	KCNN4	potassium channel, calcium activated intermediate/small conductance subfamily N alpha, member 4 [Source:HGNC Symbol;Acc:HGNC:6293]	46440881	46454405	-	60229	downstream
chr6	LNC_000567	XLOC_049623	--	Novel_lncRNA	46364316	46380651	+	ENSSSCT00000036656	ENSSSCG00000003065	PLAUR	plasminogen activator, urokinase receptor [Source:HGNC Symbol;Acc:HGNC:9053]	46349487	46365407	-	-1092	antisense
chr6	LNC_000567	XLOC_049623	--	Novel_lncRNA	46364316	46380651	+	ENSSSCT00000003404	ENSSSCG00000003067	--	--	46407223	46409158	+	26571	upstream
chr6	LNC_000567	XLOC_049623	--	Novel_lncRNA	46364316	46380651	+	ENSSSCT00000003405	ENSSSCG00000003068	SMG9	SMG9 nonsense mediated mRNA decay factor [Source:HGNC Symbol;Acc:HGNC:25763]	46410754	46430695	-	30102	downstream
chr6	LNC_000567	XLOC_049623	--	Novel_lncRNA	46364316	46380651	+	ENSSSCT00000003402	ENSSSCG00000003065	PLAUR	plasminogen activator, urokinase receptor [Source:HGNC Symbol;Acc:HGNC:9053]	46349485	46365060	-	-745	antisense
chr6	LNC_000567	XLOC_049623	--	Novel_lncRNA	46364316	46380651	+	ENSSSCT00000003403	ENSSSCG00000003066	IRGC	immunity-related GTPase family, cinema [Source:HGNC Symbol;Acc:HGNC:28835]	46399976	46403321	+	19324	upstream
chr6	LNC_000567	XLOC_049623	--	Novel_lncRNA	46364316	46380651	+	ENSSSCT00000035015	ENSSSCG00000003065	PLAUR	plasminogen activator, urokinase receptor [Source:HGNC Symbol;Acc:HGNC:9053]	46349481	46351981	-	12334	upstream
chr6	LNC_000567	XLOC_049623	--	Novel_lncRNA	46364316	46380651	+	ENSSSCT00000003398	ENSSSCG00000003061	CADM4	cell adhesion molecule 4 [Source:HGNC Symbol;Acc:HGNC:30825]	46217032	46327364	-	36951	upstream
chr6	LNC_000567	XLOC_049623	--	Novel_lncRNA	46364316	46380651	+	ENSSSCT00000003399	ENSSSCG00000003062	LYPD3	LY6/PLAUR domain containing 3 [Source:HGNC Symbol;Acc:HGNC:24880]	46263688	46267709	+	96606	downstream
chr6	LNC_000567	XLOC_049623	--	Novel_lncRNA	46364316	46380651	+	ENSSSCT00000003410	ENSSSCG00000003073	LYPD5	LY6/PLAUR domain containing 5 [Source:HGNC Symbol;Acc:HGNC:26397]	46468963	46470609	-	88311	downstream
chr18	ALDBSSCT0000005637	ALDBSSCG0000003416	--	Annotated_lncRNA	7715212	7715795	-	ENSSSCT00000017942	ENSSSCG00000016478	PRSS2	-	7761371	7764639	-	45575	downstream
chr18	ALDBSSCT0000005637	ALDBSSCG0000003416	--	Annotated_lncRNA	7715212	7715795	-	ENSSSCT00000017943	ENSSSCG00000016479	TRBV19	T cell receptor beta variable 19 [Source:HGNC Symbol;Acc:HGNC:12194]	7776934	7777450	+	61138	upstream
chr18	ALDBSSCT0000005637	ALDBSSCG0000003416	--	Annotated_lncRNA	7715212	7715795	-	ENSSSCT00000017940	ENSSSCG00000016476	TRBV21OR9-2	T cell receptor beta variable 21/OR9-2 (pseudogene) [Source:HGNC Symbol;Acc:HGNC:12199]	7756189	7823672	-	40393	downstream
chr18	ALDBSSCT0000005637	ALDBSSCG0000003416	--	Annotated_lncRNA	7715212	7715795	-	ENSSSCT00000017941	ENSSSCG00000016477	TRBV24-1	T cell receptor beta variable 24-1 [Source:HGNC Symbol;Acc:HGNC:12203]	7811001	7811502	-	95205	downstream
chr18	ALDBSSCT0000005637	ALDBSSCG0000003416	--	Annotated_lncRNA	7715212	7715795	-	ENSSSCT00000017944	ENSSSCG00000016480	--	--	7782247	7783040	+	66451	upstream
chr18	ALDBSSCT0000005637	ALDBSSCG0000003416	--	Annotated_lncRNA	7715212	7715795	-	ENSSSCT00000029092	ENSSSCG00000016475	--	--	7722752	7744123	-	6956	downstream
chr18	ALDBSSCT0000005637	ALDBSSCG0000003416	--	Annotated_lncRNA	7715212	7715795	-	ENSSSCT00000017937	ENSSSCG00000016473	--	--	7652955	7658739	-	56472	upstream
chr18	ALDBSSCT0000005637	ALDBSSCG0000003416	--	Annotated_lncRNA	7715212	7715795	-	ENSSSCT00000017933	ENSSSCG00000016469	TRPV6	transient receptor potential cation channel, subfamily V, member 6 [Source:HGNC Symbol;Acc:HGNC:14006]	7636965	7652271	+	62940	downstream
chr18	ALDBSSCT0000005637	ALDBSSCG0000003416	--	Annotated_lncRNA	7715212	7715795	-	ENSSSCT00000025084	ENSSSCG00000016475	--	--	7722752	7730334	-	6956	downstream
chr18	ALDBSSCT0000005637	ALDBSSCG0000003416	--	Annotated_lncRNA	7715212	7715795	-	ENSSSCT00000017939	ENSSSCG00000016475	--	--	7724092	7744165	-	8296	downstream
chr14	ALDBSSCT0000003811	ALDBSSCG0000002292	--	Annotated_lncRNA	15969023	15994782	-	ENSSSCT00000031727	ENSSSCG00000022383	GATA4	GATA binding protein 4 [Source:HGNC Symbol;Acc:HGNC:4173]	16073218	16124413	+	78435	upstream
chr14	ALDBSSCT0000003811	ALDBSSCG0000002292	--	Annotated_lncRNA	15969023	15994782	-	ENSSSCT00000025629	ENSSSCG00000027568	--	--	15915885	15933527	+	35495	downstream
chr16	ALDBSSCT0000004812	ALDBSSCG0000002924	--	Annotated_lncRNA	56277315	56331424	+	ENSSSCT00000032305	ENSSSCG00000023948	UBTD2	ubiquitin domain containing 2 [Source:HGNC Symbol;Acc:HGNC:24463]	56400841	56422437	+	69416	upstream
chr16	ALDBSSCT0000004812	ALDBSSCG0000002924	--	Annotated_lncRNA	56277315	56331424	+	ENSSSCT00000018507	ENSSSCG00000016995	--	--	56427182	56434606	-	95757	downstream
chr16	ALDBSSCT0000004812	ALDBSSCG0000002924	--	Annotated_lncRNA	56277315	56331424	+	ENSSSCT00000024674	ENSSSCG00000027378	SH3PXD2B	SH3 and PX domains 2B [Source:HGNC Symbol;Acc:HGNC:29242]	56137621	56228713	+	48601	downstream
chr16	ALDBSSCT0000004812	ALDBSSCG0000002924	--	Annotated_lncRNA	56277315	56331424	+	ENSSSCT00000018508	ENSSSCG00000016996	--	--	56338239	56353011	+	6814	upstream
chr17	ALDBSSCT0000005146	ALDBSSCG0000003101	--	Annotated_lncRNA	32125641	32136649	+	ENSSSCT00000007778	ENSSSCG00000007106	INSM1	insulinoma associated 1 [Source:HGNC Symbol;Acc:HGNC:6090]	32162172	32163419	-	25522	downstream
chr17	ALDBSSCT0000005145	ALDBSSCG0000003100	--	Annotated_lncRNA	31315685	31364884	+	ENSSSCT00000024048	ENSSSCG00000007100	SLC24A3	solute carrier family 24 (sodium/potassium/calcium exchanger), member 3 [Source:HGNC Symbol;Acc:HGNC:10977]	31405284	31467254	-	40399	downstream
chr17	ALDBSSCT0000005145	ALDBSSCG0000003100	--	Annotated_lncRNA	31315685	31364884	+	ENSSSCT00000007772	ENSSSCG00000007100	SLC24A3	solute carrier family 24 (sodium/potassium/calcium exchanger), member 3 [Source:HGNC Symbol;Acc:HGNC:10977]	31405284	31467254	-	40399	downstream
chr17	ALDBSSCT0000005145	ALDBSSCG0000003100	--	Annotated_lncRNA	31315685	31364884	+	ENSSSCT00000028523	ENSSSCG00000007100	SLC24A3	solute carrier family 24 (sodium/potassium/calcium exchanger), member 3 [Source:HGNC Symbol;Acc:HGNC:10977]	31405284	31467254	-	40399	downstream
chr10	ALDBSSCT0000001134	ALDBSSCG0000000703	--	Annotated_lncRNA	14763728	14795679	+	ENSSSCT00000032127	ENSSSCG00000025686	KMO	kynurenine 3-monooxygenase (kynurenine 3-hydroxylase) [Source:HGNC Symbol;Acc:HGNC:6381]	14889942	14937373	+	94262	upstream
chr10	ALDBSSCT0000001134	ALDBSSCG0000000703	--	Annotated_lncRNA	14763728	14795679	+	ENSSSCT00000030683	ENSSSCG00000028178	FH	fumarate hydratase [Source:RefSeq peptide;Acc:NP_001230517]	14852719	14879014	-	57039	downstream
chr10	ALDBSSCT0000001132	ALDBSSCG0000000703	--	Annotated_lncRNA	14763689	14795679	+	ENSSSCT00000032127	ENSSSCG00000025686	KMO	kynurenine 3-monooxygenase (kynurenine 3-hydroxylase) [Source:HGNC Symbol;Acc:HGNC:6381]	14889942	14937373	+	94262	upstream
chr10	ALDBSSCT0000001132	ALDBSSCG0000000703	--	Annotated_lncRNA	14763689	14795679	+	ENSSSCT00000030683	ENSSSCG00000028178	FH	fumarate hydratase [Source:RefSeq peptide;Acc:NP_001230517]	14852719	14879014	-	57039	downstream
chr10	ALDBSSCT0000001131	ALDBSSCG0000000703	--	Annotated_lncRNA	14763409	14810188	+	ENSSSCT00000032127	ENSSSCG00000025686	KMO	kynurenine 3-monooxygenase (kynurenine 3-hydroxylase) [Source:HGNC Symbol;Acc:HGNC:6381]	14889942	14937373	+	79753	upstream
chr10	ALDBSSCT0000001131	ALDBSSCG0000000703	--	Annotated_lncRNA	14763409	14810188	+	ENSSSCT00000030683	ENSSSCG00000028178	FH	fumarate hydratase [Source:RefSeq peptide;Acc:NP_001230517]	14852719	14879014	-	42530	downstream
chr3	ALDBSSCT0000007239	ALDBSSCG0000004392	--	Annotated_lncRNA	83852624	83867867	-	ENSSSCT00000009172	ENSSSCG00000008377	CCT4	chaperonin containing TCP1, subunit 4 (delta) [Source:HGNC Symbol;Acc:HGNC:1617]	83760113	83777463	+	75160	downstream
chr3	ALDBSSCT0000007239	ALDBSSCG0000004392	--	Annotated_lncRNA	83852624	83867867	-	ENSSSCT00000009173	ENSSSCG00000008378	FAM161A	family with sequence similarity 161 member A [Source:HGNC Symbol;Acc:HGNC:25808]	83788448	83814343	+	38280	downstream
chr14	ALDBSSCT0000003928	ALDBSSCG0000002363	--	Annotated_lncRNA	58486483	58496124	-	ENSSSCT00000011105	ENSSSCG00000010143	MTR	5-methyltetrahydrofolate-homocysteine methyltransferase [Source:HGNC Symbol;Acc:HGNC:7468]	58497683	58618862	-	1558	downstream
chr18	ALDBSSCT0000005568	ALDBSSCG0000003370	--	Annotated_lncRNA	53406194	53422408	+	ENSSSCT00000018200	ENSSSCG00000016719	STK31	serine/threonine kinase 31 [Source:HGNC Symbol;Acc:HGNC:11407]	53278001	53339529	-	66664	upstream
chr18	ALDBSSCT0000005568	ALDBSSCG0000003370	--	Annotated_lncRNA	53406194	53422408	+	ENSSSCT00000018201	ENSSSCG00000016720	PGAM2	phosphoglycerate mutase 2 [Source:HGNC Symbol;Acc:HGNC:8889]	53423634	53425884	+	1225	upstream
chr18	ALDBSSCT0000005568	ALDBSSCG0000003370	--	Annotated_lncRNA	53406194	53422408	+	ENSSSCT00000018202	ENSSSCG00000016721	DBNL	drebrin-like [Source:HGNC Symbol;Acc:HGNC:2696]	53426424	53438727	-	4015	downstream
chr18	ALDBSSCT0000005568	ALDBSSCG0000003370	--	Annotated_lncRNA	53406194	53422408	+	ENSSSCT00000018203	ENSSSCG00000016722	UBE2D4	ubiquitin conjugating enzyme E2D 4 (putative) [Source:HGNC Symbol;Acc:HGNC:21647]	53448350	53469535	-	25941	downstream
chr18	ALDBSSCT0000005568	ALDBSSCG0000003370	--	Annotated_lncRNA	53406194	53422408	+	ENSSSCT00000018204	ENSSSCG00000016723	URGCP	upregulator of cell proliferation [Source:HGNC Symbol;Acc:HGNC:30890]	53511905	53531295	+	89496	upstream
chr10	ALDBSSCT0000001627	ALDBSSCG0000000986	--	Annotated_lncRNA	76934566	76936080	-	ENSSSCT00000012233	ENSSSCG00000011171	CTSV	Cathepsin L1 Cathepsin L1 heavy chain Cathepsin L1 light chain [Source:UniProtKB/Swiss-Prot;Acc:Q28944]	76997766	77003512	+	61685	upstream
chr1	LNC_000178	XLOC_012996	--	Novel_lncRNA	293395208	293401531	-	ENSSSCT00000029292	ENSSSCG00000029825	CNTRL	centriolin [Source:HGNC Symbol;Acc:HGNC:1858]	293302882	293310134	-	85073	upstream
chr1	LNC_000178	XLOC_012996	--	Novel_lncRNA	293395208	293401531	-	ENSSSCT00000006064	ENSSSCG00000005514	RAB14	RAB14, member RAS oncogene family [Source:HGNC Symbol;Acc:HGNC:16524]	293477531	293504330	+	75999	upstream
chr1	LNC_000179	XLOC_012996	--	Novel_lncRNA	293414014	293417964	-	ENSSSCT00000006067	ENSSSCG00000005516	STOM	stomatin [Source:HGNC Symbol;Acc:HGNC:3383]	293510864	293528679	-	92899	downstream
chr1	LNC_000179	XLOC_012996	--	Novel_lncRNA	293414014	293417964	-	ENSSSCT00000006064	ENSSSCG00000005514	RAB14	RAB14, member RAS oncogene family [Source:HGNC Symbol;Acc:HGNC:16524]	293477531	293504330	+	59566	upstream
chr1	LNC_000176	XLOC_012786	--	Novel_lncRNA	266618904	266621914	-	ENSSSCT00000005896	ENSSSCG00000005356	DCAF10	DDB1 and CUL4 associated factor 10 [Source:HGNC Symbol;Acc:HGNC:23686]	266502565	266612327	+	6576	downstream
chr1	LNC_000176	XLOC_012786	--	Novel_lncRNA	266618904	266621914	-	ENSSSCT00000005898	ENSSSCG00000005358	--	--	266638427	266670705	+	16512	upstream
chr1	LNC_000177	XLOC_012829	--	Novel_lncRNA	269793234	269811346	-	ENSSSCT00000005928	ENSSSCG00000005386	STX17	syntaxin 17 [Source:HGNC Symbol;Acc:HGNC:11432]	269898456	270003564	+	87109	upstream
chr1	LNC_000177	XLOC_012829	--	Novel_lncRNA	269793234	269811346	-	ENSSSCT00000005926	ENSSSCG00000005385	NR4A3	nuclear receptor subfamily 4 group A member 3 [Source:HGNC Symbol;Acc:HGNC:7982]	269817145	269835410	+	5798	upstream
chr1	LNC_000177	XLOC_012829	--	Novel_lncRNA	269793234	269811346	-	ENSSSCT00000005925	ENSSSCG00000005385	NR4A3	nuclear receptor subfamily 4 group A member 3 [Source:HGNC Symbol;Acc:HGNC:7982]	269817145	269852707	+	5798	upstream
chr1	LNC_000174	XLOC_012435	--	Novel_lncRNA	224788037	224792315	-	ENSSSCT00000031027	ENSSSCG00000025036	--	--	224827505	224828059	+	35189	upstream
chr1	LNC_000174	XLOC_012435	--	Novel_lncRNA	224788037	224792315	-	ENSSSCT00000005677	ENSSSCG00000005149	IFN-DELTA-1	-	224699121	224699633	-	88403	upstream
chr1	LNC_000174	XLOC_012435	--	Novel_lncRNA	224788037	224792315	-	ENSSSCT00000029714	ENSSSCG00000022426	IFN-ALPHA-17	Sus scrofa interferon-alpha-17 (IFN-ALPHA-17), mRNA. [Source:RefSeq mRNA;Acc:NM_001195375]	224642688	224694151	-	93885	upstream
chr1	LNC_000174	XLOC_012435	--	Novel_lncRNA	224788037	224792315	-	ENSSSCT00000030084	ENSSSCG00000028296	--	--	224816424	224816969	+	24108	upstream
chr1	LNC_000174	XLOC_012435	--	Novel_lncRNA	224788037	224792315	-	ENSSSCT00000033639	ENSSSCG00000030909	IFN-DELTA-3	-	224787630	224788146	+	-110	antisense
chr1	LNC_000174	XLOC_012435	--	Novel_lncRNA	224788037	224792315	-	ENSSSCT00000023958	ENSSSCG00000022426	IFN-ALPHA-17	Sus scrofa interferon-alpha-17 (IFN-ALPHA-17), mRNA. [Source:RefSeq mRNA;Acc:NM_001195375]	224610923	224694151	-	93885	upstream
chr1	LNC_000174	XLOC_012435	--	Novel_lncRNA	224788037	224792315	-	ENSSSCT00000027215	ENSSSCG00000027162	--	--	224730487	224801189	+	-4279	antisense
chr1	LNC_000174	XLOC_012435	--	Novel_lncRNA	224788037	224792315	-	ENSSSCT00000026435	ENSSSCG00000028884	IFN-OMEGA-2	-	224835908	224991996	+	43592	upstream
chr10	ALDBSSCT0000001628	ALDBSSCG0000000987	--	Annotated_lncRNA	77611515	77624358	-	ENSSSCT00000023307	ENSSSCG00000023247	OPTN	optineurin [Source:HGNC Symbol;Acc:HGNC:17142]	77690723	77740523	-	66364	downstream
chr10	ALDBSSCT0000001628	ALDBSSCG0000000987	--	Annotated_lncRNA	77611515	77624358	-	ENSSSCT00000030870	ENSSSCG00000021188	--	--	77671884	77682366	-	47525	downstream
chr1	LNC_000172	XLOC_012368	--	Novel_lncRNA	210360300	210373726	-	ENSSSCT00000005604	ENSSSCG00000005084	PPM1A	protein phosphatase, Mg2+/Mn2+ dependent 1A [Source:HGNC Symbol;Acc:HGNC:9275]	210390699	210401098	+	16972	upstream
chr1	LNC_000172	XLOC_012368	--	Novel_lncRNA	210360300	210373726	-	ENSSSCT00000005603	ENSSSCG00000005083	DHRS7	dehydrogenase/reductase (SDR family) member 7 [Source:HGNC Symbol;Acc:HGNC:21524]	210274464	210293196	-	67103	upstream
chr1	LNC_000172	XLOC_012368	--	Novel_lncRNA	210360300	210373726	-	ENSSSCT00000005601	ENSSSCG00000005082	PCNXL4	pecanex-like 4 (Drosophila) [Source:HGNC Symbol;Acc:HGNC:20349]	210243302	210276706	+	83593	downstream
chr1	LNC_000173	XLOC_012408	--	Novel_lncRNA	216688461	216693876	-	ENSSSCT00000005636	ENSSSCG00000005113	PPP2R5E	protein phosphatase 2 regulatory subunit B', epsilon [Source:HGNC Symbol;Acc:HGNC:9313]	216638628	216665184	+	23276	downstream
chr1	LNC_000173	XLOC_012408	--	Novel_lncRNA	216688461	216693876	-	ENSSSCT00000032151	ENSSSCG00000026382	-	serine/threonine-protein phosphatase 2A 56 kDa regulatory subunit epsilon isoform [Source:RefSeq peptide;Acc:NP_001230991]	216590125	216628178	-	60282	upstream
chr1	LNC_000173	XLOC_012408	--	Novel_lncRNA	216688461	216693876	-	ENSSSCT00000025810	ENSSSCG00000022804	RHOJ	ras homolog family member J [Source:HGNC Symbol;Acc:HGNC:688]	216775633	216799044	+	81756	upstream
chr1	ALDBSSCT0000000864	ALDBSSCG0000000525	--	Annotated_lncRNA	163409501	163413651	-	ENSSSCT00000025136	ENSSSCG00000023533	--	--	163273808	163328610	-	80890	upstream
chr1	LNC_000171	XLOC_012284	--	Novel_lncRNA	200589525	200589942	-	ENSSSCT00000022247	ENSSSCG00000024414	--	--	200542263	200563638	-	25886	upstream
chr1	LNC_000171	XLOC_012284	--	Novel_lncRNA	200589525	200589942	-	ENSSSCT00000005535	ENSSSCG00000005019	--	--	200501783	200512592	-	76932	upstream
chr1	LNC_000171	XLOC_012284	--	Novel_lncRNA	200589525	200589942	-	ENSSSCT00000005536	ENSSSCG00000005020	--	--	200589507	200695217	+	-418	antisense
chr2	ALDBSSCT0000006055	ALDBSSCG0000003709	--	Annotated_lncRNA	146225357	146226000	+	ENSSSCT00000015665	ENSSSCG00000014338	HSPA9	heat shock protein family A (Hsp70) member 9 [Source:HGNC Symbol;Acc:HGNC:5244]	146229842	146246784	-	3841	downstream
chr2	ALDBSSCT0000006055	ALDBSSCG0000003709	--	Annotated_lncRNA	146225357	146226000	+	ENSSSCT00000015664	ENSSSCG00000014337	ETF1	eukaryotic translation termination factor 1 [Source:HGNC Symbol;Acc:HGNC:3477]	146186428	146219318	-	6038	upstream
chr2	ALDBSSCT0000006055	ALDBSSCG0000003709	--	Annotated_lncRNA	146225357	146226000	+	ENSSSCT00000015660	ENSSSCG00000014336	EGR1	early growth response 1 [Source:HGNC Symbol;Acc:HGNC:3238]	146156065	146159944	+	65412	downstream
chr2	ALDBSSCT0000006055	ALDBSSCG0000003709	--	Annotated_lncRNA	146225357	146226000	+	ENSSSCT00000015663	ENSSSCG00000014336	EGR1	early growth response 1 [Source:HGNC Symbol;Acc:HGNC:3238]	146156357	146160020	+	65336	downstream
chr2	ALDBSSCT0000006055	ALDBSSCG0000003709	--	Annotated_lncRNA	146225357	146226000	+	ENSSSCT00000015662	ENSSSCG00000014335	REEP2	receptor accessory protein 2 [Source:HGNC Symbol;Acc:HGNC:17975]	146132308	146137792	-	87564	upstream
chr2	ALDBSSCT0000006055	ALDBSSCG0000003709	--	Annotated_lncRNA	146225357	146226000	+	ENSSSCT00000029354	ENSSSCG00000028081	--	--	146124809	146127019	+	98337	downstream
chr2	ALDBSSCT0000006050	ALDBSSCG0000003704	--	Annotated_lncRNA	143690799	143695335	+	ENSSSCT00000027552	ENSSSCG00000025818	IL9	interleukin 9 [Source:HGNC Symbol;Acc:HGNC:6029]	143648289	143651957	-	38841	upstream
chr2	ALDBSSCT0000006050	ALDBSSCG0000003704	--	Annotated_lncRNA	143690799	143695335	+	ENSSSCT00000015638	ENSSSCG00000014314	--	--	143696463	143768753	+	1127	upstream
chr2	ALDBSSCT0000006050	ALDBSSCG0000003704	--	Annotated_lncRNA	143690799	143695335	+	ENSSSCT00000015639	ENSSSCG00000014315	LECT2	leukocyte cell-derived chemotaxin 2 [Source:HGNC Symbol;Acc:HGNC:6550]	143773982	143782710	-	78646	downstream
chr2	ALDBSSCT0000006050	ALDBSSCG0000003704	--	Annotated_lncRNA	143690799	143695335	+	ENSSSCT00000029269	ENSSSCG00000014315	LECT2	leukocyte cell-derived chemotaxin 2 [Source:HGNC Symbol;Acc:HGNC:6550]	143774257	143784745	-	78921	downstream
chr2	ALDBSSCT0000006050	ALDBSSCG0000003704	--	Annotated_lncRNA	143690799	143695335	+	ENSSSCT00000015637	ENSSSCG00000014313	--	--	143706715	143709720	-	11379	downstream
chr2	ALDBSSCT0000006050	ALDBSSCG0000003704	--	Annotated_lncRNA	143690799	143695335	+	ENSSSCT00000015635	ENSSSCG00000014311	SLC25A48	solute carrier family 25 member 48 [Source:HGNC Symbol;Acc:HGNC:30451]	143586022	143634935	+	55863	downstream
chr4	ENSSSCT00000035465	ENSSSCG00000006687	ITGA10	Annotated_lncRNA	109065647	109070602	+	ENSSSCT00000032180	ENSSSCG00000006690	NUDT17	nudix hydrolase 17 [Source:HGNC Symbol;Acc:HGNC:26618]	109117272	109120032	-	46669	downstream
chr4	ENSSSCT00000035465	ENSSSCG00000006687	ITGA10	Annotated_lncRNA	109065647	109070602	+	ENSSSCT00000007324	ENSSSCG00000006685	GNRHR2	-	109053018	109057325	-	8321	upstream
chr4	ENSSSCT00000035465	ENSSSCG00000006687	ITGA10	Annotated_lncRNA	109065647	109070602	+	ENSSSCT00000023324	ENSSSCG00000026502	LIX1L	limb and CNS expressed 1 like [Source:HGNC Symbol;Acc:HGNC:28715]	109026832	109047697	+	17949	downstream
chr4	ENSSSCT00000035465	ENSSSCG00000006687	ITGA10	Annotated_lncRNA	109065647	109070602	+	ENSSSCT00000007319	ENSSSCG00000006681	TXNIP	Thioredoxin-interacting protein [Source:UniProtKB/Swiss-Prot;Acc:Q2HY40]	108991306	108995645	+	70001	downstream
chr4	ENSSSCT00000035465	ENSSSCG00000006687	ITGA10	Annotated_lncRNA	109065647	109070602	+	ENSSSCT00000023288	ENSSSCG00000006690	NUDT17	nudix hydrolase 17 [Source:HGNC Symbol;Acc:HGNC:26618]	109117400	109120032	-	46797	downstream
chr4	ENSSSCT00000035465	ENSSSCG00000006687	ITGA10	Annotated_lncRNA	109065647	109070602	+	ENSSSCT00000007330	ENSSSCG00000006691	POLR3C	polymerase (RNA) III (DNA directed) polypeptide C (62kD) [Source:HGNC Symbol;Acc:HGNC:30076]	109123026	109133240	-	52423	downstream
chr4	ENSSSCT00000035465	ENSSSCG00000006687	ITGA10	Annotated_lncRNA	109065647	109070602	+	ENSSSCT00000023878	ENSSSCG00000025632	--	--	109134738	109211770	+	64135	upstream
chr4	ENSSSCT00000035465	ENSSSCG00000006687	ITGA10	Annotated_lncRNA	109065647	109070602	+	ENSSSCT00000007329	ENSSSCG00000006690	NUDT17	nudix hydrolase 17 [Source:HGNC Symbol;Acc:HGNC:26618]	109114418	109120015	-	43815	downstream
chr4	ENSSSCT00000035465	ENSSSCG00000006687	ITGA10	Annotated_lncRNA	109065647	109070602	+	ENSSSCT00000007328	ENSSSCG00000006689	PIAS3	protein inhibitor of activated STAT 3 [Source:HGNC Symbol;Acc:HGNC:16861]	109107868	109118263	+	37265	upstream
chr4	ENSSSCT00000035465	ENSSSCG00000006687	ITGA10	Annotated_lncRNA	109065647	109070602	+	ENSSSCT00000007327	ENSSSCG00000006688	ANKRD35	ankyrin repeat domain 35 [Source:HGNC Symbol;Acc:HGNC:26323]	109085351	109102969	+	14748	upstream
chr4	ENSSSCT00000035465	ENSSSCG00000006687	ITGA10	Annotated_lncRNA	109065647	109070602	+	ENSSSCT00000007325	ENSSSCG00000006686	PEX11B	peroxisomal biogenesis factor 11 beta [Source:HGNC Symbol;Acc:HGNC:8853]	109057964	109064028	+	1618	downstream
chr4	ENSSSCT00000035465	ENSSSCG00000006687	ITGA10	Annotated_lncRNA	109065647	109070602	+	ENSSSCT00000007320	ENSSSCG00000006682	POLR3GL	polymerase (RNA) III (DNA directed) polypeptide G (32kD)-like [Source:HGNC Symbol;Acc:HGNC:28466]	109005730	109020322	-	45324	upstream
chr4	ENSSSCT00000035465	ENSSSCG00000006687	ITGA10	Annotated_lncRNA	109065647	109070602	+	ENSSSCT00000007323	ENSSSCG00000006685	GNRHR2	-	109053018	109057358	-	8288	upstream
chr4	ENSSSCT00000035465	ENSSSCG00000006687	ITGA10	Annotated_lncRNA	109065647	109070602	+	ENSSSCT00000007318	ENSSSCG00000006680	HFE2	hemochromatosis type 2 (juvenile) [Source:HGNC Symbol;Acc:HGNC:4887]	108972376	108974564	+	91082	downstream
chr4	ENSSSCT00000035465	ENSSSCG00000006687	ITGA10	Annotated_lncRNA	109065647	109070602	+	ENSSSCT00000022923	ENSSSCG00000028509	RBM8A	RNA binding motif protein 8A [Source:HGNC Symbol;Acc:HGNC:9905]	109050497	109054806	+	10840	downstream
chr15	ENSSSCT00000017310	ENSSSCG00000015897	IFIH1	Annotated_lncRNA	76423089	76477401	-	ENSSSCT00000036390	ENSSSCG00000015896	FAP	fibroblast activation protein alpha [Source:HGNC Symbol;Acc:HGNC:3590]	76323042	76394187	-	28901	upstream
chr15	ENSSSCT00000017310	ENSSSCG00000015897	IFIH1	Annotated_lncRNA	76423089	76477401	-	ENSSSCT00000017308	ENSSSCG00000015896	FAP	fibroblast activation protein alpha [Source:HGNC Symbol;Acc:HGNC:3590]	76322712	76394118	-	28970	upstream
chr15	ENSSSCT00000017310	ENSSSCG00000015897	IFIH1	Annotated_lncRNA	76423089	76477401	-	ENSSSCT00000035580	ENSSSCG00000027472	GCA	-	76511222	76545119	+	33820	upstream
chr15	ENSSSCT00000017310	ENSSSCG00000015897	IFIH1	Annotated_lncRNA	76423089	76477401	-	ENSSSCT00000031337	ENSSSCG00000027472	GCA	-	76510742	76544906	+	33340	upstream
chr13	ALDBSSCT0000002829	ALDBSSCG0000001723	--	Annotated_lncRNA	142784611	142787041	+	ENSSSCT00000012949	ENSSSCG00000011837	--	--	142726305	142751740	+	32870	downstream
chr13	ALDBSSCT0000002829	ALDBSSCG0000001723	--	Annotated_lncRNA	142784611	142787041	+	ENSSSCT00000036141	ENSSSCG00000011837	--	--	142740491	142751987	+	32623	downstream
chr13	ALDBSSCT0000002829	ALDBSSCG0000001723	--	Annotated_lncRNA	142784611	142787041	+	ENSSSCT00000012953	ENSSSCG00000011841	SENP5	SUMO1/sentrin specific peptidase 5 [Source:HGNC Symbol;Acc:HGNC:28407]	142805249	142869979	+	18207	upstream
chr13	ALDBSSCT0000002829	ALDBSSCG0000001723	--	Annotated_lncRNA	142784611	142787041	+	ENSSSCT00000035987	ENSSSCG00000030778	MFI2	-	142726244	142739401	+	45209	downstream
chr13	ALDBSSCT0000002829	ALDBSSCG0000001723	--	Annotated_lncRNA	142784611	142787041	+	ENSSSCT00000012954	ENSSSCG00000011842	--	--	142776353	142777381	+	7229	downstream
chr13	ALDBSSCT0000002829	ALDBSSCG0000001723	--	Annotated_lncRNA	142784611	142787041	+	ENSSSCT00000025717	ENSSSCG00000029291	--	--	142885149	142906042	-	98107	downstream
chr13	ALDBSSCT0000002829	ALDBSSCG0000001723	--	Annotated_lncRNA	142784611	142787041	+	ENSSSCT00000024784	ENSSSCG00000027323	NCBP2	-	142871463	142880239	-	84421	downstream
chr13	ALDBSSCT0000002829	ALDBSSCG0000001723	--	Annotated_lncRNA	142784611	142787041	+	ENSSSCT00000032660	ENSSSCG00000030778	MFI2	-	142728263	142736576	+	48034	downstream
chr11	ALDBSSCT0000001711	ALDBSSCG0000001032	--	Annotated_lncRNA	18208881	18210956	+	ENSSSCT00000010289	ENSSSCG00000009390	SPRYD7	SPRY domain containing 7 [Source:HGNC Symbol;Acc:HGNC:14297]	18186983	18208062	+	818	downstream
chr11	ALDBSSCT0000001711	ALDBSSCG0000001032	--	Annotated_lncRNA	18208881	18210956	+	ENSSSCT00000030501	ENSSSCG00000024125	--	--	18284859	18292470	+	73902	upstream
chr11	ALDBSSCT0000001711	ALDBSSCG0000001032	--	Annotated_lncRNA	18208881	18210956	+	ENSSSCT00000010292	ENSSSCG00000009393	EBPL	emopamil binding protein-like [Source:HGNC Symbol;Acc:HGNC:18061]	18297590	18329908	+	86633	upstream
chr11	ALDBSSCT0000001711	ALDBSSCG0000001032	--	Annotated_lncRNA	18208881	18210956	+	ENSSSCT00000010290	ENSSSCG00000009391	-	importin subunit alpha-3 [Source:RefSeq peptide;Acc:NP_001177159]	18085027	18109816	-	99064	upstream
chr4	LNC_000524	XLOC_045276	--	Novel_lncRNA	80766364	80794361	-	ENSSSCT00000006832	ENSSSCG00000006235	TOX	thymocyte selection associated high mobility group box [Source:HGNC Symbol;Acc:HGNC:18988]	80758283	80906755	+	-27998	antisense
chr4	LNC_000524	XLOC_045276	--	Novel_lncRNA	80766364	80794361	-	ENSSSCT00000031500	ENSSSCG00000006235	TOX	thymocyte selection associated high mobility group box [Source:HGNC Symbol;Acc:HGNC:18988]	80857475	80906755	+	63113	upstream
chr10	ALDBSSCT0000001248	ALDBSSCG0000000756	--	Annotated_lncRNA	47712356	47727977	+	ENSSSCT00000028108	ENSSSCG00000027759	--	--	47679563	47680817	-	31538	upstream
chr10	ALDBSSCT0000001248	ALDBSSCG0000000756	--	Annotated_lncRNA	47712356	47727977	+	ENSSSCT00000028808	ENSSSCG00000027616	--	--	47620152	47621904	+	90451	downstream
chr10	ALDBSSCT0000001248	ALDBSSCG0000000756	--	Annotated_lncRNA	47712356	47727977	+	ENSSSCT00000030761	ENSSSCG00000023200	--	--	47710052	47710749	+	1606	downstream
chr10	ALDBSSCT0000001248	ALDBSSCG0000000756	--	Annotated_lncRNA	47712356	47727977	+	ENSSSCT00000028227	ENSSSCG00000027616	--	--	47620495	47622126	+	90229	downstream
chr10	ALDBSSCT0000001248	ALDBSSCG0000000756	--	Annotated_lncRNA	47712356	47727977	+	ENSSSCT00000012072	ENSSSCG00000011030	CUBN	cubilin [Source:HGNC Symbol;Acc:HGNC:2548]	47746354	47995946	-	18376	downstream
chr13	ALDBSSCT0000002824	ALDBSSCG0000001718	--	Annotated_lncRNA	138649081	138674419	+	ENSSSCT00000023418	ENSSSCG00000029252	FGF12	fibroblast growth factor 12 [Source:HGNC Symbol;Acc:HGNC:3668]	138749975	138983559	-	75555	downstream
chr4	ALDBSSCT0000007942	ALDBSSCG0000004813	--	Annotated_lncRNA	41943465	41961259	-	ENSSSCT00000006674	ENSSSCG00000006083	LAPTM4B	lysosomal protein transmembrane 4 beta [Source:HGNC Symbol;Acc:HGNC:13646]	41977263	42059922	-	16003	downstream
GL892260.2	LNC_000002	XLOC_000037	--	Novel_lncRNA	48420	52230	-	ENSSSCT00000029420	ENSSSCG00000028858	FAM83C	family with sequence similarity 83 member C [Source:HGNC Symbol;Acc:HGNC:16121]	25346	30771	-	17648	upstream
GL892260.2	LNC_000002	XLOC_000037	--	Novel_lncRNA	48420	52230	-	ENSSSCT00000023513	ENSSSCG00000022864	--	--	17432	22665	-	25754	upstream
GL892260.2	LNC_000002	XLOC_000037	--	Novel_lncRNA	48420	52230	-	ENSSSCT00000029827	ENSSSCG00000021953	--	--	35684	46807	-	1612	upstream
GL892260.2	LNC_000002	XLOC_000037	--	Novel_lncRNA	48420	52230	-	ENSSSCT00000024685	ENSSSCG00000028858	FAM83C	family with sequence similarity 83 member C [Source:HGNC Symbol;Acc:HGNC:16121]	25346	30729	-	17690	upstream
GL892260.2	LNC_000001	XLOC_000037	--	Novel_lncRNA	48227	50026	-	ENSSSCT00000029420	ENSSSCG00000028858	FAM83C	family with sequence similarity 83 member C [Source:HGNC Symbol;Acc:HGNC:16121]	25346	30771	-	17455	upstream
GL892260.2	LNC_000001	XLOC_000037	--	Novel_lncRNA	48227	50026	-	ENSSSCT00000023513	ENSSSCG00000022864	--	--	17432	22665	-	25561	upstream
GL892260.2	LNC_000001	XLOC_000037	--	Novel_lncRNA	48227	50026	-	ENSSSCT00000029827	ENSSSCG00000021953	--	--	35684	46807	-	1419	upstream
GL892260.2	LNC_000001	XLOC_000037	--	Novel_lncRNA	48227	50026	-	ENSSSCT00000024685	ENSSSCG00000028858	FAM83C	family with sequence similarity 83 member C [Source:HGNC Symbol;Acc:HGNC:16121]	25346	30729	-	17497	upstream
GL892447.1	LNC_000006	XLOC_000344	--	Novel_lncRNA	45555	46263	-	ENSSSCT00000030370	ENSSSCG00000021371	--	--	33602	45324	-	230	upstream
GL892447.1	LNC_000007	XLOC_000344	--	Novel_lncRNA	45555	46284	-	ENSSSCT00000030370	ENSSSCG00000021371	--	--	33602	45324	-	230	upstream
GL892447.1	LNC_000004	XLOC_000342	--	Novel_lncRNA	26178	29841	-	ENSSSCT00000030370	ENSSSCG00000021371	--	--	33602	45324	-	3760	downstream
GL892447.1	LNC_000005	XLOC_000342	--	Novel_lncRNA	26178	29940	-	ENSSSCT00000030370	ENSSSCG00000021371	--	--	33602	45324	-	3661	downstream
GL892477.1	LNC_000008	XLOC_000361	--	Novel_lncRNA	95200	113536	+	ENSSSCT00000026634	ENSSSCG00000021513	HYLS1	hydrolethalus syndrome 1 [Source:HGNC Symbol;Acc:HGNC:26558]	81700	85418	-	9781	upstream
GL892477.1	LNC_000008	XLOC_000361	--	Novel_lncRNA	95200	113536	+	ENSSSCT00000025358	ENSSSCG00000022504	CDON	cell adhesion associated, oncogene regulated [Source:HGNC Symbol;Acc:HGNC:17104]	3382	26367	+	68832	downstream
GL892477.1	LNC_000008	XLOC_000361	--	Novel_lncRNA	95200	113536	+	ENSSSCT00000012145	ENSSSCG00000011098	--	--	63104	76472	-	18727	upstream
GL892477.1	LNC_000008	XLOC_000361	--	Novel_lncRNA	95200	113536	+	ENSSSCT00000012144	ENSSSCG00000011097	--	--	78415	88255	+	6944	downstream
GL892477.1	LNC_000009	XLOC_000361	--	Novel_lncRNA	95216	97927	+	ENSSSCT00000026634	ENSSSCG00000021513	HYLS1	hydrolethalus syndrome 1 [Source:HGNC Symbol;Acc:HGNC:26558]	81700	85418	-	9797	upstream
GL892477.1	LNC_000009	XLOC_000361	--	Novel_lncRNA	95216	97927	+	ENSSSCT00000025358	ENSSSCG00000022504	CDON	cell adhesion associated, oncogene regulated [Source:HGNC Symbol;Acc:HGNC:17104]	3382	26367	+	68848	downstream
GL892477.1	LNC_000009	XLOC_000361	--	Novel_lncRNA	95216	97927	+	ENSSSCT00000012145	ENSSSCG00000011098	--	--	63104	76472	-	18743	upstream
GL892477.1	LNC_000009	XLOC_000361	--	Novel_lncRNA	95216	97927	+	ENSSSCT00000012144	ENSSSCG00000011097	--	--	78415	88255	+	6960	downstream
chr6	ALDBSSCT0000009358	ALDBSSCG0000005711	--	Annotated_lncRNA	56802933	56804760	-	ENSSSCT00000029899	ENSSSCG00000029696	--	--	56900114	56909192	+	95353	upstream
chr6	ALDBSSCT0000009358	ALDBSSCG0000005711	--	Annotated_lncRNA	56802933	56804760	-	ENSSSCT00000004408	ENSSSCG00000003986	--	--	56847038	56880455	-	42277	downstream
chr6	ALDBSSCT0000009358	ALDBSSCG0000005711	--	Annotated_lncRNA	56802933	56804760	-	ENSSSCT00000004407	ENSSSCG00000003985	--	--	56812059	56829002	-	7298	downstream
chr6	ALDBSSCT0000009358	ALDBSSCG0000005711	--	Annotated_lncRNA	56802933	56804760	-	ENSSSCT00000004406	ENSSSCG00000003984	ZNF134	zinc finger protein 134 [Source:HGNC Symbol;Acc:HGNC:12918]	56718236	56719477	+	83455	downstream
chr12	ALDBSSCT0000002183	ALDBSSCG0000001305	--	Annotated_lncRNA	14864324	14869427	+	ENSSSCT00000018811	ENSSSCG00000017279	ERN1	endoplasmic reticulum to nucleus signaling 1 [Source:HGNC Symbol;Acc:HGNC:3449]	14918934	14955053	+	49506	upstream
chr12	ALDBSSCT0000002183	ALDBSSCG0000001305	--	Annotated_lncRNA	14864324	14869427	+	ENSSSCT00000018810	ENSSSCG00000017278	TEX2	testis expressed 2 [Source:HGNC Symbol;Acc:HGNC:30884]	14801043	14859912	+	4411	downstream
chr12	ALDBSSCT0000002183	ALDBSSCG0000001305	--	Annotated_lncRNA	14864324	14869427	+	ENSSSCT00000018812	ENSSSCG00000017280	ICAM2	intercellular adhesion molecule 2 [Source:HGNC Symbol;Acc:HGNC:5345]	14963914	14982966	+	94486	upstream
chr12	ALDBSSCT0000002183	ALDBSSCG0000001305	--	Annotated_lncRNA	14864324	14869427	+	ENSSSCT00000033230	ENSSSCG00000017280	ICAM2	intercellular adhesion molecule 2 [Source:HGNC Symbol;Acc:HGNC:5345]	14969128	14980150	+	99700	upstream
chr12	ALDBSSCT0000002183	ALDBSSCG0000001305	--	Annotated_lncRNA	14864324	14869427	+	ENSSSCT00000034499	ENSSSCG00000017280	ICAM2	intercellular adhesion molecule 2 [Source:HGNC Symbol;Acc:HGNC:5345]	14968607	14981728	+	99179	upstream
chr6	ALDBSSCT0000009355	ALDBSSCG0000005708	--	Annotated_lncRNA	56227120	56231887	-	ENSSSCT00000031892	ENSSSCG00000026141	ZNF71	zinc finger protein 71 [Source:HGNC Symbol;Acc:HGNC:13141]	56148963	56159821	-	67298	upstream
chr6	ALDBSSCT0000009355	ALDBSSCG0000005708	--	Annotated_lncRNA	56227120	56231887	-	ENSSSCT00000024157	ENSSSCG00000022529	--	--	56261938	56262900	+	30050	upstream
chr6	ALDBSSCT0000009355	ALDBSSCG0000005708	--	Annotated_lncRNA	56227120	56231887	-	ENSSSCT00000003263	ENSSSCG00000002941	--	--	56186202	56191886	-	35233	upstream
chr6	ALDBSSCT0000009355	ALDBSSCG0000005708	--	Annotated_lncRNA	56227120	56231887	-	ENSSSCT00000025754	ENSSSCG00000021121	--	--	56285232	56286444	+	53344	upstream
chr6	ALDBSSCT0000009355	ALDBSSCG0000005708	--	Annotated_lncRNA	56227120	56231887	-	ENSSSCT00000030263	ENSSSCG00000028467	--	--	56255035	56256003	+	23147	upstream
chr6	ALDBSSCT0000009355	ALDBSSCG0000005708	--	Annotated_lncRNA	56227120	56231887	-	ENSSSCT00000024914	ENSSSCG00000023275	--	--	56275663	56276601	+	43775	upstream
chr6	ALDBSSCT0000009355	ALDBSSCG0000005708	--	Annotated_lncRNA	56227120	56231887	-	ENSSSCT00000027154	ENSSSCG00000029072	--	--	56268729	56269723	+	36841	upstream
chr6	ALDBSSCT0000009355	ALDBSSCG0000005708	--	Annotated_lncRNA	56227120	56231887	-	ENSSSCT00000026112	ENSSSCG00000024450	--	--	56292033	56292971	-	60145	downstream
chr6	ALDBSSCT0000009355	ALDBSSCG0000005708	--	Annotated_lncRNA	56227120	56231887	-	ENSSSCT00000025504	ENSSSCG00000027774	--	--	56197893	56218096	-	9023	upstream
chr6	ALDBSSCT0000009353	ALDBSSCG0000005707	--	Annotated_lncRNA	56163372	56165498	-	ENSSSCT00000024157	ENSSSCG00000022529	--	--	56261938	56262900	+	96439	upstream
chr6	ALDBSSCT0000009353	ALDBSSCG0000005707	--	Annotated_lncRNA	56163372	56165498	-	ENSSSCT00000003263	ENSSSCG00000002941	--	--	56186202	56191886	-	20703	downstream
chr6	ALDBSSCT0000009353	ALDBSSCG0000005707	--	Annotated_lncRNA	56163372	56165498	-	ENSSSCT00000031892	ENSSSCG00000026141	ZNF71	zinc finger protein 71 [Source:HGNC Symbol;Acc:HGNC:13141]	56148963	56159821	-	3550	upstream
chr6	ALDBSSCT0000009353	ALDBSSCG0000005707	--	Annotated_lncRNA	56163372	56165498	-	ENSSSCT00000030263	ENSSSCG00000028467	--	--	56255035	56256003	+	89536	upstream
chr6	ALDBSSCT0000009353	ALDBSSCG0000005707	--	Annotated_lncRNA	56163372	56165498	-	ENSSSCT00000025504	ENSSSCG00000027774	--	--	56197893	56218096	-	32394	downstream
chr6	ALDBSSCT0000009351	ALDBSSCG0000005705	--	Annotated_lncRNA	54671990	54677914	-	ENSSSCT00000030389	ENSSSCG00000027059	--	--	54619255	54621982	+	50007	downstream
chr6	ALDBSSCT0000009351	ALDBSSCG0000005705	--	Annotated_lncRNA	54671990	54677914	-	ENSSSCT00000026499	ENSSSCG00000029024	--	--	54760588	54761506	+	82673	upstream
chr6	ALDBSSCT0000009351	ALDBSSCG0000005705	--	Annotated_lncRNA	54671990	54677914	-	ENSSSCT00000022447	ENSSSCG00000029007	--	--	54614150	54617236	-	54753	upstream
chr6	ALDBSSCT0000009351	ALDBSSCG0000005705	--	Annotated_lncRNA	54671990	54677914	-	ENSSSCT00000023944	ENSSSCG00000022319	ZNF784	zinc finger protein 784 [Source:HGNC Symbol;Acc:HGNC:33111]	54591824	54592639	+	79350	downstream
chr6	ALDBSSCT0000009351	ALDBSSCG0000005705	--	Annotated_lncRNA	54671990	54677914	-	ENSSSCT00000023868	ENSSSCG00000023137	--	--	54700537	54735350	+	22622	upstream
chr6	ALDBSSCT0000009351	ALDBSSCG0000005705	--	Annotated_lncRNA	54671990	54677914	-	ENSSSCT00000029278	ENSSSCG00000024247	SBK2	SH3 domain binding kinase family member 2 [Source:HGNC Symbol;Acc:HGNC:34416]	54633361	54636989	-	35000	upstream
chr6	ALDBSSCT0000009350	ALDBSSCG0000005704	--	Annotated_lncRNA	54492727	54493920	-	ENSSSCT00000031117	ENSSSCG00000025343	ZNF628	zinc finger protein 628 [Source:HGNC Symbol;Acc:HGNC:28054]	54509488	54512750	-	15567	downstream
chr6	ALDBSSCT0000009350	ALDBSSCG0000005704	--	Annotated_lncRNA	54492727	54493920	-	ENSSSCT00000023731	ENSSSCG00000024661	ZNF524	zinc finger protein 524 [Source:HGNC Symbol;Acc:HGNC:28322]	54542963	54546070	+	49042	upstream
chr6	ALDBSSCT0000009350	ALDBSSCG0000005704	--	Annotated_lncRNA	54492727	54493920	-	ENSSSCT00000003666	ENSSSCG00000003302	TMEM86B	transmembrane protein 86B [Source:HGNC Symbol;Acc:HGNC:28448]	54419747	54421705	+	71021	downstream
chr6	ALDBSSCT0000009350	ALDBSSCG0000005704	--	Annotated_lncRNA	54492727	54493920	-	ENSSSCT00000003665	ENSSSCG00000003301	PPP6R1	protein phosphatase 6 regulatory subunit 1 [Source:HGNC Symbol;Acc:HGNC:29195]	54395348	54418036	+	74690	downstream
chr6	ALDBSSCT0000009350	ALDBSSCG0000005704	--	Annotated_lncRNA	54492727	54493920	-	ENSSSCT00000026906	ENSSSCG00000022936	FIZ1	FLT3-interacting zinc finger 1 [Source:HGNC Symbol;Acc:HGNC:25917]	54505638	54508830	-	11717	downstream
chr6	ALDBSSCT0000009350	ALDBSSCG0000005704	--	Annotated_lncRNA	54492727	54493920	-	ENSSSCT00000003653	ENSSSCG00000003289	ISOC2	isochorismatase domain containing 2 [Source:HGNC Symbol;Acc:HGNC:26278]	54537560	54542884	+	43639	upstream
chr6	ALDBSSCT0000009350	ALDBSSCG0000005704	--	Annotated_lncRNA	54492727	54493920	-	ENSSSCT00000003652	ENSSSCG00000003288	HSPBP1	HSPA (heat shock 70kDa) binding protein, cytoplasmic cochaperone 1 [Source:HGNC Symbol;Acc:HGNC:24989]	54381184	54393103	+	99623	downstream
chr6	ALDBSSCT0000009350	ALDBSSCG0000005704	--	Annotated_lncRNA	54492727	54493920	-	ENSSSCT00000023944	ENSSSCG00000022319	ZNF784	zinc finger protein 784 [Source:HGNC Symbol;Acc:HGNC:33111]	54591824	54592639	+	97903	upstream
chr1	ALDBSSCT0000000910	ALDBSSCG0000000556	--	Annotated_lncRNA	204871942	204878724	-	ENSSSCT00000005572	ENSSSCG00000005055	LGALS3	lectin, galactoside-binding, soluble, 3 [Source:HGNC Symbol;Acc:HGNC:6563]	204956631	204974098	+	77906	upstream
chr1	ALDBSSCT0000000910	ALDBSSCG0000000556	--	Annotated_lncRNA	204871942	204878724	-	ENSSSCT00000027382	ENSSSCG00000005052	WDHD1	WD repeat and HMG-box DNA binding protein 1 [Source:HGNC Symbol;Acc:HGNC:23170]	204780489	204841492	-	30449	upstream
chr1	ALDBSSCT0000000910	ALDBSSCG0000000556	--	Annotated_lncRNA	204871942	204878724	-	ENSSSCT00000005569	ENSSSCG00000005052	WDHD1	WD repeat and HMG-box DNA binding protein 1 [Source:HGNC Symbol;Acc:HGNC:23170]	204780489	204841492	-	30449	upstream
chr1	ALDBSSCT0000000910	ALDBSSCG0000000556	--	Annotated_lncRNA	204871942	204878724	-	ENSSSCT00000005570	ENSSSCG00000005053	SOCS4	suppressor of cytokine signaling 4 [Source:HGNC Symbol;Acc:HGNC:19392]	204886220	204901845	+	7495	upstream
chr1	ALDBSSCT0000000910	ALDBSSCG0000000556	--	Annotated_lncRNA	204871942	204878724	-	ENSSSCT00000005571	ENSSSCG00000005054	MAPK1IP1L	mitogen-activated protein kinase 1 interacting protein 1-like [Source:HGNC Symbol;Acc:HGNC:19840]	204908530	204920066	+	29805	upstream
chr1	ALDBSSCT0000000910	ALDBSSCG0000000556	--	Annotated_lncRNA	204871942	204878724	-	ENSSSCT00000032888	ENSSSCG00000005055	LGALS3	lectin, galactoside-binding, soluble, 3 [Source:HGNC Symbol;Acc:HGNC:6563]	204964081	204974124	+	85356	upstream
chr1	ALDBSSCT0000000911	ALDBSSCG0000000557	--	Annotated_lncRNA	205104993	205124296	-	ENSSSCT00000005573	ENSSSCG00000005056	DLGAP5	discs, large (Drosophila) homolog-associated protein 5 [Source:HGNC Symbol;Acc:HGNC:16864]	204978764	205027971	-	77021	upstream
chr1	ALDBSSCT0000000445	ALDBSSCG0000000268	--	Annotated_lncRNA	241169650	241171115	+	ENSSSCT00000026205	ENSSSCG00000023898	--	--	241128043	241129201	-	40448	upstream
chr1	ALDBSSCT0000000445	ALDBSSCG0000000268	--	Annotated_lncRNA	241169650	241171115	+	ENSSSCT00000025343	ENSSSCG00000029479	--	--	241244000	241247724	+	72884	upstream
chr1	ALDBSSCT0000000445	ALDBSSCG0000000268	--	Annotated_lncRNA	241169650	241171115	+	ENSSSCT00000005733	ENSSSCG00000005201	UHRF2	ubiquitin-like with PHD and ring finger domains 2, E3 ubiquitin protein ligase [Source:HGNC Symbol;Acc:HGNC:12557]	241253104	241363238	-	81988	downstream
chr1	ALDBSSCT0000000445	ALDBSSCG0000000268	--	Annotated_lncRNA	241169650	241171115	+	ENSSSCT00000005731	ENSSSCG00000005199	--	--	241060724	241084165	+	85484	downstream
chr1	ALDBSSCT0000000914	ALDBSSCG0000000560	--	Annotated_lncRNA	206904042	206908648	-	ENSSSCT00000005583	ENSSSCG00000005066	EXOC5	exocyst complex component 5 [Source:HGNC Symbol;Acc:HGNC:10696]	206960084	206993410	-	51435	downstream
chr1	ALDBSSCT0000000914	ALDBSSCG0000000560	--	Annotated_lncRNA	206904042	206908648	-	ENSSSCT00000005582	ENSSSCG00000005065	AP5M1	adaptor related protein complex 5, mu 1 subunit [Source:HGNC Symbol;Acc:HGNC:20192]	207004004	207027579	+	95355	upstream
chr1	ALDBSSCT0000000915	ALDBSSCG0000000561	--	Annotated_lncRNA	207097049	207102386	-	ENSSSCT00000028888	ENSSSCG00000005067	C14orf105	chromosome 14 open reading frame 105 [Source:HGNC Symbol;Acc:HGNC:20189]	207166637	207202262	-	64250	downstream
chr1	ALDBSSCT0000000915	ALDBSSCG0000000561	--	Annotated_lncRNA	207097049	207102386	-	ENSSSCT00000005581	ENSSSCG00000005064	NAA30	N(alpha)-acetyltransferase 30, NatC catalytic subunit [Source:HGNC Symbol;Acc:HGNC:19844]	207103162	207112320	+	775	upstream
chr1	ALDBSSCT0000000915	ALDBSSCG0000000561	--	Annotated_lncRNA	207097049	207102386	-	ENSSSCT00000005584	ENSSSCG00000005067	C14orf105	chromosome 14 open reading frame 105 [Source:HGNC Symbol;Acc:HGNC:20189]	207166637	207202262	-	64250	downstream
chr1	ALDBSSCT0000000915	ALDBSSCG0000000561	--	Annotated_lncRNA	207097049	207102386	-	ENSSSCT00000005582	ENSSSCG00000005065	AP5M1	adaptor related protein complex 5, mu 1 subunit [Source:HGNC Symbol;Acc:HGNC:20192]	207004004	207027579	+	69469	downstream
chr1	ALDBSSCT0000000448	ALDBSSCG0000000271	--	Annotated_lncRNA	245181701	245200074	+	ENSSSCT00000005764	ENSSSCG00000005230	--	--	245167561	245169333	+	12367	downstream
chr1	ALDBSSCT0000000449	ALDBSSCG0000000271	--	Annotated_lncRNA	245181817	245237825	+	ENSSSCT00000005764	ENSSSCG00000005230	--	--	245167561	245169333	+	12483	downstream
chr7	ENSSSCT00000032859	ENSSSCG00000030767	TMP-SLA-5	Annotated_lncRNA	24721026	24724165	-	ENSSSCT00000001341	ENSSSCG00000001233	TRIM26	tripartite motif containing 26 [Source:HGNC Symbol;Acc:HGNC:12962]	24795834	24820308	+	71668	upstream
chr7	ENSSSCT00000032859	ENSSSCG00000030767	TMP-SLA-5	Annotated_lncRNA	24721026	24724165	-	ENSSSCT00000036524	ENSSSCG00000001233	TRIM26	tripartite motif containing 26 [Source:HGNC Symbol;Acc:HGNC:12962]	24808398	24818322	+	84232	upstream
chr7	ENSSSCT00000032859	ENSSSCG00000030767	TMP-SLA-5	Annotated_lncRNA	24721026	24724165	-	ENSSSCT00000001334	ENSSSCG00000001231	SLA-1	-	24748105	24751642	-	23939	downstream
chr7	ENSSSCT00000032859	ENSSSCG00000030767	TMP-SLA-5	Annotated_lncRNA	24721026	24724165	-	ENSSSCT00000001330	ENSSSCG00000001229	TMP-CH242-74M17.2	-	24683605	24687174	-	33851	upstream
chr7	ENSSSCT00000032859	ENSSSCG00000030767	TMP-SLA-5	Annotated_lncRNA	24721026	24724165	-	ENSSSCT00000036412	ENSSSCG00000001231	SLA-1	-	24748105	24751627	-	23939	downstream
chr7	ENSSSCT00000032859	ENSSSCG00000030767	TMP-SLA-5	Annotated_lncRNA	24721026	24724165	-	ENSSSCT00000001329	ENSSSCG00000001229	TMP-CH242-74M17.2	-	24683607	24687412	-	33613	upstream
chr7	ENSSSCT00000032859	ENSSSCG00000030767	TMP-SLA-5	Annotated_lncRNA	24721026	24724165	-	ENSSSCT00000001339	ENSSSCG00000001232	CH242-196B23.2	-	24770594	24781751	-	46428	downstream
chr8	ALDBSSCT0000010520	ALDBSSCG0000006381	--	Annotated_lncRNA	77564461	77573255	+	ENSSSCT00000009847	ENSSSCG00000008990	MRPL1	mitochondrial ribosomal protein L1 [Source:HGNC Symbol;Acc:HGNC:14275]	77608624	77656919	-	35368	downstream
chr8	ALDBSSCT0000010521	ALDBSSCG0000006381	--	Annotated_lncRNA	77564754	77573255	+	ENSSSCT00000009847	ENSSSCG00000008990	MRPL1	mitochondrial ribosomal protein L1 [Source:HGNC Symbol;Acc:HGNC:14275]	77608624	77656919	-	35368	downstream
chr8	ALDBSSCT0000010526	ALDBSSCG0000006386	--	Annotated_lncRNA	81084317	81088640	+	ENSSSCT00000009873	ENSSSCG00000009014	--	--	81154151	81221121	+	65510	upstream
chr7	ALDBSSCT0000010255	ALDBSSCG0000006234	--	Annotated_lncRNA	92004978	92018623	-	ENSSSCT00000025402	ENSSSCG00000002266	CHD2	chromodomain helicase DNA binding protein 2 [Source:HGNC Symbol;Acc:HGNC:1917]	91884281	92002591	-	2386	upstream
chr7	ALDBSSCT0000010255	ALDBSSCG0000006234	--	Annotated_lncRNA	92004978	92018623	-	ENSSSCT00000027293	ENSSSCG00000002266	CHD2	chromodomain helicase DNA binding protein 2 [Source:HGNC Symbol;Acc:HGNC:1917]	91906024	92002591	-	2386	upstream
chr7	ALDBSSCT0000010255	ALDBSSCG0000006234	--	Annotated_lncRNA	92004978	92018623	-	ENSSSCT00000002524	ENSSSCG00000002266	CHD2	chromodomain helicase DNA binding protein 2 [Source:HGNC Symbol;Acc:HGNC:1917]	91877498	92002591	-	2386	upstream
chr15	ALDBSSCT0000004160	ALDBSSCG0000002511	--	Annotated_lncRNA	34935634	34937734	+	ENSSSCT00000024092	ENSSSCG00000027791	--	--	34740914	34928241	+	7392	downstream
chr15	ALDBSSCT0000004160	ALDBSSCG0000002511	--	Annotated_lncRNA	34935634	34937734	+	ENSSSCT00000033491	ENSSSCG00000015732	TFCP2L1	transcription factor CP2-like 1 [Source:HGNC Symbol;Acc:HGNC:17925]	35006062	35065807	+	68327	upstream
chr15	ALDBSSCT0000004160	ALDBSSCG0000002511	--	Annotated_lncRNA	34935634	34937734	+	ENSSSCT00000017132	ENSSSCG00000015732	TFCP2L1	transcription factor CP2-like 1 [Source:HGNC Symbol;Acc:HGNC:17925]	35005974	35064266	+	68239	upstream
chr15	ALDBSSCT0000004160	ALDBSSCG0000002511	--	Annotated_lncRNA	34935634	34937734	+	ENSSSCT00000017131	ENSSSCG00000015731	--	--	34947026	34976543	+	9291	upstream
chr15	ALDBSSCT0000004160	ALDBSSCG0000002511	--	Annotated_lncRNA	34935634	34937734	+	ENSSSCT00000033811	ENSSSCG00000015732	TFCP2L1	transcription factor CP2-like 1 [Source:HGNC Symbol;Acc:HGNC:17925]	35006062	35065807	+	68327	upstream
chr15	ALDBSSCT0000004160	ALDBSSCG0000002511	--	Annotated_lncRNA	34935634	34937734	+	ENSSSCT00000033192	ENSSSCG00000015732	TFCP2L1	transcription factor CP2-like 1 [Source:HGNC Symbol;Acc:HGNC:17925]	35006062	35065807	+	68327	upstream
chr10	ALDBSSCT0000001404	ALDBSSCG0000000854	--	Annotated_lncRNA	13117133	13422754	-	ENSSSCT00000011852	ENSSSCG00000010834	MIA3	melanoma inhibitory activity family member 3 [Source:HGNC Symbol;Acc:HGNC:24008]	13487025	13583457	+	64270	upstream
chr10	ALDBSSCT0000001404	ALDBSSCG0000000854	--	Annotated_lncRNA	13117133	13422754	-	ENSSSCT00000011850	ENSSSCG00000010832	HHIPL2	HHIP-like 2 [Source:HGNC Symbol;Acc:HGNC:25842]	13425274	13444208	-	2519	downstream
chr10	ALDBSSCT0000001404	ALDBSSCG0000000854	--	Annotated_lncRNA	13117133	13422754	-	ENSSSCT00000011851	ENSSSCG00000010833	TAF1A	TATA-box binding protein associated factor, RNA polymerase I, A [Source:HGNC Symbol;Acc:HGNC:11532]	13450026	13471505	-	27271	downstream
chr5	ALDBSSCT0000008539	ALDBSSCG0000005199	--	Annotated_lncRNA	30063566	30071684	-	ENSSSCT00000029741	ENSSSCG00000029004	--	--	30142487	30208943	-	70802	downstream
chr5	ALDBSSCT0000008539	ALDBSSCG0000005199	--	Annotated_lncRNA	30063566	30071684	-	ENSSSCT00000000494	ENSSSCG00000000458	MON2	MON2 homolog, regulator of endosome-to-Golgi trafficking [Source:HGNC Symbol;Acc:HGNC:29177]	29870632	30010062	+	53503	downstream
chr5	ALDBSSCT0000008539	ALDBSSCG0000005199	--	Annotated_lncRNA	30063566	30071684	-	ENSSSCT00000028998	ENSSSCG00000021558	--	--	30091942	30105085	+	20257	upstream
chr9	ALDBSSCT0000011054	ALDBSSCG0000006710	--	Annotated_lncRNA	6145060	6145925	+	ENSSSCT00000032582	ENSSSCG00000022572	OR52K1	olfactory receptor family 52 subfamily K member 1 [Source:HGNC Symbol;Acc:HGNC:15222]	6243616	6245450	-	97690	downstream
chr9	ALDBSSCT0000011054	ALDBSSCG0000006710	--	Annotated_lncRNA	6145060	6145925	+	ENSSSCT00000016118	ENSSSCG00000014767	OR51D1	olfactory receptor family 51 subfamily D member 1 [Source:HGNC Symbol;Acc:HGNC:15193]	6122718	6123686	-	21373	upstream
chr9	ALDBSSCT0000011054	ALDBSSCG0000006710	--	Annotated_lncRNA	6145060	6145925	+	ENSSSCT00000016119	ENSSSCG00000014768	TRIM68	tripartite motif containing 68 [Source:HGNC Symbol;Acc:HGNC:21161]	6136129	6143878	+	1181	downstream
chr9	ALDBSSCT0000011054	ALDBSSCG0000006710	--	Annotated_lncRNA	6145060	6145925	+	ENSSSCT00000016116	ENSSSCG00000014765	--	--	6083135	6084218	+	60841	downstream
chr9	ALDBSSCT0000011054	ALDBSSCG0000006710	--	Annotated_lncRNA	6145060	6145925	+	ENSSSCT00000016117	ENSSSCG00000014766	OR51E1	olfactory receptor family 51 subfamily E member 1 [Source:HGNC Symbol;Acc:HGNC:15194]	6108840	6109793	-	35266	upstream
chr9	ALDBSSCT0000011054	ALDBSSCG0000006710	--	Annotated_lncRNA	6145060	6145925	+	ENSSSCT00000016114	ENSSSCG00000014763	--	--	6057763	6058695	+	86364	downstream
chr9	ALDBSSCT0000011054	ALDBSSCG0000006710	--	Annotated_lncRNA	6145060	6145925	+	ENSSSCT00000016115	ENSSSCG00000014764	OR51E2	olfactory receptor family 51 subfamily E member 2 [Source:HGNC Symbol;Acc:HGNC:15195]	6065316	6066278	+	78781	downstream
chr5	ALDBSSCT0000008530	ALDBSSCG0000005190	--	Annotated_lncRNA	23100501	23102266	-	ENSSSCT00000028474	ENSSSCG00000028235	--	--	23174739	23177934	-	72472	downstream
chr5	ALDBSSCT0000008530	ALDBSSCG0000005190	--	Annotated_lncRNA	23100501	23102266	-	ENSSSCT00000000412	ENSSSCG00000000384	NABP2	nucleic acid binding protein 2 [Source:HGNC Symbol;Acc:HGNC:28412]	23036755	23043841	-	56659	upstream
chr5	ALDBSSCT0000008530	ALDBSSCG0000005190	--	Annotated_lncRNA	23100501	23102266	-	ENSSSCT00000000413	ENSSSCG00000000385	SLC39A5	solute carrier family 39 (zinc transporter), member 5 [Source:HGNC Symbol;Acc:HGNC:20502]	23030342	23036143	-	64357	upstream
chr5	ALDBSSCT0000008530	ALDBSSCG0000005190	--	Annotated_lncRNA	23100501	23102266	-	ENSSSCT00000000414	ENSSSCG00000000386	--	--	23011022	23025031	+	75469	downstream
chr5	ALDBSSCT0000008530	ALDBSSCG0000005190	--	Annotated_lncRNA	23100501	23102266	-	ENSSSCT00000000416	ENSSSCG00000000388	--	--	23171404	23172551	+	69137	upstream
chr5	ALDBSSCT0000008530	ALDBSSCG0000005190	--	Annotated_lncRNA	23100501	23102266	-	ENSSSCT00000000417	ENSSSCG00000025467	-	Myosin light polypeptide 6 [Source:UniProtKB/Swiss-Prot;Acc:P60662]	23123886	23127111	+	21619	upstream
chr5	ALDBSSCT0000008530	ALDBSSCG0000005190	--	Annotated_lncRNA	23100501	23102266	-	ENSSSCT00000000418	ENSSSCG00000025467	-	Myosin light polypeptide 6 [Source:UniProtKB/Swiss-Prot;Acc:P60662]	23123886	23127111	+	21619	upstream
chr5	ALDBSSCT0000008530	ALDBSSCG0000005190	--	Annotated_lncRNA	23100501	23102266	-	ENSSSCT00000000419	ENSSSCG00000028808	--	--	23121867	23123593	+	19600	upstream
chr5	ALDBSSCT0000008530	ALDBSSCG0000005190	--	Annotated_lncRNA	23100501	23102266	-	ENSSSCT00000027288	ENSSSCG00000020725	--	--	22968087	23092644	+	7856	downstream
chr5	ALDBSSCT0000008530	ALDBSSCG0000005190	--	Annotated_lncRNA	23100501	23102266	-	ENSSSCT00000031416	ENSSSCG00000028083	--	--	23046383	23071906	+	28594	downstream
chr5	ALDBSSCT0000008530	ALDBSSCG0000005190	--	Annotated_lncRNA	23100501	23102266	-	ENSSSCT00000023380	ENSSSCG00000025190	--	--	23156551	23160356	+	54284	upstream
chr5	ALDBSSCT0000008530	ALDBSSCG0000005190	--	Annotated_lncRNA	23100501	23102266	-	ENSSSCT00000032076	ENSSSCG00000028235	--	--	23174739	23178249	-	72472	downstream
chr5	ALDBSSCT0000008530	ALDBSSCG0000005190	--	Annotated_lncRNA	23100501	23102266	-	ENSSSCT00000032096	ENSSSCG00000022002	--	--	23127539	23149097	-	25272	downstream
chr5	ALDBSSCT0000008530	ALDBSSCG0000005190	--	Annotated_lncRNA	23100501	23102266	-	ENSSSCT00000030426	ENSSSCG00000025190	--	--	23156929	23160356	+	54662	upstream
chr5	ALDBSSCT0000008530	ALDBSSCG0000005190	--	Annotated_lncRNA	23100501	23102266	-	ENSSSCT00000000424	ENSSSCG00000000393	PAN2	PAN2 poly(A) specific ribonuclease subunit [Source:HGNC Symbol;Acc:HGNC:20074]	23191194	23204904	+	88927	upstream
chr5	ALDBSSCT0000008530	ALDBSSCG0000005190	--	Annotated_lncRNA	23100501	23102266	-	ENSSSCT00000000403	ENSSSCG00000000377	--	--	23103687	23107038	-	1420	downstream
chr5	ALDBSSCT0000008530	ALDBSSCG0000005190	--	Annotated_lncRNA	23100501	23102266	-	ENSSSCT00000031652	ENSSSCG00000021091	CS	citrate synthase [Source:HGNC Symbol;Acc:HGNC:2422]	23083204	23085626	-	14874	upstream
chr5	ALDBSSCT0000008530	ALDBSSCG0000005190	--	Annotated_lncRNA	23100501	23102266	-	ENSSSCT00000000405	ENSSSCG00000000379	ESYT1	extended synaptotagmin-like protein 1 [Source:HGNC Symbol;Acc:HGNC:29534]	22985740	23005497	+	95003	downstream
chr5	ALDBSSCT0000008530	ALDBSSCG0000005190	--	Annotated_lncRNA	23100501	23102266	-	ENSSSCT00000029154	ENSSSCG00000022858	--	--	23162527	23165524	-	60260	downstream
chr5	ALDBSSCT0000008532	ALDBSSCG0000005192	--	Annotated_lncRNA	23652207	23657322	-	ENSSSCT00000033906	ENSSSCG00000000405	ATP5B	ATP synthase, H+ transporting, mitochondrial F1 complex, beta polypeptide [Source:HGNC Symbol;Acc:HGNC:830]	23659084	23666689	-	1761	downstream
chr5	ALDBSSCT0000008532	ALDBSSCG0000005192	--	Annotated_lncRNA	23652207	23657322	-	ENSSSCT00000025543	ENSSSCG00000020830	NACA	-	23718924	23752045	-	61601	downstream
chr5	ALDBSSCT0000008532	ALDBSSCG0000005192	--	Annotated_lncRNA	23652207	23657322	-	ENSSSCT00000033645	ENSSSCG00000020830	NACA	-	23718960	23728936	-	61637	downstream
chr5	ALDBSSCT0000008532	ALDBSSCG0000005192	--	Annotated_lncRNA	23652207	23657322	-	ENSSSCT00000000438	ENSSSCG00000000405	ATP5B	ATP synthase, H+ transporting, mitochondrial F1 complex, beta polypeptide [Source:HGNC Symbol;Acc:HGNC:830]	23659084	23666696	-	1761	downstream
chr5	ALDBSSCT0000008532	ALDBSSCG0000005192	--	Annotated_lncRNA	23652207	23657322	-	ENSSSCT00000000439	ENSSSCG00000000406	PTGES3	prostaglandin E synthase 3 [Source:HGNC Symbol;Acc:HGNC:16049]	23674710	23695919	-	17387	downstream
chr5	ALDBSSCT0000008532	ALDBSSCG0000005192	--	Annotated_lncRNA	23652207	23657322	-	ENSSSCT00000000436	ENSSSCG00000000403	BAZ2A	bromodomain adjacent to zinc finger domain 2A [Source:HGNC Symbol;Acc:HGNC:962]	23608231	23638130	-	14076	upstream
chr5	ALDBSSCT0000008532	ALDBSSCG0000005192	--	Annotated_lncRNA	23652207	23657322	-	ENSSSCT00000000442	ENSSSCG00000000408	--	--	23735545	23749965	-	78222	downstream
chr5	ALDBSSCT0000008532	ALDBSSCG0000005192	--	Annotated_lncRNA	23652207	23657322	-	ENSSSCT00000032195	ENSSSCG00000000403	BAZ2A	bromodomain adjacent to zinc finger domain 2A [Source:HGNC Symbol;Acc:HGNC:962]	23608231	23638124	-	14082	upstream
chr9	ALDBSSCT0000011237	ALDBSSCG0000006822	--	Annotated_lncRNA	70867594	70868740	+	ENSSSCT00000023057	ENSSSCG00000023562	SNRPE	small nuclear ribonucleoprotein polypeptide E [Source:HGNC Symbol;Acc:HGNC:11161]	70909005	70915566	+	40264	upstream
chr9	ALDBSSCT0000011237	ALDBSSCG0000006822	--	Annotated_lncRNA	70867594	70868740	+	ENSSSCT00000016643	ENSSSCG00000015274	ZBED6	zinc finger, BED-type containing 6 [Source:HGNC Symbol;Acc:HGNC:33273]	70869462	70872407	+	721	upstream
chr9	ALDBSSCT0000011237	ALDBSSCG0000006822	--	Annotated_lncRNA	70867594	70868740	+	ENSSSCT00000024637	ENSSSCG00000028069	--	--	70784156	70815137	-	52456	upstream
chr9	ALDBSSCT0000011237	ALDBSSCG0000006822	--	Annotated_lncRNA	70867594	70868740	+	ENSSSCT00000030950	ENSSSCG00000022036	--	--	70816026	70821128	+	46465	downstream
chr9	ALDBSSCT0000011237	ALDBSSCG0000006822	--	Annotated_lncRNA	70867594	70868740	+	ENSSSCT00000027953	ENSSSCG00000028035	ZC3H11A	zinc finger CCCH-type containing 11A [Source:HGNC Symbol;Acc:HGNC:29093]	70877652	70903649	+	8911	upstream
chr7	ALDBSSCT0000009759	ALDBSSCG0000005956	--	Annotated_lncRNA	48191272	48197222	+	ENSSSCT00000031864	ENSSSCG00000029439	ANKRD66	ankyrin repeat domain 66 [Source:HGNC Symbol;Acc:HGNC:44669]	48208073	48219751	+	10850	upstream
chr7	ALDBSSCT0000009759	ALDBSSCG0000005956	--	Annotated_lncRNA	48191272	48197222	+	ENSSSCT00000025267	ENSSSCG00000021218	TDRD6	tudor domain containing 6 [Source:HGNC Symbol;Acc:HGNC:21339]	48129443	48145173	+	46098	downstream
chr7	ALDBSSCT0000009759	ALDBSSCG0000005956	--	Annotated_lncRNA	48191272	48197222	+	ENSSSCT00000001928	ENSSSCG00000001724	MEP1A	meprin A subunit alpha [Source:HGNC Symbol;Acc:HGNC:7015]	48248970	48286177	+	51747	upstream
chr7	ALDBSSCT0000009759	ALDBSSCG0000005956	--	Annotated_lncRNA	48191272	48197222	+	ENSSSCT00000001927	ENSSSCG00000001723	PLA2G7	phospholipase A2 group VII [Source:HGNC Symbol;Acc:HGNC:9040]	48147617	48174888	-	16383	upstream
chr7	ALDBSSCT0000009759	ALDBSSCG0000005956	--	Annotated_lncRNA	48191272	48197222	+	ENSSSCT00000031260	ENSSSCG00000001720	--	--	48092202	48120889	+	70382	downstream
chr7	ALDBSSCT0000009759	ALDBSSCG0000005956	--	Annotated_lncRNA	48191272	48197222	+	ENSSSCT00000001923	ENSSSCG00000001720	--	--	48092202	48119340	+	71931	downstream
chr7	ALDBSSCT0000009759	ALDBSSCG0000005956	--	Annotated_lncRNA	48191272	48197222	+	ENSSSCT00000001922	ENSSSCG00000001719	--	--	48018379	48092045	-	99226	upstream
chr7	ALDBSSCT0000009759	ALDBSSCG0000005956	--	Annotated_lncRNA	48191272	48197222	+	ENSSSCT00000022332	ENSSSCG00000001724	MEP1A	meprin A subunit alpha [Source:HGNC Symbol;Acc:HGNC:7015]	48248958	48285544	+	51735	upstream
chr1	ALDBSSCT0000000049	ALDBSSCG0000000030	--	Annotated_lncRNA	13726855	13756905	+	ENSSSCT00000004494	ENSSSCG00000004065	TIAM2	T-cell lymphoma invasion and metastasis 2 [Source:HGNC Symbol;Acc:HGNC:11806]	13623107	13709653	-	17201	upstream
chr1	ALDBSSCT0000000049	ALDBSSCG0000000030	--	Annotated_lncRNA	13726855	13756905	+	ENSSSCT00000027128	ENSSSCG00000004065	TIAM2	T-cell lymphoma invasion and metastasis 2 [Source:HGNC Symbol;Acc:HGNC:11806]	13622194	13709772	-	17082	upstream
chr15	ALDBSSCT0000004578	ALDBSSCG0000002782	--	Annotated_lncRNA	116425426	116435610	-	ENSSSCT00000024437	ENSSSCG00000022805	--	--	116436598	116437899	+	987	upstream
chr15	ALDBSSCT0000004578	ALDBSSCG0000002782	--	Annotated_lncRNA	116425426	116435610	-	ENSSSCT00000027514	ENSSSCG00000025774	STRADB	STE20-related kinase adaptor beta [Source:HGNC Symbol;Acc:HGNC:13205]	116468163	116468414	-	32552	downstream
chr15	ALDBSSCT0000004578	ALDBSSCG0000002782	--	Annotated_lncRNA	116425426	116435610	-	ENSSSCT00000017534	ENSSSCG00000016104	TRAK2	trafficking protein, kinesin binding 2 [Source:HGNC Symbol;Acc:HGNC:13206]	116383931	116416265	-	9160	upstream
chr15	ALDBSSCT0000004578	ALDBSSCG0000002782	--	Annotated_lncRNA	116425426	116435610	-	ENSSSCT00000017535	ENSSSCG00000016105	ALS2CR12	amyotrophic lateral sclerosis 2 chromosome region candidate 12 [Source:HGNC Symbol;Acc:HGNC:14439]	116343375	116378421	-	47004	upstream
chr15	ALDBSSCT0000004578	ALDBSSCG0000002782	--	Annotated_lncRNA	116425426	116435610	-	ENSSSCT00000024231	ENSSSCG00000028157	--	--	116275040	116341166	+	84259	downstream
chr3	ALDBSSCT0000006722	ALDBSSCG0000004101	--	Annotated_lncRNA	54960494	54961251	+	ENSSSCT00000030337	ENSSSCG00000028331	IL1R2	interleukin-1 receptor type 2 precursor [Source:RefSeq peptide;Acc:NP_001230292]	54901371	54919900	-	40593	upstream
chr3	ALDBSSCT0000006722	ALDBSSCG0000004101	--	Annotated_lncRNA	54960494	54961251	+	ENSSSCT00000008940	ENSSSCG00000008163	IL1R2	-	54939544	54952578	+	7915	downstream
chr3	ALDBSSCT0000006722	ALDBSSCG0000004101	--	Annotated_lncRNA	54960494	54961251	+	ENSSSCT00000008941	ENSSSCG00000008164	MAP4K4	mitogen-activated protein kinase kinase kinase kinase 4 [Source:HGNC Symbol;Acc:HGNC:6866]	55031471	55095734	-	70219	downstream
chr3	ALDBSSCT0000006728	ALDBSSCG0000004104	--	Annotated_lncRNA	56417412	56446272	+	ENSSSCT00000008954	ENSSSCG00000008176	LONRF2	LON peptidase N-terminal domain and ring finger 2 [Source:HGNC Symbol;Acc:HGNC:24788]	56528025	56556743	+	81752	upstream
chr3	ALDBSSCT0000006728	ALDBSSCG0000004104	--	Annotated_lncRNA	56417412	56446272	+	ENSSSCT00000008953	ENSSSCG00000008175	CHST10	carbohydrate sulfotransferase 10 [Source:HGNC Symbol;Acc:HGNC:19650]	56449363	56485211	+	3090	upstream
chr3	ALDBSSCT0000006728	ALDBSSCG0000004104	--	Annotated_lncRNA	56417412	56446272	+	ENSSSCT00000023061	ENSSSCG00000008176	LONRF2	LON peptidase N-terminal domain and ring finger 2 [Source:HGNC Symbol;Acc:HGNC:24788]	56528025	56556728	+	81752	upstream
chr7	ALDBSSCT0000009919	ALDBSSCG0000006039	--	Annotated_lncRNA	110021314	110021777	+	ENSSSCT00000029391	ENSSSCG00000002411	GTF2A1	general transcription factor IIA 1 [Source:HGNC Symbol;Acc:HGNC:4646]	109960916	109992425	-	28888	upstream
chr7	ALDBSSCT0000009919	ALDBSSCG0000006039	--	Annotated_lncRNA	110021314	110021777	+	ENSSSCT00000002681	ENSSSCG00000002412	STON2	stonin 2 [Source:HGNC Symbol;Acc:HGNC:30652]	110036580	110150787	-	14802	downstream
chr7	ALDBSSCT0000009919	ALDBSSCG0000006039	--	Annotated_lncRNA	110021314	110021777	+	ENSSSCT00000002680	ENSSSCG00000002411	GTF2A1	general transcription factor IIA 1 [Source:HGNC Symbol;Acc:HGNC:4646]	109960916	109992497	-	28816	upstream
chr7	ALDBSSCT0000009918	ALDBSSCG0000006038	--	Annotated_lncRNA	110020362	110023091	+	ENSSSCT00000029391	ENSSSCG00000002411	GTF2A1	general transcription factor IIA 1 [Source:HGNC Symbol;Acc:HGNC:4646]	109960916	109992425	-	27936	upstream
chr7	ALDBSSCT0000009918	ALDBSSCG0000006038	--	Annotated_lncRNA	110020362	110023091	+	ENSSSCT00000002681	ENSSSCG00000002412	STON2	stonin 2 [Source:HGNC Symbol;Acc:HGNC:30652]	110036580	110150787	-	13488	downstream
chr7	ALDBSSCT0000009918	ALDBSSCG0000006038	--	Annotated_lncRNA	110020362	110023091	+	ENSSSCT00000002680	ENSSSCG00000002411	GTF2A1	general transcription factor IIA 1 [Source:HGNC Symbol;Acc:HGNC:4646]	109960916	109992497	-	27864	upstream
chr3	ENSSSCT00000034217	ENSSSCG00000008496	EIF2AK2	Annotated_lncRNA	109622369	109667785	+	ENSSSCT00000009297	ENSSSCG00000008495	PRKD3	protein kinase D3 [Source:HGNC Symbol;Acc:HGNC:9408]	109443446	109545346	-	77022	upstream
chr3	ENSSSCT00000034217	ENSSSCG00000008496	EIF2AK2	Annotated_lncRNA	109622369	109667785	+	ENSSSCT00000028150	ENSSSCG00000025181	--	--	109622373	109637816	-	-15444	antisense
chr3	ENSSSCT00000034217	ENSSSCG00000008496	EIF2AK2	Annotated_lncRNA	109622369	109667785	+	ENSSSCT00000009299	ENSSSCG00000008497	GPATCH11	G-patch domain containing 11 [Source:HGNC Symbol;Acc:HGNC:26768]	109677473	109691729	-	9687	downstream
chr3	ENSSSCT00000034217	ENSSSCG00000008496	EIF2AK2	Annotated_lncRNA	109622369	109667785	+	ENSSSCT00000009300	ENSSSCG00000008498	HEATR5B	HEAT repeat containing 5B [Source:HGNC Symbol;Acc:HGNC:29273]	109692688	109810357	+	24902	upstream
chr12	ALDBSSCT0000002240	ALDBSSCG0000001347	--	Annotated_lncRNA	39655190	39656750	+	ENSSSCT00000032087	ENSSSCG00000023186	CA4	carbonic anhydrase IV [Source:HGNC Symbol;Acc:HGNC:1375]	39632792	39642292	+	12897	downstream
chr12	ALDBSSCT0000002240	ALDBSSCG0000001347	--	Annotated_lncRNA	39655190	39656750	+	ENSSSCT00000019246	ENSSSCG00000017682	MYO19	myosin XIX [Source:HGNC Symbol;Acc:HGNC:26234]	39554707	39583472	+	71717	downstream
chr12	ALDBSSCT0000002240	ALDBSSCG0000001347	--	Annotated_lncRNA	39655190	39656750	+	ENSSSCT00000019252	ENSSSCG00000017688	GGNBP2	gametogenetin binding protein 2 [Source:HGNC Symbol;Acc:HGNC:19357]	39694977	39730210	+	38226	upstream
chr12	ALDBSSCT0000002240	ALDBSSCG0000001347	--	Annotated_lncRNA	39655190	39656750	+	ENSSSCT00000032517	ENSSSCG00000023373	ZNHIT3	zinc finger, HIT-type containing 3 [Source:HGNC Symbol;Acc:HGNC:12309]	39584265	39590233	-	64956	upstream
chr12	ALDBSSCT0000002240	ALDBSSCG0000001347	--	Annotated_lncRNA	39655190	39656750	+	ENSSSCT00000019254	ENSSSCG00000017690	DHRS11	dehydrogenase/reductase (SDR family) member 11 [Source:HGNC Symbol;Acc:HGNC:28639]	39732508	39741854	+	75757	upstream
chr12	ALDBSSCT0000002240	ALDBSSCG0000001347	--	Annotated_lncRNA	39655190	39656750	+	ENSSSCT00000019255	ENSSSCG00000017691	MRM1	mitochondrial rRNA methyltransferase 1 [Source:HGNC Symbol;Acc:HGNC:26202]	39742895	39748445	+	86144	upstream
chr5	ALDBSSCT0000008407	ALDBSSCG0000005106	--	Annotated_lncRNA	86263829	86268052	+	ENSSSCT00000035178	ENSSSCG00000023972	DRAM1	DNA damage regulated autophagy modulator 1 [Source:HGNC Symbol;Acc:HGNC:25645]	86274166	86288364	-	6113	downstream
chr5	ALDBSSCT0000008407	ALDBSSCG0000005106	--	Annotated_lncRNA	86263829	86268052	+	ENSSSCT00000028915	ENSSSCG00000000862	--	--	86352832	86413187	+	84779	upstream
chr5	ALDBSSCT0000008407	ALDBSSCG0000005106	--	Annotated_lncRNA	86263829	86268052	+	ENSSSCT00000029179	ENSSSCG00000026250	--	--	86166626	86207763	+	56065	downstream
chr5	ALDBSSCT0000008407	ALDBSSCG0000005106	--	Annotated_lncRNA	86263829	86268052	+	ENSSSCT00000036399	ENSSSCG00000023972	DRAM1	DNA damage regulated autophagy modulator 1 [Source:HGNC Symbol;Acc:HGNC:25645]	86273946	86292147	-	5893	downstream
chr5	ALDBSSCT0000008407	ALDBSSCG0000005106	--	Annotated_lncRNA	86263829	86268052	+	ENSSSCT00000034650	ENSSSCG00000023972	DRAM1	DNA damage regulated autophagy modulator 1 [Source:HGNC Symbol;Acc:HGNC:25645]	86272194	86292147	-	4141	downstream
chr5	ALDBSSCT0000008407	ALDBSSCG0000005106	--	Annotated_lncRNA	86263829	86268052	+	ENSSSCT00000029052	ENSSSCG00000023972	DRAM1	DNA damage regulated autophagy modulator 1 [Source:HGNC Symbol;Acc:HGNC:25645]	86272186	86308016	-	4133	downstream
chr5	ALDBSSCT0000008403	ALDBSSCG0000005104	--	Annotated_lncRNA	86209540	86234219	+	ENSSSCT00000035178	ENSSSCG00000023972	DRAM1	DNA damage regulated autophagy modulator 1 [Source:HGNC Symbol;Acc:HGNC:25645]	86274166	86288364	-	39946	downstream
chr5	ALDBSSCT0000008403	ALDBSSCG0000005104	--	Annotated_lncRNA	86209540	86234219	+	ENSSSCT00000000939	ENSSSCG00000000860	--	--	86067273	86118726	+	90813	downstream
chr5	ALDBSSCT0000008403	ALDBSSCG0000005104	--	Annotated_lncRNA	86209540	86234219	+	ENSSSCT00000029179	ENSSSCG00000026250	--	--	86166626	86207763	+	1776	downstream
chr5	ALDBSSCT0000008403	ALDBSSCG0000005104	--	Annotated_lncRNA	86209540	86234219	+	ENSSSCT00000036399	ENSSSCG00000023972	DRAM1	DNA damage regulated autophagy modulator 1 [Source:HGNC Symbol;Acc:HGNC:25645]	86273946	86292147	-	39726	downstream
chr5	ALDBSSCT0000008403	ALDBSSCG0000005104	--	Annotated_lncRNA	86209540	86234219	+	ENSSSCT00000034650	ENSSSCG00000023972	DRAM1	DNA damage regulated autophagy modulator 1 [Source:HGNC Symbol;Acc:HGNC:25645]	86272194	86292147	-	37974	downstream
chr5	ALDBSSCT0000008403	ALDBSSCG0000005104	--	Annotated_lncRNA	86209540	86234219	+	ENSSSCT00000029052	ENSSSCG00000023972	DRAM1	DNA damage regulated autophagy modulator 1 [Source:HGNC Symbol;Acc:HGNC:25645]	86272186	86308016	-	37966	downstream
chr3	ALDBSSCT0000007092	ALDBSSCG0000004311	--	Annotated_lncRNA	34638450	34639357	-	ENSSSCT00000008668	ENSSSCG00000007909	ABAT	4-aminobutyrate aminotransferase [Source:HGNC Symbol;Acc:HGNC:23]	34642449	34682259	-	3091	downstream
chr3	ALDBSSCT0000007092	ALDBSSCG0000004311	--	Annotated_lncRNA	34638450	34639357	-	ENSSSCT00000025298	ENSSSCG00000021710	PMM2	phosphomannomutase 2 [Source:HGNC Symbol;Acc:HGNC:9115]	34602869	34621554	-	16895	upstream
chr3	ALDBSSCT0000007092	ALDBSSCG0000004311	--	Annotated_lncRNA	34638450	34639357	-	ENSSSCT00000008664	ENSSSCG00000007907	USP7	ubiquitin specific peptidase 7 (herpes virus-associated) [Source:HGNC Symbol;Acc:HGNC:12630]	34686456	34742973	-	47098	downstream
chr3	ALDBSSCT0000007092	ALDBSSCG0000004311	--	Annotated_lncRNA	34638450	34639357	-	ENSSSCT00000022905	ENSSSCG00000021288	TMEM186	transmembrane protein 186 [Source:HGNC Symbol;Acc:HGNC:24530]	34622746	34623384	+	15065	downstream
chr5	ALDBSSCT0000008392	ALDBSSCG0000005102	--	Annotated_lncRNA	83903813	83905841	+	ENSSSCT00000000919	ENSSSCG00000000844	NFYB	nuclear transcription factor Y subunit beta [Source:HGNC Symbol;Acc:HGNC:7805]	83912608	83923010	+	6766	upstream
chr5	ALDBSSCT0000008392	ALDBSSCG0000005102	--	Annotated_lncRNA	83903813	83905841	+	ENSSSCT00000000925	ENSSSCG00000000848	GLT8D2	glycosyltransferase 8 domain containing 2 [Source:HGNC Symbol;Acc:HGNC:24890]	83991461	84048064	+	85619	upstream
chr5	ALDBSSCT0000008392	ALDBSSCG0000005102	--	Annotated_lncRNA	83903813	83905841	+	ENSSSCT00000000923	ENSSSCG00000000846	HCFC2	host cell factor C2 [Source:HGNC Symbol;Acc:HGNC:24972]	83939559	83979588	-	33717	downstream
chr4	ALDBSSCT0000008083	ALDBSSCG0000004905	--	Annotated_lncRNA	108784575	108785508	-	ENSSSCT00000031951	ENSSSCG00000022644	HIST2H2BF	histone cluster 2, H2bf [Source:HGNC Symbol;Acc:HGNC:24700]	108797102	108798285	-	11593	downstream
chr4	ALDBSSCT0000008083	ALDBSSCG0000004905	--	Annotated_lncRNA	108784575	108785508	-	ENSSSCT00000007316	ENSSSCG00000006678	FCGR1A	-	108773581	108782557	+	2017	downstream
chr4	ALDBSSCT0000008083	ALDBSSCG0000004905	--	Annotated_lncRNA	108784575	108785508	-	ENSSSCT00000028527	ENSSSCG00000026778	--	--	108799313	108799723	-	13804	downstream
chr4	ALDBSSCT0000008083	ALDBSSCG0000004905	--	Annotated_lncRNA	108784575	108785508	-	ENSSSCT00000033004	ENSSSCG00000006678	FCGR1A	-	108773581	108782557	+	2017	downstream
chr4	ALDBSSCT0000008083	ALDBSSCG0000004905	--	Annotated_lncRNA	108784575	108785508	-	ENSSSCT00000030537	ENSSSCG00000028729	-	Histone H4 [Source:UniProtKB/Swiss-Prot;Acc:P62802]	108807243	108807554	+	21734	upstream
chr4	ALDBSSCT0000008083	ALDBSSCG0000004905	--	Annotated_lncRNA	108784575	108785508	-	ENSSSCT00000028746	ENSSSCG00000026982	HIST2H3D	histone cluster 2, H3d [Source:HGNC Symbol;Acc:HGNC:25311]	108826511	108826921	+	41002	upstream
chr4	ALDBSSCT0000008083	ALDBSSCG0000004905	--	Annotated_lncRNA	108784575	108785508	-	ENSSSCT00000007307	ENSSSCG00000006669	HIST2H2AC	histone cluster 2, H2ac [Source:HGNC Symbol;Acc:HGNC:4738]	108844964	108845456	+	59455	upstream
chr4	ALDBSSCT0000008083	ALDBSSCG0000004905	--	Annotated_lncRNA	108784575	108785508	-	ENSSSCT00000036011	ENSSSCG00000006678	FCGR1A	-	108759133	108774836	+	9738	downstream
chr4	ALDBSSCT0000008083	ALDBSSCG0000004905	--	Annotated_lncRNA	108784575	108785508	-	ENSSSCT00000007317	ENSSSCG00000006679	--	--	108738766	108756020	-	28554	upstream
chr4	ALDBSSCT0000008083	ALDBSSCG0000004905	--	Annotated_lncRNA	108784575	108785508	-	ENSSSCT00000023451	ENSSSCG00000023770	--	--	108823396	108824575	-	37887	downstream
chr4	ALDBSSCT0000008083	ALDBSSCG0000004905	--	Annotated_lncRNA	108784575	108785508	-	ENSSSCT00000007310	ENSSSCG00000026938	HIST2H2AA4	histone cluster 2, H2aa4 [Source:HGNC Symbol;Acc:HGNC:29668]	108824929	108825321	+	39420	upstream
chr4	ALDBSSCT0000008083	ALDBSSCG0000004905	--	Annotated_lncRNA	108784575	108785508	-	ENSSSCT00000024588	ENSSSCG00000022944	HIST2H2BE	histone cluster 2, H2be [Source:HGNC Symbol;Acc:HGNC:4760]	108844274	108844654	-	58765	downstream
chr4	ALDBSSCT0000008083	ALDBSSCG0000004905	--	Annotated_lncRNA	108784575	108785508	-	ENSSSCT00000025765	ENSSSCG00000024116	--	--	108816815	108818199	+	31306	upstream
chr4	ALDBSSCT0000008083	ALDBSSCG0000004905	--	Annotated_lncRNA	108784575	108785508	-	ENSSSCT00000036053	ENSSSCG00000006678	FCGR1A	-	108759669	108782158	+	2416	downstream
chr4	ALDBSSCT0000008084	ALDBSSCG0000004906	--	Annotated_lncRNA	109365513	109366713	-	ENSSSCT00000007331	ENSSSCG00000006692	--	--	109372724	109405678	-	6010	downstream
chr4	ALDBSSCT0000008084	ALDBSSCG0000004906	--	Annotated_lncRNA	109365513	109366713	-	ENSSSCT00000007332	ENSSSCG00000006693	PDZK1	PDZ domain containing 1 [Source:HGNC Symbol;Acc:HGNC:8821]	109286295	109318377	-	47135	upstream
chr4	ALDBSSCT0000008084	ALDBSSCG0000004906	--	Annotated_lncRNA	109365513	109366713	-	ENSSSCT00000029430	ENSSSCG00000021304	--	--	109267880	109289998	+	75514	downstream
chr4	ALDBSSCT0000008085	ALDBSSCG0000004907	--	Annotated_lncRNA	109825189	109830902	-	ENSSSCT00000007336	ENSSSCG00000006697	ACP6	acid phosphatase 6, lysophosphatidic [Source:HGNC Symbol;Acc:HGNC:29609]	109763760	109781621	+	43567	downstream
chr4	ALDBSSCT0000008085	ALDBSSCG0000004907	--	Annotated_lncRNA	109825189	109830902	-	ENSSSCT00000007337	ENSSSCG00000006698	BCL9	B-cell CLL/lymphoma 9 [Source:HGNC Symbol;Acc:HGNC:1008]	109803776	109819766	-	5422	upstream
chr4	ALDBSSCT0000008086	ALDBSSCG0000004908	--	Annotated_lncRNA	110221245	110255365	-	ENSSSCT00000034808	ENSSSCG00000006703	PRKAB2	protein kinase, AMP-activated, beta 2 non-catalytic subunit [Source:HGNC Symbol;Acc:HGNC:9379]	110208123	110219705	+	1539	downstream
chr4	ALDBSSCT0000008086	ALDBSSCG0000004908	--	Annotated_lncRNA	110221245	110255365	-	ENSSSCT00000007341	ENSSSCG00000006702	FMO5	flavin containing monooxygenase 5 [Source:HGNC Symbol;Acc:HGNC:3773]	110166400	110202848	+	18396	downstream
chr4	ALDBSSCT0000008086	ALDBSSCG0000004908	--	Annotated_lncRNA	110221245	110255365	-	ENSSSCT00000007340	ENSSSCG00000006701	CHD1L	chromodomain helicase DNA binding protein 1-like [Source:HGNC Symbol;Acc:HGNC:1916]	110094460	110148302	-	72942	upstream
chr4	ALDBSSCT0000008086	ALDBSSCG0000004908	--	Annotated_lncRNA	110221245	110255365	-	ENSSSCT00000007343	ENSSSCG00000006704	--	--	110281179	110293011	-	25813	downstream
chr4	ALDBSSCT0000008086	ALDBSSCG0000004908	--	Annotated_lncRNA	110221245	110255365	-	ENSSSCT00000007342	ENSSSCG00000006703	PRKAB2	protein kinase, AMP-activated, beta 2 non-catalytic subunit [Source:HGNC Symbol;Acc:HGNC:9379]	110208095	110219705	+	1539	downstream
chr4	ALDBSSCT0000008086	ALDBSSCG0000004908	--	Annotated_lncRNA	110221245	110255365	-	ENSSSCT00000032787	ENSSSCG00000006703	PRKAB2	protein kinase, AMP-activated, beta 2 non-catalytic subunit [Source:HGNC Symbol;Acc:HGNC:9379]	110208095	110219822	+	1422	downstream
chr4	ALDBSSCT0000008086	ALDBSSCG0000004908	--	Annotated_lncRNA	110221245	110255365	-	ENSSSCT00000034207	ENSSSCG00000006703	PRKAB2	protein kinase, AMP-activated, beta 2 non-catalytic subunit [Source:HGNC Symbol;Acc:HGNC:9379]	110208121	110217459	+	3785	downstream
chr4	ALDBSSCT0000008086	ALDBSSCG0000004908	--	Annotated_lncRNA	110221245	110255365	-	ENSSSCT00000025431	ENSSSCG00000021345	--	--	110329924	110335196	+	74558	upstream
chr4	ALDBSSCT0000008086	ALDBSSCG0000004908	--	Annotated_lncRNA	110221245	110255365	-	ENSSSCT00000036163	ENSSSCG00000006703	PRKAB2	protein kinase, AMP-activated, beta 2 non-catalytic subunit [Source:HGNC Symbol;Acc:HGNC:9379]	110207628	110219705	+	1539	downstream
chr15	ALDBSSCT0000004289	ALDBSSCG0000002598	--	Annotated_lncRNA	117382781	117384523	+	ENSSSCT00000029321	ENSSSCG00000022225	NOP58	NOP58 ribonucleoprotein [Source:HGNC Symbol;Acc:HGNC:29926]	117351067	117375010	+	7770	downstream
chr15	ALDBSSCT0000004289	ALDBSSCG0000002598	--	Annotated_lncRNA	117382781	117384523	+	ENSSSCT00000034414	ENSSSCG00000016113	BMPR2	bone morphogenetic protein receptor type II [Source:HGNC Symbol;Acc:HGNC:1078]	117425964	117426867	+	41440	upstream
chr15	ALDBSSCT0000004289	ALDBSSCG0000002598	--	Annotated_lncRNA	117382781	117384523	+	ENSSSCT00000017544	ENSSSCG00000016113	BMPR2	bone morphogenetic protein receptor type II [Source:HGNC Symbol;Acc:HGNC:1078]	117426776	117589050	+	42252	upstream
chr4	ALDBSSCT0000008088	ALDBSSCG0000004909	--	Annotated_lncRNA	110270405	110272230	-	ENSSSCT00000034808	ENSSSCG00000006703	PRKAB2	protein kinase, AMP-activated, beta 2 non-catalytic subunit [Source:HGNC Symbol;Acc:HGNC:9379]	110208123	110219705	+	50699	downstream
chr4	ALDBSSCT0000008088	ALDBSSCG0000004909	--	Annotated_lncRNA	110270405	110272230	-	ENSSSCT00000007341	ENSSSCG00000006702	FMO5	flavin containing monooxygenase 5 [Source:HGNC Symbol;Acc:HGNC:3773]	110166400	110202848	+	67556	downstream
chr4	ALDBSSCT0000008088	ALDBSSCG0000004909	--	Annotated_lncRNA	110270405	110272230	-	ENSSSCT00000007343	ENSSSCG00000006704	--	--	110281179	110293011	-	8948	downstream
chr4	ALDBSSCT0000008088	ALDBSSCG0000004909	--	Annotated_lncRNA	110270405	110272230	-	ENSSSCT00000007342	ENSSSCG00000006703	PRKAB2	protein kinase, AMP-activated, beta 2 non-catalytic subunit [Source:HGNC Symbol;Acc:HGNC:9379]	110208095	110219705	+	50699	downstream
chr4	ALDBSSCT0000008088	ALDBSSCG0000004909	--	Annotated_lncRNA	110270405	110272230	-	ENSSSCT00000032787	ENSSSCG00000006703	PRKAB2	protein kinase, AMP-activated, beta 2 non-catalytic subunit [Source:HGNC Symbol;Acc:HGNC:9379]	110208095	110219822	+	50582	downstream
chr4	ALDBSSCT0000008088	ALDBSSCG0000004909	--	Annotated_lncRNA	110270405	110272230	-	ENSSSCT00000034207	ENSSSCG00000006703	PRKAB2	protein kinase, AMP-activated, beta 2 non-catalytic subunit [Source:HGNC Symbol;Acc:HGNC:9379]	110208121	110217459	+	52945	downstream
chr4	ALDBSSCT0000008088	ALDBSSCG0000004909	--	Annotated_lncRNA	110270405	110272230	-	ENSSSCT00000025431	ENSSSCG00000021345	--	--	110329924	110335196	+	57693	upstream
chr4	ALDBSSCT0000008088	ALDBSSCG0000004909	--	Annotated_lncRNA	110270405	110272230	-	ENSSSCT00000036163	ENSSSCG00000006703	PRKAB2	protein kinase, AMP-activated, beta 2 non-catalytic subunit [Source:HGNC Symbol;Acc:HGNC:9379]	110207628	110219705	+	50699	downstream
chr15	ALDBSSCT0000004287	ALDBSSCG0000002596	--	Annotated_lncRNA	116670054	116684632	+	ENSSSCT00000017537	ENSSSCG00000016107	ALS2CR11	amyotrophic lateral sclerosis 2 chromosome region candidate 11 [Source:HGNC Symbol;Acc:HGNC:14438]	116627556	116650776	+	19277	downstream
chr7	ALDBSSCT0000009620	ALDBSSCG0000005869	--	Annotated_lncRNA	4525577	4590732	+	ENSSSCT00000001114	ENSSSCG00000001021	RREB1	ras responsive element binding protein 1 [Source:HGNC Symbol;Acc:HGNC:10449]	4591378	4652479	+	645	upstream
chr7	ALDBSSCT0000009620	ALDBSSCG0000005869	--	Annotated_lncRNA	4525577	4590732	+	ENSSSCT00000030973	ENSSSCG00000001021	RREB1	ras responsive element binding protein 1 [Source:HGNC Symbol;Acc:HGNC:10449]	4591378	4652479	+	645	upstream
chr7	ALDBSSCT0000009620	ALDBSSCG0000005869	--	Annotated_lncRNA	4525577	4590732	+	ENSSSCT00000027679	ENSSSCG00000001021	RREB1	ras responsive element binding protein 1 [Source:HGNC Symbol;Acc:HGNC:10449]	4591378	4631336	+	645	upstream
chr7	ALDBSSCT0000009620	ALDBSSCG0000005869	--	Annotated_lncRNA	4525577	4590732	+	ENSSSCT00000001115	ENSSSCG00000001022	SSR1	signal sequence receptor, alpha [Source:RefSeq peptide;Acc:NP_001172096]	4677876	4698116	-	87143	downstream
chr15	ALDBSSCT0000004281	ALDBSSCG0000002593	--	Annotated_lncRNA	115151324	115236157	+	ENSSSCT00000017518	ENSSSCG00000016090	SPATS2L	spermatogenesis associated, serine rich 2 like [Source:HGNC Symbol;Acc:HGNC:24574]	115266549	115332003	+	30391	upstream
chr5	ALDBSSCT0000008244	ALDBSSCG0000005005	--	Annotated_lncRNA	3632849	3642673	+	ENSSSCT00000000044	ENSSSCG00000000041	WBP2NL	WBP2 N-terminal like [Source:HGNC Symbol;Acc:HGNC:28389]	3724912	3748546	+	82238	upstream
chr5	ALDBSSCT0000008244	ALDBSSCG0000005005	--	Annotated_lncRNA	3632849	3642673	+	ENSSSCT00000000043	ENSSSCG00000000041	WBP2NL	WBP2 N-terminal like [Source:HGNC Symbol;Acc:HGNC:28389]	3724912	3748576	+	82238	upstream
chr5	ALDBSSCT0000008244	ALDBSSCG0000005005	--	Annotated_lncRNA	3632849	3642673	+	ENSSSCT00000000042	ENSSSCG00000000040	2017-09-03	septin 3 [Source:HGNC Symbol;Acc:HGNC:10750]	3698552	3721328	+	55878	upstream
chr5	ALDBSSCT0000008244	ALDBSSCG0000005005	--	Annotated_lncRNA	3632849	3642673	+	ENSSSCT00000000041	ENSSSCG00000000039	POLDIP3	polymerase (DNA-directed), delta interacting protein 3 [Source:HGNC Symbol;Acc:HGNC:23782]	3524038	3534832	+	98016	downstream
chr5	ALDBSSCT0000008244	ALDBSSCG0000005005	--	Annotated_lncRNA	3632849	3642673	+	ENSSSCT00000000040	ENSSSCG00000000038	CYB5R3	cytochrome b5 reductase 3 [Source:HGNC Symbol;Acc:HGNC:2873]	3610542	3628216	+	4632	downstream
chr5	ALDBSSCT0000008244	ALDBSSCG0000005005	--	Annotated_lncRNA	3632849	3642673	+	ENSSSCT00000028726	ENSSSCG00000026962	A4GALT	alpha 1,4-galactosyltransferase [Source:HGNC Symbol;Acc:HGNC:18149]	3561303	3562382	+	70466	downstream
chr6	ALDBSSCT0000008713	ALDBSSCG0000005316	--	Annotated_lncRNA	3490505	3492061	+	ENSSSCT00000002953	ENSSSCG00000002662	C16orf74	chromosome 16 open reading frame 74 [Source:HGNC Symbol;Acc:HGNC:23362]	3518411	3520079	+	26349	upstream
chr6	ALDBSSCT0000008713	ALDBSSCG0000005316	--	Annotated_lncRNA	3490505	3492061	+	ENSSSCT00000026569	ENSSSCG00000029403	EMC8	ER membrane protein complex subunit 8 [Source:HGNC Symbol;Acc:HGNC:7864]	3460332	3474618	+	15886	downstream
chr6	ALDBSSCT0000008713	ALDBSSCG0000005316	--	Annotated_lncRNA	3490505	3492061	+	ENSSSCT00000002955	ENSSSCG00000002664	GSE1	Gse1 coiled-coil protein [Source:HGNC Symbol;Acc:HGNC:28979]	3556829	3659803	-	64767	downstream
chr6	ALDBSSCT0000008713	ALDBSSCG0000005316	--	Annotated_lncRNA	3490505	3492061	+	ENSSSCT00000002954	ENSSSCG00000002663	GINS2	GINS complex subunit 2 (Psf2 homolog) [Source:HGNC Symbol;Acc:HGNC:24575]	3528008	3551972	+	35946	upstream
chr6	ALDBSSCT0000008713	ALDBSSCG0000005316	--	Annotated_lncRNA	3490505	3492061	+	ENSSSCT00000027946	ENSSSCG00000002664	GSE1	Gse1 coiled-coil protein [Source:HGNC Symbol;Acc:HGNC:28979]	3556829	3659803	-	64767	downstream
chr6	ALDBSSCT0000008713	ALDBSSCG0000005316	--	Annotated_lncRNA	3490505	3492061	+	ENSSSCT00000029520	ENSSSCG00000029034	COX4I1	cytochrome c oxidase subunit IV isoform 1 [Source:HGNC Symbol;Acc:HGNC:2265]	3453458	3459813	-	30691	upstream
chr5	ALDBSSCT0000008243	ALDBSSCG0000005004	--	Annotated_lncRNA	3509497	3518073	+	ENSSSCT00000000039	ENSSSCG00000000037	ARFGAP3	ADP ribosylation factor GTPase activating protein 3 [Source:HGNC Symbol;Acc:HGNC:661]	3367604	3498052	+	11444	downstream
chr5	ALDBSSCT0000008243	ALDBSSCG0000005004	--	Annotated_lncRNA	3509497	3518073	+	ENSSSCT00000028726	ENSSSCG00000026962	A4GALT	alpha 1,4-galactosyltransferase [Source:HGNC Symbol;Acc:HGNC:18149]	3561303	3562382	+	43229	upstream
chr5	ALDBSSCT0000008243	ALDBSSCG0000005004	--	Annotated_lncRNA	3509497	3518073	+	ENSSSCT00000000041	ENSSSCG00000000039	POLDIP3	polymerase (DNA-directed), delta interacting protein 3 [Source:HGNC Symbol;Acc:HGNC:23782]	3524038	3534832	+	5964	upstream
chr5	ALDBSSCT0000008243	ALDBSSCG0000005004	--	Annotated_lncRNA	3509497	3518073	+	ENSSSCT00000000040	ENSSSCG00000000038	CYB5R3	cytochrome b5 reductase 3 [Source:HGNC Symbol;Acc:HGNC:2873]	3610542	3628216	+	92468	upstream
chr3	ALDBSSCT0000006536	ALDBSSCG0000003996	--	Annotated_lncRNA	5383663	5410016	+	ENSSSCT00000008340	ENSSSCG00000007600	BHLHA15	basic helix-loop-helix family member a15 [Source:HGNC Symbol;Acc:HGNC:22265]	5470550	5471104	+	60533	upstream
chr3	ALDBSSCT0000006536	ALDBSSCG0000003996	--	Annotated_lncRNA	5383663	5410016	+	ENSSSCT00000008339	ENSSSCG00000007599	LMTK2	lemur tyrosine kinase 2 [Source:HGNC Symbol;Acc:HGNC:17880]	5427990	5468517	+	17973	upstream
chr3	ALDBSSCT0000006536	ALDBSSCG0000003996	--	Annotated_lncRNA	5383663	5410016	+	ENSSSCT00000008341	ENSSSCG00000007601	TECPR1	tectonin beta-propeller repeat containing 1 [Source:HGNC Symbol;Acc:HGNC:22214]	5474667	5500938	-	64650	downstream
chr3	ALDBSSCT0000006536	ALDBSSCG0000003996	--	Annotated_lncRNA	5383663	5410016	+	ENSSSCT00000008342	ENSSSCG00000007602	BAIAP2L1	BAI1-associated protein 2-like 1 [Source:HGNC Symbol;Acc:HGNC:21649]	5439927	5589075	-	29910	downstream
chr3	ALDBSSCT0000006536	ALDBSSCG0000003996	--	Annotated_lncRNA	5383663	5410016	+	ENSSSCT00000028320	ENSSSCG00000025940	--	--	5262052	5289335	-	94327	upstream
chr3	ALDBSSCT0000006536	ALDBSSCG0000003996	--	Annotated_lncRNA	5383663	5410016	+	ENSSSCT00000008336	ENSSSCG00000007596	--	--	5300977	5304404	-	79258	upstream
chr3	ALDBSSCT0000006534	ALDBSSCG0000003995	--	Annotated_lncRNA	4639765	4648885	+	ENSSSCT00000008322	ENSSSCG00000007583	--	--	4635661	4636587	-	3177	upstream
chr3	ALDBSSCT0000006534	ALDBSSCG0000003995	--	Annotated_lncRNA	4639765	4648885	+	ENSSSCT00000026431	ENSSSCG00000027807	FBXL18	F-box and leucine-rich repeat protein 18 [Source:HGNC Symbol;Acc:HGNC:21874]	4712389	4722083	-	63503	downstream
chr3	ALDBSSCT0000006534	ALDBSSCG0000003995	--	Annotated_lncRNA	4639765	4648885	+	ENSSSCT00000025333	ENSSSCG00000027768	SLC29A4	solute carrier family 29 (equilibrative nucleoside transporter), member 4 [Source:HGNC Symbol;Acc:HGNC:23097]	4537673	4541270	+	98494	downstream
chr3	ALDBSSCT0000006534	ALDBSSCG0000003995	--	Annotated_lncRNA	4639765	4648885	+	ENSSSCT00000025381	ENSSSCG00000022553	TNRC18	trinucleotide repeat containing 18 [Source:HGNC Symbol;Acc:HGNC:11962]	4569383	4614038	+	25726	downstream
chr3	ALDBSSCT0000006534	ALDBSSCG0000003995	--	Annotated_lncRNA	4639765	4648885	+	ENSSSCT00000008324	ENSSSCG00000007585	--	--	4729276	4732654	-	80390	downstream
chr3	ALDBSSCT0000006535	ALDBSSCG0000003995	--	Annotated_lncRNA	4639765	4652450	+	ENSSSCT00000008322	ENSSSCG00000007583	--	--	4635661	4636587	-	3177	upstream
chr3	ALDBSSCT0000006535	ALDBSSCG0000003995	--	Annotated_lncRNA	4639765	4652450	+	ENSSSCT00000026431	ENSSSCG00000027807	FBXL18	F-box and leucine-rich repeat protein 18 [Source:HGNC Symbol;Acc:HGNC:21874]	4712389	4722083	-	59938	downstream
chr3	ALDBSSCT0000006535	ALDBSSCG0000003995	--	Annotated_lncRNA	4639765	4652450	+	ENSSSCT00000025333	ENSSSCG00000027768	SLC29A4	solute carrier family 29 (equilibrative nucleoside transporter), member 4 [Source:HGNC Symbol;Acc:HGNC:23097]	4537673	4541270	+	98494	downstream
chr3	ALDBSSCT0000006535	ALDBSSCG0000003995	--	Annotated_lncRNA	4639765	4652450	+	ENSSSCT00000025381	ENSSSCG00000022553	TNRC18	trinucleotide repeat containing 18 [Source:HGNC Symbol;Acc:HGNC:11962]	4569383	4614038	+	25726	downstream
chr3	ALDBSSCT0000006535	ALDBSSCG0000003995	--	Annotated_lncRNA	4639765	4652450	+	ENSSSCT00000008324	ENSSSCG00000007585	--	--	4729276	4732654	-	76825	downstream
chr3	LNC_000488	XLOC_042238	--	Novel_lncRNA	59636076	59639106	-	ENSSSCT00000027145	ENSSSCG00000020750	--	--	59648030	59648796	+	8923	upstream
chr3	LNC_000488	XLOC_042238	--	Novel_lncRNA	59636076	59639106	-	ENSSSCT00000028512	ENSSSCG00000024746	--	--	59557949	59564578	+	71497	downstream
chr3	LNC_000488	XLOC_042238	--	Novel_lncRNA	59636076	59639106	-	ENSSSCT00000028139	ENSSSCG00000023617	--	--	59675079	59675847	+	35972	upstream
chr3	LNC_000489	XLOC_042238	--	Novel_lncRNA	59636076	59639106	-	ENSSSCT00000027145	ENSSSCG00000020750	--	--	59648030	59648796	+	8923	upstream
chr3	LNC_000489	XLOC_042238	--	Novel_lncRNA	59636076	59639106	-	ENSSSCT00000028512	ENSSSCG00000024746	--	--	59557949	59564578	+	71497	downstream
chr3	LNC_000489	XLOC_042238	--	Novel_lncRNA	59636076	59639106	-	ENSSSCT00000028139	ENSSSCG00000023617	--	--	59675079	59675847	+	35972	upstream
chr3	LNC_000486	XLOC_042029	--	Novel_lncRNA	43688274	43705151	-	ENSSSCT00000025658	ENSSSCG00000030204	--	--	43491538	43602320	-	85953	upstream
chr3	LNC_000486	XLOC_042029	--	Novel_lncRNA	43688274	43705151	-	ENSSSCT00000023261	ENSSSCG00000027166	--	--	43705200	43898052	+	48	upstream
chr3	LNC_000486	XLOC_042029	--	Novel_lncRNA	43688274	43705151	-	ENSSSCT00000008848	ENSSSCG00000008075	--	--	43631067	43647126	-	41147	upstream
chr3	LNC_000487	XLOC_042055	--	Novel_lncRNA	44394727	44397963	-	ENSSSCT00000008852	ENSSSCG00000008079	FAM120A	family with sequence similarity 120A [Source:HGNC Symbol;Acc:HGNC:13247]	44241917	44330948	+	63778	downstream
chr3	LNC_000487	XLOC_042055	--	Novel_lncRNA	44394727	44397963	-	ENSSSCT00000008853	ENSSSCG00000008080	PHF2	PHD finger protein 2 [Source:HGNC Symbol;Acc:HGNC:8920]	44404270	44434191	+	6306	upstream
chr3	LNC_000484	XLOC_041831	--	Novel_lncRNA	32130240	32134616	-	ENSSSCT00000008643	ENSSSCG00000007888	TNFRSF17	tumor necrosis factor receptor superfamily member 17 [Source:HGNC Symbol;Acc:HGNC:11913]	32126183	32130379	+	-140	antisense
chr3	LNC_000484	XLOC_041831	--	Novel_lncRNA	32130240	32134616	-	ENSSSCT00000033868	ENSSSCG00000007888	TNFRSF17	tumor necrosis factor receptor superfamily member 17 [Source:HGNC Symbol;Acc:HGNC:11913]	32126206	32130324	+	-85	antisense
chr3	LNC_000484	XLOC_041831	--	Novel_lncRNA	32130240	32134616	-	ENSSSCT00000031677	ENSSSCG00000007888	TNFRSF17	tumor necrosis factor receptor superfamily member 17 [Source:HGNC Symbol;Acc:HGNC:11913]	32126190	32130214	+	25	downstream
chr3	LNC_000484	XLOC_041831	--	Novel_lncRNA	32130240	32134616	-	ENSSSCT00000036463	ENSSSCG00000007888	TNFRSF17	tumor necrosis factor receptor superfamily member 17 [Source:HGNC Symbol;Acc:HGNC:11913]	32127021	32130374	+	-135	antisense
chr3	LNC_000485	XLOC_042029	--	Novel_lncRNA	43677909	43705151	-	ENSSSCT00000025658	ENSSSCG00000030204	--	--	43491538	43602320	-	75588	upstream
chr3	LNC_000485	XLOC_042029	--	Novel_lncRNA	43677909	43705151	-	ENSSSCT00000023261	ENSSSCG00000027166	--	--	43705200	43898052	+	48	upstream
chr3	LNC_000485	XLOC_042029	--	Novel_lncRNA	43677909	43705151	-	ENSSSCT00000008848	ENSSSCG00000008075	--	--	43631067	43647126	-	30782	upstream
chr3	LNC_000482	XLOC_041482	--	Novel_lncRNA	7924660	7925949	-	ENSSSCT00000008413	ENSSSCG00000007673	EPO	Erythropoietin [Source:UniProtKB/Swiss-Prot;Acc:P49157]	8014859	8017287	+	88909	upstream
chr3	LNC_000482	XLOC_041482	--	Novel_lncRNA	7924660	7925949	-	ENSSSCT00000031465	ENSSSCG00000025096	FBXO24	F-box protein 24 [Source:HGNC Symbol;Acc:HGNC:13595]	7908385	7916953	+	7706	downstream
chr3	LNC_000482	XLOC_041482	--	Novel_lncRNA	7924660	7925949	-	ENSSSCT00000025262	ENSSSCG00000025096	FBXO24	F-box protein 24 [Source:HGNC Symbol;Acc:HGNC:13595]	7906563	7916953	+	7706	downstream
chr3	LNC_000482	XLOC_041482	--	Novel_lncRNA	7924660	7925949	-	ENSSSCT00000008410	ENSSSCG00000007670	ACTL6B	actin like 6B [Source:HGNC Symbol;Acc:HGNC:160]	7949444	7963656	-	23494	downstream
chr3	LNC_000482	XLOC_041482	--	Novel_lncRNA	7924660	7925949	-	ENSSSCT00000026611	ENSSSCG00000023255	MOSPD3	motile sperm domain containing 3 [Source:HGNC Symbol;Acc:HGNC:25078]	7926002	7928776	+	52	upstream
chr3	LNC_000482	XLOC_041482	--	Novel_lncRNA	7924660	7925949	-	ENSSSCT00000025244	ENSSSCG00000021890	--	--	7974103	7979030	+	48153	upstream
chr3	LNC_000482	XLOC_041482	--	Novel_lncRNA	7924660	7925949	-	ENSSSCT00000029137	ENSSSCG00000027466	PCOLCE	procollagen C-endopeptidase enhancer [Source:HGNC Symbol;Acc:HGNC:8738]	7918398	7923583	+	1076	downstream
chr3	LNC_000482	XLOC_041482	--	Novel_lncRNA	7924660	7925949	-	ENSSSCT00000008408	ENSSSCG00000007668	--	--	7981982	7988931	-	56032	downstream
chr3	LNC_000482	XLOC_041482	--	Novel_lncRNA	7924660	7925949	-	ENSSSCT00000008407	ENSSSCG00000007667	LRCH4	leucine-rich repeats and calponin homology (CH) domain containing 4 [Source:HGNC Symbol;Acc:HGNC:6691]	7843516	7906079	-	18580	upstream
chr3	LNC_000482	XLOC_041482	--	Novel_lncRNA	7924660	7925949	-	ENSSSCT00000008411	ENSSSCG00000007671	TFR2	transferrin receptor 2 [Source:HGNC Symbol;Acc:HGNC:11762]	7934750	7948981	-	8800	downstream
chr3	LNC_000482	XLOC_041482	--	Novel_lncRNA	7924660	7925949	-	ENSSSCT00000008405	ENSSSCG00000007665	--	--	7837929	7839602	+	85057	downstream
chr3	LNC_000482	XLOC_041482	--	Novel_lncRNA	7924660	7925949	-	ENSSSCT00000008404	ENSSSCG00000007664	AGFG2	ArfGAP with FG repeats 2 [Source:HGNC Symbol;Acc:HGNC:5177]	7811252	7833017	+	91642	downstream
chr3	LNC_000482	XLOC_041482	--	Novel_lncRNA	7924660	7925949	-	ENSSSCT00000008412	ENSSSCG00000007672	POP7	POP7 homolog, ribonuclease P/MRP subunit [Source:HGNC Symbol;Acc:HGNC:19949]	8002633	8003480	+	76683	upstream
chr3	LNC_000483	XLOC_041831	--	Novel_lncRNA	32125505	32134616	-	ENSSSCT00000008643	ENSSSCG00000007888	TNFRSF17	tumor necrosis factor receptor superfamily member 17 [Source:HGNC Symbol;Acc:HGNC:11913]	32126183	32130379	+	-4197	antisense
chr3	LNC_000483	XLOC_041831	--	Novel_lncRNA	32125505	32134616	-	ENSSSCT00000033868	ENSSSCG00000007888	TNFRSF17	tumor necrosis factor receptor superfamily member 17 [Source:HGNC Symbol;Acc:HGNC:11913]	32126206	32130324	+	-4119	antisense
chr3	LNC_000483	XLOC_041831	--	Novel_lncRNA	32125505	32134616	-	ENSSSCT00000036463	ENSSSCG00000007888	TNFRSF17	tumor necrosis factor receptor superfamily member 17 [Source:HGNC Symbol;Acc:HGNC:11913]	32127021	32130374	+	-3354	antisense
chr3	LNC_000483	XLOC_041831	--	Novel_lncRNA	32125505	32134616	-	ENSSSCT00000031677	ENSSSCG00000007888	TNFRSF17	tumor necrosis factor receptor superfamily member 17 [Source:HGNC Symbol;Acc:HGNC:11913]	32126190	32130214	+	-4025	antisense
chr3	LNC_000480	XLOC_041332	--	Novel_lncRNA	134754845	134756953	+	ENSSSCT00000009447	ENSSSCG00000008635	NOL10	nucleolar protein 10 [Source:HGNC Symbol;Acc:HGNC:25862]	134629253	134722996	+	31848	downstream
chr3	LNC_000481	XLOC_041440	--	Novel_lncRNA	5330720	5342907	-	ENSSSCT00000008339	ENSSSCG00000007599	LMTK2	lemur tyrosine kinase 2 [Source:HGNC Symbol;Acc:HGNC:17880]	5427990	5468517	+	85082	upstream
chr3	LNC_000481	XLOC_041440	--	Novel_lncRNA	5330720	5342907	-	ENSSSCT00000008336	ENSSSCG00000007596	--	--	5300977	5304404	-	26315	upstream
chr3	LNC_000481	XLOC_041440	--	Novel_lncRNA	5330720	5342907	-	ENSSSCT00000028320	ENSSSCG00000025940	--	--	5262052	5289335	-	41384	upstream
chr3	LNC_000481	XLOC_041440	--	Novel_lncRNA	5330720	5342907	-	ENSSSCT00000008342	ENSSSCG00000007602	BAIAP2L1	BAI1-associated protein 2-like 1 [Source:HGNC Symbol;Acc:HGNC:21649]	5439927	5589075	-	97019	downstream
chr3	LNC_000481	XLOC_041440	--	Novel_lncRNA	5330720	5342907	-	ENSSSCT00000008329	ENSSSCG00000007589	--	--	5209362	5259886	+	70833	downstream
chr13	ALDBSSCT0000002627	ALDBSSCG0000001599	--	Annotated_lncRNA	37891687	37901101	+	ENSSSCT00000012523	ENSSSCG00000011443	STAB1	stabilin 1 [Source:HGNC Symbol;Acc:HGNC:18628]	37846302	37873056	+	18630	downstream
chr13	ALDBSSCT0000002627	ALDBSSCG0000001599	--	Annotated_lncRNA	37891687	37901101	+	ENSSSCT00000012522	ENSSSCG00000011442	NISCH	nischarin [Source:HGNC Symbol;Acc:HGNC:18006]	37809488	37844066	+	47620	downstream
chr13	ALDBSSCT0000002627	ALDBSSCG0000001599	--	Annotated_lncRNA	37891687	37901101	+	ENSSSCT00000012521	ENSSSCG00000011441	TNNC1	Troponin C, slow skeletal and cardiac muscles [Source:UniProtKB/Swiss-Prot;Acc:P63317]	37805313	37808062	-	83624	upstream
chr13	ALDBSSCT0000002627	ALDBSSCG0000001599	--	Annotated_lncRNA	37891687	37901101	+	ENSSSCT00000012520	ENSSSCG00000011440	SEMA3G	sema domain, immunoglobulin domain (Ig), short basic domain, secreted, (semaphorin) 3G [Source:HGNC Symbol;Acc:HGNC:30400]	37790286	37799336	-	92350	upstream
chr13	ALDBSSCT0000002627	ALDBSSCG0000001599	--	Annotated_lncRNA	37891687	37901101	+	ENSSSCT00000012524	ENSSSCG00000011444	NT5DC2	5'-nucleotidase domain containing 2 [Source:HGNC Symbol;Acc:HGNC:25717]	37868518	37876779	-	14907	upstream
chr13	ALDBSSCT0000002623	ALDBSSCG0000001595	--	Annotated_lncRNA	36881156	36886431	+	ENSSSCT00000012501	ENSSSCG00000011421	MANF	mesencephalic astrocyte-derived neurotrophic factor [Source:HGNC Symbol;Acc:HGNC:15461]	36895068	36899306	-	8636	downstream
chr13	ALDBSSCT0000002623	ALDBSSCG0000001595	--	Annotated_lncRNA	36881156	36886431	+	ENSSSCT00000012496	ENSSSCG00000011416	DOCK3	dedicator of cytokinesis 3 [Source:HGNC Symbol;Acc:HGNC:2989]	36607823	36847319	+	33836	downstream
chr13	ALDBSSCT0000002623	ALDBSSCG0000001595	--	Annotated_lncRNA	36881156	36886431	+	ENSSSCT00000012502	ENSSSCG00000011422	--	--	36981665	37073769	+	95233	upstream
chr13	ALDBSSCT0000002623	ALDBSSCG0000001595	--	Annotated_lncRNA	36881156	36886431	+	ENSSSCT00000012497	ENSSSCG00000011417	VPRBP	Vpr (HIV-1) binding protein [Source:HGNC Symbol;Acc:HGNC:30911]	36900717	36961167	-	14285	downstream
chr13	ALDBSSCT0000002623	ALDBSSCG0000001595	--	Annotated_lncRNA	36881156	36886431	+	ENSSSCT00000012500	ENSSSCG00000011420	RBM15B	RNA binding motif protein 15B [Source:HGNC Symbol;Acc:HGNC:24303]	36890397	36893078	-	3965	downstream
chr13	ALDBSSCT0000002620	ALDBSSCG0000001593	--	Annotated_lncRNA	35883429	35885697	+	ENSSSCT00000029394	ENSSSCG00000024363	IFRD2	interferon-related developmental regulator 2 [Source:HGNC Symbol;Acc:HGNC:5457]	35932516	35968835	-	46818	downstream
chr13	ALDBSSCT0000002620	ALDBSSCG0000001593	--	Annotated_lncRNA	35883429	35885697	+	ENSSSCT00000012481	ENSSSCG00000011402	HYAL3	hyaluronoglucosaminidase 3 [Source:HGNC Symbol;Acc:HGNC:5322]	35969382	35975447	-	83684	downstream
chr13	ALDBSSCT0000002620	ALDBSSCG0000001593	--	Annotated_lncRNA	35883429	35885697	+	ENSSSCT00000031793	ENSSSCG00000024609	GNAT1	guanine nucleotide binding protein (G protein), alpha transducing activity polypeptide 1 [Source:HGNC Symbol;Acc:HGNC:4393]	35852148	35855393	+	28035	downstream
chr13	ALDBSSCT0000002620	ALDBSSCG0000001593	--	Annotated_lncRNA	35883429	35885697	+	ENSSSCT00000012473	ENSSSCG00000011395	RBM5	RNA binding motif protein 5 [Source:HGNC Symbol;Acc:HGNC:9902]	35759800	35791864	+	91564	downstream
chr13	ALDBSSCT0000002620	ALDBSSCG0000001593	--	Annotated_lncRNA	35883429	35885697	+	ENSSSCT00000012475	ENSSSCG00000011397	SLC38A3	solute carrier family 38 member 3 [Source:HGNC Symbol;Acc:HGNC:18044]	35863386	35878405	+	5023	downstream
chr13	ALDBSSCT0000002620	ALDBSSCG0000001593	--	Annotated_lncRNA	35883429	35885697	+	ENSSSCT00000012477	ENSSSCG00000011399	GNAI2	guanine nucleotide binding protein (G protein), alpha inhibiting activity polypeptide 2 [Source:HGNC Symbol;Acc:HGNC:4385]	35891302	35911741	+	5604	upstream
chr13	ALDBSSCT0000002620	ALDBSSCG0000001593	--	Annotated_lncRNA	35883429	35885697	+	ENSSSCT00000012476	ENSSSCG00000011398	SEMA3F	sema domain, immunoglobulin domain (Ig), short basic domain, secreted, (semaphorin) 3F [Source:HGNC Symbol;Acc:HGNC:10728]	35820305	35849844	+	33584	downstream
chr13	ALDBSSCT0000002620	ALDBSSCG0000001593	--	Annotated_lncRNA	35883429	35885697	+	ENSSSCT00000012480	ENSSSCG00000011401	LSMEM2	leucine-rich single-pass membrane protein 2 [Source:HGNC Symbol;Acc:HGNC:26781]	35933297	35934707	+	47599	upstream
chr13	ALDBSSCT0000002620	ALDBSSCG0000001593	--	Annotated_lncRNA	35883429	35885697	+	ENSSSCT00000012478	ENSSSCG00000011400	SEMA3B	sema domain, immunoglobulin domain (Ig), short basic domain, secreted, (semaphorin) 3B [Source:HGNC Symbol;Acc:HGNC:10724]	35921157	35928150	+	35459	upstream
chr13	ALDBSSCT0000002620	ALDBSSCG0000001593	--	Annotated_lncRNA	35883429	35885697	+	ENSSSCT00000012482	ENSSSCG00000011403	NAT6	N-acetyltransferase 6 (GCN5-related) [Source:HGNC Symbol;Acc:HGNC:30252]	35972110	35975453	-	86412	downstream
chr13	ALDBSSCT0000002620	ALDBSSCG0000001593	--	Annotated_lncRNA	35883429	35885697	+	ENSSSCT00000012484	ENSSSCG00000011404	HYAL1	hyaluronidase-1 precursor [Source:RefSeq peptide;Acc:NP_999606]	35976670	35978688	-	90972	downstream
chr13	ALDBSSCT0000002620	ALDBSSCG0000001593	--	Annotated_lncRNA	35883429	35885697	+	ENSSSCT00000012485	ENSSSCG00000011405	HYAL2	hyaluronoglucosaminidase 2 [Source:HGNC Symbol;Acc:HGNC:5321]	35983756	35988621	-	98058	downstream
chr13	ALDBSSCT0000002621	ALDBSSCG0000001594	--	Annotated_lncRNA	36383852	36387685	+	ENSSSCT00000033558	ENSSSCG00000011414	CISH	cytokine inducible SH2-containing protein [Source:HGNC Symbol;Acc:HGNC:1984]	36354907	36358941	+	24910	downstream
chr13	ALDBSSCT0000002621	ALDBSSCG0000001594	--	Annotated_lncRNA	36383852	36387685	+	ENSSSCT00000012495	ENSSSCG00000011415	MAPKAPK3	mitogen-activated protein kinase-activated protein kinase 3 [Source:HGNC Symbol;Acc:HGNC:6888]	36318916	36348276	-	35575	upstream
chr13	ALDBSSCT0000002621	ALDBSSCG0000001594	--	Annotated_lncRNA	36383852	36387685	+	ENSSSCT00000012494	ENSSSCG00000011414	CISH	cytokine inducible SH2-containing protein [Source:HGNC Symbol;Acc:HGNC:1984]	36354904	36358940	+	24911	downstream
chr8	LNC_000644	XLOC_058608	--	Novel_lncRNA	41137470	41159457	-	ENSSSCT00000009664	ENSSSCG00000008830	CWH43	cell wall biogenesis 43 C-terminal homolog [Source:HGNC Symbol;Acc:HGNC:26133]	41045873	41120417	+	17052	downstream
chr8	LNC_000644	XLOC_058608	--	Novel_lncRNA	41137470	41159457	-	ENSSSCT00000009666	ENSSSCG00000008831	DCUN1D4	DCN1, defective in cullin neddylation 1, domain containing 4 [Source:HGNC Symbol;Acc:HGNC:28998]	41159617	41236217	+	159	upstream
chr8	LNC_000645	XLOC_058612	--	Novel_lncRNA	41576829	41609745	-	ENSSSCT00000030149	ENSSSCG00000028733	USP46	ubiquitin specific peptidase 46 [Source:HGNC Symbol;Acc:HGNC:20075]	41642080	41677119	-	32334	downstream
chr8	LNC_000645	XLOC_058612	--	Novel_lncRNA	41576829	41609745	-	ENSSSCT00000025593	ENSSSCG00000021623	--	--	41686739	41687328	+	76993	upstream
chr15	ALDBSSCT0000004590	ALDBSSCG0000002792	--	Annotated_lncRNA	122882410	122883897	-	ENSSSCT00000017576	ENSSSCG00000028368	CRYGB	crystallin gamma B [Source:HGNC Symbol;Acc:HGNC:2409]	122786646	122788402	-	94007	upstream
chr15	ALDBSSCT0000004590	ALDBSSCG0000002792	--	Annotated_lncRNA	122882410	122883897	-	ENSSSCT00000017580	ENSSSCG00000016147	PIKFYVE	phosphoinositide kinase, FYVE finger containing [Source:HGNC Symbol;Acc:HGNC:23785]	122898747	122992226	+	14849	upstream
chr15	ALDBSSCT0000004590	ALDBSSCG0000002792	--	Annotated_lncRNA	122882410	122883897	-	ENSSSCT00000026412	ENSSSCG00000023264	IDH1	isocitrate dehydrogenase 1 (NADP+) [Source:HGNC Symbol;Acc:HGNC:5382]	122861672	122879852	-	2557	upstream
chr15	ALDBSSCT0000004590	ALDBSSCG0000002792	--	Annotated_lncRNA	122882410	122883897	-	ENSSSCT00000017579	ENSSSCG00000016146	C2orf80	chromosome 2 open reading frame 80 [Source:HGNC Symbol;Acc:HGNC:34352]	122804201	122823136	-	59273	upstream
chr6	ALDBSSCT0000008885	ALDBSSCG0000005431	--	Annotated_lncRNA	57187590	57192986	+	ENSSSCT00000004415	ENSSSCG00000003993	--	--	57126235	57170271	+	17318	downstream
chr6	ALDBSSCT0000008885	ALDBSSCG0000005431	--	Annotated_lncRNA	57187590	57192986	+	ENSSSCT00000004416	ENSSSCG00000003994	C19orf18	chromosome 19 open reading frame 18 [Source:HGNC Symbol;Acc:HGNC:28642]	57272176	57281258	-	79189	downstream
chr6	ALDBSSCT0000008885	ALDBSSCG0000005431	--	Annotated_lncRNA	57187590	57192986	+	ENSSSCT00000004418	ENSSSCG00000003995	ZNF606	zinc finger protein 606 [Source:HGNC Symbol;Acc:HGNC:25879]	57292699	57314691	-	99712	downstream
chr6	ALDBSSCT0000008885	ALDBSSCG0000005431	--	Annotated_lncRNA	57187590	57192986	+	ENSSSCT00000004411	ENSSSCG00000003989	--	--	57195271	57211183	+	2284	upstream
chr6	ALDBSSCT0000008885	ALDBSSCG0000005431	--	Annotated_lncRNA	57187590	57192986	+	ENSSSCT00000004412	ENSSSCG00000003990	ZNF671	zinc finger protein 671 [Source:HGNC Symbol;Acc:HGNC:26279]	57102604	57106521	+	81068	downstream
chr3	ALDBSSCT0000007002	ALDBSSCG0000004255	--	Annotated_lncRNA	6629750	6639048	-	ENSSSCT00000024950	ENSSSCG00000023257	PDAP1	PDGFA associated protein 1 [Source:HGNC Symbol;Acc:HGNC:14634]	6699604	6713375	+	60555	upstream
chr3	ALDBSSCT0000007002	ALDBSSCG0000004255	--	Annotated_lncRNA	6629750	6639048	-	ENSSSCT00000030708	ENSSSCG00000022023	ZKSCAN5	zinc finger with KRAB and SCAN domains 5 [Source:HGNC Symbol;Acc:HGNC:12867]	6588959	6611396	-	18353	upstream
chr3	ALDBSSCT0000007002	ALDBSSCG0000004255	--	Annotated_lncRNA	6629750	6639048	-	ENSSSCT00000008362	ENSSSCG00000007622	--	--	6683311	6697333	+	44262	upstream
chr3	ALDBSSCT0000007002	ALDBSSCG0000004255	--	Annotated_lncRNA	6629750	6639048	-	ENSSSCT00000008363	ENSSSCG00000007623	BUD31	BUD31 homolog [Source:HGNC Symbol;Acc:HGNC:29629]	6693615	6699273	-	54566	downstream
chr3	ALDBSSCT0000007002	ALDBSSCG0000004255	--	Annotated_lncRNA	6629750	6639048	-	ENSSSCT00000008358	ENSSSCG00000007618	ZNF789	zinc finger protein 789 [Source:HGNC Symbol;Acc:HGNC:27801]	6577306	6623651	+	6098	downstream
chr3	ALDBSSCT0000007002	ALDBSSCG0000004255	--	Annotated_lncRNA	6629750	6639048	-	ENSSSCT00000008352	ENSSSCG00000007623	BUD31	BUD31 homolog [Source:HGNC Symbol;Acc:HGNC:29629]	6693615	6699273	-	54566	downstream
chr3	ALDBSSCT0000007002	ALDBSSCG0000004255	--	Annotated_lncRNA	6629750	6639048	-	ENSSSCT00000030995	ENSSSCG00000029175	FAM200A	family with sequence similarity 200 member A [Source:HGNC Symbol;Acc:HGNC:25401]	6558454	6560175	+	69574	downstream
chr3	ALDBSSCT0000007002	ALDBSSCG0000004255	--	Annotated_lncRNA	6629750	6639048	-	ENSSSCT00000008357	ENSSSCG00000007617	ZNF655	zinc finger protein 655 [Source:HGNC Symbol;Acc:HGNC:30899]	6534854	6548970	-	80779	upstream
chr3	ALDBSSCT0000007002	ALDBSSCG0000004255	--	Annotated_lncRNA	6629750	6639048	-	ENSSSCT00000008355	ENSSSCG00000007615	--	--	6665517	6679279	-	26468	downstream
chr3	ALDBSSCT0000007002	ALDBSSCG0000004255	--	Annotated_lncRNA	6629750	6639048	-	ENSSSCT00000008354	ENSSSCG00000027156	-	ATP synthase subunit f, mitochondrial [Source:RefSeq peptide;Acc:NP_001090933]	6662427	6663981	+	23378	upstream
chr6	ALDBSSCT0000008862	ALDBSSCG0000005416	--	Annotated_lncRNA	51770940	51771954	+	ENSSSCT00000003590	ENSSSCG00000003231	NKG7	natural killer cell granule protein 7 [Source:HGNC Symbol;Acc:HGNC:7830]	51692516	51694254	-	76685	upstream
chr6	ALDBSSCT0000008862	ALDBSSCG0000005416	--	Annotated_lncRNA	51770940	51771954	+	ENSSSCT00000003591	ENSSSCG00000003232	LIM2	lens intrinsic membrane protein 2 [Source:HGNC Symbol;Acc:HGNC:6610]	51701355	51707598	-	63341	upstream
chr6	ALDBSSCT0000008862	ALDBSSCG0000005416	--	Annotated_lncRNA	51770940	51771954	+	ENSSSCT00000003592	ENSSSCG00000003233	ZNF175	zinc finger protein 175 [Source:HGNC Symbol;Acc:HGNC:12964]	51772965	51781467	+	1010	upstream
chr6	ALDBSSCT0000008862	ALDBSSCG0000005416	--	Annotated_lncRNA	51770940	51771954	+	ENSSSCT00000003593	ENSSSCG00000003234	--	--	51783772	51789236	-	11817	downstream
chr6	ALDBSSCT0000008862	ALDBSSCG0000005416	--	Annotated_lncRNA	51770940	51771954	+	ENSSSCT00000003594	ENSSSCG00000003235	CTU1	cytosolic thiouridylase subunit 1 [Source:HGNC Symbol;Acc:HGNC:29590]	51794581	51798403	+	22626	upstream
chr6	ALDBSSCT0000008862	ALDBSSCG0000005416	--	Annotated_lncRNA	51770940	51771954	+	ENSSSCT00000003595	ENSSSCG00000003236	SIGLEC5	-	51805504	51825376	-	33549	downstream
chr6	ALDBSSCT0000008862	ALDBSSCG0000005416	--	Annotated_lncRNA	51770940	51771954	+	ENSSSCT00000003596	ENSSSCG00000003238	--	--	51859123	51867873	+	87168	upstream
chr6	ALDBSSCT0000008862	ALDBSSCG0000005416	--	Annotated_lncRNA	51770940	51771954	+	ENSSSCT00000003597	ENSSSCG00000003238	--	--	51859123	51868585	+	87168	upstream
chr6	ALDBSSCT0000008862	ALDBSSCG0000005416	--	Annotated_lncRNA	51770940	51771954	+	ENSSSCT00000032460	ENSSSCG00000022906	CH242-204P3.4	-	51715382	51723144	-	47795	upstream
chr6	ALDBSSCT0000008862	ALDBSSCG0000005416	--	Annotated_lncRNA	51770940	51771954	+	ENSSSCT00000035046	ENSSSCG00000003229	ETFB	electron-transfer-flavoprotein, beta polypeptide [Source:HGNC Symbol;Acc:HGNC:3482]	51672759	51688479	-	82460	upstream
chr6	ALDBSSCT0000008862	ALDBSSCG0000005416	--	Annotated_lncRNA	51770940	51771954	+	ENSSSCT00000034956	ENSSSCG00000022906	CH242-204P3.4	-	51715382	51718290	-	52649	upstream
chr6	ALDBSSCT0000008862	ALDBSSCG0000005416	--	Annotated_lncRNA	51770940	51771954	+	ENSSSCT00000003589	ENSSSCG00000003230	CLDND2	claudin domain containing 2 [Source:HGNC Symbol;Acc:HGNC:28511]	51689202	51690637	-	80302	upstream
chr6	ALDBSSCT0000008862	ALDBSSCG0000005416	--	Annotated_lncRNA	51770940	51771954	+	ENSSSCT00000003588	ENSSSCG00000003229	ETFB	electron-transfer-flavoprotein, beta polypeptide [Source:HGNC Symbol;Acc:HGNC:3482]	51672742	51688397	-	82542	upstream
chr6	ALDBSSCT0000008862	ALDBSSCG0000005416	--	Annotated_lncRNA	51770940	51771954	+	ENSSSCT00000036125	ENSSSCG00000003231	NKG7	natural killer cell granule protein 7 [Source:HGNC Symbol;Acc:HGNC:7830]	51692990	51694187	-	76752	upstream
chr6	ALDBSSCT0000008862	ALDBSSCG0000005416	--	Annotated_lncRNA	51770940	51771954	+	ENSSSCT00000035955	ENSSSCG00000003231	NKG7	natural killer cell granule protein 7 [Source:HGNC Symbol;Acc:HGNC:7830]	51692599	51695384	-	75555	upstream
chr6	ALDBSSCT0000008862	ALDBSSCG0000005416	--	Annotated_lncRNA	51770940	51771954	+	ENSSSCT00000034842	ENSSSCG00000003231	NKG7	natural killer cell granule protein 7 [Source:HGNC Symbol;Acc:HGNC:7830]	51692863	51694182	-	76757	upstream
chr6	ALDBSSCT0000008862	ALDBSSCG0000005416	--	Annotated_lncRNA	51770940	51771954	+	ENSSSCT00000032413	ENSSSCG00000024518	--	--	51831633	51835159	-	59678	downstream
chr6	ALDBSSCT0000008862	ALDBSSCG0000005416	--	Annotated_lncRNA	51770940	51771954	+	ENSSSCT00000034058	ENSSSCG00000022906	CH242-204P3.4	-	51715388	51723174	-	47765	upstream
chr3	ALDBSSCT0000007171	ALDBSSCG0000004358	--	Annotated_lncRNA	54764201	54821564	-	ENSSSCT00000032991	ENSSSCG00000008162	IL1R1	interleukin 1 receptor, type I [Source:HGNC Symbol;Acc:HGNC:5993]	54745413	54757579	-	6621	upstream
chr3	ALDBSSCT0000007171	ALDBSSCG0000004358	--	Annotated_lncRNA	54764201	54821564	-	ENSSSCT00000008939	ENSSSCG00000008162	IL1R1	interleukin 1 receptor, type I [Source:HGNC Symbol;Acc:HGNC:5993]	54729098	54758580	-	5620	upstream
chr3	ALDBSSCT0000007171	ALDBSSCG0000004358	--	Annotated_lncRNA	54764201	54821564	-	ENSSSCT00000030337	ENSSSCG00000028331	IL1R2	interleukin-1 receptor type 2 precursor [Source:RefSeq peptide;Acc:NP_001230292]	54901371	54919900	-	79806	downstream
chr12	ALDBSSCT0000002539	ALDBSSCG0000001537	--	Annotated_lncRNA	62737412	62747740	-	ENSSSCT00000019639	ENSSSCG00000018044	ALDH3A1	aldehyde dehydrogenase 3 family member A1 [Source:HGNC Symbol;Acc:HGNC:405]	62638752	62645604	-	91807	upstream
chr12	ALDBSSCT0000002539	ALDBSSCG0000001537	--	Annotated_lncRNA	62737412	62747740	-	ENSSSCT00000034408	ENSSSCG00000018045	--	--	62668831	62673901	-	63510	upstream
chr12	ALDBSSCT0000002539	ALDBSSCG0000001537	--	Annotated_lncRNA	62737412	62747740	-	ENSSSCT00000019641	ENSSSCG00000018046	--	--	62686585	62728885	+	8526	downstream
chr12	ALDBSSCT0000002539	ALDBSSCG0000001537	--	Annotated_lncRNA	62737412	62747740	-	ENSSSCT00000019640	ENSSSCG00000018045	--	--	62669086	62683116	-	54295	upstream
chr12	ALDBSSCT0000002539	ALDBSSCG0000001537	--	Annotated_lncRNA	62737412	62747740	-	ENSSSCT00000019645	ENSSSCG00000018050	--	--	62817470	62822844	+	69729	upstream
chr12	ALDBSSCT0000002539	ALDBSSCG0000001537	--	Annotated_lncRNA	62737412	62747740	-	ENSSSCT00000035940	ENSSSCG00000018045	--	--	62666981	62683150	-	54261	upstream
chr18	ALDBSSCT0000005662	ALDBSSCG0000003435	--	Annotated_lncRNA	20231663	20260530	-	ENSSSCT00000024955	ENSSSCG00000025967	SMKR1	small lysine-rich protein 1 [Source:HGNC Symbol;Acc:HGNC:43561]	20261130	20270358	-	599	downstream
chr18	ALDBSSCT0000005662	ALDBSSCG0000003435	--	Annotated_lncRNA	20231663	20260530	-	ENSSSCT00000018038	ENSSSCG00000016568	AHCYL2	adenosylhomocysteinase-like 2 [Source:HGNC Symbol;Acc:HGNC:22204]	20333818	20511321	-	73287	downstream
chr18	ALDBSSCT0000005662	ALDBSSCG0000003435	--	Annotated_lncRNA	20231663	20260530	-	ENSSSCT00000018037	ENSSSCG00000016567	STRIP2	striatin interacting protein 2 [Source:HGNC Symbol;Acc:HGNC:22209]	20279718	20326503	-	19187	downstream
chr12	ALDBSSCT0000002532	ALDBSSCG0000001531	--	Annotated_lncRNA	61928788	61940041	-	ENSSSCT00000019621	ENSSSCG00000018026	--	--	61886697	61893453	+	35334	downstream
chr12	ALDBSSCT0000002532	ALDBSSCG0000001531	--	Annotated_lncRNA	61928788	61940041	-	ENSSSCT00000019623	ENSSSCG00000018028	TEKT3	tektin 3 [Source:HGNC Symbol;Acc:HGNC:14293]	62017060	62047473	+	77018	upstream
chr12	ALDBSSCT0000002532	ALDBSSCG0000001531	--	Annotated_lncRNA	61928788	61940041	-	ENSSSCT00000019622	ENSSSCG00000018027	TVP23B	Sus scrofa Golgi apparatus membrane protein TVP23 homolog B (TVP23B), mRNA. [Source:RefSeq mRNA;Acc:NM_001281832]	61898102	61907741	+	21046	downstream
chr6	ALDBSSCT0000008868	ALDBSSCG0000005418	--	Annotated_lncRNA	51947964	51953151	+	ENSSSCT00000003604	ENSSSCG00000003244	--	--	51959390	51992422	-	6238	downstream
chr6	ALDBSSCT0000008868	ALDBSSCG0000005418	--	Annotated_lncRNA	51947964	51953151	+	ENSSSCT00000003596	ENSSSCG00000003238	--	--	51859123	51867873	+	80090	downstream
chr6	ALDBSSCT0000008868	ALDBSSCG0000005418	--	Annotated_lncRNA	51947964	51953151	+	ENSSSCT00000003603	ENSSSCG00000003243	--	--	52011706	52051380	+	58554	upstream
chr6	ALDBSSCT0000008868	ALDBSSCG0000005418	--	Annotated_lncRNA	51947964	51953151	+	ENSSSCT00000003598	ENSSSCG00000003239	HAS1	hyaluronan synthase 1 [Source:HGNC Symbol;Acc:HGNC:4818]	51877028	51883413	-	64550	upstream
chr6	ALDBSSCT0000008868	ALDBSSCG0000005418	--	Annotated_lncRNA	51947964	51953151	+	ENSSSCT00000003599	ENSSSCG00000003240	--	--	51907469	51911185	-	36778	upstream
chr6	ALDBSSCT0000008868	ALDBSSCG0000005418	--	Annotated_lncRNA	51947964	51953151	+	ENSSSCT00000003597	ENSSSCG00000003238	--	--	51859123	51868585	+	79378	downstream
chr17	LNC_000392	XLOC_032821	--	Novel_lncRNA	41111755	41115424	+	ENSSSCT00000007934	ENSSSCG00000007251	COMMD7	COMM domain containing 7 [Source:HGNC Symbol;Acc:HGNC:16223]	41092439	41095299	+	16455	downstream
chr17	LNC_000392	XLOC_032821	--	Novel_lncRNA	41111755	41115424	+	ENSSSCT00000007932	ENSSSCG00000007250	--	--	41183254	41198099	-	67829	downstream
chr17	LNC_000392	XLOC_032821	--	Novel_lncRNA	41111755	41115424	+	ENSSSCT00000007931	ENSSSCG00000007249	NOL4L	nucleolar protein 4-like [Source:HGNC Symbol;Acc:HGNC:16106]	40987883	41067223	-	44531	upstream
chr17	LNC_000393	XLOC_032850	--	Novel_lncRNA	41941051	41966927	+	ENSSSCT00000007949	ENSSSCG00000007264	CDK5RAP1	CDK5 regulatory subunit associated protein 1 [Source:HGNC Symbol;Acc:HGNC:15880]	41827904	41861498	-	79552	upstream
chr17	LNC_000393	XLOC_032850	--	Novel_lncRNA	41941051	41966927	+	ENSSSCT00000027119	ENSSSCG00000027410	CBFA2T2	core-binding factor, runt domain, alpha subunit 2; translocated to, 2 [Source:HGNC Symbol;Acc:HGNC:1536]	41984968	42024001	-	18040	downstream
chr17	LNC_000393	XLOC_032850	--	Novel_lncRNA	41941051	41966927	+	ENSSSCT00000007950	ENSSSCG00000007265	SNTA1	syntrophin, alpha 1 [Source:HGNC Symbol;Acc:HGNC:11167]	41868153	41896580	-	44470	upstream
chr17	LNC_000393	XLOC_032850	--	Novel_lncRNA	41941051	41966927	+	ENSSSCT00000030451	ENSSSCG00000027410	CBFA2T2	core-binding factor, runt domain, alpha subunit 2; translocated to, 2 [Source:HGNC Symbol;Acc:HGNC:1536]	41984968	42071429	-	18040	downstream
chr18	ALDBSSCT0000005660	ALDBSSCG0000003435	--	Annotated_lncRNA	20228066	20236206	-	ENSSSCT00000024955	ENSSSCG00000025967	SMKR1	small lysine-rich protein 1 [Source:HGNC Symbol;Acc:HGNC:43561]	20261130	20270358	-	24923	downstream
chr18	ALDBSSCT0000005660	ALDBSSCG0000003435	--	Annotated_lncRNA	20228066	20236206	-	ENSSSCT00000018038	ENSSSCG00000016568	AHCYL2	adenosylhomocysteinase-like 2 [Source:HGNC Symbol;Acc:HGNC:22204]	20333818	20511321	-	97611	downstream
chr18	ALDBSSCT0000005660	ALDBSSCG0000003435	--	Annotated_lncRNA	20228066	20236206	-	ENSSSCT00000018037	ENSSSCG00000016567	STRIP2	striatin interacting protein 2 [Source:HGNC Symbol;Acc:HGNC:22209]	20279718	20326503	-	43511	downstream
chr17	LNC_000396	XLOC_033130	--	Novel_lncRNA	69054821	69056149	+	ENSSSCT00000022675	ENSSSCG00000025784	CDH4	cadherin 4, type 1, R-cadherin (retinal) [Source:HGNC Symbol;Acc:HGNC:1763]	68895866	68979179	+	75641	downstream
chr17	LNC_000396	XLOC_033130	--	Novel_lncRNA	69054821	69056149	+	ENSSSCT00000028398	ENSSSCG00000026052	LSM14B	LSM family member 14B [Source:HGNC Symbol;Acc:HGNC:15887]	69083024	69090021	-	26874	downstream
chr17	LNC_000396	XLOC_033130	--	Novel_lncRNA	69054821	69056149	+	ENSSSCT00000024716	ENSSSCG00000024694	TAF4	TATA-box binding protein associated factor 4 [Source:HGNC Symbol;Acc:HGNC:11537]	68993803	69054750	-	70	upstream
chr17	LNC_000396	XLOC_033130	--	Novel_lncRNA	69054821	69056149	+	ENSSSCT00000027440	ENSSSCG00000028820	--	--	69093361	69105452	+	37211	upstream
chr17	LNC_000396	XLOC_033130	--	Novel_lncRNA	69054821	69056149	+	ENSSSCT00000031262	ENSSSCG00000024694	TAF4	TATA-box binding protein associated factor 4 [Source:HGNC Symbol;Acc:HGNC:11537]	69010095	69054750	-	70	upstream
chr17	LNC_000396	XLOC_033130	--	Novel_lncRNA	69054821	69056149	+	ENSSSCT00000025728	ENSSSCG00000030630	PSMA7	proteasome subunit alpha 7 [Source:HGNC Symbol;Acc:HGNC:9536]	69075553	69079393	+	19403	upstream
chr17	LNC_000397	XLOC_033369	--	Novel_lncRNA	30248244	30249522	-	ENSSSCT00000007767	ENSSSCG00000007095	POLR3F	polymerase (RNA) III (DNA directed) polypeptide F, 39 kDa [Source:HGNC Symbol;Acc:HGNC:15763]	30196827	30214872	-	33371	upstream
chr17	LNC_000397	XLOC_033369	--	Novel_lncRNA	30248244	30249522	-	ENSSSCT00000007766	ENSSSCG00000007094	--	--	30140823	30196240	-	52003	upstream
chr17	LNC_000397	XLOC_033369	--	Novel_lncRNA	30248244	30249522	-	ENSSSCT00000028450	ENSSSCG00000025589	LINC00493	long intergenic non-protein coding RNA 493 [Source:HGNC Symbol;Acc:HGNC:43430]	30294309	30296939	+	44786	upstream
chr17	LNC_000397	XLOC_033369	--	Novel_lncRNA	30248244	30249522	-	ENSSSCT00000007770	ENSSSCG00000007098	DTD1	D-tyrosyl-tRNA deacylase 1 [Source:HGNC Symbol;Acc:HGNC:16219]	30300695	30435498	+	51172	upstream
chr17	LNC_000397	XLOC_033369	--	Novel_lncRNA	30248244	30249522	-	ENSSSCT00000007769	ENSSSCG00000007097	SEC23B	Sec23 homolog B, COPII coat complex component [Source:HGNC Symbol;Acc:HGNC:10702]	30249630	30291237	+	107	upstream
chr17	LNC_000397	XLOC_033369	--	Novel_lncRNA	30248244	30249522	-	ENSSSCT00000026567	ENSSSCG00000030631	DZANK1	double zinc ribbon and ankyrin repeat domains 1 [Source:HGNC Symbol;Acc:HGNC:15858]	30214931	30227617	+	20626	downstream
chr17	LNC_000397	XLOC_033369	--	Novel_lncRNA	30248244	30249522	-	ENSSSCT00000029409	ENSSSCG00000029494	RBBP9	retinoblastoma binding protein 9 [Source:HGNC Symbol;Acc:HGNC:9892]	30230129	30239286	-	8957	upstream
chr17	LNC_000394	XLOC_032920	--	Novel_lncRNA	45719144	45721288	+	ENSSSCT00000008021	ENSSSCG00000007330	--	--	45773787	45783071	-	52498	downstream
chr17	LNC_000394	XLOC_032920	--	Novel_lncRNA	45719144	45721288	+	ENSSSCT00000027233	ENSSSCG00000025673	--	--	45802388	45828607	+	81099	upstream
chr17	LNC_000394	XLOC_032920	--	Novel_lncRNA	45719144	45721288	+	ENSSSCT00000008022	ENSSSCG00000007331	RBL1	retinoblastoma-like 1 [Source:HGNC Symbol;Acc:HGNC:9893]	45642978	45716789	-	2354	upstream
chr17	LNC_000395	XLOC_032993	--	Novel_lncRNA	52134596	52136164	+	ENSSSCT00000008064	ENSSSCG00000007368	--	--	51872900	52042154	+	92441	downstream
chr17	LNC_000395	XLOC_032993	--	Novel_lncRNA	52134596	52136164	+	ENSSSCT00000008066	ENSSSCG00000007370	R3HDML	R3H domain containing-like [Source:HGNC Symbol;Acc:HGNC:16249]	52213809	52224989	+	77644	upstream
chr17	LNC_000395	XLOC_032993	--	Novel_lncRNA	52134596	52136164	+	ENSSSCT00000008069	ENSSSCG00000007372	FITM2	Fat storage-inducing transmembrane protein 2 [Source:UniProtKB/Swiss-Prot;Acc:B2LYG4]	52190681	52194861	-	54516	downstream
chr17	LNC_000395	XLOC_032993	--	Novel_lncRNA	52134596	52136164	+	ENSSSCT00000030158	ENSSSCG00000025757	--	--	52126197	52134377	-	218	upstream
chr17	LNC_000395	XLOC_032993	--	Novel_lncRNA	52134596	52136164	+	ENSSSCT00000008071	ENSSSCG00000007373	GDAP1L1	ganglioside induced differentiation associated protein 1-like 1 [Source:HGNC Symbol;Acc:HGNC:4213]	52158339	52183187	+	22174	upstream
chr17	LNC_000398	XLOC_033398	--	Novel_lncRNA	35133266	35137233	-	ENSSSCT00000007807	ENSSSCG00000007135	NINL	ninein like [Source:HGNC Symbol;Acc:HGNC:29163]	35161185	35273202	+	23951	upstream
chr17	LNC_000398	XLOC_033398	--	Novel_lncRNA	35133266	35137233	-	ENSSSCT00000025915	ENSSSCG00000022124	NANP	N-acetylneuraminic acid phosphatase [Source:HGNC Symbol;Acc:HGNC:16140]	35137342	35149722	+	108	upstream
chr17	LNC_000398	XLOC_033398	--	Novel_lncRNA	35133266	35137233	-	ENSSSCT00000026945	ENSSSCG00000007135	NINL	ninein like [Source:HGNC Symbol;Acc:HGNC:29163]	35161185	35273202	+	23951	upstream
chr5	LNC_000558	XLOC_048747	--	Novel_lncRNA	93819968	93830104	-	ENSSSCT00000000995	ENSSSCG00000000911	--	--	93830785	93831153	+	680	upstream
chr15	ALDBSSCT0000004622	ALDBSSCG0000002811	--	Annotated_lncRNA	140146925	140148258	-	ENSSSCT00000017680	ENSSSCG00000016237	--	--	139929261	140112107	-	34817	upstream
chr5	LNC_000554	XLOC_048611	--	Novel_lncRNA	80721756	80722951	-	ENSSSCT00000000881	ENSSSCG00000000812	--	--	80769502	80770315	+	46550	upstream
chr5	LNC_000554	XLOC_048611	--	Novel_lncRNA	80721756	80722951	-	ENSSSCT00000000880	ENSSSCG00000000811	--	--	80803505	80804803	+	80553	upstream
chr5	LNC_000554	XLOC_048611	--	Novel_lncRNA	80721756	80722951	-	ENSSSCT00000000879	ENSSSCG00000000810	AMIGO2	adhesion molecule with Ig-like domain 2 [Source:HGNC Symbol;Acc:HGNC:24073]	80651422	80652987	-	68768	upstream
chr5	LNC_000555	XLOC_048662	--	Novel_lncRNA	84430478	84470647	-	ENSSSCT00000000931	ENSSSCG00000000854	--	--	84334737	84425007	+	5470	downstream
chr5	LNC_000556	XLOC_048671	--	Novel_lncRNA	86497293	86498106	-	ENSSSCT00000028915	ENSSSCG00000000862	--	--	86352832	86413187	+	84105	downstream
chr5	LNC_000556	XLOC_048671	--	Novel_lncRNA	86497293	86498106	-	ENSSSCT00000030865	ENSSSCG00000023236	--	--	86522710	86547795	-	24603	downstream
chr5	LNC_000556	XLOC_048671	--	Novel_lncRNA	86497293	86498106	-	ENSSSCT00000000945	ENSSSCG00000000866	MYBPC1	myosin binding protein C, slow type [Source:HGNC Symbol;Acc:HGNC:7549]	86513955	86609182	-	15848	downstream
chr5	LNC_000556	XLOC_048671	--	Novel_lncRNA	86497293	86498106	-	ENSSSCT00000000942	ENSSSCG00000000863	SYCP3	synaptonemal complex protein 3 [Source:HGNC Symbol;Acc:HGNC:18130]	86445888	86455618	+	41674	downstream
chr5	LNC_000556	XLOC_048671	--	Novel_lncRNA	86497293	86498106	-	ENSSSCT00000000943	ENSSSCG00000000864	CHPT1	choline phosphotransferase 1 [Source:HGNC Symbol;Acc:HGNC:17852]	86457216	86497240	-	52	upstream
chr5	LNC_000556	XLOC_048671	--	Novel_lncRNA	86497293	86498106	-	ENSSSCT00000000941	ENSSSCG00000000862	--	--	86388466	86413187	+	84105	downstream
chr18	ALDBSSCT0000005664	ALDBSSCG0000003437	--	Annotated_lncRNA	21014027	21015932	-	ENSSSCT00000018055	ENSSSCG00000016583	FAM71F2	family with sequence similarity 71 member F2 [Source:HGNC Symbol;Acc:HGNC:27998]	20988701	21001791	-	12235	upstream
chr18	ALDBSSCT0000005664	ALDBSSCG0000003437	--	Annotated_lncRNA	21014027	21015932	-	ENSSSCT00000018054	ENSSSCG00000016582	FAM71F1	family with sequence similarity 71 member F1 [Source:HGNC Symbol;Acc:HGNC:30704]	20953313	20967789	-	46237	upstream
chr18	ALDBSSCT0000005664	ALDBSSCG0000003437	--	Annotated_lncRNA	21014027	21015932	-	ENSSSCT00000018057	ENSSSCG00000016585	IMPDH1	IMP (inosine 5'-monophosphate) dehydrogenase 1 [Source:HGNC Symbol;Acc:HGNC:6052]	21049234	21065574	+	33301	upstream
chr18	ALDBSSCT0000005664	ALDBSSCG0000003437	--	Annotated_lncRNA	21014027	21015932	-	ENSSSCT00000024087	ENSSSCG00000016585	IMPDH1	IMP (inosine 5'-monophosphate) dehydrogenase 1 [Source:HGNC Symbol;Acc:HGNC:6052]	21049264	21065574	+	33331	upstream
chr18	ALDBSSCT0000005664	ALDBSSCG0000003437	--	Annotated_lncRNA	21014027	21015932	-	ENSSSCT00000018052	ENSSSCG00000016581	CALU	calumenin [Source:HGNC Symbol;Acc:HGNC:1458]	20911133	20945201	-	68825	upstream
chr5	LNC_000550	XLOC_047749	--	Novel_lncRNA	14132340	14137522	-	ENSSSCT00000000180	ENSSSCG00000000171	CKAP4	cytoskeleton-associated protein 4 [Source:HGNC Symbol;Acc:HGNC:16991]	14098331	14106287	+	26052	downstream
chr5	LNC_000550	XLOC_047749	--	Novel_lncRNA	14132340	14137522	-	ENSSSCT00000027937	ENSSSCG00000024881	--	--	14038432	14067985	-	64354	upstream
chr5	LNC_000550	XLOC_047749	--	Novel_lncRNA	14132340	14137522	-	ENSSSCT00000029499	ENSSSCG00000027055	NUAK1	NUAK family, SNF1-like kinase, 1 [Source:HGNC Symbol;Acc:HGNC:14311]	14214562	14290637	+	77039	upstream
chr5	LNC_000550	XLOC_047749	--	Novel_lncRNA	14132340	14137522	-	ENSSSCT00000000179	ENSSSCG00000000170	--	--	14172209	14204048	+	34686	upstream
chr15	ALDBSSCT0000004629	ALDBSSCG0000002814	--	Annotated_lncRNA	142402240	142421441	-	ENSSSCT00000017689	ENSSSCG00000016245	--	--	142507292	142537037	+	85850	upstream
chr15	ALDBSSCT0000004629	ALDBSSCG0000002814	--	Annotated_lncRNA	142402240	142421441	-	ENSSSCT00000017688	ENSSSCG00000016244	COL4A4	collagen, type IV, alpha 4 [Source:HGNC Symbol;Acc:HGNC:2206]	142283364	142381346	-	20893	upstream
chr15	ALDBSSCT0000004629	ALDBSSCG0000002814	--	Annotated_lncRNA	142402240	142421441	-	ENSSSCT00000026444	ENSSSCG00000016245	--	--	142504568	142537037	+	83126	upstream
chr5	LNC_000552	XLOC_048409	--	Novel_lncRNA	60856356	60865348	-	ENSSSCT00000000648	ENSSSCG00000000603	PDE6H	phosphodiesterase 6H [Source:HGNC Symbol;Acc:HGNC:8790]	60945101	60950201	-	79752	downstream
chr5	LNC_000552	XLOC_048409	--	Novel_lncRNA	60856356	60865348	-	ENSSSCT00000000647	ENSSSCG00000000602	RERG	RAS-like, estrogen-regulated, growth inhibitor [Source:HGNC Symbol;Acc:HGNC:15980]	60736663	60851687	+	4668	downstream
chr3	ALDBSSCT0000007132	ALDBSSCG0000004337	--	Annotated_lncRNA	44891244	44910629	-	ENSSSCT00000008858	ENSSSCG00000021799	--	--	44959042	44960556	+	48412	upstream
chr3	ALDBSSCT0000007132	ALDBSSCG0000004337	--	Annotated_lncRNA	44891244	44910629	-	ENSSSCT00000008856	ENSSSCG00000008083	--	--	44792074	44815513	+	75730	downstream
chr3	ALDBSSCT0000007132	ALDBSSCG0000004337	--	Annotated_lncRNA	44891244	44910629	-	ENSSSCT00000008857	ENSSSCG00000008084	--	--	44873845	44878643	-	12600	upstream
chr3	ALDBSSCT0000007276	ALDBSSCG0000004410	--	Annotated_lncRNA	100972901	100973519	-	ENSSSCT00000009247	ENSSSCG00000008445	SRBD1	S1 RNA binding domain 1 [Source:HGNC Symbol;Acc:HGNC:25521]	101017493	101209095	+	43973	upstream
chr2	ALDBSSCT0000006449	ALDBSSCG0000003935	--	Annotated_lncRNA	139002841	139005003	-	ENSSSCT00000015588	ENSSSCG00000014266	CDC42SE2	CDC42 small effector 2 [Source:HGNC Symbol;Acc:HGNC:18547]	138992124	138999352	+	3488	downstream
chr2	ALDBSSCT0000006449	ALDBSSCG0000003935	--	Annotated_lncRNA	139002841	139005003	-	ENSSSCT00000015589	ENSSSCG00000014267	--	--	139027023	139128129	-	22019	downstream
chr2	ALDBSSCT0000006449	ALDBSSCG0000003935	--	Annotated_lncRNA	139002841	139005003	-	ENSSSCT00000029538	ENSSSCG00000014265	LYRM7	LYR motif containing 7 [Source:HGNC Symbol;Acc:HGNC:28072]	138829270	138927255	+	75585	downstream
chr2	ALDBSSCT0000006449	ALDBSSCG0000003935	--	Annotated_lncRNA	139002841	139005003	-	ENSSSCT00000015586	ENSSSCG00000014265	LYRM7	LYR motif containing 7 [Source:HGNC Symbol;Acc:HGNC:28072]	138828476	138927255	+	75585	downstream
chr13	ALDBSSCT0000002758	ALDBSSCG0000001673	--	Annotated_lncRNA	109189179	109210001	+	ENSSSCT00000024938	ENSSSCG00000023434	PPM1L	protein phosphatase, Mg2+/Mn2+ dependent 1L [Source:HGNC Symbol;Acc:HGNC:16381]	108941014	109147849	+	41329	downstream
chr13	ALDBSSCT0000002758	ALDBSSCG0000001673	--	Annotated_lncRNA	109189179	109210001	+	ENSSSCT00000024911	ENSSSCG00000022952	NMD3	NMD3 ribosome export adaptor [Source:HGNC Symbol;Acc:HGNC:24250]	109220805	109339504	+	10803	upstream
chr13	ALDBSSCT0000002758	ALDBSSCG0000001673	--	Annotated_lncRNA	109189179	109210001	+	ENSSSCT00000026210	ENSSSCG00000021774	B3GALNT1	beta-1,3-N-acetylgalactosaminyltransferase 1 (globoside blood group) [Source:HGNC Symbol;Acc:HGNC:918]	109170833	109175561	-	13617	upstream
chr13	ALDBSSCT0000002757	ALDBSSCG0000001672	--	Annotated_lncRNA	107046764	107049932	+	ENSSSCT00000024213	ENSSSCG00000022054	--	--	107041446	107043539	-	3224	upstream
chr13	ALDBSSCT0000002757	ALDBSSCG0000001672	--	Annotated_lncRNA	107046764	107049932	+	ENSSSCT00000026649	ENSSSCG00000026018	MFSD1	major facilitator superfamily domain containing 1 [Source:HGNC Symbol;Acc:HGNC:25874]	107004094	107022592	+	24171	downstream
chr13	ALDBSSCT0000002757	ALDBSSCG0000001672	--	Annotated_lncRNA	107046764	107049932	+	ENSSSCT00000024239	ENSSSCG00000022054	--	--	107041040	107043539	-	3224	upstream
chr17	ALDBSSCT0000005151	ALDBSSCG0000003106	--	Annotated_lncRNA	36275202	36282755	+	ENSSSCT00000030866	ENSSSCG00000021401	GFRA4	GDNF family receptor alpha 4 [Source:HGNC Symbol;Acc:HGNC:13821]	36368069	36370418	+	85313	upstream
chr17	ALDBSSCT0000005151	ALDBSSCG0000003106	--	Annotated_lncRNA	36275202	36282755	+	ENSSSCT00000007815	ENSSSCG00000007143	MAVS	mitochondrial antiviral signaling protein [Source:HGNC Symbol;Acc:HGNC:29233]	36195472	36210175	-	65026	upstream
chr17	ALDBSSCT0000005151	ALDBSSCG0000003106	--	Annotated_lncRNA	36275202	36282755	+	ENSSSCT00000031284	ENSSSCG00000023811	AP5S1	adaptor related protein complex 5, sigma 1 subunit [Source:HGNC Symbol;Acc:HGNC:15875]	36226136	36236032	-	39169	upstream
chr17	ALDBSSCT0000005151	ALDBSSCG0000003106	--	Annotated_lncRNA	36275202	36282755	+	ENSSSCT00000007817	ENSSSCG00000007145	ADAM33	ADAM metallopeptidase domain 33 [Source:HGNC Symbol;Acc:HGNC:15478]	36350319	36365013	+	67563	upstream
chr17	ALDBSSCT0000005151	ALDBSSCG0000003106	--	Annotated_lncRNA	36275202	36282755	+	ENSSSCT00000034089	ENSSSCG00000007143	MAVS	mitochondrial antiviral signaling protein [Source:HGNC Symbol;Acc:HGNC:29233]	36198090	36210175	-	65026	upstream
chr17	ALDBSSCT0000005151	ALDBSSCG0000003106	--	Annotated_lncRNA	36275202	36282755	+	ENSSSCT00000007820	ENSSSCG00000007147	--	--	36285534	36305348	-	2778	downstream
chr17	ALDBSSCT0000005151	ALDBSSCG0000003106	--	Annotated_lncRNA	36275202	36282755	+	ENSSSCT00000007821	ENSSSCG00000007148	C20orf27	chromosome 20 open reading frame 27 [Source:HGNC Symbol;Acc:HGNC:15873]	36283270	36283745	+	514	upstream
chr17	ALDBSSCT0000005151	ALDBSSCG0000003106	--	Annotated_lncRNA	36275202	36282755	+	ENSSSCT00000007822	ENSSSCG00000007149	SPEF1	sperm flagellar 1 [Source:HGNC Symbol;Acc:HGNC:15874]	36267030	36270635	+	4566	downstream
chr17	ALDBSSCT0000005151	ALDBSSCG0000003106	--	Annotated_lncRNA	36275202	36282755	+	ENSSSCT00000007823	ENSSSCG00000007150	TIGD6	tigger transposable element derived 6 [Source:HGNC Symbol;Acc:HGNC:18332]	36263349	36263885	+	11316	downstream
chr17	ALDBSSCT0000005151	ALDBSSCG0000003106	--	Annotated_lncRNA	36275202	36282755	+	ENSSSCT00000007824	ENSSSCG00000007151	CDC25B	cell division cycle 25B [Source:HGNC Symbol;Acc:HGNC:1726]	36244258	36254564	-	20637	upstream
chr17	ALDBSSCT0000005151	ALDBSSCG0000003106	--	Annotated_lncRNA	36275202	36282755	+	ENSSSCT00000007826	ENSSSCG00000007153	ATRN	attractin [Source:HGNC Symbol;Acc:HGNC:885]	36381690	36619079	-	98934	downstream
chr7	ENSSSCT00000035481	ENSSSCG00000030916	CH242-136A20.1	Annotated_lncRNA	106551501	106552738	-	ENSSSCT00000002672	ENSSSCG00000002403	VIPAS39	VPS33B interacting protein, apical-basolateral polarity regulator, spe-39 homolog [Source:HGNC Symbol;Acc:HGNC:20347]	106449284	106472504	+	78996	downstream
chr7	ENSSSCT00000035481	ENSSSCG00000030916	CH242-136A20.1	Annotated_lncRNA	106551501	106552738	-	ENSSSCT00000002663	ENSSSCG00000002395	TMED8	transmembrane p24 trafficking protein family member 8 [Source:HGNC Symbol;Acc:HGNC:18633]	106527387	106537905	+	13595	downstream
chr7	ENSSSCT00000035481	ENSSSCG00000030916	CH242-136A20.1	Annotated_lncRNA	106551501	106552738	-	ENSSSCT00000033132	ENSSSCG00000002396	GSTZ1	glutathione S-transferase zeta 1 [Source:HGNC Symbol;Acc:HGNC:4643]	106553043	106561411	-	304	downstream
chr7	ENSSSCT00000035481	ENSSSCG00000030916	CH242-136A20.1	Annotated_lncRNA	106551501	106552738	-	ENSSSCT00000002665	ENSSSCG00000002397	POMT2	protein-O-mannosyltransferase 2 [Source:HGNC Symbol;Acc:HGNC:19743]	106565024	106604049	+	12285	upstream
chr7	ENSSSCT00000035481	ENSSSCG00000030916	CH242-136A20.1	Annotated_lncRNA	106551501	106552738	-	ENSSSCT00000002664	ENSSSCG00000002396	GSTZ1	glutathione S-transferase zeta 1 [Source:HGNC Symbol;Acc:HGNC:4643]	106553162	106564932	-	423	downstream
chr7	ENSSSCT00000035481	ENSSSCG00000030916	CH242-136A20.1	Annotated_lncRNA	106551501	106552738	-	ENSSSCT00000002667	ENSSSCG00000002399	NGB	Neuroglobin [Source:UniProtKB/Swiss-Prot;Acc:Q6WZ17]	106610697	106615261	+	57958	upstream
chr7	ENSSSCT00000035481	ENSSSCG00000030916	CH242-136A20.1	Annotated_lncRNA	106551501	106552738	-	ENSSSCT00000033055	ENSSSCG00000002396	GSTZ1	glutathione S-transferase zeta 1 [Source:HGNC Symbol;Acc:HGNC:4643]	106554247	106561133	-	1508	downstream
chr7	ENSSSCT00000035481	ENSSSCG00000030916	CH242-136A20.1	Annotated_lncRNA	106551501	106552738	-	ENSSSCT00000033148	ENSSSCG00000002396	GSTZ1	glutathione S-transferase zeta 1 [Source:HGNC Symbol;Acc:HGNC:4643]	106554247	106559336	-	1508	downstream
chr7	ENSSSCT00000035481	ENSSSCG00000030916	CH242-136A20.1	Annotated_lncRNA	106551501	106552738	-	ENSSSCT00000024597	ENSSSCG00000021242	--	--	106493557	106507577	-	43923	upstream
chr7	ENSSSCT00000035481	ENSSSCG00000030916	CH242-136A20.1	Annotated_lncRNA	106551501	106552738	-	ENSSSCT00000036355	ENSSSCG00000002396	GSTZ1	glutathione S-transferase zeta 1 [Source:HGNC Symbol;Acc:HGNC:4643]	106554247	106561133	-	1508	downstream
chr7	ENSSSCT00000035481	ENSSSCG00000030916	CH242-136A20.1	Annotated_lncRNA	106551501	106552738	-	ENSSSCT00000036020	ENSSSCG00000002396	GSTZ1	glutathione S-transferase zeta 1 [Source:HGNC Symbol;Acc:HGNC:4643]	106554530	106561133	-	1791	downstream
chr7	ENSSSCT00000035481	ENSSSCG00000030916	CH242-136A20.1	Annotated_lncRNA	106551501	106552738	-	ENSSSCT00000023660	ENSSSCG00000030069	NOXRED1	NADP-dependent oxidoreductase domain containing 1 [Source:HGNC Symbol;Acc:HGNC:20487]	106476694	106492339	+	59161	downstream
chr7	ENSSSCT00000035481	ENSSSCG00000030916	CH242-136A20.1	Annotated_lncRNA	106551501	106552738	-	ENSSSCT00000036281	ENSSSCG00000002396	GSTZ1	glutathione S-transferase zeta 1 [Source:HGNC Symbol;Acc:HGNC:4643]	106554049	106564927	-	1310	downstream
chr7	ENSSSCT00000035481	ENSSSCG00000030916	CH242-136A20.1	Annotated_lncRNA	106551501	106552738	-	ENSSSCT00000035937	ENSSSCG00000002396	GSTZ1	glutathione S-transferase zeta 1 [Source:HGNC Symbol;Acc:HGNC:4643]	106554762	106564932	-	2023	downstream
chr17	ALDBSSCT0000005159	ALDBSSCG0000003112	--	Annotated_lncRNA	41261739	41270788	+	ENSSSCT00000007936	ENSSSCG00000007253	MAPRE1	microtubule associated protein RP/EB family member 1 [Source:HGNC Symbol;Acc:HGNC:6890]	41327600	41359142	+	56811	upstream
chr17	ALDBSSCT0000005159	ALDBSSCG0000003112	--	Annotated_lncRNA	41261739	41270788	+	ENSSSCT00000007935	ENSSSCG00000007252	DNMT3B	DNA (cytosine-5-)-methyltransferase 3 beta [Source:HGNC Symbol;Acc:HGNC:2979]	41298141	41322901	+	27352	upstream
chr17	ALDBSSCT0000005159	ALDBSSCG0000003112	--	Annotated_lncRNA	41261739	41270788	+	ENSSSCT00000007932	ENSSSCG00000007250	--	--	41183254	41198099	-	63639	upstream
chr16	ALDBSSCT0000004973	ALDBSSCG0000003010	--	Annotated_lncRNA	52627785	52635265	-	ENSSSCT00000018486	ENSSSCG00000016976	ZNF366	zinc finger protein 366 [Source:HGNC Symbol;Acc:HGNC:18316]	52692102	52734538	-	56836	downstream
chr16	ALDBSSCT0000004973	ALDBSSCG0000003010	--	Annotated_lncRNA	52627785	52635265	-	ENSSSCT00000022648	ENSSSCG00000023818	MRPS27	mitochondrial ribosomal protein S27 [Source:HGNC Symbol;Acc:HGNC:14512]	52497270	52593611	-	34173	upstream
chr16	ALDBSSCT0000004973	ALDBSSCG0000003010	--	Annotated_lncRNA	52627785	52635265	-	ENSSSCT00000018485	ENSSSCG00000016975	PTCD2	pentatricopeptide repeat domain 2 [Source:HGNC Symbol;Acc:HGNC:25734]	52593639	52620444	+	7340	downstream
chr3	ALDBSSCT0000007221	ALDBSSCG0000004390	--	Annotated_lncRNA	82405885	82491751	-	ENSSSCT00000009164	ENSSSCG00000025751	--	--	82274612	82325849	-	80035	upstream
chr3	ALDBSSCT0000007223	ALDBSSCG0000004392	--	Annotated_lncRNA	83819580	83867999	-	ENSSSCT00000009171	ENSSSCG00000008376	COMMD1	copper metabolism (Murr1) domain containing 1 [Source:HGNC Symbol;Acc:HGNC:23024]	83690953	83749571	-	70008	upstream
chr3	ALDBSSCT0000007223	ALDBSSCG0000004392	--	Annotated_lncRNA	83819580	83867999	-	ENSSSCT00000009172	ENSSSCG00000008377	CCT4	chaperonin containing TCP1, subunit 4 (delta) [Source:HGNC Symbol;Acc:HGNC:1617]	83760113	83777463	+	42116	downstream
chr3	ALDBSSCT0000007223	ALDBSSCG0000004392	--	Annotated_lncRNA	83819580	83867999	-	ENSSSCT00000009173	ENSSSCG00000008378	FAM161A	family with sequence similarity 161 member A [Source:HGNC Symbol;Acc:HGNC:25808]	83788448	83814343	+	5236	downstream
chr3	ALDBSSCT0000007222	ALDBSSCG0000004391	--	Annotated_lncRNA	83577180	83582761	-	ENSSSCT00000009170	ENSSSCG00000008375	--	--	83522726	83524236	+	52943	downstream
chr18	ALDBSSCT0000005714	ALDBSSCG0000003468	--	Annotated_lncRNA	43474678	43751946	-	ENSSSCT00000018144	ENSSSCG00000016665	BMPER	BMP binding endothelial regulator [Source:HGNC Symbol;Acc:HGNC:24154]	43218004	43462084	-	12593	upstream
chr18	ALDBSSCT0000005714	ALDBSSCG0000003468	--	Annotated_lncRNA	43474678	43751946	-	ENSSSCT00000018146	ENSSSCG00000016667	--	--	43753100	43977664	-	1153	downstream
chr18	ALDBSSCT0000005714	ALDBSSCG0000003468	--	Annotated_lncRNA	43474678	43751946	-	ENSSSCT00000029081	ENSSSCG00000016665	BMPER	BMP binding endothelial regulator [Source:HGNC Symbol;Acc:HGNC:24154]	43216779	43429453	-	45224	upstream
chr14	ALDBSSCT0000003939	ALDBSSCG0000002372	--	Annotated_lncRNA	65766030	65775758	-	ENSSSCT00000011162	ENSSSCG00000010196	ZNF25	zinc finger protein 25 [Source:HGNC Symbol;Acc:HGNC:13043]	65796609	65894063	+	20850	upstream
chr14	ALDBSSCT0000003939	ALDBSSCG0000002372	--	Annotated_lncRNA	65766030	65775758	-	ENSSSCT00000027466	ENSSSCG00000023596	--	--	65830734	65846117	-	54975	downstream
chr14	ALDBSSCT0000003939	ALDBSSCG0000002372	--	Annotated_lncRNA	65766030	65775758	-	ENSSSCT00000025281	ENSSSCG00000023241	--	--	65734685	65742345	-	23684	upstream
chr11	ALDBSSCT0000001893	ALDBSSCG0000001144	--	Annotated_lncRNA	6913510	6923788	-	ENSSSCT00000010222	ENSSSCG00000009328	--	--	6990311	7005937	-	66522	downstream
chr11	ALDBSSCT0000001894	ALDBSSCG0000001144	--	Annotated_lncRNA	6913510	6923806	-	ENSSSCT00000010222	ENSSSCG00000009328	--	--	6990311	7005937	-	66504	downstream
chr2	ALDBSSCT0000006191	ALDBSSCG0000003785	--	Annotated_lncRNA	18181478	18195388	-	ENSSSCT00000014497	ENSSSCG00000013273	CHST1	carbohydrate (keratan sulfate Gal-6) sulfotransferase 1 [Source:HGNC Symbol;Acc:HGNC:1969]	18179200	18180435	-	1042	upstream
chr2	ALDBSSCT0000006191	ALDBSSCG0000003785	--	Annotated_lncRNA	18181478	18195388	-	ENSSSCT00000014496	ENSSSCG00000013272	--	--	18078797	18086572	-	94905	upstream
chr11	ALDBSSCT0000001873	ALDBSSCG0000001134	--	Annotated_lncRNA	5163849	5173214	-	ENSSSCT00000010210	ENSSSCG00000009319	PAN3	PAN3 poly(A) specific ribonuclease subunit [Source:HGNC Symbol;Acc:HGNC:29991]	5173861	5301089	+	646	upstream
chr11	ALDBSSCT0000001873	ALDBSSCG0000001134	--	Annotated_lncRNA	5163849	5173214	-	ENSSSCT00000010205	ENSSSCG00000009315	--	--	5083286	5087518	-	76330	upstream
chr11	ALDBSSCT0000001873	ALDBSSCG0000001134	--	Annotated_lncRNA	5163849	5173214	-	ENSSSCT00000010206	ENSSSCG00000009316	URAD	ureidoimidazoline (2-oxo-4-hydroxy-4-carboxy-5-) decarboxylase [Source:HGNC Symbol;Acc:HGNC:17785]	5097306	5105529	+	58319	downstream
chr11	ALDBSSCT0000001873	ALDBSSCG0000001134	--	Annotated_lncRNA	5163849	5173214	-	ENSSSCT00000010207	ENSSSCG00000009317	CDX2	caudal type homeobox 2 [Source:HGNC Symbol;Acc:HGNC:1806]	5113709	5119694	+	44154	downstream
chr1	LNC_000169	XLOC_012064	--	Novel_lncRNA	168970852	168979133	-	ENSSSCT00000005384	ENSSSCG00000004878	SOCS6	suppressor of cytokine signaling 6 [Source:HGNC Symbol;Acc:HGNC:16833]	168992150	168993757	-	13016	downstream
chr1	LNC_000168	XLOC_012026	--	Novel_lncRNA	164773864	164776203	-	ENSSSCT00000005367	ENSSSCG00000004861	TSHZ1	teashirt zinc finger homeobox 1 [Source:HGNC Symbol;Acc:HGNC:10669]	164832382	164835889	+	56178	upstream
chr1	LNC_000164	XLOC_011590	--	Novel_lncRNA	119819703	119822808	-	ENSSSCT00000005044	ENSSSCG00000004565	CA12	carbonic anhydrase XII [Source:HGNC Symbol;Acc:HGNC:1371]	119861130	119869383	+	38321	upstream
chr1	LNC_000164	XLOC_011590	--	Novel_lncRNA	119819703	119822808	-	ENSSSCT00000028774	ENSSSCG00000029654	--	--	119639238	119725151	-	94551	upstream
chr1	ALDBSSCT0000000705	ALDBSSCG0000000419	--	Annotated_lncRNA	40968874	40973200	-	ENSSSCT00000004667	ENSSSCG00000004222	NCOA7	nuclear receptor coactivator 7 [Source:HGNC Symbol;Acc:HGNC:21081]	40815279	40892663	-	76210	upstream
chr1	ALDBSSCT0000000705	ALDBSSCG0000000419	--	Annotated_lncRNA	40968874	40973200	-	ENSSSCT00000027938	ENSSSCG00000004222	NCOA7	nuclear receptor coactivator 7 [Source:HGNC Symbol;Acc:HGNC:21081]	40815279	40964113	-	4760	upstream
chr1	ALDBSSCT0000000705	ALDBSSCG0000000419	--	Annotated_lncRNA	40968874	40973200	-	ENSSSCT00000004668	ENSSSCG00000004223	HEY2	hes-related family bHLH transcription factor with YRPW motif 2 [Source:HGNC Symbol;Acc:HGNC:4881]	40989586	41000919	-	16385	downstream
chr1	LNC_000166	XLOC_011637	--	Novel_lncRNA	126367882	126374197	-	ENSSSCT00000005079	ENSSSCG00000004598	MYZAP	myocardial zonula adherens protein [Source:HGNC Symbol;Acc:HGNC:43444]	126414879	126509527	-	40681	downstream
chr1	LNC_000166	XLOC_011637	--	Novel_lncRNA	126367882	126374197	-	ENSSSCT00000027727	ENSSSCG00000030605	POLR2M	polymerase (RNA) II (DNA directed) polypeptide M [Source:HGNC Symbol;Acc:HGNC:14862]	126383470	126393930	-	9272	downstream
chr1	LNC_000161	XLOC_011467	--	Novel_lncRNA	106857429	106875143	-	ENSSSCT00000004977	ENSSSCG00000004505	SMAD2	SMAD family member 2 [Source:HGNC Symbol;Acc:HGNC:6768]	106901465	106991088	-	26321	downstream
chr1	LNC_000160	XLOC_011359	--	Novel_lncRNA	92383462	92384767	-	ENSSSCT00000004909	ENSSSCG00000004444	FAM26F	family with sequence similarity 26 member F [Source:HGNC Symbol;Acc:HGNC:33391]	92328266	92329864	-	53597	upstream
chr1	LNC_000160	XLOC_011359	--	Novel_lncRNA	92383462	92384767	-	ENSSSCT00000004906	ENSSSCG00000004441	DSE	dermatan sulfate epimerase [Source:HGNC Symbol;Acc:HGNC:21144]	92246149	92286933	-	96528	upstream
chr1	LNC_000160	XLOC_011359	--	Novel_lncRNA	92383462	92384767	-	ENSSSCT00000004911	ENSSSCG00000004446	RWDD1	RWD domain containing 1 [Source:HGNC Symbol;Acc:HGNC:20993]	92384871	92403435	+	103	upstream
chr1	LNC_000160	XLOC_011359	--	Novel_lncRNA	92383462	92384767	-	ENSSSCT00000004910	ENSSSCG00000004445	FAM26D	family with sequence similarity 26 member D [Source:HGNC Symbol;Acc:HGNC:21094]	92373295	92377185	+	6276	downstream
chr1	LNC_000160	XLOC_011359	--	Novel_lncRNA	92383462	92384767	-	ENSSSCT00000004912	ENSSSCG00000025656	--	--	92480306	92502383	+	95538	upstream
chr1	LNC_000160	XLOC_011359	--	Novel_lncRNA	92383462	92384767	-	ENSSSCT00000026294	ENSSSCG00000004444	FAM26F	family with sequence similarity 26 member F [Source:HGNC Symbol;Acc:HGNC:33391]	92328266	92329935	-	53526	upstream
chr1	LNC_000163	XLOC_011567	--	Novel_lncRNA	117518840	117522828	-	ENSSSCT00000005017	ENSSSCG00000004542	NARS	asparaginyl-tRNA synthetase [Source:HGNC Symbol;Acc:HGNC:7643]	117493535	117509485	+	9354	downstream
chr1	LNC_000163	XLOC_011567	--	Novel_lncRNA	117518840	117522828	-	ENSSSCT00000005016	ENSSSCG00000004541	FECH	ferrochelatase [Source:HGNC Symbol;Acc:HGNC:3647]	117466662	117488052	-	30787	upstream
chr1	LNC_000162	XLOC_011467	--	Novel_lncRNA	106858854	106874991	-	ENSSSCT00000004977	ENSSSCG00000004505	SMAD2	SMAD family member 2 [Source:HGNC Symbol;Acc:HGNC:6768]	106901465	106991088	-	26473	downstream
chr6	ALDBSSCT0000009356	ALDBSSCG0000005709	--	Annotated_lncRNA	56637216	56644029	-	ENSSSCT00000024192	ENSSSCG00000003325	--	--	56588397	56612552	-	24663	upstream
chr6	ALDBSSCT0000009356	ALDBSSCG0000005709	--	Annotated_lncRNA	56637216	56644029	-	ENSSSCT00000003691	ENSSSCG00000003325	--	--	56588397	56612552	-	24663	upstream
chr6	ALDBSSCT0000009356	ALDBSSCG0000005709	--	Annotated_lncRNA	56637216	56644029	-	ENSSSCT00000004406	ENSSSCG00000003984	ZNF134	zinc finger protein 134 [Source:HGNC Symbol;Acc:HGNC:12918]	56718236	56719477	+	74206	upstream
chr6	ALDBSSCT0000009356	ALDBSSCG0000005709	--	Annotated_lncRNA	56637216	56644029	-	ENSSSCT00000003692	ENSSSCG00000003326	PEG3	paternally expressed 3 [Source:HGNC Symbol;Acc:HGNC:8826]	56621615	56629815	-	7400	upstream
chr2	ALDBSSCT0000006060	ALDBSSCG0000003711	--	Annotated_lncRNA	147186389	147192155	+	ENSSSCT00000025910	ENSSSCG00000026423	SLC23A1	solute carrier family 23 (ascorbic acid transporter), member 1 [Source:HGNC Symbol;Acc:HGNC:10974]	147088755	147107049	-	79339	upstream
chr2	ALDBSSCT0000006060	ALDBSSCG0000003711	--	Annotated_lncRNA	147186389	147192155	+	ENSSSCT00000015676	ENSSSCG00000014348	SPATA24	spermatogenesis associated 24 [Source:HGNC Symbol;Acc:HGNC:27322]	147117507	147123827	-	62561	upstream
chr2	ALDBSSCT0000006060	ALDBSSCG0000003711	--	Annotated_lncRNA	147186389	147192155	+	ENSSSCT00000015675	ENSSSCG00000014347	PROB1	proline-rich basic protein 1 [Source:HGNC Symbol;Acc:HGNC:41906]	147112697	147115756	-	70632	upstream
chr2	ALDBSSCT0000006060	ALDBSSCG0000003711	--	Annotated_lncRNA	147186389	147192155	+	ENSSSCT00000032631	ENSSSCG00000014349	TMEM173	transmembrane protein 173 [Source:HGNC Symbol;Acc:HGNC:27962]	147170598	147176275	-	10113	upstream
chr2	ALDBSSCT0000006060	ALDBSSCG0000003711	--	Annotated_lncRNA	147186389	147192155	+	ENSSSCT00000015688	ENSSSCG00000014359	PSD2	pleckstrin and Sec7 domain containing 2 [Source:HGNC Symbol;Acc:HGNC:19092]	147280801	147307996	+	88645	upstream
chr2	ALDBSSCT0000006060	ALDBSSCG0000003711	--	Annotated_lncRNA	147186389	147192155	+	ENSSSCT00000030384	ENSSSCG00000029239	MZB1	marginal zone B and B1 cell-specific protein [Source:HGNC Symbol;Acc:HGNC:30125]	147107912	147110247	-	76141	upstream
chr2	ALDBSSCT0000006060	ALDBSSCG0000003711	--	Annotated_lncRNA	147186389	147192155	+	ENSSSCT00000015680	ENSSSCG00000014351	--	--	147153616	147162665	-	23723	upstream
chr2	ALDBSSCT0000006060	ALDBSSCG0000003711	--	Annotated_lncRNA	147186389	147192155	+	ENSSSCT00000034898	ENSSSCG00000014349	TMEM173	transmembrane protein 173 [Source:HGNC Symbol;Acc:HGNC:27962]	147170599	147176330	-	10058	upstream
chr2	ALDBSSCT0000006060	ALDBSSCG0000003711	--	Annotated_lncRNA	147186389	147192155	+	ENSSSCT00000015678	ENSSSCG00000014350	--	--	147165660	147166058	+	20330	downstream
chr2	ALDBSSCT0000006060	ALDBSSCG0000003711	--	Annotated_lncRNA	147186389	147192155	+	ENSSSCT00000036203	ENSSSCG00000014349	TMEM173	transmembrane protein 173 [Source:HGNC Symbol;Acc:HGNC:27962]	147171783	147176281	-	10107	upstream
chr2	ALDBSSCT0000006060	ALDBSSCG0000003711	--	Annotated_lncRNA	147186389	147192155	+	ENSSSCT00000015685	ENSSSCG00000014356	DNAJC18	DnaJ heat shock protein family (Hsp40) member C18 [Source:HGNC Symbol;Acc:HGNC:28429]	147196150	147212221	-	3994	downstream
chr2	ALDBSSCT0000006060	ALDBSSCG0000003711	--	Annotated_lncRNA	147186389	147192155	+	ENSSSCT00000031093	ENSSSCG00000026606	PAIP2	poly(A) binding protein interacting protein 2 [Source:HGNC Symbol;Acc:HGNC:17970]	147068043	147090813	+	95575	downstream
chr2	ALDBSSCT0000006060	ALDBSSCG0000003711	--	Annotated_lncRNA	147186389	147192155	+	ENSSSCT00000015677	ENSSSCG00000014349	TMEM173	transmembrane protein 173 [Source:HGNC Symbol;Acc:HGNC:27962]	147169469	147176334	-	10054	upstream
chr2	ALDBSSCT0000006060	ALDBSSCG0000003711	--	Annotated_lncRNA	147186389	147192155	+	ENSSSCT00000036520	ENSSSCG00000014349	TMEM173	transmembrane protein 173 [Source:HGNC Symbol;Acc:HGNC:27962]	147170606	147175911	-	10477	upstream
chr2	ALDBSSCT0000006060	ALDBSSCG0000003711	--	Annotated_lncRNA	147186389	147192155	+	ENSSSCT00000033393	ENSSSCG00000014349	TMEM173	transmembrane protein 173 [Source:HGNC Symbol;Acc:HGNC:27962]	147170616	147176330	-	10058	upstream
chr2	ALDBSSCT0000006060	ALDBSSCG0000003711	--	Annotated_lncRNA	147186389	147192155	+	ENSSSCT00000032759	ENSSSCG00000014349	TMEM173	transmembrane protein 173 [Source:HGNC Symbol;Acc:HGNC:27962]	147171864	147176560	-	9828	upstream
chr2	ALDBSSCT0000006060	ALDBSSCG0000003711	--	Annotated_lncRNA	147186389	147192155	+	ENSSSCT00000033067	ENSSSCG00000014349	TMEM173	transmembrane protein 173 [Source:HGNC Symbol;Acc:HGNC:27962]	147175086	147176637	-	9751	upstream
chr2	ALDBSSCT0000006060	ALDBSSCG0000003711	--	Annotated_lncRNA	147186389	147192155	+	ENSSSCT00000035934	ENSSSCG00000014349	TMEM173	transmembrane protein 173 [Source:HGNC Symbol;Acc:HGNC:27962]	147169469	147176446	-	9942	upstream
chr2	ALDBSSCT0000006060	ALDBSSCG0000003711	--	Annotated_lncRNA	147186389	147192155	+	ENSSSCT00000033615	ENSSSCG00000014349	TMEM173	transmembrane protein 173 [Source:HGNC Symbol;Acc:HGNC:27962]	147175198	147177252	-	9136	upstream
chr2	ALDBSSCT0000006060	ALDBSSCG0000003711	--	Annotated_lncRNA	147186389	147192155	+	ENSSSCT00000027520	ENSSSCG00000024934	--	--	147137156	147147197	-	39191	upstream
chr2	ALDBSSCT0000006068	ALDBSSCG0000003715	--	Annotated_lncRNA	147403790	147405025	+	ENSSSCT00000024841	ENSSSCG00000026374	UBE2D2	ubiquitin conjugating enzyme E2D 2 [Source:HGNC Symbol;Acc:HGNC:12475]	147424679	147434964	-	19653	downstream
chr2	ALDBSSCT0000006068	ALDBSSCG0000003715	--	Annotated_lncRNA	147403790	147405025	+	ENSSSCT00000015688	ENSSSCG00000014359	PSD2	pleckstrin and Sec7 domain containing 2 [Source:HGNC Symbol;Acc:HGNC:19092]	147280801	147307996	+	95793	downstream
chr2	ALDBSSCT0000006068	ALDBSSCG0000003715	--	Annotated_lncRNA	147403790	147405025	+	ENSSSCT00000015686	ENSSSCG00000014357	CXXC5	CXXC finger protein 5 [Source:HGNC Symbol;Acc:HGNC:26943]	147317594	147321676	+	82113	downstream
chr16	ALDBSSCT0000005086	ALDBSSCG0000003065	--	Annotated_lncRNA	82411093	82413437	-	ENSSSCT00000018626	ENSSSCG00000017108	--	--	82434351	82446247	+	20913	upstream
chr16	ALDBSSCT0000005086	ALDBSSCG0000003065	--	Annotated_lncRNA	82411093	82413437	-	ENSSSCT00000029358	ENSSSCG00000025115	--	--	82398052	82401790	-	9302	upstream
chr13	ALDBSSCT0000002836	ALDBSSCG0000001730	--	Annotated_lncRNA	150023878	150025327	+	ENSSSCT00000033659	ENSSSCG00000011899	CD80	CD80 molecule [Source:HGNC Symbol;Acc:HGNC:1700]	150034412	150044259	-	9084	downstream
chr13	ALDBSSCT0000002836	ALDBSSCG0000001730	--	Annotated_lncRNA	150023878	150025327	+	ENSSSCT00000025065	ENSSSCG00000027064	--	--	150088607	150093394	-	63279	downstream
chr13	ALDBSSCT0000002836	ALDBSSCG0000001730	--	Annotated_lncRNA	150023878	150025327	+	ENSSSCT00000013021	ENSSSCG00000011899	CD80	CD80 molecule [Source:HGNC Symbol;Acc:HGNC:1700]	150034412	150044259	-	9084	downstream
chr13	ALDBSSCT0000002836	ALDBSSCG0000001730	--	Annotated_lncRNA	150023878	150025327	+	ENSSSCT00000013018	ENSSSCG00000011896	ADPRH	ADP-ribosylarginine hydrolase [Source:HGNC Symbol;Acc:HGNC:269]	150005104	150011761	-	12116	upstream
chr13	ALDBSSCT0000002836	ALDBSSCG0000001730	--	Annotated_lncRNA	150023878	150025327	+	ENSSSCT00000013019	ENSSSCG00000011897	--	--	150079283	150082324	-	53955	downstream
chr13	ALDBSSCT0000002836	ALDBSSCG0000001730	--	Annotated_lncRNA	150023878	150025327	+	ENSSSCT00000034815	ENSSSCG00000011899	CD80	CD80 molecule [Source:HGNC Symbol;Acc:HGNC:1700]	150037121	150044259	-	11793	downstream
chr13	ALDBSSCT0000002836	ALDBSSCG0000001730	--	Annotated_lncRNA	150023878	150025327	+	ENSSSCT00000013014	ENSSSCG00000011893	COX17	COX17, cytochrome c oxidase copper chaperone [Source:HGNC Symbol;Acc:HGNC:2264]	149914818	149925127	+	98750	downstream
chr13	ALDBSSCT0000002836	ALDBSSCG0000001730	--	Annotated_lncRNA	150023878	150025327	+	ENSSSCT00000013015	ENSSSCG00000011894	POPDC2	popeye domain containing 2 [Source:HGNC Symbol;Acc:HGNC:17648]	149932130	149951356	+	72521	downstream
chr13	ALDBSSCT0000002836	ALDBSSCG0000001730	--	Annotated_lncRNA	150023878	150025327	+	ENSSSCT00000013023	ENSSSCG00000011901	TMEM39A	transmembrane protein 39A [Source:HGNC Symbol;Acc:HGNC:25600]	150096807	150130576	+	71479	upstream
chr13	ALDBSSCT0000002836	ALDBSSCG0000001730	--	Annotated_lncRNA	150023878	150025327	+	ENSSSCT00000013017	ENSSSCG00000011895	PLA1A	phospholipase A1 member A [Source:HGNC Symbol;Acc:HGNC:17661]	149969016	149996425	-	27452	upstream
chr13	ALDBSSCT0000002835	ALDBSSCG0000001729	--	Annotated_lncRNA	147427560	147428834	+	ENSSSCT00000026709	ENSSSCG00000028575	--	--	147351811	147363473	-	64086	upstream
chr13	ALDBSSCT0000002835	ALDBSSCG0000001729	--	Annotated_lncRNA	147427560	147428834	+	ENSSSCT00000012987	ENSSSCG00000011873	HSPBAP1	HSPB (heat shock 27kDa) associated protein 1 [Source:HGNC Symbol;Acc:HGNC:16389]	147363862	147426629	+	930	downstream
chr13	ALDBSSCT0000002835	ALDBSSCG0000001729	--	Annotated_lncRNA	147427560	147428834	+	ENSSSCT00000012989	ENSSSCG00000011875	PARP15	poly(ADP-ribose) polymerase family member 15 [Source:HGNC Symbol;Acc:HGNC:26876]	147507155	147531686	-	78320	downstream
chr13	ALDBSSCT0000002835	ALDBSSCG0000001729	--	Annotated_lncRNA	147427560	147428834	+	ENSSSCT00000012988	ENSSSCG00000011874	PARP14	poly(ADP-ribose) polymerase family member 14 [Source:HGNC Symbol;Acc:HGNC:29232]	147430046	147483562	-	1211	downstream
chr13	ALDBSSCT0000002830	ALDBSSCG0000001724	--	Annotated_lncRNA	143232213	143236928	+	ENSSSCT00000012958	ENSSSCG00000011846	SLC51A	solute carrier family 51 alpha subunit [Source:HGNC Symbol;Acc:HGNC:29955]	143289637	143307618	-	52708	downstream
chr13	ALDBSSCT0000002830	ALDBSSCG0000001724	--	Annotated_lncRNA	143232213	143236928	+	ENSSSCT00000012959	ENSSSCG00000011847	ZDHHC19	zinc finger, DHHC-type containing 19 [Source:HGNC Symbol;Acc:HGNC:20713]	143313509	143323970	+	76580	upstream
chr13	ALDBSSCT0000002830	ALDBSSCG0000001724	--	Annotated_lncRNA	143232213	143236928	+	ENSSSCT00000026267	ENSSSCG00000023527	NRROS	negative regulator of reactive oxygen species [Source:HGNC Symbol;Acc:HGNC:24613]	143119131	143144054	-	88158	upstream
chr13	ALDBSSCT0000002830	ALDBSSCG0000001724	--	Annotated_lncRNA	143232213	143236928	+	ENSSSCT00000012957	ENSSSCG00000011845	PCYT1A	phosphate cytidylyltransferase 1, choline, alpha [Source:HGNC Symbol;Acc:HGNC:8754]	143238518	143288872	+	1589	upstream
chr4	ALDBSSCT0000007957	ALDBSSCG0000004823	--	Annotated_lncRNA	55302085	55304394	-	ENSSSCT00000006730	ENSSSCG00000006137	WWP1	WW domain containing E3 ubiquitin protein ligase 1 [Source:HGNC Symbol;Acc:HGNC:17004]	55305131	55403541	-	736	downstream
chr4	ALDBSSCT0000007957	ALDBSSCG0000004823	--	Annotated_lncRNA	55302085	55304394	-	ENSSSCT00000006728	ENSSSCG00000006135	CPNE3	copine III [Source:HGNC Symbol;Acc:HGNC:2316]	55192067	55251263	-	50821	upstream
chr4	ALDBSSCT0000007957	ALDBSSCG0000004823	--	Annotated_lncRNA	55302085	55304394	-	ENSSSCT00000006729	ENSSSCG00000006136	RMDN1	regulator of microtubule dynamics 1 [Source:HGNC Symbol;Acc:HGNC:24285]	55260809	55298662	+	3422	downstream
chr1	ALDBSSCT0000000679	ALDBSSCG0000000409	--	Annotated_lncRNA	31515310	31522414	-	ENSSSCT00000004603	ENSSSCG00000004164	MTFR2	mitochondrial fission regulator 2 [Source:HGNC Symbol;Acc:HGNC:21115]	31470187	31485034	-	30275	upstream
chr1	ALDBSSCT0000000679	ALDBSSCG0000000409	--	Annotated_lncRNA	31515310	31522414	-	ENSSSCT00000004602	ENSSSCG00000004163	BCLAF1	BCL2-associated transcription factor 1 [Source:HGNC Symbol;Acc:HGNC:16863]	31490843	31513300	-	2009	upstream
chr1	ALDBSSCT0000000679	ALDBSSCG0000000409	--	Annotated_lncRNA	31515310	31522414	-	ENSSSCT00000004604	ENSSSCG00000004165	PDE7B	phosphodiesterase 7B [Source:HGNC Symbol;Acc:HGNC:8792]	31384824	31434786	+	80523	downstream
chr1	ALDBSSCT0000000678	ALDBSSCG0000000408	--	Annotated_lncRNA	31297848	31298556	-	ENSSSCT00000004604	ENSSSCG00000004165	PDE7B	phosphodiesterase 7B [Source:HGNC Symbol;Acc:HGNC:8792]	31384824	31434786	+	86267	upstream
GL892541.1	LNC_000010	XLOC_000406	--	Novel_lncRNA	1922	10633	+	ENSSSCT00000009900	ENSSSCG00000009040	SMAD1	SMAD family member 1 [Source:HGNC Symbol;Acc:HGNC:6767]	11931	31371	-	1297	downstream
GL892789.1	LNC_000019	XLOC_000616	--	Novel_lncRNA	93504	94556	+	ENSSSCT00000002180	ENSSSCG00000001948	RALGAPA1	Ral GTPase activating protein, alpha subunit 1 (catalytic) [Source:HGNC Symbol;Acc:HGNC:17770]	2844	29307	+	64196	downstream
GL892789.1	LNC_000019	XLOC_000616	--	Novel_lncRNA	93504	94556	+	ENSSSCT00000024459	ENSSSCG00000001948	RALGAPA1	Ral GTPase activating protein, alpha subunit 1 (catalytic) [Source:HGNC Symbol;Acc:HGNC:17770]	2844	51900	+	41603	downstream
chr18	ALDBSSCT0000005443	ALDBSSCG0000003296	--	Annotated_lncRNA	6671950	6676963	+	ENSSSCT00000036607	ENSSSCG00000016448	KCNH2	potassium channel, voltage gated eag related subfamily H, member 2 [Source:HGNC Symbol;Acc:HGNC:6251]	6719117	6725284	-	42153	downstream
chr18	ALDBSSCT0000005443	ALDBSSCG0000003296	--	Annotated_lncRNA	6671950	6676963	+	ENSSSCT00000029678	ENSSSCG00000024431	ATG9B	autophagy related 9B [Source:HGNC Symbol;Acc:HGNC:21899]	6570674	6578321	+	93628	downstream
chr18	ALDBSSCT0000005443	ALDBSSCG0000003296	--	Annotated_lncRNA	6671950	6676963	+	ENSSSCT00000028367	ENSSSCG00000016444	TMEM176B	transmembrane protein 176B [Source:HGNC Symbol;Acc:HGNC:29596]	6650912	6657271	+	14678	downstream
chr18	ALDBSSCT0000005443	ALDBSSCG0000003296	--	Annotated_lncRNA	6671950	6676963	+	ENSSSCT00000017906	ENSSSCG00000016444	TMEM176B	transmembrane protein 176B [Source:HGNC Symbol;Acc:HGNC:29596]	6650912	6657271	+	14678	downstream
chr18	ALDBSSCT0000005443	ALDBSSCG0000003296	--	Annotated_lncRNA	6671950	6676963	+	ENSSSCT00000017911	ENSSSCG00000016448	KCNH2	potassium channel, voltage gated eag related subfamily H, member 2 [Source:HGNC Symbol;Acc:HGNC:6251]	6721957	6725583	-	44993	downstream
chr18	ALDBSSCT0000005443	ALDBSSCG0000003296	--	Annotated_lncRNA	6671950	6676963	+	ENSSSCT00000017905	ENSSSCG00000016443	TMEM176A	transmembrane protein 176A [Source:HGNC Symbol;Acc:HGNC:24930]	6647497	6650873	-	21076	upstream
chr18	ALDBSSCT0000005443	ALDBSSCG0000003296	--	Annotated_lncRNA	6671950	6676963	+	ENSSSCT00000031757	ENSSSCG00000027196	GIMAP6	GTPase, IMAP family member 6 [Source:HGNC Symbol;Acc:HGNC:21918]	6629467	6635745	-	36204	upstream
chr18	ALDBSSCT0000005443	ALDBSSCG0000003296	--	Annotated_lncRNA	6671950	6676963	+	ENSSSCT00000017903	ENSSSCG00000016442	AOC1	amine oxidase, copper containing 1 [Source:HGNC Symbol;Acc:HGNC:80]	6741254	6749392	+	64290	upstream
chr18	ALDBSSCT0000005443	ALDBSSCG0000003296	--	Annotated_lncRNA	6671950	6676963	+	ENSSSCT00000017913	ENSSSCG00000016450	NOS3	nitric oxide synthase, endothelial [Source:RefSeq peptide;Acc:NP_999460]	6579251	6597271	-	74678	upstream
chr18	ALDBSSCT0000005443	ALDBSSCG0000003296	--	Annotated_lncRNA	6671950	6676963	+	ENSSSCT00000017912	ENSSSCG00000016449	GIMAP2	GTPase, IMAP family member 2 [Source:HGNC Symbol;Acc:HGNC:21789]	6731369	6733669	-	54405	downstream
chr18	ALDBSSCT0000005443	ALDBSSCG0000003296	--	Annotated_lncRNA	6671950	6676963	+	ENSSSCT00000026032	ENSSSCG00000027826	GIMAP4	GTPase, IMAP family member 4 [Source:HGNC Symbol;Acc:HGNC:21872]	6618395	6619630	+	52319	downstream
chr3	ALDBSSCT0000006669	ALDBSSCG0000004077	--	Annotated_lncRNA	41514839	41525893	+	ENSSSCT00000033768	ENSSSCG00000008003	HAGHL	hydroxyacylglutathione hydrolase-like [Source:HGNC Symbol;Acc:HGNC:14177]	41426451	41427674	+	87164	downstream
chr3	ALDBSSCT0000006669	ALDBSSCG0000004077	--	Annotated_lncRNA	41514839	41525893	+	ENSSSCT00000008779	ENSSSCG00000008011	GNG13	guanine nucleotide binding protein (G protein), gamma 13 [Source:HGNC Symbol;Acc:HGNC:14131]	41476392	41476740	-	38098	upstream
chr3	ALDBSSCT0000006669	ALDBSSCG0000004077	--	Annotated_lncRNA	41514839	41525893	+	ENSSSCT00000008778	ENSSSCG00000008010	CHTF18	chromosome transmission fidelity factor 18 [Source:HGNC Symbol;Acc:HGNC:18435]	41468380	41476142	+	38696	downstream
chr3	ALDBSSCT0000006669	ALDBSSCG0000004077	--	Annotated_lncRNA	41514839	41525893	+	ENSSSCT00000008768	ENSSSCG00000008000	RPUSD1	RNA pseudouridylate synthase domain containing 1 [Source:HGNC Symbol;Acc:HGNC:14173]	41465703	41468134	-	46704	upstream
chr3	ALDBSSCT0000006669	ALDBSSCG0000004077	--	Annotated_lncRNA	41514839	41525893	+	ENSSSCT00000008769	ENSSSCG00000008001	MSLN	mesothelin [Source:HGNC Symbol;Acc:HGNC:7371]	41448662	41452015	+	62823	downstream
chr3	ALDBSSCT0000006669	ALDBSSCG0000004077	--	Annotated_lncRNA	41514839	41525893	+	ENSSSCT00000008777	ENSSSCG00000008009	LMF1	lipase maturation factor 1 [Source:HGNC Symbol;Acc:HGNC:14154]	41548506	41564662	-	22612	downstream
chr3	ALDBSSCT0000006669	ALDBSSCG0000004077	--	Annotated_lncRNA	41514839	41525893	+	ENSSSCT00000008771	ENSSSCG00000008003	HAGHL	hydroxyacylglutathione hydrolase-like [Source:HGNC Symbol;Acc:HGNC:14177]	41424826	41428259	+	86579	downstream
chr3	ALDBSSCT0000006669	ALDBSSCG0000004077	--	Annotated_lncRNA	41514839	41525893	+	ENSSSCT00000008770	ENSSSCG00000008002	NARFL	nuclear prelamin A recognition factor-like [Source:HGNC Symbol;Acc:HGNC:14179]	41428516	41435243	-	79595	upstream
chr3	ALDBSSCT0000006669	ALDBSSCG0000004077	--	Annotated_lncRNA	41514839	41525893	+	ENSSSCT00000008773	ENSSSCG00000008005	METRN	meteorin, glial cell differentiation regulator [Source:HGNC Symbol;Acc:HGNC:14151]	41413631	41415687	+	99151	downstream
chr3	ALDBSSCT0000006669	ALDBSSCG0000004077	--	Annotated_lncRNA	41514839	41525893	+	ENSSSCT00000008772	ENSSSCG00000008004	FAM173A	family with sequence similarity 173 member A [Source:HGNC Symbol;Acc:HGNC:14152]	41418621	41422752	+	92086	downstream
chr3	ALDBSSCT0000006669	ALDBSSCG0000004077	--	Annotated_lncRNA	41514839	41525893	+	ENSSSCT00000032942	ENSSSCG00000008003	HAGHL	hydroxyacylglutathione hydrolase-like [Source:HGNC Symbol;Acc:HGNC:14177]	41424392	41426468	+	88370	downstream
chr3	ALDBSSCT0000006669	ALDBSSCG0000004077	--	Annotated_lncRNA	41514839	41525893	+	ENSSSCT00000008783	ENSSSCG00000008015	SPSB3	splA/ryanodine receptor domain and SOCS box containing 3 [Source:HGNC Symbol;Acc:HGNC:30629]	41622664	41625791	-	96770	downstream
chr3	ALDBSSCT0000006669	ALDBSSCG0000004077	--	Annotated_lncRNA	41514839	41525893	+	ENSSSCT00000033264	ENSSSCG00000008003	HAGHL	hydroxyacylglutathione hydrolase-like [Source:HGNC Symbol;Acc:HGNC:14177]	41424446	41426511	+	88327	downstream
chr3	ALDBSSCT0000006669	ALDBSSCG0000004077	--	Annotated_lncRNA	41514839	41525893	+	ENSSSCT00000036112	ENSSSCG00000008003	HAGHL	hydroxyacylglutathione hydrolase-like [Source:HGNC Symbol;Acc:HGNC:14177]	41424826	41427874	+	86964	downstream
chr3	ALDBSSCT0000006669	ALDBSSCG0000004077	--	Annotated_lncRNA	41514839	41525893	+	ENSSSCT00000035492	ENSSSCG00000008003	HAGHL	hydroxyacylglutathione hydrolase-like [Source:HGNC Symbol;Acc:HGNC:14177]	41424154	41427627	+	87211	downstream
chr3	ALDBSSCT0000006669	ALDBSSCG0000004077	--	Annotated_lncRNA	41514839	41525893	+	ENSSSCT00000023757	ENSSSCG00000023487	MSLNL	mesothelin-like [Source:HGNC Symbol;Acc:HGNC:14170]	41452706	41460404	-	54434	upstream
chr3	ALDBSSCT0000006669	ALDBSSCG0000004077	--	Annotated_lncRNA	41514839	41525893	+	ENSSSCT00000031631	ENSSSCG00000008010	CHTF18	chromosome transmission fidelity factor 18 [Source:HGNC Symbol;Acc:HGNC:18435]	41468267	41476142	+	38696	downstream
chr3	ALDBSSCT0000006669	ALDBSSCG0000004077	--	Annotated_lncRNA	41514839	41525893	+	ENSSSCT00000033244	ENSSSCG00000008003	HAGHL	hydroxyacylglutathione hydrolase-like [Source:HGNC Symbol;Acc:HGNC:14177]	41426720	41427693	+	87145	downstream
chr1	ALDBSSCT0000000900	ALDBSSCG0000000546	--	Annotated_lncRNA	187481152	187482550	-	ENSSSCT00000023869	ENSSSCG00000021112	--	--	187485435	187623277	-	2884	downstream
chr1	ALDBSSCT0000000453	ALDBSSCG0000000271	--	Annotated_lncRNA	245207022	245237825	+	ENSSSCT00000005764	ENSSSCG00000005230	--	--	245167561	245169333	+	37688	downstream
chr4	ALDBSSCT0000007483	ALDBSSCG0000004537	--	Annotated_lncRNA	21883404	21888554	+	ENSSSCT00000006592	ENSSSCG00000006008	--	--	21861054	21861897	-	21506	upstream
chr4	ALDBSSCT0000007482	ALDBSSCG0000004536	--	Annotated_lncRNA	21846600	21851209	+	ENSSSCT00000006592	ENSSSCG00000006008	--	--	21861054	21861897	-	9844	downstream
chr9	ALDBSSCT0000011146	ALDBSSCG0000006761	--	Annotated_lncRNA	38416587	38417220	+	ENSSSCT00000016358	ENSSSCG00000014995	DDI1	DNA damage inducible 1 homolog 1 [Source:HGNC Symbol;Acc:HGNC:18961]	38497415	38498620	+	80194	upstream
chr9	ALDBSSCT0000011146	ALDBSSCG0000006761	--	Annotated_lncRNA	38416587	38417220	+	ENSSSCT00000016357	ENSSSCG00000014994	PDGFD	platelet derived growth factor D [Source:HGNC Symbol;Acc:HGNC:30620]	38454987	38615959	-	37766	downstream
chr12	ENSSSCT00000033840	ENSSSCG00000017791	SSH2	Annotated_lncRNA	47804289	47871712	+	ENSSSCT00000019360	ENSSSCG00000017788	TP53I13	tumor protein p53 inducible protein 13 [Source:HGNC Symbol;Acc:HGNC:25102]	47714658	47718800	+	85488	downstream
chr12	ENSSSCT00000033840	ENSSSCG00000017791	SSH2	Annotated_lncRNA	47804289	47871712	+	ENSSSCT00000019361	ENSSSCG00000017789	ABHD15	abhydrolase domain containing 15 [Source:HGNC Symbol;Acc:HGNC:26971]	47708133	47713196	-	91092	upstream
chr12	ENSSSCT00000033840	ENSSSCG00000017791	SSH2	Annotated_lncRNA	47804289	47871712	+	ENSSSCT00000019359	ENSSSCG00000017787	GIT1	G protein-coupled receptor kinase interacting ArfGAP 1 [Source:HGNC Symbol;Acc:HGNC:4272]	47720409	47728866	-	75422	upstream
chr12	ENSSSCT00000033840	ENSSSCG00000017791	SSH2	Annotated_lncRNA	47804289	47871712	+	ENSSSCT00000019365	ENSSSCG00000017793	--	--	47940122	47946308	+	68409	upstream
chr12	ENSSSCT00000033840	ENSSSCG00000017791	SSH2	Annotated_lncRNA	47804289	47871712	+	ENSSSCT00000019364	ENSSSCG00000017792	--	--	47947667	47949200	-	75954	downstream
chr10	ALDBSSCT0000001478	ALDBSSCG0000000894	--	Annotated_lncRNA	31420928	31421786	-	ENSSSCT00000023985	ENSSSCG00000024719	--	--	31343003	31364342	-	56585	upstream
chr10	ALDBSSCT0000001478	ALDBSSCG0000000894	--	Annotated_lncRNA	31420928	31421786	-	ENSSSCT00000011977	ENSSSCG00000010943	--	--	31509240	31670349	-	87453	downstream
chr10	ALDBSSCT0000001476	ALDBSSCG0000000892	--	Annotated_lncRNA	30841605	30845210	-	ENSSSCT00000029331	ENSSSCG00000027312	PTCH1	patched 1 [Source:HGNC Symbol;Acc:HGNC:9585]	30847386	30915236	+	2175	upstream
chr14	ALDBSSCT0000004117	ALDBSSCG0000002479	--	Annotated_lncRNA	151129749	151166395	-	ENSSSCT00000011771	ENSSSCG00000010759	GLRX3	glutaredoxin 3 [Source:HGNC Symbol;Acc:HGNC:15987]	151189225	151224799	+	22829	upstream
chr14	ALDBSSCT0000004117	ALDBSSCG0000002479	--	Annotated_lncRNA	151129749	151166395	-	ENSSSCT00000011769	ENSSSCG00000010757	EBF3	early B-cell factor 3 [Source:HGNC Symbol;Acc:HGNC:19087]	150935646	151052955	-	76793	upstream
chr4	ALDBSSCT0000007823	ALDBSSCG0000004738	--	Annotated_lncRNA	1319218	1324513	-	ENSSSCT00000007626	ENSSSCG00000006961	LY6H	lymphocyte antigen 6 complex, locus H [Source:HGNC Symbol;Acc:HGNC:6728]	1359707	1361950	+	35193	upstream
chr4	ALDBSSCT0000007823	ALDBSSCG0000004738	--	Annotated_lncRNA	1319218	1324513	-	ENSSSCT00000029847	ENSSSCG00000006961	LY6H	lymphocyte antigen 6 complex, locus H [Source:HGNC Symbol;Acc:HGNC:6728]	1359812	1361950	+	35298	upstream
chr4	ALDBSSCT0000007823	ALDBSSCG0000004738	--	Annotated_lncRNA	1319218	1324513	-	ENSSSCT00000007625	ENSSSCG00000006960	GLI4	GLI family zinc finger 4 [Source:HGNC Symbol;Acc:HGNC:4320]	1305245	1310216	-	9001	upstream
chr4	ALDBSSCT0000007823	ALDBSSCG0000004738	--	Annotated_lncRNA	1319218	1324513	-	ENSSSCT00000007623	ENSSSCG00000006958	--	--	1422124	1436539	+	97610	upstream
chr4	ALDBSSCT0000007823	ALDBSSCG0000004738	--	Annotated_lncRNA	1319218	1324513	-	ENSSSCT00000031224	ENSSSCG00000006960	GLI4	GLI family zinc finger 4 [Source:HGNC Symbol;Acc:HGNC:4320]	1305245	1306958	-	12259	upstream
chr4	ALDBSSCT0000007823	ALDBSSCG0000004738	--	Annotated_lncRNA	1319218	1324513	-	ENSSSCT00000025766	ENSSSCG00000027691	--	--	1182114	1228788	-	90429	upstream
chr4	ALDBSSCT0000007823	ALDBSSCG0000004738	--	Annotated_lncRNA	1319218	1324513	-	ENSSSCT00000025104	ENSSSCG00000006960	GLI4	GLI family zinc finger 4 [Source:HGNC Symbol;Acc:HGNC:4320]	1305245	1310216	-	9001	upstream
chr4	ALDBSSCT0000007822	ALDBSSCG0000004737	--	Annotated_lncRNA	1310864	1311340	-	ENSSSCT00000007626	ENSSSCG00000006961	LY6H	lymphocyte antigen 6 complex, locus H [Source:HGNC Symbol;Acc:HGNC:6728]	1359707	1361950	+	48366	upstream
chr4	ALDBSSCT0000007822	ALDBSSCG0000004737	--	Annotated_lncRNA	1310864	1311340	-	ENSSSCT00000029847	ENSSSCG00000006961	LY6H	lymphocyte antigen 6 complex, locus H [Source:HGNC Symbol;Acc:HGNC:6728]	1359812	1361950	+	48471	upstream
chr4	ALDBSSCT0000007822	ALDBSSCG0000004737	--	Annotated_lncRNA	1310864	1311340	-	ENSSSCT00000007625	ENSSSCG00000006960	GLI4	GLI family zinc finger 4 [Source:HGNC Symbol;Acc:HGNC:4320]	1305245	1310216	-	647	upstream
chr4	ALDBSSCT0000007822	ALDBSSCG0000004737	--	Annotated_lncRNA	1310864	1311340	-	ENSSSCT00000031224	ENSSSCG00000006960	GLI4	GLI family zinc finger 4 [Source:HGNC Symbol;Acc:HGNC:4320]	1305245	1306958	-	3905	upstream
chr4	ALDBSSCT0000007822	ALDBSSCG0000004737	--	Annotated_lncRNA	1310864	1311340	-	ENSSSCT00000025766	ENSSSCG00000027691	--	--	1182114	1228788	-	82075	upstream
chr4	ALDBSSCT0000007822	ALDBSSCG0000004737	--	Annotated_lncRNA	1310864	1311340	-	ENSSSCT00000025104	ENSSSCG00000006960	GLI4	GLI family zinc finger 4 [Source:HGNC Symbol;Acc:HGNC:4320]	1305245	1310216	-	647	upstream
chr1	ALDBSSCT0000000293	ALDBSSCG0000000168	--	Annotated_lncRNA	142577396	142578248	+	ENSSSCT00000005193	ENSSSCG00000004702	STRC	stereocilin [Source:HGNC Symbol;Acc:HGNC:16035]	142665471	142681931	+	87222	upstream
chr1	ALDBSSCT0000000293	ALDBSSCG0000000168	--	Annotated_lncRNA	142577396	142578248	+	ENSSSCT00000005190	ENSSSCG00000004700	PDIA3	protein disulfide isomerase family A member 3 [Source:HGNC Symbol;Acc:HGNC:4606]	142615686	142643747	-	37437	downstream
chr1	ALDBSSCT0000000293	ALDBSSCG0000000168	--	Annotated_lncRNA	142577396	142578248	+	ENSSSCT00000005191	ENSSSCG00000004701	CATSPER2	cation channel, sperm associated 2 [Source:HGNC Symbol;Acc:HGNC:18810]	142644213	142658308	+	65964	upstream
chr1	ALDBSSCT0000000293	ALDBSSCG0000000168	--	Annotated_lncRNA	142577396	142578248	+	ENSSSCT00000005185	ENSSSCG00000004695	WDR76	WD repeat domain 76 [Source:HGNC Symbol;Acc:HGNC:25773]	142483492	142568978	-	8417	upstream
chr1	ALDBSSCT0000000293	ALDBSSCG0000000168	--	Annotated_lncRNA	142577396	142578248	+	ENSSSCT00000005187	ENSSSCG00000004697	HYPK	huntingtin interacting protein K [Source:HGNC Symbol;Acc:HGNC:18418]	142587865	142589341	-	9616	downstream
chr1	ALDBSSCT0000000293	ALDBSSCG0000000168	--	Annotated_lncRNA	142577396	142578248	+	ENSSSCT00000005189	ENSSSCG00000004699	ELL3	elongation factor RNA polymerase II-like 3 [Source:HGNC Symbol;Acc:HGNC:23113]	142610892	142614315	+	32643	upstream
chr1	ALDBSSCT0000000293	ALDBSSCG0000000168	--	Annotated_lncRNA	142577396	142578248	+	ENSSSCT00000005188	ENSSSCG00000004698	SERINC4	serine incorporator 4 [Source:HGNC Symbol;Acc:HGNC:32237]	142589884	142594314	+	11635	upstream
chr1	ALDBSSCT0000000293	ALDBSSCG0000000168	--	Annotated_lncRNA	142577396	142578248	+	ENSSSCT00000031142	ENSSSCG00000024263	--	--	142595270	142597028	-	17021	downstream
chr1	ALDBSSCT0000000293	ALDBSSCG0000000168	--	Annotated_lncRNA	142577396	142578248	+	ENSSSCT00000028070	ENSSSCG00000004698	SERINC4	serine incorporator 4 [Source:HGNC Symbol;Acc:HGNC:32237]	142590238	142594024	+	11989	upstream
chr1	ALDBSSCT0000000293	ALDBSSCG0000000168	--	Annotated_lncRNA	142577396	142578248	+	ENSSSCT00000029233	ENSSSCG00000025604	--	--	142576041	142576181	+	1214	downstream
chr1	ALDBSSCT0000000295	ALDBSSCG0000000169	--	Annotated_lncRNA	142835400	142837817	+	ENSSSCT00000005200	ENSSSCG00000004708	TUBGCP4	tubulin gamma complex associated protein 4 [Source:HGNC Symbol;Acc:HGNC:16691]	142887937	142940923	-	50119	downstream
chr1	ALDBSSCT0000000295	ALDBSSCG0000000169	--	Annotated_lncRNA	142835400	142837817	+	ENSSSCT00000005197	ENSSSCG00000004706	--	--	142814194	142825616	+	9783	downstream
chr1	ALDBSSCT0000000295	ALDBSSCG0000000169	--	Annotated_lncRNA	142835400	142837817	+	ENSSSCT00000005196	ENSSSCG00000004705	--	--	142764559	142773289	-	62110	upstream
chr1	ALDBSSCT0000000295	ALDBSSCG0000000169	--	Annotated_lncRNA	142835400	142837817	+	ENSSSCT00000027386	ENSSSCG00000004705	--	--	142764559	142773289	-	62110	upstream
chr1	ALDBSSCT0000000295	ALDBSSCG0000000169	--	Annotated_lncRNA	142835400	142837817	+	ENSSSCT00000005195	ENSSSCG00000004704	PPIP5K1	diphosphoinositol pentakisphosphate kinase 1 [Source:HGNC Symbol;Acc:HGNC:29023]	142717637	142760945	+	74454	downstream
chr5	ALDBSSCT0000008522	ALDBSSCG0000005185	--	Annotated_lncRNA	20091141	20097043	-	ENSSSCT00000000303	ENSSSCG00000000282	--	--	19983104	19993994	+	97146	downstream
chr5	ALDBSSCT0000008522	ALDBSSCG0000005185	--	Annotated_lncRNA	20091141	20097043	-	ENSSSCT00000028782	ENSSSCG00000027996	--	--	20147090	20148458	+	50046	upstream
chr5	ALDBSSCT0000008522	ALDBSSCG0000005185	--	Annotated_lncRNA	20091141	20097043	-	ENSSSCT00000000306	ENSSSCG00000000285	HOXC4	homeobox C4 [Source:HGNC Symbol;Acc:HGNC:5126]	20167539	20169650	+	70495	upstream
chr5	ALDBSSCT0000008522	ALDBSSCG0000005185	--	Annotated_lncRNA	20091141	20097043	-	ENSSSCT00000032497	ENSSSCG00000024221	SMUG1	single-strand-selective monofunctional uracil-DNA glycosylase 1 [Source:HGNC Symbol;Acc:HGNC:17148]	20042388	20050218	+	40922	downstream
chr4	ALDBSSCT0000007825	ALDBSSCG0000004740	--	Annotated_lncRNA	1448002	1450982	-	ENSSSCT00000007626	ENSSSCG00000006961	LY6H	lymphocyte antigen 6 complex, locus H [Source:HGNC Symbol;Acc:HGNC:6728]	1359707	1361950	+	86051	downstream
chr4	ALDBSSCT0000007825	ALDBSSCG0000004740	--	Annotated_lncRNA	1448002	1450982	-	ENSSSCT00000029847	ENSSSCG00000006961	LY6H	lymphocyte antigen 6 complex, locus H [Source:HGNC Symbol;Acc:HGNC:6728]	1359812	1361950	+	86051	downstream
chr4	ALDBSSCT0000007825	ALDBSSCG0000004740	--	Annotated_lncRNA	1448002	1450982	-	ENSSSCT00000007624	ENSSSCG00000006959	ZNF696	zinc finger protein 696 [Source:HGNC Symbol;Acc:HGNC:25872]	1444379	1445383	-	2618	upstream
chr4	ALDBSSCT0000007825	ALDBSSCG0000004740	--	Annotated_lncRNA	1448002	1450982	-	ENSSSCT00000007623	ENSSSCG00000006958	--	--	1422124	1436539	+	11462	downstream
chr4	ALDBSSCT0000007825	ALDBSSCG0000004740	--	Annotated_lncRNA	1448002	1450982	-	ENSSSCT00000006508	ENSSSCG00000005928	MROH5	maestro heat-like repeat family member 5 [Source:HGNC Symbol;Acc:HGNC:42976]	1546907	1565550	+	95924	upstream
chr4	ALDBSSCT0000007825	ALDBSSCG0000004740	--	Annotated_lncRNA	1448002	1450982	-	ENSSSCT00000027091	ENSSSCG00000005928	MROH5	maestro heat-like repeat family member 5 [Source:HGNC Symbol;Acc:HGNC:42976]	1546907	1565550	+	95924	upstream
chr4	ALDBSSCT0000007824	ALDBSSCG0000004739	--	Annotated_lncRNA	1324676	1325698	-	ENSSSCT00000007626	ENSSSCG00000006961	LY6H	lymphocyte antigen 6 complex, locus H [Source:HGNC Symbol;Acc:HGNC:6728]	1359707	1361950	+	34008	upstream
chr4	ALDBSSCT0000007824	ALDBSSCG0000004739	--	Annotated_lncRNA	1324676	1325698	-	ENSSSCT00000029847	ENSSSCG00000006961	LY6H	lymphocyte antigen 6 complex, locus H [Source:HGNC Symbol;Acc:HGNC:6728]	1359812	1361950	+	34113	upstream
chr4	ALDBSSCT0000007824	ALDBSSCG0000004739	--	Annotated_lncRNA	1324676	1325698	-	ENSSSCT00000007625	ENSSSCG00000006960	GLI4	GLI family zinc finger 4 [Source:HGNC Symbol;Acc:HGNC:4320]	1305245	1310216	-	14459	upstream
chr4	ALDBSSCT0000007824	ALDBSSCG0000004739	--	Annotated_lncRNA	1324676	1325698	-	ENSSSCT00000007623	ENSSSCG00000006958	--	--	1422124	1436539	+	96425	upstream
chr4	ALDBSSCT0000007824	ALDBSSCG0000004739	--	Annotated_lncRNA	1324676	1325698	-	ENSSSCT00000031224	ENSSSCG00000006960	GLI4	GLI family zinc finger 4 [Source:HGNC Symbol;Acc:HGNC:4320]	1305245	1306958	-	17717	upstream
chr4	ALDBSSCT0000007824	ALDBSSCG0000004739	--	Annotated_lncRNA	1324676	1325698	-	ENSSSCT00000025766	ENSSSCG00000027691	--	--	1182114	1228788	-	95887	upstream
chr4	ALDBSSCT0000007824	ALDBSSCG0000004739	--	Annotated_lncRNA	1324676	1325698	-	ENSSSCT00000025104	ENSSSCG00000006960	GLI4	GLI family zinc finger 4 [Source:HGNC Symbol;Acc:HGNC:4320]	1305245	1310216	-	14459	upstream
chr3	ALDBSSCT0000006846	ALDBSSCG0000004172	--	Annotated_lncRNA	118425369	118427956	+	ENSSSCT00000009354	ENSSSCG00000008549	SLC4A1AP	solute carrier family 4 (anion exchanger), member 1, adaptor protein [Source:HGNC Symbol;Acc:HGNC:13813]	118469853	118497711	-	41896	downstream
chr3	ALDBSSCT0000006846	ALDBSSCG0000004172	--	Annotated_lncRNA	118425369	118427956	+	ENSSSCT00000009351	ENSSSCG00000008546	GPN1	GPN-loop GTPase 1 [Source:HGNC Symbol;Acc:HGNC:17030]	118507937	118531399	-	79980	downstream
chr3	ALDBSSCT0000006846	ALDBSSCG0000004172	--	Annotated_lncRNA	118425369	118427956	+	ENSSSCT00000009353	ENSSSCG00000008548	SUPT7L	SPT7-like STAGA complex gamma subunit [Source:HGNC Symbol;Acc:HGNC:30632]	118499106	118508670	+	71149	upstream
chr9	ALDBSSCT0000011118	ALDBSSCG0000006750	--	Annotated_lncRNA	30728057	30732233	+	ENSSSCT00000016321	ENSSSCG00000014960	AMOTL1	angiomotin like 1 [Source:HGNC Symbol;Acc:HGNC:17811]	30651655	30726848	+	1208	downstream
chr9	ALDBSSCT0000011118	ALDBSSCG0000006750	--	Annotated_lncRNA	30728057	30732233	+	ENSSSCT00000016323	ENSSSCG00000026272	--	--	30826134	30827701	+	93900	upstream
chr9	ALDBSSCT0000011118	ALDBSSCG0000006750	--	Annotated_lncRNA	30728057	30732233	+	ENSSSCT00000016322	ENSSSCG00000014961	CWC15	CWC15 spliceosome-associated protein [Source:HGNC Symbol;Acc:HGNC:26939]	30788867	30800677	-	56633	downstream
chr3	ALDBSSCT0000006840	ALDBSSCG0000004170	--	Annotated_lncRNA	117297923	117302330	+	ENSSSCT00000029718	ENSSSCG00000030147	--	--	117217369	117220542	+	77380	downstream
chr3	ALDBSSCT0000006840	ALDBSSCG0000004170	--	Annotated_lncRNA	117297923	117302330	+	ENSSSCT00000009343	ENSSSCG00000008539	--	--	117279555	117287358	+	10564	downstream
chr3	ALDBSSCT0000006840	ALDBSSCG0000004170	--	Annotated_lncRNA	117297923	117302330	+	ENSSSCT00000009342	ENSSSCG00000008538	SPDYA	speedy/RINGO cell cycle regulator family member A [Source:HGNC Symbol;Acc:HGNC:30613]	117219574	117244540	-	53382	upstream
chr3	ALDBSSCT0000006840	ALDBSSCG0000004170	--	Annotated_lncRNA	117297923	117302330	+	ENSSSCT00000009341	ENSSSCG00000008537	--	--	117197476	117206264	-	91658	upstream
chr3	ALDBSSCT0000006840	ALDBSSCG0000004170	--	Annotated_lncRNA	117297923	117302330	+	ENSSSCT00000009346	ENSSSCG00000008541	PLB1	phospholipase B1 [Source:HGNC Symbol;Acc:HGNC:30041]	117360703	117371189	-	58372	downstream
chr3	ALDBSSCT0000006840	ALDBSSCG0000004170	--	Annotated_lncRNA	117297923	117302330	+	ENSSSCT00000009345	ENSSSCG00000008540	PPP1CB	serine/threonine-protein phosphatase PP1-beta catalytic subunit [Source:RefSeq peptide;Acc:NP_999349]	117257007	117275131	+	22791	downstream
chr3	LNC_000498	XLOC_043103	--	Novel_lncRNA	127277850	127542506	-	ENSSSCT00000009419	ENSSSCG00000008608	RDH14	retinol dehydrogenase 14 (all-trans/9-cis/11-cis) [Source:HGNC Symbol;Acc:HGNC:19979]	127542572	127547856	+	65	upstream
chr3	LNC_000498	XLOC_043103	--	Novel_lncRNA	127277850	127542506	-	ENSSSCT00000009418	ENSSSCG00000008607	--	--	127518234	127540107	+	-21874	antisense
chr9	ALDBSSCT0000011201	ALDBSSCG0000006801	--	Annotated_lncRNA	59043535	59050625	+	ENSSSCT00000028018	ENSSSCG00000022413	TIRAP	toll-interleukin 1 receptor (TIR) domain containing adaptor protein [Source:HGNC Symbol;Acc:HGNC:17192]	59051622	59056203	+	996	upstream
chr9	ALDBSSCT0000011201	ALDBSSCG0000006801	--	Annotated_lncRNA	59043535	59050625	+	ENSSSCT00000023210	ENSSSCG00000030017	FOXRED1	FAD-dependent oxidoreductase domain containing 1 [Source:HGNC Symbol;Acc:HGNC:26927]	59028736	59036373	+	7161	downstream
chr9	ALDBSSCT0000011201	ALDBSSCG0000006801	--	Annotated_lncRNA	59043535	59050625	+	ENSSSCT00000031087	ENSSSCG00000025806	--	--	58919681	58968398	+	75136	downstream
chr9	ALDBSSCT0000011201	ALDBSSCG0000006801	--	Annotated_lncRNA	59043535	59050625	+	ENSSSCT00000016597	ENSSSCG00000015231	DCPS	decapping enzyme, scavenger [Source:HGNC Symbol;Acc:HGNC:29812]	59064169	59101039	+	13543	upstream
chr9	ALDBSSCT0000011201	ALDBSSCG0000006801	--	Annotated_lncRNA	59043535	59050625	+	ENSSSCT00000016593	ENSSSCG00000015227	SRPRA	SRP receptor alpha subunit [Source:HGNC Symbol;Acc:HGNC:11307]	58968922	59028437	-	15097	upstream
chr9	ALDBSSCT0000011201	ALDBSSCG0000006801	--	Annotated_lncRNA	59043535	59050625	+	ENSSSCT00000016598	ENSSSCG00000015232	ST3GAL4	ST3 beta-galactoside alpha-2,3-sialyltransferase 4 [Source:HGNC Symbol;Acc:HGNC:10864]	59108821	59325616	+	58195	upstream
chr9	ALDBSSCT0000011207	ALDBSSCG0000006805	--	Annotated_lncRNA	61707516	61709121	+	ENSSSCT00000016603	ENSSSCG00000015237	--	--	61716477	61811066	+	7355	upstream
chr14	ALDBSSCT0000004022	ALDBSSCG0000002423	--	Annotated_lncRNA	108150901	108385209	-	ENSSSCT00000011418	ENSSSCG00000010433	SGMS1	sphingomyelin synthase 1 [Source:HGNC Symbol;Acc:HGNC:29799]	107988063	108105320	-	45580	upstream
chr14	ALDBSSCT0000004024	ALDBSSCG0000002425	--	Annotated_lncRNA	110488911	110494551	-	ENSSSCT00000011443	ENSSSCG00000010457	KIF20B	kinesin family member 20B [Source:HGNC Symbol;Acc:HGNC:7212]	110499118	110581337	+	4566	upstream
chr14	ALDBSSCT0000004024	ALDBSSCG0000002425	--	Annotated_lncRNA	110488911	110494551	-	ENSSSCT00000011442	ENSSSCG00000010456	PANK1	pantothenate kinase 1 [Source:HGNC Symbol;Acc:HGNC:8598]	110397901	110460603	-	28307	upstream
chr1	ALDBSSCT0000000051	ALDBSSCG0000000031	--	Annotated_lncRNA	15990126	15998337	+	ENSSSCT00000004510	ENSSSCG00000004081	SYNE1	spectrin repeat containing, nuclear envelope 1 [Source:HGNC Symbol;Acc:HGNC:17089]	16065606	16221209	-	67268	downstream
chr1	ALDBSSCT0000000051	ALDBSSCG0000000031	--	Annotated_lncRNA	15990126	15998337	+	ENSSSCT00000004509	ENSSSCG00000004080	MYCT1	myc target 1 [Source:HGNC Symbol;Acc:HGNC:23172]	15948007	15948519	-	41606	upstream
chr1	ALDBSSCT0000000051	ALDBSSCG0000000031	--	Annotated_lncRNA	15990126	15998337	+	ENSSSCT00000004507	ENSSSCG00000004078	VIP	vasoactive intestinal peptide [Source:HGNC Symbol;Acc:HGNC:12693]	15892181	15894013	+	96112	downstream
chr9	ALDBSSCT0000011594	ALDBSSCG0000007039	--	Annotated_lncRNA	79701694	79714180	-	ENSSSCT00000028375	ENSSSCG00000025870	HEPACAM2	HEPACAM family member 2 [Source:HGNC Symbol;Acc:HGNC:27364]	79735226	79826241	-	21045	downstream
chr9	ALDBSSCT0000011594	ALDBSSCG0000007039	--	Annotated_lncRNA	79701694	79714180	-	ENSSSCT00000029122	ENSSSCG00000027372	SAMD9	sterile alpha motif domain containing 9 [Source:HGNC Symbol;Acc:HGNC:1348]	79679836	79684587	-	17106	upstream
chr9	ALDBSSCT0000011594	ALDBSSCG0000007039	--	Annotated_lncRNA	79701694	79714180	-	ENSSSCT00000024549	ENSSSCG00000025870	HEPACAM2	HEPACAM family member 2 [Source:HGNC Symbol;Acc:HGNC:27364]	79735226	79828212	-	21045	downstream
chr1	ALDBSSCT0000000055	ALDBSSCG0000000035	--	Annotated_lncRNA	18470168	18473816	+	ENSSSCT00000026957	ENSSSCG00000028948	--	--	18564080	18566068	-	90263	downstream
chr1	ALDBSSCT0000000055	ALDBSSCG0000000035	--	Annotated_lncRNA	18470168	18473816	+	ENSSSCT00000004538	ENSSSCG00000004103	PCMT1	protein-L-isoaspartate(D-aspartate) O-methyltransferase [Source:RefSeq peptide;Acc:NP_001182709]	18440912	18462186	+	7981	downstream
chr1	ALDBSSCT0000000055	ALDBSSCG0000000035	--	Annotated_lncRNA	18470168	18473816	+	ENSSSCT00000004536	ENSSSCG00000004101	LRP11	LDL receptor related protein 11 [Source:HGNC Symbol;Acc:HGNC:16936]	18476457	18536993	-	2640	downstream
chr1	ALDBSSCT0000000055	ALDBSSCG0000000035	--	Annotated_lncRNA	18470168	18473816	+	ENSSSCT00000004535	ENSSSCG00000026042	ULBP1	-	18557383	18563335	+	83566	upstream
chr1	ALDBSSCT0000000055	ALDBSSCG0000000035	--	Annotated_lncRNA	18470168	18473816	+	ENSSSCT00000026174	ENSSSCG00000028948	--	--	18564080	18566074	-	90263	downstream
chr1	ALDBSSCT0000000054	ALDBSSCG0000000034	--	Annotated_lncRNA	17166636	17169140	+	ENSSSCT00000004519	ENSSSCG00000004088	ARMT1	acidic residue methyltransferase 1 [Source:HGNC Symbol;Acc:HGNC:17872]	17190304	17206622	-	21163	downstream
chr1	ALDBSSCT0000000054	ALDBSSCG0000000034	--	Annotated_lncRNA	17166636	17169140	+	ENSSSCT00000004518	ENSSSCG00000004087	CCDC170	coiled-coil domain containing 170 [Source:HGNC Symbol;Acc:HGNC:21177]	17070798	17135270	-	31365	upstream
chr1	ALDBSSCT0000000054	ALDBSSCG0000000034	--	Annotated_lncRNA	17166636	17169140	+	ENSSSCT00000030322	ENSSSCG00000004087	CCDC170	coiled-coil domain containing 170 [Source:HGNC Symbol;Acc:HGNC:21177]	17070798	17164233	-	2402	upstream
chr1	ALDBSSCT0000000054	ALDBSSCG0000000034	--	Annotated_lncRNA	17166636	17169140	+	ENSSSCT00000004520	ENSSSCG00000004089	RMND1	required for meiotic nuclear division 1 homolog [Source:HGNC Symbol;Acc:HGNC:21176]	17207038	17262700	+	37897	upstream
chr15	ALDBSSCT0000004564	ALDBSSCG0000002774	--	Annotated_lncRNA	107625510	107631674	-	ENSSSCT00000017487	ENSSSCG00000016062	NABP1	nucleic acid binding protein 1 [Source:HGNC Symbol;Acc:HGNC:26232]	107658457	107666685	+	26782	upstream
chr3	LNC_000490	XLOC_042239	--	Novel_lncRNA	59668466	59685349	-	ENSSSCT00000027145	ENSSSCG00000020750	--	--	59648030	59648796	+	19669	downstream
chr3	LNC_000490	XLOC_042239	--	Novel_lncRNA	59668466	59685349	-	ENSSSCT00000008986	ENSSSCG00000008205	--	--	59753693	59754231	-	68343	downstream
chr3	LNC_000490	XLOC_042239	--	Novel_lncRNA	59668466	59685349	-	ENSSSCT00000028139	ENSSSCG00000023617	--	--	59675079	59675847	+	-769	antisense
chr3	LNC_000490	XLOC_042239	--	Novel_lncRNA	59668466	59685349	-	ENSSSCT00000030107	ENSSSCG00000029057	--	--	59749609	59750318	-	64259	downstream
chr10	ALDBSSCT0000001555	ALDBSSCG0000000948	--	Annotated_lncRNA	63420021	63422944	-	ENSSSCT00000012152	ENSSSCG00000011105	--	--	63369032	63408729	-	11291	upstream
chr10	ALDBSSCT0000001555	ALDBSSCG0000000948	--	Annotated_lncRNA	63420021	63422944	-	ENSSSCT00000012153	ENSSSCG00000011106	CREM	cAMP responsive element modulator [Source:HGNC Symbol;Acc:HGNC:2352]	63438375	63504728	+	15430	upstream
chr10	ALDBSSCT0000001555	ALDBSSCG0000000948	--	Annotated_lncRNA	63420021	63422944	-	ENSSSCT00000036002	ENSSSCG00000011106	CREM	cAMP responsive element modulator [Source:HGNC Symbol;Acc:HGNC:2352]	63438270	63504498	+	15325	upstream
chr10	ALDBSSCT0000001555	ALDBSSCG0000000948	--	Annotated_lncRNA	63420021	63422944	-	ENSSSCT00000035799	ENSSSCG00000011106	CREM	cAMP responsive element modulator [Source:HGNC Symbol;Acc:HGNC:2352]	63490355	63504498	+	67410	upstream
chr10	ALDBSSCT0000001555	ALDBSSCG0000000948	--	Annotated_lncRNA	63420021	63422944	-	ENSSSCT00000035519	ENSSSCG00000011106	CREM	cAMP responsive element modulator [Source:HGNC Symbol;Acc:HGNC:2352]	63491113	63504498	+	68168	upstream
chr10	ALDBSSCT0000001555	ALDBSSCG0000000948	--	Annotated_lncRNA	63420021	63422944	-	ENSSSCT00000033621	ENSSSCG00000011106	CREM	cAMP responsive element modulator [Source:HGNC Symbol;Acc:HGNC:2352]	63490355	63504498	+	67410	upstream
chr10	ALDBSSCT0000001555	ALDBSSCG0000000948	--	Annotated_lncRNA	63420021	63422944	-	ENSSSCT00000036398	ENSSSCG00000011106	CREM	cAMP responsive element modulator [Source:HGNC Symbol;Acc:HGNC:2352]	63438270	63504498	+	15325	upstream
chr10	ALDBSSCT0000001555	ALDBSSCG0000000948	--	Annotated_lncRNA	63420021	63422944	-	ENSSSCT00000035120	ENSSSCG00000011106	CREM	cAMP responsive element modulator [Source:HGNC Symbol;Acc:HGNC:2352]	63491113	63504498	+	68168	upstream
chr10	ALDBSSCT0000001555	ALDBSSCG0000000948	--	Annotated_lncRNA	63420021	63422944	-	ENSSSCT00000035114	ENSSSCG00000011106	CREM	cAMP responsive element modulator [Source:HGNC Symbol;Acc:HGNC:2352]	63438270	63504498	+	15325	upstream
chr10	ALDBSSCT0000001555	ALDBSSCG0000000948	--	Annotated_lncRNA	63420021	63422944	-	ENSSSCT00000033626	ENSSSCG00000011106	CREM	cAMP responsive element modulator [Source:HGNC Symbol;Acc:HGNC:2352]	63438270	63504498	+	15325	upstream
chr14	ALDBSSCT0000003723	ALDBSSCG0000002226	--	Annotated_lncRNA	113384170	113403926	+	ENSSSCT00000011456	ENSSSCG00000010468	CPEB3	cytoplasmic polyadenylation element binding protein 3 [Source:HGNC Symbol;Acc:HGNC:21746]	113191918	113352216	-	31953	upstream
chr14	ALDBSSCT0000003723	ALDBSSCG0000002226	--	Annotated_lncRNA	113384170	113403926	+	ENSSSCT00000011457	ENSSSCG00000010469	2017-03-05	membrane associated ring-CH-type finger 5 [Source:HGNC Symbol;Acc:HGNC:26025]	113406896	113435560	+	2969	upstream
GL895000.1	LNC_000081	XLOC_003882	--	Novel_lncRNA	17328	18688	+	ENSSSCT00000031841	ENSSSCG00000025004	--	--	8852	16992	-	335	upstream
chr6	ALDBSSCT0000009432	ALDBSSCG0000005754	--	Annotated_lncRNA	78193363	78195251	-	ENSSSCT00000003964	ENSSSCG00000003570	WDTC1	WD and tetratricopeptide repeats 1 [Source:HGNC Symbol;Acc:HGNC:29175]	78055584	78105494	+	87868	downstream
chr6	ALDBSSCT0000009432	ALDBSSCG0000005754	--	Annotated_lncRNA	78193363	78195251	-	ENSSSCT00000003967	ENSSSCG00000003573	MAP3K6	mitogen-activated protein kinase kinase kinase 6 [Source:HGNC Symbol;Acc:HGNC:6858]	78144751	78156593	-	36769	upstream
chr6	ALDBSSCT0000009432	ALDBSSCG0000005754	--	Annotated_lncRNA	78193363	78195251	-	ENSSSCT00000003966	ENSSSCG00000003572	SYTL1	synaptotagmin like 1 [Source:HGNC Symbol;Acc:HGNC:15584]	78135541	78144454	+	48908	downstream
chr6	ALDBSSCT0000009432	ALDBSSCG0000005754	--	Annotated_lncRNA	78193363	78195251	-	ENSSSCT00000029793	ENSSSCG00000003577	WASF2	WAS protein family, member 2 [Source:RefSeq peptide;Acc:NP_001245373]	78196658	78289075	-	1406	downstream
chr6	ALDBSSCT0000009432	ALDBSSCG0000005754	--	Annotated_lncRNA	78193363	78195251	-	ENSSSCT00000003970	ENSSSCG00000003576	GPR3	G protein-coupled receptor 3 [Source:HGNC Symbol;Acc:HGNC:4484]	78181307	78184402	+	8960	downstream
chr6	ALDBSSCT0000009432	ALDBSSCG0000005754	--	Annotated_lncRNA	78193363	78195251	-	ENSSSCT00000003971	ENSSSCG00000003577	WASF2	WAS protein family, member 2 [Source:RefSeq peptide;Acc:NP_001245373]	78196522	78289075	-	1270	downstream
chr6	ALDBSSCT0000009432	ALDBSSCG0000005754	--	Annotated_lncRNA	78193363	78195251	-	ENSSSCT00000003969	ENSSSCG00000003575	CD164L2	CD164 sialomucin-like 2 [Source:HGNC Symbol;Acc:HGNC:32043]	78170499	78173968	-	19394	upstream
chr6	ALDBSSCT0000009432	ALDBSSCG0000005754	--	Annotated_lncRNA	78193363	78195251	-	ENSSSCT00000033917	ENSSSCG00000003573	MAP3K6	mitogen-activated protein kinase kinase kinase 6 [Source:HGNC Symbol;Acc:HGNC:6858]	78148598	78149831	-	43531	upstream
chr6	ALDBSSCT0000009432	ALDBSSCG0000005754	--	Annotated_lncRNA	78193363	78195251	-	ENSSSCT00000031592	ENSSSCG00000023636	TMEM222	transmembrane protein 222 [Source:HGNC Symbol;Acc:HGNC:25363]	78118547	78131520	+	61842	downstream
chr6	ALDBSSCT0000009432	ALDBSSCG0000005754	--	Annotated_lncRNA	78193363	78195251	-	ENSSSCT00000033426	ENSSSCG00000003573	MAP3K6	mitogen-activated protein kinase kinase kinase 6 [Source:HGNC Symbol;Acc:HGNC:6858]	78144530	78156215	-	37147	upstream
chr7	ALDBSSCT0000009923	ALDBSSCG0000006042	--	Annotated_lncRNA	114362057	114364091	+	ENSSSCT00000002687	ENSSSCG00000002418	FLRT2	fibronectin leucine rich transmembrane protein 2 [Source:HGNC Symbol;Acc:HGNC:3761]	114357205	114359187	+	2869	downstream
chr3	ALDBSSCT0000006997	ALDBSSCG0000004251	--	Annotated_lncRNA	4727106	4728670	-	ENSSSCT00000008326	ENSSSCG00000007586	FSCN1	fascin [Source:RefSeq peptide;Acc:NP_001139772]	4776501	4785615	+	47830	upstream
chr3	ALDBSSCT0000006997	ALDBSSCG0000004251	--	Annotated_lncRNA	4727106	4728670	-	ENSSSCT00000008324	ENSSSCG00000007585	--	--	4729276	4732654	-	605	downstream
chr3	ALDBSSCT0000006997	ALDBSSCG0000004251	--	Annotated_lncRNA	4727106	4728670	-	ENSSSCT00000026431	ENSSSCG00000027807	FBXL18	F-box and leucine-rich repeat protein 18 [Source:HGNC Symbol;Acc:HGNC:21874]	4712389	4722083	-	5022	upstream
chr3	ALDBSSCT0000006997	ALDBSSCG0000004251	--	Annotated_lncRNA	4727106	4728670	-	ENSSSCT00000008322	ENSSSCG00000007583	--	--	4635661	4636587	-	90518	upstream
chr3	ALDBSSCT0000006997	ALDBSSCG0000004251	--	Annotated_lncRNA	4727106	4728670	-	ENSSSCT00000029070	ENSSSCG00000021285	--	--	4800910	4962104	-	72239	downstream
chr3	ALDBSSCT0000006993	ALDBSSCG0000004247	--	Annotated_lncRNA	2265918	2267867	-	ENSSSCT00000008308	ENSSSCG00000007572	LFNG	LFNG O-fucosylpeptide 3-beta-N-acetylglucosaminyltransferase [Source:HGNC Symbol;Acc:HGNC:6560]	2208308	2216863	-	49054	upstream
chr3	ALDBSSCT0000006993	ALDBSSCG0000004247	--	Annotated_lncRNA	2265918	2267867	-	ENSSSCT00000008301	ENSSSCG00000007567	CHST12	carbohydrate (chondroitin 4) sulfotransferase 12 [Source:HGNC Symbol;Acc:HGNC:17423]	2285326	2286576	-	17458	downstream
chr3	ALDBSSCT0000006993	ALDBSSCG0000004247	--	Annotated_lncRNA	2265918	2267867	-	ENSSSCT00000008304	ENSSSCG00000007569	GRIFIN	galectin-related inter-fiber protein [Source:HGNC Symbol;Acc:HGNC:4577]	2250303	2251668	+	14249	downstream
chr3	ALDBSSCT0000006993	ALDBSSCG0000004247	--	Annotated_lncRNA	2265918	2267867	-	ENSSSCT00000008297	ENSSSCG00000007565	TTYH3	tweety family member 3 [Source:HGNC Symbol;Acc:HGNC:22222]	2173931	2198099	+	67818	downstream
chr12	ALDBSSCT0000002209	ALDBSSCG0000001322	--	Annotated_lncRNA	19324176	19324766	+	ENSSSCT00000030896	ENSSSCG00000030167	SLC25A39	solute carrier family 25, member 39 [Source:RefSeq peptide;Acc:NP_001231895]	19275070	19278295	-	45880	upstream
chr12	ALDBSSCT0000002209	ALDBSSCG0000001322	--	Annotated_lncRNA	19324176	19324766	+	ENSSSCT00000018910	ENSSSCG00000017371	TMEM101	transmembrane protein 101 [Source:HGNC Symbol;Acc:HGNC:28653]	19402278	19405661	+	77511	upstream
chr12	ALDBSSCT0000002209	ALDBSSCG0000001322	--	Annotated_lncRNA	19324176	19324766	+	ENSSSCT00000025040	ENSSSCG00000024179	NAGS	N-acetylglutamate synthase [Source:HGNC Symbol;Acc:HGNC:17996]	19402214	19411777	-	77447	downstream
chr12	ALDBSSCT0000002209	ALDBSSCG0000001322	--	Annotated_lncRNA	19324176	19324766	+	ENSSSCT00000031726	ENSSSCG00000028150	LSM12	LSM12 homolog [Source:HGNC Symbol;Acc:HGNC:26407]	19386292	19390149	+	61525	upstream
chr12	ALDBSSCT0000002209	ALDBSSCG0000001322	--	Annotated_lncRNA	19324176	19324766	+	ENSSSCT00000018903	ENSSSCG00000017364	C17orf53	chromosome 17 open reading frame 53 [Source:HGNC Symbol;Acc:HGNC:28460]	19339643	19346135	-	14876	downstream
chr12	ALDBSSCT0000002209	ALDBSSCG0000001322	--	Annotated_lncRNA	19324176	19324766	+	ENSSSCT00000018901	ENSSSCG00000017362	ATXN7L3	ataxin 7-like 3 [Source:HGNC Symbol;Acc:HGNC:25416]	19330718	19336435	-	5951	downstream
chr12	ALDBSSCT0000002209	ALDBSSCG0000001322	--	Annotated_lncRNA	19324176	19324766	+	ENSSSCT00000018905	ENSSSCG00000017366	HDAC5	histone deacetylase 5 [Source:HGNC Symbol;Acc:HGNC:14068]	19364145	19375391	-	39378	downstream
chr12	ALDBSSCT0000002209	ALDBSSCG0000001322	--	Annotated_lncRNA	19324176	19324766	+	ENSSSCT00000018904	ENSSSCG00000017365	G6PC3	glucose 6 phosphatase, catalytic, 3 [Source:HGNC Symbol;Acc:HGNC:24861]	19357388	19362070	+	32621	upstream
chr12	ALDBSSCT0000002209	ALDBSSCG0000001322	--	Annotated_lncRNA	19324176	19324766	+	ENSSSCT00000018899	ENSSSCG00000017360	UBTF	upstream binding transcription factor, RNA polymerase I [Source:HGNC Symbol;Acc:HGNC:12511]	19291766	19302571	+	21604	downstream
chr12	ALDBSSCT0000002209	ALDBSSCG0000001322	--	Annotated_lncRNA	19324176	19324766	+	ENSSSCT00000018898	ENSSSCG00000017359	RUNDC3A	RUN domain containing 3A [Source:HGNC Symbol;Acc:HGNC:16984]	19265064	19274059	+	50116	downstream
chr12	ALDBSSCT0000002209	ALDBSSCG0000001322	--	Annotated_lncRNA	19324176	19324766	+	ENSSSCT00000024473	ENSSSCG00000022837	TMUB2	transmembrane and ubiquitin-like domain containing 2 [Source:HGNC Symbol;Acc:HGNC:28459]	19330099	19330644	+	5332	upstream
chr12	ALDBSSCT0000002209	ALDBSSCG0000001322	--	Annotated_lncRNA	19324176	19324766	+	ENSSSCT00000018895	ENSSSCG00000017357	ITGA2B	integrin subunit alpha 2b [Source:HGNC Symbol;Acc:HGNC:6138]	19231261	19247926	-	76249	upstream
chr12	ALDBSSCT0000002209	ALDBSSCG0000001322	--	Annotated_lncRNA	19324176	19324766	+	ENSSSCT00000018894	ENSSSCG00000017356	FAM171A2	family with sequence similarity 171 member A2 [Source:HGNC Symbol;Acc:HGNC:30480]	19216947	19227239	-	96936	upstream
chr12	ALDBSSCT0000002209	ALDBSSCG0000001322	--	Annotated_lncRNA	19324176	19324766	+	ENSSSCT00000032665	ENSSSCG00000017357	ITGA2B	integrin subunit alpha 2b [Source:HGNC Symbol;Acc:HGNC:6138]	19242553	19244344	-	79831	upstream
chr4	ALDBSSCT0000007728	ALDBSSCG0000004693	--	Annotated_lncRNA	135322155	135322614	+	ENSSSCT00000007549	ENSSSCG00000006894	FNBP1L	formin binding protein 1-like [Source:HGNC Symbol;Acc:HGNC:20851]	135331060	135387213	-	8445	downstream
chr4	ALDBSSCT0000007728	ALDBSSCG0000004693	--	Annotated_lncRNA	135322155	135322614	+	ENSSSCT00000029710	ENSSSCG00000024097	--	--	135199623	135225123	+	97031	downstream
chr4	ALDBSSCT0000007728	ALDBSSCG0000004693	--	Annotated_lncRNA	135322155	135322614	+	ENSSSCT00000007548	ENSSSCG00000006893	BCAR3	breast cancer anti-estrogen resistance 3 [Source:HGNC Symbol;Acc:HGNC:973]	135280375	135321500	+	654	downstream
chr4	ALDBSSCT0000007729	ALDBSSCG0000004694	--	Annotated_lncRNA	135582252	135584928	+	ENSSSCT00000007551	ENSSSCG00000006896	TMED5	transmembrane p24 trafficking protein 5 [Source:HGNC Symbol;Acc:HGNC:24251]	135564674	135581598	+	653	downstream
chr4	ALDBSSCT0000007729	ALDBSSCG0000004694	--	Annotated_lncRNA	135582252	135584928	+	ENSSSCT00000025408	ENSSSCG00000028310	DR1	down-regulator of transcription 1 [Source:HGNC Symbol;Acc:HGNC:3017]	135469861	135491375	-	90876	upstream
chr4	ALDBSSCT0000007729	ALDBSSCG0000004694	--	Annotated_lncRNA	135582252	135584928	+	ENSSSCT00000007553	ENSSSCG00000006898	MTF2	metal response element binding transcription factor 2 [Source:HGNC Symbol;Acc:HGNC:29535]	135640163	135752386	-	55234	downstream
chr4	ALDBSSCT0000007729	ALDBSSCG0000004694	--	Annotated_lncRNA	135582252	135584928	+	ENSSSCT00000030921	ENSSSCG00000021670	--	--	135542393	135562221	-	20030	upstream
chr4	ALDBSSCT0000007729	ALDBSSCG0000004694	--	Annotated_lncRNA	135582252	135584928	+	ENSSSCT00000007552	ENSSSCG00000006897	--	--	135595935	135692379	-	11006	downstream
chr5	ALDBSSCT0000008507	ALDBSSCG0000005173	--	Annotated_lncRNA	11962122	11963744	-	ENSSSCT00000000163	ENSSSCG00000000155	TIMP3	TIMP metallopeptidase inhibitor 3 [Source:HGNC Symbol;Acc:HGNC:11822]	11965791	11975326	-	2046	downstream
chr14	ALDBSSCT0000003659	ALDBSSCG0000002190	--	Annotated_lncRNA	84055122	84061378	+	ENSSSCT00000011299	ENSSSCG00000010322	ZNF503	zinc finger protein 503 [Source:HGNC Symbol;Acc:HGNC:23589]	84022362	84025215	-	29906	upstream
chr14	ALDBSSCT0000003653	ALDBSSCG0000002184	--	Annotated_lncRNA	77775467	77776229	+	ENSSSCT00000027078	ENSSSCG00000020712	DNA2	DNA replication helicase/nuclease 2 [Source:HGNC Symbol;Acc:HGNC:2939]	77682509	77699176	+	76290	downstream
chr14	ALDBSSCT0000003653	ALDBSSCG0000002184	--	Annotated_lncRNA	77775467	77776229	+	ENSSSCT00000011209	ENSSSCG00000010241	--	--	77827790	77828785	+	51560	upstream
chr14	ALDBSSCT0000003653	ALDBSSCG0000002184	--	Annotated_lncRNA	77775467	77776229	+	ENSSSCT00000011211	ENSSSCG00000010242	--	--	77703336	77704521	+	70945	downstream
chr14	ALDBSSCT0000003655	ALDBSSCG0000002186	--	Annotated_lncRNA	80158050	80168486	+	ENSSSCT00000011249	ENSSSCG00000010277	SLC29A3	solute carrier family 29 (equilibrative nucleoside transporter), member 3 [Source:HGNC Symbol;Acc:HGNC:23096]	80113947	80157534	+	515	downstream
chr14	ALDBSSCT0000003655	ALDBSSCG0000002186	--	Annotated_lncRNA	80158050	80168486	+	ENSSSCT00000011248	ENSSSCG00000010276	UNC5B	unc-5 netrin receptor B [Source:HGNC Symbol;Acc:HGNC:12568]	80010893	80098908	+	59141	downstream
chr9	ALDBSSCT0000011370	ALDBSSCG0000006908	--	Annotated_lncRNA	143964058	143970784	+	ENSSSCT00000016992	ENSSSCG00000015599	PPP2R5A	protein phosphatase 2 regulatory subunit B', alpha [Source:HGNC Symbol;Acc:HGNC:9309]	144051584	144123652	-	80799	downstream
chr9	ALDBSSCT0000011370	ALDBSSCG0000006908	--	Annotated_lncRNA	143964058	143970784	+	ENSSSCT00000016990	ENSSSCG00000015597	NENF	neudesin neurotrophic factor [Source:HGNC Symbol;Acc:HGNC:30384]	143995861	144006885	-	25076	downstream
chr9	ALDBSSCT0000011370	ALDBSSCG0000006908	--	Annotated_lncRNA	143964058	143970784	+	ENSSSCT00000016991	ENSSSCG00000015598	TMEM206	transmembrane protein 206 [Source:HGNC Symbol;Acc:HGNC:25593]	144015801	144049551	+	45016	upstream
chr9	ALDBSSCT0000011370	ALDBSSCG0000006908	--	Annotated_lncRNA	143964058	143970784	+	ENSSSCT00000024915	ENSSSCG00000015597	NENF	neudesin neurotrophic factor [Source:HGNC Symbol;Acc:HGNC:30384]	143995861	144006885	-	25076	downstream
chr7	ENSSSCT00000001522	ENSSSCG00000001396	SLA-8	Annotated_lncRNA	27626992	27630394	-	ENSSSCT00000022720	ENSSSCG00000023018	MCCD1	mitochondrial coiled-coil domain 1 [Source:HGNC Symbol;Acc:HGNC:20668]	27594275	27595165	-	31826	upstream
chr7	ENSSSCT00000001522	ENSSSCG00000001396	SLA-8	Annotated_lncRNA	27626992	27630394	-	ENSSSCT00000035331	ENSSSCG00000024161	SLA-7	-	27614074	27617328	+	9663	downstream
chr7	ENSSSCT00000001522	ENSSSCG00000001396	SLA-8	Annotated_lncRNA	27626992	27630394	-	ENSSSCT00000001533	ENSSSCG00000001404	TNF	Tumor necrosis factor Tumor necrosis factor, membrane form Intracellular domain 1 Intracellular domain 2 C-domain 1 C-domain 2 Tumor necrosis factor, soluble form [Source:UniProtKB/Swiss-Prot;Acc:P23563]	27549596	27552338	-	74653	upstream
chr7	ENSSSCT00000001522	ENSSSCG00000001396	SLA-8	Annotated_lncRNA	27626992	27630394	-	ENSSSCT00000032883	ENSSSCG00000001405	LTB	lymphotoxin beta [Source:HGNC Symbol;Acc:HGNC:6711]	27545253	27547161	+	79830	downstream
chr7	ENSSSCT00000001522	ENSSSCG00000001396	SLA-8	Annotated_lncRNA	27626992	27630394	-	ENSSSCT00000036579	ENSSSCG00000001428	CYP21A2	cytochrome P450 family 21 subfamily A member 2 [Source:HGNC Symbol;Acc:HGNC:2600]	27722776	27725899	-	92381	downstream
chr7	ENSSSCT00000001522	ENSSSCG00000001396	SLA-8	Annotated_lncRNA	27626992	27630394	-	ENSSSCT00000001327	ENSSSCG00000001398	SLA-6	-	27602782	27606824	+	20167	downstream
chr7	ENSSSCT00000001522	ENSSSCG00000001396	SLA-8	Annotated_lncRNA	27626992	27630394	-	ENSSSCT00000001527	ENSSSCG00000001398	SLA-6	-	27602782	27606070	+	20921	downstream
chr7	ENSSSCT00000001522	ENSSSCG00000001396	SLA-8	Annotated_lncRNA	27626992	27630394	-	ENSSSCT00000001526	ENSSSCG00000001398	SLA-6	-	27602782	27604838	+	22153	downstream
chr7	ENSSSCT00000001522	ENSSSCG00000001396	SLA-8	Annotated_lncRNA	27626992	27630394	-	ENSSSCT00000001525	ENSSSCG00000001398	SLA-6	-	27602782	27606824	+	20167	downstream
chr7	ENSSSCT00000001522	ENSSSCG00000001396	SLA-8	Annotated_lncRNA	27626992	27630394	-	ENSSSCT00000001524	ENSSSCG00000024161	SLA-7	-	27614074	27617558	+	9433	downstream
chr7	ENSSSCT00000001522	ENSSSCG00000001396	SLA-8	Annotated_lncRNA	27626992	27630394	-	ENSSSCT00000034049	ENSSSCG00000001428	CYP21A2	cytochrome P450 family 21 subfamily A member 2 [Source:HGNC Symbol;Acc:HGNC:2600]	27722776	27725846	-	92381	downstream
chr7	ENSSSCT00000001522	ENSSSCG00000001396	SLA-8	Annotated_lncRNA	27626992	27630394	-	ENSSSCT00000001529	ENSSSCG00000001400	DDX39B	DEAD (Asp-Glu-Ala-Asp) box polypeptide 39B [Source:HGNC Symbol;Acc:HGNC:13917]	27582996	27593980	+	33011	downstream
chr7	ENSSSCT00000001522	ENSSSCG00000001396	SLA-8	Annotated_lncRNA	27626992	27630394	-	ENSSSCT00000034199	ENSSSCG00000023611	TNXB	tenascin XB [Source:HGNC Symbol;Acc:HGNC:11976]	27688693	27723070	+	58298	upstream
chr7	ENSSSCT00000001522	ENSSSCG00000001396	SLA-8	Annotated_lncRNA	27626992	27630394	-	ENSSSCT00000035823	ENSSSCG00000024161	SLA-7	-	27614060	27616085	+	10906	downstream
chr7	ENSSSCT00000001522	ENSSSCG00000001396	SLA-8	Annotated_lncRNA	27626992	27630394	-	ENSSSCT00000034475	ENSSSCG00000030882	LST1	-	27538960	27540646	-	86345	upstream
chr7	ENSSSCT00000001522	ENSSSCG00000001396	SLA-8	Annotated_lncRNA	27626992	27630394	-	ENSSSCT00000001535	ENSSSCG00000001405	LTB	lymphotoxin beta [Source:HGNC Symbol;Acc:HGNC:6711]	27545252	27547161	+	79830	downstream
chr7	ENSSSCT00000001522	ENSSSCG00000001396	SLA-8	Annotated_lncRNA	27626992	27630394	-	ENSSSCT00000035081	ENSSSCG00000001405	LTB	lymphotoxin beta [Source:HGNC Symbol;Acc:HGNC:6711]	27545251	27547161	+	79830	downstream
chr7	ENSSSCT00000001522	ENSSSCG00000001396	SLA-8	Annotated_lncRNA	27626992	27630394	-	ENSSSCT00000001531	ENSSSCG00000001402	NFKBIL1	nuclear factor of kappa light polypeptide gene enhancer in B-cells inhibitor-like 1 [Source:HGNC Symbol;Acc:HGNC:7800]	27566956	27578071	-	48920	upstream
chr7	ENSSSCT00000001522	ENSSSCG00000001396	SLA-8	Annotated_lncRNA	27626992	27630394	-	ENSSSCT00000001532	ENSSSCG00000001403	LTA	Lymphotoxin-alpha [Source:UniProtKB/Swiss-Prot;Acc:P26445]	27553711	27555858	-	71133	upstream
chr7	ENSSSCT00000001522	ENSSSCG00000001396	SLA-8	Annotated_lncRNA	27626992	27630394	-	ENSSSCT00000034506	ENSSSCG00000001403	LTA	Lymphotoxin-alpha [Source:UniProtKB/Swiss-Prot;Acc:P26445]	27553711	27555626	-	71365	upstream
chr7	ENSSSCT00000001522	ENSSSCG00000001396	SLA-8	Annotated_lncRNA	27626992	27630394	-	ENSSSCT00000001336	ENSSSCG00000024161	SLA-7	-	27614074	27617558	+	9433	downstream
chr7	ENSSSCT00000001522	ENSSSCG00000001396	SLA-8	Annotated_lncRNA	27626992	27630394	-	ENSSSCT00000035387	ENSSSCG00000001401	ATP6V1G2	V-type proton ATPase subunit G 2 [Source:UniProtKB/Swiss-Prot;Acc:Q9TSV6]	27578855	27581075	+	45916	downstream
chr7	ENSSSCT00000001522	ENSSSCG00000001396	SLA-8	Annotated_lncRNA	27626992	27630394	-	ENSSSCT00000001570	ENSSSCG00000001427	C4A	-	27729058	27744181	-	98663	downstream
chr7	ENSSSCT00000001522	ENSSSCG00000001396	SLA-8	Annotated_lncRNA	27626992	27630394	-	ENSSSCT00000001571	ENSSSCG00000001428	CYP21A2	cytochrome P450 family 21 subfamily A member 2 [Source:HGNC Symbol;Acc:HGNC:2600]	27722776	27725977	-	92381	downstream
chr7	ENSSSCT00000001522	ENSSSCG00000001396	SLA-8	Annotated_lncRNA	27626992	27630394	-	ENSSSCT00000032673	ENSSSCG00000001400	DDX39B	DEAD (Asp-Glu-Ala-Asp) box polypeptide 39B [Source:HGNC Symbol;Acc:HGNC:13917]	27583059	27585882	+	41109	downstream
chr7	ENSSSCT00000001522	ENSSSCG00000001396	SLA-8	Annotated_lncRNA	27626992	27630394	-	ENSSSCT00000001573	ENSSSCG00000023611	TNXB	tenascin XB [Source:HGNC Symbol;Acc:HGNC:11976]	27681441	27723570	+	51046	upstream
chr7	ENSSSCT00000001522	ENSSSCG00000001396	SLA-8	Annotated_lncRNA	27626992	27630394	-	ENSSSCT00000001338	ENSSSCG00000001398	SLA-6	-	27602782	27604169	+	22822	downstream
chr9	ALDBSSCT0000011378	ALDBSSCG0000006915	--	Annotated_lncRNA	148392055	148395168	+	ENSSSCT00000029838	ENSSSCG00000026412	--	--	148127165	148333069	+	58985	downstream
chr9	ALDBSSCT0000011378	ALDBSSCG0000006915	--	Annotated_lncRNA	148392055	148395168	+	ENSSSCT00000036617	ENSSSCG00000015622	CD34	CD34 molecule [Source:HGNC Symbol;Acc:HGNC:1662]	148446001	148470636	+	50832	upstream
chr9	ALDBSSCT0000011378	ALDBSSCG0000006915	--	Annotated_lncRNA	148392055	148395168	+	ENSSSCT00000017016	ENSSSCG00000015622	CD34	CD34 molecule [Source:HGNC Symbol;Acc:HGNC:1662]	148445971	148470659	+	50802	upstream
chr7	ALDBSSCT0000009654	ALDBSSCG0000005891	--	Annotated_lncRNA	13825878	13848657	+	ENSSSCT00000001162	ENSSSCG00000001067	STMND1	stathmin domain containing 1 [Source:HGNC Symbol;Acc:HGNC:44668]	13859925	13885150	+	11267	upstream
chr7	ALDBSSCT0000009654	ALDBSSCG0000005891	--	Annotated_lncRNA	13825878	13848657	+	ENSSSCT00000001161	ENSSSCG00000001066	RBM24	RNA binding motif protein 24 [Source:HGNC Symbol;Acc:HGNC:21539]	13741116	13753960	+	71917	downstream
chr15	ALDBSSCT0000004291	ALDBSSCG0000002600	--	Annotated_lncRNA	117963936	117965758	+	ENSSSCT00000026694	ENSSSCG00000030081	--	--	117982953	118007077	+	17194	upstream
chr15	ALDBSSCT0000004291	ALDBSSCG0000002600	--	Annotated_lncRNA	117963936	117965758	+	ENSSSCT00000017548	ENSSSCG00000016117	CARF	calcium responsive transcription factor [Source:HGNC Symbol;Acc:HGNC:14435]	117869022	117914168	+	49767	downstream
chr15	ALDBSSCT0000004291	ALDBSSCG0000002600	--	Annotated_lncRNA	117963936	117965758	+	ENSSSCT00000017549	ENSSSCG00000016118	NBEAL1	neurobeachin like 1 [Source:HGNC Symbol;Acc:HGNC:20681]	118048753	118087143	-	82994	downstream
chr6	ALDBSSCT0000008703	ALDBSSCG0000005310	--	Annotated_lncRNA	1761731	1765861	+	ENSSSCT00000002944	ENSSSCG00000002653	JPH3	junctophilin 3 [Source:HGNC Symbol;Acc:HGNC:14203]	1766996	1855700	-	1134	downstream
chr6	ALDBSSCT0000008703	ALDBSSCG0000005310	--	Annotated_lncRNA	1761731	1765861	+	ENSSSCT00000002943	ENSSSCG00000002652	KLHDC4	kelch domain containing 4 [Source:HGNC Symbol;Acc:HGNC:25272]	1750798	1760656	+	1074	downstream
chr13	ALDBSSCT0000003339	ALDBSSCG0000002009	--	Annotated_lncRNA	157173775	157175427	-	ENSSSCT00000024809	ENSSSCG00000027820	CD200	CD200 molecule [Source:HGNC Symbol;Acc:HGNC:7203]	157180878	157193543	-	5450	downstream
chr5	ALDBSSCT0000008252	ALDBSSCG0000005007	--	Annotated_lncRNA	6039841	6041673	+	ENSSSCT00000000089	ENSSSCG00000000083	RPS19BP1	ribosomal protein S19 binding protein 1 [Source:HGNC Symbol;Acc:HGNC:28749]	6034982	6038546	+	1294	downstream
chr5	ALDBSSCT0000008252	ALDBSSCG0000005007	--	Annotated_lncRNA	6039841	6041673	+	ENSSSCT00000000088	ENSSSCG00000000082	CACNA1I	calcium channel, voltage-dependent, T type, alpha 1I subunit [Source:HGNC Symbol;Acc:HGNC:1396]	5899444	5963947	-	75893	upstream
chr5	ALDBSSCT0000008252	ALDBSSCG0000005007	--	Annotated_lncRNA	6039841	6041673	+	ENSSSCT00000000090	ENSSSCG00000000084	ATF4	-	6042582	6044659	-	908	downstream
chr5	ALDBSSCT0000008252	ALDBSSCG0000005007	--	Annotated_lncRNA	6039841	6041673	+	ENSSSCT00000000092	ENSSSCG00000000086	MGAT3	mannosyl (beta-1,4-)-glycoprotein beta-1,4-N-acetylglucosaminyltransferase [Source:HGNC Symbol;Acc:HGNC:7046]	6080536	6081381	-	38862	downstream
chr5	ALDBSSCT0000008252	ALDBSSCG0000005007	--	Annotated_lncRNA	6039841	6041673	+	ENSSSCT00000000093	ENSSSCG00000000087	TAB1	TGF-beta activated kinase 1/MAP3K7 binding protein 1 [Source:HGNC Symbol;Acc:HGNC:18157]	6123122	6135354	-	81448	downstream
chr5	ALDBSSCT0000008252	ALDBSSCG0000005007	--	Annotated_lncRNA	6039841	6041673	+	ENSSSCT00000023335	ENSSSCG00000021699	--	--	6059519	6059731	-	17845	downstream
chr5	ALDBSSCT0000008252	ALDBSSCG0000005007	--	Annotated_lncRNA	6039841	6041673	+	ENSSSCT00000031655	ENSSSCG00000024216	MIEF1	mitochondrial elongation factor 1 [Source:HGNC Symbol;Acc:HGNC:25979]	6047798	6054120	-	6124	downstream
chr5	ALDBSSCT0000008252	ALDBSSCG0000005007	--	Annotated_lncRNA	6039841	6041673	+	ENSSSCT00000035948	ENSSSCG00000000087	TAB1	TGF-beta activated kinase 1/MAP3K7 binding protein 1 [Source:HGNC Symbol;Acc:HGNC:18157]	6122718	6146864	-	81044	downstream
chr3	ALDBSSCT0000006667	ALDBSSCG0000004076	--	Annotated_lncRNA	41484115	41494049	+	ENSSSCT00000008768	ENSSSCG00000008000	RPUSD1	RNA pseudouridylate synthase domain containing 1 [Source:HGNC Symbol;Acc:HGNC:14173]	41465703	41468134	-	15980	upstream
chr3	ALDBSSCT0000006667	ALDBSSCG0000004076	--	Annotated_lncRNA	41484115	41494049	+	ENSSSCT00000008769	ENSSSCG00000008001	MSLN	mesothelin [Source:HGNC Symbol;Acc:HGNC:7371]	41448662	41452015	+	32099	downstream
chr3	ALDBSSCT0000006667	ALDBSSCG0000004076	--	Annotated_lncRNA	41484115	41494049	+	ENSSSCT00000033264	ENSSSCG00000008003	HAGHL	hydroxyacylglutathione hydrolase-like [Source:HGNC Symbol;Acc:HGNC:14177]	41424446	41426511	+	57603	downstream
chr3	ALDBSSCT0000006667	ALDBSSCG0000004076	--	Annotated_lncRNA	41484115	41494049	+	ENSSSCT00000023757	ENSSSCG00000023487	MSLNL	mesothelin-like [Source:HGNC Symbol;Acc:HGNC:14170]	41452706	41460404	-	23710	upstream
chr3	ALDBSSCT0000006667	ALDBSSCG0000004076	--	Annotated_lncRNA	41484115	41494049	+	ENSSSCT00000028633	ENSSSCG00000008007	WDR24	WD repeat domain 24 [Source:HGNC Symbol;Acc:HGNC:20852]	41387130	41392382	-	91732	upstream
chr3	ALDBSSCT0000006667	ALDBSSCG0000004076	--	Annotated_lncRNA	41484115	41494049	+	ENSSSCT00000033244	ENSSSCG00000008003	HAGHL	hydroxyacylglutathione hydrolase-like [Source:HGNC Symbol;Acc:HGNC:14177]	41426720	41427693	+	56421	downstream
chr3	ALDBSSCT0000006667	ALDBSSCG0000004076	--	Annotated_lncRNA	41484115	41494049	+	ENSSSCT00000033768	ENSSSCG00000008003	HAGHL	hydroxyacylglutathione hydrolase-like [Source:HGNC Symbol;Acc:HGNC:14177]	41426451	41427674	+	56440	downstream
chr3	ALDBSSCT0000006667	ALDBSSCG0000004076	--	Annotated_lncRNA	41484115	41494049	+	ENSSSCT00000008779	ENSSSCG00000008011	GNG13	guanine nucleotide binding protein (G protein), gamma 13 [Source:HGNC Symbol;Acc:HGNC:14131]	41476392	41476740	-	7374	upstream
chr3	ALDBSSCT0000006667	ALDBSSCG0000004076	--	Annotated_lncRNA	41484115	41494049	+	ENSSSCT00000008778	ENSSSCG00000008010	CHTF18	chromosome transmission fidelity factor 18 [Source:HGNC Symbol;Acc:HGNC:18435]	41468380	41476142	+	7972	downstream
chr3	ALDBSSCT0000006667	ALDBSSCG0000004076	--	Annotated_lncRNA	41484115	41494049	+	ENSSSCT00000008775	ENSSSCG00000008007	WDR24	WD repeat domain 24 [Source:HGNC Symbol;Acc:HGNC:20852]	41387130	41391684	-	92430	upstream
chr3	ALDBSSCT0000006667	ALDBSSCG0000004076	--	Annotated_lncRNA	41484115	41494049	+	ENSSSCT00000008774	ENSSSCG00000008006	FBXL16	F-box and leucine-rich repeat protein 16 [Source:HGNC Symbol;Acc:HGNC:14150]	41393910	41406058	-	78056	upstream
chr3	ALDBSSCT0000006667	ALDBSSCG0000004076	--	Annotated_lncRNA	41484115	41494049	+	ENSSSCT00000008777	ENSSSCG00000008009	LMF1	lipase maturation factor 1 [Source:HGNC Symbol;Acc:HGNC:14154]	41548506	41564662	-	54456	downstream
chr3	ALDBSSCT0000006667	ALDBSSCG0000004076	--	Annotated_lncRNA	41484115	41494049	+	ENSSSCT00000008776	ENSSSCG00000008008	STUB1	STIP1 homology and U-box containing protein 1, E3 ubiquitin protein ligase [Source:HGNC Symbol;Acc:HGNC:11427]	41382554	41384840	+	99274	downstream
chr3	ALDBSSCT0000006667	ALDBSSCG0000004076	--	Annotated_lncRNA	41484115	41494049	+	ENSSSCT00000008771	ENSSSCG00000008003	HAGHL	hydroxyacylglutathione hydrolase-like [Source:HGNC Symbol;Acc:HGNC:14177]	41424826	41428259	+	55855	downstream
chr3	ALDBSSCT0000006667	ALDBSSCG0000004076	--	Annotated_lncRNA	41484115	41494049	+	ENSSSCT00000008770	ENSSSCG00000008002	NARFL	nuclear prelamin A recognition factor-like [Source:HGNC Symbol;Acc:HGNC:14179]	41428516	41435243	-	48871	upstream
chr3	ALDBSSCT0000006667	ALDBSSCG0000004076	--	Annotated_lncRNA	41484115	41494049	+	ENSSSCT00000008773	ENSSSCG00000008005	METRN	meteorin, glial cell differentiation regulator [Source:HGNC Symbol;Acc:HGNC:14151]	41413631	41415687	+	68427	downstream
chr3	ALDBSSCT0000006667	ALDBSSCG0000004076	--	Annotated_lncRNA	41484115	41494049	+	ENSSSCT00000008772	ENSSSCG00000008004	FAM173A	family with sequence similarity 173 member A [Source:HGNC Symbol;Acc:HGNC:14152]	41418621	41422752	+	61362	downstream
chr3	ALDBSSCT0000006667	ALDBSSCG0000004076	--	Annotated_lncRNA	41484115	41494049	+	ENSSSCT00000008753	ENSSSCG00000007988	JMJD8	jumonji domain containing 8 [Source:HGNC Symbol;Acc:HGNC:14148]	41385148	41386877	-	97237	upstream
chr3	ALDBSSCT0000006667	ALDBSSCG0000004076	--	Annotated_lncRNA	41484115	41494049	+	ENSSSCT00000036112	ENSSSCG00000008003	HAGHL	hydroxyacylglutathione hydrolase-like [Source:HGNC Symbol;Acc:HGNC:14177]	41424826	41427874	+	56240	downstream
chr3	ALDBSSCT0000006667	ALDBSSCG0000004076	--	Annotated_lncRNA	41484115	41494049	+	ENSSSCT00000035492	ENSSSCG00000008003	HAGHL	hydroxyacylglutathione hydrolase-like [Source:HGNC Symbol;Acc:HGNC:14177]	41424154	41427627	+	56487	downstream
chr3	ALDBSSCT0000006667	ALDBSSCG0000004076	--	Annotated_lncRNA	41484115	41494049	+	ENSSSCT00000032942	ENSSSCG00000008003	HAGHL	hydroxyacylglutathione hydrolase-like [Source:HGNC Symbol;Acc:HGNC:14177]	41424392	41426468	+	57646	downstream
chr3	ALDBSSCT0000006667	ALDBSSCG0000004076	--	Annotated_lncRNA	41484115	41494049	+	ENSSSCT00000031631	ENSSSCG00000008010	CHTF18	chromosome transmission fidelity factor 18 [Source:HGNC Symbol;Acc:HGNC:18435]	41468267	41476142	+	7972	downstream
chr12	ALDBSSCT0000002203	ALDBSSCG0000001319	--	Annotated_lncRNA	19118854	19122759	+	ENSSSCT00000030607	ENSSSCG00000028787	--	--	19166974	19167516	+	44214	upstream
chr12	ALDBSSCT0000002203	ALDBSSCG0000001319	--	Annotated_lncRNA	19118854	19122759	+	ENSSSCT00000035092	ENSSSCG00000017358	SLC4A1	solute carrier family 4 (anion exchanger), member 1 (Diego blood group) [Source:HGNC Symbol;Acc:HGNC:11027]	19179152	19196571	-	56392	downstream
chr12	ALDBSSCT0000002203	ALDBSSCG0000001319	--	Annotated_lncRNA	19118854	19122759	+	ENSSSCT00000018893	ENSSSCG00000017355	GRN	granulin [Source:HGNC Symbol;Acc:HGNC:4601]	19212206	19216305	+	89446	upstream
chr12	ALDBSSCT0000002203	ALDBSSCG0000001319	--	Annotated_lncRNA	19118854	19122759	+	ENSSSCT00000018892	ENSSSCG00000017354	GPATCH8	G-patch domain containing 8 [Source:HGNC Symbol;Acc:HGNC:29066]	19169466	19170989	+	46706	upstream
chr12	ALDBSSCT0000002203	ALDBSSCG0000001319	--	Annotated_lncRNA	19118854	19122759	+	ENSSSCT00000026388	ENSSSCG00000027042	--	--	19125548	19139401	-	2788	downstream
chr12	ALDBSSCT0000002203	ALDBSSCG0000001319	--	Annotated_lncRNA	19118854	19122759	+	ENSSSCT00000018894	ENSSSCG00000017356	FAM171A2	family with sequence similarity 171 member A2 [Source:HGNC Symbol;Acc:HGNC:30480]	19216947	19227239	-	94187	downstream
chr12	ALDBSSCT0000002203	ALDBSSCG0000001319	--	Annotated_lncRNA	19118854	19122759	+	ENSSSCT00000018897	ENSSSCG00000017358	SLC4A1	solute carrier family 4 (anion exchanger), member 1 (Diego blood group) [Source:HGNC Symbol;Acc:HGNC:11027]	19179491	19193196	-	56731	downstream
chr3	ALDBSSCT0000006662	ALDBSSCG0000004073	--	Annotated_lncRNA	40681037	40683071	+	ENSSSCT00000030725	ENSSSCG00000028381	--	--	40659339	40673509	-	7527	upstream
chr3	ALDBSSCT0000006662	ALDBSSCG0000004073	--	Annotated_lncRNA	40681037	40683071	+	ENSSSCT00000028658	ENSSSCG00000022630	FLYWCH2	FLYWCH family member 2 [Source:HGNC Symbol;Acc:HGNC:25178]	40683844	40693545	+	772	upstream
chr3	ALDBSSCT0000006662	ALDBSSCG0000004073	--	Annotated_lncRNA	40681037	40683071	+	ENSSSCT00000025347	ENSSSCG00000029641	ZSCAN10	zinc finger and SCAN domain containing 10 [Source:HGNC Symbol;Acc:HGNC:12997]	40581662	40587506	-	93530	upstream
chr3	ALDBSSCT0000006662	ALDBSSCG0000004073	--	Annotated_lncRNA	40681037	40683071	+	ENSSSCT00000025712	ENSSSCG00000029641	ZSCAN10	zinc finger and SCAN domain containing 10 [Source:HGNC Symbol;Acc:HGNC:12997]	40581662	40587399	-	93637	upstream
chr3	ALDBSSCT0000006662	ALDBSSCG0000004073	--	Annotated_lncRNA	40681037	40683071	+	ENSSSCT00000023885	ENSSSCG00000022744	PRSS21	protease, serine 21 [Source:HGNC Symbol;Acc:HGNC:9485]	40699431	40704008	-	16359	downstream
chr3	ALDBSSCT0000006662	ALDBSSCG0000004073	--	Annotated_lncRNA	40681037	40683071	+	ENSSSCT00000026941	ENSSSCG00000023304	SRRM2	serine/arginine repetitive matrix 2 [Source:HGNC Symbol;Acc:HGNC:16639]	40613487	40631943	+	49093	downstream
chr3	ALDBSSCT0000006662	ALDBSSCG0000004073	--	Annotated_lncRNA	40681037	40683071	+	ENSSSCT00000026769	ENSSSCG00000030518	PRSS33	protease, serine 33 [Source:HGNC Symbol;Acc:HGNC:30405]	40640468	40642441	-	38595	upstream
chr3	ALDBSSCT0000006662	ALDBSSCG0000004073	--	Annotated_lncRNA	40681037	40683071	+	ENSSSCT00000008836	ENSSSCG00000008063	--	--	40647313	40653220	-	27816	upstream
chr3	ALDBSSCT0000006662	ALDBSSCG0000004073	--	Annotated_lncRNA	40681037	40683071	+	ENSSSCT00000008834	ENSSSCG00000008061	TCEB2	transcription elongation factor B (SIII), polypeptide 2 (18kDa, elongin B) [Source:HGNC Symbol;Acc:HGNC:11619]	40632308	40636157	-	44879	upstream
chr2	ALDBSSCT0000005984	ALDBSSCG0000003655	--	Annotated_lncRNA	112804220	112818666	+	ENSSSCT00000031964	ENSSSCG00000024999	PPIP5K2	diphosphoinositol pentakisphosphate kinase 2 [Source:HGNC Symbol;Acc:HGNC:29035]	112660166	112712718	-	91501	upstream
chr2	ALDBSSCT0000005984	ALDBSSCG0000003655	--	Annotated_lncRNA	112804220	112818666	+	ENSSSCT00000025743	ENSSSCG00000024089	C5orf30	chromosome 5 open reading frame 30 [Source:HGNC Symbol;Acc:HGNC:25052]	112821401	112822024	+	2734	upstream
chr3	ALDBSSCT0000006661	ALDBSSCG0000004073	--	Annotated_lncRNA	40681007	40683071	+	ENSSSCT00000030725	ENSSSCG00000028381	--	--	40659339	40673509	-	7497	upstream
chr3	ALDBSSCT0000006661	ALDBSSCG0000004073	--	Annotated_lncRNA	40681007	40683071	+	ENSSSCT00000028658	ENSSSCG00000022630	FLYWCH2	FLYWCH family member 2 [Source:HGNC Symbol;Acc:HGNC:25178]	40683844	40693545	+	772	upstream
chr3	ALDBSSCT0000006661	ALDBSSCG0000004073	--	Annotated_lncRNA	40681007	40683071	+	ENSSSCT00000025347	ENSSSCG00000029641	ZSCAN10	zinc finger and SCAN domain containing 10 [Source:HGNC Symbol;Acc:HGNC:12997]	40581662	40587506	-	93500	upstream
chr3	ALDBSSCT0000006661	ALDBSSCG0000004073	--	Annotated_lncRNA	40681007	40683071	+	ENSSSCT00000025712	ENSSSCG00000029641	ZSCAN10	zinc finger and SCAN domain containing 10 [Source:HGNC Symbol;Acc:HGNC:12997]	40581662	40587399	-	93607	upstream
chr3	ALDBSSCT0000006661	ALDBSSCG0000004073	--	Annotated_lncRNA	40681007	40683071	+	ENSSSCT00000023885	ENSSSCG00000022744	PRSS21	protease, serine 21 [Source:HGNC Symbol;Acc:HGNC:9485]	40699431	40704008	-	16359	downstream
chr3	ALDBSSCT0000006661	ALDBSSCG0000004073	--	Annotated_lncRNA	40681007	40683071	+	ENSSSCT00000026941	ENSSSCG00000023304	SRRM2	serine/arginine repetitive matrix 2 [Source:HGNC Symbol;Acc:HGNC:16639]	40613487	40631943	+	49063	downstream
chr3	ALDBSSCT0000006661	ALDBSSCG0000004073	--	Annotated_lncRNA	40681007	40683071	+	ENSSSCT00000026769	ENSSSCG00000030518	PRSS33	protease, serine 33 [Source:HGNC Symbol;Acc:HGNC:30405]	40640468	40642441	-	38565	upstream
chr3	ALDBSSCT0000006661	ALDBSSCG0000004073	--	Annotated_lncRNA	40681007	40683071	+	ENSSSCT00000008836	ENSSSCG00000008063	--	--	40647313	40653220	-	27786	upstream
chr3	ALDBSSCT0000006661	ALDBSSCG0000004073	--	Annotated_lncRNA	40681007	40683071	+	ENSSSCT00000008834	ENSSSCG00000008061	TCEB2	transcription elongation factor B (SIII), polypeptide 2 (18kDa, elongin B) [Source:HGNC Symbol;Acc:HGNC:11619]	40632308	40636157	-	44849	upstream
chr3	LNC_000499	XLOC_043210	--	Novel_lncRNA	142377006	142383224	-	ENSSSCT00000009474	ENSSSCG00000008659	ACP1	acid phosphatase 1, soluble [Source:HGNC Symbol;Acc:HGNC:122]	142383410	142396888	+	185	upstream
chr14	ALDBSSCT0000003729	ALDBSSCG0000002231	--	Annotated_lncRNA	117227502	117243637	+	ENSSSCT00000011492	ENSSSCG00000010503	ZNF518A	zinc finger protein 518A [Source:HGNC Symbol;Acc:HGNC:29009]	117246696	117251171	+	3058	upstream
chr14	ALDBSSCT0000003729	ALDBSSCG0000002231	--	Annotated_lncRNA	117227502	117243637	+	ENSSSCT00000011489	ENSSSCG00000010501	--	--	117112920	117138376	+	89125	downstream
chr14	ALDBSSCT0000003729	ALDBSSCG0000002231	--	Annotated_lncRNA	117227502	117243637	+	ENSSSCT00000011493	ENSSSCG00000010504	BLNK	B-cell linker [Source:HGNC Symbol;Acc:HGNC:14211]	117265094	117349965	-	21456	downstream
chr14	ALDBSSCT0000003729	ALDBSSCG0000002231	--	Annotated_lncRNA	117227502	117243637	+	ENSSSCT00000011490	ENSSSCG00000010501	--	--	117112920	117138376	+	89125	downstream
chr14	ALDBSSCT0000003729	ALDBSSCG0000002231	--	Annotated_lncRNA	117227502	117243637	+	ENSSSCT00000011491	ENSSSCG00000010502	CCNJ	cyclin J [Source:HGNC Symbol;Acc:HGNC:23434]	117154842	117176840	+	50661	downstream
chr3	LNC_000495	XLOC_042990	--	Novel_lncRNA	118019468	118023239	-	ENSSSCT00000023126	ENSSSCG00000026465	--	--	118042355	118103509	-	19115	downstream
chr3	LNC_000494	XLOC_042722	--	Novel_lncRNA	97670171	97685404	-	ENSSSCT00000024756	ENSSSCG00000029084	FSHR	follicle-stimulating hormone receptor precursor [Source:RefSeq peptide;Acc:NP_999551]	97500987	97591897	+	78273	downstream
chr3	LNC_000497	XLOC_043103	--	Novel_lncRNA	127048691	127542506	-	ENSSSCT00000009419	ENSSSCG00000008608	RDH14	retinol dehydrogenase 14 (all-trans/9-cis/11-cis) [Source:HGNC Symbol;Acc:HGNC:19979]	127542572	127547856	+	65	upstream
chr3	LNC_000497	XLOC_043103	--	Novel_lncRNA	127048691	127542506	-	ENSSSCT00000009418	ENSSSCG00000008607	--	--	127518234	127540107	+	-21874	antisense
chr3	LNC_000496	XLOC_043025	--	Novel_lncRNA	119002372	119004951	-	ENSSSCT00000009361	ENSSSCG00000008556	KHK	ketohexokinase [Source:HGNC Symbol;Acc:HGNC:6315]	119019722	119030158	-	14770	downstream
chr3	LNC_000496	XLOC_043025	--	Novel_lncRNA	119002372	119004951	-	ENSSSCT00000009355	ENSSSCG00000008550	SLC5A6	solute carrier family 5 (sodium/multivitamin and iodide cotransporter), member 6 [Source:HGNC Symbol;Acc:HGNC:11041]	118921990	118929221	+	73150	downstream
chr3	LNC_000496	XLOC_043025	--	Novel_lncRNA	119002372	119004951	-	ENSSSCT00000009363	ENSSSCG00000008558	AGBL5	ATP/GTP binding protein-like 5 [Source:HGNC Symbol;Acc:HGNC:26147]	119046248	119064498	-	41296	downstream
chr3	LNC_000496	XLOC_043025	--	Novel_lncRNA	119002372	119004951	-	ENSSSCT00000023065	ENSSSCG00000022058	ATRAID	all-trans retinoic acid induced differentiation factor [Source:HGNC Symbol;Acc:HGNC:24090]	118912947	118918798	-	83573	upstream
chr3	LNC_000496	XLOC_043025	--	Novel_lncRNA	119002372	119004951	-	ENSSSCT00000009364	ENSSSCG00000008559	TMEM214	transmembrane protein 214 [Source:HGNC Symbol;Acc:HGNC:25983]	119068661	119079526	-	63709	downstream
chr3	LNC_000496	XLOC_043025	--	Novel_lncRNA	119002372	119004951	-	ENSSSCT00000009360	ENSSSCG00000008555	CGREF1	cell growth regulator with EF-hand domain 1 [Source:HGNC Symbol;Acc:HGNC:16962]	119005134	119018767	+	182	upstream
chr3	LNC_000496	XLOC_043025	--	Novel_lncRNA	119002372	119004951	-	ENSSSCT00000023134	ENSSSCG00000008558	AGBL5	ATP/GTP binding protein-like 5 [Source:HGNC Symbol;Acc:HGNC:26147]	119045334	119064498	-	40382	downstream
chr3	LNC_000496	XLOC_043025	--	Novel_lncRNA	119002372	119004951	-	ENSSSCT00000030065	ENSSSCG00000008555	CGREF1	cell growth regulator with EF-hand domain 1 [Source:HGNC Symbol;Acc:HGNC:16962]	119015612	119018767	+	10660	upstream
chr3	LNC_000496	XLOC_043025	--	Novel_lncRNA	119002372	119004951	-	ENSSSCT00000009358	ENSSSCG00000008553	PREB	prolactin regulatory element binding [Source:HGNC Symbol;Acc:HGNC:9356]	118990873	118994677	+	7694	downstream
chr3	LNC_000496	XLOC_043025	--	Novel_lncRNA	119002372	119004951	-	ENSSSCT00000009359	ENSSSCG00000008554	ABHD1	abhydrolase domain containing 1 [Source:HGNC Symbol;Acc:HGNC:17553]	118992527	119000532	-	1839	upstream
chr3	LNC_000496	XLOC_043025	--	Novel_lncRNA	119002372	119004951	-	ENSSSCT00000009357	ENSSSCG00000008552	PRR30	proline rich 30 [Source:HGNC Symbol;Acc:HGNC:28677]	118987857	118989050	+	13321	downstream
chr3	LNC_000496	XLOC_043025	--	Novel_lncRNA	119002372	119004951	-	ENSSSCT00000009362	ENSSSCG00000008557	EMILIN1	elastin microfibril interfacer 1 [Source:HGNC Symbol;Acc:HGNC:19880]	119030264	119038488	-	25312	downstream
chr3	LNC_000496	XLOC_043025	--	Novel_lncRNA	119002372	119004951	-	ENSSSCT00000027657	ENSSSCG00000029185	MAPRE3	microtubule associated protein RP/EB family member 3 [Source:HGNC Symbol;Acc:HGNC:6892]	119084107	119135331	-	79155	downstream
chr3	LNC_000496	XLOC_043025	--	Novel_lncRNA	119002372	119004951	-	ENSSSCT00000028246	ENSSSCG00000008556	KHK	ketohexokinase [Source:HGNC Symbol;Acc:HGNC:6315]	119019722	119030158	-	14770	downstream
chr3	LNC_000496	XLOC_043025	--	Novel_lncRNA	119002372	119004951	-	ENSSSCT00000029034	ENSSSCG00000027409	TCF23	transcription factor 23 [Source:HGNC Symbol;Acc:HGNC:18602]	118975365	118982315	-	20056	upstream
chr3	LNC_000491	XLOC_042437	--	Novel_lncRNA	71012819	71027589	-	ENSSSCT00000031635	ENSSSCG00000021546	GCFC2	GC-rich sequence DNA-binding factor 2 [Source:HGNC Symbol;Acc:HGNC:1317]	71111823	71133223	-	84233	downstream
chr3	LNC_000491	XLOC_042437	--	Novel_lncRNA	71012819	71027589	-	ENSSSCT00000023158	ENSSSCG00000021007	MRPL19	mitochondrial ribosomal protein L19 [Source:HGNC Symbol;Acc:HGNC:14052]	71096620	71107445	+	69030	upstream
chr3	LNC_000491	XLOC_042437	--	Novel_lncRNA	71012819	71027589	-	ENSSSCT00000023923	ENSSSCG00000021287	--	--	70994304	71011545	+	1273	downstream
chr3	ALDBSSCT0000006528	ALDBSSCG0000003991	--	Annotated_lncRNA	4187348	4200527	+	ENSSSCT00000008316	ENSSSCG00000007577	AP5Z1	adaptor related protein complex 5, zeta 1 subunit [Source:HGNC Symbol;Acc:HGNC:22197]	4281221	4293277	+	80693	upstream
chr3	ALDBSSCT0000006528	ALDBSSCG0000003991	--	Annotated_lncRNA	4187348	4200527	+	ENSSSCT00000008315	ENSSSCG00000007576	FOXK1	forkhead box K1 [Source:HGNC Symbol;Acc:HGNC:23480]	4204875	4263940	+	4347	upstream
chr3	ALDBSSCT0000006528	ALDBSSCG0000003991	--	Annotated_lncRNA	4187348	4200527	+	ENSSSCT00000008313	ENSSSCG00000007575	RADIL	Ras association and DIL domains [Source:HGNC Symbol;Acc:HGNC:22226]	4293148	4363672	-	92620	downstream
chr3	LNC_000493	XLOC_042722	--	Novel_lncRNA	97535451	97547603	-	ENSSSCT00000024756	ENSSSCG00000029084	FSHR	follicle-stimulating hormone receptor precursor [Source:RefSeq peptide;Acc:NP_999551]	97500987	97591897	+	-12153	antisense
chr3	LNC_000492	XLOC_042437	--	Novel_lncRNA	71020957	71027586	-	ENSSSCT00000031635	ENSSSCG00000021546	GCFC2	GC-rich sequence DNA-binding factor 2 [Source:HGNC Symbol;Acc:HGNC:1317]	71111823	71133223	-	84236	downstream
chr3	LNC_000492	XLOC_042437	--	Novel_lncRNA	71020957	71027586	-	ENSSSCT00000023158	ENSSSCG00000021007	MRPL19	mitochondrial ribosomal protein L19 [Source:HGNC Symbol;Acc:HGNC:14052]	71096620	71107445	+	69033	upstream
chr3	LNC_000492	XLOC_042437	--	Novel_lncRNA	71020957	71027586	-	ENSSSCT00000023923	ENSSSCG00000021287	--	--	70994304	71011545	+	9411	downstream
chr13	ALDBSSCT0000003121	ALDBSSCG0000001873	--	Annotated_lncRNA	43546067	43546609	-	ENSSSCT00000012550	ENSSSCG00000011468	SLMAP	sarcolemma associated protein [Source:HGNC Symbol;Acc:HGNC:16643]	43455340	43545275	-	791	upstream
chr15	ALDBSSCT0000004580	ALDBSSCG0000002784	--	Annotated_lncRNA	117344949	117350079	-	ENSSSCT00000029321	ENSSSCG00000022225	NOP58	NOP58 ribonucleoprotein [Source:HGNC Symbol;Acc:HGNC:29926]	117351067	117375010	+	987	upstream
chr15	ALDBSSCT0000004580	ALDBSSCG0000002784	--	Annotated_lncRNA	117344949	117350079	-	ENSSSCT00000034414	ENSSSCG00000016113	BMPR2	bone morphogenetic protein receptor type II [Source:HGNC Symbol;Acc:HGNC:1078]	117425964	117426867	+	75884	upstream
chr15	ALDBSSCT0000004580	ALDBSSCG0000002784	--	Annotated_lncRNA	117344949	117350079	-	ENSSSCT00000017544	ENSSSCG00000016113	BMPR2	bone morphogenetic protein receptor type II [Source:HGNC Symbol;Acc:HGNC:1078]	117426776	117589050	+	76696	upstream
chr6	ALDBSSCT0000008893	ALDBSSCG0000005434	--	Annotated_lncRNA	57378291	57383982	+	ENSSSCT00000031894	ENSSSCG00000021888	ZNF135	zinc finger protein 135 [Source:HGNC Symbol;Acc:HGNC:12919]	57360023	57365666	+	12624	downstream
chr6	ALDBSSCT0000008893	ALDBSSCG0000005434	--	Annotated_lncRNA	57378291	57383982	+	ENSSSCT00000004416	ENSSSCG00000003994	C19orf18	chromosome 19 open reading frame 18 [Source:HGNC Symbol;Acc:HGNC:28642]	57272176	57281258	-	97032	upstream
chr6	ALDBSSCT0000008893	ALDBSSCG0000005434	--	Annotated_lncRNA	57378291	57383982	+	ENSSSCT00000004418	ENSSSCG00000003995	ZNF606	zinc finger protein 606 [Source:HGNC Symbol;Acc:HGNC:25879]	57292699	57314691	-	63599	upstream
chr6	ALDBSSCT0000008893	ALDBSSCG0000005434	--	Annotated_lncRNA	57378291	57383982	+	ENSSSCT00000024659	ENSSSCG00000023027	ZNF329	zinc finger protein 329 [Source:HGNC Symbol;Acc:HGNC:14209]	57397903	57399516	-	13920	downstream
chr3	ALDBSSCT0000007038	ALDBSSCG0000004284	--	Annotated_lncRNA	18229078	18234270	-	ENSSSCT00000008542	ENSSSCG00000007794	--	--	18248554	18251635	+	14283	upstream
chr3	ALDBSSCT0000007038	ALDBSSCG0000004284	--	Annotated_lncRNA	18229078	18234270	-	ENSSSCT00000032601	ENSSSCG00000007797	ITGAL	integrin subunit alpha L [Source:HGNC Symbol;Acc:HGNC:6148]	18259622	18298434	+	25351	upstream
chr3	ALDBSSCT0000007038	ALDBSSCG0000004284	--	Annotated_lncRNA	18229078	18234270	-	ENSSSCT00000008541	ENSSSCG00000007793	--	--	18237635	18237907	+	3364	upstream
chr3	ALDBSSCT0000007038	ALDBSSCG0000004284	--	Annotated_lncRNA	18229078	18234270	-	ENSSSCT00000008544	ENSSSCG00000007796	DCTPP1	dCTP pyrophosphatase 1 [Source:HGNC Symbol;Acc:HGNC:28777]	18312091	18315959	-	77820	downstream
chr3	ALDBSSCT0000007038	ALDBSSCG0000004284	--	Annotated_lncRNA	18229078	18234270	-	ENSSSCT00000008545	ENSSSCG00000007797	ITGAL	integrin subunit alpha L [Source:HGNC Symbol;Acc:HGNC:6148]	18259593	18298947	+	25322	upstream
chr3	ALDBSSCT0000007038	ALDBSSCG0000004284	--	Annotated_lncRNA	18229078	18234270	-	ENSSSCT00000025954	ENSSSCG00000024303	--	--	18235943	18237502	+	1672	upstream
chr3	ALDBSSCT0000007038	ALDBSSCG0000004284	--	Annotated_lncRNA	18229078	18234270	-	ENSSSCT00000026147	ENSSSCG00000025794	FBRS	fibrosin [Source:HGNC Symbol;Acc:HGNC:20442]	18187484	18193499	-	35578	upstream
chr3	ALDBSSCT0000007038	ALDBSSCG0000004284	--	Annotated_lncRNA	18229078	18234270	-	ENSSSCT00000008538	ENSSSCG00000007790	PRR14	proline rich 14 [Source:HGNC Symbol;Acc:HGNC:28458]	18201805	18207387	-	21690	upstream
chr3	ALDBSSCT0000007038	ALDBSSCG0000004284	--	Annotated_lncRNA	18229078	18234270	-	ENSSSCT00000008537	ENSSSCG00000007789	--	--	18110834	18159227	-	69850	upstream
chr3	ALDBSSCT0000007038	ALDBSSCG0000004284	--	Annotated_lncRNA	18229078	18234270	-	ENSSSCT00000031261	ENSSSCG00000023349	ZNF768	zinc finger protein 768 [Source:HGNC Symbol;Acc:HGNC:26273]	18303135	18306438	-	68864	downstream
chr3	ALDBSSCT0000007038	ALDBSSCG0000004284	--	Annotated_lncRNA	18229078	18234270	-	ENSSSCT00000008533	ENSSSCG00000007785	ZNF689	zinc finger protein 689 [Source:HGNC Symbol;Acc:HGNC:25173]	18223254	18227270	+	1807	downstream
chr3	ALDBSSCT0000007038	ALDBSSCG0000004284	--	Annotated_lncRNA	18229078	18234270	-	ENSSSCT00000008543	ENSSSCG00000007795	SEPHS2	selenophosphate synthetase 2 [Source:HGNC Symbol;Acc:HGNC:19686]	18324062	18325417	-	89791	downstream
chr3	ALDBSSCT0000007039	ALDBSSCG0000004284	--	Annotated_lncRNA	18229078	18234337	-	ENSSSCT00000008542	ENSSSCG00000007794	--	--	18248554	18251635	+	14216	upstream
chr3	ALDBSSCT0000007039	ALDBSSCG0000004284	--	Annotated_lncRNA	18229078	18234337	-	ENSSSCT00000032601	ENSSSCG00000007797	ITGAL	integrin subunit alpha L [Source:HGNC Symbol;Acc:HGNC:6148]	18259622	18298434	+	25284	upstream
chr3	ALDBSSCT0000007039	ALDBSSCG0000004284	--	Annotated_lncRNA	18229078	18234337	-	ENSSSCT00000008541	ENSSSCG00000007793	--	--	18237635	18237907	+	3297	upstream
chr3	ALDBSSCT0000007039	ALDBSSCG0000004284	--	Annotated_lncRNA	18229078	18234337	-	ENSSSCT00000008544	ENSSSCG00000007796	DCTPP1	dCTP pyrophosphatase 1 [Source:HGNC Symbol;Acc:HGNC:28777]	18312091	18315959	-	77753	downstream
chr3	ALDBSSCT0000007039	ALDBSSCG0000004284	--	Annotated_lncRNA	18229078	18234337	-	ENSSSCT00000008545	ENSSSCG00000007797	ITGAL	integrin subunit alpha L [Source:HGNC Symbol;Acc:HGNC:6148]	18259593	18298947	+	25255	upstream
chr3	ALDBSSCT0000007039	ALDBSSCG0000004284	--	Annotated_lncRNA	18229078	18234337	-	ENSSSCT00000025954	ENSSSCG00000024303	--	--	18235943	18237502	+	1605	upstream
chr3	ALDBSSCT0000007039	ALDBSSCG0000004284	--	Annotated_lncRNA	18229078	18234337	-	ENSSSCT00000026147	ENSSSCG00000025794	FBRS	fibrosin [Source:HGNC Symbol;Acc:HGNC:20442]	18187484	18193499	-	35578	upstream
chr3	ALDBSSCT0000007039	ALDBSSCG0000004284	--	Annotated_lncRNA	18229078	18234337	-	ENSSSCT00000008538	ENSSSCG00000007790	PRR14	proline rich 14 [Source:HGNC Symbol;Acc:HGNC:28458]	18201805	18207387	-	21690	upstream
chr3	ALDBSSCT0000007039	ALDBSSCG0000004284	--	Annotated_lncRNA	18229078	18234337	-	ENSSSCT00000008537	ENSSSCG00000007789	--	--	18110834	18159227	-	69850	upstream
chr3	ALDBSSCT0000007039	ALDBSSCG0000004284	--	Annotated_lncRNA	18229078	18234337	-	ENSSSCT00000031261	ENSSSCG00000023349	ZNF768	zinc finger protein 768 [Source:HGNC Symbol;Acc:HGNC:26273]	18303135	18306438	-	68797	downstream
chr3	ALDBSSCT0000007039	ALDBSSCG0000004284	--	Annotated_lncRNA	18229078	18234337	-	ENSSSCT00000008533	ENSSSCG00000007785	ZNF689	zinc finger protein 689 [Source:HGNC Symbol;Acc:HGNC:25173]	18223254	18227270	+	1807	downstream
chr3	ALDBSSCT0000007039	ALDBSSCG0000004284	--	Annotated_lncRNA	18229078	18234337	-	ENSSSCT00000008543	ENSSSCG00000007795	SEPHS2	selenophosphate synthetase 2 [Source:HGNC Symbol;Acc:HGNC:19686]	18324062	18325417	-	89724	downstream
chr6	ALDBSSCT0000008870	ALDBSSCG0000005420	--	Annotated_lncRNA	52055851	52063194	+	ENSSSCT00000003604	ENSSSCG00000003244	--	--	51959390	51992422	-	63428	upstream
chr6	ALDBSSCT0000008870	ALDBSSCG0000005420	--	Annotated_lncRNA	52055851	52063194	+	ENSSSCT00000003600	ENSSSCG00000003241	ZNF614	zinc finger protein 614 [Source:HGNC Symbol;Acc:HGNC:24722]	52086596	52088047	+	23401	upstream
chr6	ALDBSSCT0000008870	ALDBSSCG0000005420	--	Annotated_lncRNA	52055851	52063194	+	ENSSSCT00000003603	ENSSSCG00000003243	--	--	52011706	52051380	+	4470	downstream
chr13	ALDBSSCT0000003346	ALDBSSCG0000002013	--	Annotated_lncRNA	160470294	160477435	-	ENSSSCT00000013066	ENSSSCG00000011941	IFT57	intraflagellar transport 57 [Source:HGNC Symbol;Acc:HGNC:17367]	160336836	160394841	+	75452	downstream
chr13	ALDBSSCT0000003346	ALDBSSCG0000002013	--	Annotated_lncRNA	160470294	160477435	-	ENSSSCT00000013068	ENSSSCG00000011942	CD47	leukocyte surface antigen CD47 precursor [Source:RefSeq peptide;Acc:NP_999147]	160478687	160518107	-	1251	downstream
chr13	ALDBSSCT0000003346	ALDBSSCG0000002013	--	Annotated_lncRNA	160470294	160477435	-	ENSSSCT00000034144	ENSSSCG00000030727	CD47	-	160558666	160558970	+	81230	upstream
chr13	ALDBSSCT0000003347	ALDBSSCG0000002013	--	Annotated_lncRNA	160470294	160477475	-	ENSSSCT00000013066	ENSSSCG00000011941	IFT57	intraflagellar transport 57 [Source:HGNC Symbol;Acc:HGNC:17367]	160336836	160394841	+	75452	downstream
chr13	ALDBSSCT0000003347	ALDBSSCG0000002013	--	Annotated_lncRNA	160470294	160477475	-	ENSSSCT00000013068	ENSSSCG00000011942	CD47	leukocyte surface antigen CD47 precursor [Source:RefSeq peptide;Acc:NP_999147]	160478687	160518107	-	1211	downstream
chr13	ALDBSSCT0000003347	ALDBSSCG0000002013	--	Annotated_lncRNA	160470294	160477475	-	ENSSSCT00000034144	ENSSSCG00000030727	CD47	-	160558666	160558970	+	81190	upstream
chr6	ALDBSSCT0000008879	ALDBSSCG0000005426	--	Annotated_lncRNA	54602687	54608041	+	ENSSSCT00000031117	ENSSSCG00000025343	ZNF628	zinc finger protein 628 [Source:HGNC Symbol;Acc:HGNC:28054]	54509488	54512750	-	89936	upstream
chr6	ALDBSSCT0000008879	ALDBSSCG0000005426	--	Annotated_lncRNA	54602687	54608041	+	ENSSSCT00000030389	ENSSSCG00000027059	--	--	54619255	54621982	+	11213	upstream
chr6	ALDBSSCT0000008879	ALDBSSCG0000005426	--	Annotated_lncRNA	54602687	54608041	+	ENSSSCT00000023731	ENSSSCG00000024661	ZNF524	zinc finger protein 524 [Source:HGNC Symbol;Acc:HGNC:28322]	54542963	54546070	+	56616	downstream
chr6	ALDBSSCT0000008879	ALDBSSCG0000005426	--	Annotated_lncRNA	54602687	54608041	+	ENSSSCT00000026906	ENSSSCG00000022936	FIZ1	FLT3-interacting zinc finger 1 [Source:HGNC Symbol;Acc:HGNC:25917]	54505638	54508830	-	93856	upstream
chr6	ALDBSSCT0000008879	ALDBSSCG0000005426	--	Annotated_lncRNA	54602687	54608041	+	ENSSSCT00000022447	ENSSSCG00000029007	--	--	54614150	54617236	-	6108	downstream
chr6	ALDBSSCT0000008879	ALDBSSCG0000005426	--	Annotated_lncRNA	54602687	54608041	+	ENSSSCT00000023944	ENSSSCG00000022319	ZNF784	zinc finger protein 784 [Source:HGNC Symbol;Acc:HGNC:33111]	54591824	54592639	+	10047	downstream
chr6	ALDBSSCT0000008879	ALDBSSCG0000005426	--	Annotated_lncRNA	54602687	54608041	+	ENSSSCT00000023868	ENSSSCG00000023137	--	--	54700537	54735350	+	92495	upstream
chr6	ALDBSSCT0000008879	ALDBSSCG0000005426	--	Annotated_lncRNA	54602687	54608041	+	ENSSSCT00000029278	ENSSSCG00000024247	SBK2	SH3 domain binding kinase family member 2 [Source:HGNC Symbol;Acc:HGNC:34416]	54633361	54636989	-	25319	downstream
chr6	ALDBSSCT0000008879	ALDBSSCG0000005426	--	Annotated_lncRNA	54602687	54608041	+	ENSSSCT00000003653	ENSSSCG00000003289	ISOC2	isochorismatase domain containing 2 [Source:HGNC Symbol;Acc:HGNC:26278]	54537560	54542884	+	59802	downstream
chrX	ALDBSSCT0000012072	ALDBSSCG0000007361	--	Annotated_lncRNA	116291439	116294026	-	ENSSSCT00000033242	ENSSSCG00000012642	STAG2	stromal antigen 2 [Source:HGNC Symbol;Acc:HGNC:11355]	116392501	116431903	+	98474	upstream
chrX	ALDBSSCT0000012072	ALDBSSCG0000007361	--	Annotated_lncRNA	116291439	116294026	-	ENSSSCT00000013823	ENSSSCG00000012642	STAG2	stromal antigen 2 [Source:HGNC Symbol;Acc:HGNC:11355]	116341278	116433646	+	47251	upstream
chrX	ALDBSSCT0000012072	ALDBSSCG0000007361	--	Annotated_lncRNA	116291439	116294026	-	ENSSSCT00000032720	ENSSSCG00000025028	XIAP	baculoviral IAP repeat containing 8 [Source:HGNC Symbol;Acc:HGNC:14878]	116235107	116252050	+	39388	downstream
chrX	ALDBSSCT0000012072	ALDBSSCG0000007361	--	Annotated_lncRNA	116291439	116294026	-	ENSSSCT00000033199	ENSSSCG00000012642	STAG2	stromal antigen 2 [Source:HGNC Symbol;Acc:HGNC:11355]	116392501	116433499	+	98474	upstream
chrX	ALDBSSCT0000012072	ALDBSSCG0000007361	--	Annotated_lncRNA	116291439	116294026	-	ENSSSCT00000029211	ENSSSCG00000025028	XIAP	baculoviral IAP repeat containing 8 [Source:HGNC Symbol;Acc:HGNC:14878]	116234268	116253050	+	38388	downstream
chr12	ALDBSSCT0000002527	ALDBSSCG0000001527	--	Annotated_lncRNA	60857279	60869610	-	ENSSSCT00000025240	ENSSSCG00000025046	-	COX10 homolog, cytochrome c oxidase assembly protein, heme A: farnesyltransferase [Source:RefSeq peptide;Acc:NP_001231555]	60937010	60944691	-	67399	downstream
chr16	LNC_000381	XLOC_031589	--	Novel_lncRNA	34186618	34195138	-	ENSSSCT00000035674	ENSSSCG00000016885	ITGA1	integrin subunit alpha 1 [Source:HGNC Symbol;Acc:HGNC:6134]	34131320	34137391	+	49226	downstream
chr16	LNC_000381	XLOC_031589	--	Novel_lncRNA	34186618	34195138	-	ENSSSCT00000018389	ENSSSCG00000016885	ITGA1	integrin subunit alpha 1 [Source:HGNC Symbol;Acc:HGNC:6134]	33941071	34131333	+	55284	downstream
chr16	LNC_000381	XLOC_031589	--	Novel_lncRNA	34186618	34195138	-	ENSSSCT00000033593	ENSSSCG00000016885	ITGA1	integrin subunit alpha 1 [Source:HGNC Symbol;Acc:HGNC:6134]	34095143	34133950	+	52667	downstream
chr16	LNC_000381	XLOC_031589	--	Novel_lncRNA	34186618	34195138	-	ENSSSCT00000018392	ENSSSCG00000016888	MOCS2	molybdenum cofactor synthesis 2 [Source:HGNC Symbol;Acc:HGNC:7193]	34269654	34290773	-	74515	downstream
chr16	LNC_000381	XLOC_031589	--	Novel_lncRNA	34186618	34195138	-	ENSSSCT00000018391	ENSSSCG00000016887	ITGA2	integrin subunit alpha 2 [Source:HGNC Symbol;Acc:HGNC:6137]	34164830	34262490	+	-8521	antisense
chr16	LNC_000381	XLOC_031589	--	Novel_lncRNA	34186618	34195138	-	ENSSSCT00000032891	ENSSSCG00000016887	ITGA2	integrin subunit alpha 2 [Source:HGNC Symbol;Acc:HGNC:6137]	34164849	34265784	+	-8521	antisense
chr16	LNC_000380	XLOC_031522	--	Novel_lncRNA	27575547	27693883	-	ENSSSCT00000018366	ENSSSCG00000016863	OXCT1	3-oxoacid CoA-transferase 1 [Source:HGNC Symbol;Acc:HGNC:8527]	27700507	27924262	-	6623	downstream
chr16	LNC_000380	XLOC_031522	--	Novel_lncRNA	27575547	27693883	-	ENSSSCT00000018365	ENSSSCG00000016862	PLCXD3	phosphatidylinositol-specific phospholipase C, X domain containing 3 [Source:HGNC Symbol;Acc:HGNC:31822]	27423920	27534214	-	41332	upstream
chr16	LNC_000383	XLOC_031893	--	Novel_lncRNA	42306678	42318363	-	ENSSSCT00000018439	ENSSSCG00000016932	DEPDC1B	DEP domain containing 1B [Source:HGNC Symbol;Acc:HGNC:24902]	42378460	42469251	-	60096	downstream
chr16	LNC_000382	XLOC_031792	--	Novel_lncRNA	41617926	41620817	-	ENSSSCT00000018438	ENSSSCG00000030594	--	--	41665551	41666009	-	44733	downstream
chr17	LNC_000387	XLOC_032565	--	Novel_lncRNA	16013140	16013923	+	ENSSSCT00000024842	ENSSSCG00000024507	--	--	16102615	16156952	-	88691	downstream
chr17	LNC_000387	XLOC_032565	--	Novel_lncRNA	16013140	16013923	+	ENSSSCT00000023191	ENSSSCG00000024507	--	--	16102615	16156952	-	88691	downstream
chr17	LNC_000387	XLOC_032565	--	Novel_lncRNA	16013140	16013923	+	ENSSSCT00000007716	ENSSSCG00000007047	MCM8	minichromosome maintenance 8 homologous recombination repair factor [Source:HGNC Symbol;Acc:HGNC:16147]	15920503	15943915	+	69224	downstream
chr17	LNC_000387	XLOC_032565	--	Novel_lncRNA	16013140	16013923	+	ENSSSCT00000007717	ENSSSCG00000007048	CRLS1	cardiolipin synthase 1 [Source:HGNC Symbol;Acc:HGNC:16148]	15975173	16005862	+	7277	downstream
chr17	LNC_000387	XLOC_032565	--	Novel_lncRNA	16013140	16013923	+	ENSSSCT00000007718	ENSSSCG00000007049	LRRN4	leucine rich repeat neuronal 4 [Source:HGNC Symbol;Acc:HGNC:16208]	16010187	16021981	-	-784	antisense
chr17	LNC_000387	XLOC_032565	--	Novel_lncRNA	16013140	16013923	+	ENSSSCT00000027613	ENSSSCG00000024507	--	--	16104380	16157048	-	90456	downstream
chr17	LNC_000388	XLOC_032584	--	Novel_lncRNA	18783305	18784664	+	ENSSSCT00000027927	ENSSSCG00000027439	HAO1	hydroxyacid oxidase (glycolate oxidase) 1 [Source:HGNC Symbol;Acc:HGNC:4809]	18814427	18870834	-	29762	downstream
chr5	LNC_000543	XLOC_047043	--	Novel_lncRNA	67994636	68000841	+	ENSSSCT00000000784	ENSSSCG00000000721	DYRK4	dual specificity tyrosine-(Y)-phosphorylation regulated kinase 4 [Source:HGNC Symbol;Acc:HGNC:3095]	68022319	68047436	-	21477	downstream
chr5	LNC_000543	XLOC_047043	--	Novel_lncRNA	67994636	68000841	+	ENSSSCT00000000785	ENSSSCG00000000722	RAD51AP1	RAD51 associated protein 1 [Source:HGNC Symbol;Acc:HGNC:16956]	68079112	68103087	-	78270	downstream
chr5	LNC_000543	XLOC_047043	--	Novel_lncRNA	67994636	68000841	+	ENSSSCT00000000781	ENSSSCG00000000718	GALNT8	polypeptide N-acetylgalactosaminyltransferase 8 [Source:HGNC Symbol;Acc:HGNC:4130]	67903769	67941362	-	53273	upstream
chr5	LNC_000543	XLOC_047043	--	Novel_lncRNA	67994636	68000841	+	ENSSSCT00000000782	ENSSSCG00000000719	--	--	67965977	67994531	-	104	upstream
chr5	LNC_000543	XLOC_047043	--	Novel_lncRNA	67994636	68000841	+	ENSSSCT00000000783	ENSSSCG00000000720	AKAP3	A-kinase anchoring protein 3 [Source:HGNC Symbol;Acc:HGNC:373]	68003279	68020465	+	2437	upstream
chr5	LNC_000542	XLOC_047020	--	Novel_lncRNA	66659014	66660943	+	ENSSSCT00000000766	ENSSSCG00000000704	TAPBPL	TAP binding protein-like [Source:HGNC Symbol;Acc:HGNC:30683]	66647211	66658624	-	389	upstream
chr5	LNC_000542	XLOC_047020	--	Novel_lncRNA	66659014	66660943	+	ENSSSCT00000000767	ENSSSCG00000000705	CD27	CD27 molecule [Source:HGNC Symbol;Acc:HGNC:11922]	66658752	66664135	-	-1930	antisense
chr5	LNC_000542	XLOC_047020	--	Novel_lncRNA	66659014	66660943	+	ENSSSCT00000000764	ENSSSCG00000000702	ZNF384	zinc finger protein 384 [Source:HGNC Symbol;Acc:HGNC:11955]	66564824	66578433	+	80580	downstream
chr5	LNC_000542	XLOC_047020	--	Novel_lncRNA	66659014	66660943	+	ENSSSCT00000000765	ENSSSCG00000000703	VAMP1	vesicle associated membrane protein 1 [Source:HGNC Symbol;Acc:HGNC:12642]	66646135	66647743	+	11270	downstream
chr5	LNC_000542	XLOC_047020	--	Novel_lncRNA	66659014	66660943	+	ENSSSCT00000033152	ENSSSCG00000000705	CD27	CD27 molecule [Source:HGNC Symbol;Acc:HGNC:11922]	66658787	66663973	-	-1930	antisense
chr5	LNC_000542	XLOC_047020	--	Novel_lncRNA	66659014	66660943	+	ENSSSCT00000000768	ENSSSCG00000000706	LTBR	Sus scrofa lymphotoxin beta receptor (TNFR superfamily, member 3) (LTBR), mRNA. [Source:RefSeq mRNA;Acc:NM_001308823]	66732882	66739987	-	71938	downstream
chr5	LNC_000542	XLOC_047020	--	Novel_lncRNA	66659014	66660943	+	ENSSSCT00000000769	ENSSSCG00000000707	SCNN1A	sodium channel, non voltage gated 1 alpha subunit [Source:HGNC Symbol;Acc:HGNC:10599]	66749072	66773949	+	88128	upstream
chr5	LNC_000541	XLOC_046959	--	Novel_lncRNA	63826618	63834197	+	ENSSSCT00000023444	ENSSSCG00000000628	--	--	63803707	63805537	-	21080	upstream
chr5	LNC_000541	XLOC_046959	--	Novel_lncRNA	63826618	63834197	+	ENSSSCT00000000674	ENSSSCG00000000628	--	--	63803464	63806127	-	20490	upstream
chr5	LNC_000541	XLOC_046959	--	Novel_lncRNA	63826618	63834197	+	ENSSSCT00000000676	ENSSSCG00000000629	-	basic proline-rich protein precursor [Source:RefSeq peptide;Acc:NP_001092050]	63816468	63819555	+	7062	downstream
chr5	LNC_000541	XLOC_046959	--	Novel_lncRNA	63826618	63834197	+	ENSSSCT00000000675	ENSSSCG00000000629	-	basic proline-rich protein precursor [Source:RefSeq peptide;Acc:NP_001092050]	63816468	63819555	+	7062	downstream
chr5	LNC_000540	XLOC_046959	--	Novel_lncRNA	63826487	63834197	+	ENSSSCT00000023444	ENSSSCG00000000628	--	--	63803707	63805537	-	20949	upstream
chr5	LNC_000540	XLOC_046959	--	Novel_lncRNA	63826487	63834197	+	ENSSSCT00000000674	ENSSSCG00000000628	--	--	63803464	63806127	-	20359	upstream
chr5	LNC_000540	XLOC_046959	--	Novel_lncRNA	63826487	63834197	+	ENSSSCT00000000676	ENSSSCG00000000629	-	basic proline-rich protein precursor [Source:RefSeq peptide;Acc:NP_001092050]	63816468	63819555	+	6931	downstream
chr5	LNC_000540	XLOC_046959	--	Novel_lncRNA	63826487	63834197	+	ENSSSCT00000000675	ENSSSCG00000000629	-	basic proline-rich protein precursor [Source:RefSeq peptide;Acc:NP_001092050]	63816468	63819555	+	6931	downstream
chr5	LNC_000547	XLOC_047285	--	Novel_lncRNA	81339223	81343247	+	ENSSSCT00000032274	ENSSSCG00000020864	VDR	Vitamin D3 receptor [Source:UniProtKB/Swiss-Prot;Acc:A3RGC1]	81277766	81339276	-	-54	antisense
chr5	LNC_000547	XLOC_047285	--	Novel_lncRNA	81339223	81343247	+	ENSSSCT00000031661	ENSSSCG00000027859	HDAC7	histone deacetylase 7 [Source:HGNC Symbol;Acc:HGNC:14067]	81391566	81393566	-	48318	downstream
chr5	LNC_000547	XLOC_047285	--	Novel_lncRNA	81339223	81343247	+	ENSSSCT00000000884	ENSSSCG00000028397	--	--	81398648	81404929	+	55400	upstream
chr5	LNC_000546	XLOC_047134	--	Novel_lncRNA	71722115	71729751	+	ENSSSCT00000032650	ENSSSCG00000000765	IL17RA	interleukin 17 receptor A [Source:HGNC Symbol;Acc:HGNC:5985]	71778781	71779588	+	49029	upstream
chr5	LNC_000546	XLOC_047134	--	Novel_lncRNA	71722115	71729751	+	ENSSSCT00000033709	ENSSSCG00000000765	IL17RA	interleukin 17 receptor A [Source:HGNC Symbol;Acc:HGNC:5985]	71776427	71778550	+	46675	upstream
chr5	LNC_000546	XLOC_047134	--	Novel_lncRNA	71722115	71729751	+	ENSSSCT00000000827	ENSSSCG00000000763	CACNA1C	calcium channel, voltage-dependent, L type, alpha 1C subunit [Source:HGNC Symbol;Acc:HGNC:1390]	71597106	71682658	+	39456	downstream
chr5	LNC_000546	XLOC_047134	--	Novel_lncRNA	71722115	71729751	+	ENSSSCT00000000829	ENSSSCG00000000765	IL17RA	interleukin 17 receptor A [Source:HGNC Symbol;Acc:HGNC:5985]	71771559	71776996	+	41807	upstream
chr5	LNC_000546	XLOC_047134	--	Novel_lncRNA	71722115	71729751	+	ENSSSCT00000000828	ENSSSCG00000000764	--	--	71739300	71747619	-	9548	downstream
chr5	LNC_000546	XLOC_047134	--	Novel_lncRNA	71722115	71729751	+	ENSSSCT00000030429	ENSSSCG00000027725	--	--	71756585	71817700	-	26833	downstream
chr5	LNC_000546	XLOC_047134	--	Novel_lncRNA	71722115	71729751	+	ENSSSCT00000033369	ENSSSCG00000000765	IL17RA	interleukin 17 receptor A [Source:HGNC Symbol;Acc:HGNC:5985]	71771559	71778550	+	41807	upstream
chr5	LNC_000545	XLOC_047051	--	Novel_lncRNA	69482180	69487530	+	ENSSSCT00000029857	ENSSSCG00000000739	FOXM1	forkhead box M1 [Source:HGNC Symbol;Acc:HGNC:3818]	69532861	69549919	+	45330	upstream
chr5	LNC_000545	XLOC_047051	--	Novel_lncRNA	69482180	69487530	+	ENSSSCT00000000799	ENSSSCG00000000736	TEAD4	TEA domain family member 4 [Source:HGNC Symbol;Acc:HGNC:11717]	69417021	69481222	-	957	upstream
chr5	LNC_000545	XLOC_047051	--	Novel_lncRNA	69482180	69487530	+	ENSSSCT00000000798	ENSSSCG00000000735	TSPAN9	tetraspanin 9 [Source:HGNC Symbol;Acc:HGNC:21640]	69219130	69394433	-	87746	upstream
chr5	LNC_000545	XLOC_047051	--	Novel_lncRNA	69482180	69487530	+	ENSSSCT00000000803	ENSSSCG00000000739	FOXM1	forkhead box M1 [Source:HGNC Symbol;Acc:HGNC:3818]	69532861	69549919	+	45330	upstream
chr5	LNC_000545	XLOC_047051	--	Novel_lncRNA	69482180	69487530	+	ENSSSCT00000000802	ENSSSCG00000000738	RHNO1	RAD9-HUS1-RAD1 interacting nuclear orphan 1 [Source:HGNC Symbol;Acc:HGNC:28206]	69526435	69532789	-	38904	downstream
chr5	LNC_000545	XLOC_047051	--	Novel_lncRNA	69482180	69487530	+	ENSSSCT00000000801	ENSSSCG00000000737	TULP3	tubby like protein 3 [Source:HGNC Symbol;Acc:HGNC:12425]	69488422	69508649	-	891	downstream
chr5	LNC_000545	XLOC_047051	--	Novel_lncRNA	69482180	69487530	+	ENSSSCT00000000800	ENSSSCG00000000736	TEAD4	TEA domain family member 4 [Source:HGNC Symbol;Acc:HGNC:11717]	69417021	69481222	-	957	upstream
chr5	LNC_000545	XLOC_047051	--	Novel_lncRNA	69482180	69487530	+	ENSSSCT00000000806	ENSSSCG00000000742	ITFG2	integrin alpha FG-GAP repeat containing 2 [Source:HGNC Symbol;Acc:HGNC:30879]	69578548	69592357	-	91017	downstream
chr5	LNC_000545	XLOC_047051	--	Novel_lncRNA	69482180	69487530	+	ENSSSCT00000000805	ENSSSCG00000000741	NRIP2	nuclear receptor interacting protein 2 [Source:HGNC Symbol;Acc:HGNC:23078]	69568131	69576516	+	80600	upstream
chr5	LNC_000545	XLOC_047051	--	Novel_lncRNA	69482180	69487530	+	ENSSSCT00000000804	ENSSSCG00000000740	--	--	69550476	69556641	+	62945	upstream
chr5	LNC_000544	XLOC_047043	--	Novel_lncRNA	67994656	68000841	+	ENSSSCT00000000784	ENSSSCG00000000721	DYRK4	dual specificity tyrosine-(Y)-phosphorylation regulated kinase 4 [Source:HGNC Symbol;Acc:HGNC:3095]	68022319	68047436	-	21477	downstream
chr5	LNC_000544	XLOC_047043	--	Novel_lncRNA	67994656	68000841	+	ENSSSCT00000000785	ENSSSCG00000000722	RAD51AP1	RAD51 associated protein 1 [Source:HGNC Symbol;Acc:HGNC:16956]	68079112	68103087	-	78270	downstream
chr5	LNC_000544	XLOC_047043	--	Novel_lncRNA	67994656	68000841	+	ENSSSCT00000000781	ENSSSCG00000000718	GALNT8	polypeptide N-acetylgalactosaminyltransferase 8 [Source:HGNC Symbol;Acc:HGNC:4130]	67903769	67941362	-	53293	upstream
chr5	LNC_000544	XLOC_047043	--	Novel_lncRNA	67994656	68000841	+	ENSSSCT00000000782	ENSSSCG00000000719	--	--	67965977	67994531	-	124	upstream
chr5	LNC_000544	XLOC_047043	--	Novel_lncRNA	67994656	68000841	+	ENSSSCT00000000783	ENSSSCG00000000720	AKAP3	A-kinase anchoring protein 3 [Source:HGNC Symbol;Acc:HGNC:373]	68003279	68020465	+	2437	upstream
chr5	LNC_000549	XLOC_047561	--	Novel_lncRNA	1284078	1294192	-	ENSSSCT00000029170	ENSSSCG00000029644	--	--	1340593	1345277	-	46400	downstream
chr5	LNC_000549	XLOC_047561	--	Novel_lncRNA	1284078	1294192	-	ENSSSCT00000000014	ENSSSCG00000000013	SMC1B	structural maintenance of chromosomes 1B [Source:HGNC Symbol;Acc:HGNC:11112]	1209965	1280679	+	3398	downstream
chr5	LNC_000549	XLOC_047561	--	Novel_lncRNA	1284078	1294192	-	ENSSSCT00000000015	ENSSSCG00000000014	--	--	1294484	1315514	-	291	downstream
chr5	LNC_000549	XLOC_047561	--	Novel_lncRNA	1284078	1294192	-	ENSSSCT00000000016	ENSSSCG00000000015	UPK3A	uroplakin 3A [Source:HGNC Symbol;Acc:HGNC:12580]	1324340	1373617	-	30147	downstream
chr5	LNC_000549	XLOC_047561	--	Novel_lncRNA	1284078	1294192	-	ENSSSCT00000000010	ENSSSCG00000024718	--	--	1200225	1209799	-	74278	upstream
chr5	LNC_000549	XLOC_047561	--	Novel_lncRNA	1284078	1294192	-	ENSSSCT00000000012	ENSSSCG00000000011	--	--	1350948	1361091	-	56755	downstream
chr5	LNC_000548	XLOC_047378	--	Novel_lncRNA	91441985	91444157	+	ENSSSCT00000027848	ENSSSCG00000023803	ELK3	ELK3, ETS-domain protein (SRF accessory protein 2) [Source:HGNC Symbol;Acc:HGNC:3325]	91504838	91536271	-	60680	downstream
chr5	LNC_000548	XLOC_047378	--	Novel_lncRNA	91441985	91444157	+	ENSSSCT00000032012	ENSSSCG00000028182	--	--	91460900	91499981	+	16742	upstream
GL893006.1	ALDBSSCT0000011804	ALDBSSCG0000007163	--	Annotated_lncRNA	27220	28222	+	ENSSSCT00000022719	ENSSSCG00000026670	--	--	1371	22655	+	4564	downstream
GL893006.1	ALDBSSCT0000011804	ALDBSSCG0000007163	--	Annotated_lncRNA	27220	28222	+	ENSSSCT00000030613	ENSSSCG00000022513	--	--	39240	52698	+	11017	upstream
chr3	ALDBSSCT0000007107	ALDBSSCG0000004323	--	Annotated_lncRNA	39866204	39914443	-	ENSSSCT00000008718	ENSSSCG00000007955	CLUAP1	clusterin associated protein 1 [Source:HGNC Symbol;Acc:HGNC:19009]	40002954	40022546	+	88510	upstream
chr3	ALDBSSCT0000007107	ALDBSSCG0000004323	--	Annotated_lncRNA	39866204	39914443	-	ENSSSCT00000008717	ENSSSCG00000007954	SLX4	SLX4 structure-specific endonuclease subunit [Source:HGNC Symbol;Acc:HGNC:23845]	39969677	39988141	+	55233	upstream
chr3	ALDBSSCT0000007107	ALDBSSCG0000004323	--	Annotated_lncRNA	39866204	39914443	-	ENSSSCT00000008716	ENSSSCG00000007953	DNASE1	deoxyribonuclease I [Source:HGNC Symbol;Acc:HGNC:2956]	39862785	39865618	-	585	upstream
chr3	ALDBSSCT0000007107	ALDBSSCG0000004323	--	Annotated_lncRNA	39866204	39914443	-	ENSSSCT00000008715	ENSSSCG00000007952	TRAP1	TNF receptor-associated protein 1 [Source:RefSeq peptide;Acc:NP_001230874]	39804652	39862836	+	3367	downstream
chr3	ALDBSSCT0000007107	ALDBSSCG0000004323	--	Annotated_lncRNA	39866204	39914443	-	ENSSSCT00000008714	ENSSSCG00000007951	CREBBP	CREB binding protein [Source:HGNC Symbol;Acc:HGNC:2348]	39539012	39798202	+	68001	downstream
chr3	ALDBSSCT0000007107	ALDBSSCG0000004323	--	Annotated_lncRNA	39866204	39914443	-	ENSSSCT00000034723	ENSSSCG00000007951	CREBBP	CREB binding protein [Source:HGNC Symbol;Acc:HGNC:2348]	39539031	39770346	+	95857	downstream
chr3	ALDBSSCT0000007107	ALDBSSCG0000004323	--	Annotated_lncRNA	39866204	39914443	-	ENSSSCT00000029019	ENSSSCG00000007955	CLUAP1	clusterin associated protein 1 [Source:HGNC Symbol;Acc:HGNC:19009]	40002954	40022546	+	88510	upstream
chr3	ALDBSSCT0000007109	ALDBSSCG0000004325	--	Annotated_lncRNA	40063804	40068561	-	ENSSSCT00000008722	ENSSSCG00000007959	OR2C1	olfactory receptor family 2 subfamily C member 1 [Source:HGNC Symbol;Acc:HGNC:8242]	40133010	40134031	+	64448	upstream
chr3	ALDBSSCT0000007109	ALDBSSCG0000004325	--	Annotated_lncRNA	40063804	40068561	-	ENSSSCT00000008719	ENSSSCG00000007956	NLRC3	NLR family, CARD domain containing 3 [Source:HGNC Symbol;Acc:HGNC:29889]	40030863	40049513	-	14290	upstream
chr3	ALDBSSCT0000007109	ALDBSSCG0000004325	--	Annotated_lncRNA	40063804	40068561	-	ENSSSCT00000008718	ENSSSCG00000007955	CLUAP1	clusterin associated protein 1 [Source:HGNC Symbol;Acc:HGNC:19009]	40002954	40022546	+	41257	downstream
chr3	ALDBSSCT0000007109	ALDBSSCG0000004325	--	Annotated_lncRNA	40063804	40068561	-	ENSSSCT00000008717	ENSSSCG00000007954	SLX4	SLX4 structure-specific endonuclease subunit [Source:HGNC Symbol;Acc:HGNC:23845]	39969677	39988141	+	75662	downstream
chr3	ALDBSSCT0000007109	ALDBSSCG0000004325	--	Annotated_lncRNA	40063804	40068561	-	ENSSSCT00000008720	ENSSSCG00000007957	C16orf90	chromosome 16 open reading frame 90 [Source:HGNC Symbol;Acc:HGNC:34455]	40121677	40123022	+	53115	upstream
chr3	ALDBSSCT0000007109	ALDBSSCG0000004325	--	Annotated_lncRNA	40063804	40068561	-	ENSSSCT00000029019	ENSSSCG00000007955	CLUAP1	clusterin associated protein 1 [Source:HGNC Symbol;Acc:HGNC:19009]	40002954	40022546	+	41257	downstream
chr2	ALDBSSCT0000006453	ALDBSSCG0000003937	--	Annotated_lncRNA	140550670	140552295	-	ENSSSCT00000015607	ENSSSCG00000014284	CCNI2	cyclin I family member 2 [Source:HGNC Symbol;Acc:HGNC:33869]	140542665	140547652	+	3017	downstream
chr2	ALDBSSCT0000006453	ALDBSSCG0000003937	--	Annotated_lncRNA	140550670	140552295	-	ENSSSCT00000015606	ENSSSCG00000014283	KIF3A	kinesin family member 3A [Source:HGNC Symbol;Acc:HGNC:6319]	140468005	140537950	-	12719	upstream
chr2	ALDBSSCT0000006453	ALDBSSCG0000003937	--	Annotated_lncRNA	140550670	140552295	-	ENSSSCT00000015605	ENSSSCG00000014282	IL4	Interleukin-4 [Source:UniProtKB/Swiss-Prot;Acc:Q04745]	140455331	140462879	+	87790	downstream
chr2	ALDBSSCT0000006453	ALDBSSCG0000003937	--	Annotated_lncRNA	140550670	140552295	-	ENSSSCT00000015609	ENSSSCG00000014286	SOWAHA	sosondowah ankyrin repeat domain family member A [Source:HGNC Symbol;Acc:HGNC:27033]	140608193	140609920	+	55897	upstream
chr2	ALDBSSCT0000006453	ALDBSSCG0000003937	--	Annotated_lncRNA	140550670	140552295	-	ENSSSCT00000015608	ENSSSCG00000014285	2017-09-08	septin 8 [Source:HGNC Symbol;Acc:HGNC:16511]	140556381	140561689	-	4085	downstream
chr2	ALDBSSCT0000006453	ALDBSSCG0000003937	--	Annotated_lncRNA	140550670	140552295	-	ENSSSCT00000029548	ENSSSCG00000014284	CCNI2	cyclin I family member 2 [Source:HGNC Symbol;Acc:HGNC:33869]	140542665	140547652	+	3017	downstream
chr2	ALDBSSCT0000006453	ALDBSSCG0000003937	--	Annotated_lncRNA	140550670	140552295	-	ENSSSCT00000015610	ENSSSCG00000014287	SHROOM1	shroom family member 1 [Source:HGNC Symbol;Acc:HGNC:24084]	140617550	140626147	-	65254	downstream
chr2	ALDBSSCT0000006453	ALDBSSCG0000003937	--	Annotated_lncRNA	140550670	140552295	-	ENSSSCT00000015611	ENSSSCG00000014288	GDF9	growth differentiation factor 9 [Source:HGNC Symbol;Acc:HGNC:4224]	140649596	140653771	-	97300	downstream
chr2	ALDBSSCT0000006180	ALDBSSCG0000003778	--	Annotated_lncRNA	12903561	12909123	-	ENSSSCT00000014401	ENSSSCG00000013181	SERPING1	serpin peptidase inhibitor, clade G (C1 inhibitor), member 1 [Source:HGNC Symbol;Acc:HGNC:1228]	12957679	12972235	-	48555	downstream
chr2	ALDBSSCT0000006180	ALDBSSCG0000003778	--	Annotated_lncRNA	12903561	12909123	-	ENSSSCT00000030523	ENSSSCG00000023379	UBE2L6	ubiquitin conjugating enzyme E2L 6 [Source:HGNC Symbol;Acc:HGNC:12490]	12987517	13002993	+	78393	upstream
chr2	ALDBSSCT0000006180	ALDBSSCG0000003778	--	Annotated_lncRNA	12903561	12909123	-	ENSSSCT00000014398	ENSSSCG00000013178	ZDHHC5	zinc finger, DHHC-type containing 5 [Source:HGNC Symbol;Acc:HGNC:18472]	12884998	12902901	-	659	upstream
chr2	ALDBSSCT0000006180	ALDBSSCG0000003778	--	Annotated_lncRNA	12903561	12909123	-	ENSSSCT00000014399	ENSSSCG00000013179	CLP1	cleavage and polyadenylation factor I subunit 1 [Source:HGNC Symbol;Acc:HGNC:16999]	12915354	12918379	-	6230	downstream
chr2	ALDBSSCT0000006180	ALDBSSCG0000003778	--	Annotated_lncRNA	12903561	12909123	-	ENSSSCT00000014396	ENSSSCG00000013176	--	--	12863476	12874283	-	29277	upstream
chr2	ALDBSSCT0000006180	ALDBSSCG0000003778	--	Annotated_lncRNA	12903561	12909123	-	ENSSSCT00000014397	ENSSSCG00000013177	MED19	mediator complex subunit 19 [Source:HGNC Symbol;Acc:HGNC:29600]	12874305	12884978	+	18582	downstream
chr2	ALDBSSCT0000006180	ALDBSSCG0000003778	--	Annotated_lncRNA	12903561	12909123	-	ENSSSCT00000014394	ENSSSCG00000013174	CTNND1	catenin delta 1 [Source:HGNC Symbol;Acc:HGNC:2515]	12787522	12842278	-	61282	upstream
chr2	ALDBSSCT0000006180	ALDBSSCG0000003778	--	Annotated_lncRNA	12903561	12909123	-	ENSSSCT00000014395	ENSSSCG00000013175	BTBD18	BTB (POZ) domain containing 18 [Source:HGNC Symbol;Acc:HGNC:37214]	12852988	12860528	+	43032	downstream
chr2	ALDBSSCT0000006180	ALDBSSCG0000003778	--	Annotated_lncRNA	12903561	12909123	-	ENSSSCT00000033188	ENSSSCG00000013181	SERPING1	serpin peptidase inhibitor, clade G (C1 inhibitor), member 1 [Source:HGNC Symbol;Acc:HGNC:1228]	12957691	12972234	-	48567	downstream
chr2	ALDBSSCT0000006180	ALDBSSCG0000003778	--	Annotated_lncRNA	12903561	12909123	-	ENSSSCT00000014400	ENSSSCG00000013180	YPEL4	yippee like 4 [Source:HGNC Symbol;Acc:HGNC:18328]	12922587	12927632	+	13463	upstream
chr2	ALDBSSCT0000006187	ALDBSSCG0000003784	--	Annotated_lncRNA	17593047	17599056	-	ENSSSCT00000014483	ENSSSCG00000013259	DGKZ	diacylglycerol kinase, zeta [Source:HGNC Symbol;Acc:HGNC:2857]	17479273	17519709	-	73337	upstream
chr2	ALDBSSCT0000006187	ALDBSSCG0000003784	--	Annotated_lncRNA	17593047	17599056	-	ENSSSCT00000014487	ENSSSCG00000013263	CREB3L1	cAMP responsive element binding protein 3-like 1 [Source:HGNC Symbol;Acc:HGNC:18856]	17530359	17564950	-	28096	upstream
chr9	ALDBSSCT0000011638	ALDBSSCG0000007063	--	Annotated_lncRNA	102937494	102941886	-	ENSSSCT00000016769	ENSSSCG00000015394	KIAA1324L	KIAA1324-like [Source:HGNC Symbol;Acc:HGNC:21945]	103019596	103204485	+	77709	upstream
chr9	ALDBSSCT0000011638	ALDBSSCG0000007063	--	Annotated_lncRNA	102937494	102941886	-	ENSSSCT00000016768	ENSSSCG00000015393	DMTF1	cyclin D binding myb-like transcription factor 1 [Source:HGNC Symbol;Acc:HGNC:14603]	102893256	102929921	-	7572	upstream
chr9	ALDBSSCT0000011638	ALDBSSCG0000007063	--	Annotated_lncRNA	102937494	102941886	-	ENSSSCT00000026505	ENSSSCG00000025326	TMEM243	transmembrane protein 243 [Source:HGNC Symbol;Acc:HGNC:21707]	102873679	102900245	+	37248	downstream
chr13	ALDBSSCT0000002740	ALDBSSCG0000001661	--	Annotated_lncRNA	98830069	98837979	+	ENSSSCT00000012818	ENSSSCG00000011708	TSC22D2	TSC22 domain family member 2 [Source:HGNC Symbol;Acc:HGNC:29095]	98711135	98761458	+	68610	downstream
chr13	ALDBSSCT0000002740	ALDBSSCG0000001661	--	Annotated_lncRNA	98830069	98837979	+	ENSSSCT00000012820	ENSSSCG00000011710	EIF2A	eukaryotic translation initiation factor 2A [Source:HGNC Symbol;Acc:HGNC:3254]	98845701	98862686	-	7721	downstream
chr13	ALDBSSCT0000002740	ALDBSSCG0000001661	--	Annotated_lncRNA	98830069	98837979	+	ENSSSCT00000030003	ENSSSCG00000011708	TSC22D2	TSC22 domain family member 2 [Source:HGNC Symbol;Acc:HGNC:29095]	98711135	98761458	+	68610	downstream
chr13	ALDBSSCT0000002740	ALDBSSCG0000001661	--	Annotated_lncRNA	98830069	98837979	+	ENSSSCT00000028119	ENSSSCG00000028477	SERP1	stress-associated endoplasmic reticulum protein 1 [Source:HGNC Symbol;Acc:HGNC:10759]	98827874	98829536	-	532	upstream
chr17	ALDBSSCT0000005167	ALDBSSCG0000003119	--	Annotated_lncRNA	45907318	45908592	+	ENSSSCT00000027233	ENSSSCG00000025673	--	--	45802388	45828607	+	78710	downstream
chr17	ALDBSSCT0000005167	ALDBSSCG0000003119	--	Annotated_lncRNA	45907318	45908592	+	ENSSSCT00000033397	ENSSSCG00000007334	SRC	SRC proto-oncogene, non-receptor tyrosine kinase [Source:HGNC Symbol;Acc:HGNC:11283]	45918951	45940163	+	10358	upstream
chr17	ALDBSSCT0000005167	ALDBSSCG0000003119	--	Annotated_lncRNA	45907318	45908592	+	ENSSSCT00000008023	ENSSSCG00000007332	--	--	45876581	45887092	-	20225	upstream
chr17	ALDBSSCT0000005167	ALDBSSCG0000003119	--	Annotated_lncRNA	45907318	45908592	+	ENSSSCT00000027093	ENSSSCG00000028227	--	--	45863308	45874955	-	32362	upstream
chr17	ALDBSSCT0000005167	ALDBSSCG0000003119	--	Annotated_lncRNA	45907318	45908592	+	ENSSSCT00000034998	ENSSSCG00000007334	SRC	SRC proto-oncogene, non-receptor tyrosine kinase [Source:HGNC Symbol;Acc:HGNC:11283]	45918877	45921898	+	10284	upstream
chr17	ALDBSSCT0000005167	ALDBSSCG0000003119	--	Annotated_lncRNA	45907318	45908592	+	ENSSSCT00000008025	ENSSSCG00000007334	SRC	SRC proto-oncogene, non-receptor tyrosine kinase [Source:HGNC Symbol;Acc:HGNC:11283]	45920503	45939926	+	11910	upstream
chr17	ALDBSSCT0000005167	ALDBSSCG0000003119	--	Annotated_lncRNA	45907318	45908592	+	ENSSSCT00000033033	ENSSSCG00000007334	SRC	SRC proto-oncogene, non-receptor tyrosine kinase [Source:HGNC Symbol;Acc:HGNC:11283]	45918951	45940163	+	10358	upstream
chr9	ALDBSSCT0000011149	ALDBSSCG0000006764	--	Annotated_lncRNA	39888942	39893105	+	ENSSSCT00000023237	ENSSSCG00000026833	MSANTD4	Myb/SANT-like DNA-binding domain containing 4 with coiled-coils [Source:HGNC Symbol;Acc:HGNC:29383]	39864770	39875768	-	13173	upstream
chr9	ALDBSSCT0000011149	ALDBSSCG0000006764	--	Annotated_lncRNA	39888942	39893105	+	ENSSSCT00000027751	ENSSSCG00000030565	GRIA4	glutamate receptor, ionotropic, AMPA 4 [Source:HGNC Symbol;Acc:HGNC:4574]	39464926	39841255	+	47686	downstream
chr9	ALDBSSCT0000011149	ALDBSSCG0000006764	--	Annotated_lncRNA	39888942	39893105	+	ENSSSCT00000016363	ENSSSCG00000014999	KBTBD3	kelch repeat and BTB (POZ) domain containing 3 [Source:HGNC Symbol;Acc:HGNC:22934]	39910815	39920566	-	17709	downstream
chr9	ALDBSSCT0000011149	ALDBSSCG0000006764	--	Annotated_lncRNA	39888942	39893105	+	ENSSSCT00000016362	ENSSSCG00000014998	AASDHPPT	aminoadipate-semialdehyde dehydrogenase-phosphopantetheinyl transferase [Source:HGNC Symbol;Acc:HGNC:14235]	39939906	39984846	+	46800	upstream
chr2	ALDBSSCT0000005769	ALDBSSCG0000003505	--	Annotated_lncRNA	1464623	1467783	+	ENSSSCT00000027596	ENSSSCG00000022123	--	--	1487597	1488346	+	19813	upstream
chr2	ALDBSSCT0000005769	ALDBSSCG0000003505	--	Annotated_lncRNA	1464623	1467783	+	ENSSSCT00000035749	ENSSSCG00000030888	FADD	protein FADD [Source:RefSeq peptide;Acc:NP_001026967]	1388619	1390090	+	74532	downstream
chr2	ALDBSSCT0000005769	ALDBSSCG0000003505	--	Annotated_lncRNA	1464623	1467783	+	ENSSSCT00000022998	ENSSSCG00000021469	--	--	1508154	1518080	+	40370	upstream
chr2	ALDBSSCT0000005769	ALDBSSCG0000003505	--	Annotated_lncRNA	1464623	1467783	+	ENSSSCT00000029095	ENSSSCG00000029328	FADD	Fas associated via death domain [Source:HGNC Symbol;Acc:HGNC:3573]	1563459	1567755	-	95675	downstream
chr2	ALDBSSCT0000005769	ALDBSSCG0000003505	--	Annotated_lncRNA	1464623	1467783	+	ENSSSCT00000028464	ENSSSCG00000022579	--	--	1469314	1477594	+	1530	upstream
chr14	ALDBSSCT0000003905	ALDBSSCG0000002347	--	Annotated_lncRNA	49655106	49657660	-	ENSSSCT00000010945	ENSSSCG00000009988	NIPSNAP1	nipsnap homolog 1 (C. elegans) [Source:HGNC Symbol;Acc:HGNC:7827]	49658212	49675678	-	551	downstream
chr14	ALDBSSCT0000003905	ALDBSSCG0000002347	--	Annotated_lncRNA	49655106	49657660	-	ENSSSCT00000010943	ENSSSCG00000028707	--	--	49688038	49758063	+	30377	upstream
chr14	ALDBSSCT0000003905	ALDBSSCG0000002347	--	Annotated_lncRNA	49655106	49657660	-	ENSSSCT00000010935	ENSSSCG00000009979	NEFH	neurofilament, heavy polypeptide [Source:HGNC Symbol;Acc:HGNC:7737]	49575093	49581592	+	73513	downstream
chr14	ALDBSSCT0000003903	ALDBSSCG0000002347	--	Annotated_lncRNA	49655106	49657382	-	ENSSSCT00000010945	ENSSSCG00000009988	NIPSNAP1	nipsnap homolog 1 (C. elegans) [Source:HGNC Symbol;Acc:HGNC:7827]	49658212	49675678	-	829	downstream
chr14	ALDBSSCT0000003903	ALDBSSCG0000002347	--	Annotated_lncRNA	49655106	49657382	-	ENSSSCT00000010943	ENSSSCG00000028707	--	--	49688038	49758063	+	30655	upstream
chr14	ALDBSSCT0000003903	ALDBSSCG0000002347	--	Annotated_lncRNA	49655106	49657382	-	ENSSSCT00000010935	ENSSSCG00000009979	NEFH	neurofilament, heavy polypeptide [Source:HGNC Symbol;Acc:HGNC:7737]	49575093	49581592	+	73513	downstream
chr11	ALDBSSCT0000001886	ALDBSSCG0000001141	--	Annotated_lncRNA	6809063	6819486	-	ENSSSCT00000010220	ENSSSCG00000009326	KATNAL1	katanin p60 subunit A-like 1 [Source:HGNC Symbol;Acc:HGNC:28361]	6760617	6803995	-	5067	upstream
chr11	ALDBSSCT0000001885	ALDBSSCG0000001141	--	Annotated_lncRNA	6809063	6819245	-	ENSSSCT00000010220	ENSSSCG00000009326	KATNAL1	katanin p60 subunit A-like 1 [Source:HGNC Symbol;Acc:HGNC:28361]	6760617	6803995	-	5067	upstream
chr18	ALDBSSCT0000005503	ALDBSSCG0000003335	--	Annotated_lncRNA	32046733	32066601	+	ENSSSCT00000018114	ENSSSCG00000016636	TES	testin [Source:RefSeq peptide;Acc:NP_001116672]	31991911	32014016	-	32716	upstream
chr9	ALDBSSCT0000011142	ALDBSSCG0000006759	--	Annotated_lncRNA	38080137	38091710	+	ENSSSCT00000016356	ENSSSCG00000014993	DYNC2H1	dynein, cytoplasmic 2, heavy chain 1 [Source:HGNC Symbol;Acc:HGNC:2962]	37891503	38005567	+	74569	downstream
chr1	LNC_000150	XLOC_010160	--	Novel_lncRNA	278334557	278339142	+	ENSSSCT00000005976	ENSSSCG00000005432	RPS16	ribosomal protein S16 [Source:HGNC Symbol;Acc:HGNC:10396]	278301805	278302307	+	32249	downstream
chr1	LNC_000151	XLOC_010206	--	Novel_lncRNA	283177141	283179398	+	ENSSSCT00000006005	ENSSSCG00000005460	--	--	283217647	283224893	+	38248	upstream
chr1	LNC_000151	XLOC_010206	--	Novel_lncRNA	283177141	283179398	+	ENSSSCT00000006004	ENSSSCG00000005459	KIAA0368	KIAA0368 [Source:HGNC Symbol;Acc:HGNC:29020]	283049933	283120707	-	56433	upstream
chr1	LNC_000151	XLOC_010206	--	Novel_lncRNA	283177141	283179398	+	ENSSSCT00000028358	ENSSSCG00000021386	PTGR1	prostaglandin reductase 1 [Source:HGNC Symbol;Acc:HGNC:18429]	283170864	283176380	-	760	upstream
chr1	LNC_000151	XLOC_010206	--	Novel_lncRNA	283177141	283179398	+	ENSSSCT00000034525	ENSSSCG00000005462	GNG10	guanine nucleotide binding protein (G protein), gamma 10 [Source:HGNC Symbol;Acc:HGNC:4402]	283259091	283266477	+	79692	upstream
chr1	LNC_000151	XLOC_010206	--	Novel_lncRNA	283177141	283179398	+	ENSSSCT00000006009	ENSSSCG00000005463	C9orf84	chromosome 9 open reading frame 84 [Source:HGNC Symbol;Acc:HGNC:26535]	283272991	283277480	-	93592	downstream
chr1	LNC_000151	XLOC_010206	--	Novel_lncRNA	283177141	283179398	+	ENSSSCT00000006008	ENSSSCG00000005462	GNG10	guanine nucleotide binding protein (G protein), gamma 10 [Source:HGNC Symbol;Acc:HGNC:4402]	283259173	283266590	+	79774	upstream
chr1	LNC_000152	XLOC_010480	--	Novel_lncRNA	307554029	307557169	+	ENSSSCT00000006321	ENSSSCG00000005749	BRD3	bromodomain containing 3 [Source:HGNC Symbol;Acc:HGNC:1104]	307475101	307507430	-	46598	upstream
chr1	LNC_000152	XLOC_010480	--	Novel_lncRNA	307554029	307557169	+	ENSSSCT00000023586	ENSSSCG00000024912	WDR5	WD repeat domain 5 [Source:HGNC Symbol;Acc:HGNC:12757]	307533212	307551074	+	2954	downstream
chr11	ALDBSSCT0000001865	ALDBSSCG0000001128	--	Annotated_lncRNA	3470218	3471113	-	ENSSSCT00000028952	ENSSSCG00000023771	--	--	3257757	3423509	-	46708	upstream
chr11	ALDBSSCT0000001865	ALDBSSCG0000001128	--	Annotated_lncRNA	3470218	3471113	-	ENSSSCT00000010186	ENSSSCG00000009298	CDK8	cyclin-dependent kinase 8 [Source:HGNC Symbol;Acc:HGNC:1779]	3530444	3601260	+	59330	upstream
chr11	ALDBSSCT0000001865	ALDBSSCG0000001128	--	Annotated_lncRNA	3470218	3471113	-	ENSSSCT00000029736	ENSSSCG00000009298	CDK8	cyclin-dependent kinase 8 [Source:HGNC Symbol;Acc:HGNC:1779]	3530444	3545302	+	59330	upstream
chr11	ALDBSSCT0000001865	ALDBSSCG0000001128	--	Annotated_lncRNA	3470218	3471113	-	ENSSSCT00000024194	ENSSSCG00000024064	RNF6	ring finger protein (C3H2C3 type) 6 [Source:HGNC Symbol;Acc:HGNC:10069]	3460894	3467502	-	2715	upstream
chr1	ALDBSSCT0000000849	ALDBSSCG0000000514	--	Annotated_lncRNA	155388524	155395554	-	ENSSSCT00000005321	ENSSSCG00000004819	CERS3	ceramide synthase 3 [Source:HGNC Symbol;Acc:HGNC:23752]	155240103	155316168	-	72355	upstream
chr1	ALDBSSCT0000000849	ALDBSSCG0000000514	--	Annotated_lncRNA	155388524	155395554	-	ENSSSCT00000005323	ENSSSCG00000004821	ASB7	ankyrin repeat and SOCS box containing 7 [Source:HGNC Symbol;Acc:HGNC:17182]	155405691	155444614	+	10136	upstream
chr1	ALDBSSCT0000000849	ALDBSSCG0000000514	--	Annotated_lncRNA	155388524	155395554	-	ENSSSCT00000005322	ENSSSCG00000004820	LINS1	lines homolog 1 [Source:HGNC Symbol;Acc:HGNC:30922]	155373142	155381352	-	7171	upstream
chr1	ALDBSSCT0000000849	ALDBSSCG0000000514	--	Annotated_lncRNA	155388524	155395554	-	ENSSSCT00000028739	ENSSSCG00000004820	LINS1	lines homolog 1 [Source:HGNC Symbol;Acc:HGNC:30922]	155373142	155381328	-	7195	upstream
chr1	LNC_000156	XLOC_011323	--	Novel_lncRNA	89784929	89848969	-	ENSSSCT00000032353	ENSSSCG00000023610	MARCKS	myristoylated alanine-rich protein kinase C substrate [Source:HGNC Symbol;Acc:HGNC:6759]	89851192	89857552	+	2222	upstream
chr1	LNC_000156	XLOC_011323	--	Novel_lncRNA	89784929	89848969	-	ENSSSCT00000004897	ENSSSCG00000004432	HDAC2	histone deacetylase 2 [Source:HGNC Symbol;Acc:HGNC:4853]	89928273	89963141	-	79303	downstream
chr11	ALDBSSCT0000001866	ALDBSSCG0000001129	--	Annotated_lncRNA	3471748	3474068	-	ENSSSCT00000028952	ENSSSCG00000023771	--	--	3257757	3423509	-	48238	upstream
chr11	ALDBSSCT0000001866	ALDBSSCG0000001129	--	Annotated_lncRNA	3471748	3474068	-	ENSSSCT00000010186	ENSSSCG00000009298	CDK8	cyclin-dependent kinase 8 [Source:HGNC Symbol;Acc:HGNC:1779]	3530444	3601260	+	56375	upstream
chr11	ALDBSSCT0000001866	ALDBSSCG0000001129	--	Annotated_lncRNA	3471748	3474068	-	ENSSSCT00000029736	ENSSSCG00000009298	CDK8	cyclin-dependent kinase 8 [Source:HGNC Symbol;Acc:HGNC:1779]	3530444	3545302	+	56375	upstream
chr11	ALDBSSCT0000001866	ALDBSSCG0000001129	--	Annotated_lncRNA	3471748	3474068	-	ENSSSCT00000024194	ENSSSCG00000024064	RNF6	ring finger protein (C3H2C3 type) 6 [Source:HGNC Symbol;Acc:HGNC:10069]	3460894	3467502	-	4245	upstream
chr1	LNC_000158	XLOC_011323	--	Novel_lncRNA	89845335	89848969	-	ENSSSCT00000032353	ENSSSCG00000023610	MARCKS	myristoylated alanine-rich protein kinase C substrate [Source:HGNC Symbol;Acc:HGNC:6759]	89851192	89857552	+	2222	upstream
chr1	LNC_000158	XLOC_011323	--	Novel_lncRNA	89845335	89848969	-	ENSSSCT00000004897	ENSSSCG00000004432	HDAC2	histone deacetylase 2 [Source:HGNC Symbol;Acc:HGNC:4853]	89928273	89963141	-	79303	downstream
chr1	LNC_000159	XLOC_011323	--	Novel_lncRNA	89847699	89848969	-	ENSSSCT00000032353	ENSSSCG00000023610	MARCKS	myristoylated alanine-rich protein kinase C substrate [Source:HGNC Symbol;Acc:HGNC:6759]	89851192	89857552	+	2222	upstream
chr1	LNC_000159	XLOC_011323	--	Novel_lncRNA	89847699	89848969	-	ENSSSCT00000004897	ENSSSCG00000004432	HDAC2	histone deacetylase 2 [Source:HGNC Symbol;Acc:HGNC:4853]	89928273	89963141	-	79303	downstream
chr1	ALDBSSCT0000000847	ALDBSSCG0000000512	--	Annotated_lncRNA	154049974	154057648	-	ENSSSCT00000023715	ENSSSCG00000029613	SYNM	synemin [Source:HGNC Symbol;Acc:HGNC:24466]	154019851	154044632	+	5341	downstream
chr1	ALDBSSCT0000000847	ALDBSSCG0000000512	--	Annotated_lncRNA	154049974	154057648	-	ENSSSCT00000005313	ENSSSCG00000004813	TTC23	tetratricopeptide repeat domain 23 [Source:HGNC Symbol;Acc:HGNC:25730]	154058346	154169686	-	697	downstream
chr2	ALDBSSCT0000006272	ALDBSSCG0000003834	--	Annotated_lncRNA	49220742	49256853	-	ENSSSCT00000014635	ENSSSCG00000013397	--	--	49317637	49340140	-	60783	downstream
chr2	ALDBSSCT0000006272	ALDBSSCG0000003834	--	Annotated_lncRNA	49220742	49256853	-	ENSSSCT00000014634	ENSSSCG00000013396	ARNTL	aryl hydrocarbon receptor nuclear translocator like [Source:HGNC Symbol;Acc:HGNC:701]	49291904	49316939	+	35050	upstream
chr2	ALDBSSCT0000006272	ALDBSSCG0000003834	--	Annotated_lncRNA	49220742	49256853	-	ENSSSCT00000014631	ENSSSCG00000013394	PTH	parathyroid hormone [Source:HGNC Symbol;Acc:HGNC:9606]	49290017	49290958	-	33163	downstream
chr2	ALDBSSCT0000006272	ALDBSSCG0000003834	--	Annotated_lncRNA	49220742	49256853	-	ENSSSCT00000014632	ENSSSCG00000013395	BTBD10	BTB (POZ) domain containing 10 [Source:HGNC Symbol;Acc:HGNC:21445]	49163323	49215258	-	5483	upstream
chr2	ALDBSSCT0000006278	ALDBSSCG0000003837	--	Annotated_lncRNA	50583172	50615710	-	ENSSSCT00000028383	ENSSSCG00000021777	--	--	50496893	50513253	-	69918	upstream
chr2	ALDBSSCT0000006278	ALDBSSCG0000003837	--	Annotated_lncRNA	50583172	50615710	-	ENSSSCT00000014639	ENSSSCG00000013400	--	--	50485392	50492739	-	90432	upstream
chr2	ALDBSSCT0000006278	ALDBSSCG0000003837	--	Annotated_lncRNA	50583172	50615710	-	ENSSSCT00000014641	ENSSSCG00000013401	DKK3	dickkopf WNT signaling pathway inhibitor 3 [Source:HGNC Symbol;Acc:HGNC:2893]	50699985	50758475	+	84274	upstream
chr2	ALDBSSCT0000006278	ALDBSSCG0000003837	--	Annotated_lncRNA	50583172	50615710	-	ENSSSCT00000026578	ENSSSCG00000020731	--	--	50555135	50555470	-	27701	upstream
chr3	ENSSSCT00000009298	ENSSSCG00000008496	EIF2AK2	Annotated_lncRNA	109647099	109667347	+	ENSSSCT00000028150	ENSSSCG00000025181	--	--	109622373	109637816	-	9282	upstream
chr3	ENSSSCT00000009298	ENSSSCG00000008496	EIF2AK2	Annotated_lncRNA	109647099	109667347	+	ENSSSCT00000009299	ENSSSCG00000008497	GPATCH11	G-patch domain containing 11 [Source:HGNC Symbol;Acc:HGNC:26768]	109677473	109691729	-	10125	downstream
chr3	ENSSSCT00000009298	ENSSSCG00000008496	EIF2AK2	Annotated_lncRNA	109647099	109667347	+	ENSSSCT00000009300	ENSSSCG00000008498	HEATR5B	HEAT repeat containing 5B [Source:HGNC Symbol;Acc:HGNC:29273]	109692688	109810357	+	25340	upstream
chr17	ALDBSSCT0000005212	ALDBSSCG0000003147	--	Annotated_lncRNA	57151362	57158294	+	ENSSSCT00000023099	ENSSSCG00000029685	--	--	57168364	57176550	+	10069	upstream
chr17	ALDBSSCT0000005212	ALDBSSCG0000003147	--	Annotated_lncRNA	57151362	57158294	+	ENSSSCT00000008163	ENSSSCG00000007459	CSE1L	CSE1 chromosome segregation 1-like (yeast) [Source:HGNC Symbol;Acc:HGNC:2431]	57095159	57109228	+	42133	downstream
chr17	ALDBSSCT0000005212	ALDBSSCG0000003147	--	Annotated_lncRNA	57151362	57158294	+	ENSSSCT00000030602	ENSSSCG00000030108	--	--	57190145	57221225	+	31850	upstream
chr17	ALDBSSCT0000005212	ALDBSSCG0000003147	--	Annotated_lncRNA	57151362	57158294	+	ENSSSCT00000032453	ENSSSCG00000026672	--	--	57112953	57118021	-	33340	upstream
chr17	ALDBSSCT0000005212	ALDBSSCG0000003147	--	Annotated_lncRNA	57151362	57158294	+	ENSSSCT00000026255	ENSSSCG00000025534	--	--	57235514	57257623	+	77219	upstream
chr17	ALDBSSCT0000005212	ALDBSSCG0000003147	--	Annotated_lncRNA	57151362	57158294	+	ENSSSCT00000025578	ENSSSCG00000022915	--	--	57224592	57234179	-	66297	downstream
chr17	ALDBSSCT0000005212	ALDBSSCG0000003147	--	Annotated_lncRNA	57151362	57158294	+	ENSSSCT00000008164	ENSSSCG00000007460	ARFGEF2	ADP ribosylation factor guanine nucleotide exchange factor 2 [Source:HGNC Symbol;Acc:HGNC:15853]	56982745	57082783	+	68578	downstream
chr2	ALDBSSCT0000006024	ALDBSSCG0000003685	--	Annotated_lncRNA	131121961	131135113	+	ENSSSCT00000015553	ENSSSCG00000014235	SNCAIP	Sus scrofa synuclein, alpha interacting protein (SNCAIP), transcript variant 1a, mRNA. [Source:RefSeq mRNA;Acc:NM_001105054]	131097462	131120775	+	1185	downstream
chr17	ALDBSSCT0000005217	ALDBSSCG0000003152	--	Annotated_lncRNA	58544604	58564700	+	ENSSSCT00000026410	ENSSSCG00000007470	FAM65C	family with sequence similarity 65 member C [Source:HGNC Symbol;Acc:HGNC:16168]	58476089	58509813	-	34790	upstream
chr17	ALDBSSCT0000005217	ALDBSSCG0000003152	--	Annotated_lncRNA	58544604	58564700	+	ENSSSCT00000008175	ENSSSCG00000007470	FAM65C	family with sequence similarity 65 member C [Source:HGNC Symbol;Acc:HGNC:16168]	58476081	58505448	-	39155	upstream
chr17	ALDBSSCT0000005217	ALDBSSCG0000003152	--	Annotated_lncRNA	58544604	58564700	+	ENSSSCT00000024378	ENSSSCG00000027206	PARD6B	uncharacterized protein LOC100151957 [Source:RefSeq peptide;Acc:NP_001124004]	58583134	58653888	+	18433	upstream
chr17	ALDBSSCT0000005217	ALDBSSCG0000003152	--	Annotated_lncRNA	58544604	58564700	+	ENSSSCT00000008173	ENSSSCG00000007469	PTPN1	tyrosine-protein phosphatase non-receptor type 1 [Source:RefSeq peptide;Acc:NP_001106906]	58355133	58474149	+	70454	downstream
chr17	ALDBSSCT0000005217	ALDBSSCG0000003152	--	Annotated_lncRNA	58544604	58564700	+	ENSSSCT00000033093	ENSSSCG00000007469	PTPN1	tyrosine-protein phosphatase non-receptor type 1 [Source:RefSeq peptide;Acc:NP_001106906]	58469712	58471620	+	72983	downstream
GL892959.1	LNC_000025	XLOC_000835	--	Novel_lncRNA	117748	119016	+	ENSSSCT00000030388	ENSSSCG00000024358	--	--	127891	131499	-	8874	downstream
GL892959.1	LNC_000025	XLOC_000835	--	Novel_lncRNA	117748	119016	+	ENSSSCT00000025334	ENSSSCG00000024434	AP2B1	AP-2 complex subunit beta [Source:RefSeq peptide;Acc:NP_001230112]	2944	110725	+	7022	downstream
GL892995.2	LNC_000027	XLOC_000860	--	Novel_lncRNA	37113	41317	+	ENSSSCT00000032246	ENSSSCG00000029011	--	--	41534	44208	+	216	upstream
GL892813.1	LNC_000021	XLOC_000657	--	Novel_lncRNA	31046	38710	+	ENSSSCT00000024351	ENSSSCG00000022775	INO80E	INO80 complex subunit E [Source:HGNC Symbol;Acc:HGNC:26905]	6077	15041	+	16004	downstream
GL892813.1	LNC_000021	XLOC_000657	--	Novel_lncRNA	31046	38710	+	ENSSSCT00000032554	ENSSSCG00000022775	INO80E	INO80 complex subunit E [Source:HGNC Symbol;Acc:HGNC:26905]	6077	15041	+	16004	downstream
GL892813.1	LNC_000021	XLOC_000657	--	Novel_lncRNA	31046	38710	+	ENSSSCT00000028747	ENSSSCG00000027015	FAM57B	family with sequence similarity 57 member B [Source:HGNC Symbol;Acc:HGNC:25295]	29783	36771	-	-5726	antisense
GL892813.1	LNC_000021	XLOC_000657	--	Novel_lncRNA	31046	38710	+	ENSSSCT00000025446	ENSSSCG00000030122	HIRIP3	HIRA interacting protein 3 [Source:HGNC Symbol;Acc:HGNC:4917]	2162	5515	-	25530	upstream
GL892813.1	LNC_000021	XLOC_000657	--	Novel_lncRNA	31046	38710	+	ENSSSCT00000027532	ENSSSCG00000025797	--	--	19860	20009	-	11036	upstream
GL892813.1	LNC_000021	XLOC_000657	--	Novel_lncRNA	31046	38710	+	ENSSSCT00000025443	ENSSSCG00000029905	DOC2A	double C2-like domains, alpha [Source:HGNC Symbol;Acc:HGNC:2985]	17154	18997	-	12048	upstream
GL892813.1	LNC_000022	XLOC_000657	--	Novel_lncRNA	33201	38710	+	ENSSSCT00000024351	ENSSSCG00000022775	INO80E	INO80 complex subunit E [Source:HGNC Symbol;Acc:HGNC:26905]	6077	15041	+	18159	downstream
GL892813.1	LNC_000022	XLOC_000657	--	Novel_lncRNA	33201	38710	+	ENSSSCT00000032554	ENSSSCG00000022775	INO80E	INO80 complex subunit E [Source:HGNC Symbol;Acc:HGNC:26905]	6077	15041	+	18159	downstream
GL892813.1	LNC_000022	XLOC_000657	--	Novel_lncRNA	33201	38710	+	ENSSSCT00000028747	ENSSSCG00000027015	FAM57B	family with sequence similarity 57 member B [Source:HGNC Symbol;Acc:HGNC:25295]	29783	36771	-	-3571	antisense
GL892813.1	LNC_000022	XLOC_000657	--	Novel_lncRNA	33201	38710	+	ENSSSCT00000025446	ENSSSCG00000030122	HIRIP3	HIRA interacting protein 3 [Source:HGNC Symbol;Acc:HGNC:4917]	2162	5515	-	27685	upstream
GL892813.1	LNC_000022	XLOC_000657	--	Novel_lncRNA	33201	38710	+	ENSSSCT00000027532	ENSSSCG00000025797	--	--	19860	20009	-	13191	upstream
GL892813.1	LNC_000022	XLOC_000657	--	Novel_lncRNA	33201	38710	+	ENSSSCT00000025443	ENSSSCG00000029905	DOC2A	double C2-like domains, alpha [Source:HGNC Symbol;Acc:HGNC:2985]	17154	18997	-	14203	upstream
GL892813.1	LNC_000023	XLOC_000657	--	Novel_lncRNA	34619	38710	+	ENSSSCT00000024351	ENSSSCG00000022775	INO80E	INO80 complex subunit E [Source:HGNC Symbol;Acc:HGNC:26905]	6077	15041	+	19577	downstream
GL892813.1	LNC_000023	XLOC_000657	--	Novel_lncRNA	34619	38710	+	ENSSSCT00000032554	ENSSSCG00000022775	INO80E	INO80 complex subunit E [Source:HGNC Symbol;Acc:HGNC:26905]	6077	15041	+	19577	downstream
GL892813.1	LNC_000023	XLOC_000657	--	Novel_lncRNA	34619	38710	+	ENSSSCT00000028747	ENSSSCG00000027015	FAM57B	family with sequence similarity 57 member B [Source:HGNC Symbol;Acc:HGNC:25295]	29783	36771	-	-2153	antisense
GL892813.1	LNC_000023	XLOC_000657	--	Novel_lncRNA	34619	38710	+	ENSSSCT00000025446	ENSSSCG00000030122	HIRIP3	HIRA interacting protein 3 [Source:HGNC Symbol;Acc:HGNC:4917]	2162	5515	-	29103	upstream
GL892813.1	LNC_000023	XLOC_000657	--	Novel_lncRNA	34619	38710	+	ENSSSCT00000027532	ENSSSCG00000025797	--	--	19860	20009	-	14609	upstream
GL892813.1	LNC_000023	XLOC_000657	--	Novel_lncRNA	34619	38710	+	ENSSSCT00000025443	ENSSSCG00000029905	DOC2A	double C2-like domains, alpha [Source:HGNC Symbol;Acc:HGNC:2985]	17154	18997	-	15621	upstream
chr17	ALDBSSCT0000005183	ALDBSSCG0000003129	--	Annotated_lncRNA	49565729	49578420	+	ENSSSCT00000031310	ENSSSCG00000030224	--	--	49632039	49648316	+	53618	upstream
chr17	ALDBSSCT0000005183	ALDBSSCG0000003129	--	Annotated_lncRNA	49565729	49578420	+	ENSSSCT00000008053	ENSSSCG00000007360	--	--	49501791	49537135	-	28593	upstream
chr17	ALDBSSCT0000005183	ALDBSSCG0000003129	--	Annotated_lncRNA	49565729	49578420	+	ENSSSCT00000027570	ENSSSCG00000023698	--	--	49619218	49630879	+	40797	upstream
chr17	ALDBSSCT0000005183	ALDBSSCG0000003129	--	Annotated_lncRNA	49565729	49578420	+	ENSSSCT00000008056	ENSSSCG00000007361	--	--	49671331	49672874	-	92910	downstream
chr17	ALDBSSCT0000005180	ALDBSSCG0000003126	--	Annotated_lncRNA	47214004	47215890	+	ENSSSCT00000008042	ENSSSCG00000007350	PPP1R16B	protein phosphatase 1 regulatory subunit 16B [Source:HGNC Symbol;Acc:HGNC:15850]	47245805	47536983	+	29914	upstream
chr17	ALDBSSCT0000005180	ALDBSSCG0000003126	--	Annotated_lncRNA	47214004	47215890	+	ENSSSCT00000008041	ENSSSCG00000007349	ACTR5	ARP5 actin-related protein 5 homolog (yeast) [Source:HGNC Symbol;Acc:HGNC:14671]	47193722	47213176	+	827	downstream
chr17	ALDBSSCT0000005180	ALDBSSCG0000003126	--	Annotated_lncRNA	47214004	47215890	+	ENSSSCT00000008040	ENSSSCG00000007348	SLC32A1	solute carrier family 32 (GABA vesicular transporter), member 1 [Source:HGNC Symbol;Acc:HGNC:11018]	47180393	47185812	+	28191	downstream
chr8	ALDBSSCT0000010434	ALDBSSCG0000006339	--	Annotated_lncRNA	30782247	30784949	+	ENSSSCT00000009598	ENSSSCG00000008773	--	--	30718143	30753812	+	28434	downstream
chr8	ALDBSSCT0000010434	ALDBSSCG0000006339	--	Annotated_lncRNA	30782247	30784949	+	ENSSSCT00000029618	ENSSSCG00000027836	--	--	30793179	30793670	+	8229	upstream
chr8	ALDBSSCT0000010434	ALDBSSCG0000006339	--	Annotated_lncRNA	30782247	30784949	+	ENSSSCT00000022915	ENSSSCG00000028983	--	--	30863652	30891119	-	78702	downstream
chr1	ALDBSSCT0000000937	ALDBSSCG0000000578	--	Annotated_lncRNA	223964885	223969102	-	ENSSSCT00000005658	ENSSSCG00000005132	CDKN2B	cyclin-dependent kinase inhibitor 2B (p15, inhibits CDK4) [Source:HGNC Symbol;Acc:HGNC:1788]	223956057	223958921	+	5963	downstream
chr1	ALDBSSCT0000000937	ALDBSSCG0000000578	--	Annotated_lncRNA	223964885	223969102	-	ENSSSCT00000005661	ENSSSCG00000005134	CDKN2A	cyclin-dependent kinase inhibitor 2A [Source:HGNC Symbol;Acc:HGNC:1787]	223989851	223992651	-	20748	downstream
chr7	ALDBSSCT0000010184	ALDBSSCG0000006202	--	Annotated_lncRNA	63763302	63772012	-	ENSSSCT00000002134	ENSSSCG00000001905	--	--	63774840	63775439	+	2827	upstream
chr7	ALDBSSCT0000010184	ALDBSSCG0000006202	--	Annotated_lncRNA	63763302	63772012	-	ENSSSCT00000002136	ENSSSCG00000001907	UBL7	ubiquitin like 7 [Source:HGNC Symbol;Acc:HGNC:28221]	63686694	63700113	-	63188	upstream
chr17	ALDBSSCT0000005312	ALDBSSCG0000003216	--	Annotated_lncRNA	29866786	29870712	-	ENSSSCT00000007764	ENSSSCG00000007092	CSRP2BP	CSRP2 binding protein [Source:HGNC Symbol;Acc:HGNC:15904]	29969301	30010476	+	98588	upstream
chr17	ALDBSSCT0000005312	ALDBSSCG0000003216	--	Annotated_lncRNA	29866786	29870712	-	ENSSSCT00000007761	ENSSSCG00000007089	MGME1	mitochondrial genome maintenance exonuclease 1 [Source:HGNC Symbol;Acc:HGNC:16205]	29871217	29884809	+	504	upstream
chr17	ALDBSSCT0000005312	ALDBSSCG0000003216	--	Annotated_lncRNA	29866786	29870712	-	ENSSSCT00000007760	ENSSSCG00000007088	SNX5	sorting nexin 5 [Source:HGNC Symbol;Acc:HGNC:14969]	29776939	29797245	-	69540	upstream
chr13	ALDBSSCT0000002998	ALDBSSCG0000001798	--	Annotated_lncRNA	207620783	207626020	+	ENSSSCT00000031820	ENSSSCG00000026981	MRPS6	mitochondrial ribosomal protein S6 [Source:HGNC Symbol;Acc:HGNC:14051]	207569045	207586377	+	34405	downstream
chr13	ALDBSSCT0000002998	ALDBSSCG0000001798	--	Annotated_lncRNA	207620783	207626020	+	ENSSSCT00000028910	ENSSSCG00000023780	SLC5A3	solute carrier family 5 (sodium/myo-inositol cotransporter), member 3 [Source:HGNC Symbol;Acc:HGNC:11038]	207541727	207543337	+	77445	downstream
chr10	ALDBSSCT0000001464	ALDBSSCG0000000884	--	Annotated_lncRNA	25242268	25245674	-	ENSSSCT00000011926	ENSSSCG00000010900	DENND1B	DENN/MADD domain containing 1B [Source:HGNC Symbol;Acc:HGNC:28404]	25096498	25193569	+	48698	downstream
chr10	ALDBSSCT0000001464	ALDBSSCG0000000884	--	Annotated_lncRNA	25242268	25245674	-	ENSSSCT00000011929	ENSSSCG00000010902	C1orf53	chromosome 1 open reading frame 53 [Source:HGNC Symbol;Acc:HGNC:30003]	25341843	25347627	+	96168	upstream
chr10	ALDBSSCT0000001461	ALDBSSCG0000000881	--	Annotated_lncRNA	22232079	22240241	-	ENSSSCT00000028202	ENSSSCG00000030286	--	--	22256790	22267783	-	16548	downstream
chr10	ALDBSSCT0000001460	ALDBSSCG0000000881	--	Annotated_lncRNA	22228169	22232633	-	ENSSSCT00000028202	ENSSSCG00000030286	--	--	22256790	22267783	-	24156	downstream
chr7	ALDBSSCT0000010296	ALDBSSCG0000006258	--	Annotated_lncRNA	105955417	105959130	-	ENSSSCT00000002656	ENSSSCG00000002389	VASH1	vasohibin 1 [Source:HGNC Symbol;Acc:HGNC:19964]	105960537	105978240	+	1406	upstream
chr7	ALDBSSCT0000010296	ALDBSSCG0000006258	--	Annotated_lncRNA	105955417	105959130	-	ENSSSCT00000002657	ENSSSCG00000002390	ANGEL1	angel homolog 1 (Drosophila) [Source:HGNC Symbol;Acc:HGNC:19961]	105992708	105999604	+	33577	upstream
chr7	ALDBSSCT0000010296	ALDBSSCG0000006258	--	Annotated_lncRNA	105955417	105959130	-	ENSSSCT00000002659	ENSSSCG00000002391	LRRC74A	leucine rich repeat containing 74A [Source:HGNC Symbol;Acc:HGNC:23346]	106005464	106033717	+	46333	upstream
chr1	ENSSSCT00000020669	ENSSSCG00000019074	7SK	Annotated_lncRNA	41992344	41992658	+	ENSSSCT00000023225	ENSSSCG00000029277	NKAIN2	Na+/K+ transporting ATPase interacting 2 [Source:HGNC Symbol;Acc:HGNC:16443]	42059735	42198726	-	67076	downstream
chr4	ALDBSSCT0000007853	ALDBSSCG0000004754	--	Annotated_lncRNA	6127958	6134540	-	ENSSSCT00000035168	ENSSSCG00000005941	CU151851.1	-	6135474	6218979	-	933	downstream
chr4	ALDBSSCT0000007853	ALDBSSCG0000004754	--	Annotated_lncRNA	6127958	6134540	-	ENSSSCT00000006524	ENSSSCG00000005941	CU151851.1	-	6135478	6237881	-	937	downstream
chr8	ALDBSSCT0000010765	ALDBSSCG0000006517	--	Annotated_lncRNA	12166085	12237705	-	ENSSSCT00000022820	ENSSSCG00000029508	QDPR	quinoid dihydropteridine reductase [Source:HGNC Symbol;Acc:HGNC:9752]	12329454	12351892	-	91748	downstream
chr3	ALDBSSCT0000006856	ALDBSSCG0000004178	--	Annotated_lncRNA	120659769	120663895	+	ENSSSCT00000023785	ENSSSCG00000029413	DNMT3A	DNA (cytosine-5-)-methyltransferase 3 alpha [Source:HGNC Symbol;Acc:HGNC:2978]	120640567	120657717	+	2051	downstream
chr3	ALDBSSCT0000006856	ALDBSSCG0000004178	--	Annotated_lncRNA	120659769	120663895	+	ENSSSCT00000022430	ENSSSCG00000027338	--	--	120590623	120594846	+	64922	downstream
chr3	ALDBSSCT0000006856	ALDBSSCG0000004178	--	Annotated_lncRNA	120659769	120663895	+	ENSSSCT00000022509	ENSSSCG00000028366	--	--	120476759	120585993	+	73775	downstream
chr3	ALDBSSCT0000006858	ALDBSSCG0000004179	--	Annotated_lncRNA	121628683	121658017	+	ENSSSCT00000009393	ENSSSCG00000008583	ITSN2	intersectin 2 [Source:HGNC Symbol;Acc:HGNC:6184]	121668307	121773090	+	10289	upstream
chr9	ALDBSSCT0000011214	ALDBSSCG0000006807	--	Annotated_lncRNA	63142961	63152414	+	ENSSSCT00000016615	ENSSSCG00000015246	ST14	suppression of tumorigenicity 14 [Source:HGNC Symbol;Acc:HGNC:11344]	63159460	63176946	-	7045	downstream
chr9	ALDBSSCT0000011214	ALDBSSCG0000006807	--	Annotated_lncRNA	63142961	63152414	+	ENSSSCT00000016616	ENSSSCG00000015247	ZBTB44	zinc finger and BTB domain containing 44 [Source:HGNC Symbol;Acc:HGNC:25001]	63071808	63135751	+	7209	downstream
chr9	ALDBSSCT0000011214	ALDBSSCG0000006807	--	Annotated_lncRNA	63142961	63152414	+	ENSSSCT00000032122	ENSSSCG00000015247	ZBTB44	zinc finger and BTB domain containing 44 [Source:HGNC Symbol;Acc:HGNC:25001]	63071808	63136385	+	6575	downstream
chr7	ALDBSSCT0000009735	ALDBSSCG0000005937	--	Annotated_lncRNA	39641678	39669722	+	ENSSSCT00000029770	ENSSSCG00000025423	KCNK5	potassium channel, two pore domain subfamily K, member 5 [Source:HGNC Symbol;Acc:HGNC:6280]	39704035	39743285	-	34312	downstream
chr7	ALDBSSCT0000009735	ALDBSSCG0000005937	--	Annotated_lncRNA	39641678	39669722	+	ENSSSCT00000001769	ENSSSCG00000001589	GLP1R	glucagon-like peptide 1 receptor precursor [Source:RefSeq peptide;Acc:NP_001243523]	39595053	39623436	+	18241	downstream
chr7	ALDBSSCT0000009735	ALDBSSCG0000005937	--	Annotated_lncRNA	39641678	39669722	+	ENSSSCT00000001768	ENSSSCG00000001588	DNAH8	dynein, axonemal, heavy chain 8 [Source:HGNC Symbol;Acc:HGNC:2952]	39286129	39569290	+	72387	downstream
chr14	ALDBSSCT0000004033	ALDBSSCG0000002432	--	Annotated_lncRNA	117026952	117042983	-	ENSSSCT00000011485	ENSSSCG00000010497	ENTPD1	-	116930091	117022881	+	4070	downstream
chr14	ALDBSSCT0000004033	ALDBSSCG0000002432	--	Annotated_lncRNA	117026952	117042983	-	ENSSSCT00000011487	ENSSSCG00000010499	--	--	117093744	117097999	+	50760	upstream
chr14	ALDBSSCT0000004033	ALDBSSCG0000002432	--	Annotated_lncRNA	117026952	117042983	-	ENSSSCT00000011486	ENSSSCG00000010498	--	--	117050975	117059796	+	7991	upstream
chr14	ALDBSSCT0000004033	ALDBSSCG0000002432	--	Annotated_lncRNA	117026952	117042983	-	ENSSSCT00000011490	ENSSSCG00000010501	--	--	117112920	117138376	+	69936	upstream
chr14	ALDBSSCT0000004033	ALDBSSCG0000002432	--	Annotated_lncRNA	117026952	117042983	-	ENSSSCT00000033740	ENSSSCG00000010497	ENTPD1	-	116929633	116999103	+	27848	downstream
chr14	ALDBSSCT0000004033	ALDBSSCG0000002432	--	Annotated_lncRNA	117026952	117042983	-	ENSSSCT00000011489	ENSSSCG00000010501	--	--	117112920	117138376	+	69936	upstream
chr14	ALDBSSCT0000004033	ALDBSSCG0000002432	--	Annotated_lncRNA	117026952	117042983	-	ENSSSCT00000034626	ENSSSCG00000010497	ENTPD1	-	116930529	117001615	+	25336	downstream
chr14	ALDBSSCT0000004033	ALDBSSCG0000002432	--	Annotated_lncRNA	117026952	117042983	-	ENSSSCT00000036684	ENSSSCG00000010497	ENTPD1	-	116930091	117025486	+	1465	downstream
chr14	ALDBSSCT0000004033	ALDBSSCG0000002432	--	Annotated_lncRNA	117026952	117042983	-	ENSSSCT00000036234	ENSSSCG00000010497	ENTPD1	-	116930529	117013646	+	13305	downstream
chr14	ALDBSSCT0000004033	ALDBSSCG0000002432	--	Annotated_lncRNA	117026952	117042983	-	ENSSSCT00000034869	ENSSSCG00000010497	ENTPD1	-	116929633	117022890	+	4061	downstream
chr7	ALDBSSCT0000009736	ALDBSSCG0000005937	--	Annotated_lncRNA	39641840	39684170	+	ENSSSCT00000029770	ENSSSCG00000025423	KCNK5	potassium channel, two pore domain subfamily K, member 5 [Source:HGNC Symbol;Acc:HGNC:6280]	39704035	39743285	-	19864	downstream
chr7	ALDBSSCT0000009736	ALDBSSCG0000005937	--	Annotated_lncRNA	39641840	39684170	+	ENSSSCT00000001769	ENSSSCG00000001589	GLP1R	glucagon-like peptide 1 receptor precursor [Source:RefSeq peptide;Acc:NP_001243523]	39595053	39623436	+	18403	downstream
chr7	ALDBSSCT0000009736	ALDBSSCG0000005937	--	Annotated_lncRNA	39641840	39684170	+	ENSSSCT00000001768	ENSSSCG00000001588	DNAH8	dynein, axonemal, heavy chain 8 [Source:HGNC Symbol;Acc:HGNC:2952]	39286129	39569290	+	72549	downstream
chr10	ALDBSSCT0000001517	ALDBSSCG0000000921	--	Annotated_lncRNA	45718755	45783378	-	ENSSSCT00000012066	ENSSSCG00000011022	SVIL	supervillin [Source:HGNC Symbol;Acc:HGNC:11480]	45876739	46000323	-	93360	downstream
chr10	ALDBSSCT0000001517	ALDBSSCG0000000921	--	Annotated_lncRNA	45718755	45783378	-	ENSSSCT00000012064	ENSSSCG00000011022	SVIL	supervillin [Source:HGNC Symbol;Acc:HGNC:11480]	45876739	46000323	-	93360	downstream
chr10	ALDBSSCT0000001519	ALDBSSCG0000000923	--	Annotated_lncRNA	46141748	46143030	-	ENSSSCT00000012065	ENSSSCG00000011023	ZNF438	zinc finger protein 438 [Source:HGNC Symbol;Acc:HGNC:21029]	46149334	46153140	-	6303	downstream
chr9	ALDBSSCT0000011585	ALDBSSCG0000007034	--	Annotated_lncRNA	74619623	74620853	-	ENSSSCT00000033340	ENSSSCG00000015294	CR1	-	74510646	74558059	+	61563	downstream
chr9	ALDBSSCT0000011585	ALDBSSCG0000007034	--	Annotated_lncRNA	74619623	74620853	-	ENSSSCT00000033250	ENSSSCG00000015293	--	--	74572459	74604153	-	15469	upstream
chr9	ALDBSSCT0000011585	ALDBSSCG0000007034	--	Annotated_lncRNA	74619623	74620853	-	ENSSSCT00000016664	ENSSSCG00000015293	--	--	74571783	74604181	-	15441	upstream
chr9	ALDBSSCT0000011585	ALDBSSCG0000007034	--	Annotated_lncRNA	74619623	74620853	-	ENSSSCT00000016665	ENSSSCG00000015294	CR1	-	74529921	74564138	+	55484	downstream
chr9	ALDBSSCT0000011585	ALDBSSCG0000007034	--	Annotated_lncRNA	74619623	74620853	-	ENSSSCT00000016667	ENSSSCG00000015296	--	--	74643999	74657130	+	23145	upstream
chr9	ALDBSSCT0000011585	ALDBSSCG0000007034	--	Annotated_lncRNA	74619623	74620853	-	ENSSSCT00000026189	ENSSSCG00000026399	--	--	74687979	74688687	+	67125	upstream
chr9	ALDBSSCT0000011581	ALDBSSCG0000007032	--	Annotated_lncRNA	72663396	72666726	-	ENSSSCT00000028022	ENSSSCG00000026269	RAB29	RAB29, member RAS oncogene family [Source:HGNC Symbol;Acc:HGNC:9789]	72715501	72724781	-	48774	downstream
chr9	ALDBSSCT0000011581	ALDBSSCG0000007032	--	Annotated_lncRNA	72663396	72666726	-	ENSSSCT00000027543	ENSSSCG00000026547	SLC45A3	solute carrier family 45 member 3 [Source:HGNC Symbol;Acc:HGNC:8642]	72609607	72630937	-	32458	upstream
chr9	ALDBSSCT0000011581	ALDBSSCG0000007032	--	Annotated_lncRNA	72663396	72666726	-	ENSSSCT00000028838	ENSSSCG00000025182	ELK4	ELK4, ETS-domain protein (SRF accessory protein 1) [Source:HGNC Symbol;Acc:HGNC:3326]	72566746	72581074	-	82321	upstream
chr9	ALDBSSCT0000011581	ALDBSSCG0000007032	--	Annotated_lncRNA	72663396	72666726	-	ENSSSCT00000030608	ENSSSCG00000022398	NUCKS1	nuclear casein kinase and cyclin-dependent kinase substrate 1 [Source:HGNC Symbol;Acc:HGNC:29923]	72668703	72701471	-	1976	downstream
chr9	ALDBSSCT0000011581	ALDBSSCG0000007032	--	Annotated_lncRNA	72663396	72666726	-	ENSSSCT00000028316	ENSSSCG00000020783	SLC41A1	solute carrier family 41 (magnesium transporter), member 1 [Source:HGNC Symbol;Acc:HGNC:19429]	72739714	72763825	-	72987	downstream
chr1	ALDBSSCT0000000021	ALDBSSCG0000000013	--	Annotated_lncRNA	4742967	4743535	+	ENSSSCT00000004453	ENSSSCG00000004027	PDE10A	phosphodiesterase 10A [Source:HGNC Symbol;Acc:HGNC:8772]	4635847	4742048	+	918	downstream
chr1	ALDBSSCT0000000021	ALDBSSCG0000000013	--	Annotated_lncRNA	4742967	4743535	+	ENSSSCT00000004454	ENSSSCG00000004028	C6orf118	chromosome 6 open reading frame 118 [Source:HGNC Symbol;Acc:HGNC:21233]	4758551	4776214	+	15015	upstream
chr5	ALDBSSCT0000008467	ALDBSSCG0000005144	--	Annotated_lncRNA	106499744	106501189	+	ENSSSCT00000028012	ENSSSCG00000025095	PPP1R12A	protein phosphatase 1 regulatory subunit 12A [Source:HGNC Symbol;Acc:HGNC:7618]	106583802	106610194	+	82612	upstream
chr5	ALDBSSCT0000008462	ALDBSSCG0000005142	--	Annotated_lncRNA	105368795	105397053	+	ENSSSCT00000001027	ENSSSCG00000000939	ACSS3	acyl-CoA synthetase short-chain family member 3 [Source:HGNC Symbol;Acc:HGNC:24723]	105196506	105368281	-	513	upstream
chr5	ALDBSSCT0000008462	ALDBSSCG0000005142	--	Annotated_lncRNA	105368795	105397053	+	ENSSSCT00000001025	ENSSSCG00000000938	LIN7A	lin-7 homolog A (C. elegans) [Source:HGNC Symbol;Acc:HGNC:17787]	105477330	105610293	+	80276	upstream
chr5	ALDBSSCT0000008469	ALDBSSCG0000005146	--	Annotated_lncRNA	106735870	106742875	+	ENSSSCT00000001037	ENSSSCG00000000948	SYT1	synaptotagmin 1 [Source:HGNC Symbol;Acc:HGNC:11509]	106815515	107014135	-	72639	downstream
chr9	ALDBSSCT0000011567	ALDBSSCG0000007022	--	Annotated_lncRNA	63784783	63785630	-	ENSSSCT00000016621	ENSSSCG00000015252	SNX19	sorting nexin 19 [Source:HGNC Symbol;Acc:HGNC:21532]	63790485	63829935	-	4854	downstream
chr13	ALDBSSCT0000003076	ALDBSSCG0000001846	--	Annotated_lncRNA	23799471	23800355	-	ENSSSCT00000012306	ENSSSCG00000011239	--	--	23827615	23843363	+	27259	upstream
chr13	ALDBSSCT0000003076	ALDBSSCG0000001846	--	Annotated_lncRNA	23799471	23800355	-	ENSSSCT00000032516	ENSSSCG00000027738	LRRFIP2	leucine rich repeat (in FLII) interacting protein 2 [Source:HGNC Symbol;Acc:HGNC:6703]	23693327	23766755	-	32715	upstream
chr13	ALDBSSCT0000003076	ALDBSSCG0000001846	--	Annotated_lncRNA	23799471	23800355	-	ENSSSCT00000032126	ENSSSCG00000030247	EPM2AIP1	EPM2A (laforin) interacting protein 1 [Source:HGNC Symbol;Acc:HGNC:19735]	23780210	23782036	-	17434	upstream
chr13	ALDBSSCT0000003076	ALDBSSCG0000001846	--	Annotated_lncRNA	23799471	23800355	-	ENSSSCT00000030165	ENSSSCG00000027738	LRRFIP2	leucine rich repeat (in FLII) interacting protein 2 [Source:HGNC Symbol;Acc:HGNC:6703]	23693327	23766755	-	32715	upstream
chr6	ALDBSSCT0000009393	ALDBSSCG0000005727	--	Annotated_lncRNA	62967916	62978408	-	ENSSSCT00000036631	ENSSSCG00000003386	TNFRSF9	tumor necrosis factor receptor superfamily member 9 [Source:HGNC Symbol;Acc:HGNC:11924]	63060353	63071870	+	81944	upstream
chr6	ALDBSSCT0000009393	ALDBSSCG0000005727	--	Annotated_lncRNA	62967916	62978408	-	ENSSSCT00000003756	ENSSSCG00000003385	PARK7	parkinson protein 7 [Source:HGNC Symbol;Acc:HGNC:16369]	63023405	63034058	-	44996	downstream
chr6	ALDBSSCT0000009393	ALDBSSCG0000005727	--	Annotated_lncRNA	62967916	62978408	-	ENSSSCT00000003757	ENSSSCG00000003386	TNFRSF9	tumor necrosis factor receptor superfamily member 9 [Source:HGNC Symbol;Acc:HGNC:11924]	63053856	63071356	+	75447	upstream
chr6	ALDBSSCT0000009393	ALDBSSCG0000005727	--	Annotated_lncRNA	62967916	62978408	-	ENSSSCT00000035166	ENSSSCG00000003386	TNFRSF9	tumor necrosis factor receptor superfamily member 9 [Source:HGNC Symbol;Acc:HGNC:11924]	63054747	63058141	+	76338	upstream
chr6	ALDBSSCT0000009393	ALDBSSCG0000005727	--	Annotated_lncRNA	62967916	62978408	-	ENSSSCT00000032889	ENSSSCG00000003386	TNFRSF9	tumor necrosis factor receptor superfamily member 9 [Source:HGNC Symbol;Acc:HGNC:11924]	63057439	63058141	+	79030	upstream
chr6	ALDBSSCT0000009393	ALDBSSCG0000005727	--	Annotated_lncRNA	62967916	62978408	-	ENSSSCT00000033147	ENSSSCG00000003386	TNFRSF9	tumor necrosis factor receptor superfamily member 9 [Source:HGNC Symbol;Acc:HGNC:11924]	63060353	63071739	+	81944	upstream
chr6	ALDBSSCT0000009422	ALDBSSCG0000005746	--	Annotated_lncRNA	74416993	74418325	-	ENSSSCT00000003913	ENSSSCG00000003522	--	--	74508412	74512949	+	90086	upstream
chr6	ALDBSSCT0000009394	ALDBSSCG0000005728	--	Annotated_lncRNA	63340090	63342611	-	ENSSSCT00000003759	ENSSSCG00000003388	--	--	63403590	63412859	-	60978	downstream
chr6	ALDBSSCT0000009394	ALDBSSCG0000005728	--	Annotated_lncRNA	63340090	63342611	-	ENSSSCT00000022393	ENSSSCG00000020905	--	--	63293253	63294406	+	45683	downstream
chr3	ALDBSSCT0000006986	ALDBSSCG0000004241	--	Annotated_lncRNA	853574	862528	-	ENSSSCT00000029725	ENSSSCG00000007555	UNCX	UNC homeobox [Source:HGNC Symbol;Acc:HGNC:33194]	913027	917455	+	50498	upstream
chr3	ALDBSSCT0000006986	ALDBSSCG0000004241	--	Annotated_lncRNA	853574	862528	-	ENSSSCT00000008283	ENSSSCG00000007551	GPR146	G protein-coupled receptor 146 [Source:HGNC Symbol;Acc:HGNC:21718]	809111	809866	+	43707	downstream
chr3	ALDBSSCT0000006986	ALDBSSCG0000004241	--	Annotated_lncRNA	853574	862528	-	ENSSSCT00000008282	ENSSSCG00000007550	COX19	COX19 cytochrome c oxidase assembly factor [Source:HGNC Symbol;Acc:HGNC:28074]	758420	762534	+	91039	downstream
chr3	ALDBSSCT0000006986	ALDBSSCG0000004241	--	Annotated_lncRNA	853574	862528	-	ENSSSCT00000008284	ENSSSCG00000007552	--	--	823182	824222	+	29351	downstream
chr3	ALDBSSCT0000006986	ALDBSSCG0000004241	--	Annotated_lncRNA	853574	862528	-	ENSSSCT00000008287	ENSSSCG00000007555	UNCX	UNC homeobox [Source:HGNC Symbol;Acc:HGNC:33194]	913027	917455	+	50498	upstream
chr3	ALDBSSCT0000006986	ALDBSSCG0000004241	--	Annotated_lncRNA	853574	862528	-	ENSSSCT00000008286	ENSSSCG00000007554	ZFAND2A	zinc finger, AN1-type domain 2A [Source:HGNC Symbol;Acc:HGNC:28073]	873366	879193	-	10837	downstream
chr3	ALDBSSCT0000006986	ALDBSSCG0000004241	--	Annotated_lncRNA	853574	862528	-	ENSSSCT00000022811	ENSSSCG00000026422	GPER1	G protein-coupled estrogen receptor 1 [Source:HGNC Symbol;Acc:HGNC:4485]	828571	833135	+	20438	downstream
chr15	ALDBSSCT0000004352	ALDBSSCG0000002638	--	Annotated_lncRNA	147200874	147223254	+	ENSSSCT00000025634	ENSSSCG00000025038	KCNJ13	potassium channel, inwardly rectifying subfamily J, member 13 [Source:HGNC Symbol;Acc:HGNC:6259]	147163961	147174557	+	26316	downstream
chr15	ALDBSSCT0000004352	ALDBSSCG0000002638	--	Annotated_lncRNA	147200874	147223254	+	ENSSSCT00000026011	ENSSSCG00000022612	--	--	147281211	147314281	+	57956	upstream
chr15	ALDBSSCT0000004352	ALDBSSCG0000002638	--	Annotated_lncRNA	147200874	147223254	+	ENSSSCT00000017739	ENSSSCG00000016290	EFHD1	EF-hand domain family member D1 [Source:HGNC Symbol;Acc:HGNC:29556]	147077260	147124589	+	76284	downstream
chr15	ALDBSSCT0000004352	ALDBSSCG0000002638	--	Annotated_lncRNA	147200874	147223254	+	ENSSSCT00000017740	ENSSSCG00000016291	--	--	147145312	147196329	-	4544	upstream
chr3	ALDBSSCT0000007106	ALDBSSCG0000004322	--	Annotated_lncRNA	38938179	38940065	-	ENSSSCT00000008704	ENSSSCG00000007942	HMOX2	heme oxygenase 2 [Source:HGNC Symbol;Acc:HGNC:5014]	38895256	38922993	-	15185	upstream
chr3	ALDBSSCT0000007106	ALDBSSCG0000004322	--	Annotated_lncRNA	38938179	38940065	-	ENSSSCT00000008705	ENSSSCG00000007943	NMRAL1	NmrA-like family domain containing 1 [Source:HGNC Symbol;Acc:HGNC:24987]	38927264	38934243	+	3935	downstream
chr3	ALDBSSCT0000007106	ALDBSSCG0000004322	--	Annotated_lncRNA	38938179	38940065	-	ENSSSCT00000008707	ENSSSCG00000007944	--	--	38983198	39040299	+	43132	upstream
chr3	ALDBSSCT0000007106	ALDBSSCG0000004322	--	Annotated_lncRNA	38938179	38940065	-	ENSSSCT00000008702	ENSSSCG00000007940	C16orf96	chromosome 16 open reading frame 96 [Source:HGNC Symbol;Acc:HGNC:40031]	38847274	38856402	+	81776	downstream
chr3	ALDBSSCT0000007106	ALDBSSCG0000004322	--	Annotated_lncRNA	38938179	38940065	-	ENSSSCT00000008703	ENSSSCG00000007941	CDIP1	cell death-inducing p53 target 1 [Source:HGNC Symbol;Acc:HGNC:13234]	38890996	38894684	+	43494	downstream
chr3	ALDBSSCT0000007106	ALDBSSCG0000004322	--	Annotated_lncRNA	38938179	38940065	-	ENSSSCT00000027262	ENSSSCG00000025561	VASN	vasorin [Source:HGNC Symbol;Acc:HGNC:18517]	39017127	39019160	-	77061	downstream
chr3	ALDBSSCT0000007106	ALDBSSCG0000004322	--	Annotated_lncRNA	38938179	38940065	-	ENSSSCT00000025145	ENSSSCG00000022874	DNAJA3	DnaJ heat shock protein family (Hsp40) member A3 [Source:HGNC Symbol;Acc:HGNC:11808]	38944891	38974098	-	4825	downstream
chrX	ENSSSCT00000033052	ENSSSCG00000031028	CH242-15C8.2	Annotated_lncRNA	41061659	41063153	+	ENSSSCT00000013397	ENSSSCG00000012251	USP9X	ubiquitin specific peptidase 9, X-linked [Source:HGNC Symbol;Acc:HGNC:12632]	41007301	41060997	+	661	downstream
chrX	ENSSSCT00000033052	ENSSSCG00000031028	CH242-15C8.2	Annotated_lncRNA	41061659	41063153	+	ENSSSCT00000013398	ENSSSCG00000012252	DDX3X	DEAD (Asp-Glu-Ala-Asp) box helicase 3, X-linked [Source:HGNC Symbol;Acc:HGNC:2745]	41161892	41177782	+	98738	upstream
chr4	ALDBSSCT0000007736	ALDBSSCG0000004698	--	Annotated_lncRNA	136746877	136747686	+	ENSSSCT00000034411	ENSSSCG00000006911	TGFBR3	transforming growth factor beta receptor III [Source:HGNC Symbol;Acc:HGNC:11774]	136819881	136890914	+	72194	upstream
chrX	LNC_000714	XLOC_065436	--	Novel_lncRNA	143994388	144016730	-	ENSSSCT00000014026	ENSSSCG00000012832	MXRA5	matrix-remodelling associated 5 [Source:HGNC Symbol;Acc:HGNC:7539]	143912804	143940427	-	53960	upstream
chrX	LNC_000714	XLOC_065436	--	Novel_lncRNA	143994388	144016730	-	ENSSSCT00000014027	ENSSSCG00000012832	MXRA5	matrix-remodelling associated 5 [Source:HGNC Symbol;Acc:HGNC:7539]	143912804	143940427	-	53960	upstream
chrX	LNC_000712	XLOC_065313	--	Novel_lncRNA	123382863	123384511	-	ENSSSCT00000027121	ENSSSCG00000026535	--	--	123356204	123364688	+	18174	downstream
chrX	LNC_000712	XLOC_065313	--	Novel_lncRNA	123382863	123384511	-	ENSSSCT00000031328	ENSSSCG00000026535	--	--	123357144	123364688	+	18174	downstream
chrX	LNC_000713	XLOC_065436	--	Novel_lncRNA	143986421	144005893	-	ENSSSCT00000014026	ENSSSCG00000012832	MXRA5	matrix-remodelling associated 5 [Source:HGNC Symbol;Acc:HGNC:7539]	143912804	143940427	-	45993	upstream
chrX	LNC_000713	XLOC_065436	--	Novel_lncRNA	143986421	144005893	-	ENSSSCT00000014027	ENSSSCG00000012832	MXRA5	matrix-remodelling associated 5 [Source:HGNC Symbol;Acc:HGNC:7539]	143912804	143940427	-	45993	upstream
chrX	LNC_000711	XLOC_065260	--	Novel_lncRNA	112626143	112640441	-	ENSSSCT00000035832	ENSSSCG00000030833	MCTS1	malignant T-cell amplified sequence 1 [Source:HGNC Symbol;Acc:HGNC:23357]	112656880	112668876	-	16438	downstream
chrX	LNC_000711	XLOC_065260	--	Novel_lncRNA	112626143	112640441	-	ENSSSCT00000033948	ENSSSCG00000030833	MCTS1	malignant T-cell amplified sequence 1 [Source:HGNC Symbol;Acc:HGNC:23357]	112656880	112669156	-	16438	downstream
chrX	LNC_000711	XLOC_065260	--	Novel_lncRNA	112626143	112640441	-	ENSSSCT00000034615	ENSSSCG00000030833	MCTS1	malignant T-cell amplified sequence 1 [Source:HGNC Symbol;Acc:HGNC:23357]	112657003	112668853	-	16561	downstream
chrX	LNC_000711	XLOC_065260	--	Novel_lncRNA	112626143	112640441	-	ENSSSCT00000013781	ENSSSCG00000012602	C1GALT1C1	-	112640598	112644344	+	156	upstream
chrX	LNC_000711	XLOC_065260	--	Novel_lncRNA	112626143	112640441	-	ENSSSCT00000013782	ENSSSCG00000012603	--	--	112689763	112716224	+	49321	upstream
chrX	LNC_000711	XLOC_065260	--	Novel_lncRNA	112626143	112640441	-	ENSSSCT00000033290	ENSSSCG00000030833	MCTS1	malignant T-cell amplified sequence 1 [Source:HGNC Symbol;Acc:HGNC:23357]	112656880	112668741	-	16438	downstream
chr14	ALDBSSCT0000003640	ALDBSSCG0000002179	--	Annotated_lncRNA	72365229	72404386	+	ENSSSCT00000011195	ENSSSCG00000010229	REEP3	receptor accessory protein 3 [Source:HGNC Symbol;Acc:HGNC:23711]	72331769	72356665	+	8563	downstream
chr14	ALDBSSCT0000003640	ALDBSSCG0000002179	--	Annotated_lncRNA	72365229	72404386	+	ENSSSCT00000024037	ENSSSCG00000010229	REEP3	receptor accessory protein 3 [Source:HGNC Symbol;Acc:HGNC:23711]	72331769	72357184	+	8044	downstream
chr9	ALDBSSCT0000011365	ALDBSSCG0000006904	--	Annotated_lncRNA	142137537	142144029	+	ENSSSCT00000016975	ENSSSCG00000015582	--	--	142083587	142135830	+	1706	downstream
chr9	ALDBSSCT0000011365	ALDBSSCG0000006904	--	Annotated_lncRNA	142137537	142144029	+	ENSSSCT00000016976	ENSSSCG00000015583	SMYD2	N-lysine methyltransferase SMYD2 [Source:RefSeq peptide;Acc:NP_001153563]	142158968	142212600	-	14938	downstream
chr4	ALDBSSCT0000008066	ALDBSSCG0000004892	--	Annotated_lncRNA	102627639	102632551	-	ENSSSCT00000007112	ENSSSCG00000006493	PMF1	polyamine-modulated factor 1 [Source:HGNC Symbol;Acc:HGNC:9112]	102551672	102579227	-	48411	upstream
chr4	ALDBSSCT0000008066	ALDBSSCG0000004892	--	Annotated_lncRNA	102627639	102632551	-	ENSSSCT00000007113	ENSSSCG00000006494	SLC25A44	solute carrier family 25 member 44 [Source:HGNC Symbol;Acc:HGNC:29036]	102579409	102593041	-	34597	upstream
chr4	ALDBSSCT0000008066	ALDBSSCG0000004892	--	Annotated_lncRNA	102627639	102632551	-	ENSSSCT00000007114	ENSSSCG00000006495	SEMA4A	sema domain, immunoglobulin domain (Ig), transmembrane domain (TM) and short cytoplasmic domain, (semaphorin) 4A [Source:HGNC Symbol;Acc:HGNC:10729]	102610616	102625450	-	2188	upstream
chr4	ALDBSSCT0000008066	ALDBSSCG0000004892	--	Annotated_lncRNA	102627639	102632551	-	ENSSSCT00000007115	ENSSSCG00000006496	LMNA	lamin A/C [Source:HGNC Symbol;Acc:HGNC:6636]	102642366	102661829	-	9814	downstream
chr4	ALDBSSCT0000008066	ALDBSSCG0000004892	--	Annotated_lncRNA	102627639	102632551	-	ENSSSCT00000007116	ENSSSCG00000006497	MEX3A	mex-3 RNA binding family member A [Source:HGNC Symbol;Acc:HGNC:33482]	102693410	102698280	+	60858	upstream
chr4	ALDBSSCT0000008066	ALDBSSCG0000004892	--	Annotated_lncRNA	102627639	102632551	-	ENSSSCT00000007117	ENSSSCG00000006498	RAB25	RAB25, member RAS oncogene family [Source:HGNC Symbol;Acc:HGNC:18238]	102703922	102713495	-	71370	downstream
chr4	ALDBSSCT0000008066	ALDBSSCG0000004892	--	Annotated_lncRNA	102627639	102632551	-	ENSSSCT00000007118	ENSSSCG00000006499	LAMTOR2	late endosomal/lysosomal adaptor, MAPK and MTOR activator 2 [Source:HGNC Symbol;Acc:HGNC:29796]	102714740	102719077	-	82188	downstream
chr4	ALDBSSCT0000008066	ALDBSSCG0000004892	--	Annotated_lncRNA	102627639	102632551	-	ENSSSCT00000007119	ENSSSCG00000006500	UBQLN4	ubiquilin 4 [Source:HGNC Symbol;Acc:HGNC:1237]	102719112	102738030	+	86560	upstream
chr7	ALDBSSCT0000009643	ALDBSSCG0000005884	--	Annotated_lncRNA	9955764	9957965	+	ENSSSCT00000001147	ENSSSCG00000001053	TBC1D7	TBC1 domain family member 7 [Source:HGNC Symbol;Acc:HGNC:21066]	9976369	10048579	-	18403	downstream
chr7	ALDBSSCT0000009643	ALDBSSCG0000005884	--	Annotated_lncRNA	9955764	9957965	+	ENSSSCT00000001146	ENSSSCG00000001052	PHACTR1	phosphatase and actin regulator 1 [Source:HGNC Symbol;Acc:HGNC:20990]	9509245	9954959	+	804	downstream
chr3	ALDBSSCT0000006676	ALDBSSCG0000004078	--	Annotated_lncRNA	41542151	41546855	+	ENSSSCT00000008779	ENSSSCG00000008011	GNG13	guanine nucleotide binding protein (G protein), gamma 13 [Source:HGNC Symbol;Acc:HGNC:14131]	41476392	41476740	-	65410	upstream
chr3	ALDBSSCT0000006676	ALDBSSCG0000004078	--	Annotated_lncRNA	41542151	41546855	+	ENSSSCT00000008778	ENSSSCG00000008010	CHTF18	chromosome transmission fidelity factor 18 [Source:HGNC Symbol;Acc:HGNC:18435]	41468380	41476142	+	66008	downstream
chr3	ALDBSSCT0000006676	ALDBSSCG0000004078	--	Annotated_lncRNA	41542151	41546855	+	ENSSSCT00000008768	ENSSSCG00000008000	RPUSD1	RNA pseudouridylate synthase domain containing 1 [Source:HGNC Symbol;Acc:HGNC:14173]	41465703	41468134	-	74016	upstream
chr3	ALDBSSCT0000006676	ALDBSSCG0000004078	--	Annotated_lncRNA	41542151	41546855	+	ENSSSCT00000008769	ENSSSCG00000008001	MSLN	mesothelin [Source:HGNC Symbol;Acc:HGNC:7371]	41448662	41452015	+	90135	downstream
chr3	ALDBSSCT0000006676	ALDBSSCG0000004078	--	Annotated_lncRNA	41542151	41546855	+	ENSSSCT00000008777	ENSSSCG00000008009	LMF1	lipase maturation factor 1 [Source:HGNC Symbol;Acc:HGNC:14154]	41548506	41564662	-	1650	downstream
chr3	ALDBSSCT0000006676	ALDBSSCG0000004078	--	Annotated_lncRNA	41542151	41546855	+	ENSSSCT00000008781	ENSSSCG00000008013	IGFALS	insulin like growth factor binding protein acid labile subunit [Source:HGNC Symbol;Acc:HGNC:5468]	41634233	41637223	-	87377	downstream
chr3	ALDBSSCT0000006676	ALDBSSCG0000004078	--	Annotated_lncRNA	41542151	41546855	+	ENSSSCT00000008783	ENSSSCG00000008015	SPSB3	splA/ryanodine receptor domain and SOCS box containing 3 [Source:HGNC Symbol;Acc:HGNC:30629]	41622664	41625791	-	75808	downstream
chr3	ALDBSSCT0000006676	ALDBSSCG0000004078	--	Annotated_lncRNA	41542151	41546855	+	ENSSSCT00000031631	ENSSSCG00000008010	CHTF18	chromosome transmission fidelity factor 18 [Source:HGNC Symbol;Acc:HGNC:18435]	41468267	41476142	+	66008	downstream
chr3	ALDBSSCT0000006676	ALDBSSCG0000004078	--	Annotated_lncRNA	41542151	41546855	+	ENSSSCT00000008782	ENSSSCG00000008014	NUBP2	nucleotide binding protein 2 [Source:HGNC Symbol;Acc:HGNC:8042]	41631025	41633605	+	84169	upstream
chr3	ALDBSSCT0000006676	ALDBSSCG0000004078	--	Annotated_lncRNA	41542151	41546855	+	ENSSSCT00000023757	ENSSSCG00000023487	MSLNL	mesothelin-like [Source:HGNC Symbol;Acc:HGNC:14170]	41452706	41460404	-	81746	upstream
chr13	ALDBSSCT0000003229	ALDBSSCG0000001944	--	Annotated_lncRNA	90659047	90739906	-	ENSSSCT00000012783	ENSSSCG00000011677	GK5	glycerol kinase 5 (putative) [Source:HGNC Symbol;Acc:HGNC:28635]	90755731	90838778	-	15824	downstream
chr2	ALDBSSCT0000006510	ALDBSSCG0000003978	--	Annotated_lncRNA	157383171	157384842	-	ENSSSCT00000015780	ENSSSCG00000014435	--	--	157388251	157428464	-	3408	downstream
chr2	ALDBSSCT0000006510	ALDBSSCG0000003978	--	Annotated_lncRNA	157383171	157384842	-	ENSSSCT00000015781	ENSSSCG00000014436	ARHGEF37	Rho guanine nucleotide exchange factor 37 [Source:HGNC Symbol;Acc:HGNC:34430]	157445243	157501653	+	60400	upstream
chr2	ALDBSSCT0000006510	ALDBSSCG0000003978	--	Annotated_lncRNA	157383171	157384842	-	ENSSSCT00000015779	ENSSSCG00000014434	IL17B	interleukin 17B [Source:HGNC Symbol;Acc:HGNC:5982]	157307147	157311262	-	71908	upstream
chr2	ALDBSSCT0000006510	ALDBSSCG0000003978	--	Annotated_lncRNA	157383171	157384842	-	ENSSSCT00000032981	ENSSSCG00000014434	IL17B	interleukin 17B [Source:HGNC Symbol;Acc:HGNC:5982]	157307150	157311035	-	72135	upstream
chr2	ALDBSSCT0000006510	ALDBSSCG0000003978	--	Annotated_lncRNA	157383171	157384842	-	ENSSSCT00000015778	ENSSSCG00000014433	PCYOX1L	prenylcysteine oxidase 1 like [Source:HGNC Symbol;Acc:HGNC:28477]	157292112	157303137	+	80033	downstream
chr13	ALDBSSCT0000003221	ALDBSSCG0000001937	--	Annotated_lncRNA	87209879	87255572	-	ENSSSCT00000024030	ENSSSCG00000021203	--	--	87095136	87176240	-	33638	upstream
[truncated: 5,090 more rows]
