# Supplementary material for: Systematic Analysis of Long Non-Coding RNAs and mRNAs in the Ovaries of Duroc Pigs During Different Follicular Stages Using RNA Sequencing
Source: Int J Mol Sci. 2018 Jun 11;19(6):1722. doi: 10.3390/ijms19061722 (PMC6032137; doi:10.3390/ijms19061722)
Supplement: Supplementary file 1 [file ijms-19-01722-s001.zip › Supplementary Table S6.xlsx]

## Sheet: Sheet1
Systematic analysis of long non-coding RNAs and mRNAs in the ovaries of Duroc pigs during different follicular stages using RNA sequencing Yi Liu, Mengxun Li, Xinwen Bo, Li Tao, Lipeng Ma, Tenjiao Zhai, Tao Huang
Supplementary Table S6. Primer sequence for the selected genes for Real-time RT-PCR.
Transcript_id	Primer sequence（5'→3'）	Amplicon length (bp)	Tm (°C)
ENSSSCT00000034907	F:CCCCACTCCCTGAGCTATT	167	54
	R:TGCCCCTCCTGCTGTAT
ALDBSSCT0000002757	F:ACCGAGGACCCTAATCCCTT	151	54
	R:CAAGGATTCCTGTTGCAGCATT
ALDBSSCT0000002392	F:CCTCACTCTGCGCCTGTG	147	54
	R:GCGTTCTCTTCGCCTTTTG
ALDBSSCT0000001721	F:ACTCTTCAGTGGAGCTGACAA	81	52
	R:TGGTCAAATTTTCCCTGGGATTG
ALDBSSCT0000011315	F:GAGGGTGGGGAGGAAATCG	93	56
	R:TTCTGCTTCCTCCTTTCGGC
LNC_000253	F:CCAGGACTCTGTGTCGGTGAAG	135	53
	R:GAAGTATTGACGGCAGTGAGC
ALDBSSCT0000000482	F:GGCTGGGTCCGAGCATC	128	57
	R:AGGCTCCCTATCACCTCCG
ALDBSSCT0000011287	F:GATTGGCTGGGCTGTAGAG	185	53
	R:TTGGAAGAAGAGAGGCAGACT
ALDBSSCT0000008511	F:GGTATCCAGCCAAACAAAG	102	51
	R:GACGCCGAAATCCCATC
DHRS4	F:ATCGTGTCTTTCCTATGCTCTG	249	52
	R:GGACGCTGGCTCTTTTCA
IBSP	F:ACCTCCACCCCAGGACATCT	144	55
	R:GGTTCCCCATTCTCGCTTT
AKT3	F:TCCCCTCAACAACTTTTCAG	202	53
	R:TCTCTCCTCCTCTTGCCTCT
BMP7	F:AGGCGTGTGAGGGTATTTG	109	50
	R:TCCTGCGGTTGGGTTTC
CAMKK2	F:GGGGGGGGTTGAAAATC	297	51
	R:CCTCTGGGGTCGGAAAA
SCARB1	F:TTCTCTCCCATCCTCACTTCT	187	50
	R:GTTTGTCCAATGCCTTTCAC
RPS6KA3	F:CTCTTTCGGGGGTTTAGTTT	244	48
	R:CTGTAGGGTCTCTCTTGCTTTT
